# Supplementary material for: Synchronized age-related gene expression changes across multiple tissues in human and the link to complex diseases
Source: PubMed Central journal article supplement (PMC4609956; doi:10.1038/srep15145), 2015-10-19

# **Synchronized age-related gene expression changes across multiple tissues in human and the link to complex diseases**

Running Title: Age-related gene expression changes in multiple tissues

**Jialiang Yang<sup>1,2</sup>, Tao Huang<sup>1,2,¶</sup>, Francesca Petralia<sup>1,2</sup>, Quan Long<sup>1,2</sup>, Bin Zhang<sup>1,2</sup>, Carmen Armann<sup>1,2</sup>, Yong Zhao<sup>1,2</sup>, Charles V Mobbs<sup>3,4,5</sup>, GTEx Consortium, Eric E Schadt<sup>1,2</sup>, Jun Zhu<sup>1,2</sup>, Zhidong Tu<sup>1,2\*</sup>**

<sup>1</sup> Institute of Genomics and Multiscale Biology, Icahn School of Medicine at Mount Sinai, NY, 10029, USA

<sup>2</sup> Department of Genetics and Genomic Sciences, Icahn School of Medicine at Mount Sinai , NY, 10029, USA

<sup>3</sup> Department of Neuroscience, Icahn School of Medicine at Mount Sinai, NY, 10029, USA

<sup>4</sup> Department of Geriatrics and Palliative Medicine, Icahn School of Medicine at Mount Sinai , NY, 10029, USA

<sup>5</sup> Department of Medicine, Endocrinology, Diabetes and Bone Disease, Icahn School of Medicine at Mount Sinai , NY, 10029, USA

¶ Current: Institute of Health Sciences, Shanghai Institutes for Biological Sciences, Chinese Academy of Sciences, Shanghai 200031, People's Republic of China

\*Corresponding author: Zhidong Tu

Icahn Institute for Genomics and Multiscale Biology, Department of Genetics and Genomic Sciences, Icahn School of Medicine at Mount Sinai, One Gustave L. Levy Place - Box 1498, 1425 Madison Ave, IMI 3-70F, New York, NY 10029-6574

PH: 212-659-8508 Email addresses: [zhidong.tu@mssm.edu](mailto:zhidong.tu@mssm.edu)

Adipose: PYHIN1 Pearson-R=0.63 Pval=7.43E-12

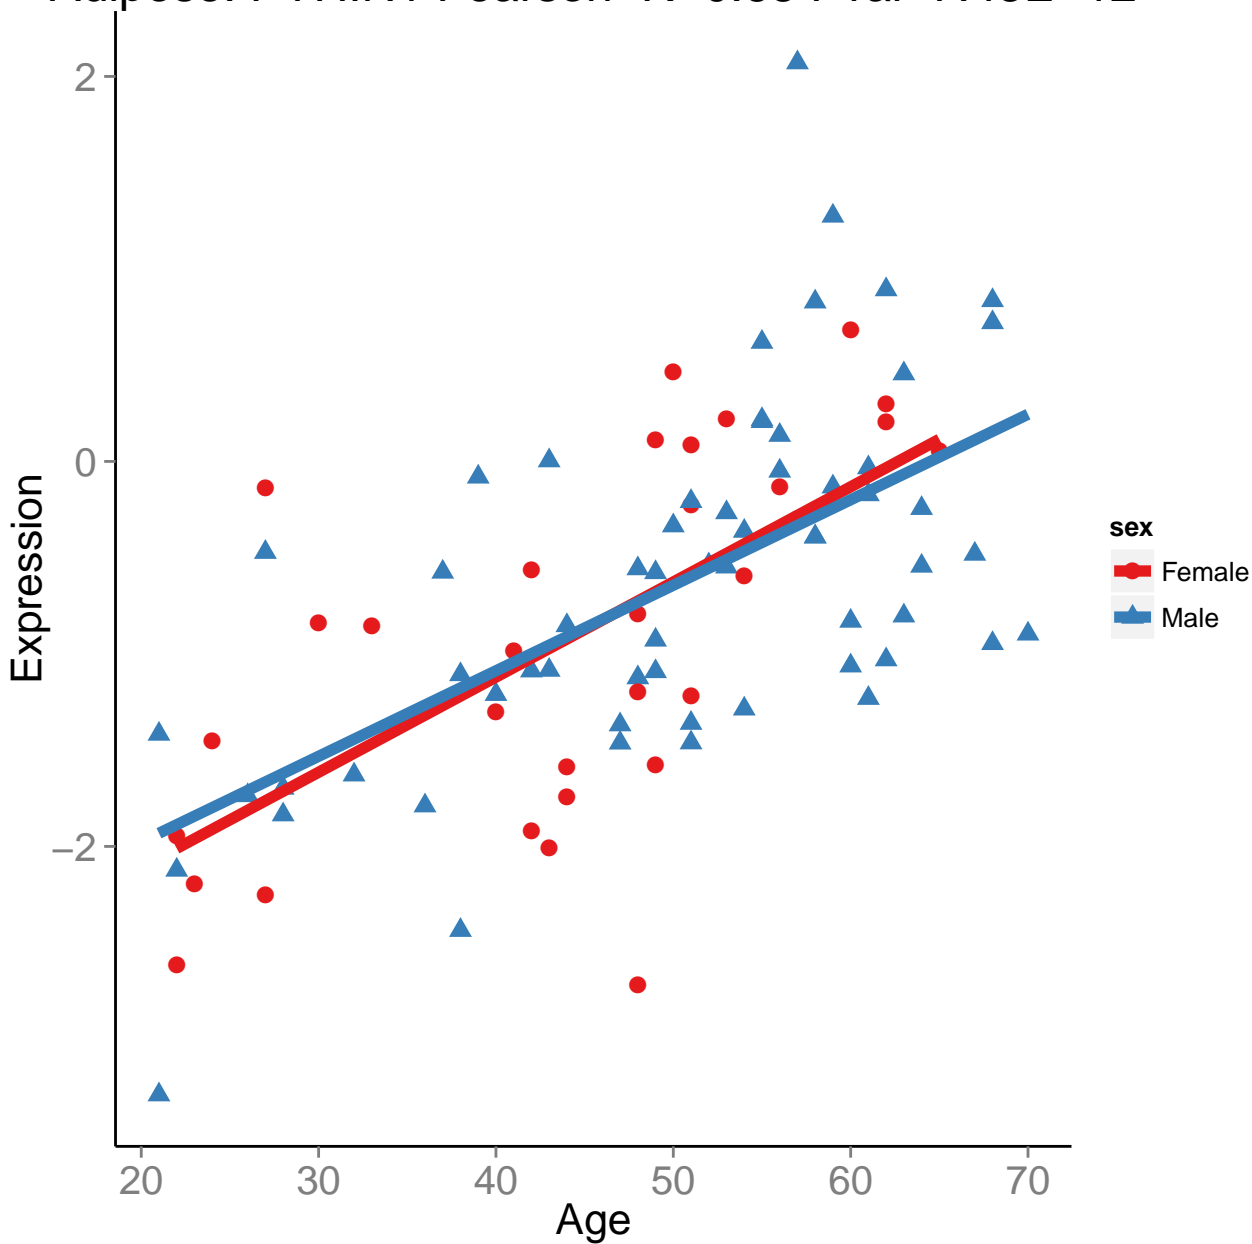

Adipose: SCN1B Pearson-R=0.58 Pval=6.15E-10

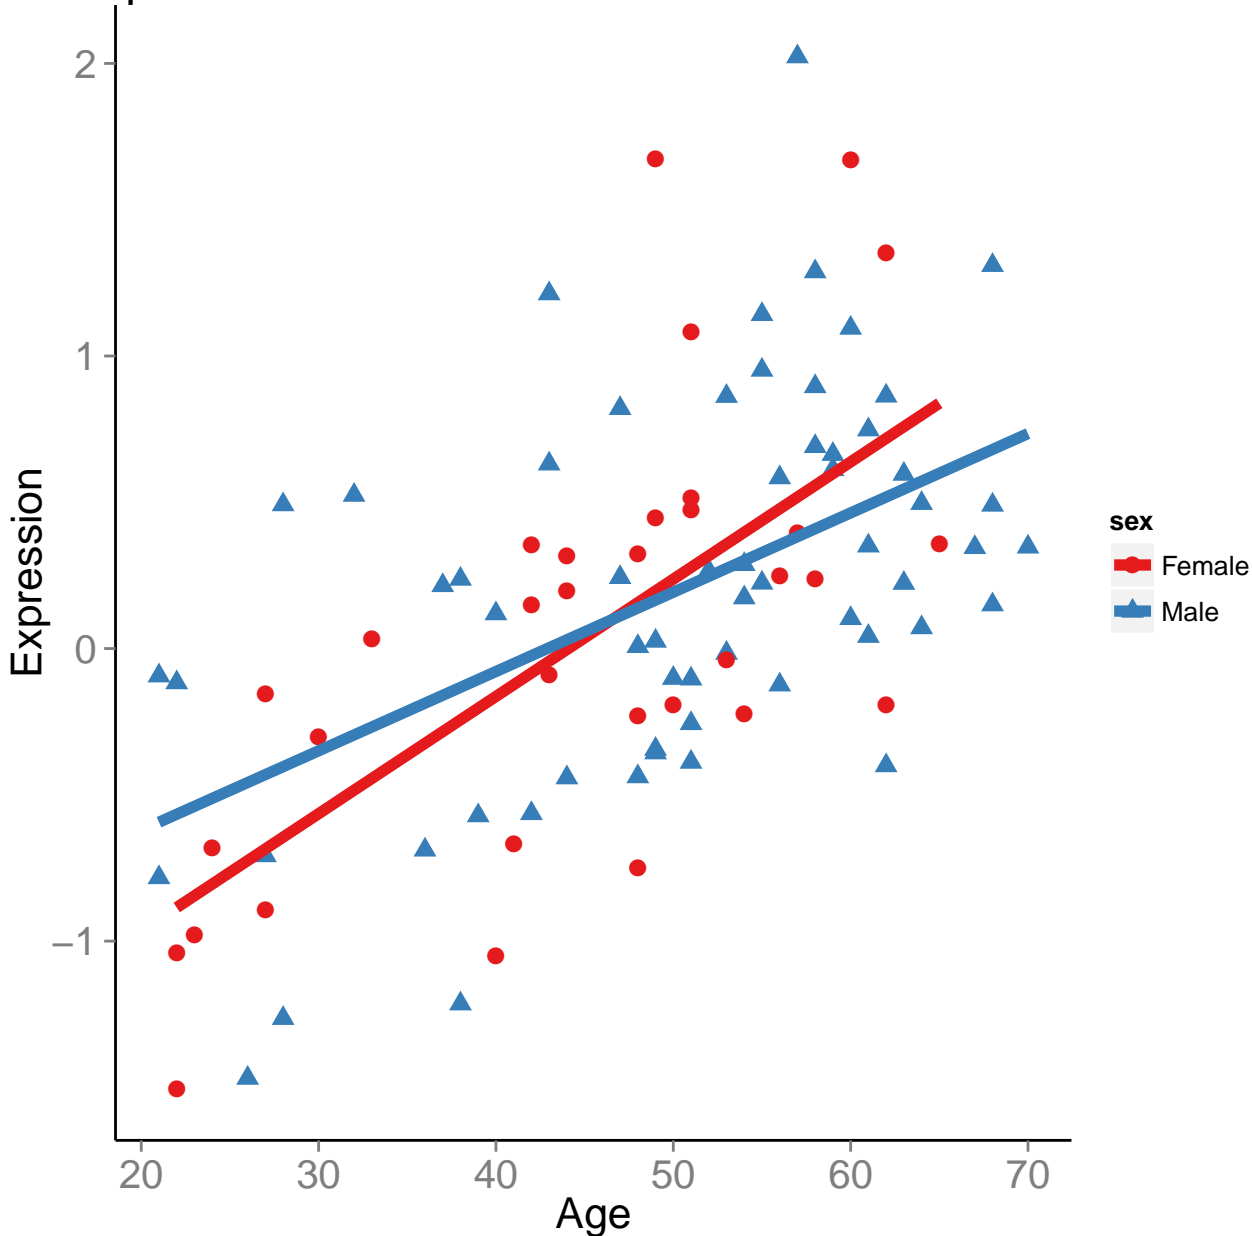

Adipose: EDA2R Pearson-R=0.58 Pval=7.15E-10

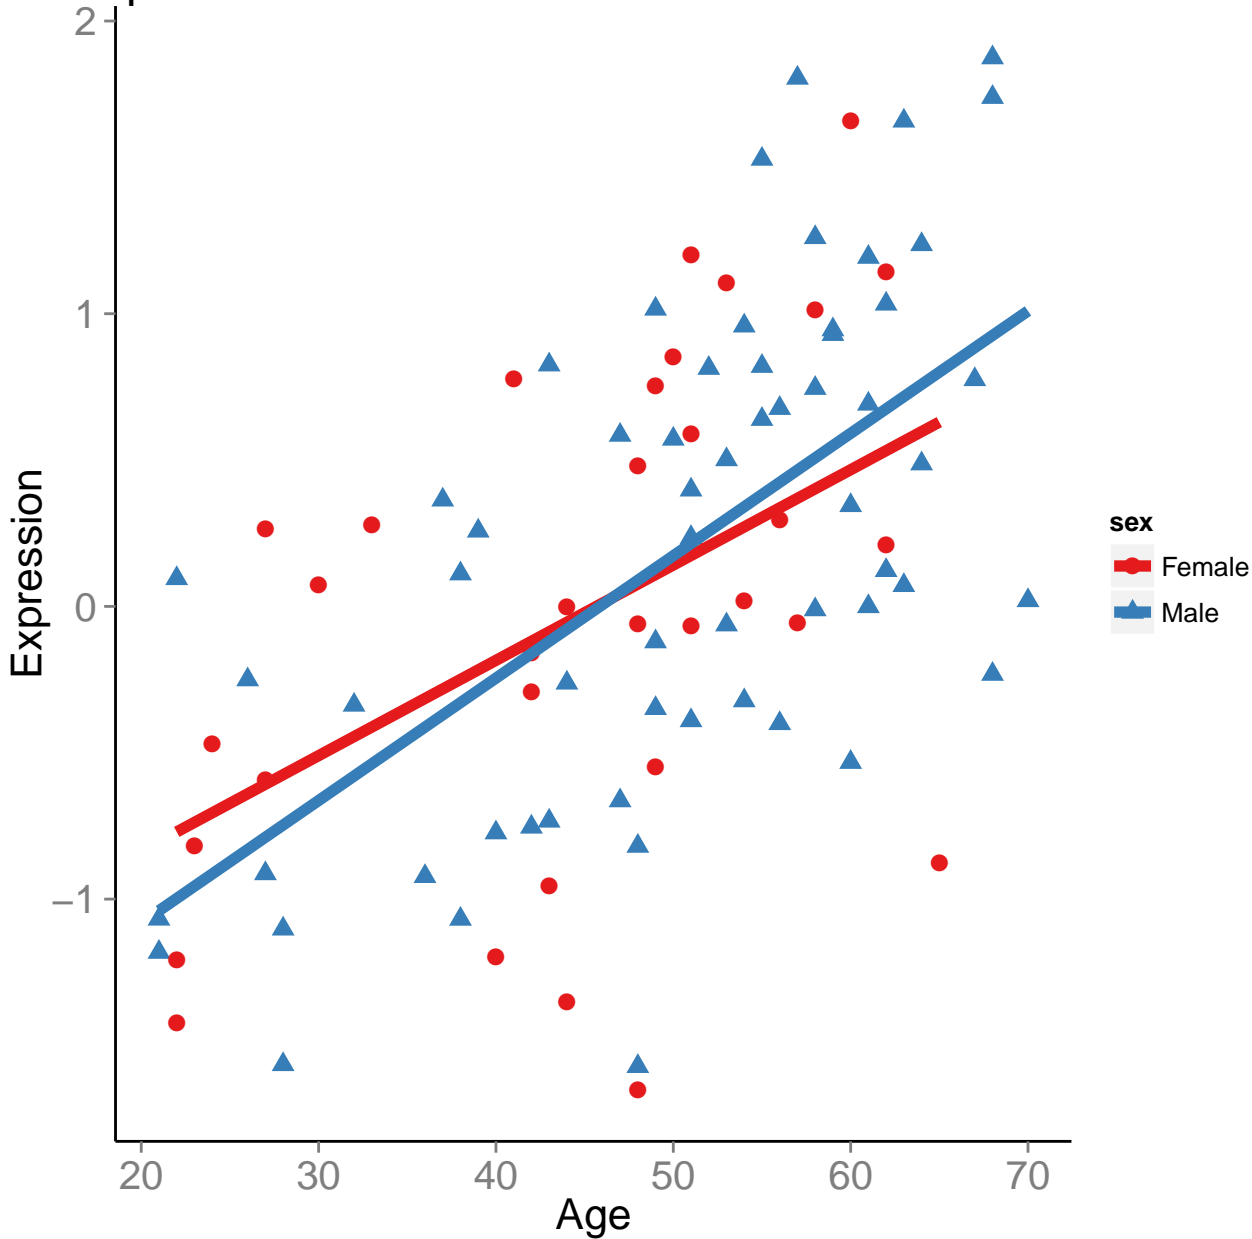

Adipose: EIF5AL1 Pearson-R=-0.57 Pval=2.89E-09

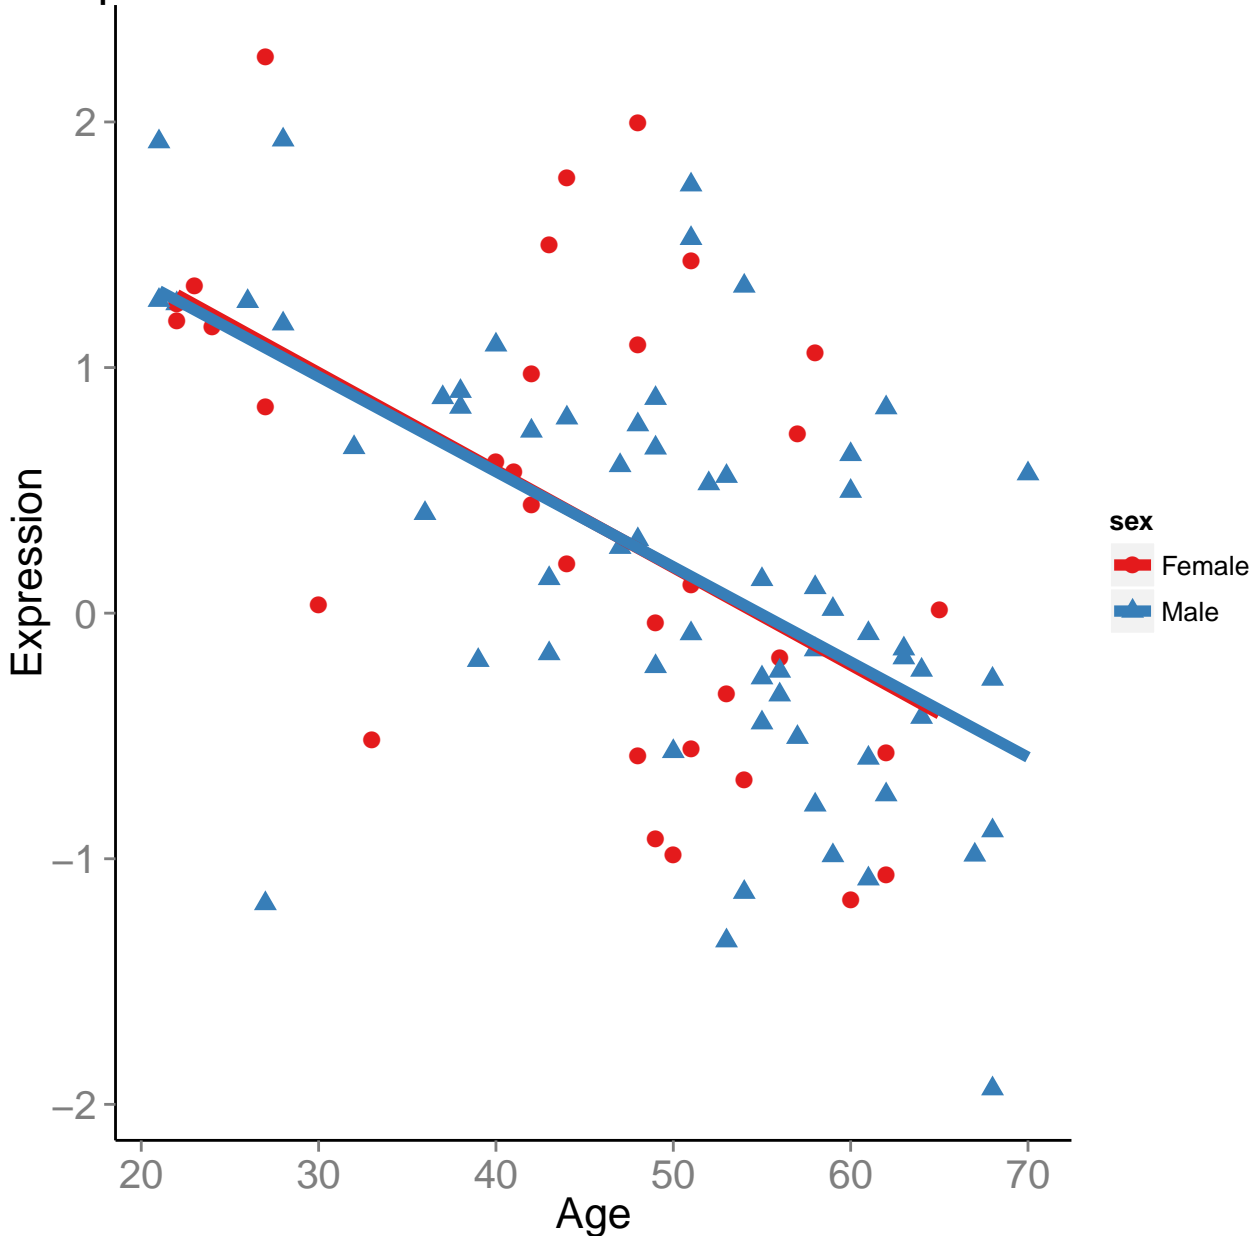

Adipose: FOXC1 Pearson-R=0.55 Pval=8.04E-09

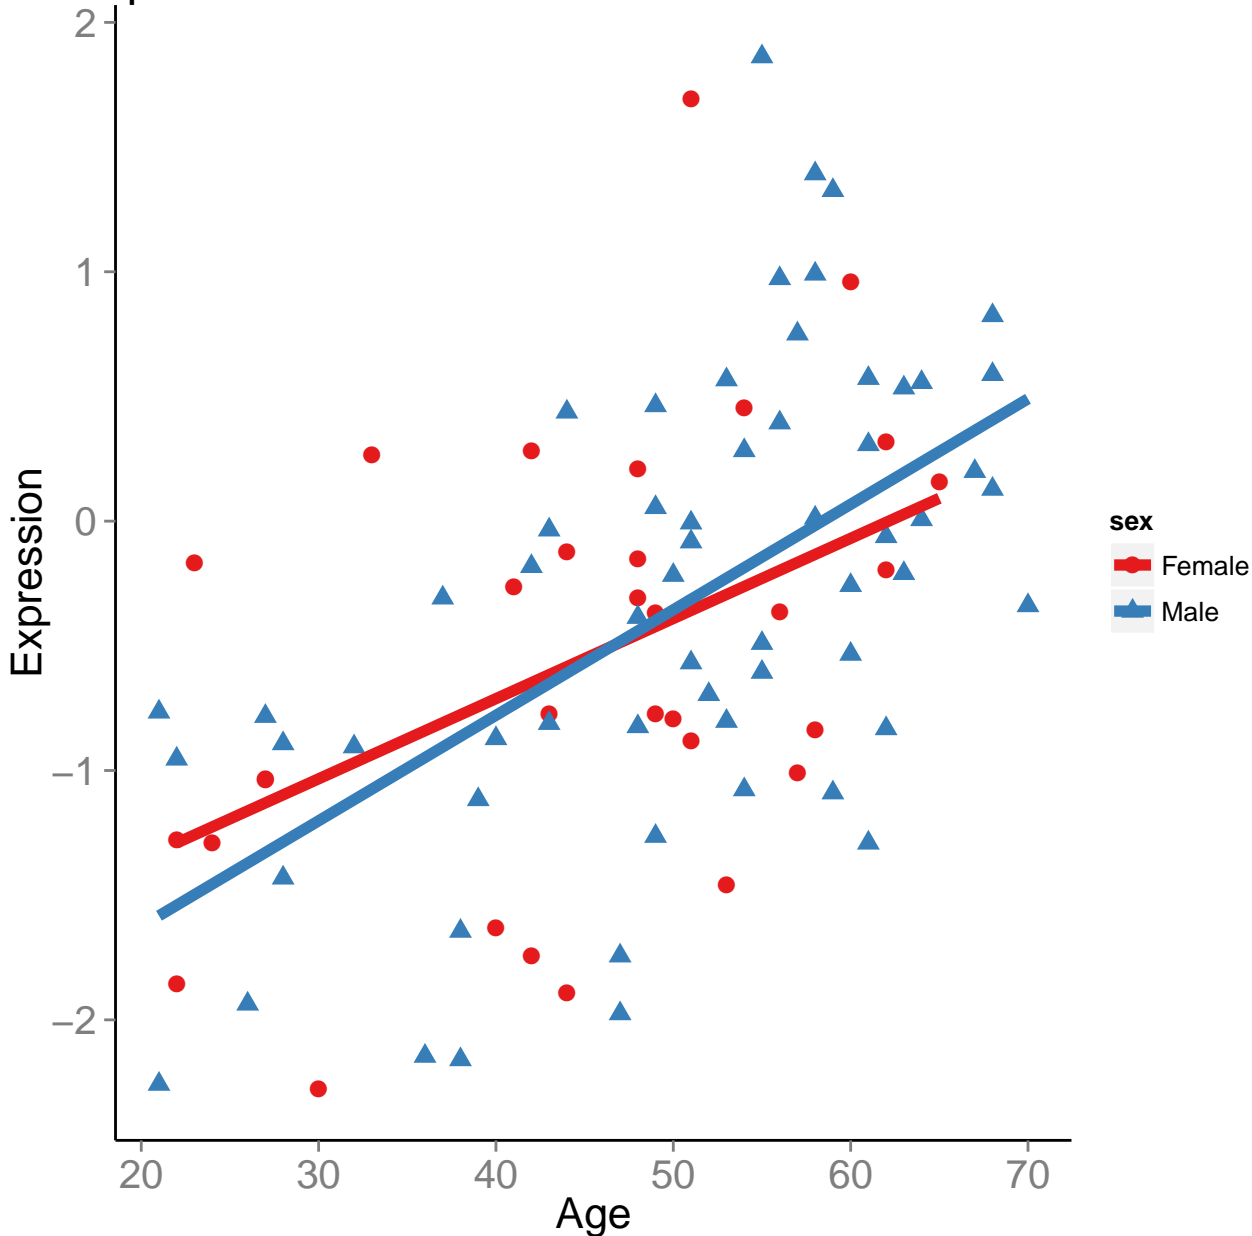

Adipose: WEE1 Pearson-R=0.55 Pval=9.87E-09

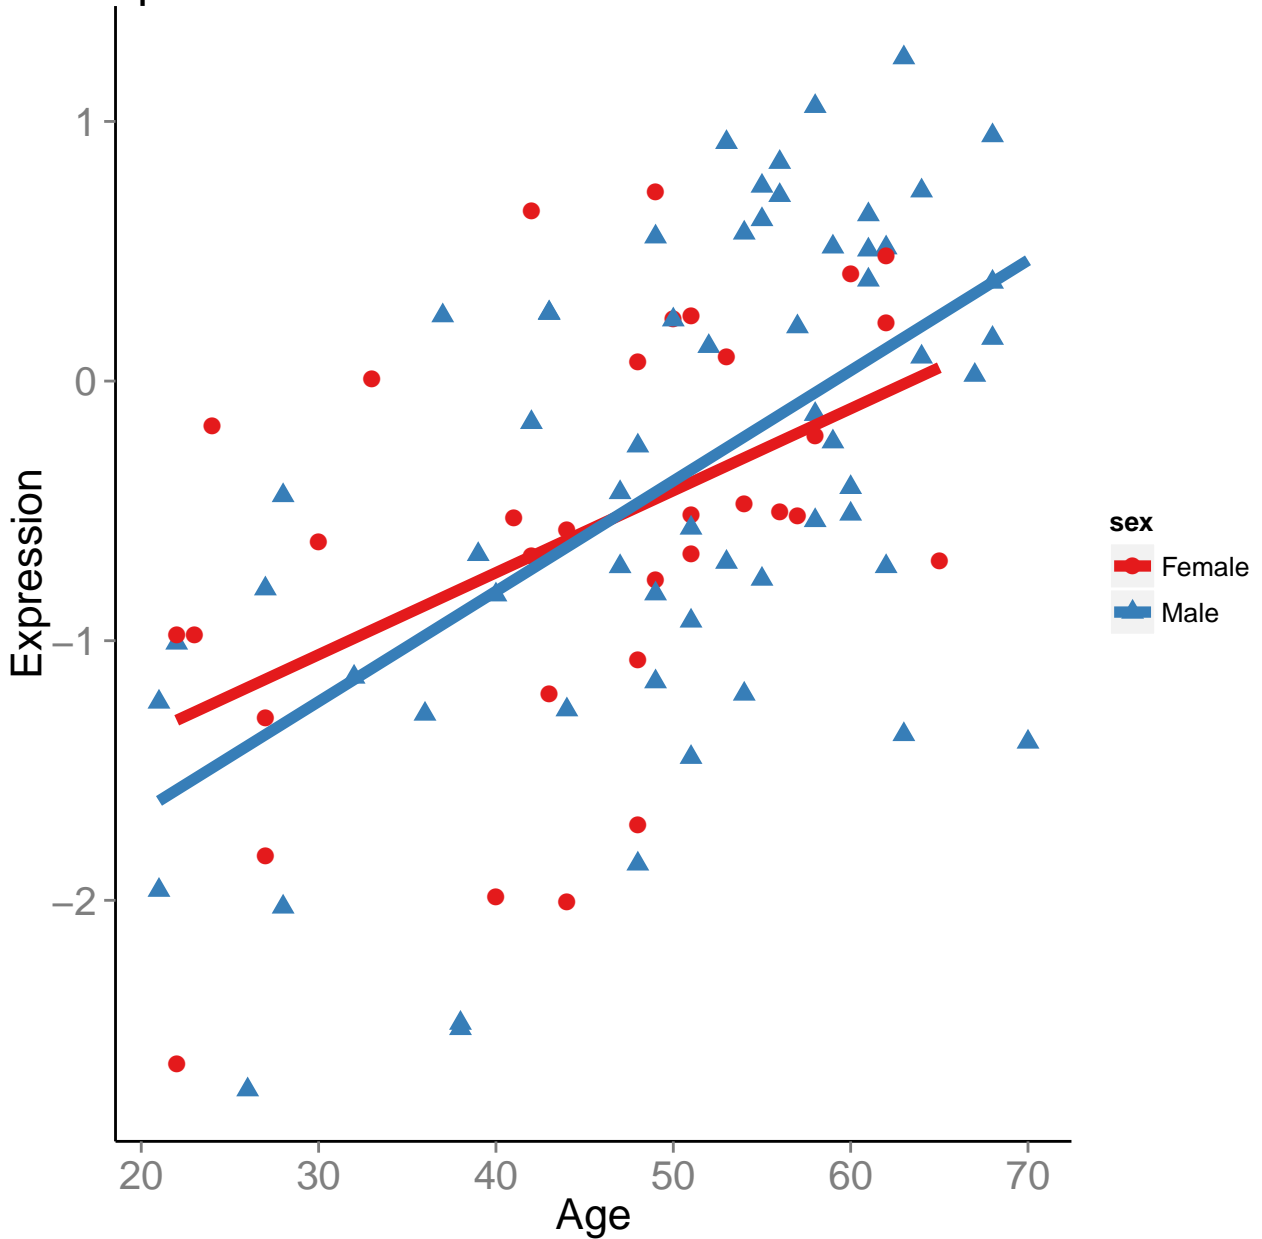

Adipose: TCEB3 Pearson-R=-0.55 Pval=1.23E-08

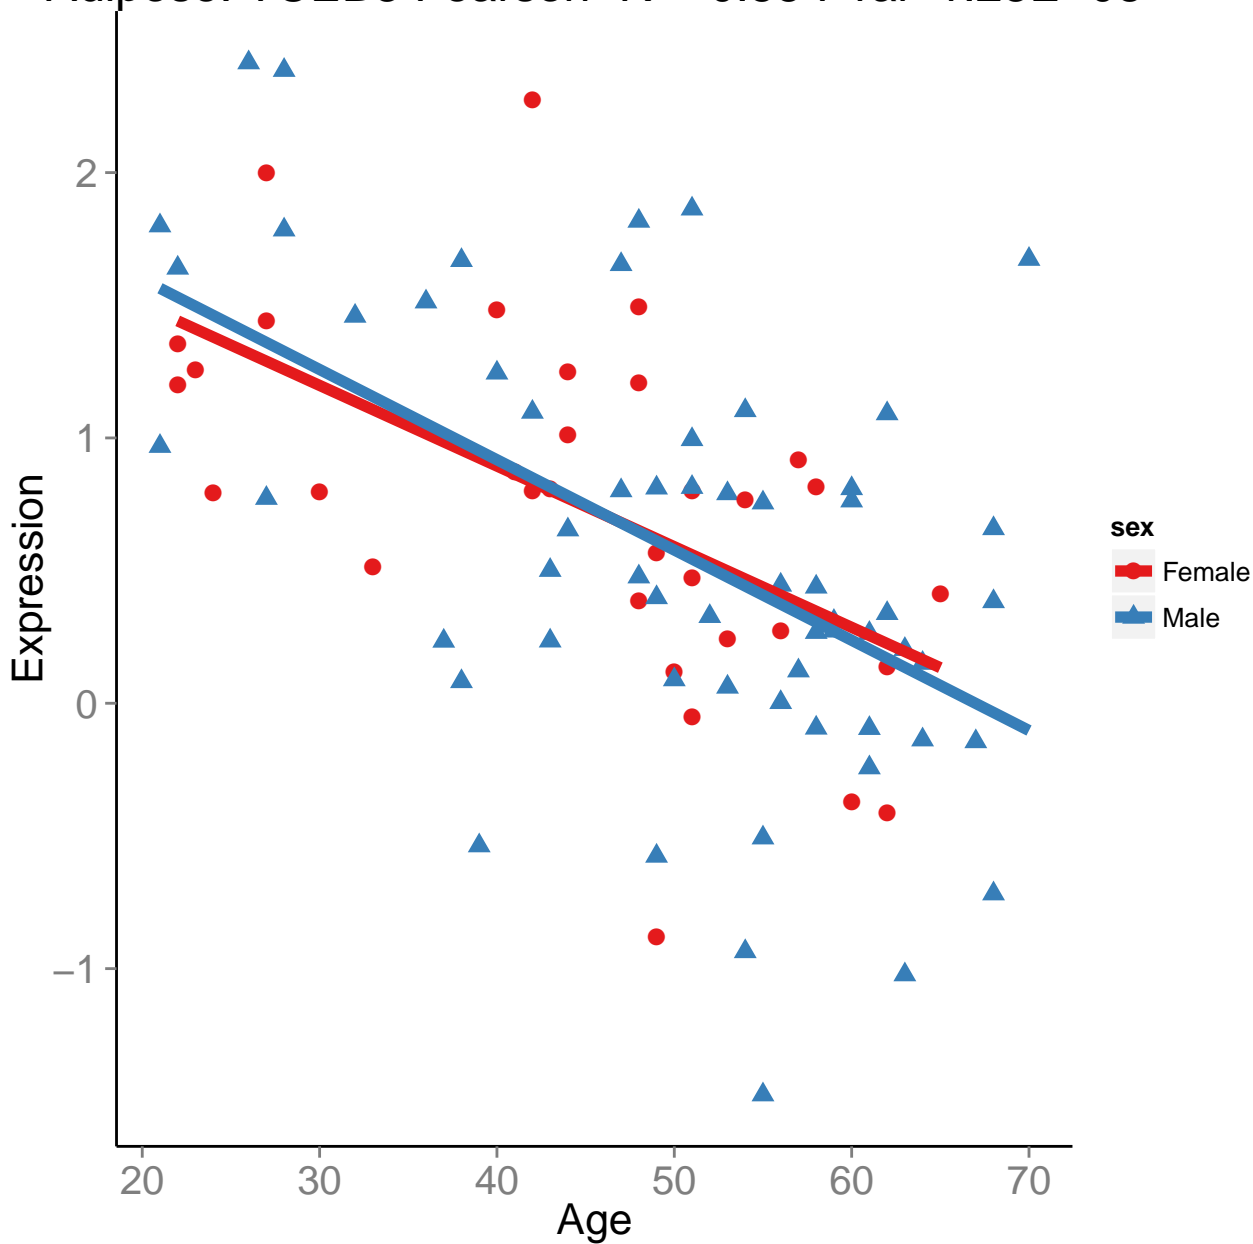



Adipose: PLEKHG6 Pearson-R=-0.54 Pval=2.40E-08

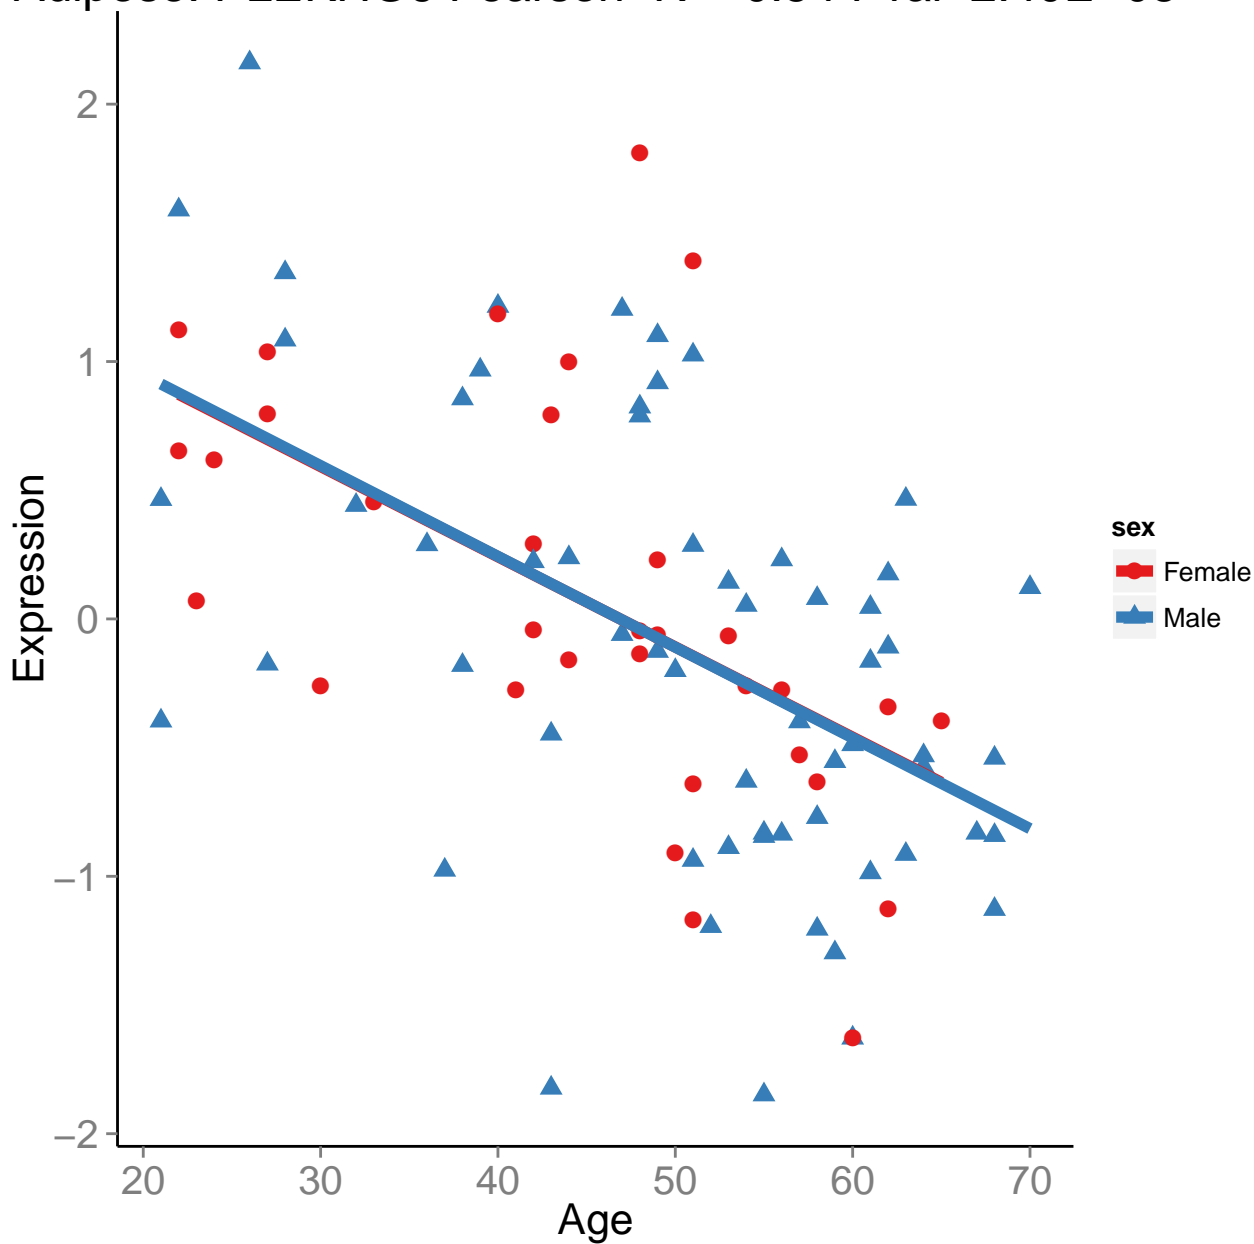

Adipose: RP11-315I20.3 Pearson-R=0.53 Pval=3.43E-08

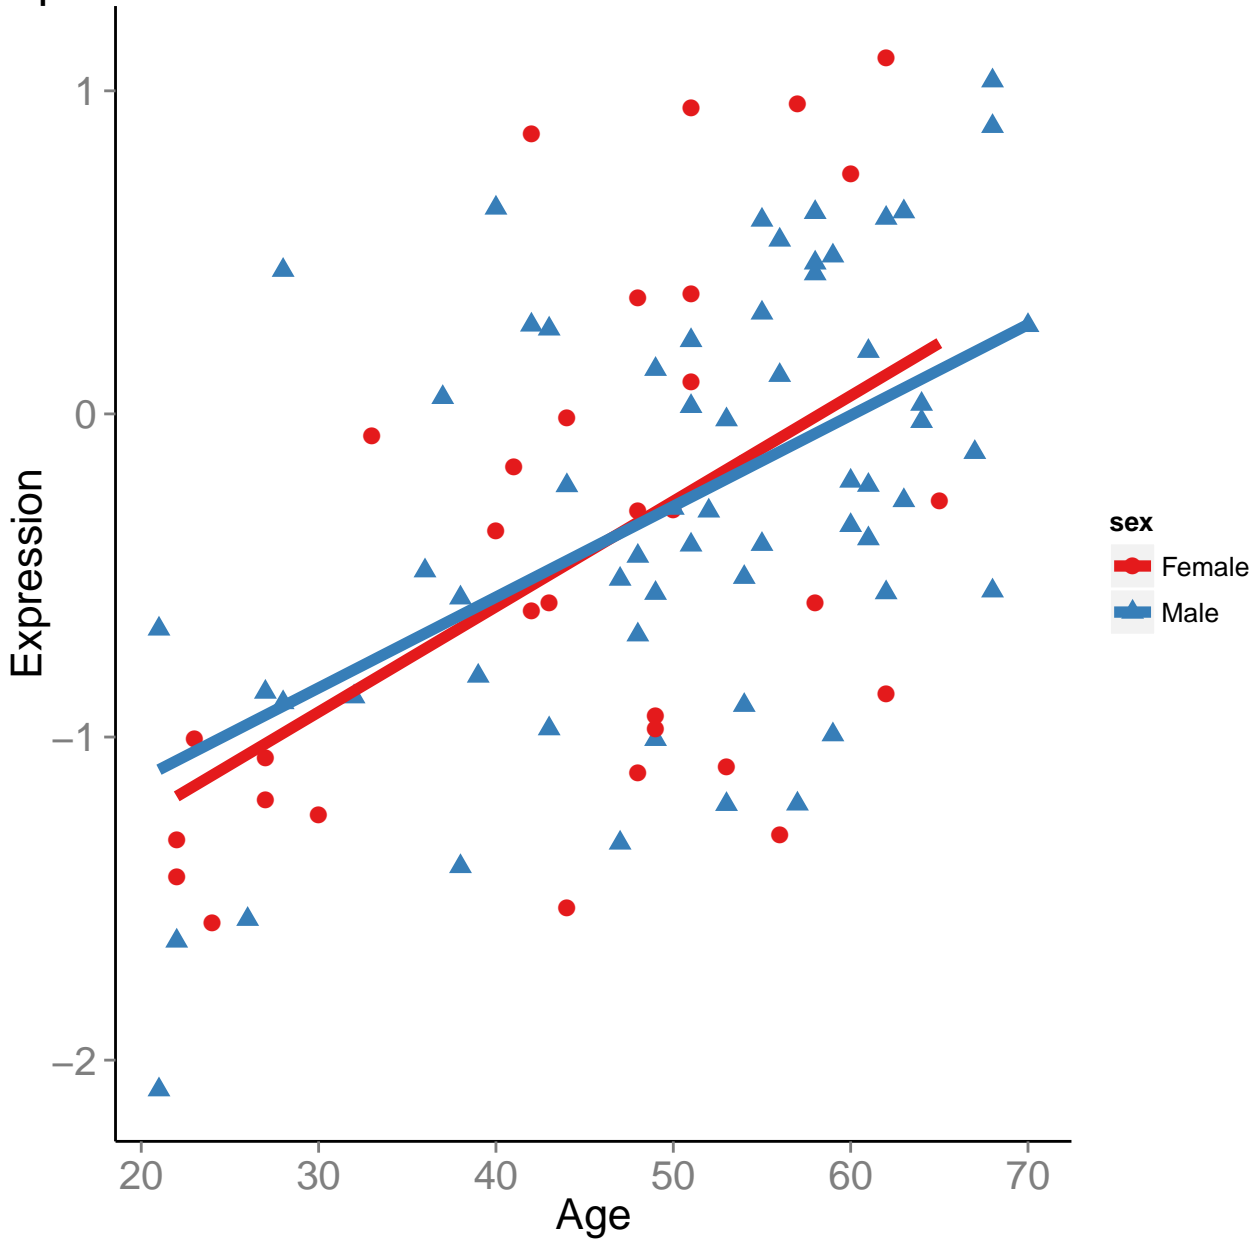

Adipose: GFPT1 Pearson-R=-0.53 Pval=4.18E-08

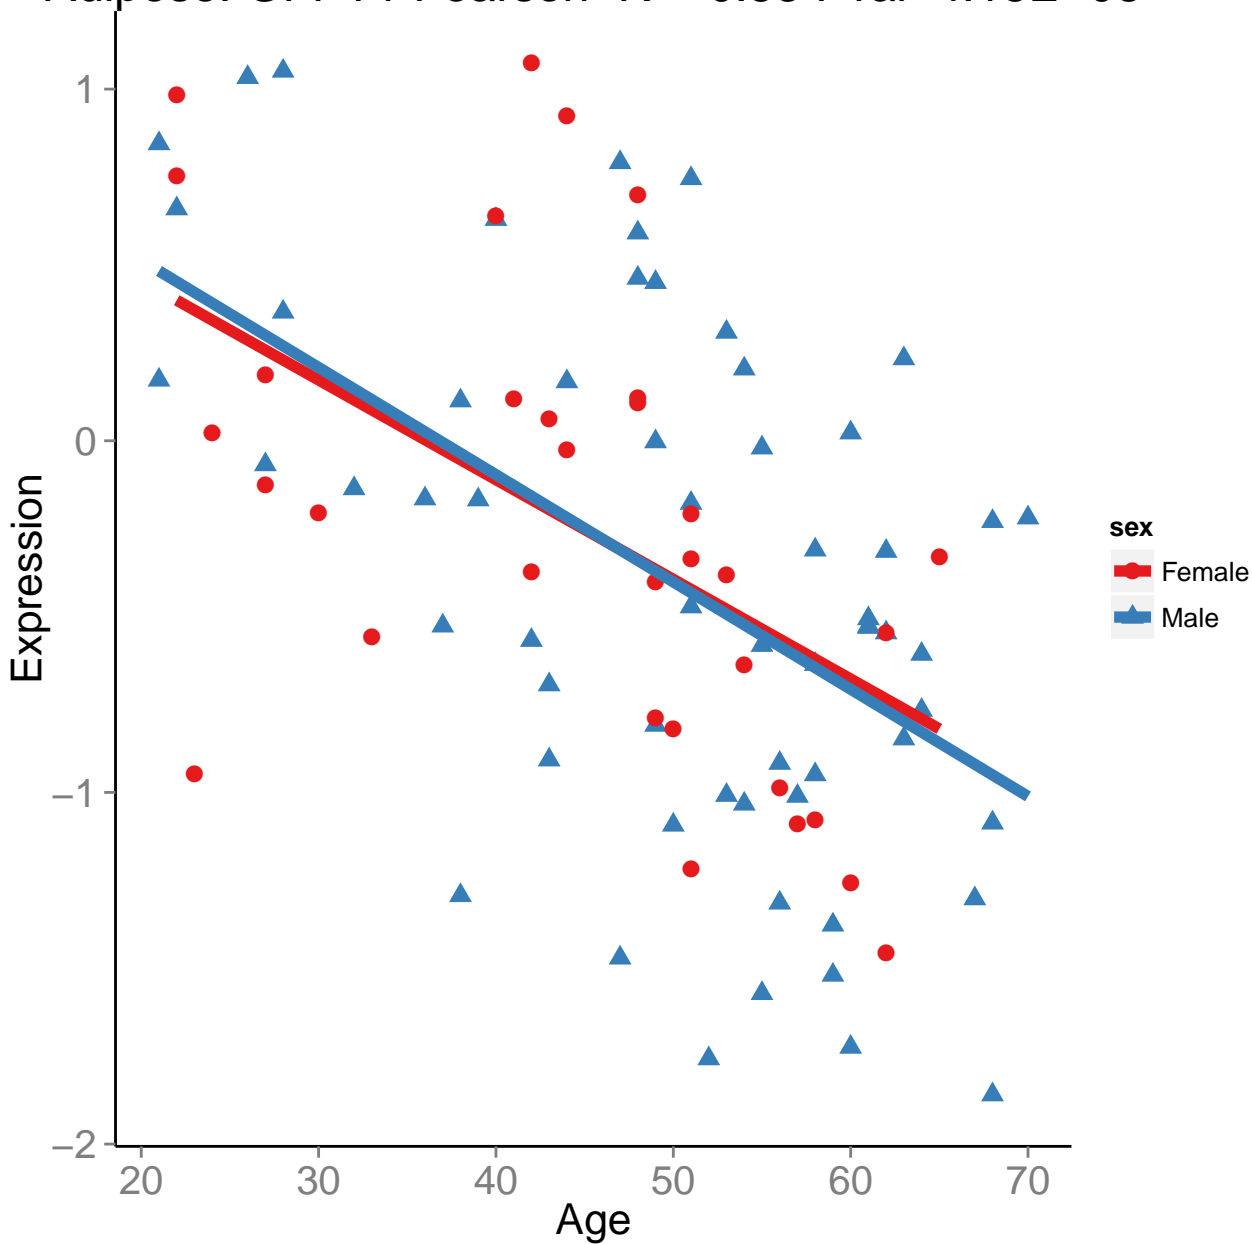

Adipose: CEP120 Pearson-R=0.53 Pval=5.27E-08

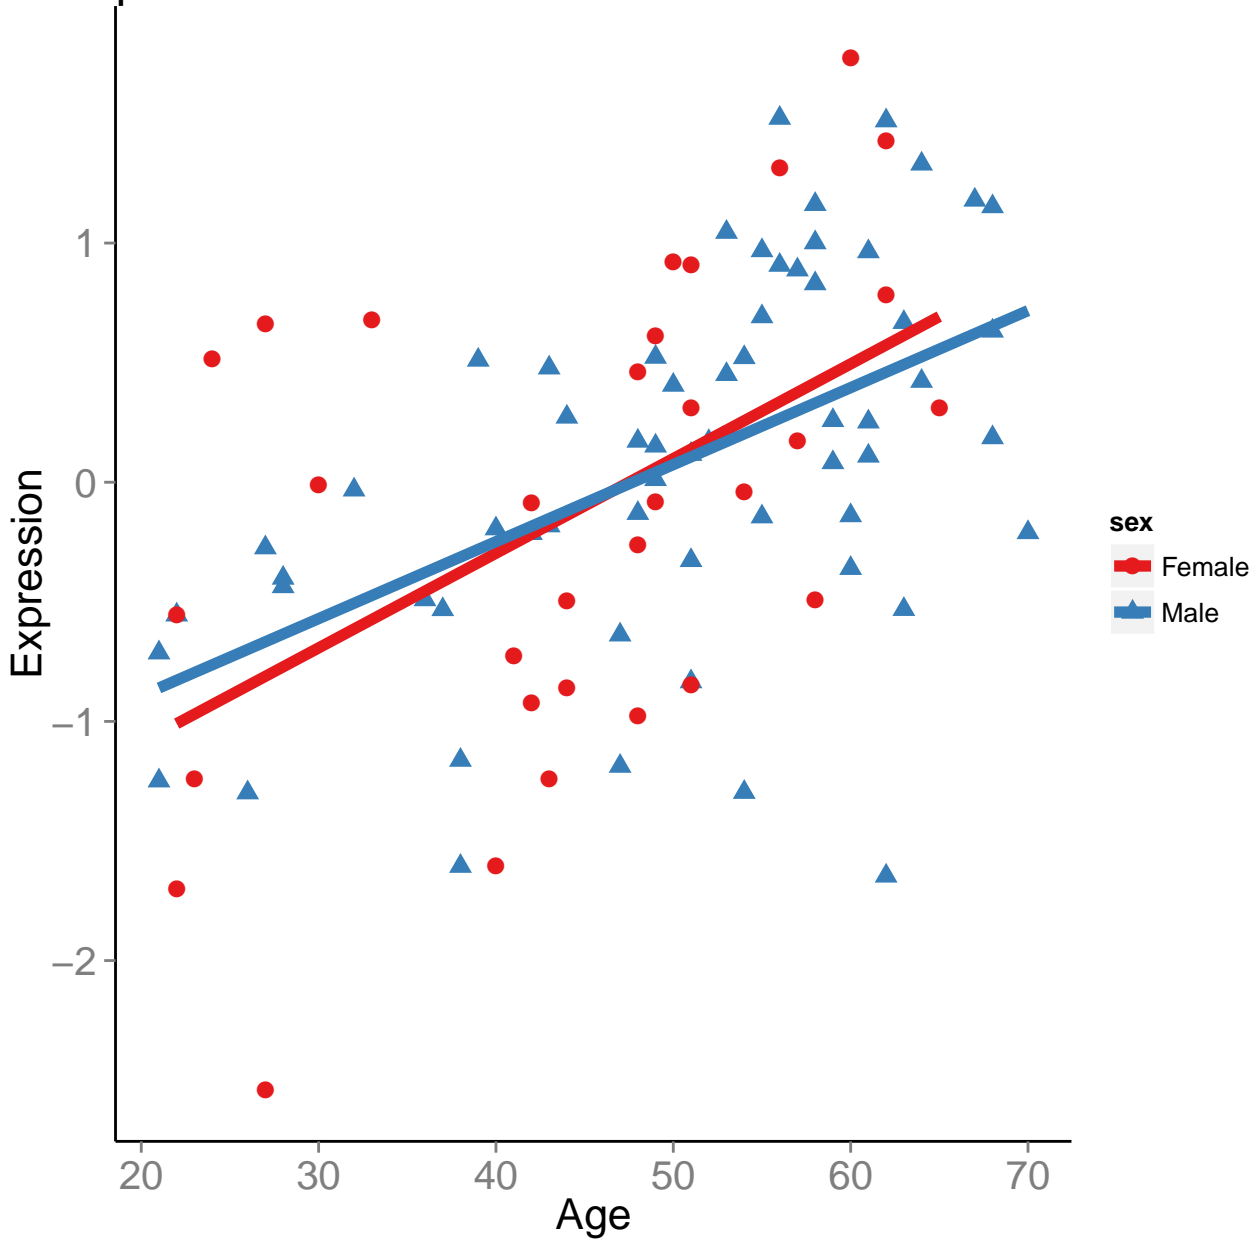

Adipose: JUN Pearson-R=0.52 Pval=8.81E-08

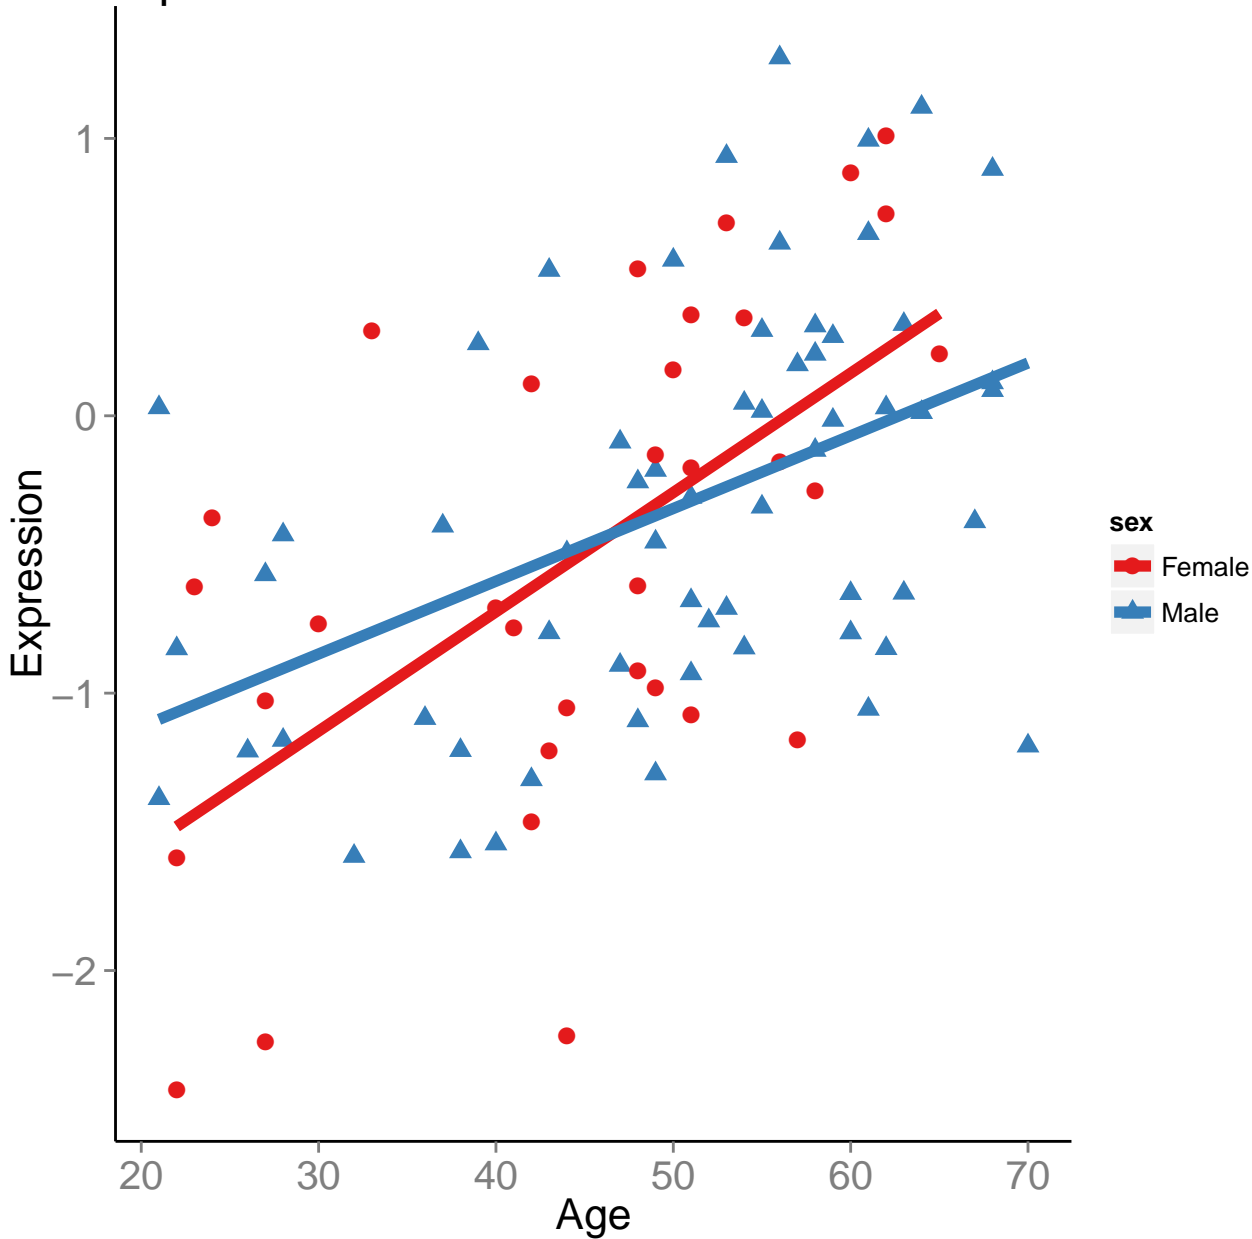

Adipose: DTX4 Pearson-R=-0.52 Pval=9.22E-08

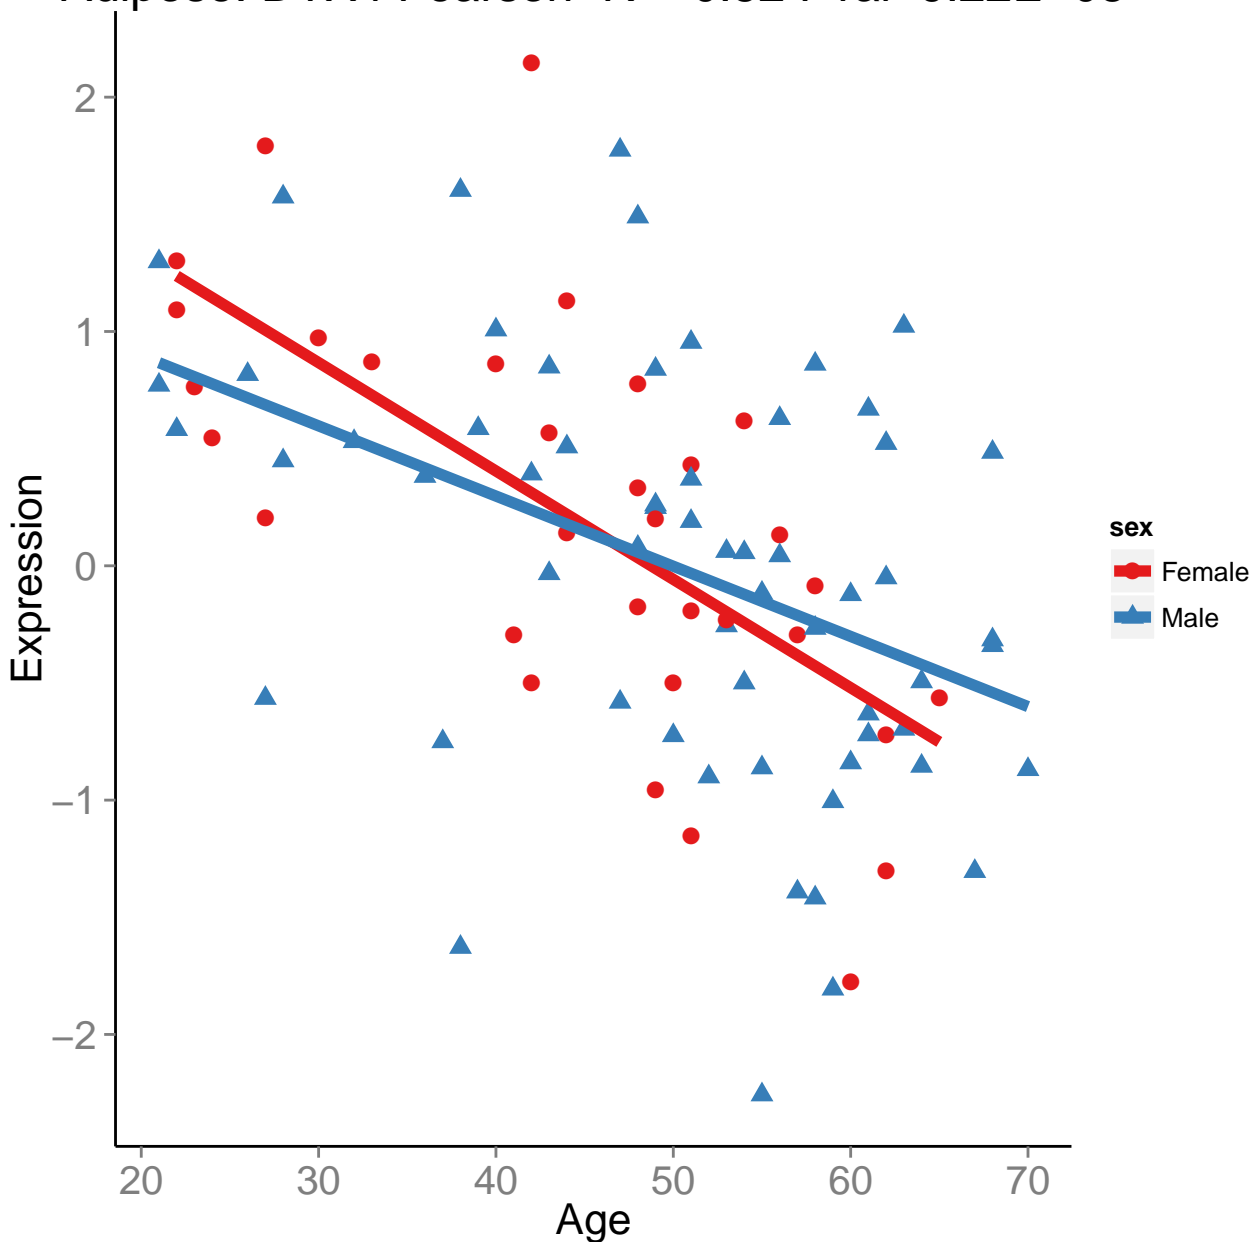

Adipose: UBC Pearson-R=0.52 Pval=9.19E-08

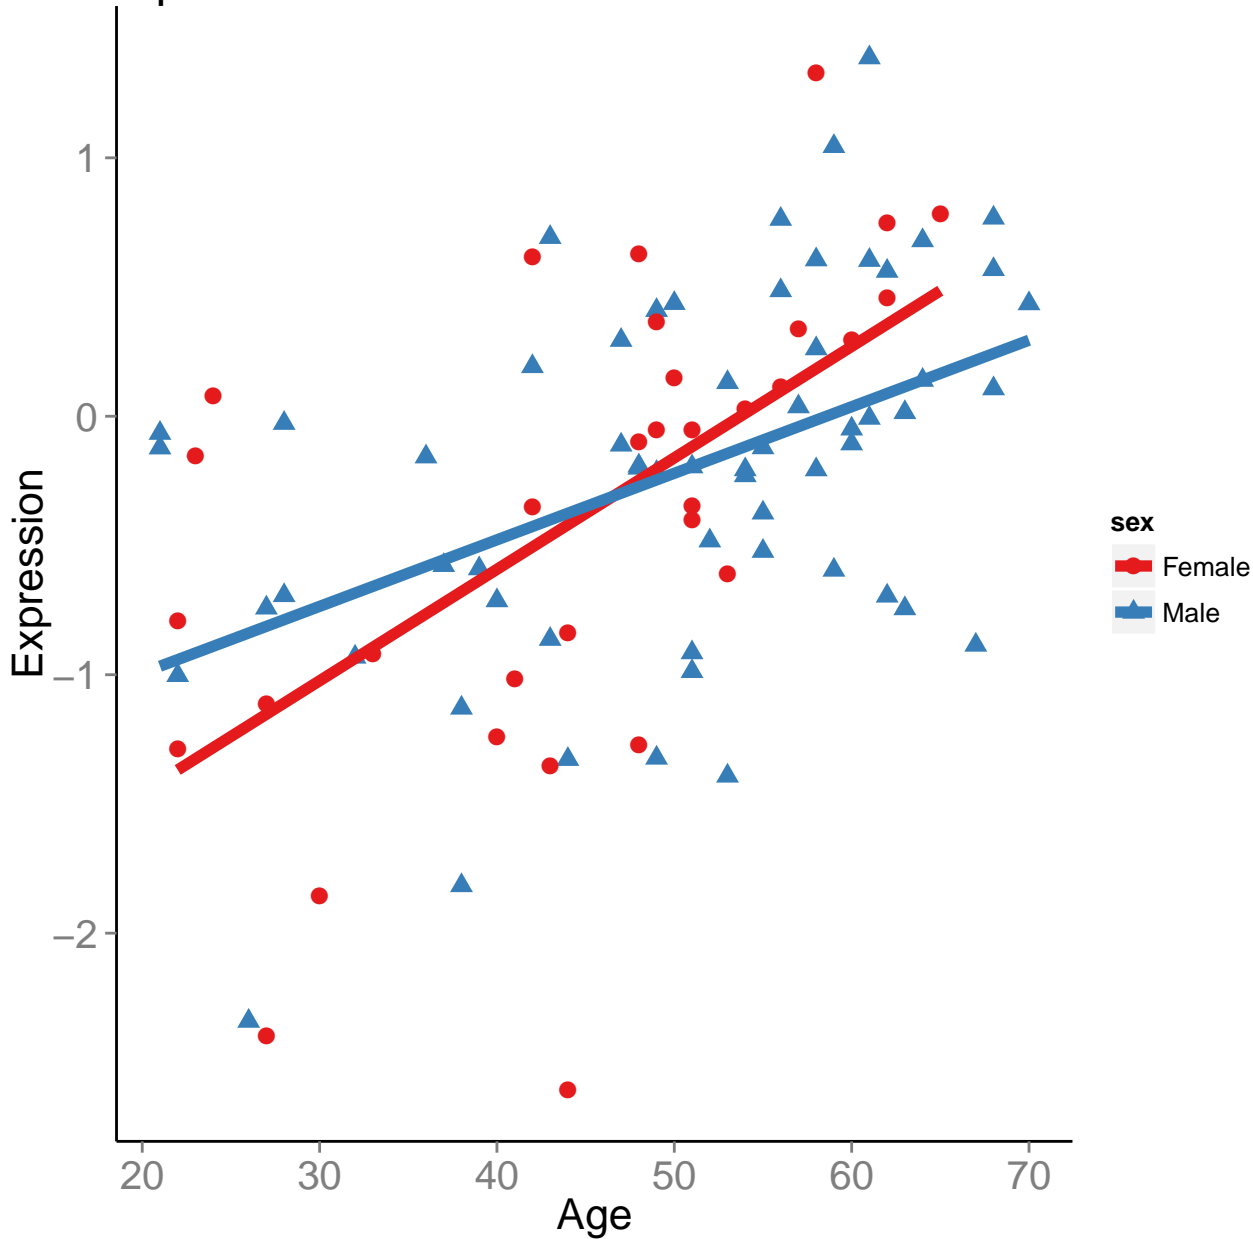

Adipose: LMO3 Pearson-R=0.51 Pval=1.22E-07

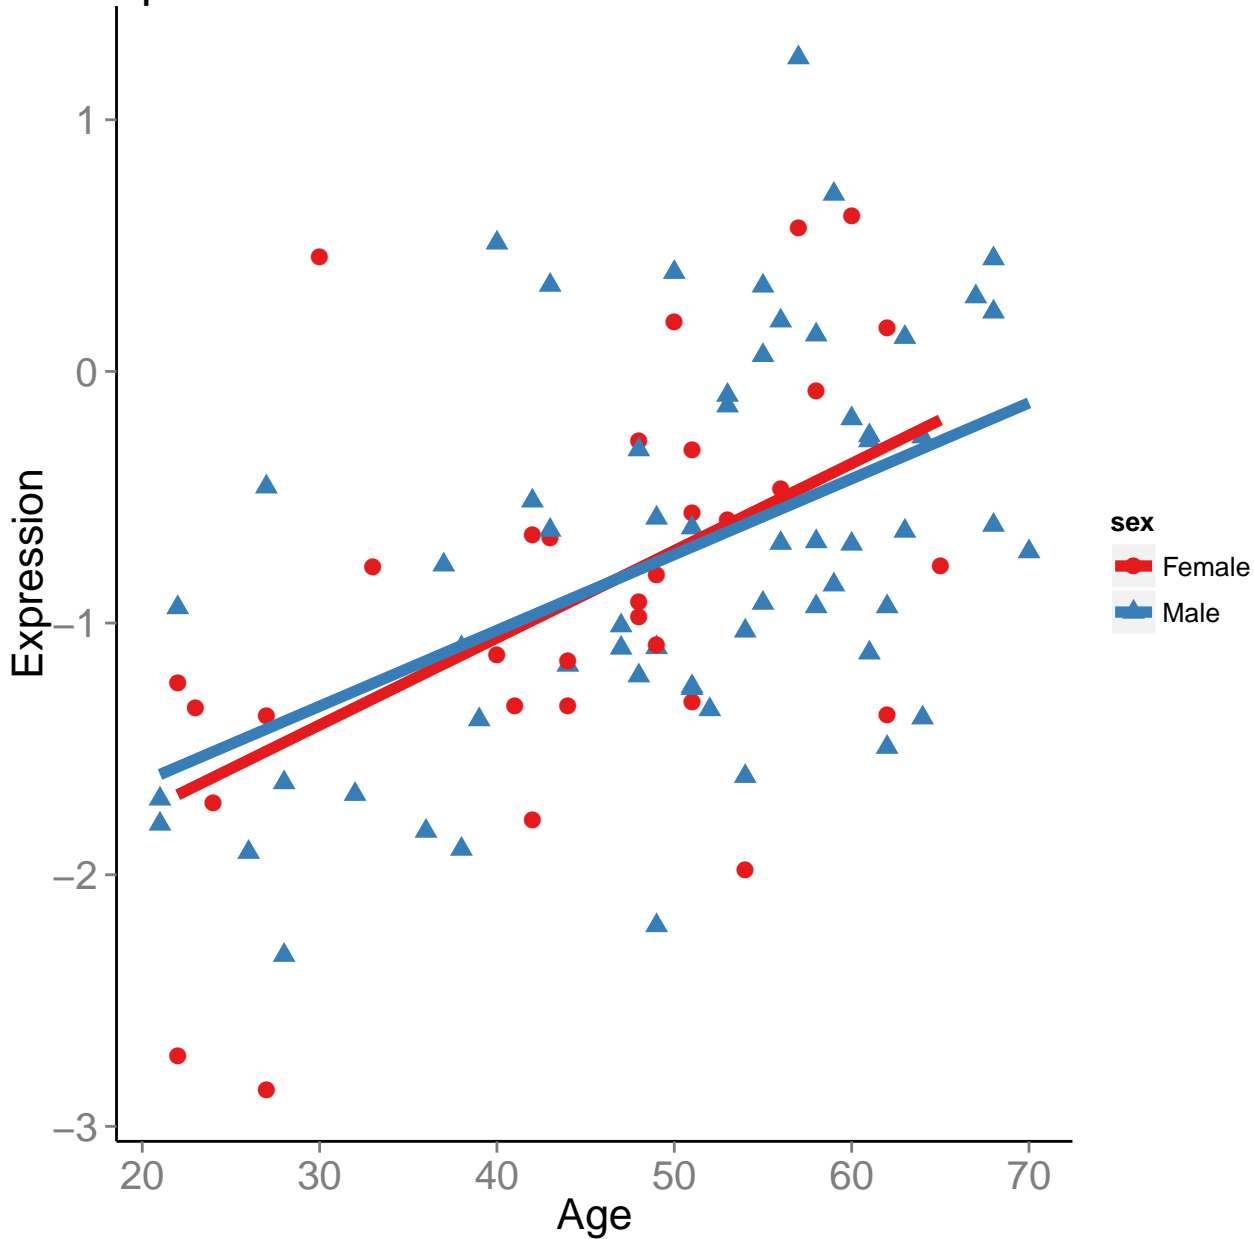



Adipose: ZNF136 Pearson-R=0.51 Pval=1.46E-07

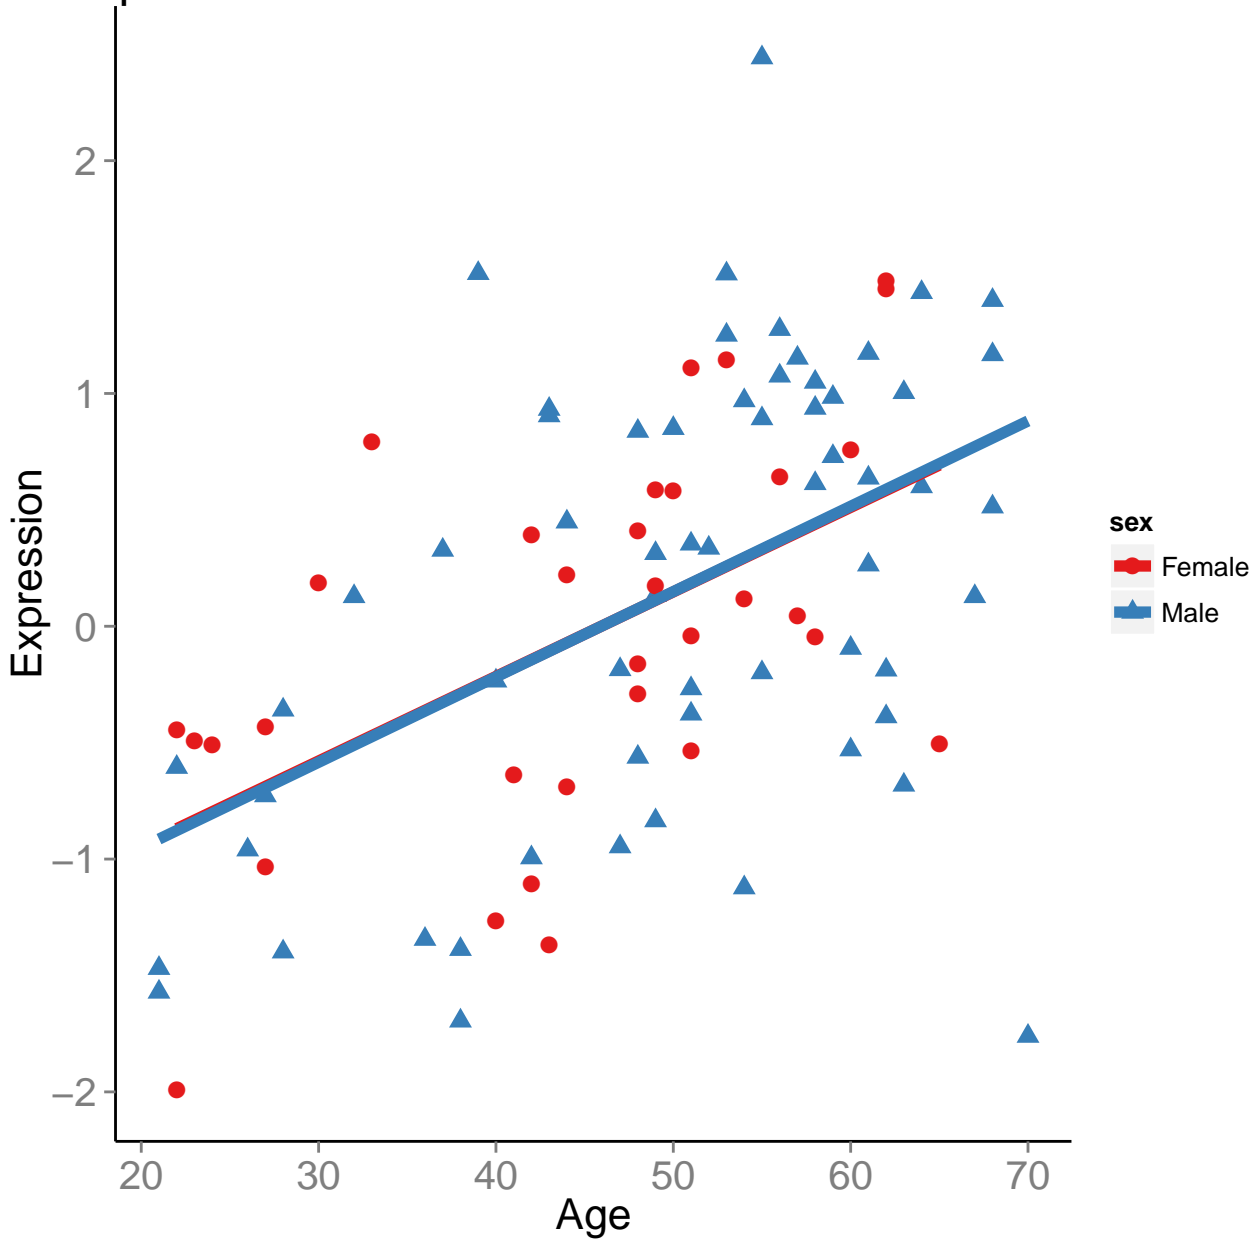

Adipose: IRF2BP2 Pearson-R=0.51 Pval=1.37E-07

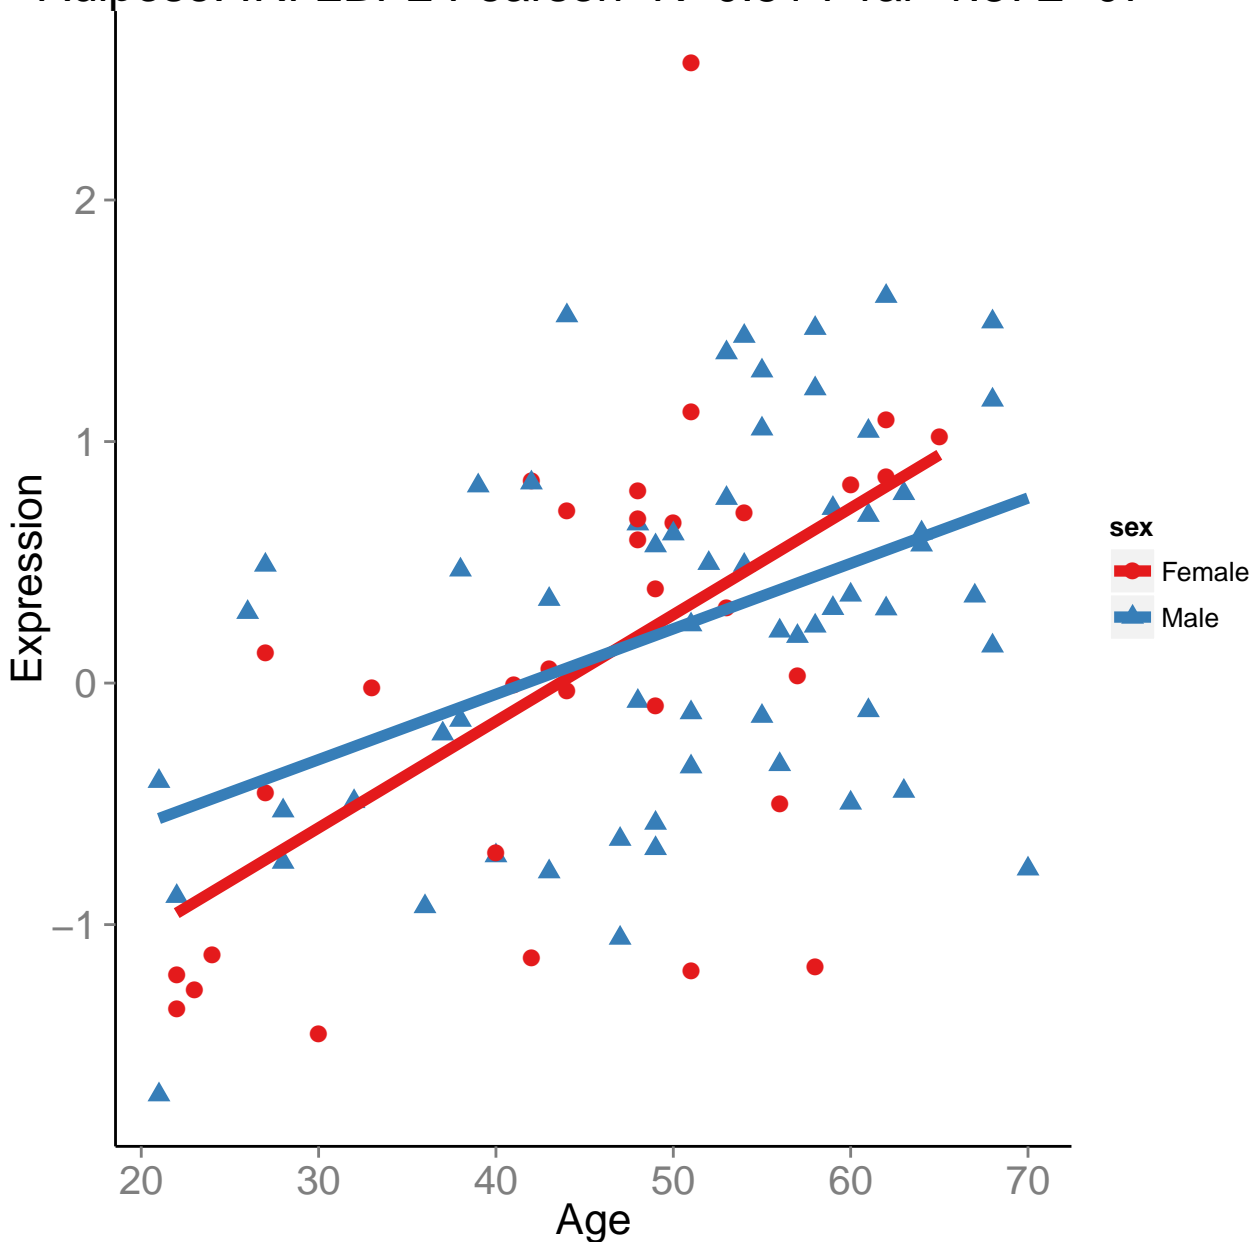

Adipose: CLEC2D Pearson-R=0.50 Pval=2.21E-07

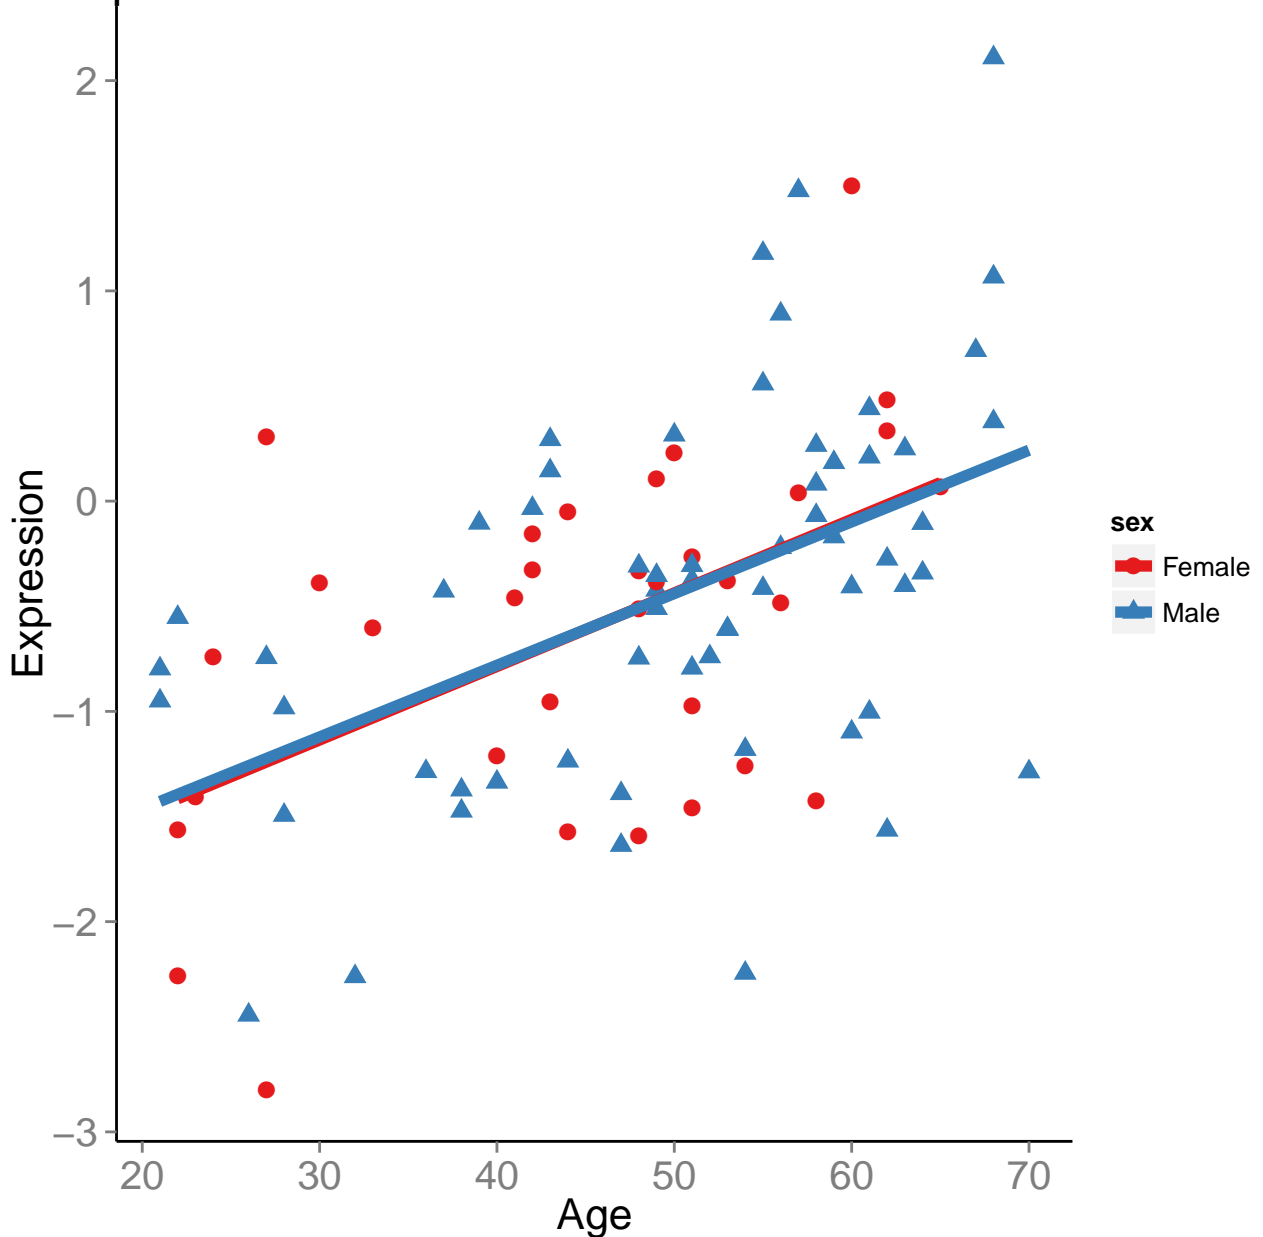

Adipose: COL4A1 Pearson-R=-0.50 Pval=2.21E-07

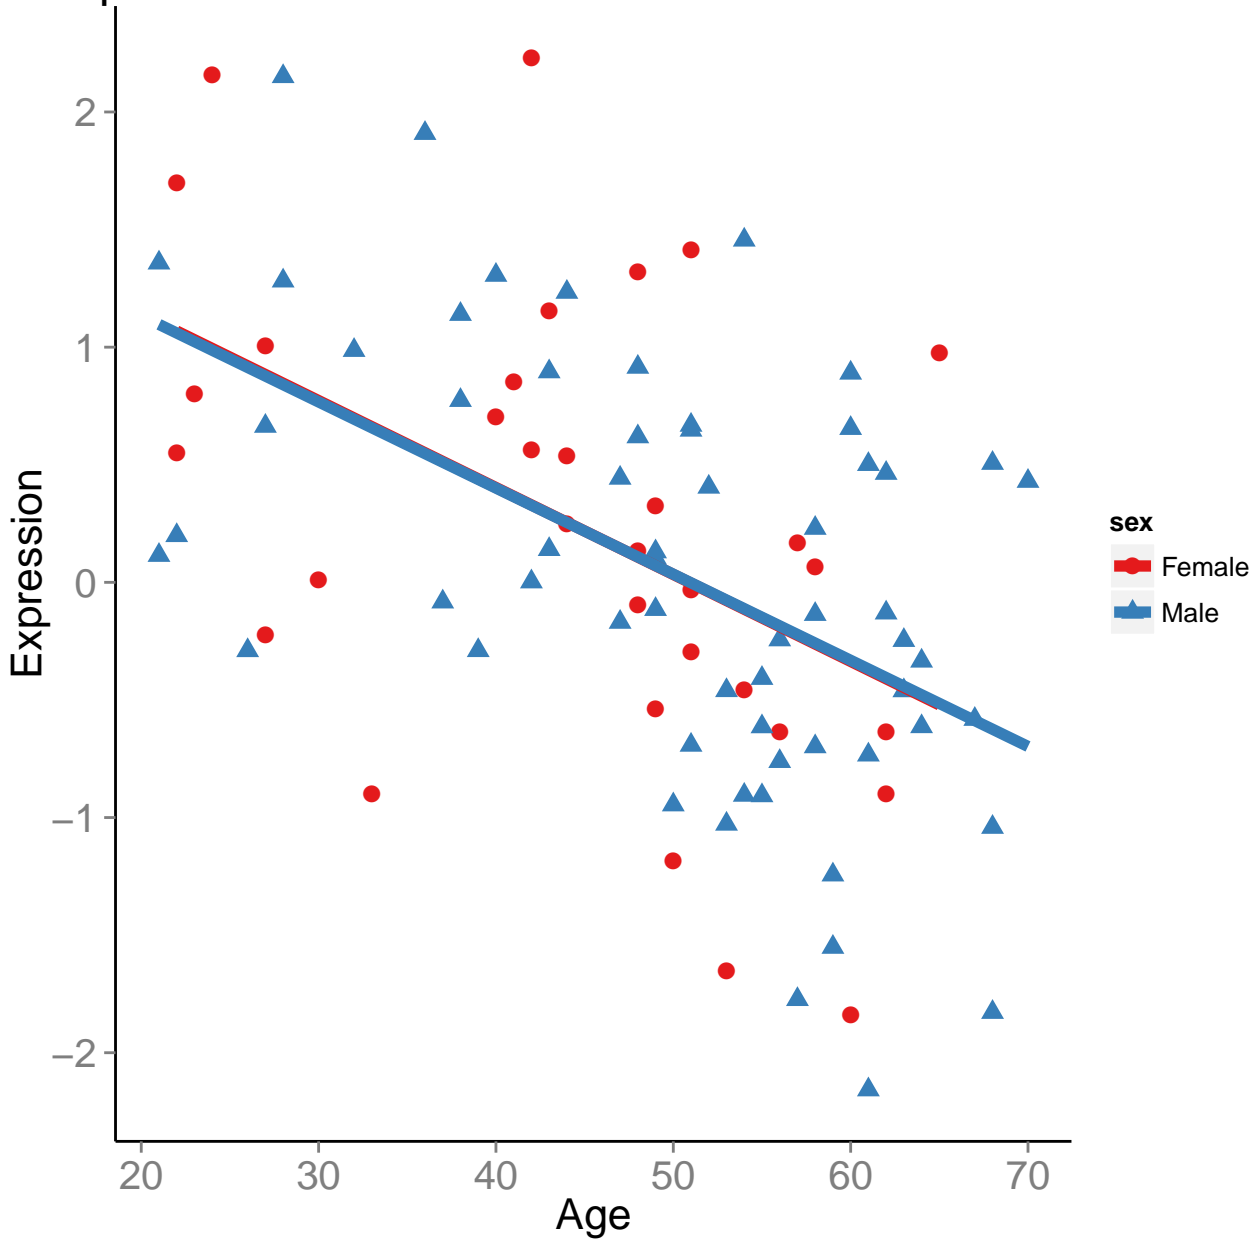

Adipose: PBX3 Pearson-R=0.51 Pval=1.95E-07

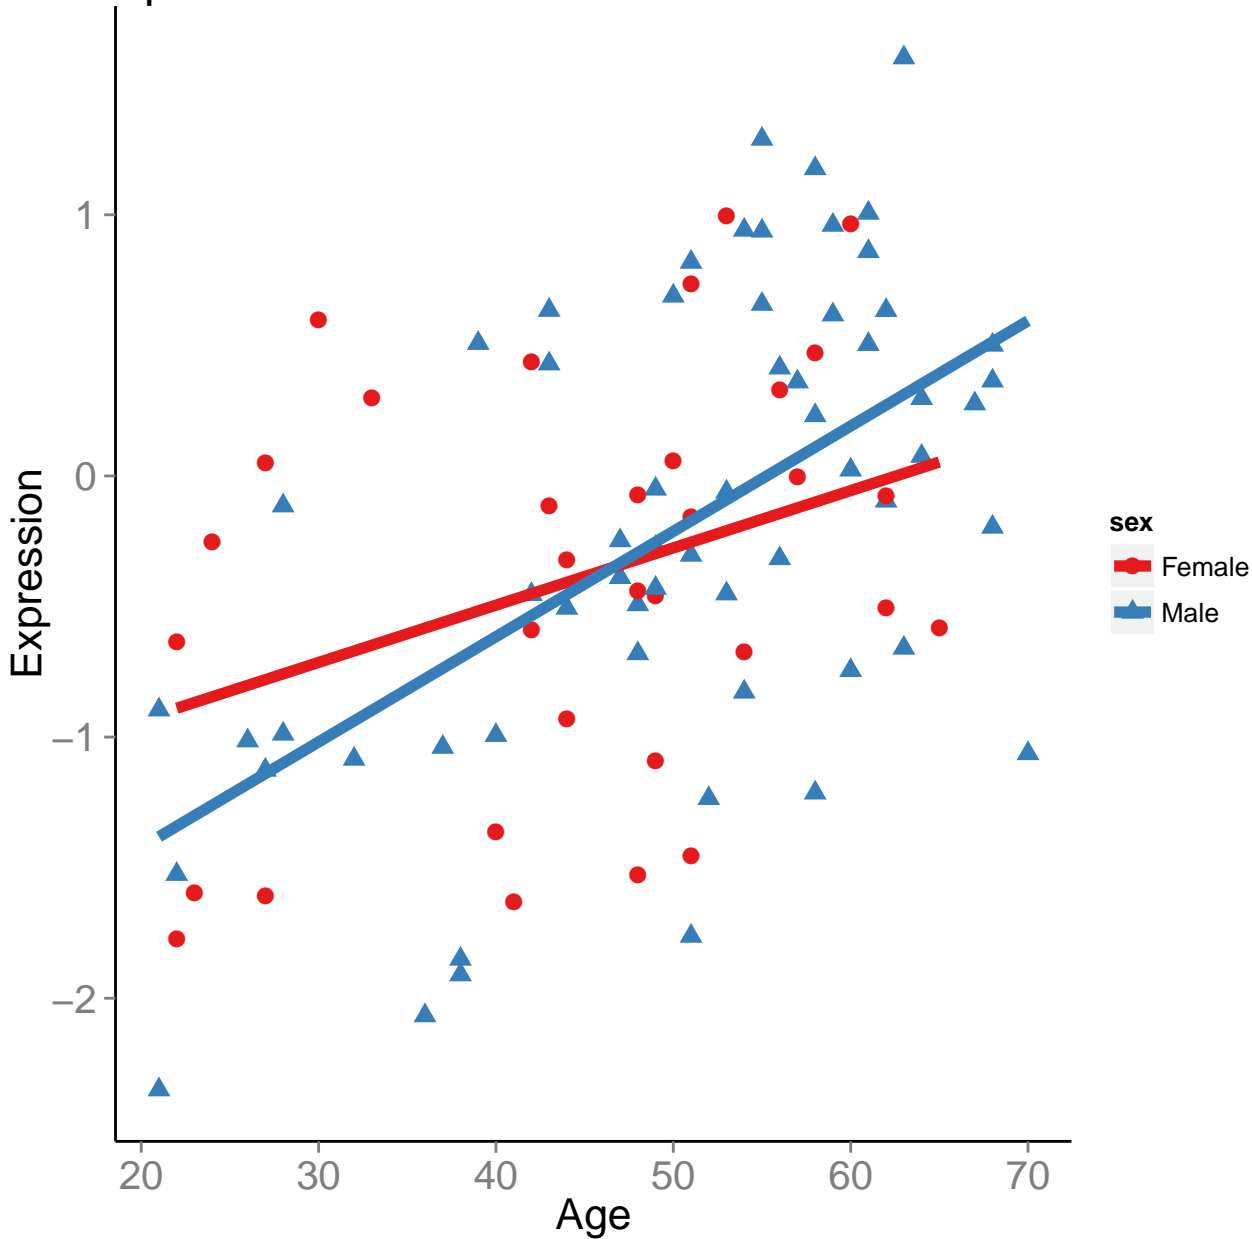

Adipose: ATP5G3 Pearson-R=-0.51 Pval=1.91E-07

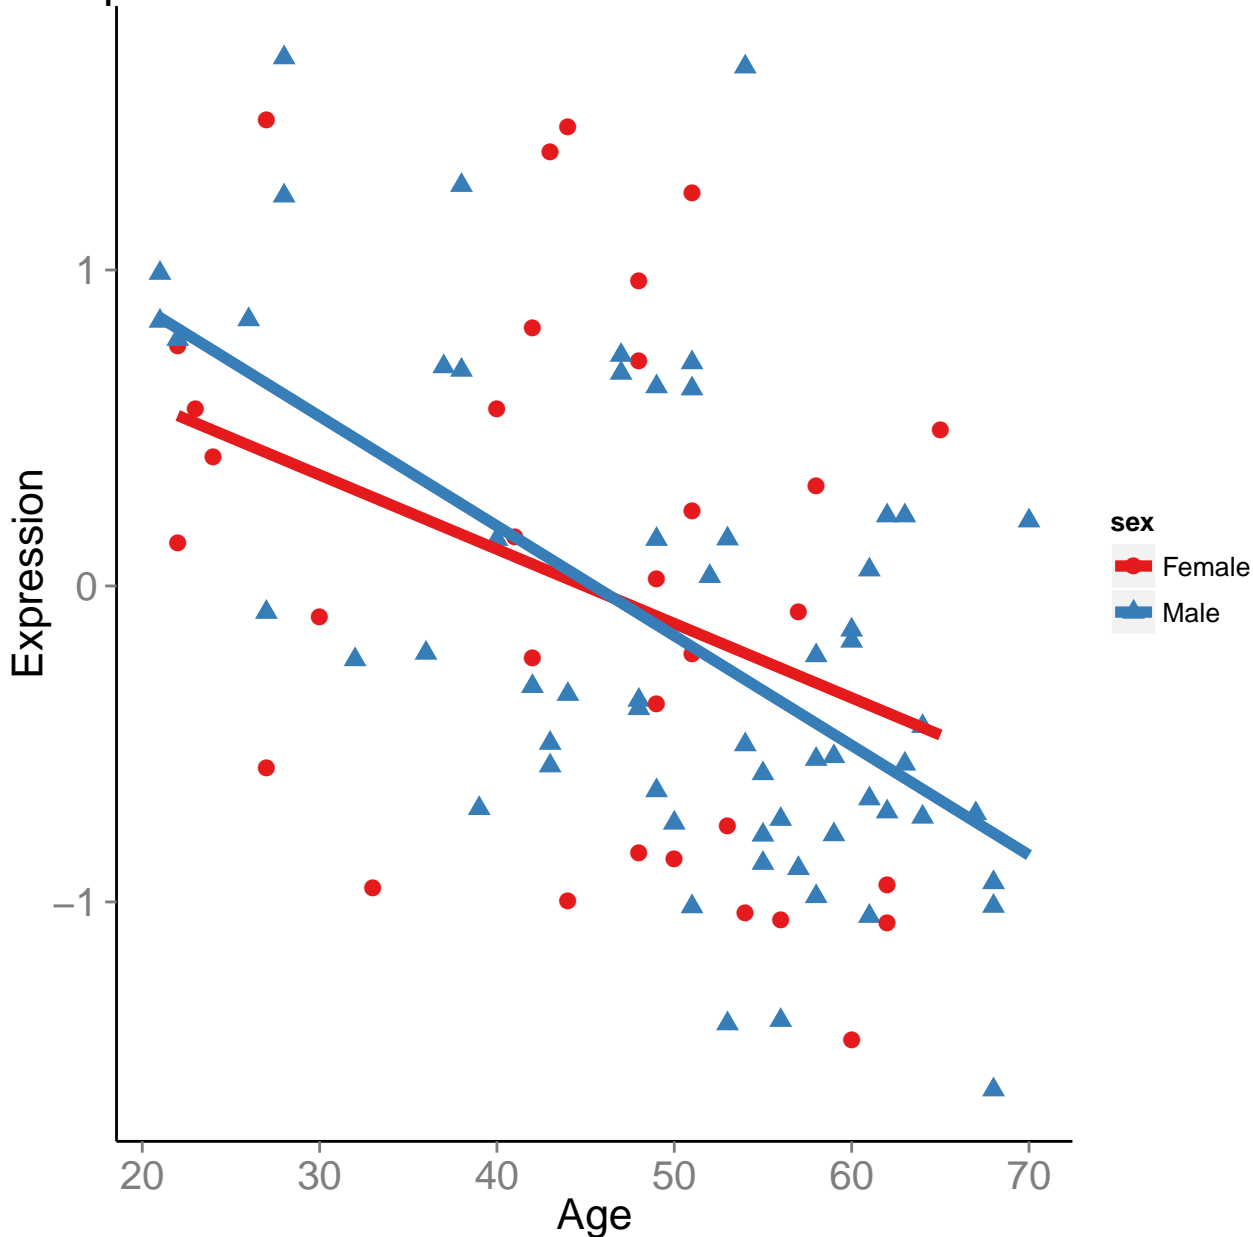

Adipose: DDB2 Pearson-R=0.50 Pval=2.63E-07

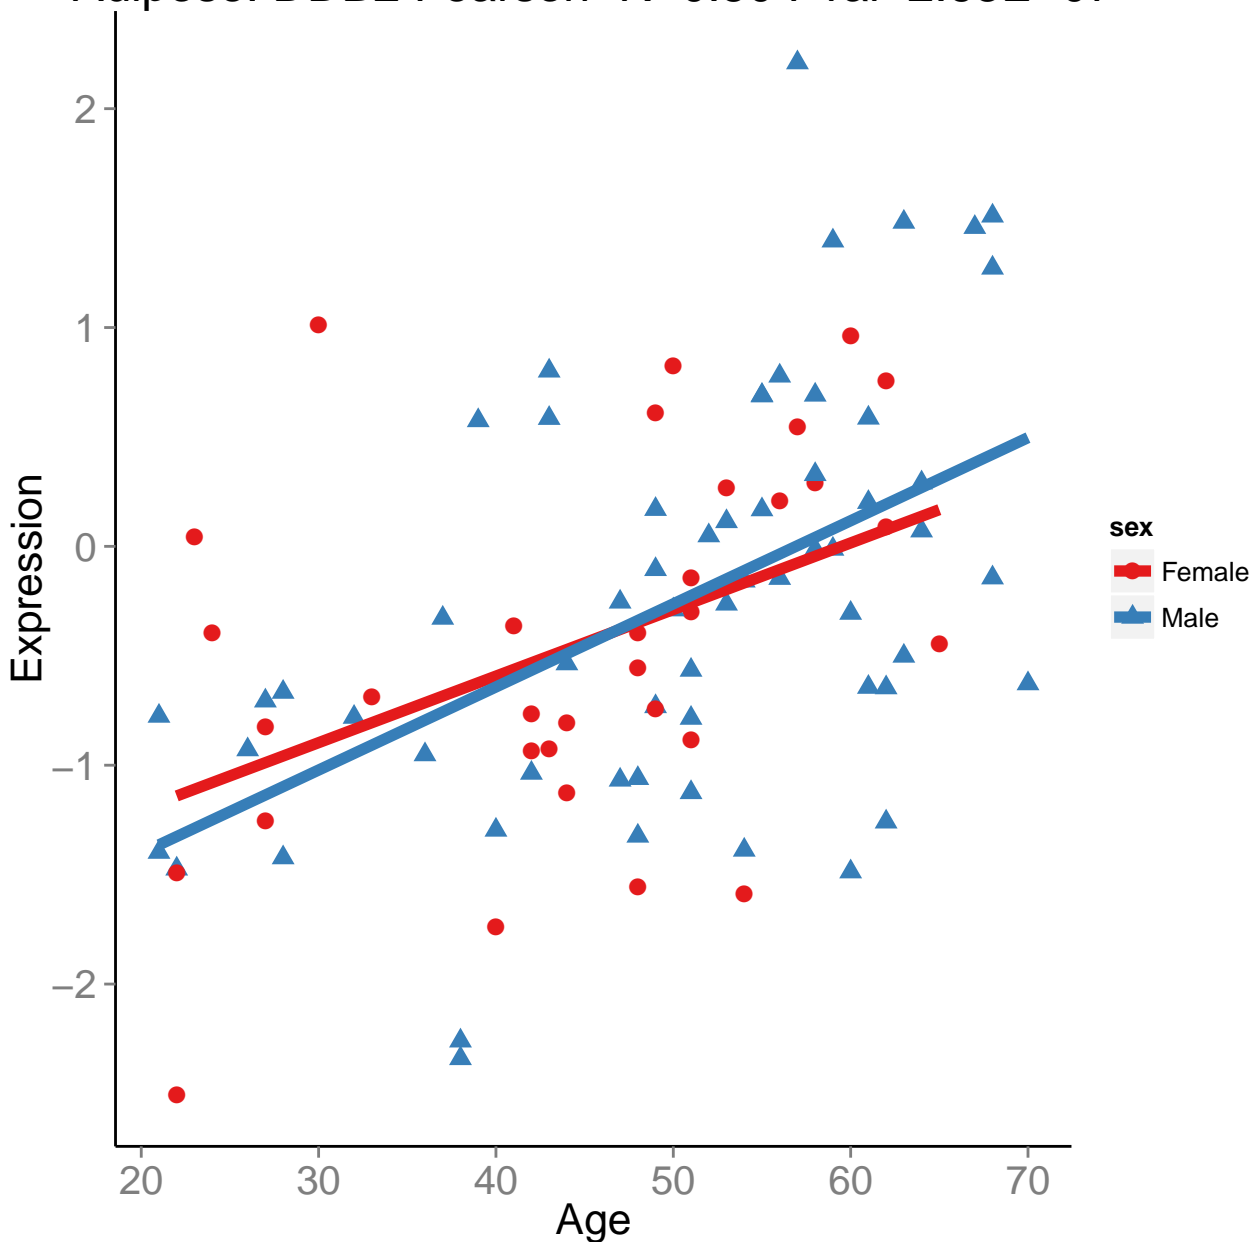

Adipose: TXNDC5 Pearson-R=-0.50 Pval=2.71E-07

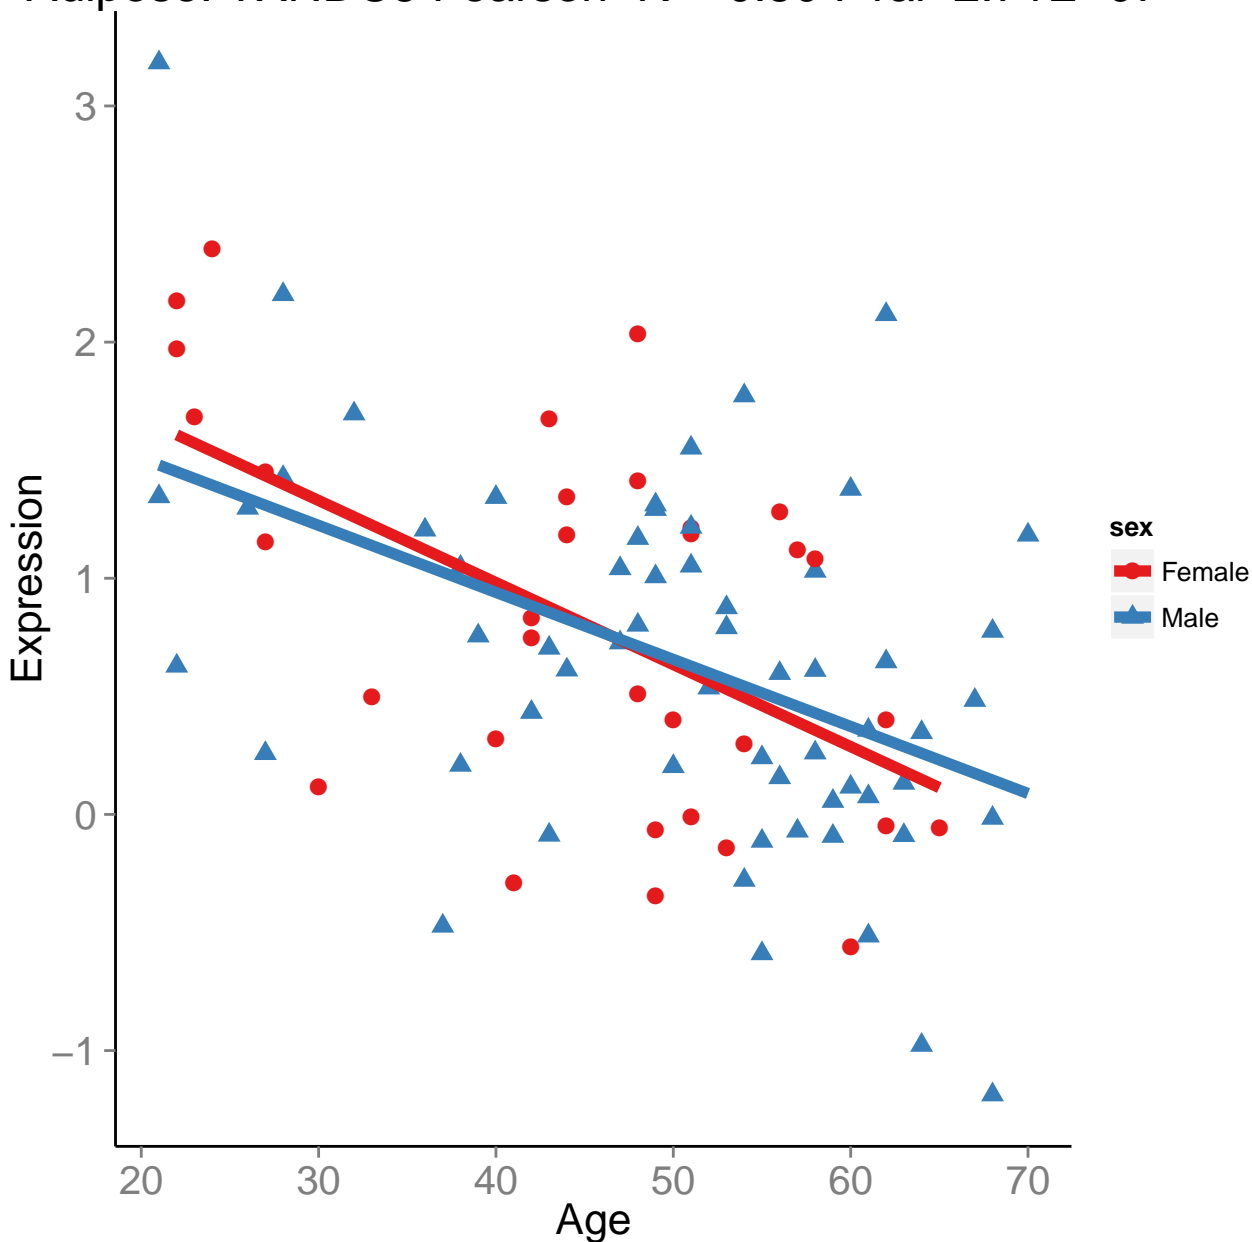



Adipose: AC011497.1 Pearson-R=-0.50 Pval=2.61E-07

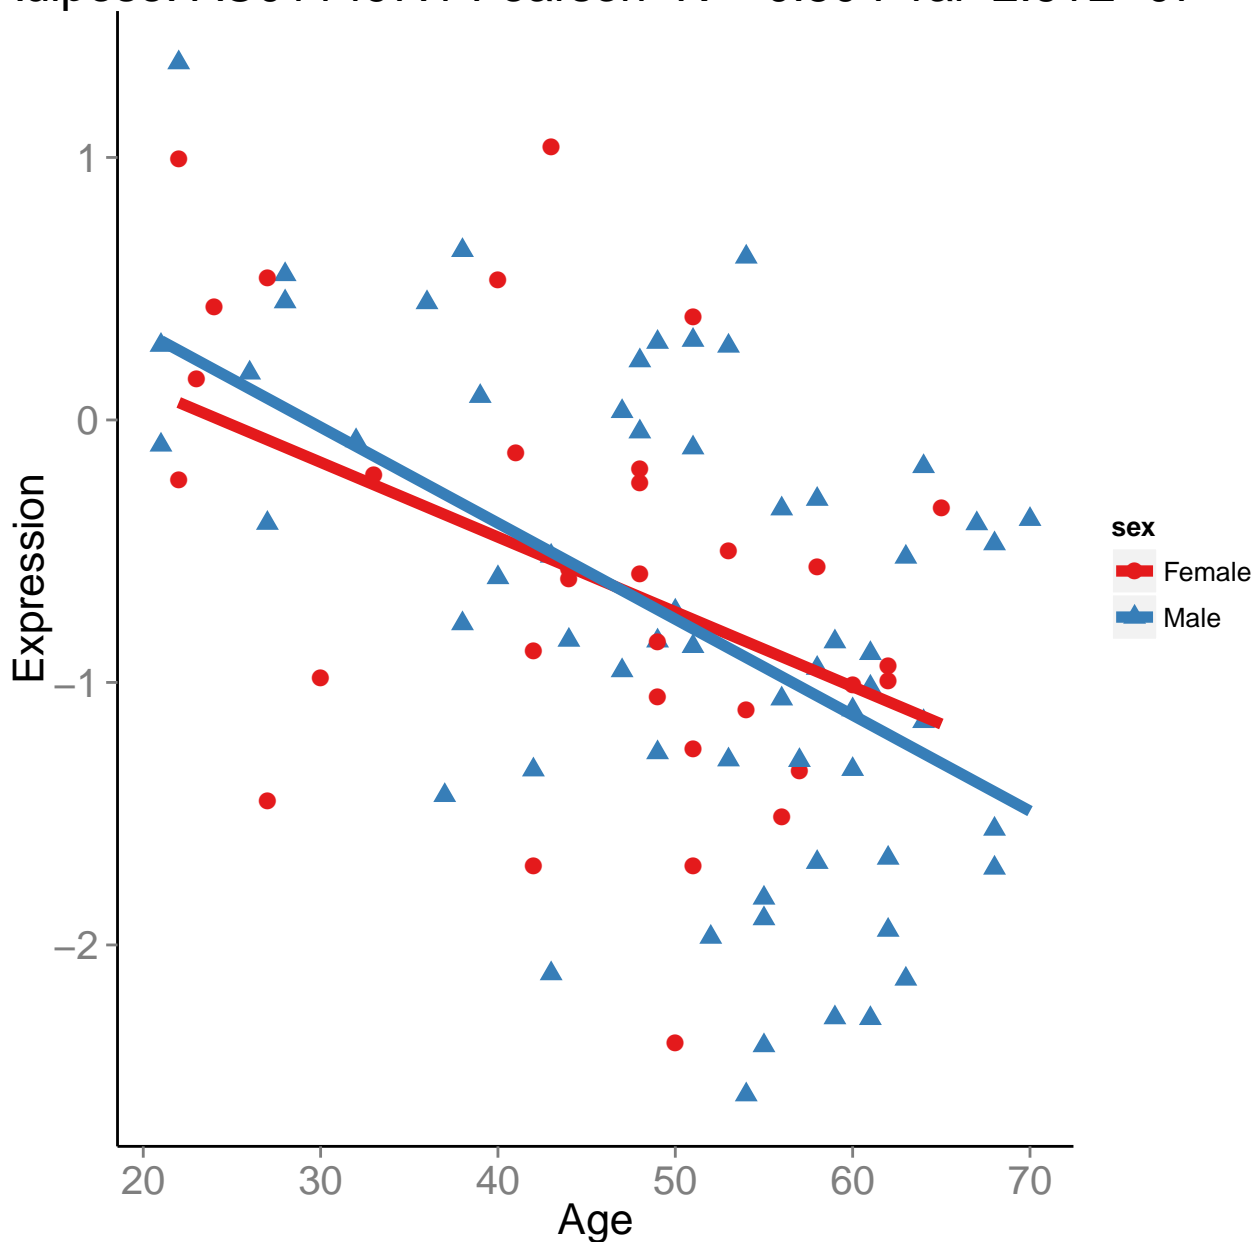

Adipose: RP4-781K5.2 Pearson-R=0.50 Pval=2.95E-07

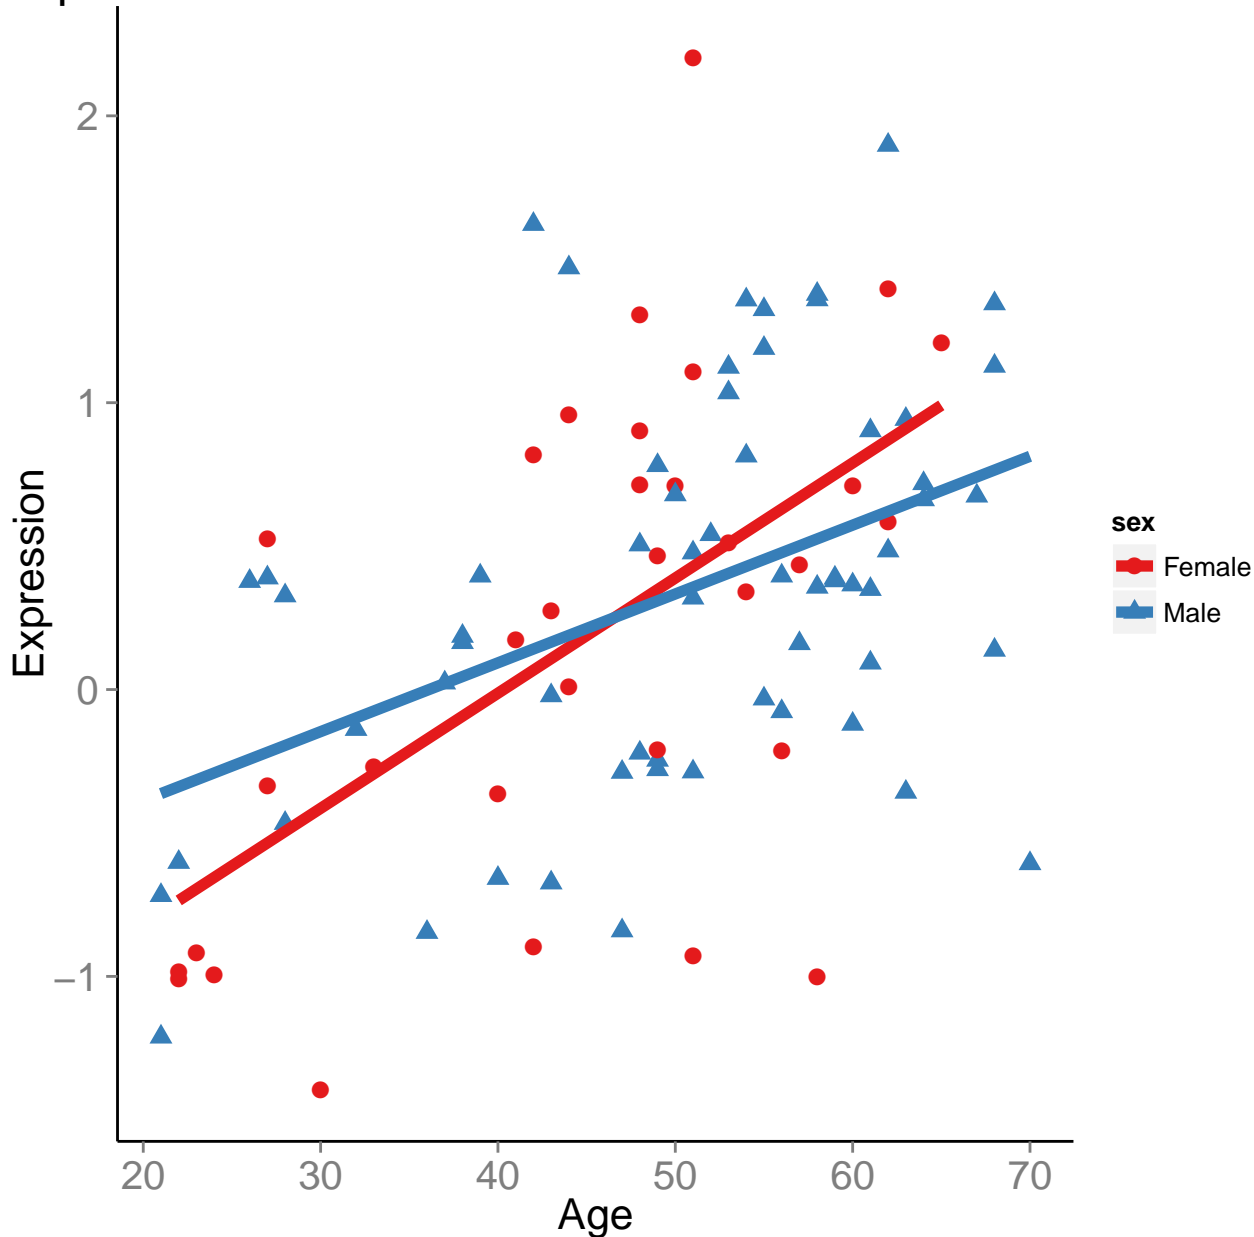

Adipose: ZMAT3 Pearson-R=0.50 Pval=3.13E-07

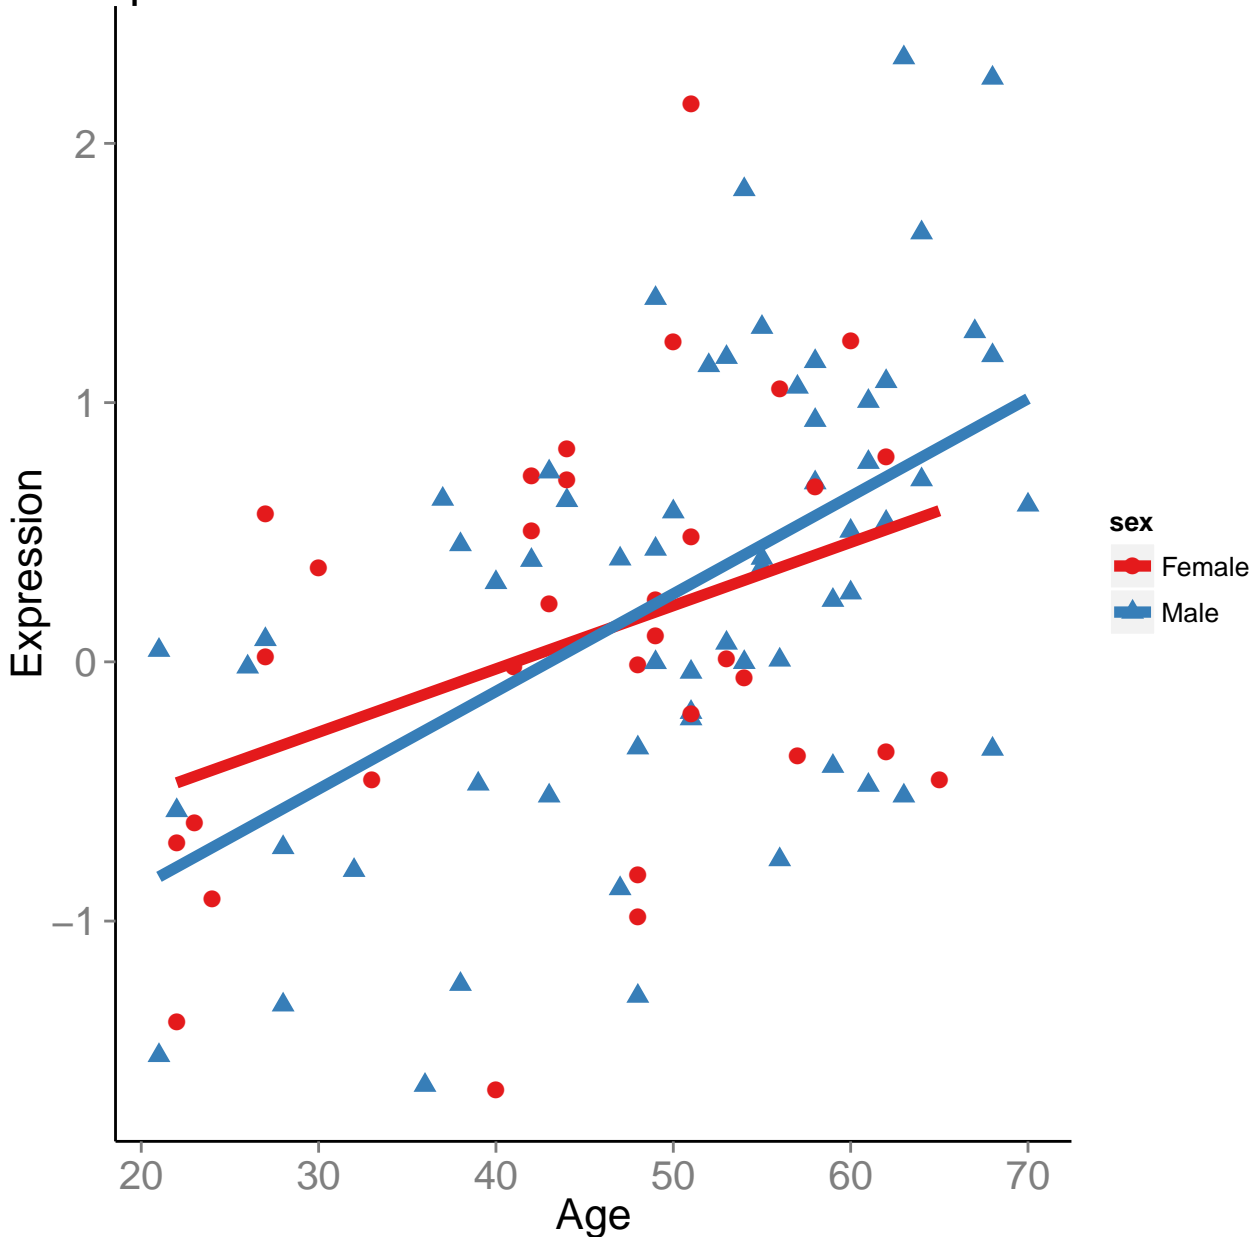

Adipose: KDM3A Pearson-R=0.50 Pval=3.17E-07

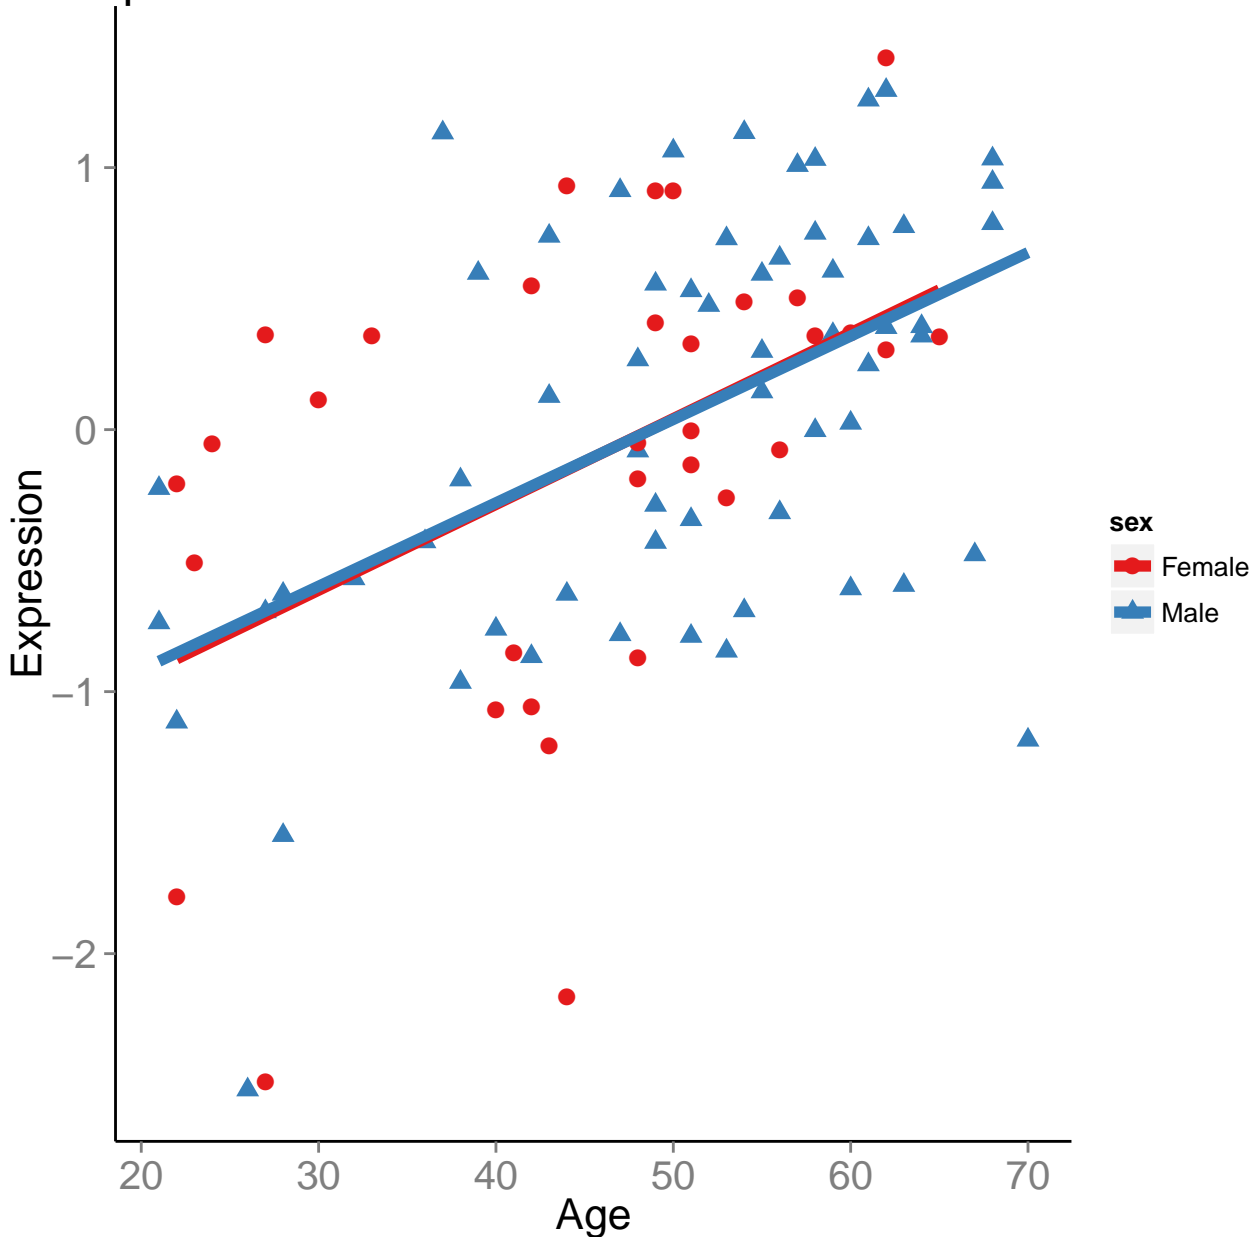

Adipose: ACAA2 Pearson-R=-0.50 Pval=2.98E-07

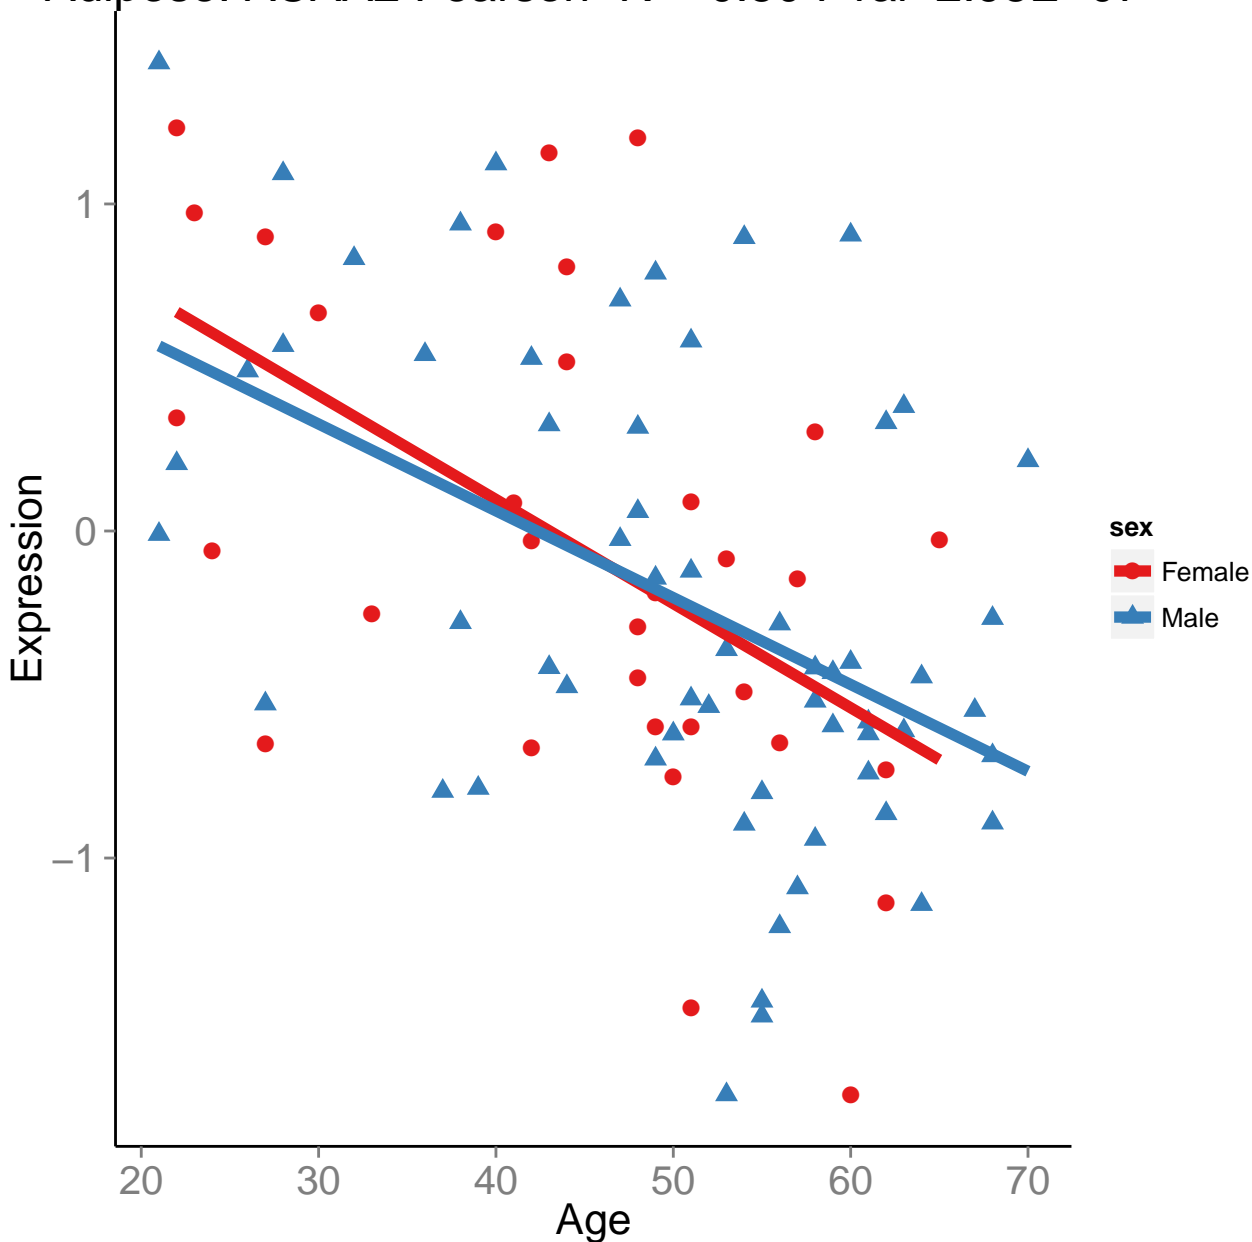

Adipose: ENO2 Pearson-R=0.50 Pval=3.47E-07

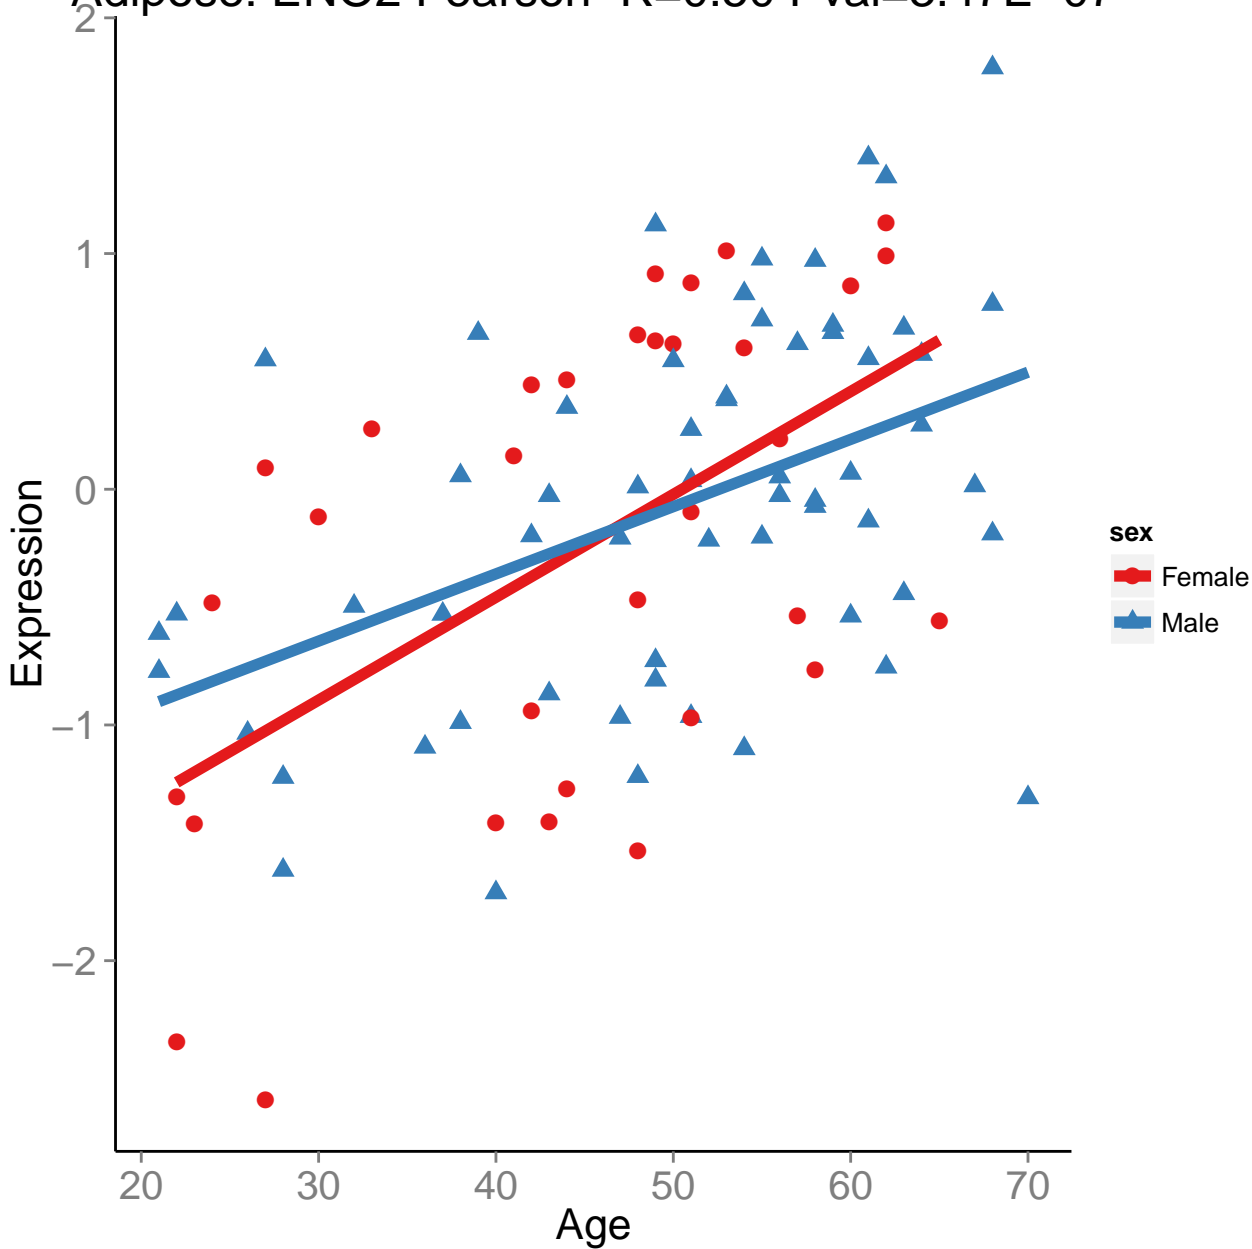

Adipose: GTF3C6 Pearson-R=-0.50 Pval=3.65E-07

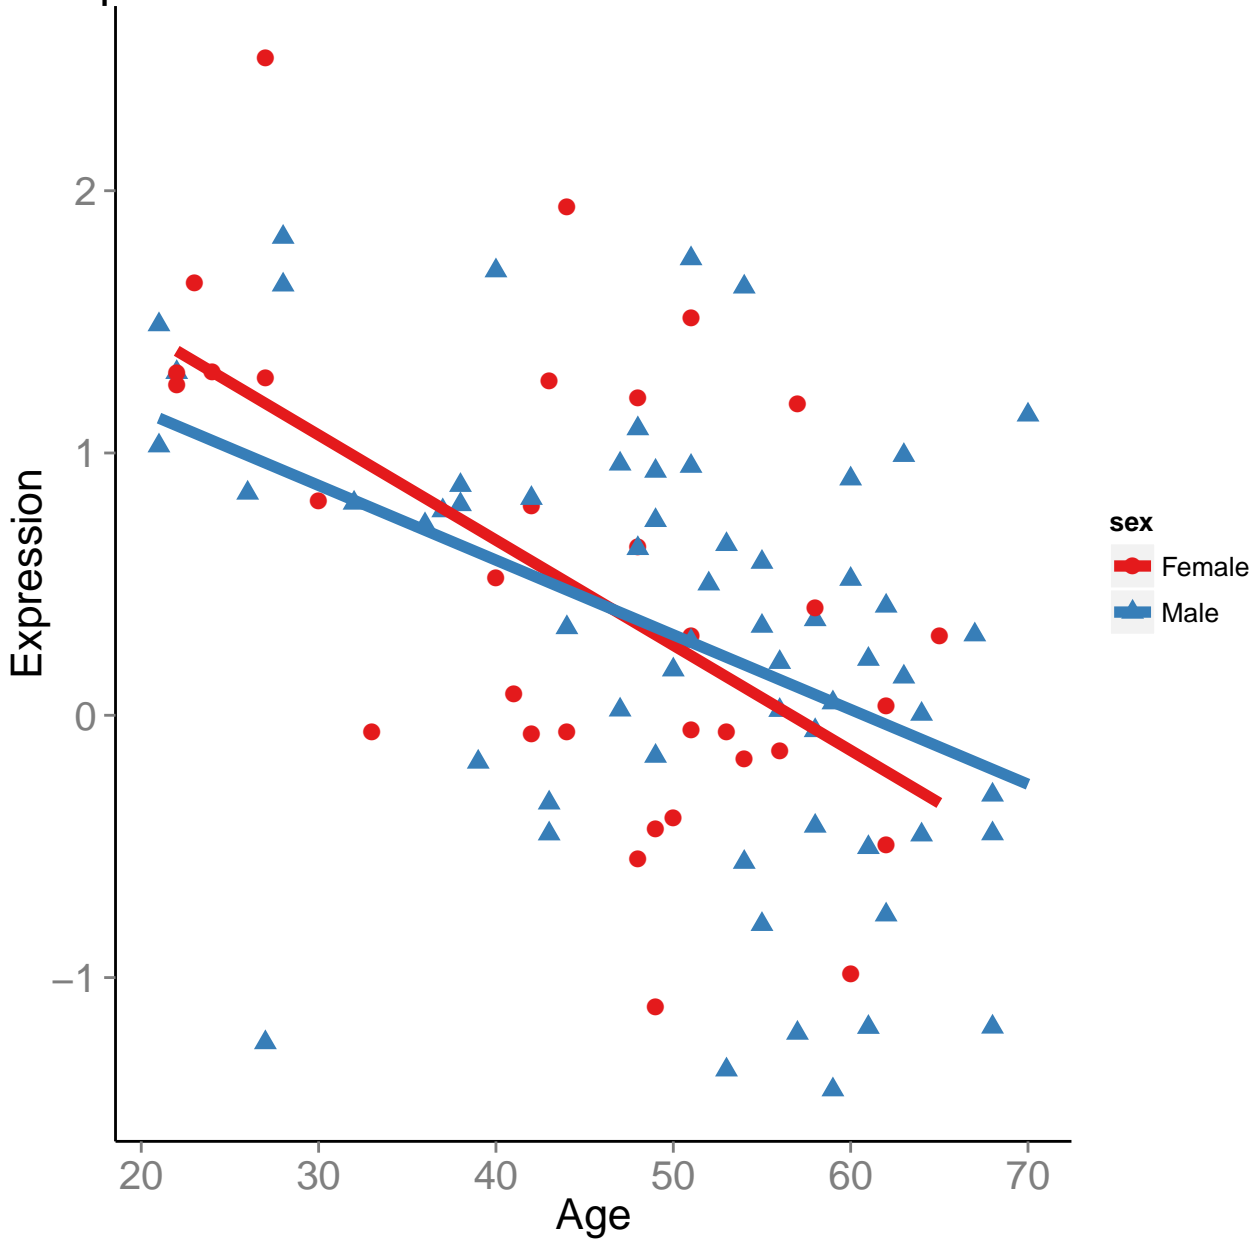

Adipose: MICALL1 Pearson-R=-0.50 Pval=3.87E-07

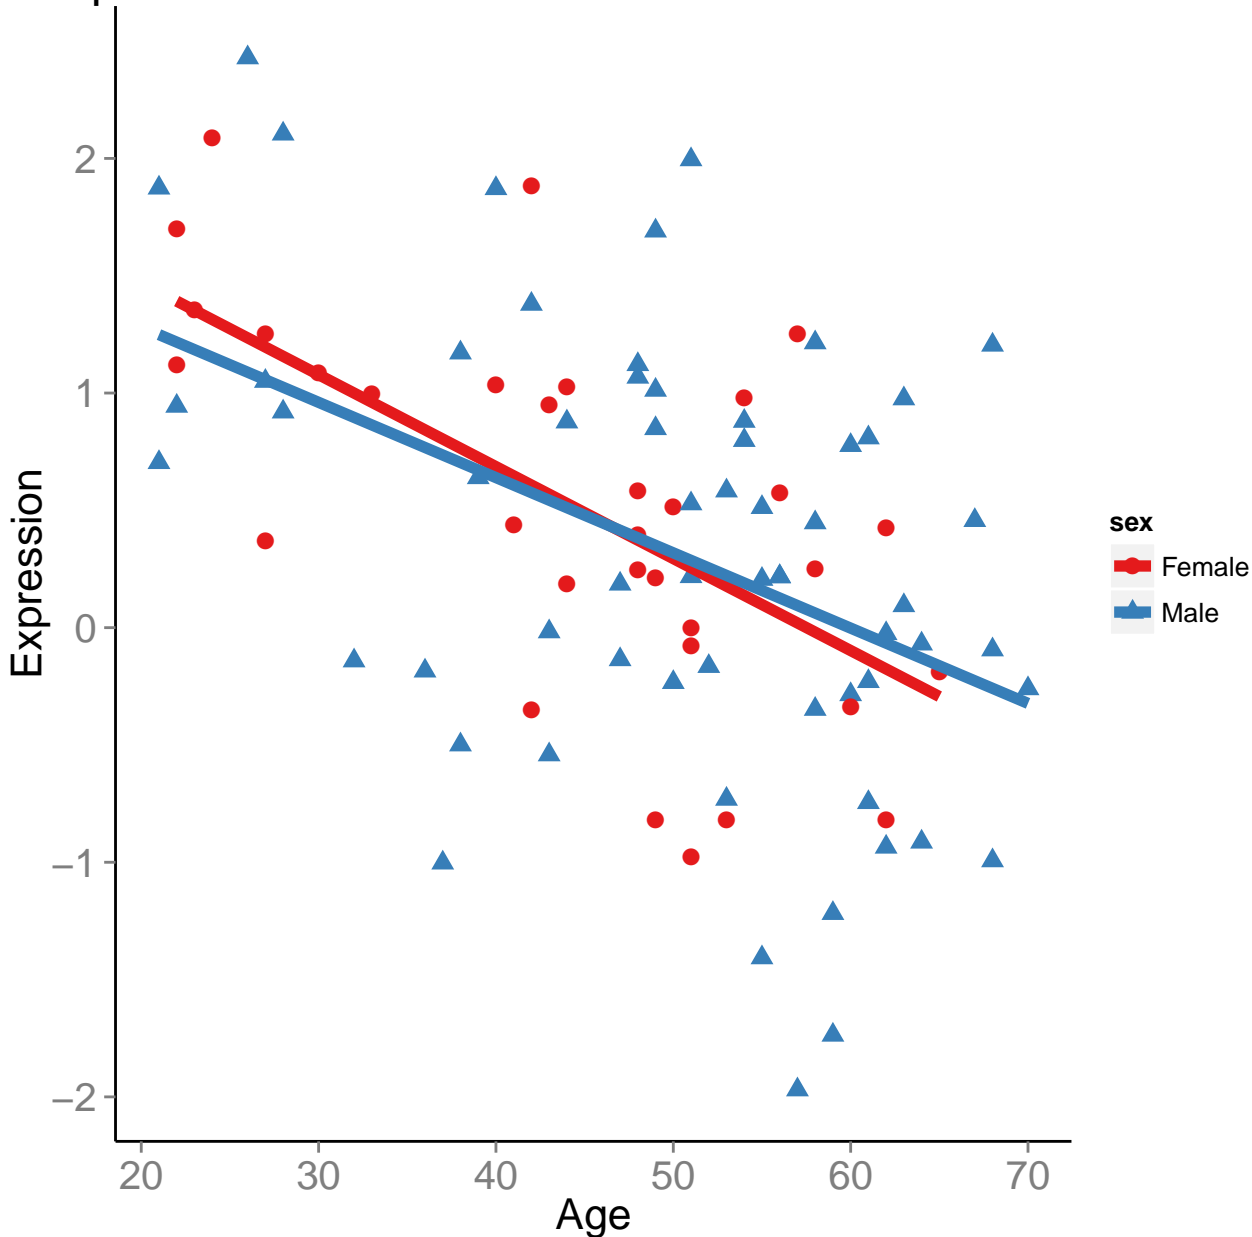



Adipose: COL4A2 Pearson-R=-0.49 Pval=4.11E-07

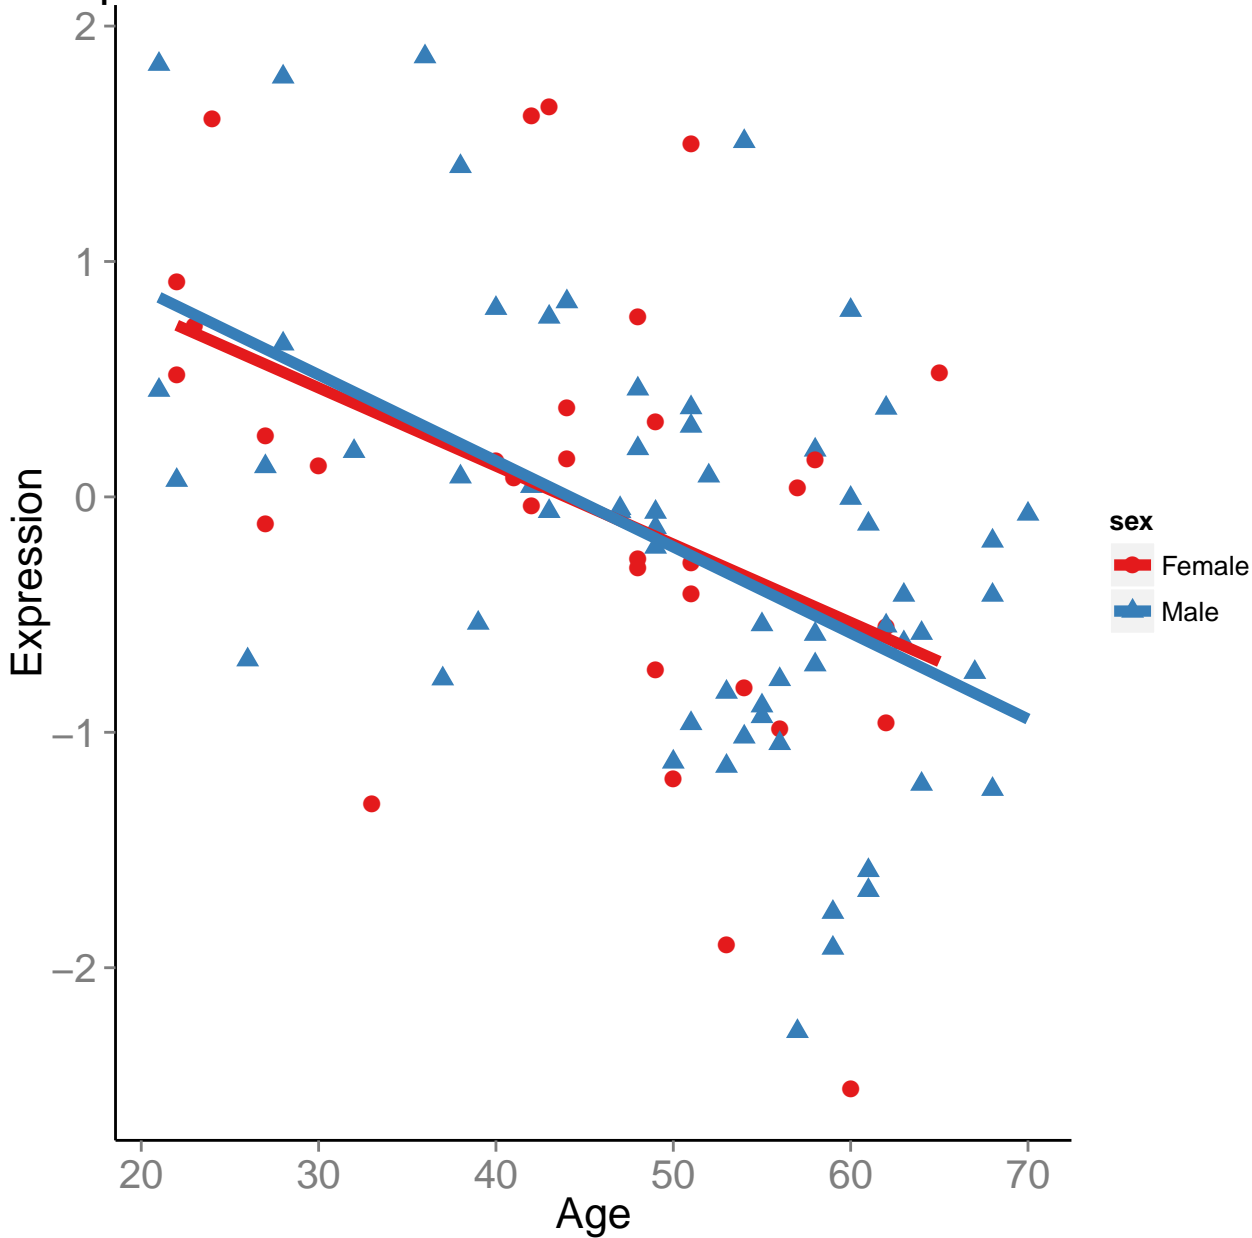

Adipose: RP11-33B1.4 Pearson-R=0.49 Pval=4.88E-07

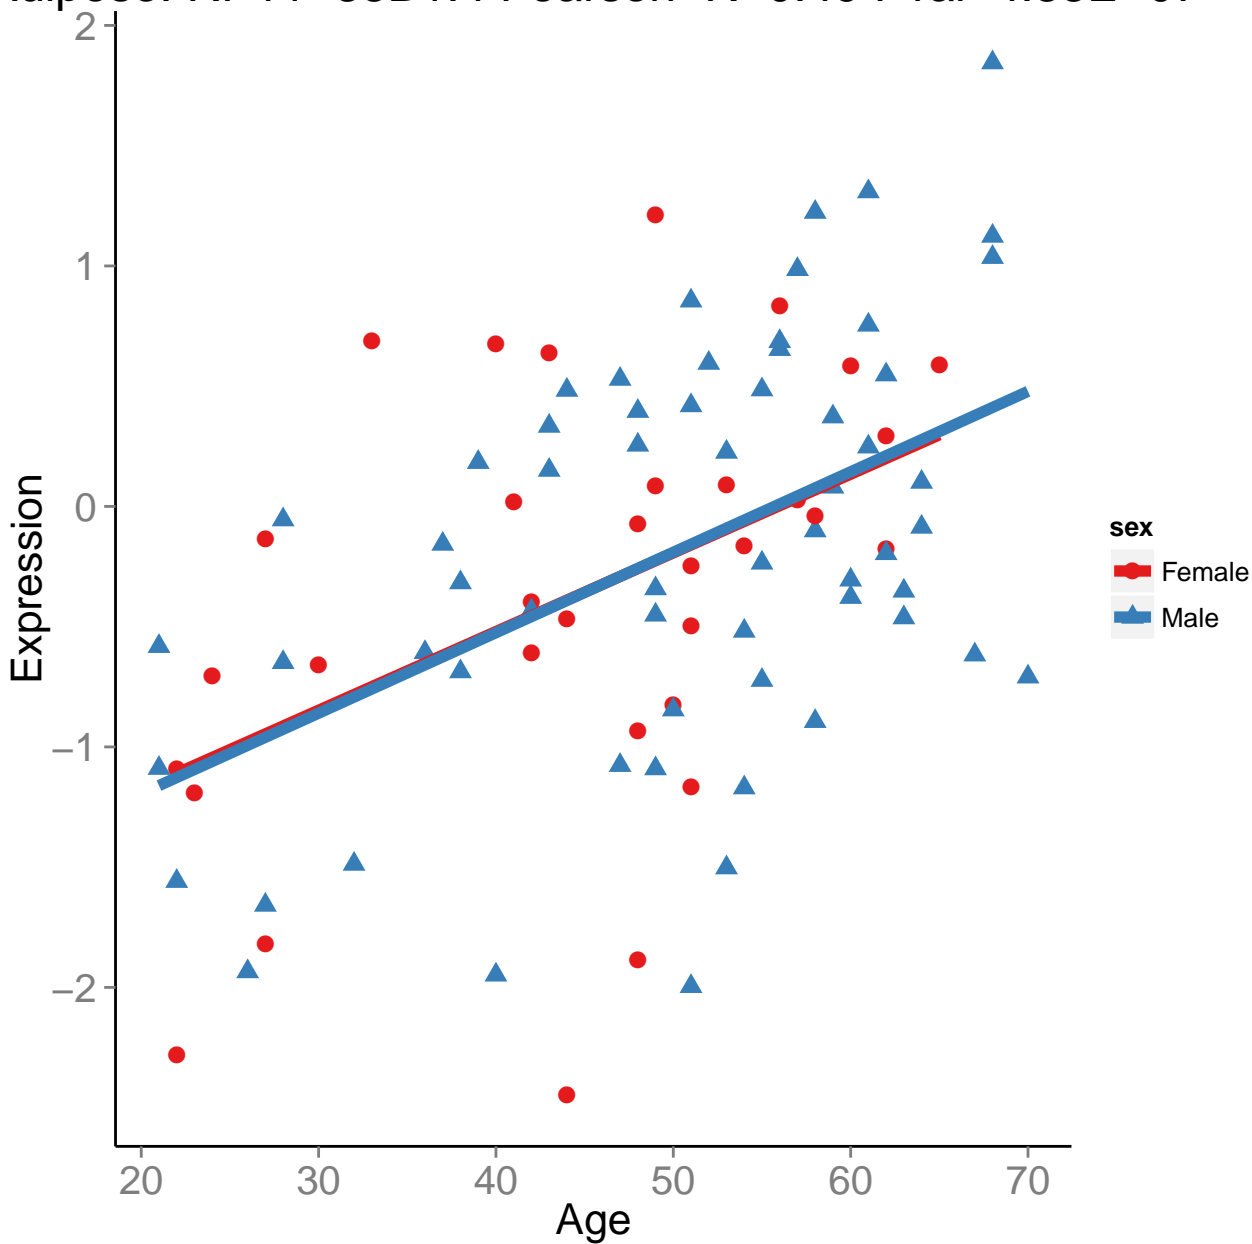

Adipose: TNK1 Pearson-R=0.49 Pval=4.76E-07

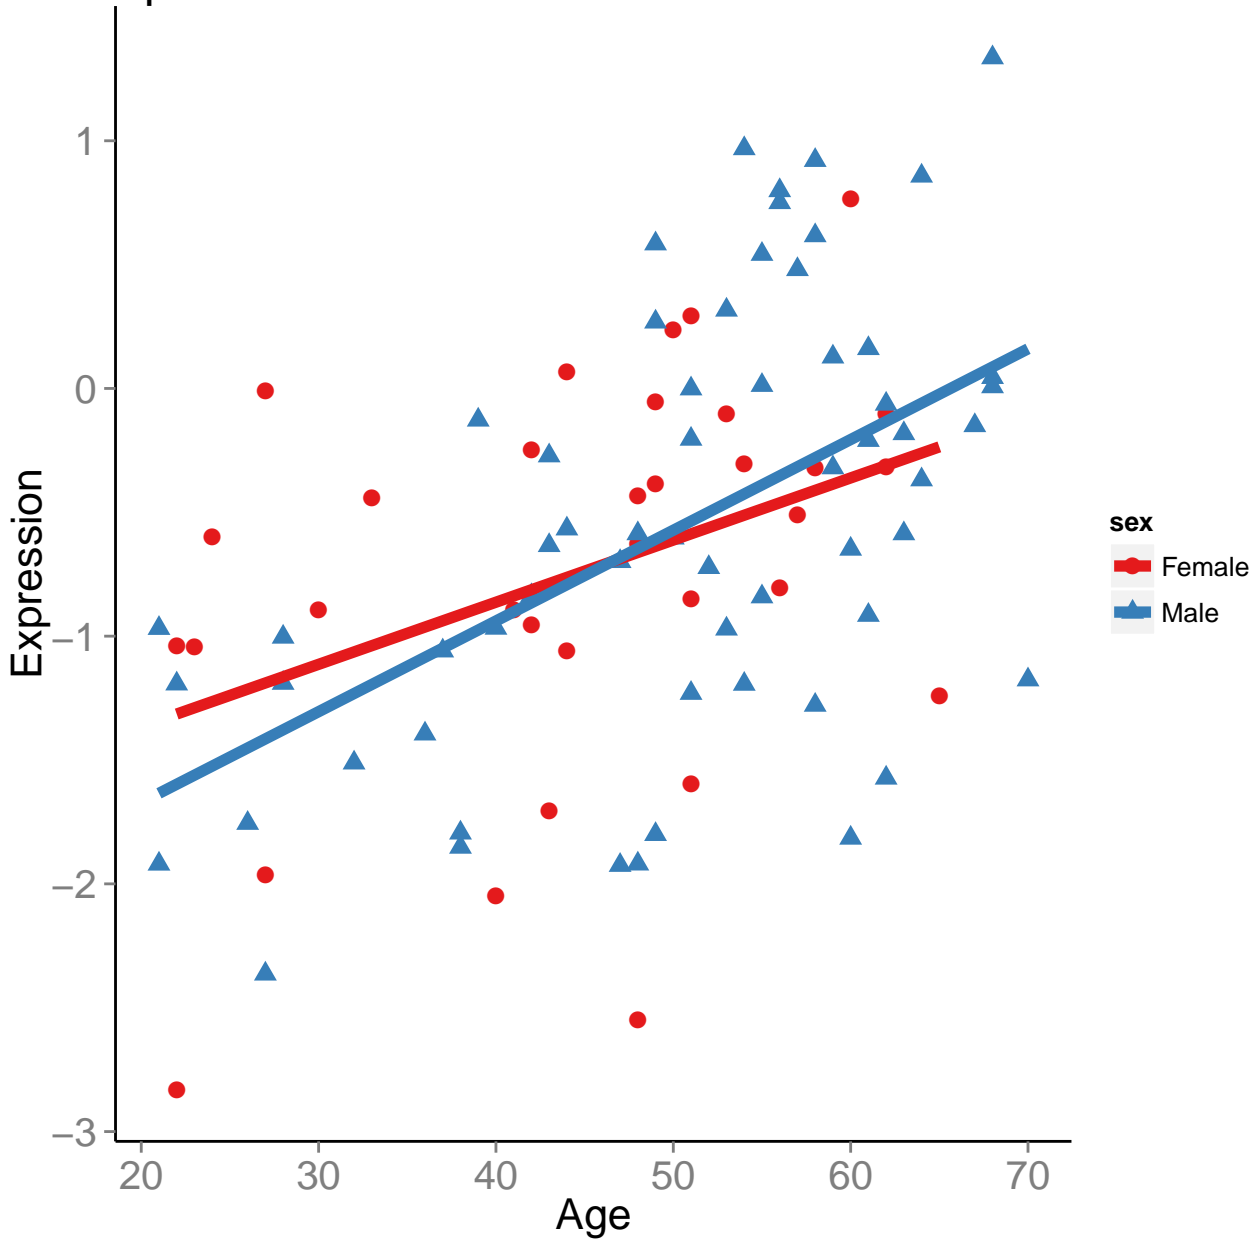

Adipose: ZNF548 Pearson-R=0.49 Pval=4.61E-07

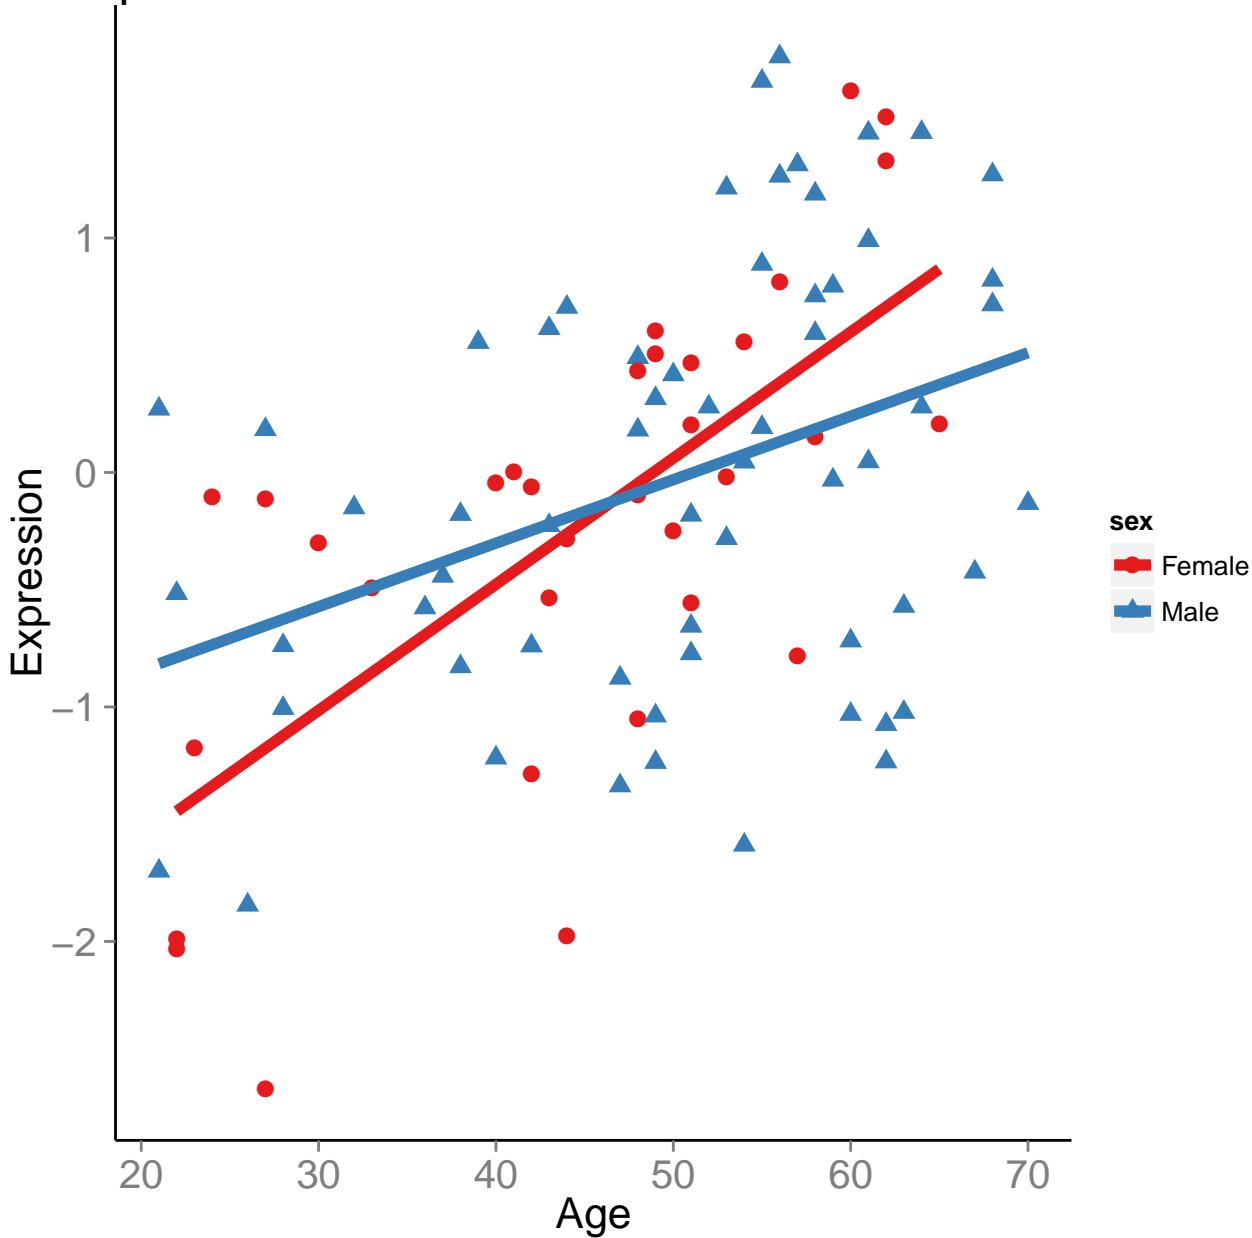

Adipose: EGLN1 Pearson-R=0.49 Pval=4.72E-07

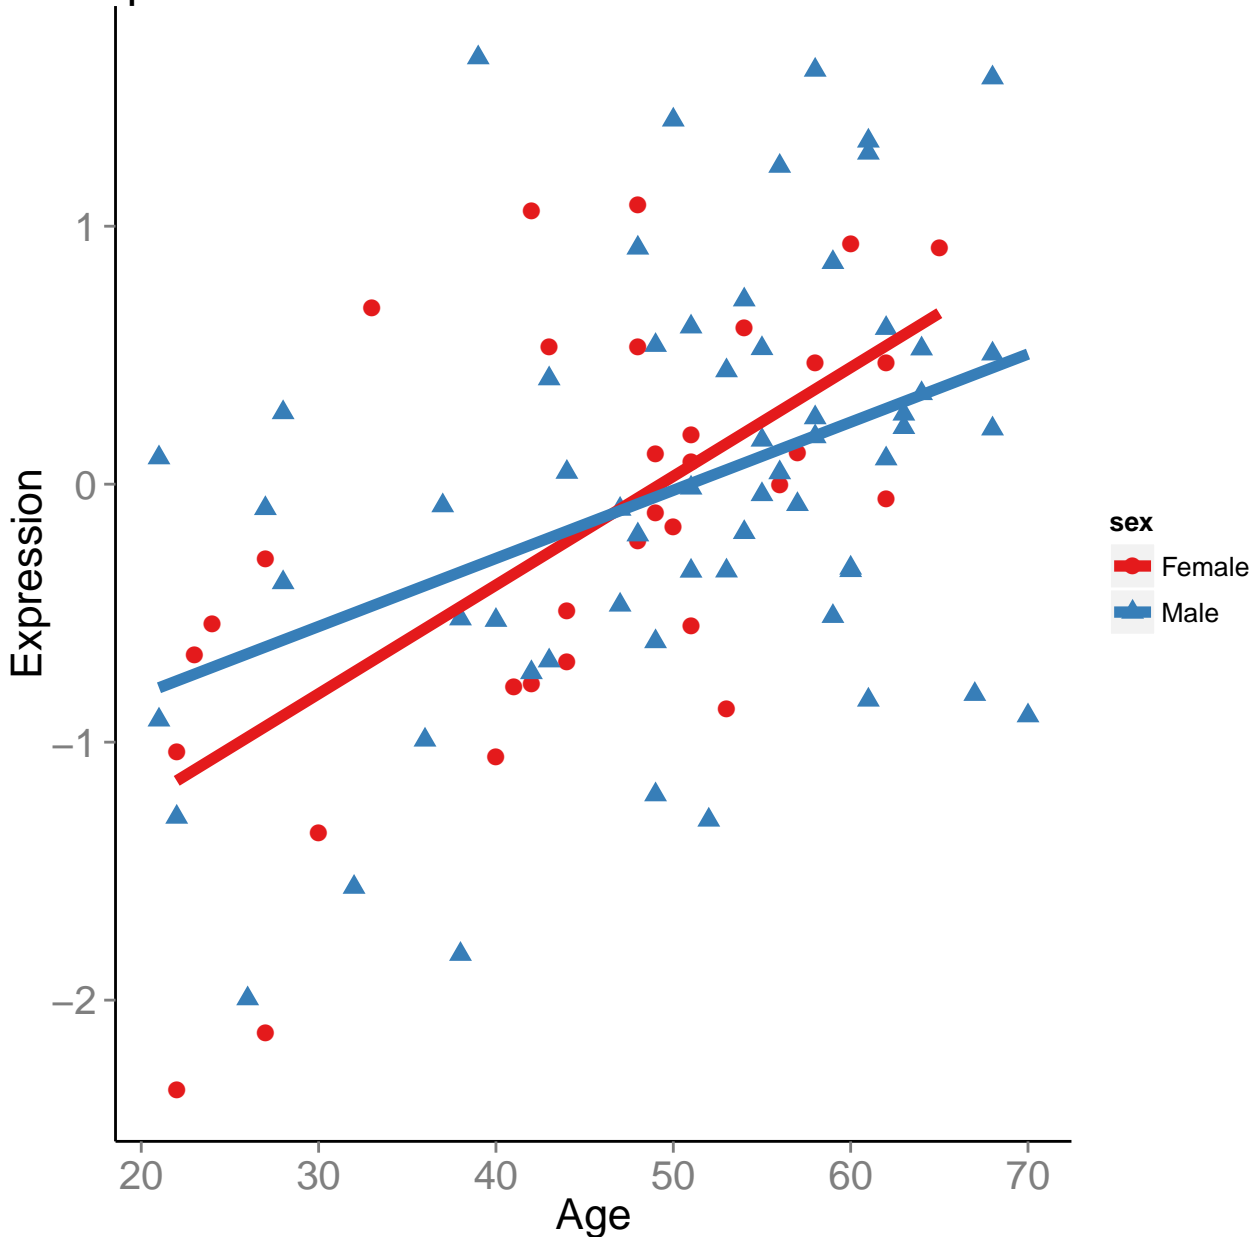

Adipose: PLEKHJ1 Pearson-R=-0.49 Pval=4.99E-07

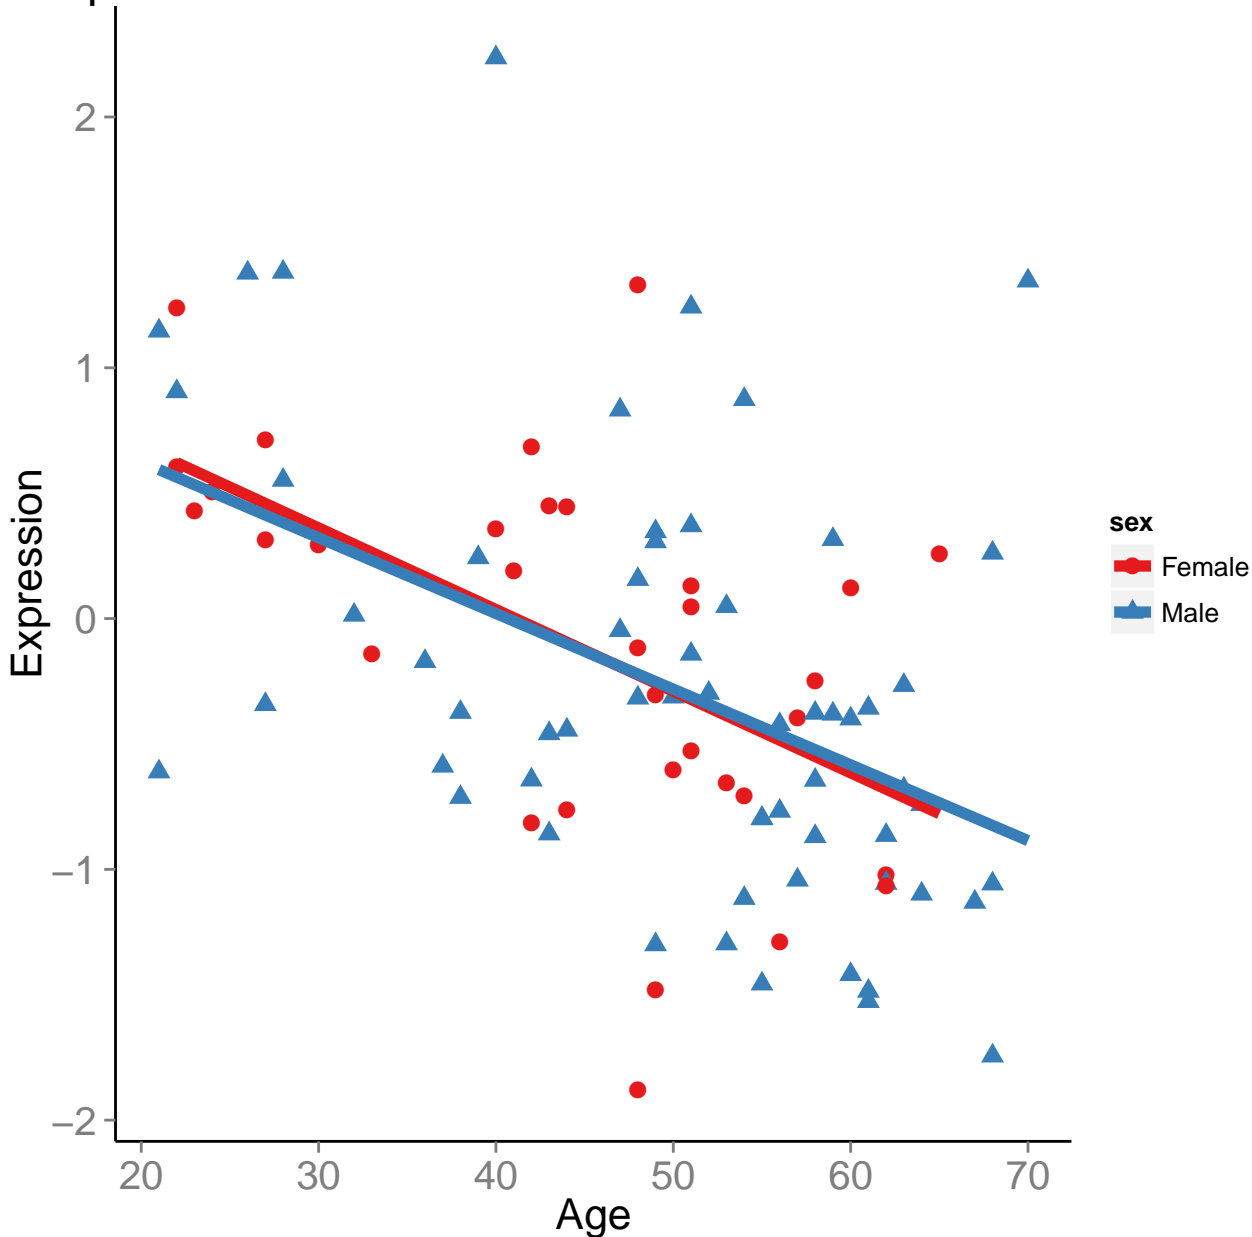

Adipose: NNAT Pearson-R=-0.49 Pval=5.83E-07

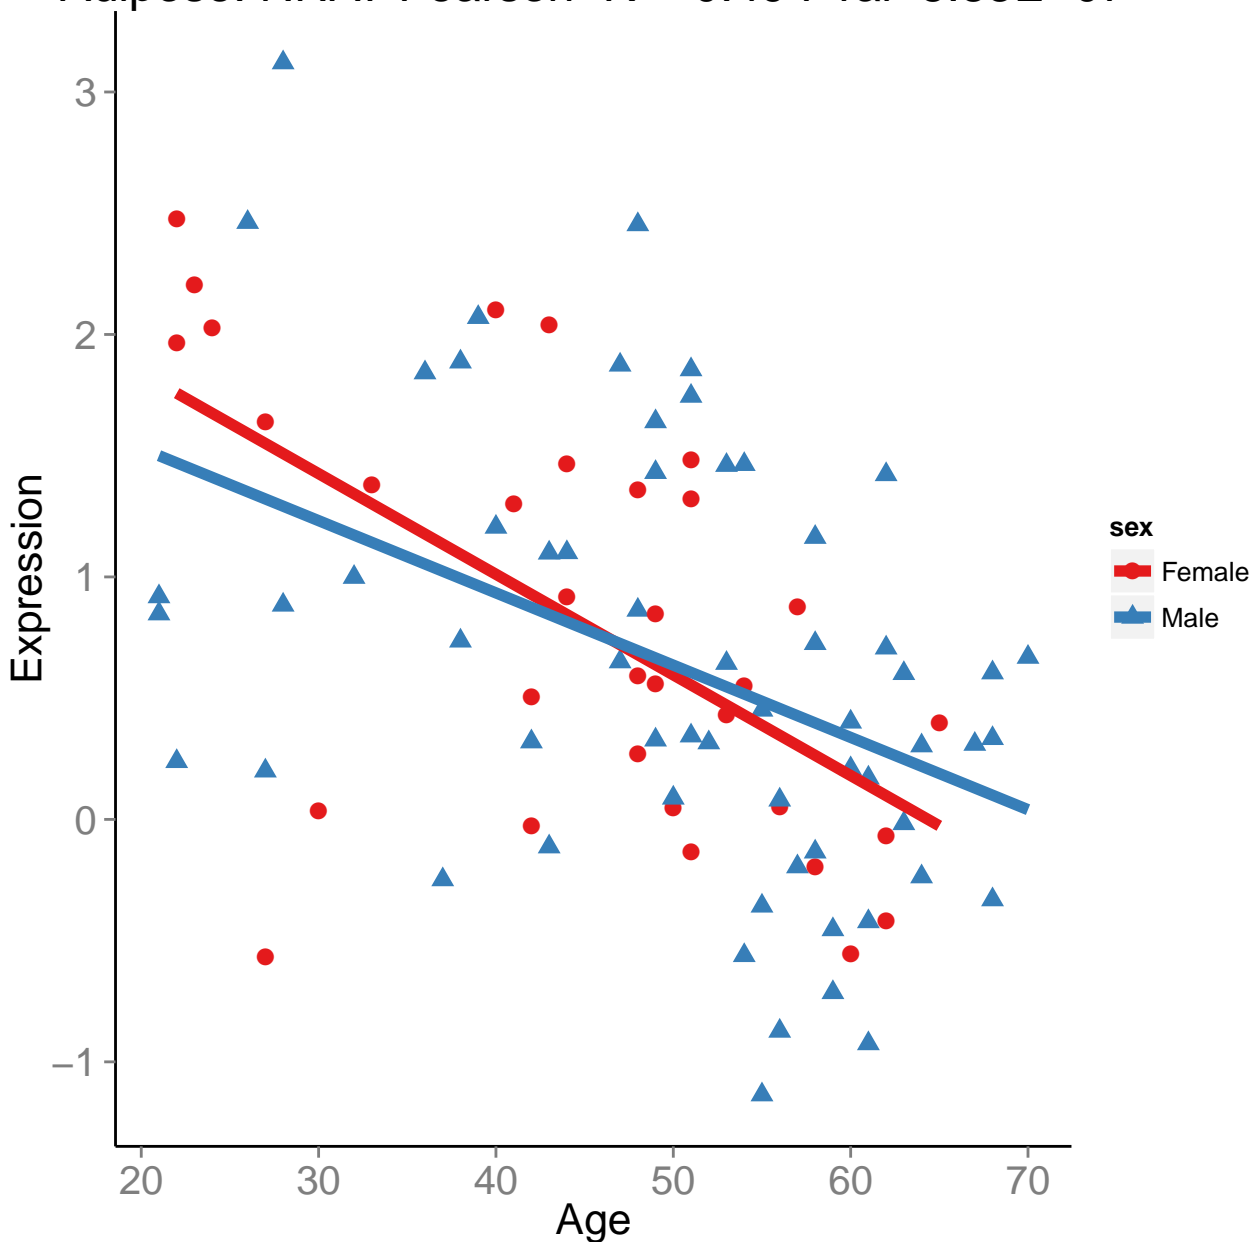

Adipose: FAS Pearson-R=0.49 Pval=5.47E-07

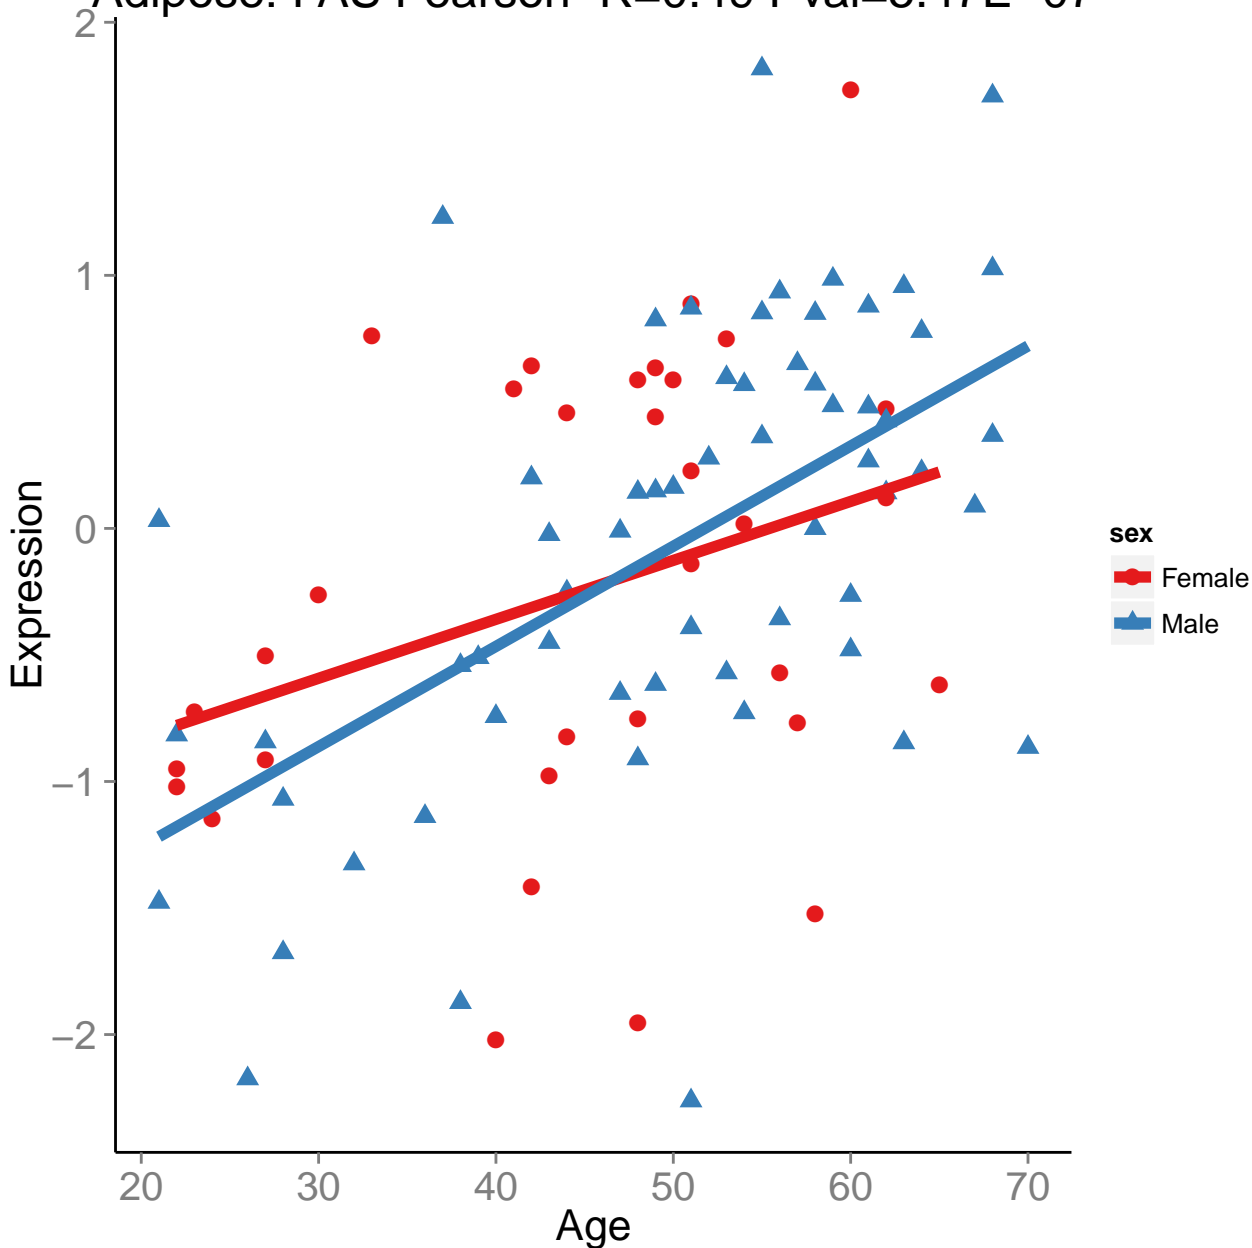



Adipose: ASS1 Pearson-R=-0.49 Pval=5.58E-07

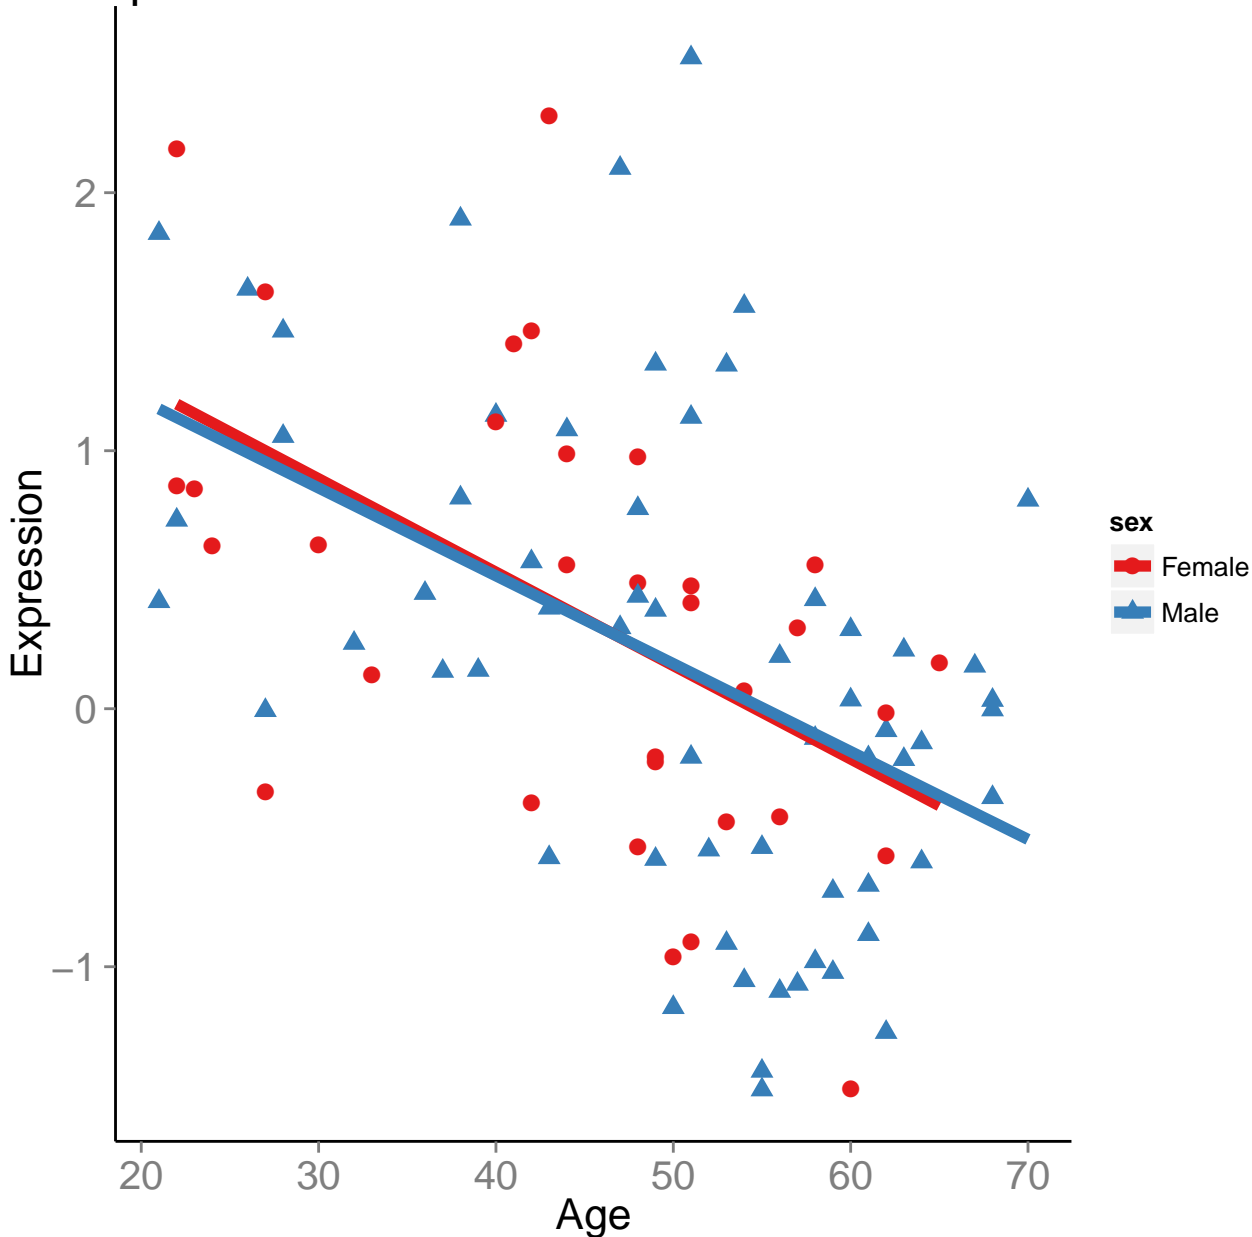

Adipose: FPGS Pearson-R=-0.49 Pval=5.79E-07

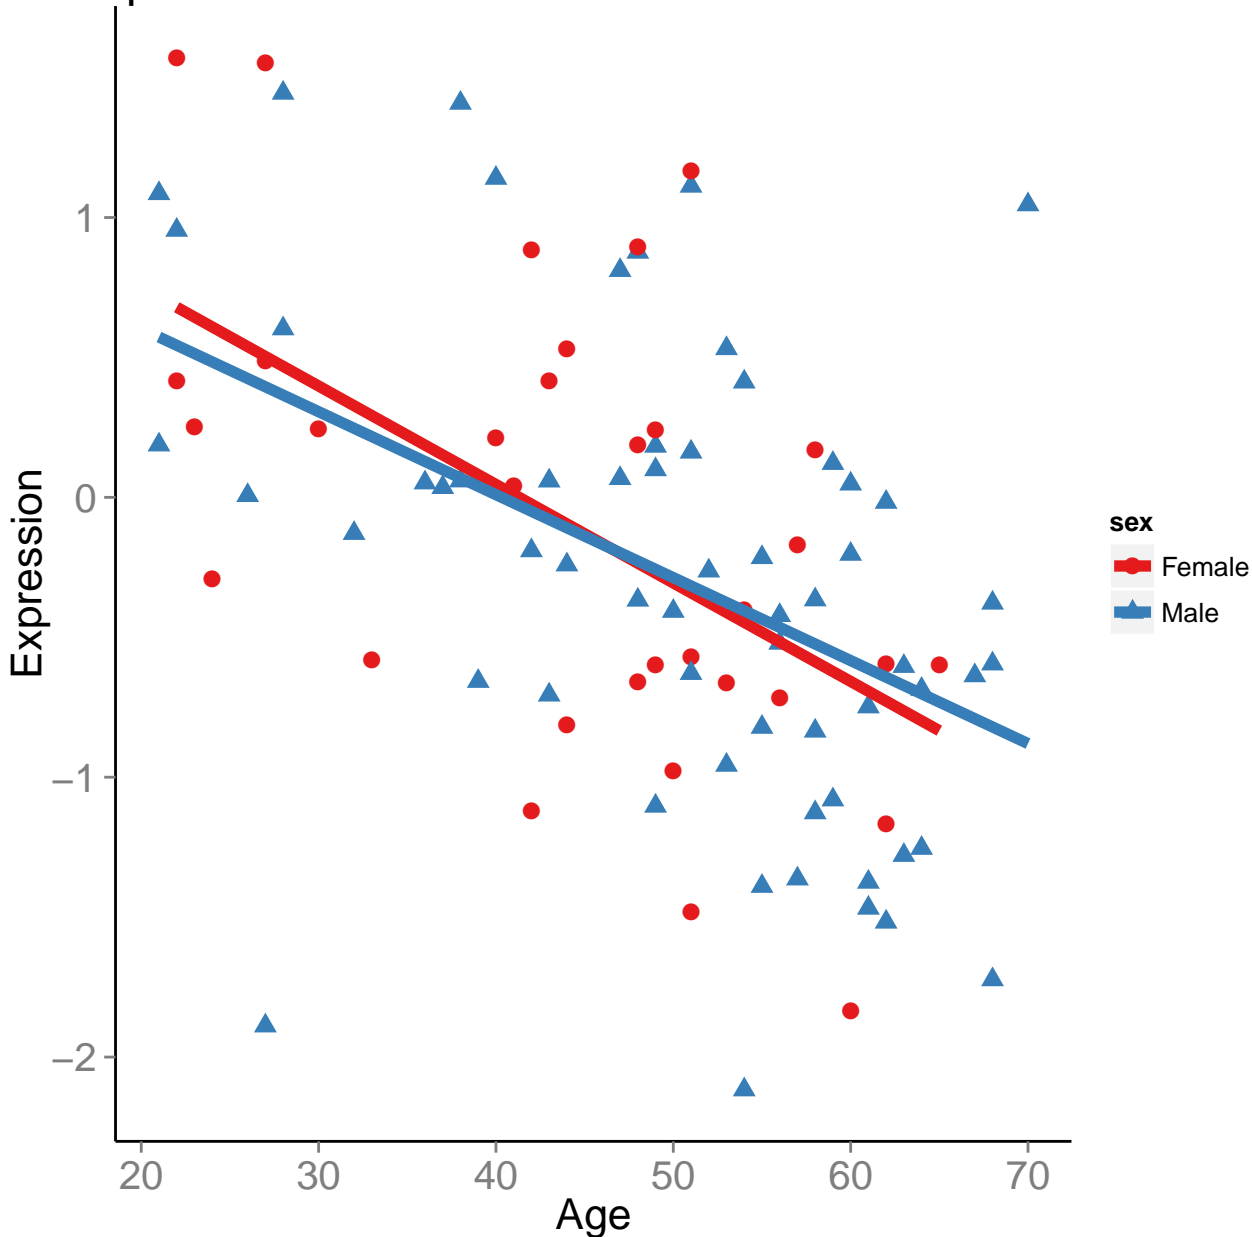

Adipose: TLR5 Pearson-R=0.49 Pval=6.48E-07

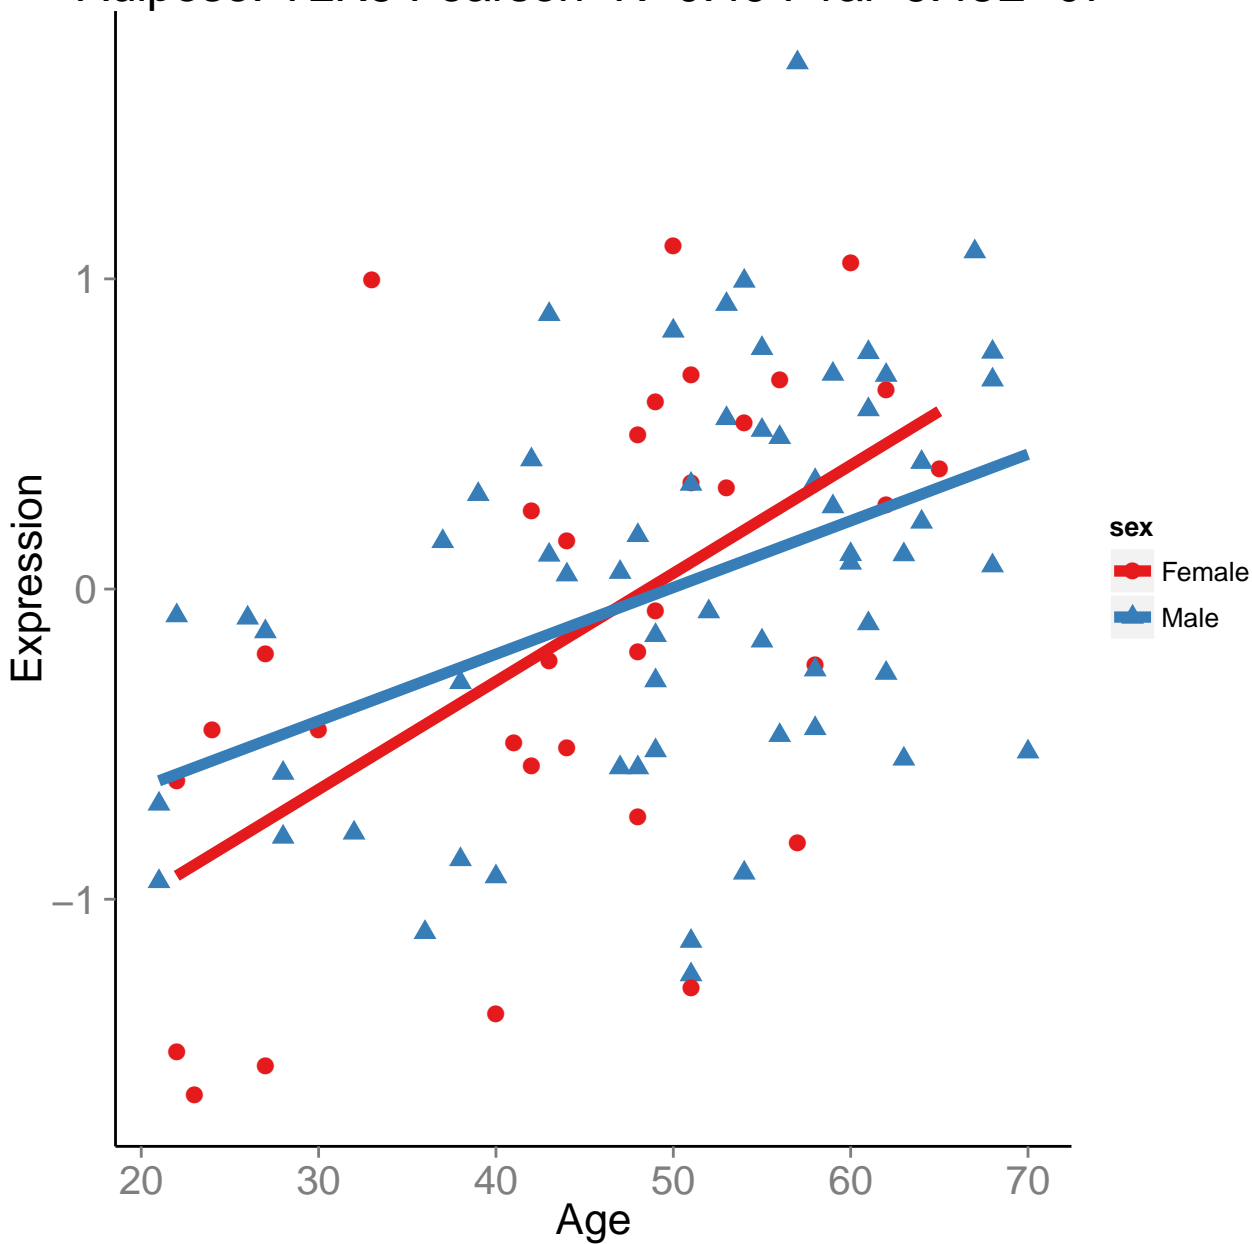

Adipose: TCF15 Pearson-R=-0.49 Pval=6.46E-07

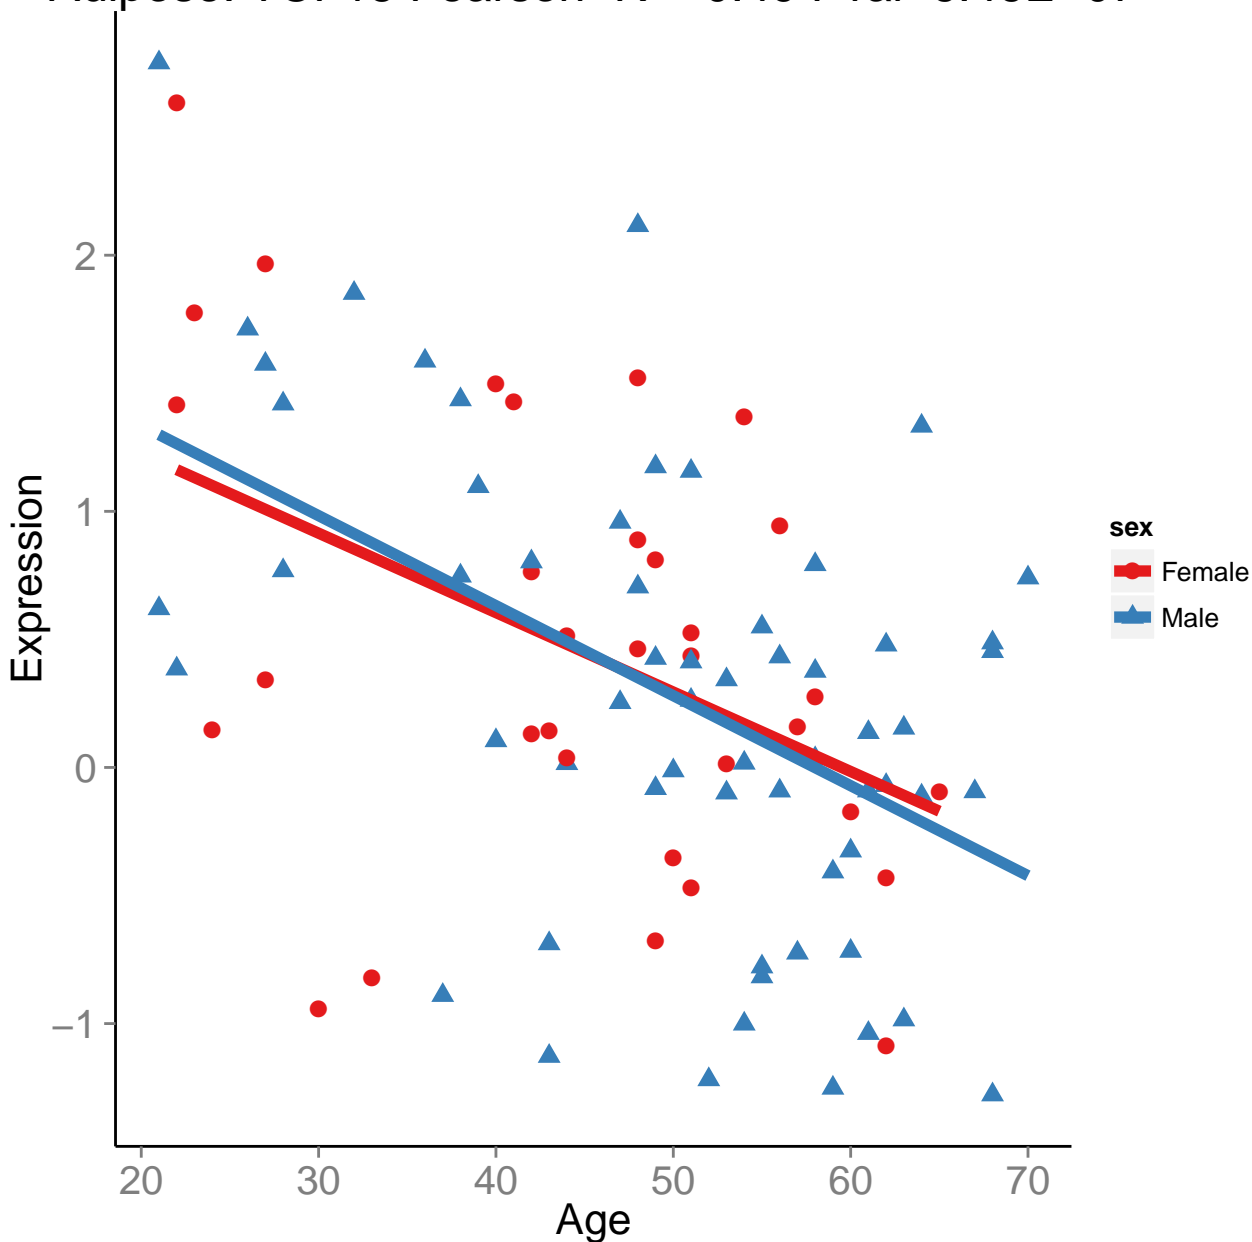

Adipose: ALDH1A2 Pearson-R=0.49 Pval=6.32E-07

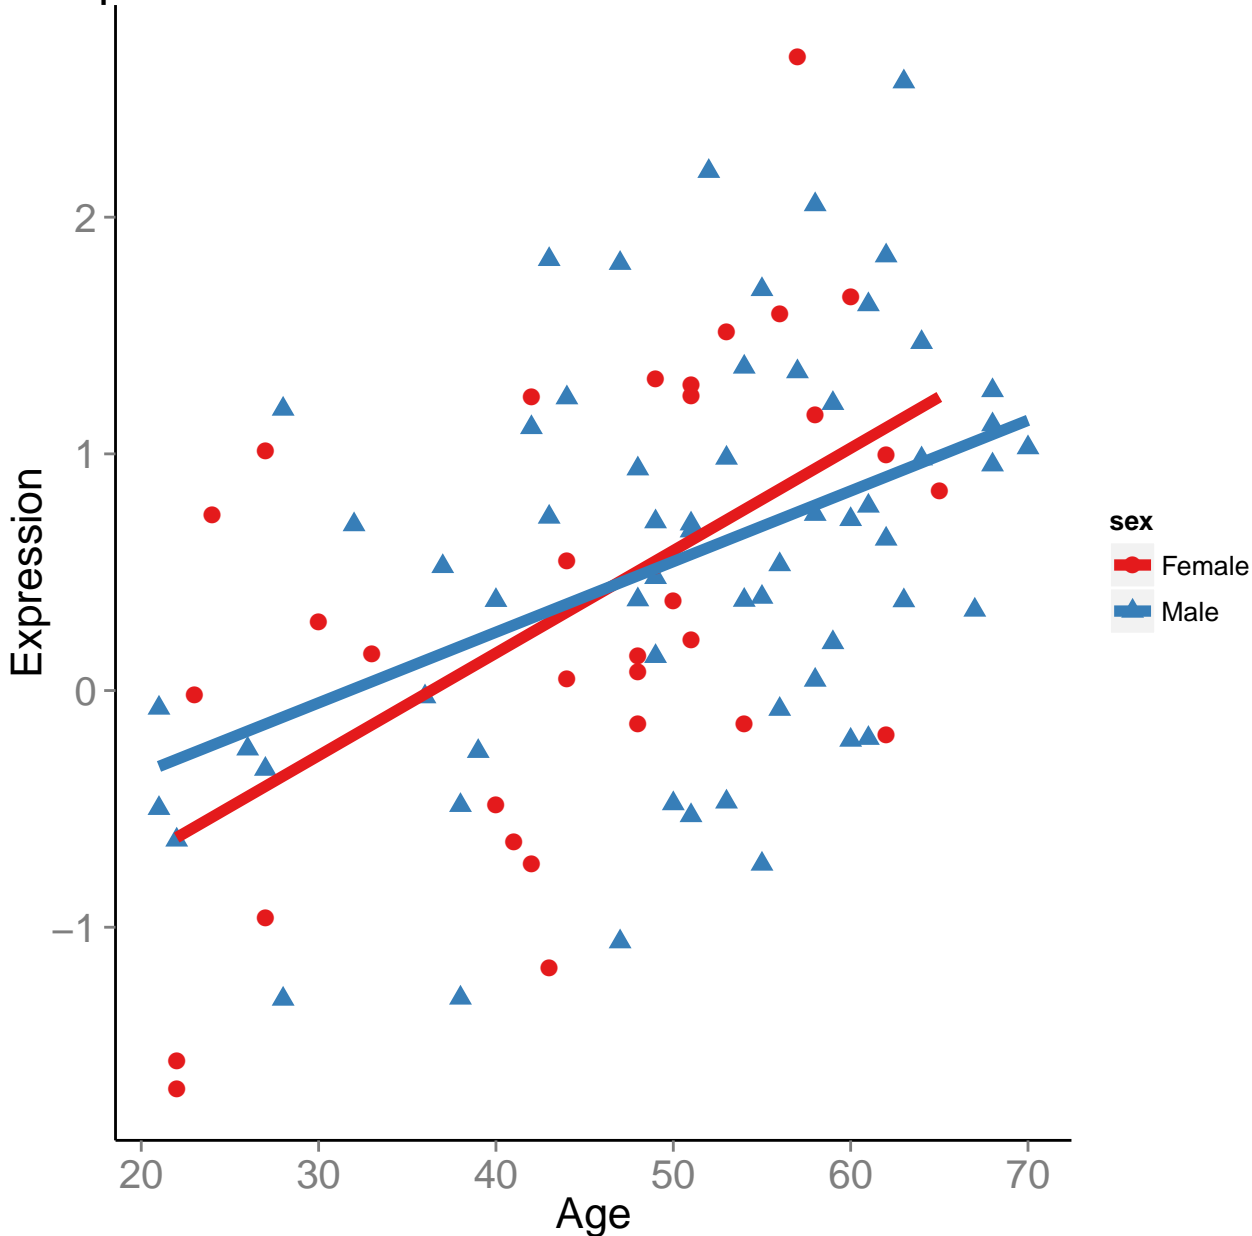

Adipose: ZNF177 Pearson-R=0.49 Pval=6.85E-07

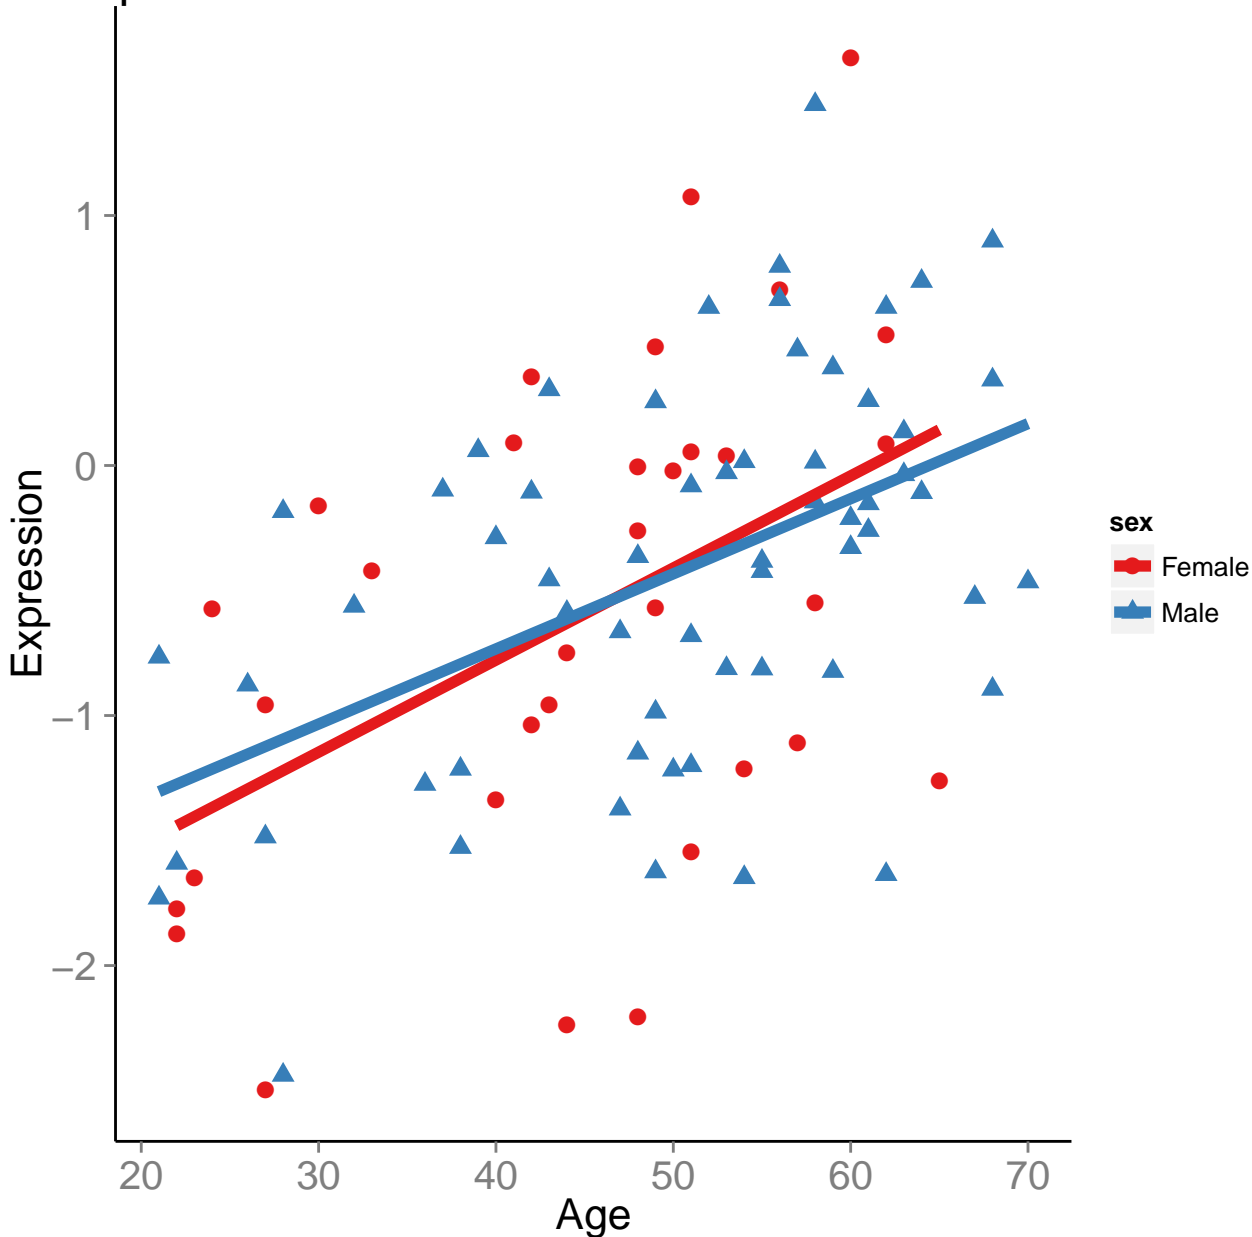

Adipose: ARRB1 Pearson-R=-0.49 Pval=6.85E-07

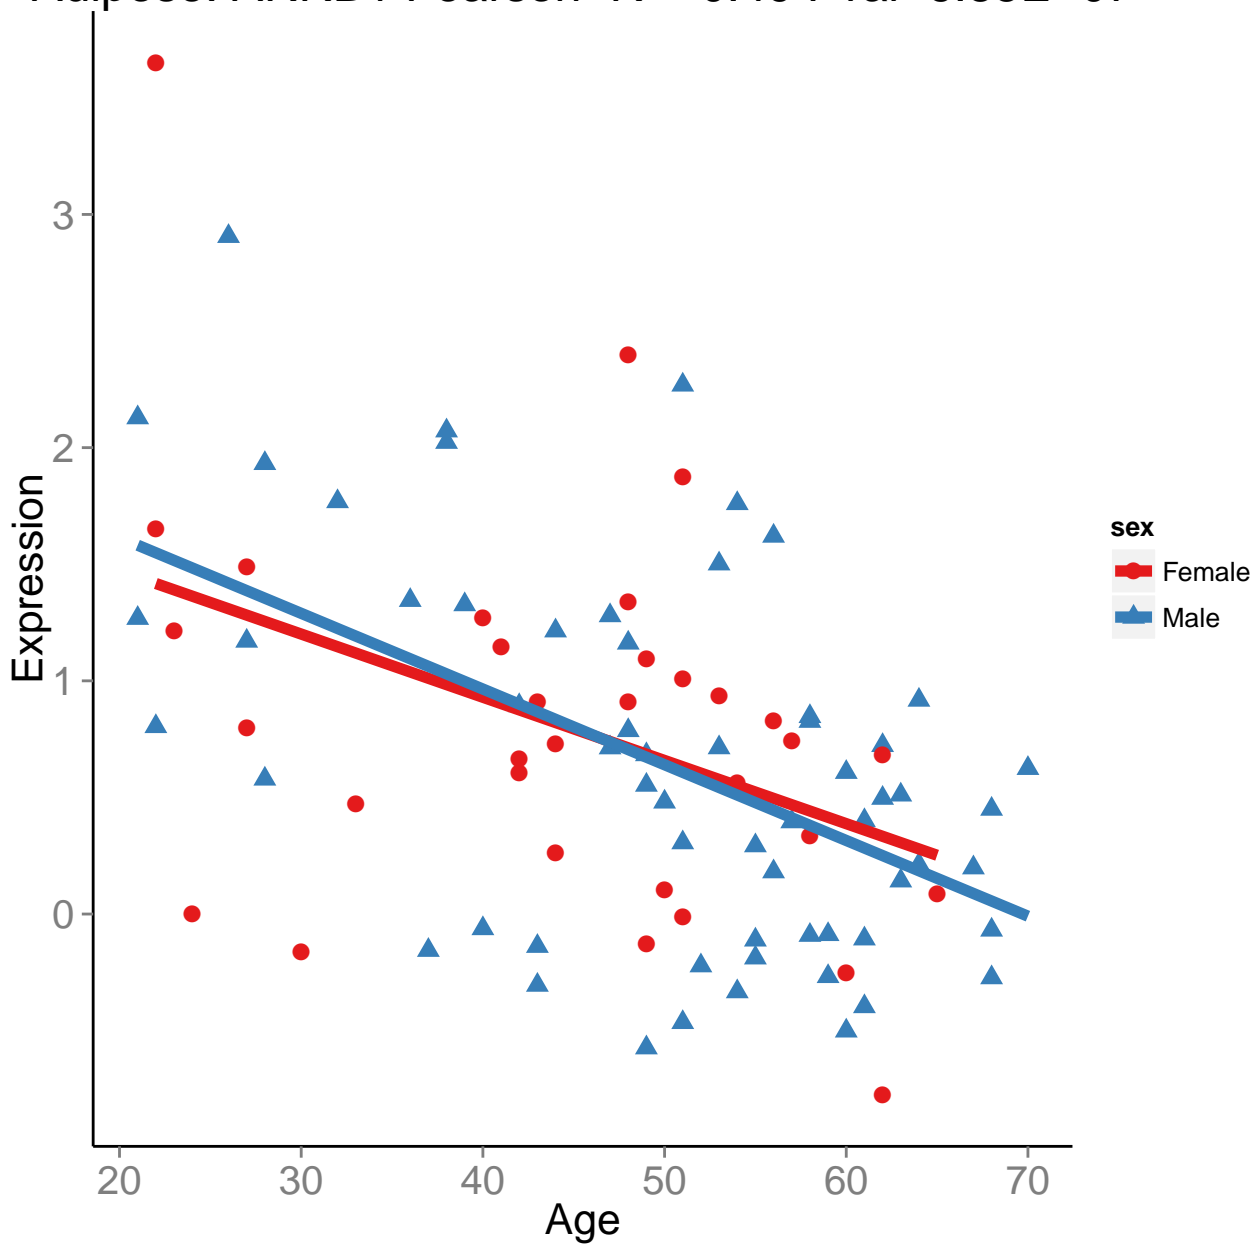

Adipose: AC084031.1 Pearson-R=-0.48 Pval=8.03E-07

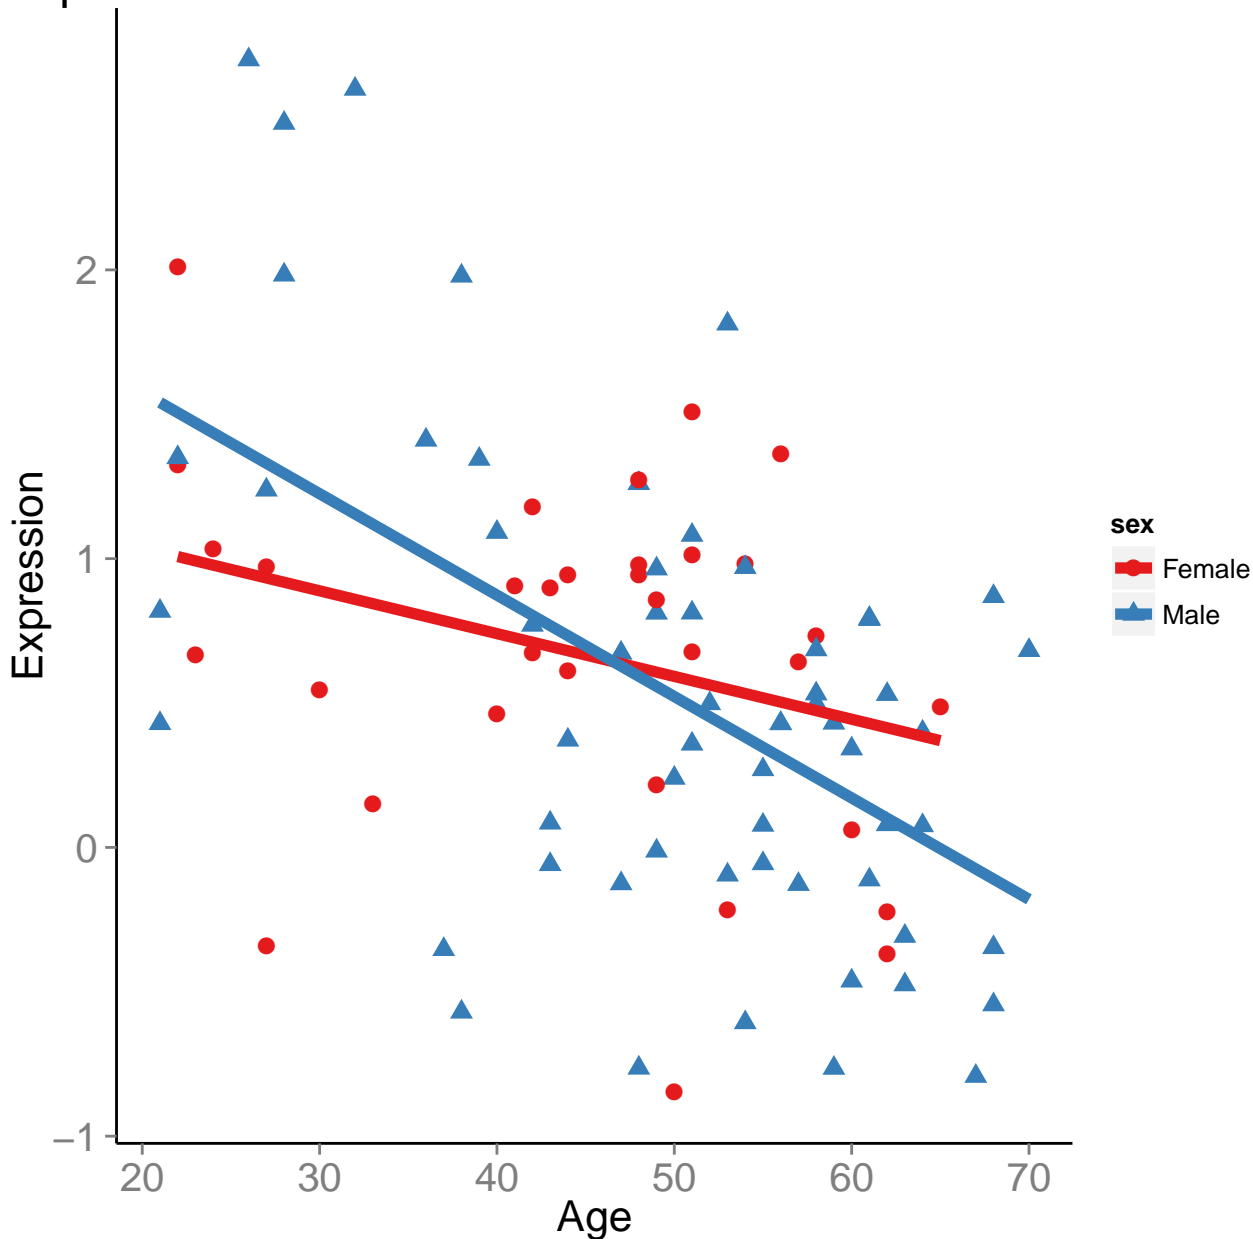



Adipose: IKBKB Pearson-R=0.48 Pval=8.58E-07

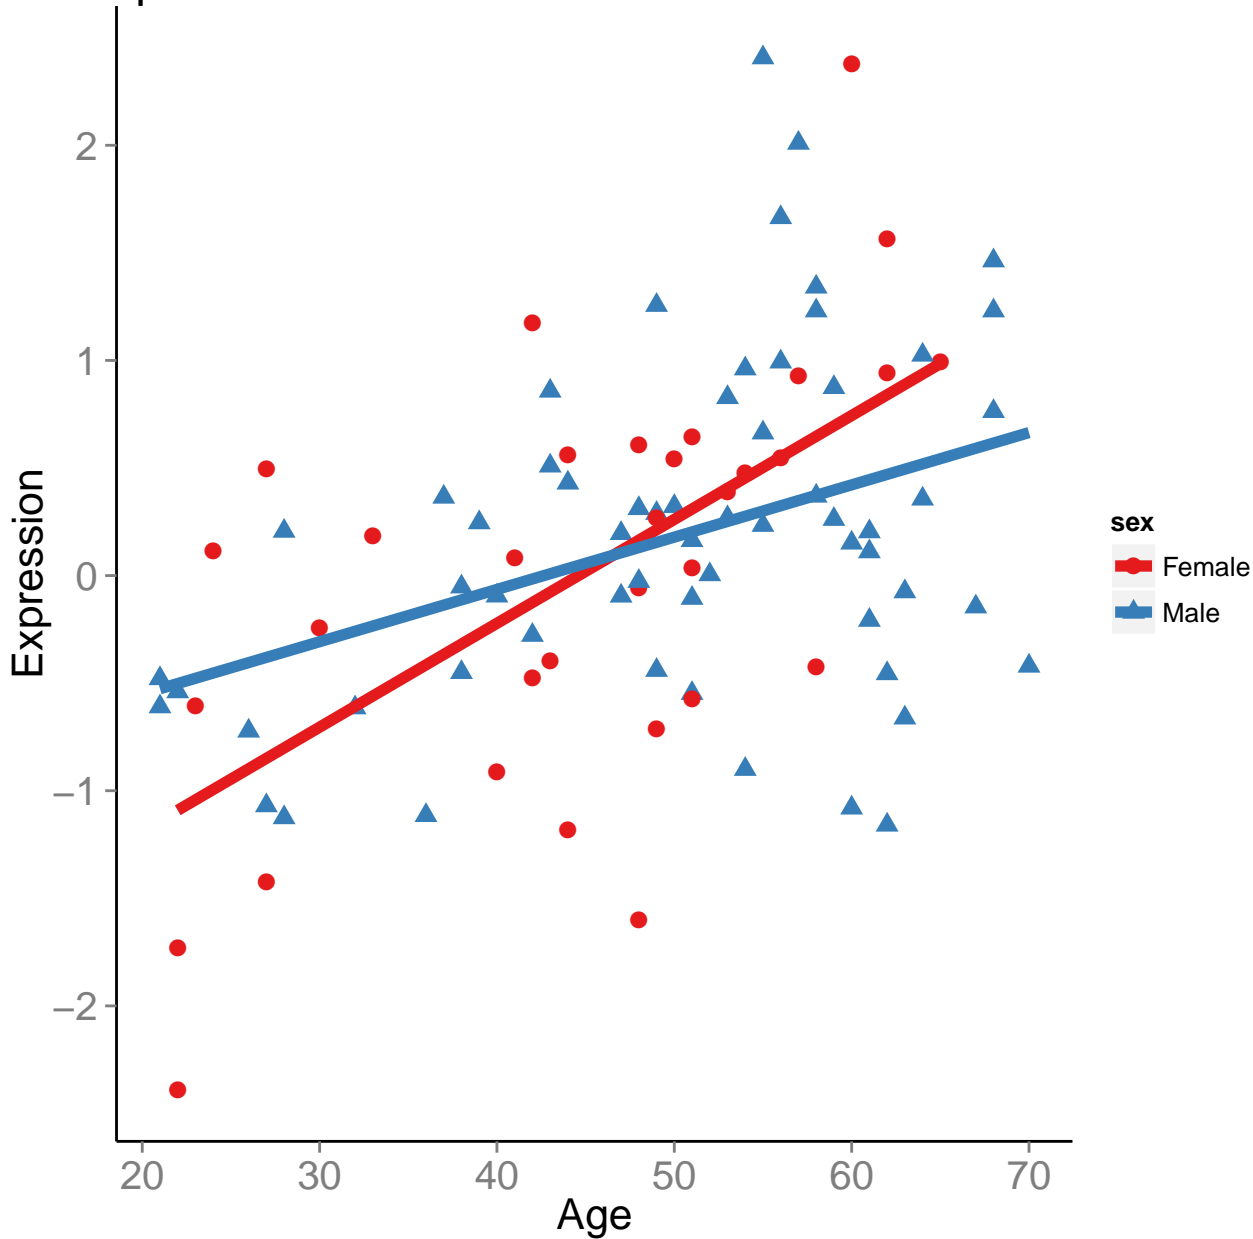

Adipose: LMAN2L Pearson-R=0.48 Pval=8.88E-07

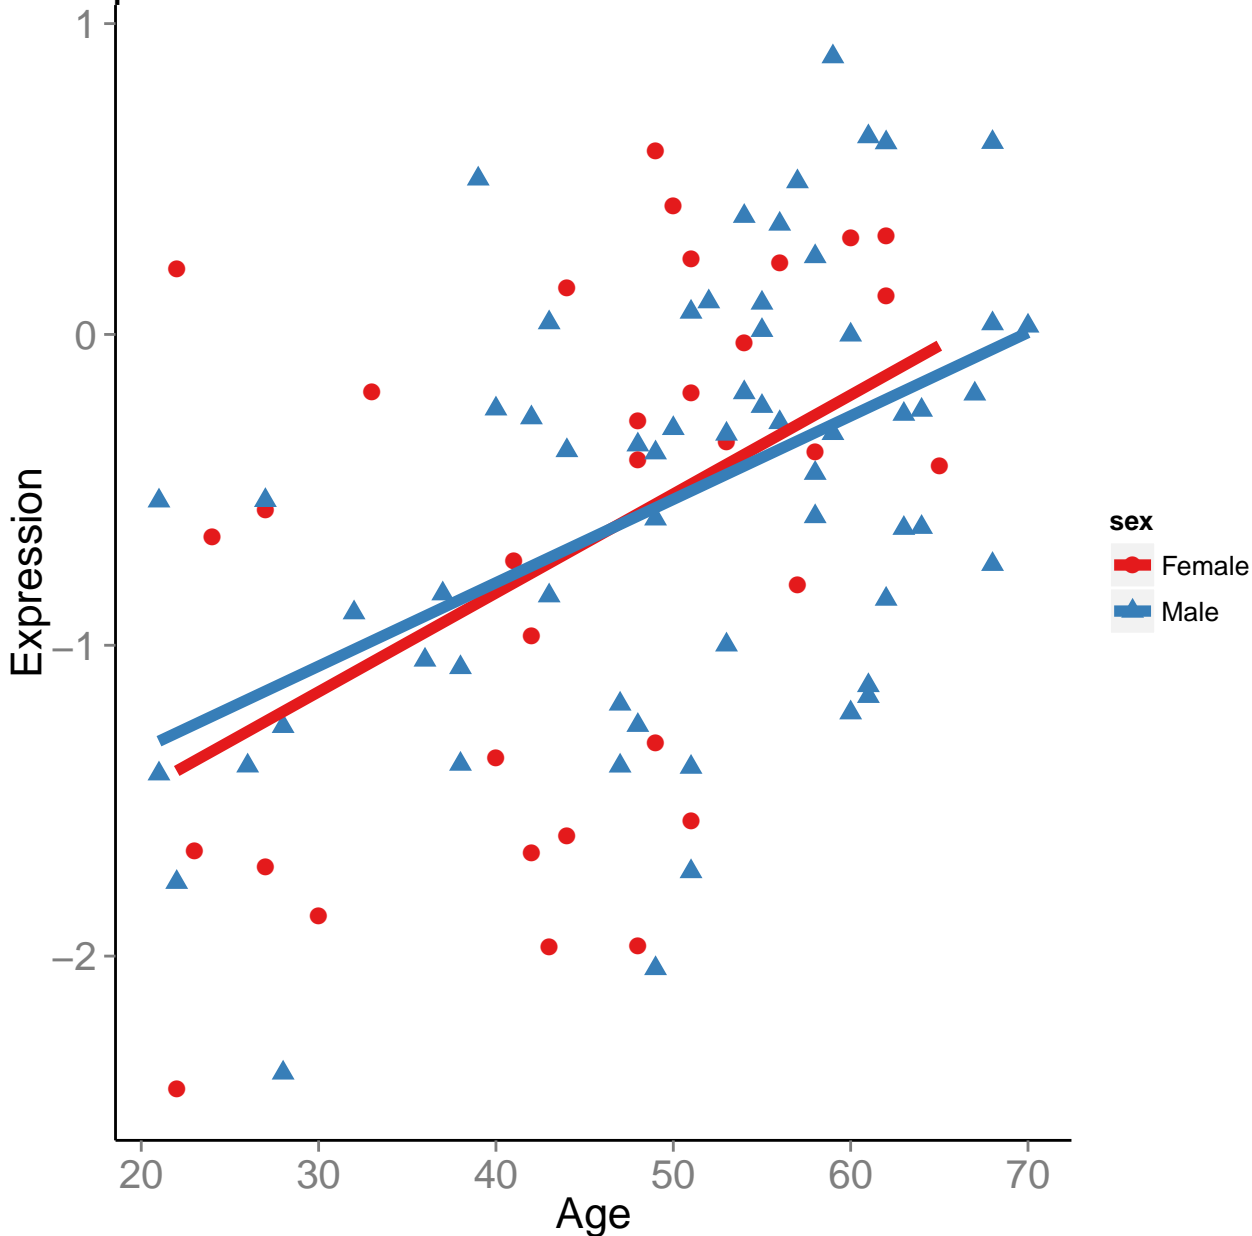

Adipose: MIR22 Pearson-R=-0.48 Pval=8.99E-07

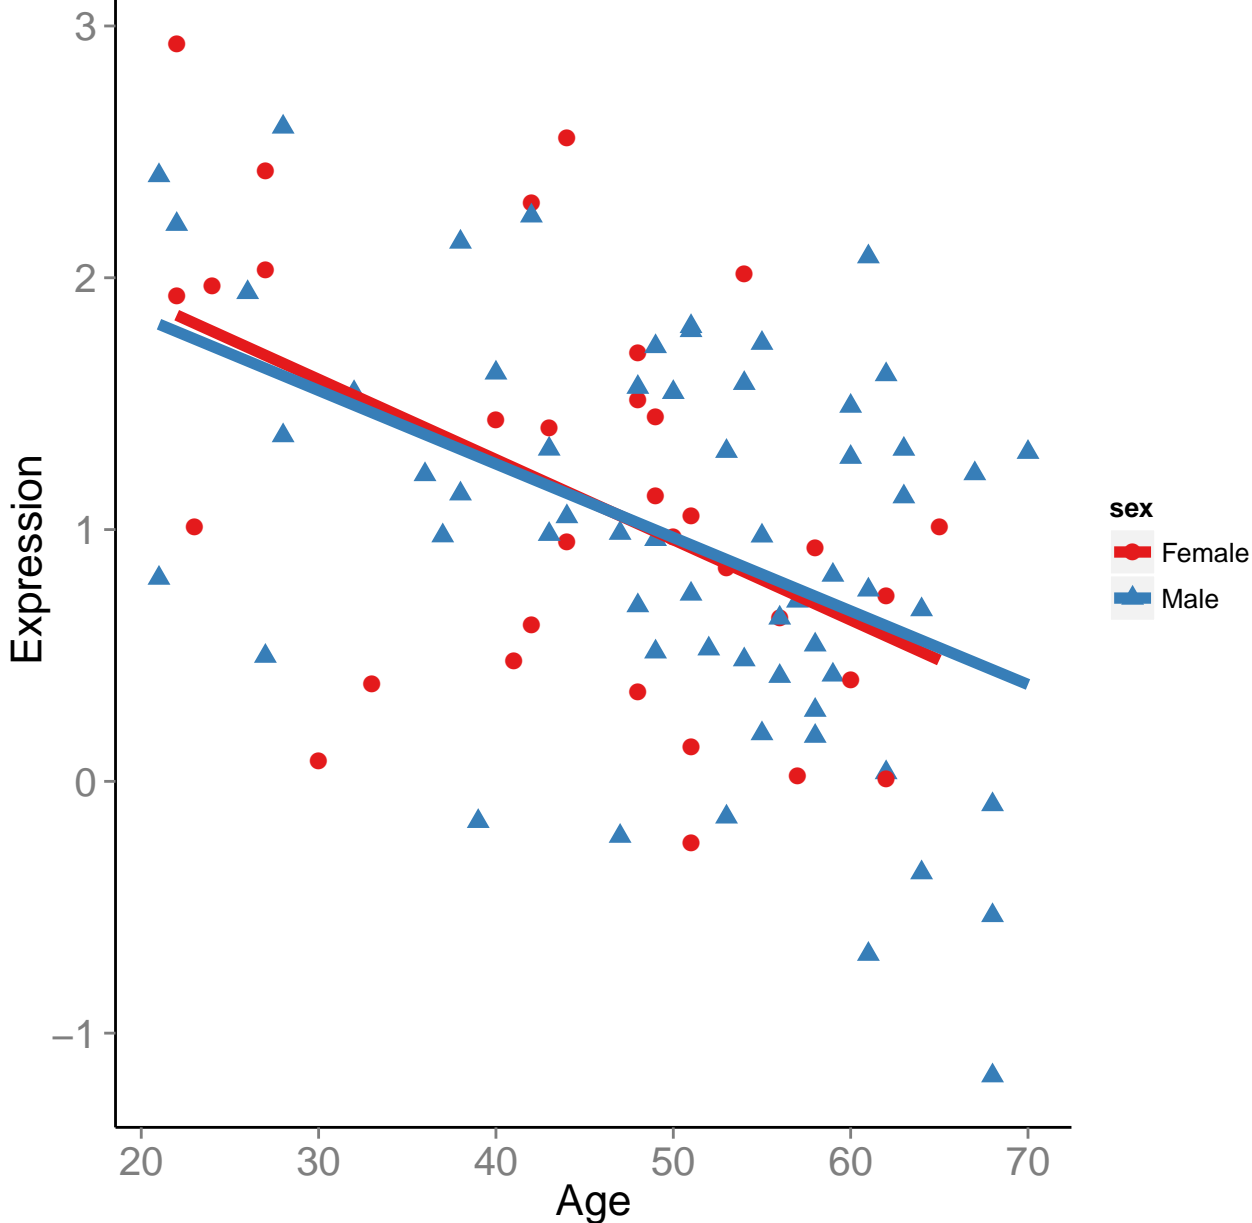

Adipose: FABP4 Pearson-R=-0.48 Pval=9.46E-07

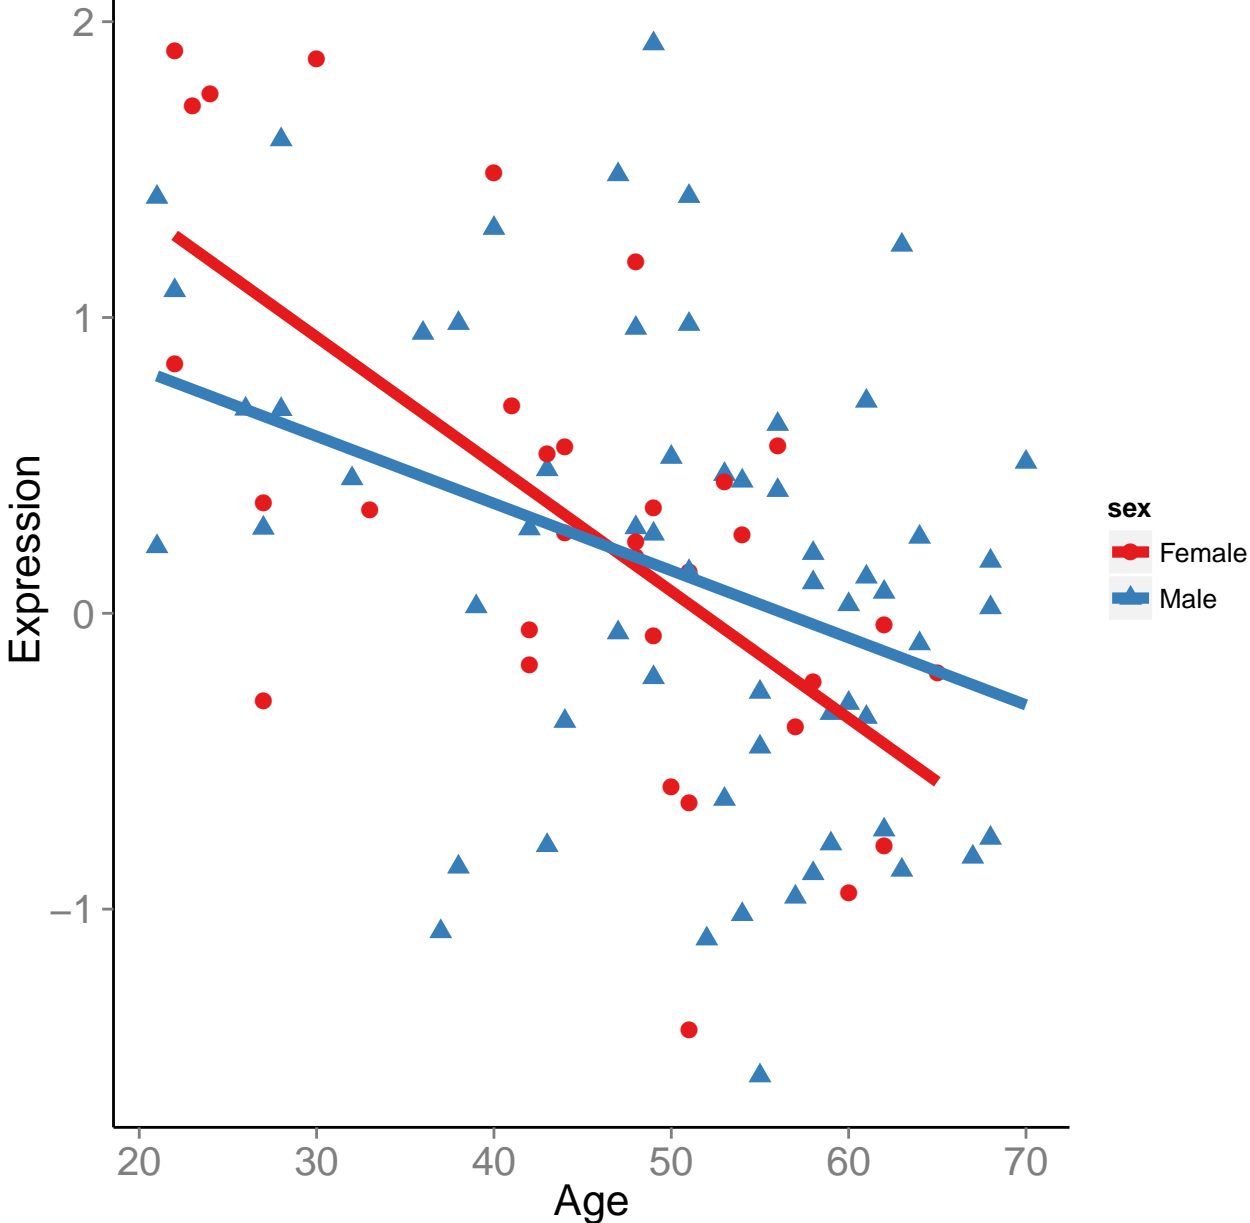

Adipose: DBNL Pearson-R=-0.48 Pval=9.30E-07

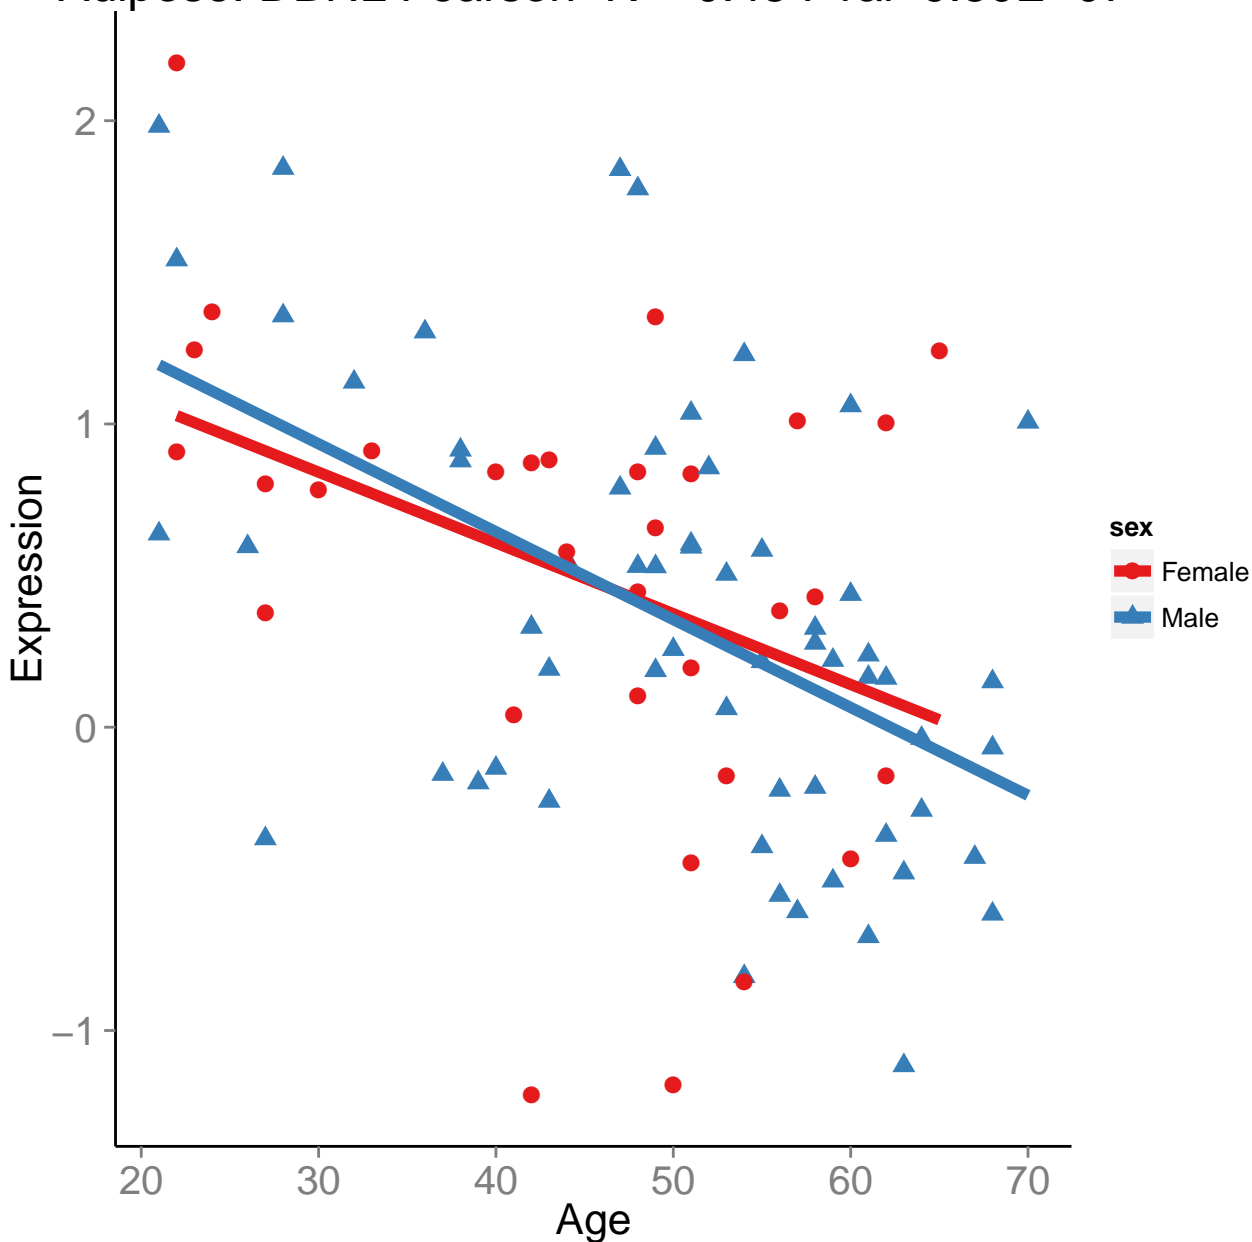

Adipose: BACE2 Pearson-R=0.48 Pval=1.20E-06

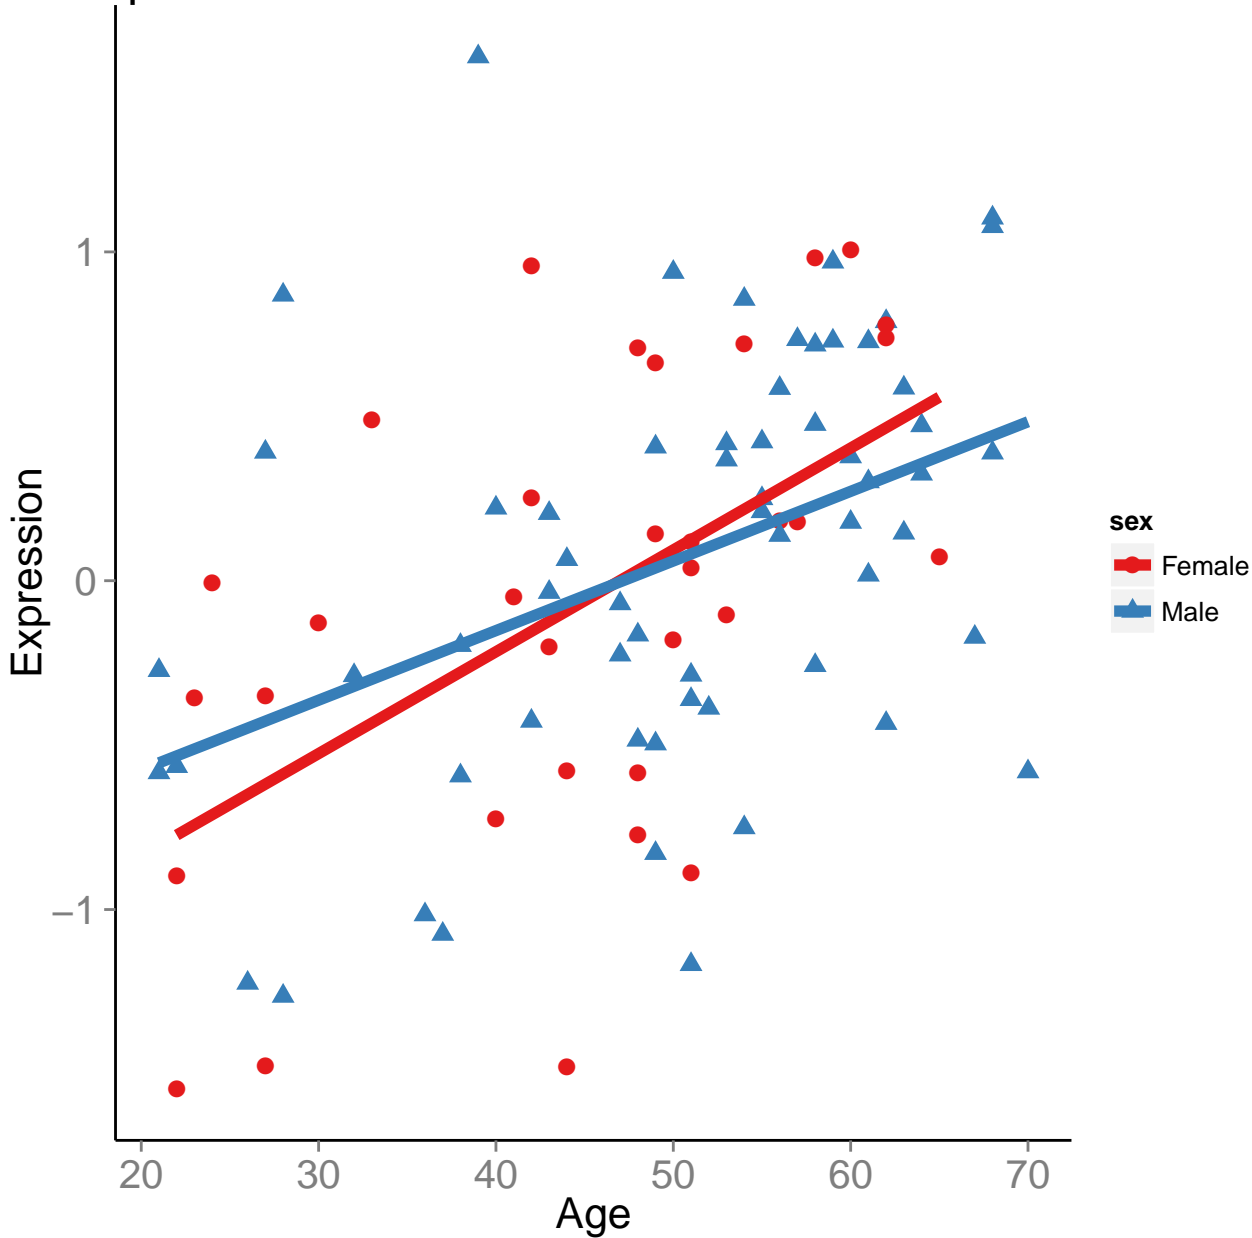

Adipose: NRN1L Pearson-R=0.47 Pval=1.40E-06

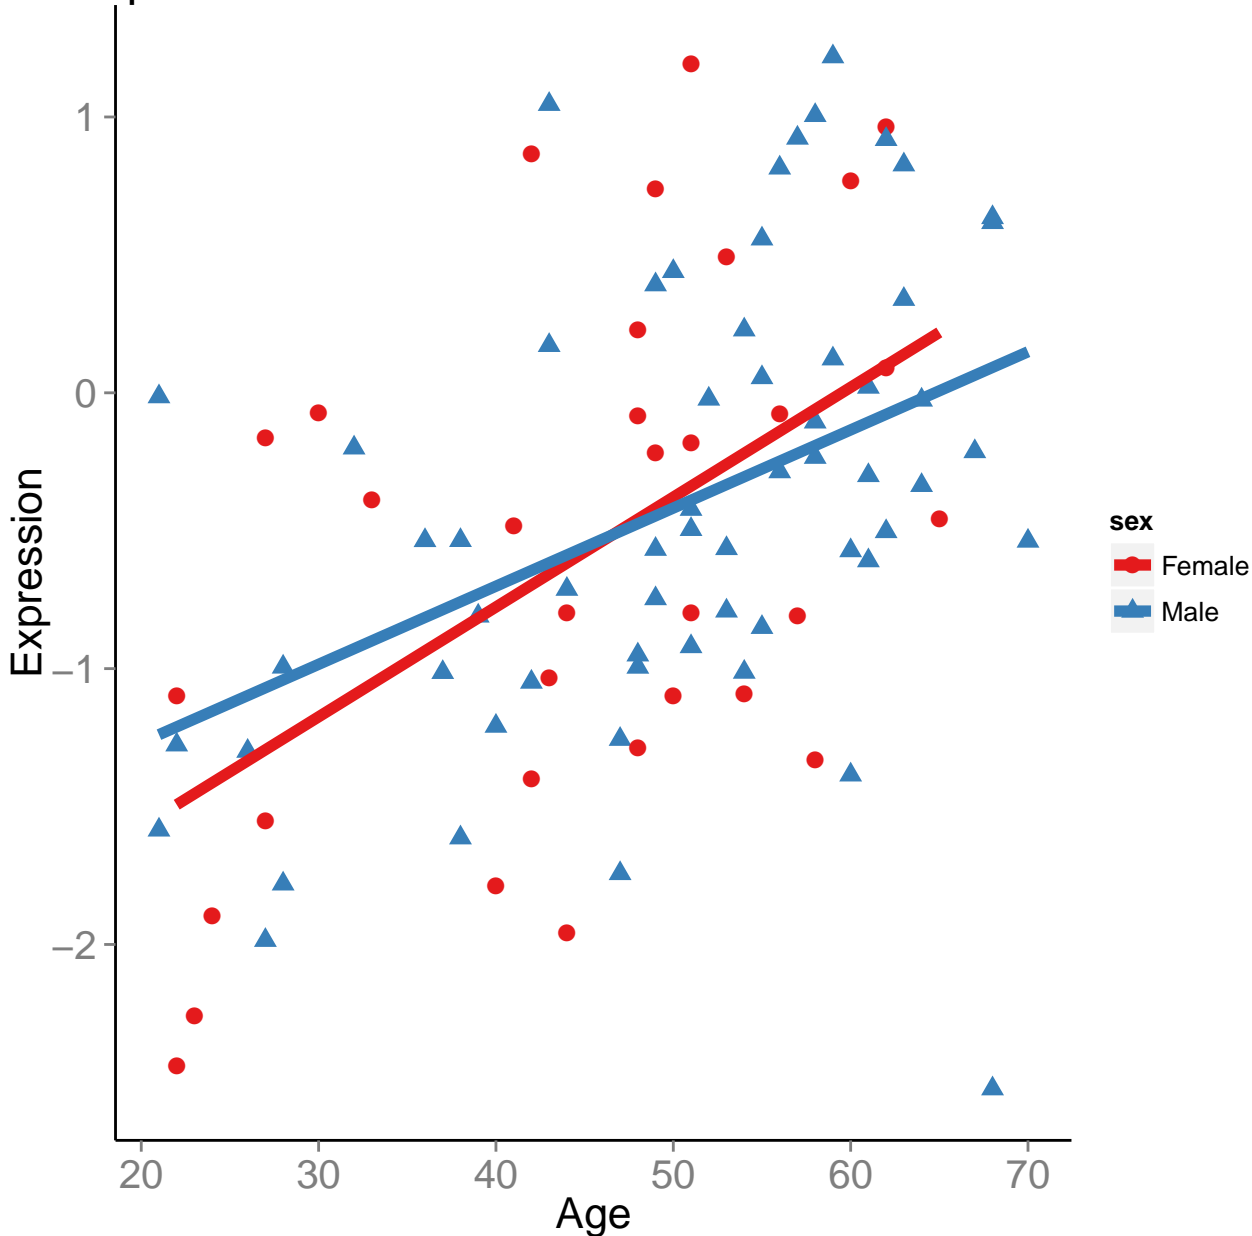

Adipose: HSF4 Pearson-R=0.47 Pval=1.39E-06

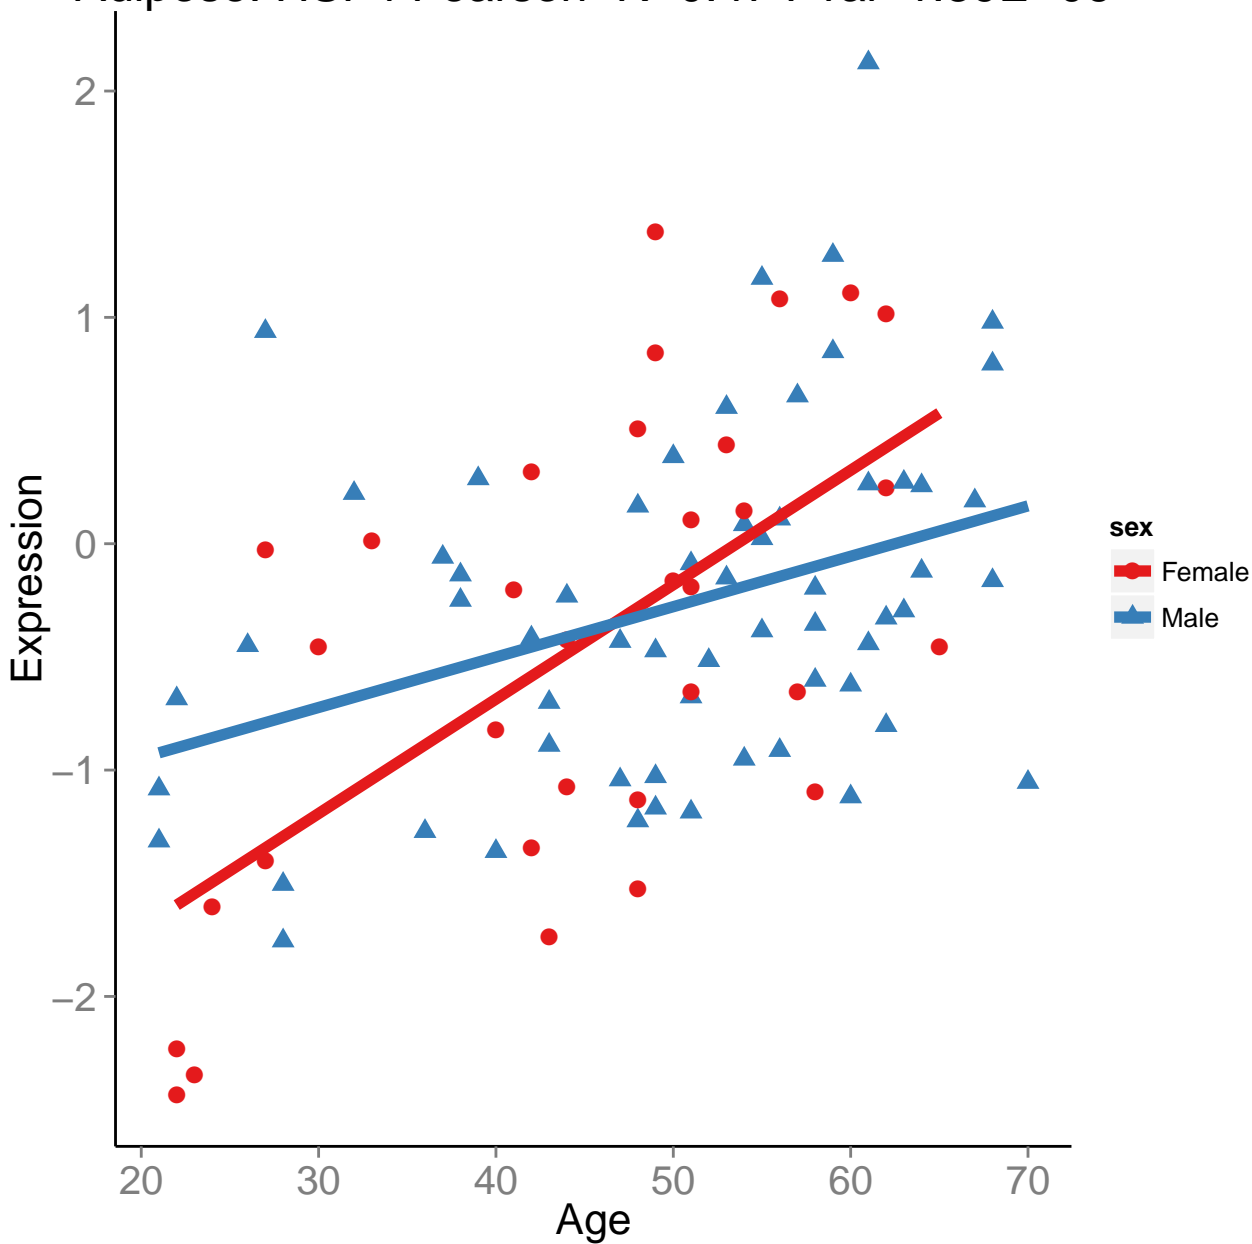



Adipose: ALAS1 Pearson-R=-0.48 Pval=1.25E-06

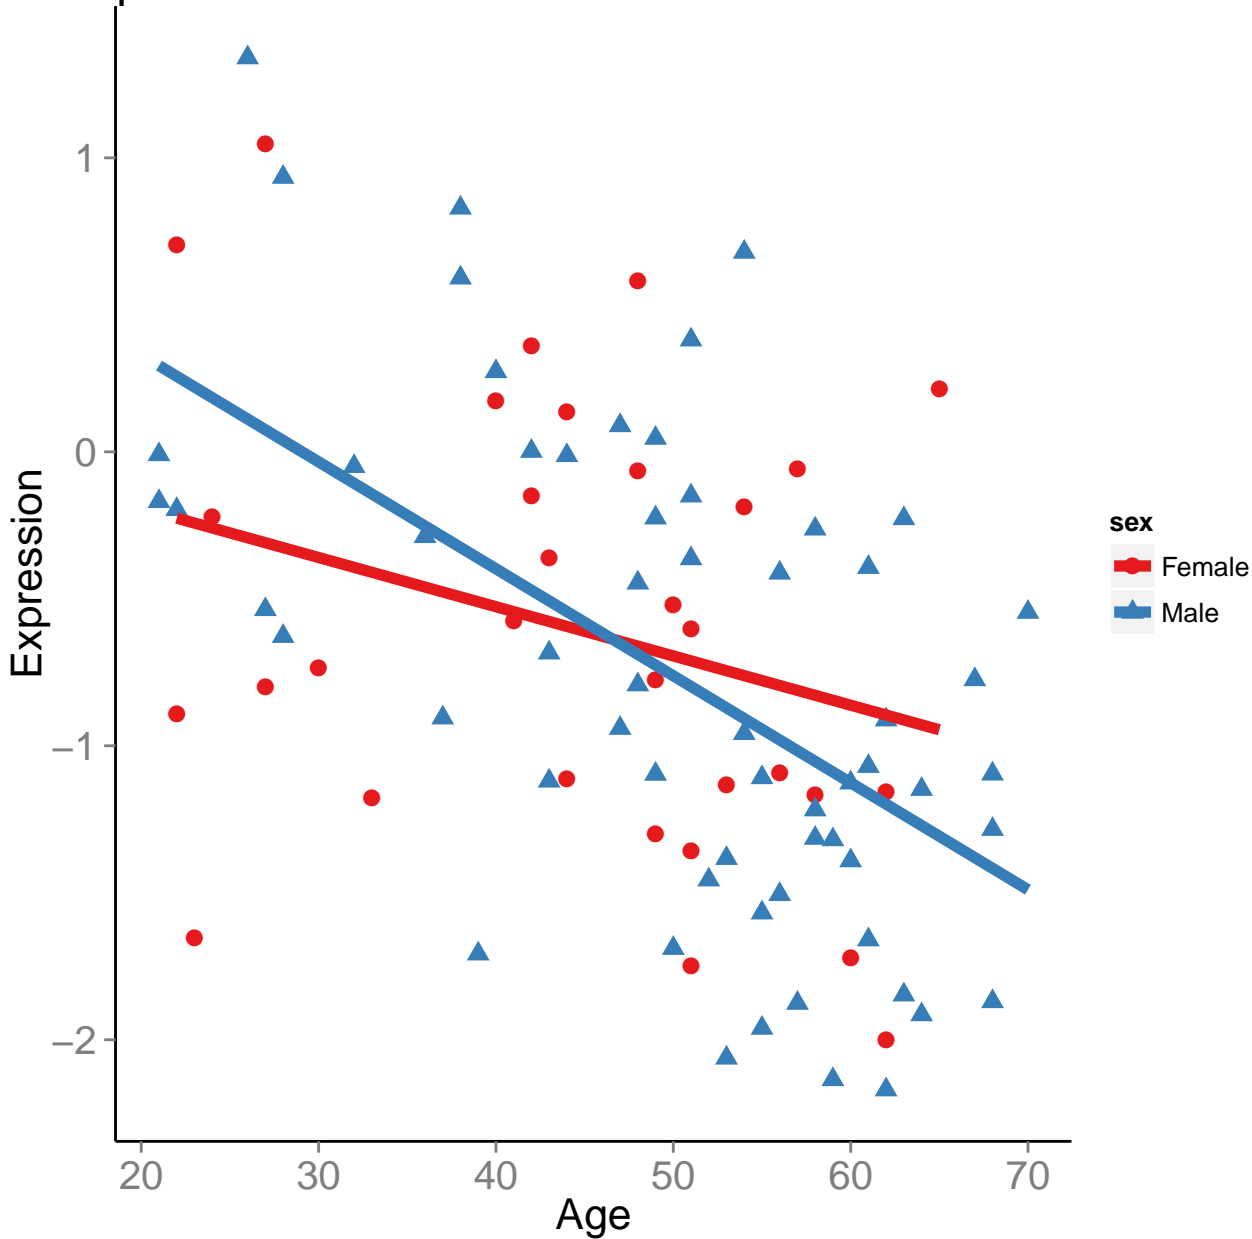

Adipose: G0S2 Pearson-R=-0.47 Pval=1.42E-06

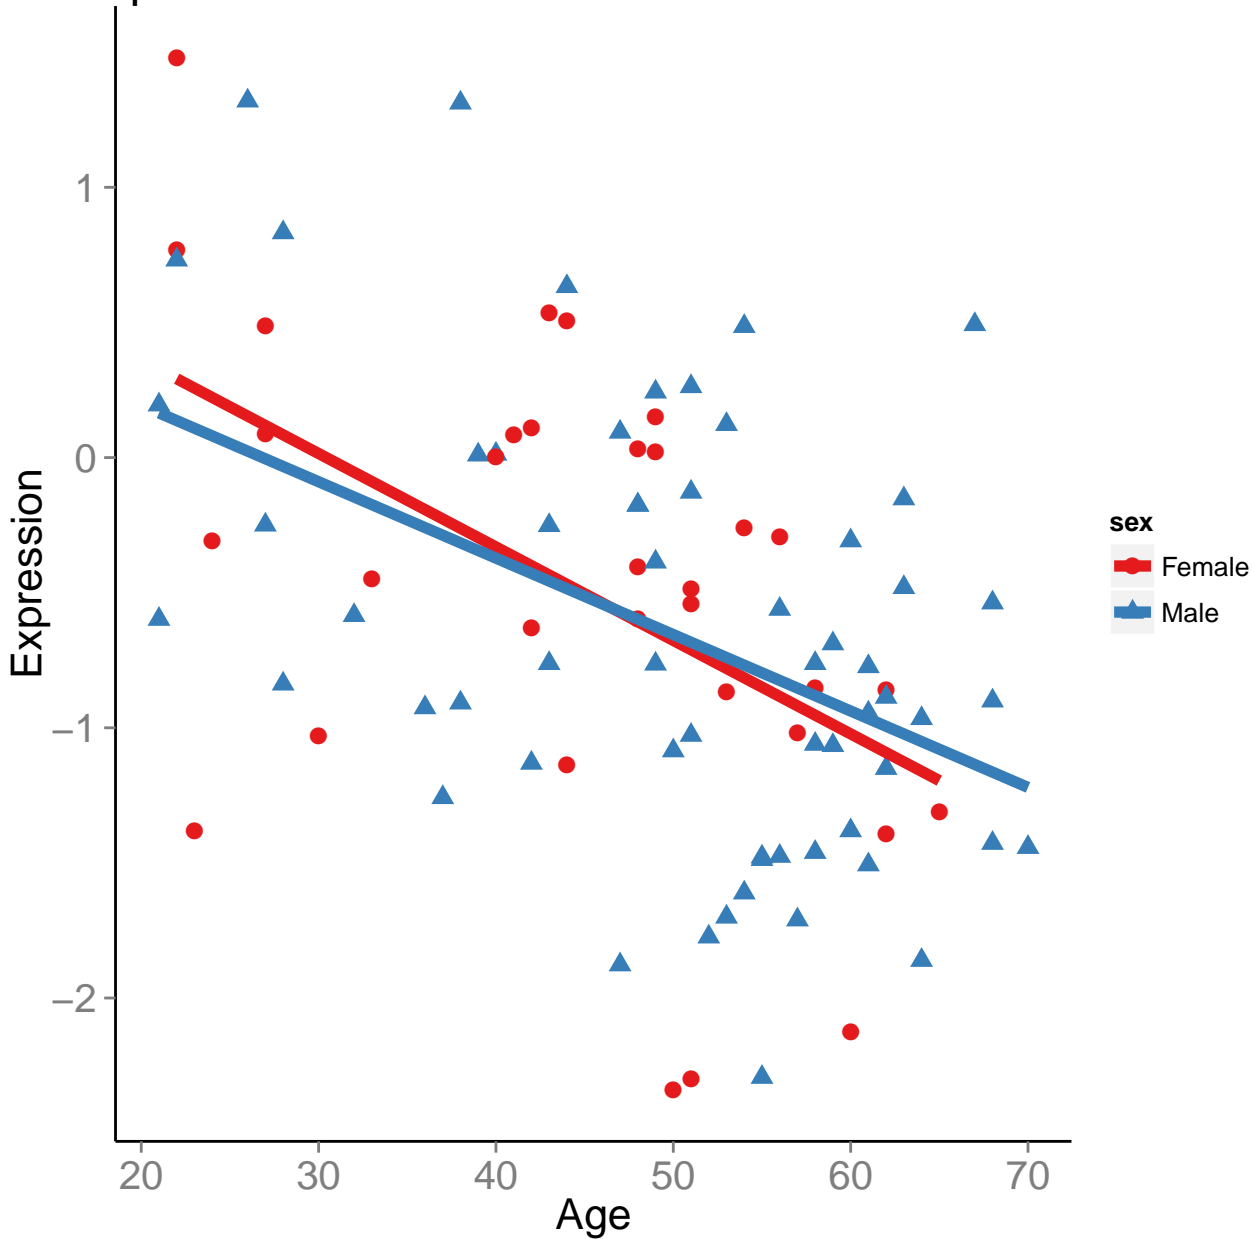

Adipose: PTGER3 Pearson-R=-0.47 Pval=1.40E-06

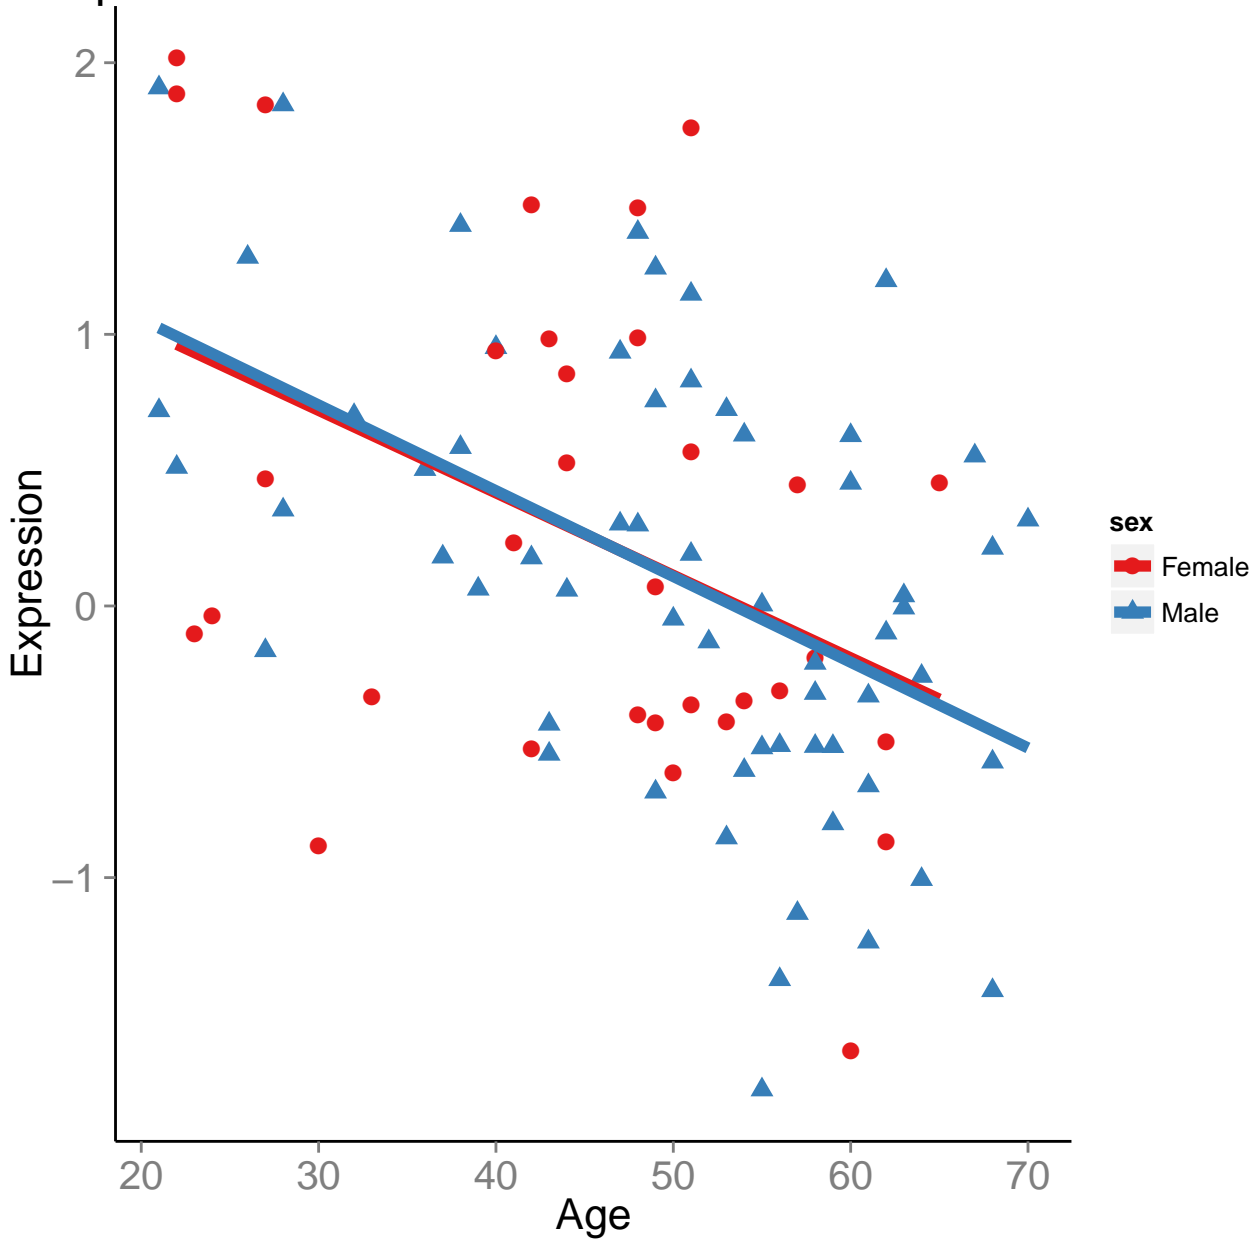

Adipose: BLCAP Pearson-R=-0.47 Pval=1.35E-06

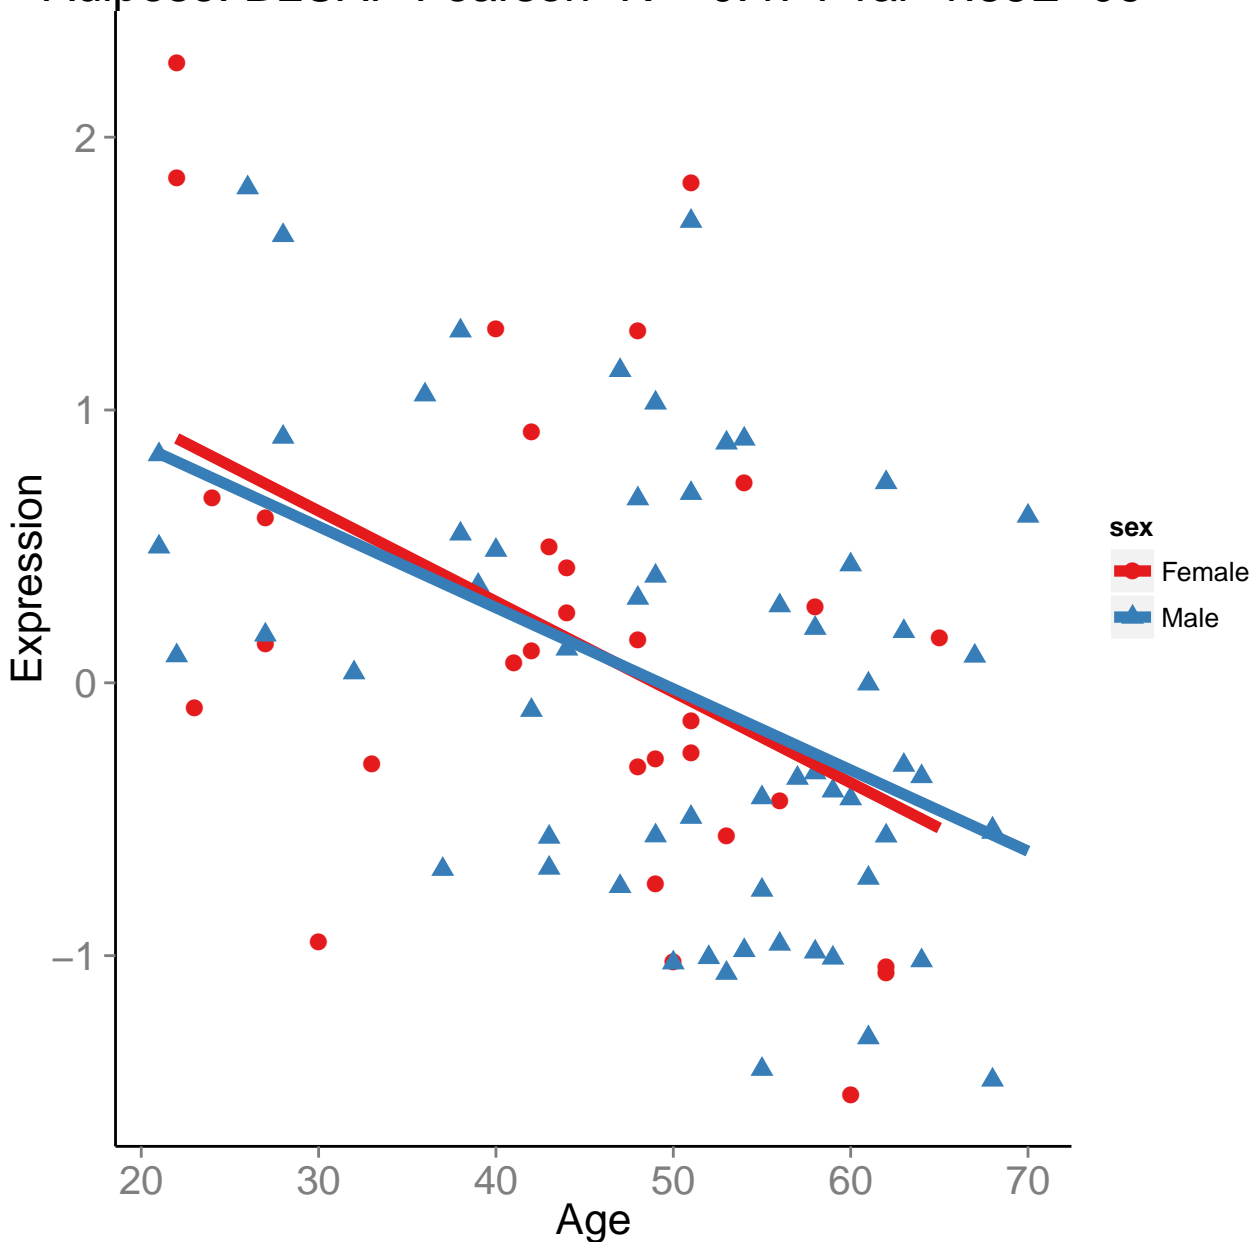

Adipose: RAC3 Pearson-R=-0.48 Pval=1.31E-06

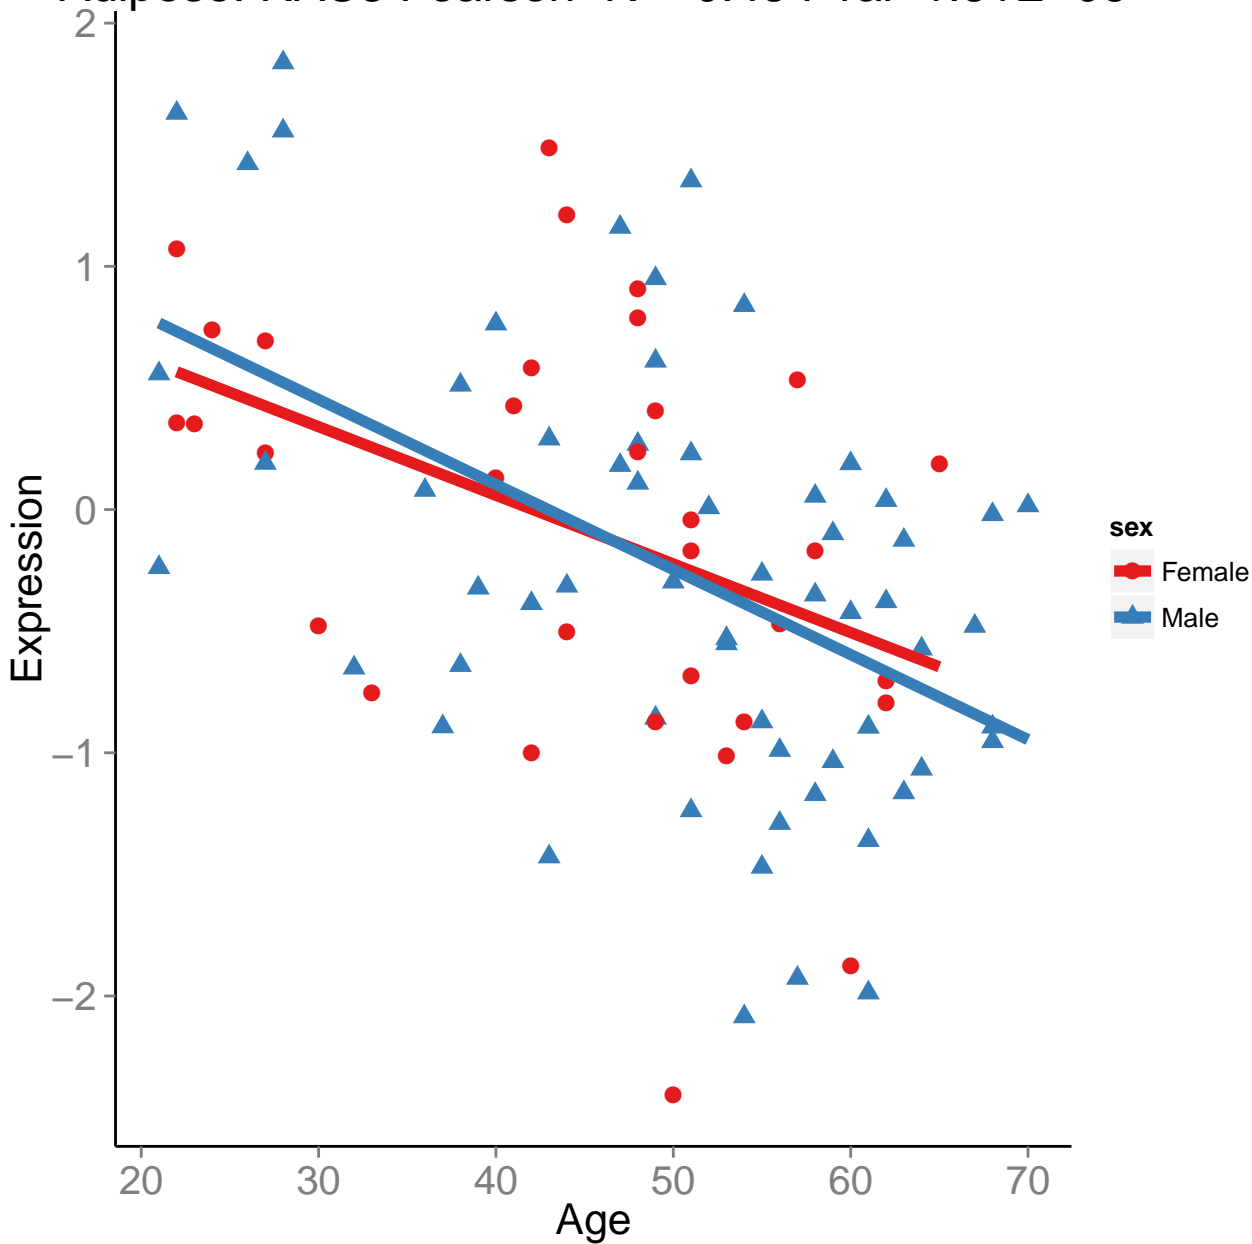

Adipose: IMPDH1 Pearson-R=-0.48 Pval=1.27E-06

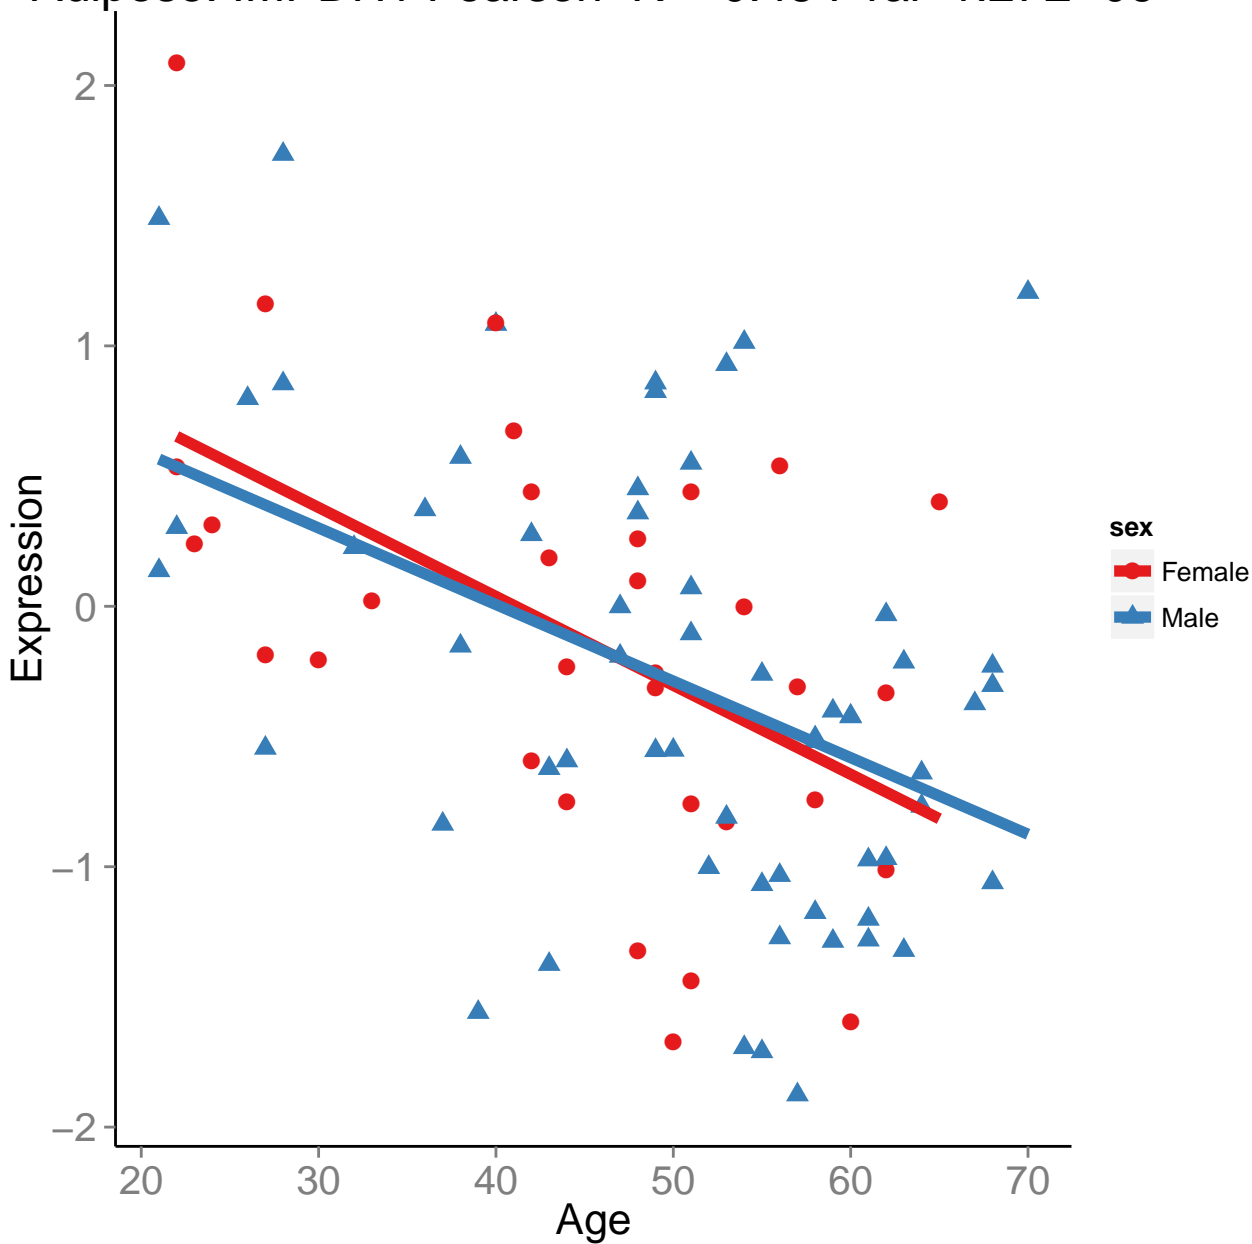

Adipose: CSPG4 Pearson-R=-0.47 Pval=1.34E-06

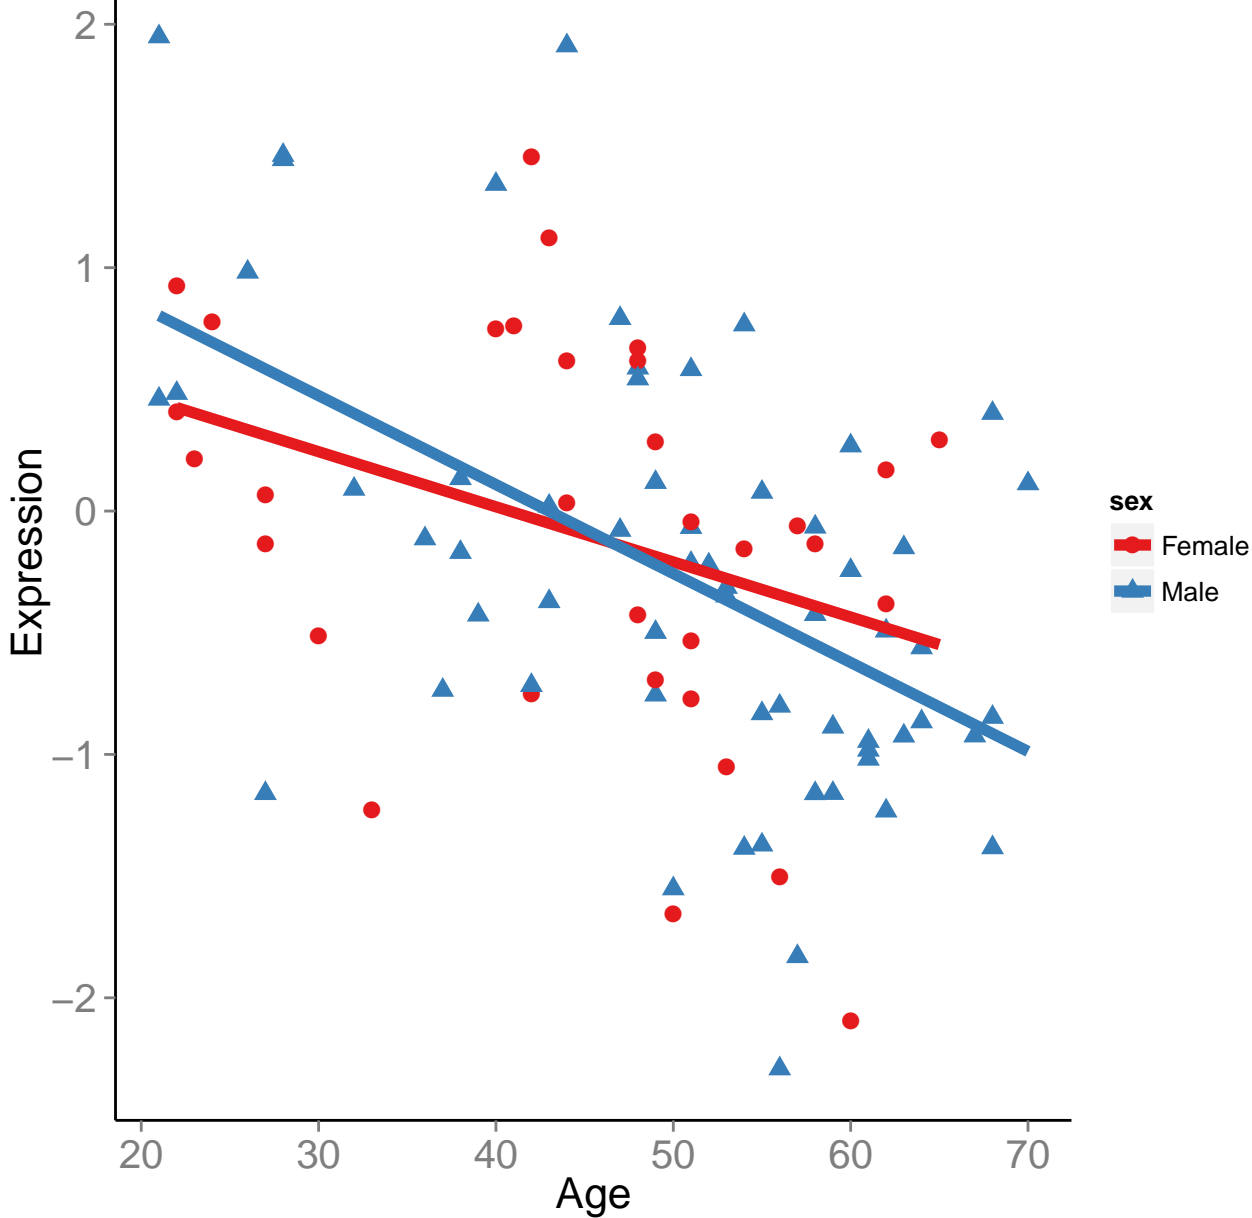

Adipose: MYOF Pearson-R=0.47 Pval=1.47E-06

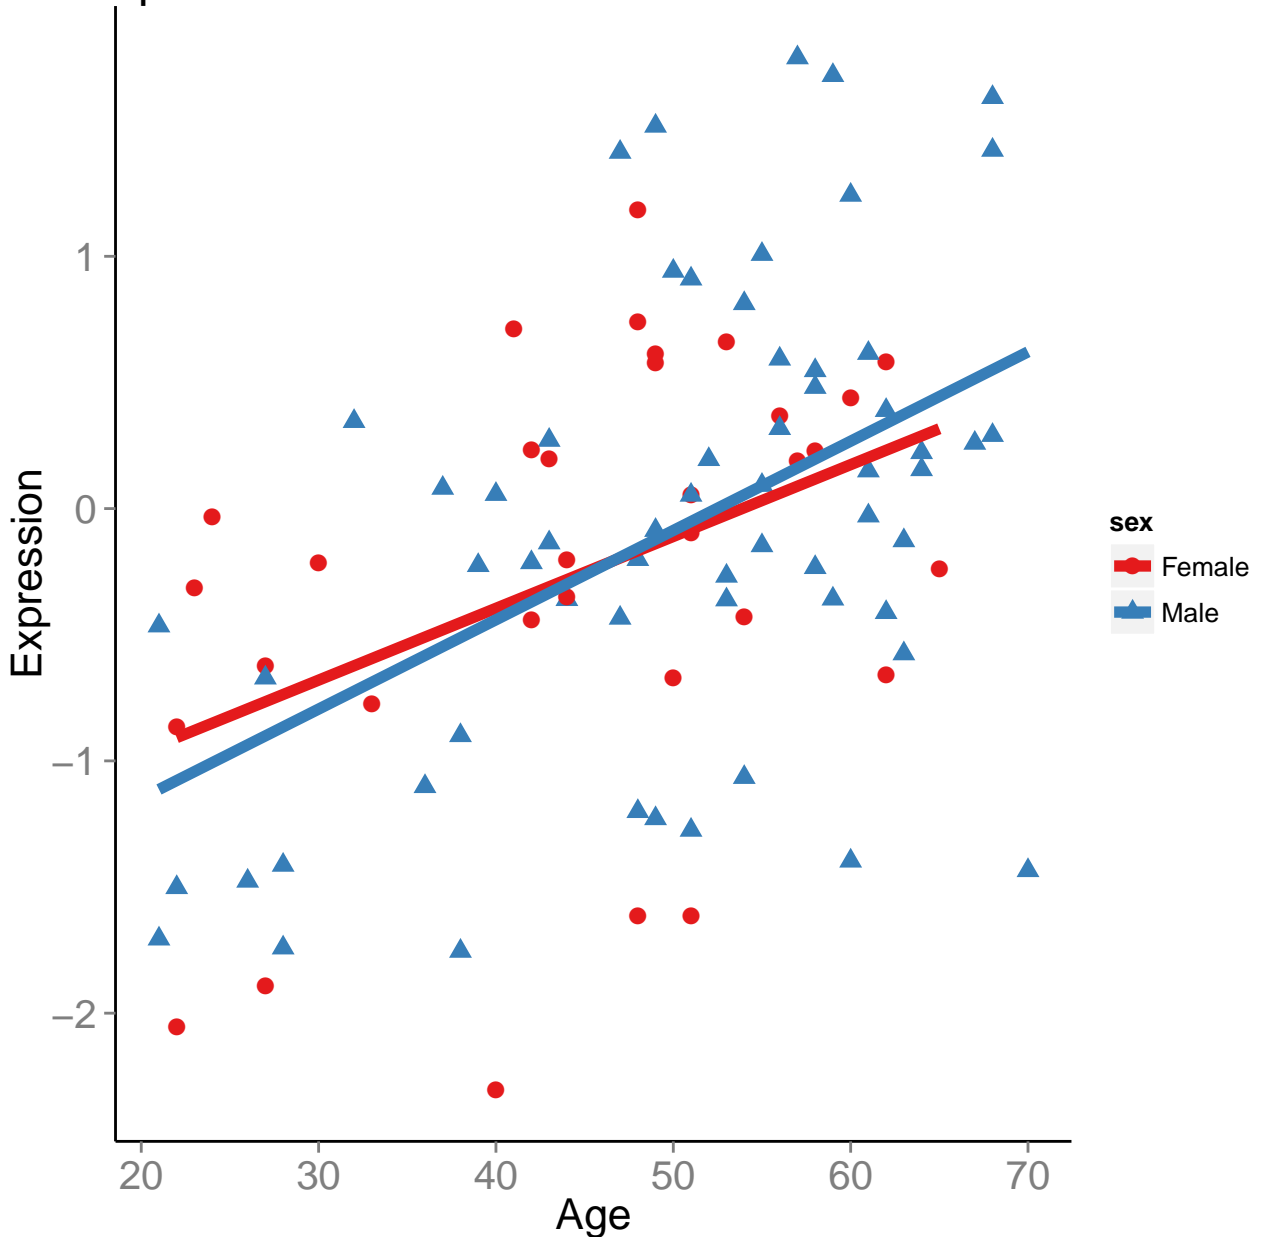



Adipose: UQCR11 Pearson-R=-0.47 Pval=1.57E-06

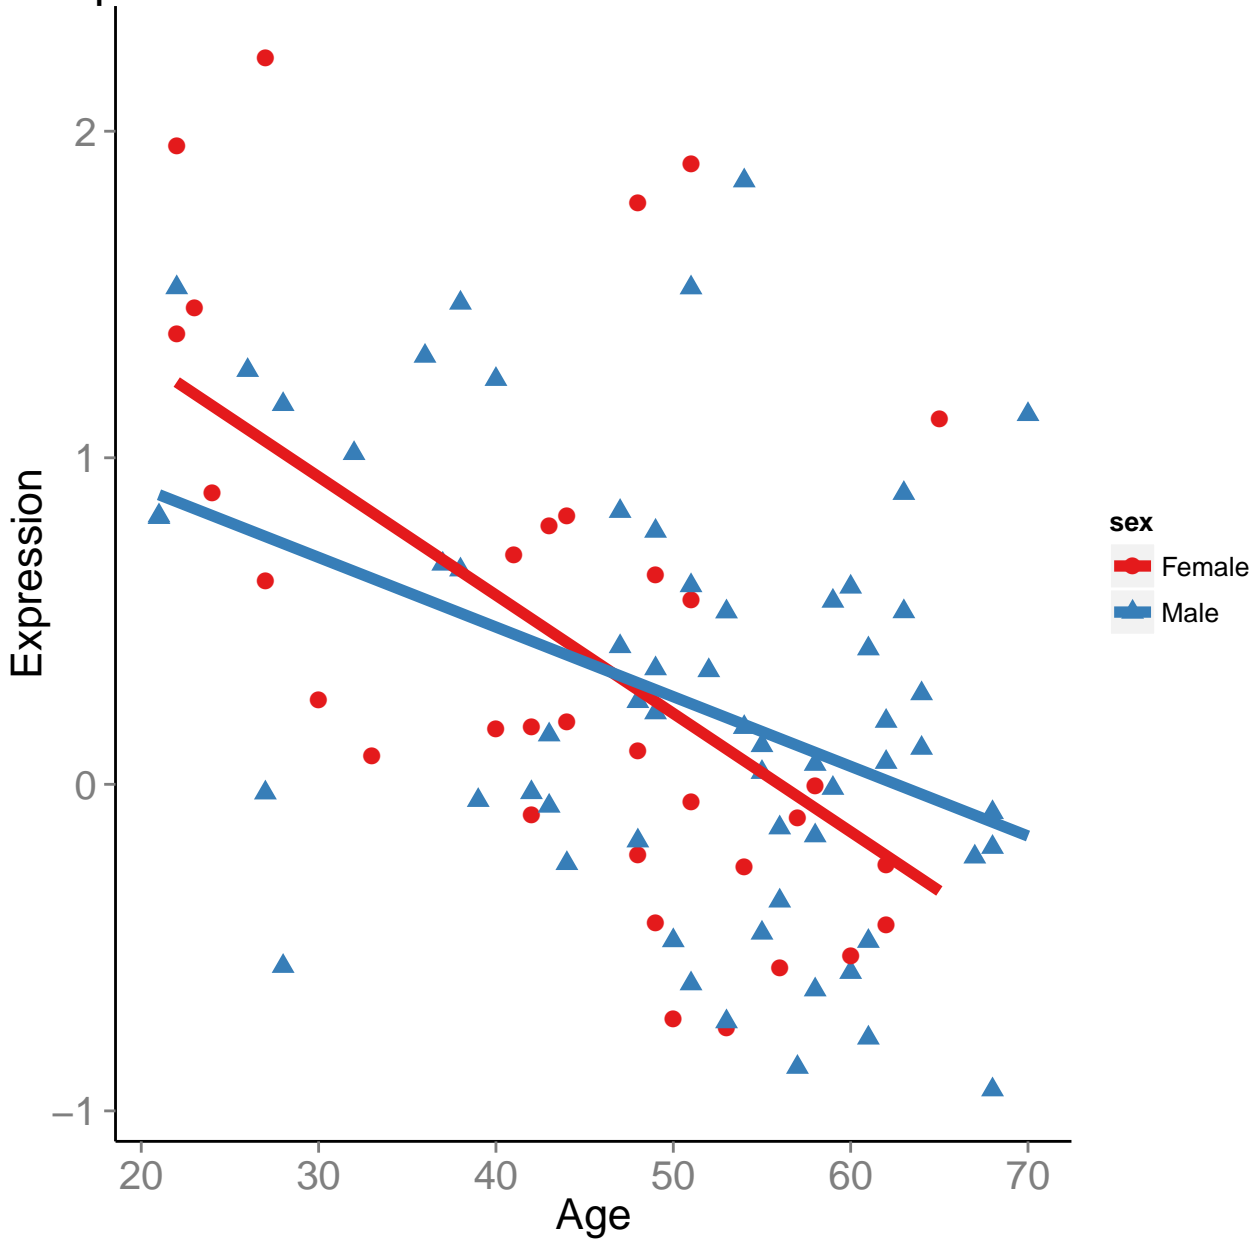

Adipose: AC122179.1 Pearson-R=0.47 Pval=1.60E-06

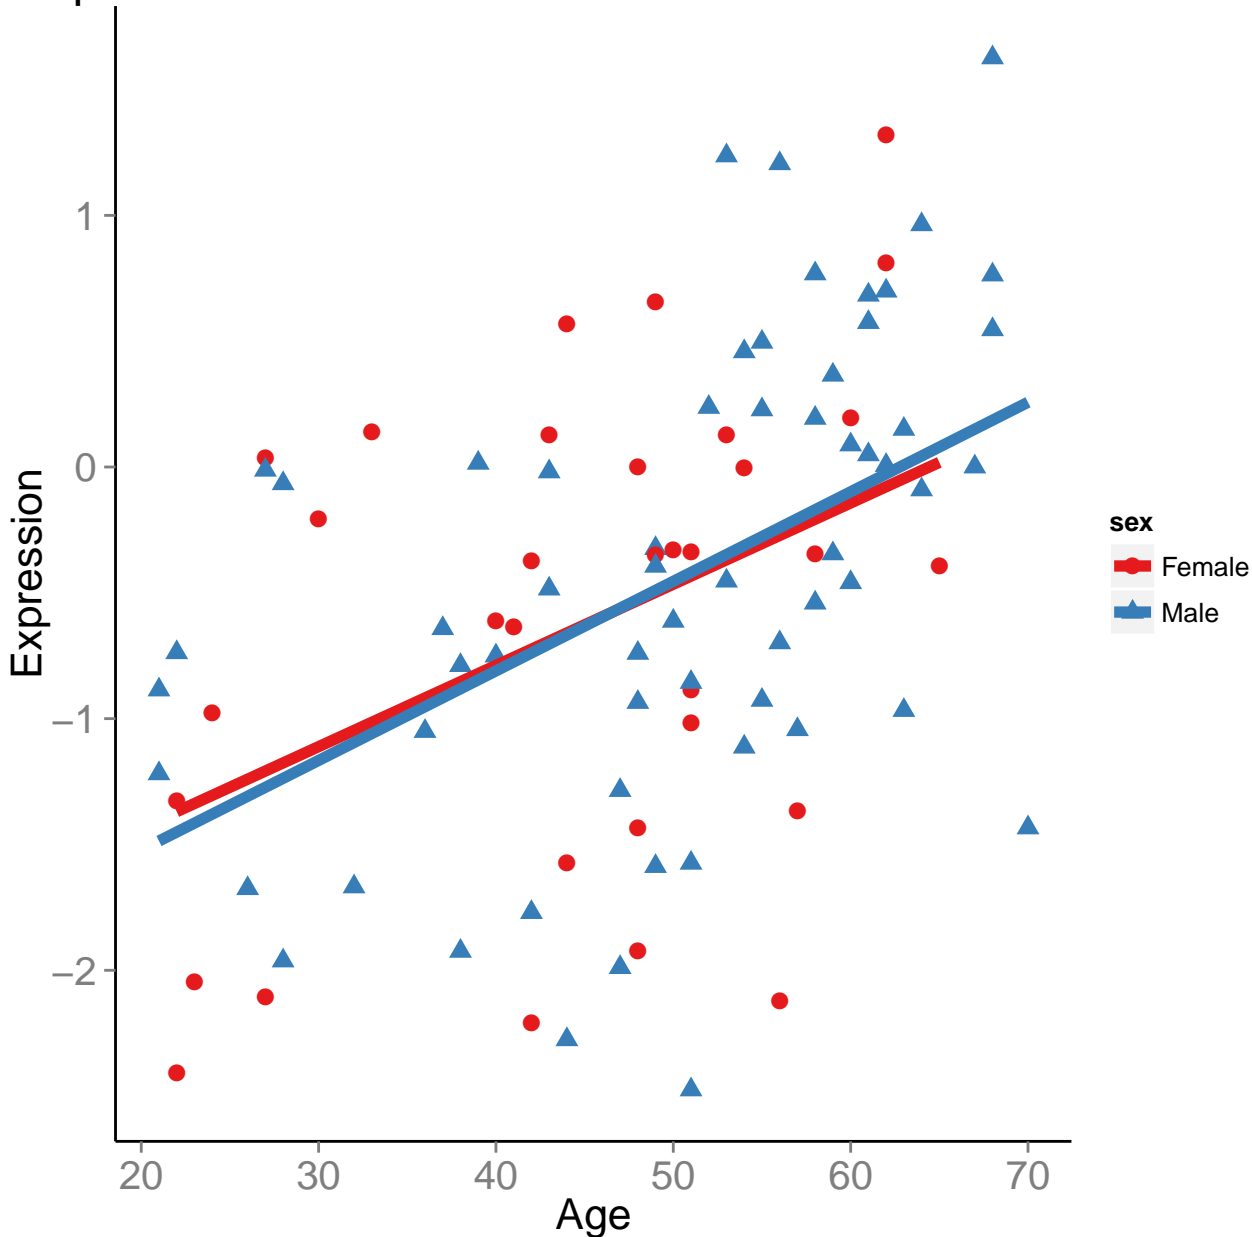

Adipose: HADH Pearson-R=-0.47 Pval=1.65E-06

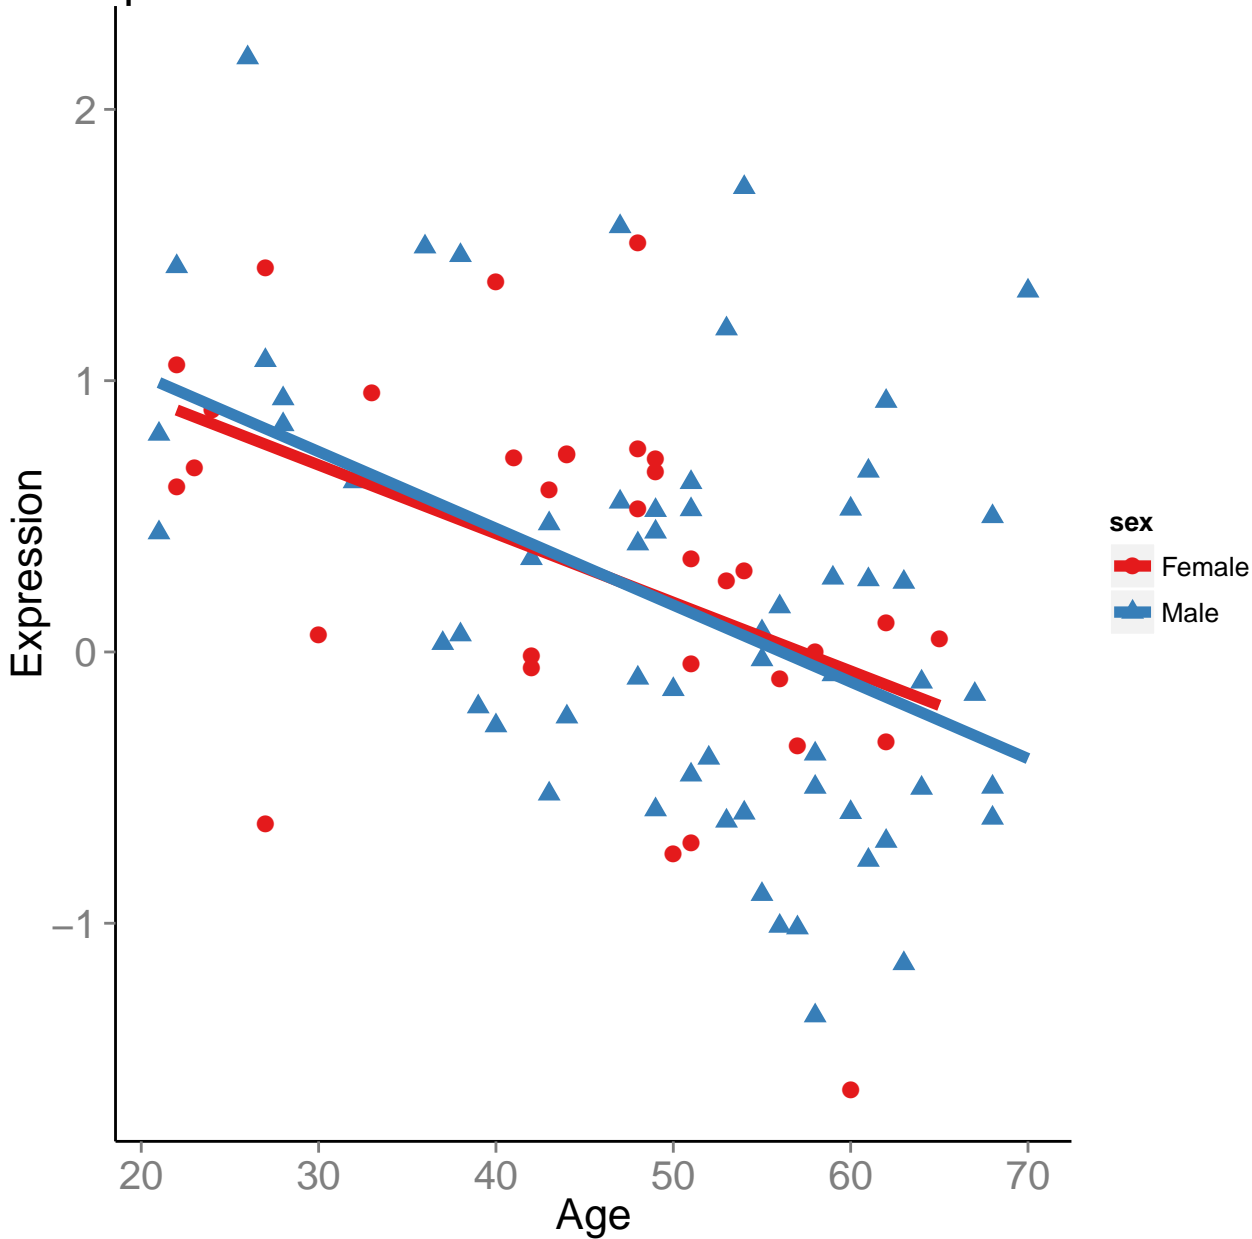

Adipose: PFDN2 Pearson-R=-0.47 Pval=1.74E-06

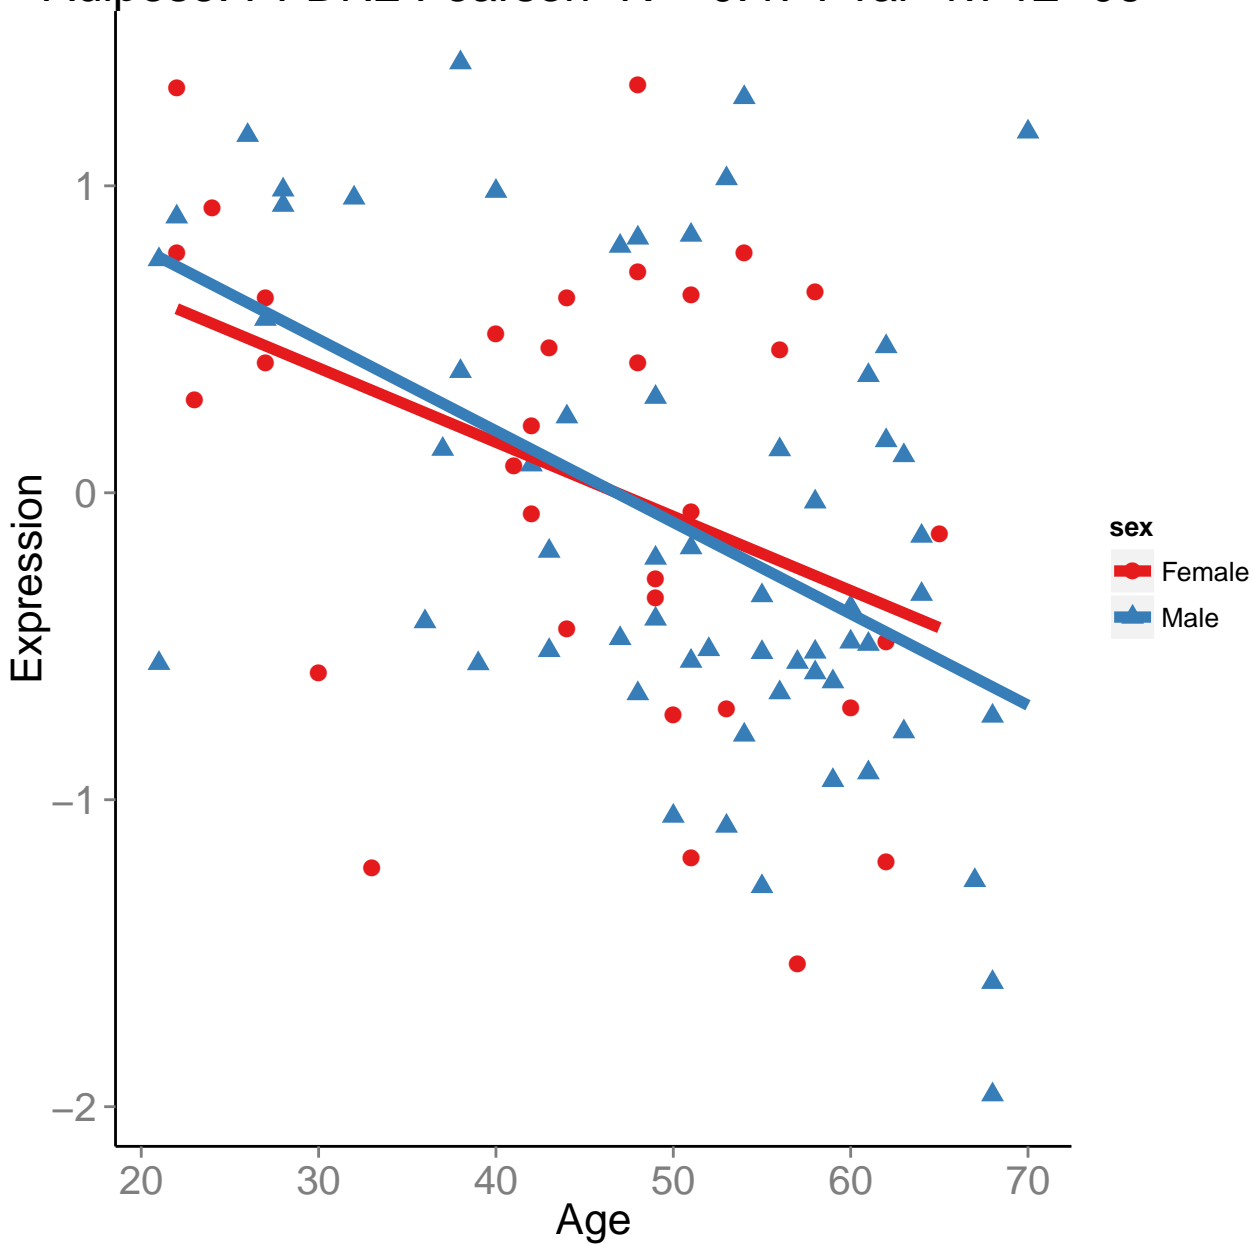

Adipose: AC025335.1 Pearson-R=0.47 Pval=1.71E-06

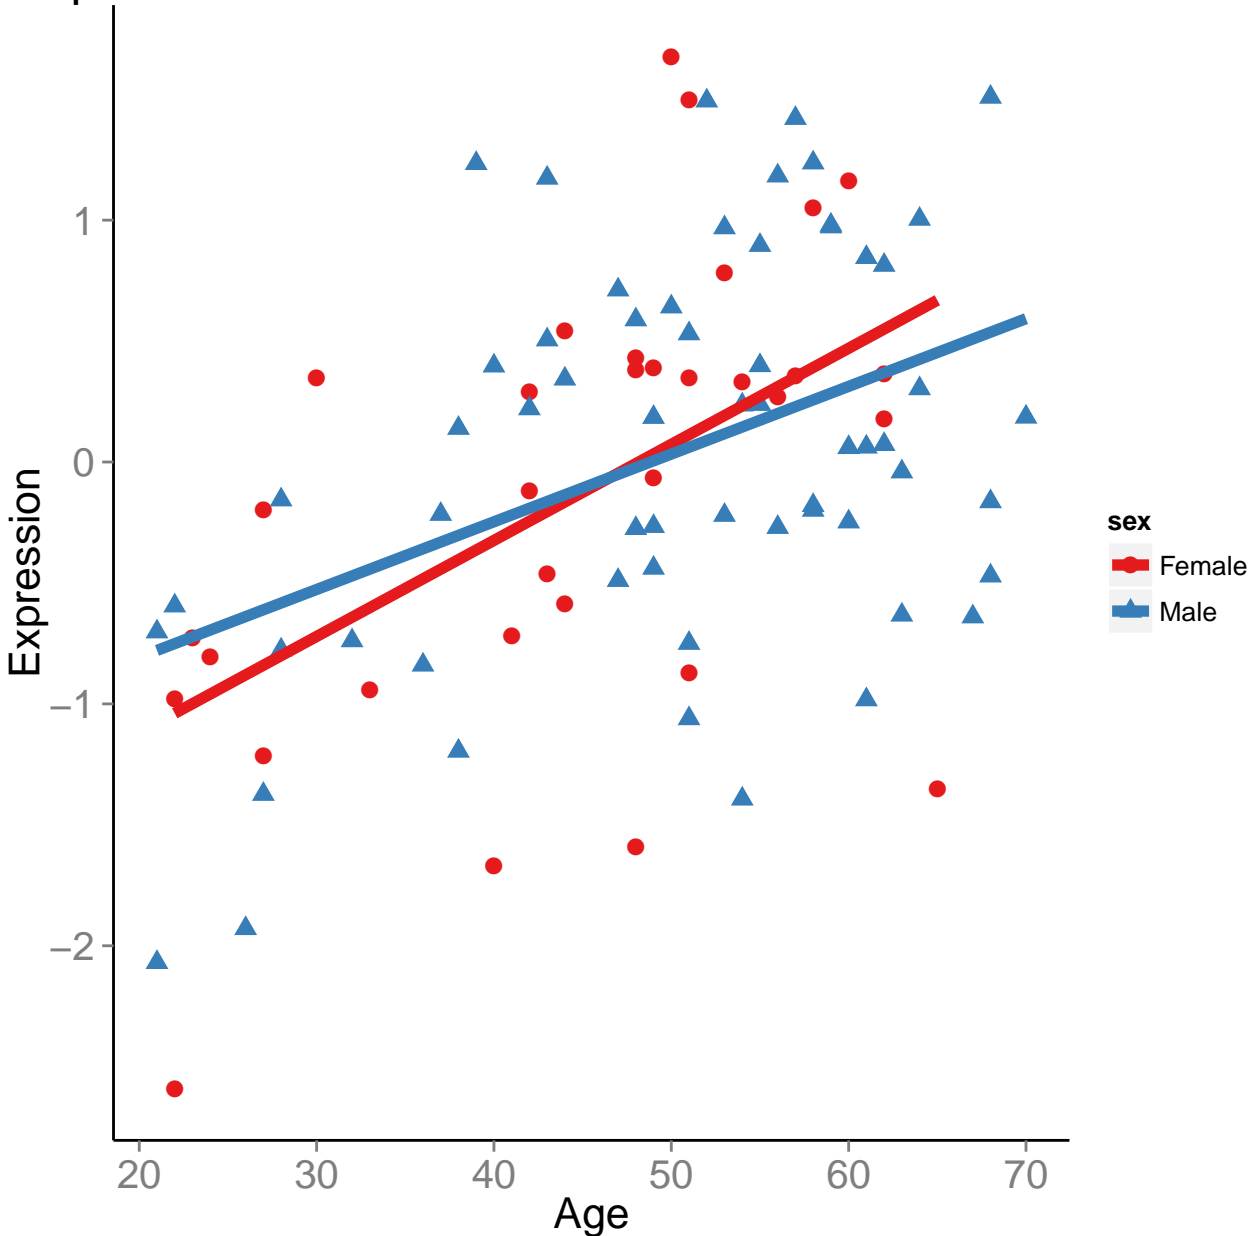

Adipose: KIAA0664 Pearson-R=-0.47 Pval=1.71E-06

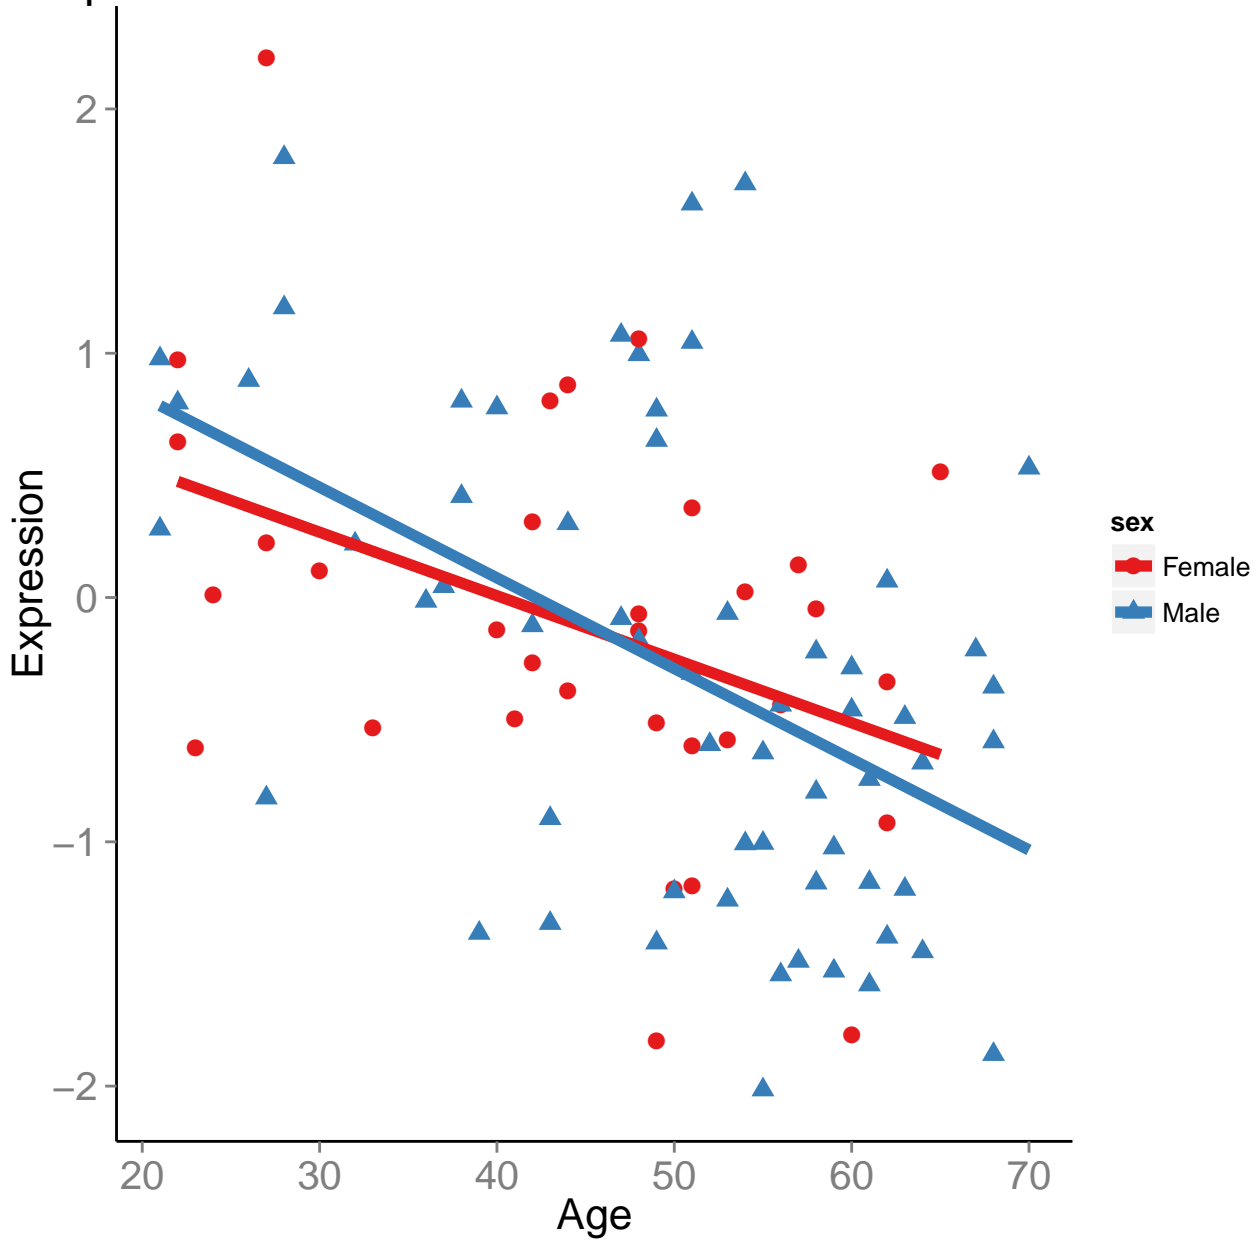

Adipose: XPC Pearson-R=0.47 Pval=2.00E-06

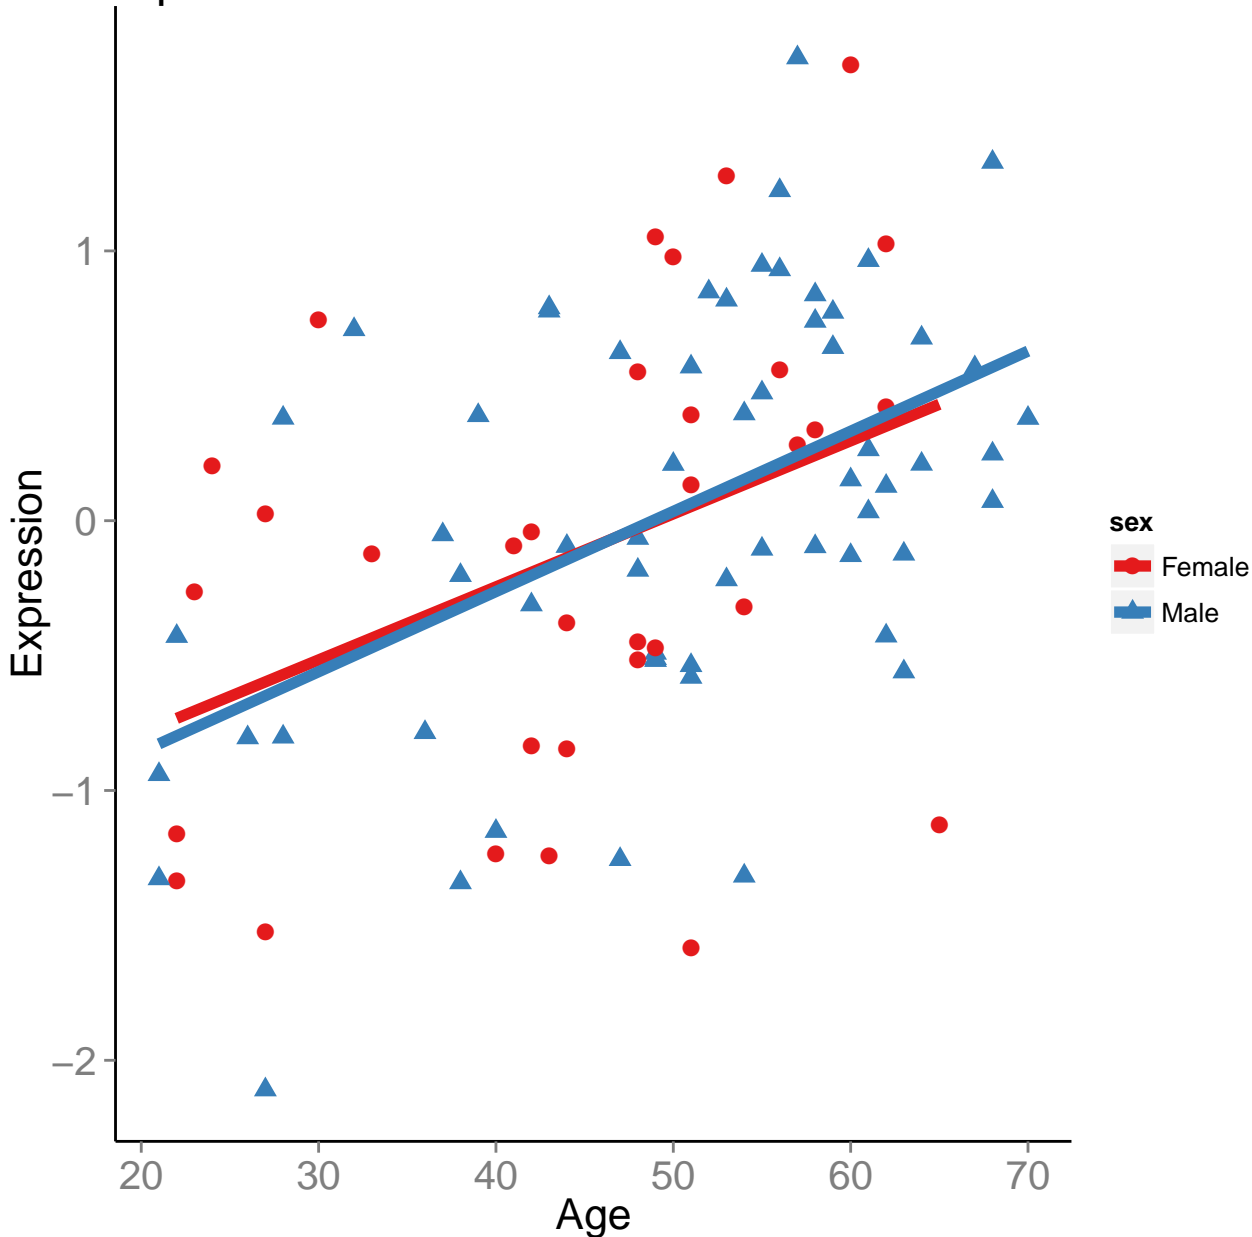

Adipose: EVC2 Pearson-R=0.47 Pval=2.21E-06

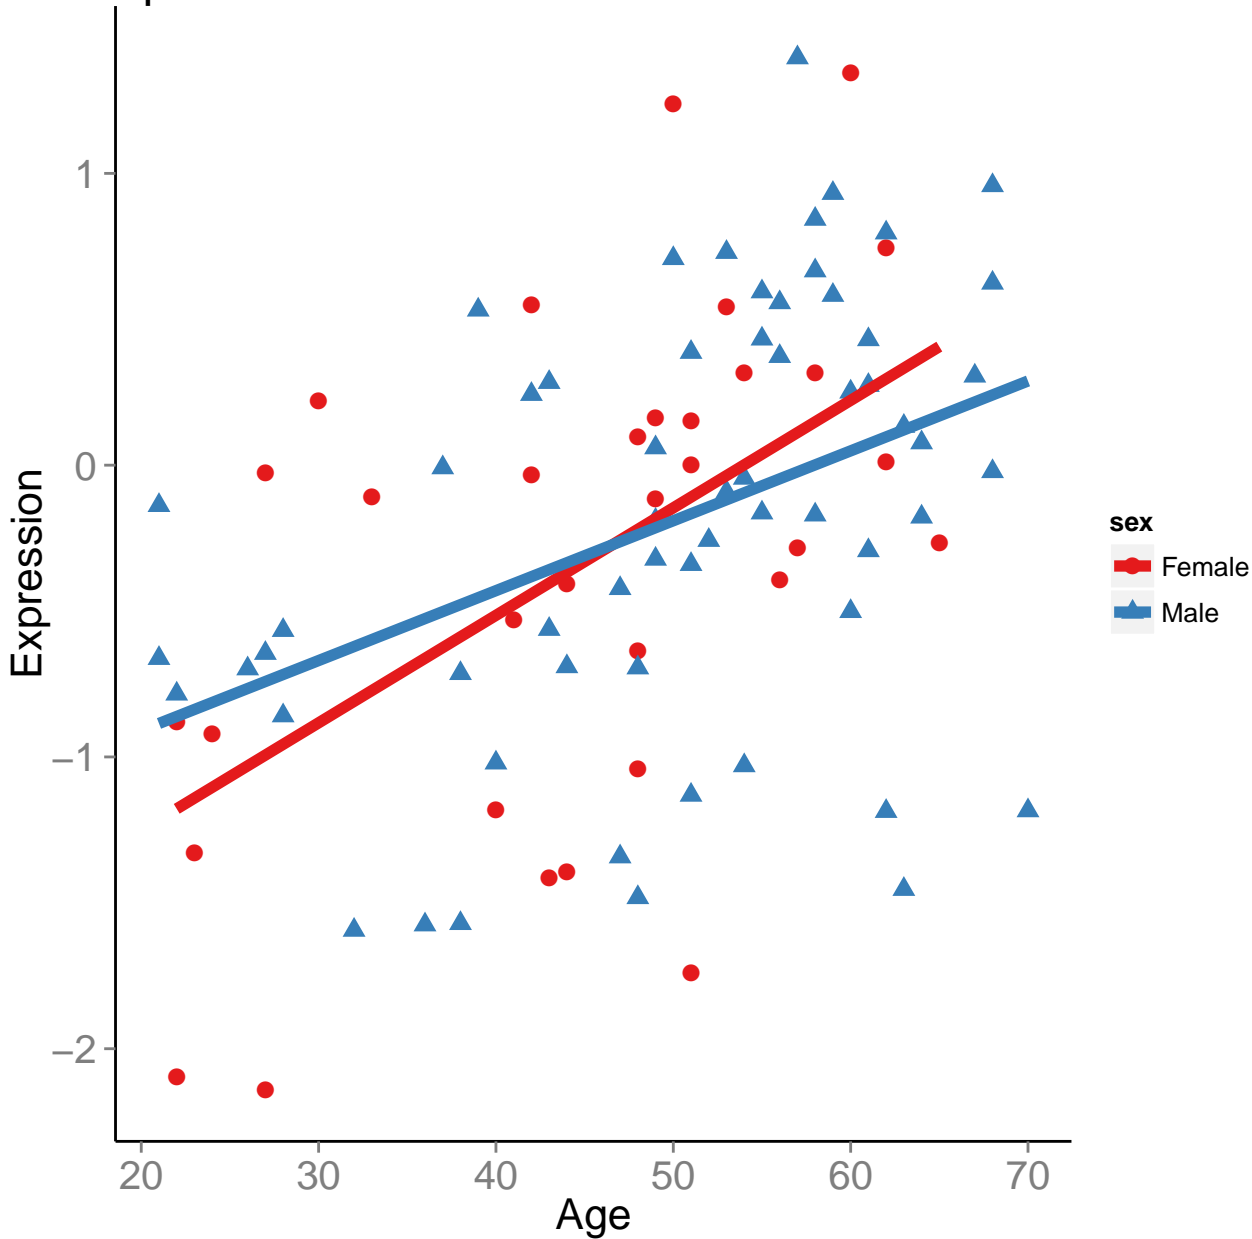



Adipose: PER1 Pearson-R=0.47 Pval=1.96E-06

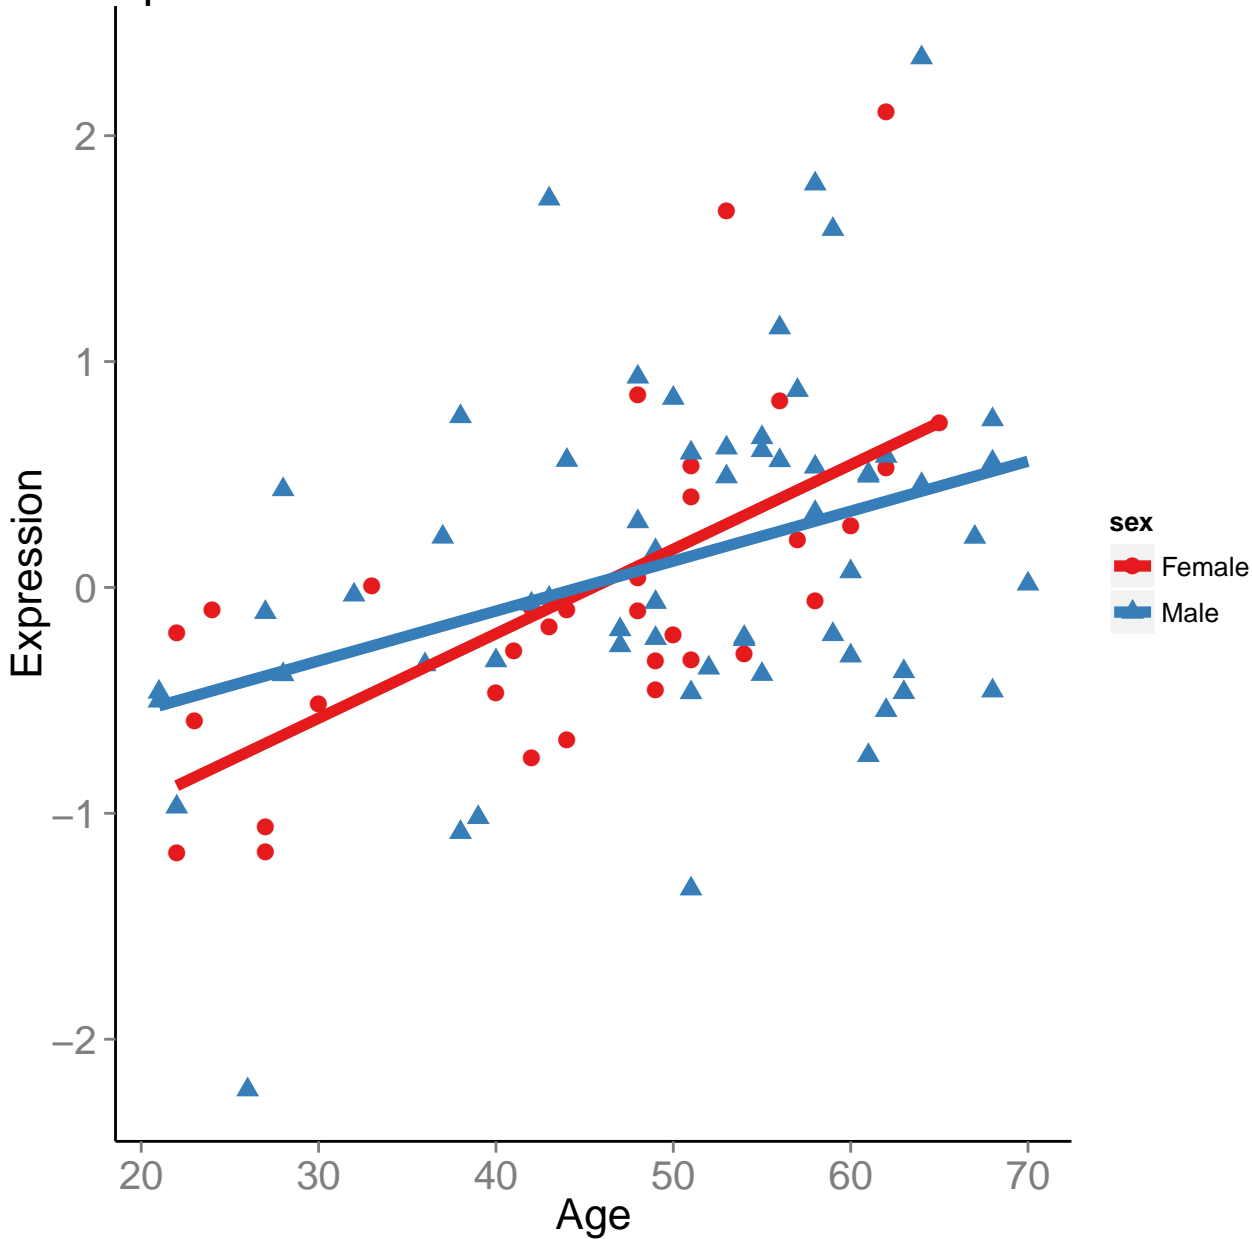

Adipose: ZNF521 Pearson-R=0.47 Pval=2.18E-06

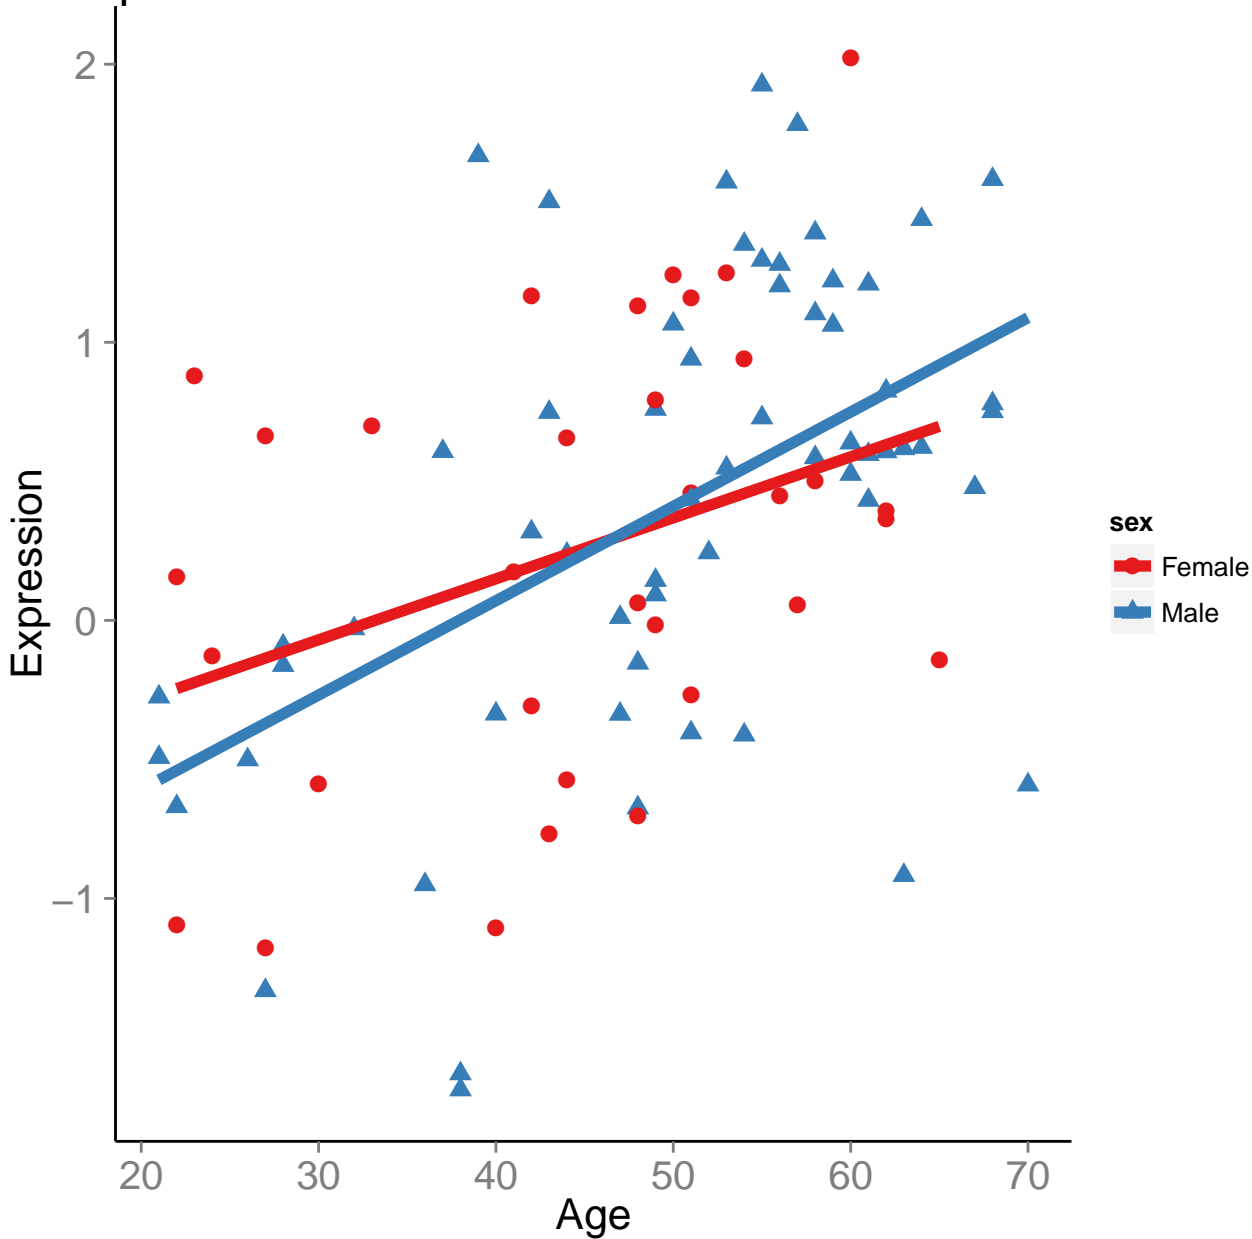

Adipose: CTSH Pearson-R=0.47 Pval=1.85E-06

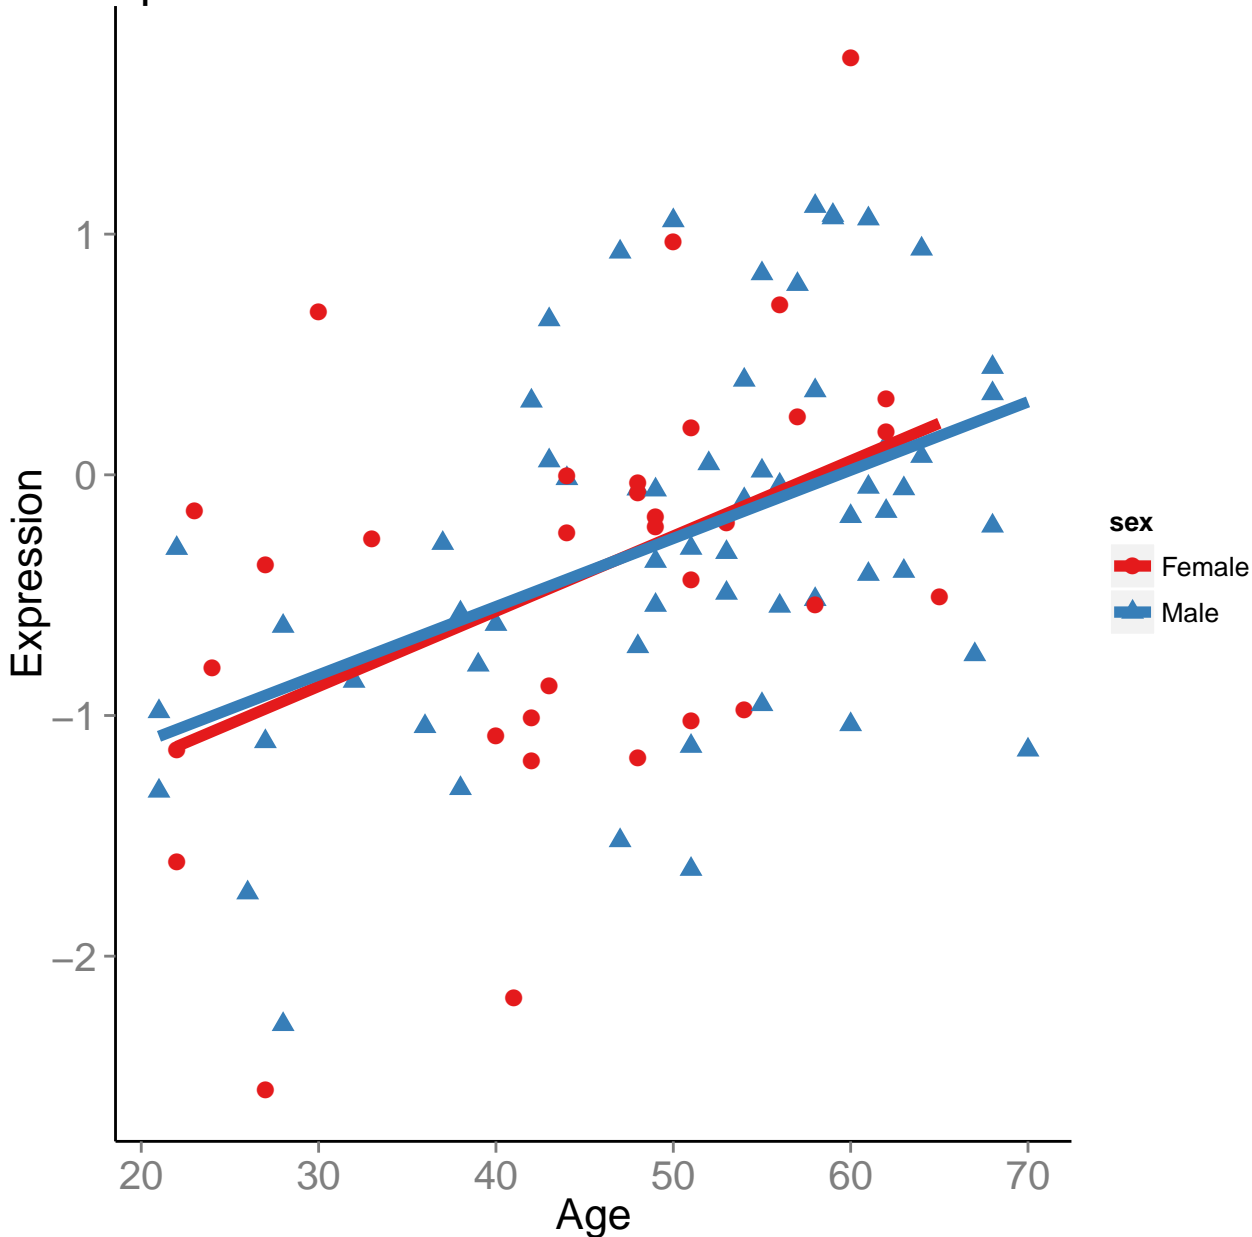

Adipose: AC135048.13 Pearson-R=0.46 Pval=2.48E-06

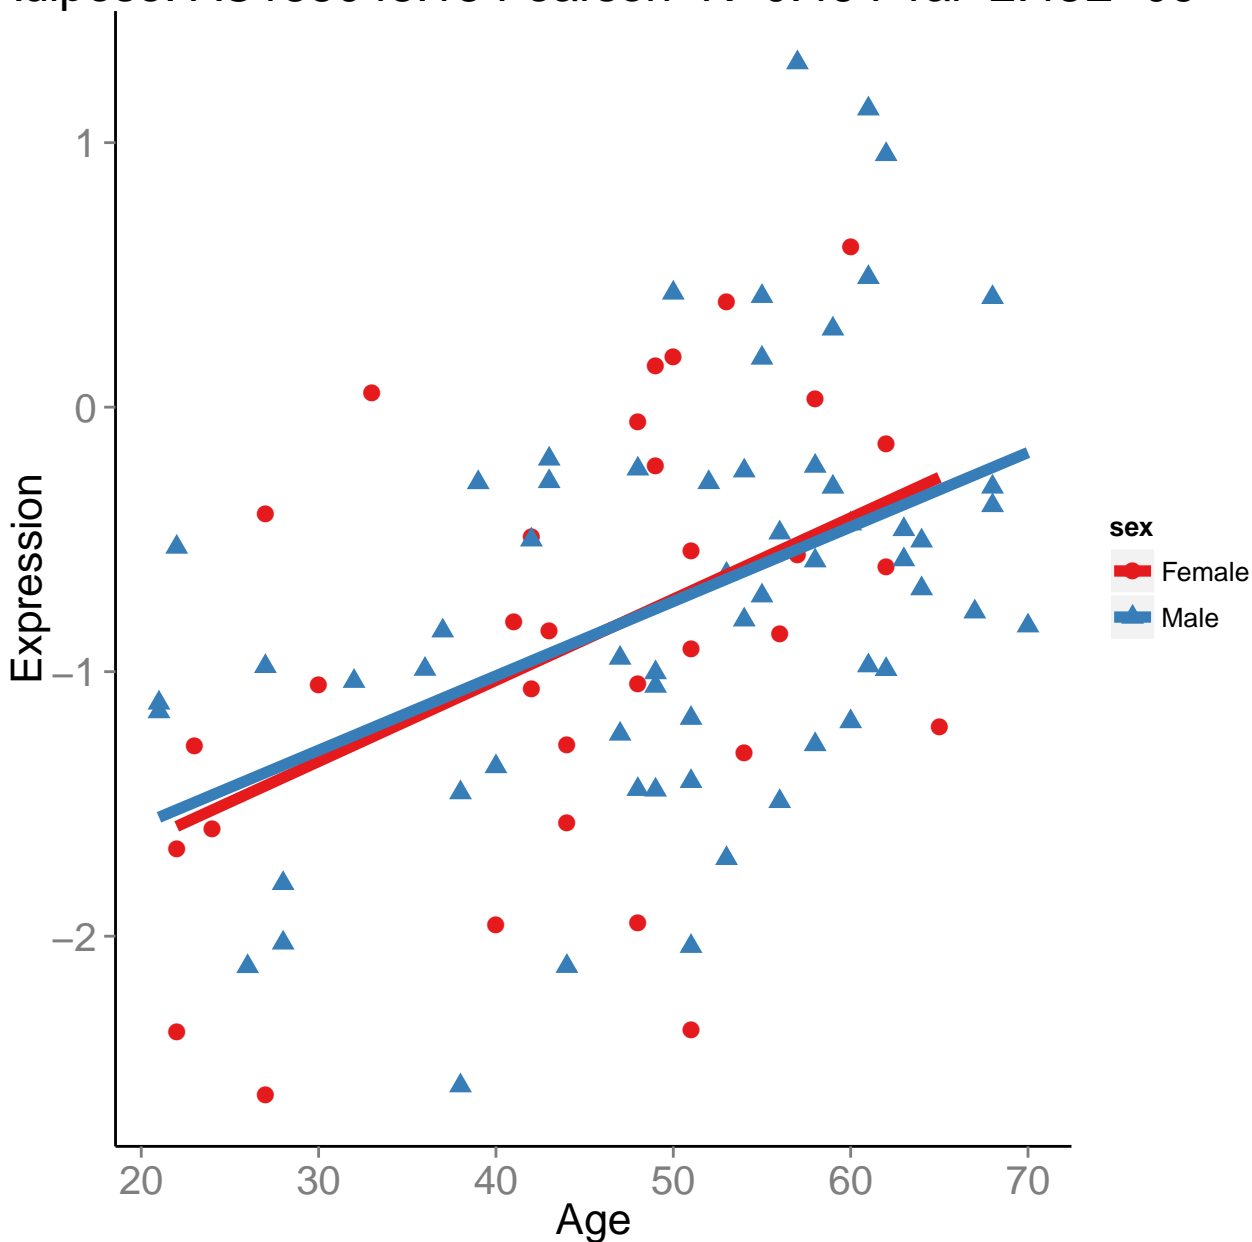

Adipose: LRRC1 Pearson-R=0.46 Pval=2.45E-06

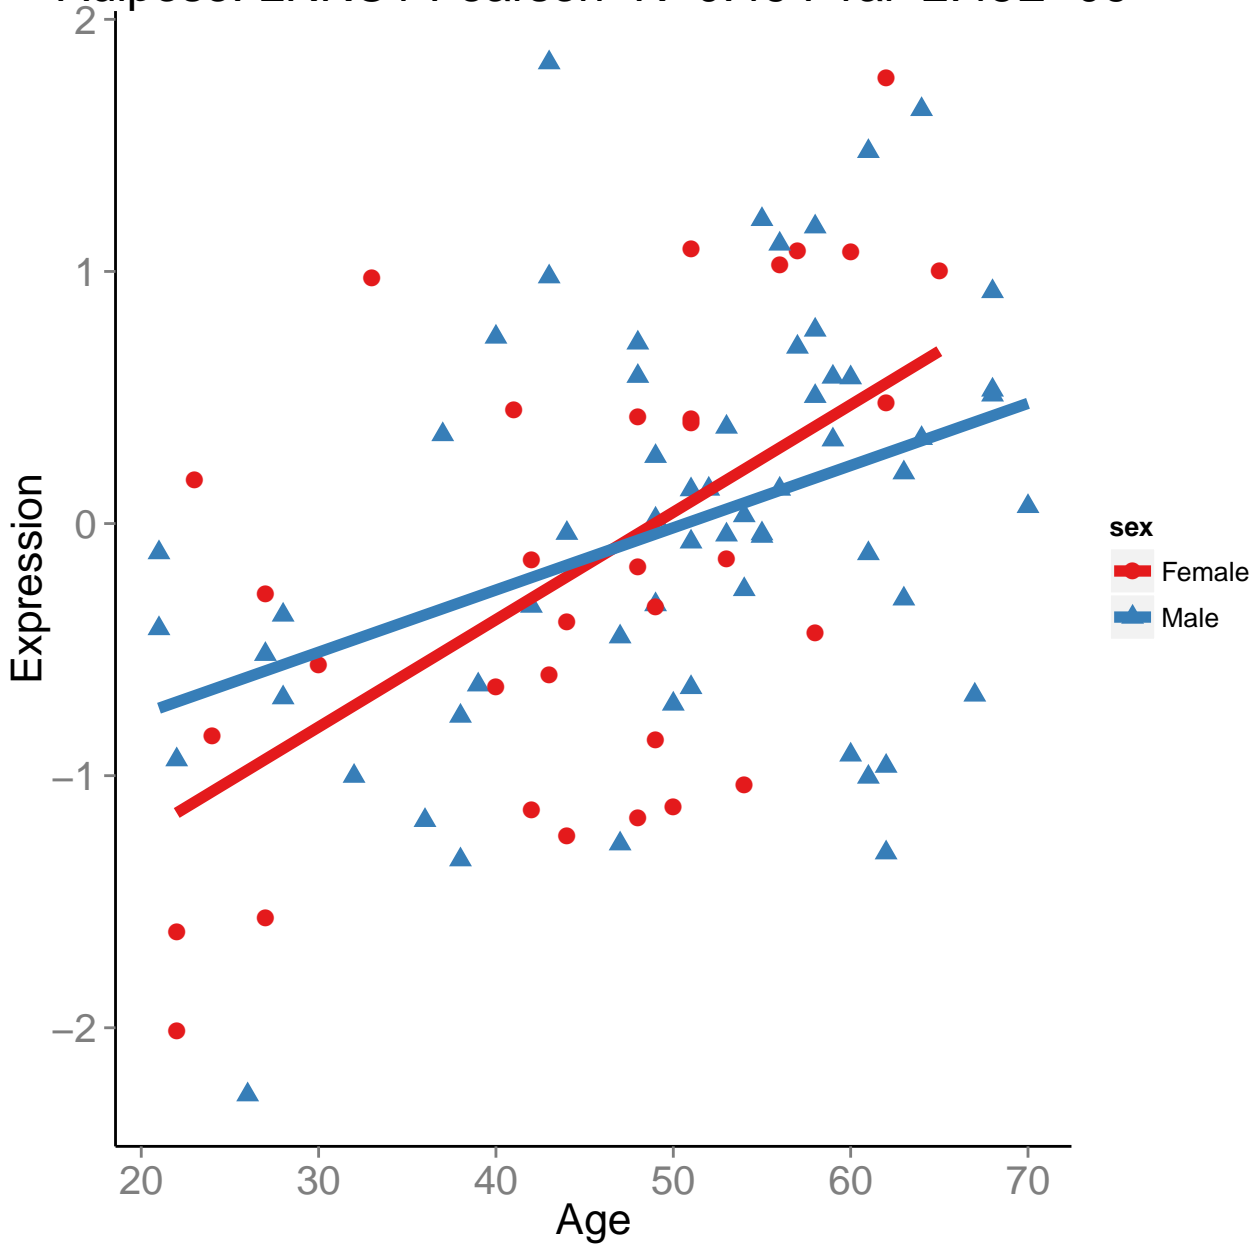

Adipose: ORAI3 Pearson-R=0.46 Pval=2.56E-06

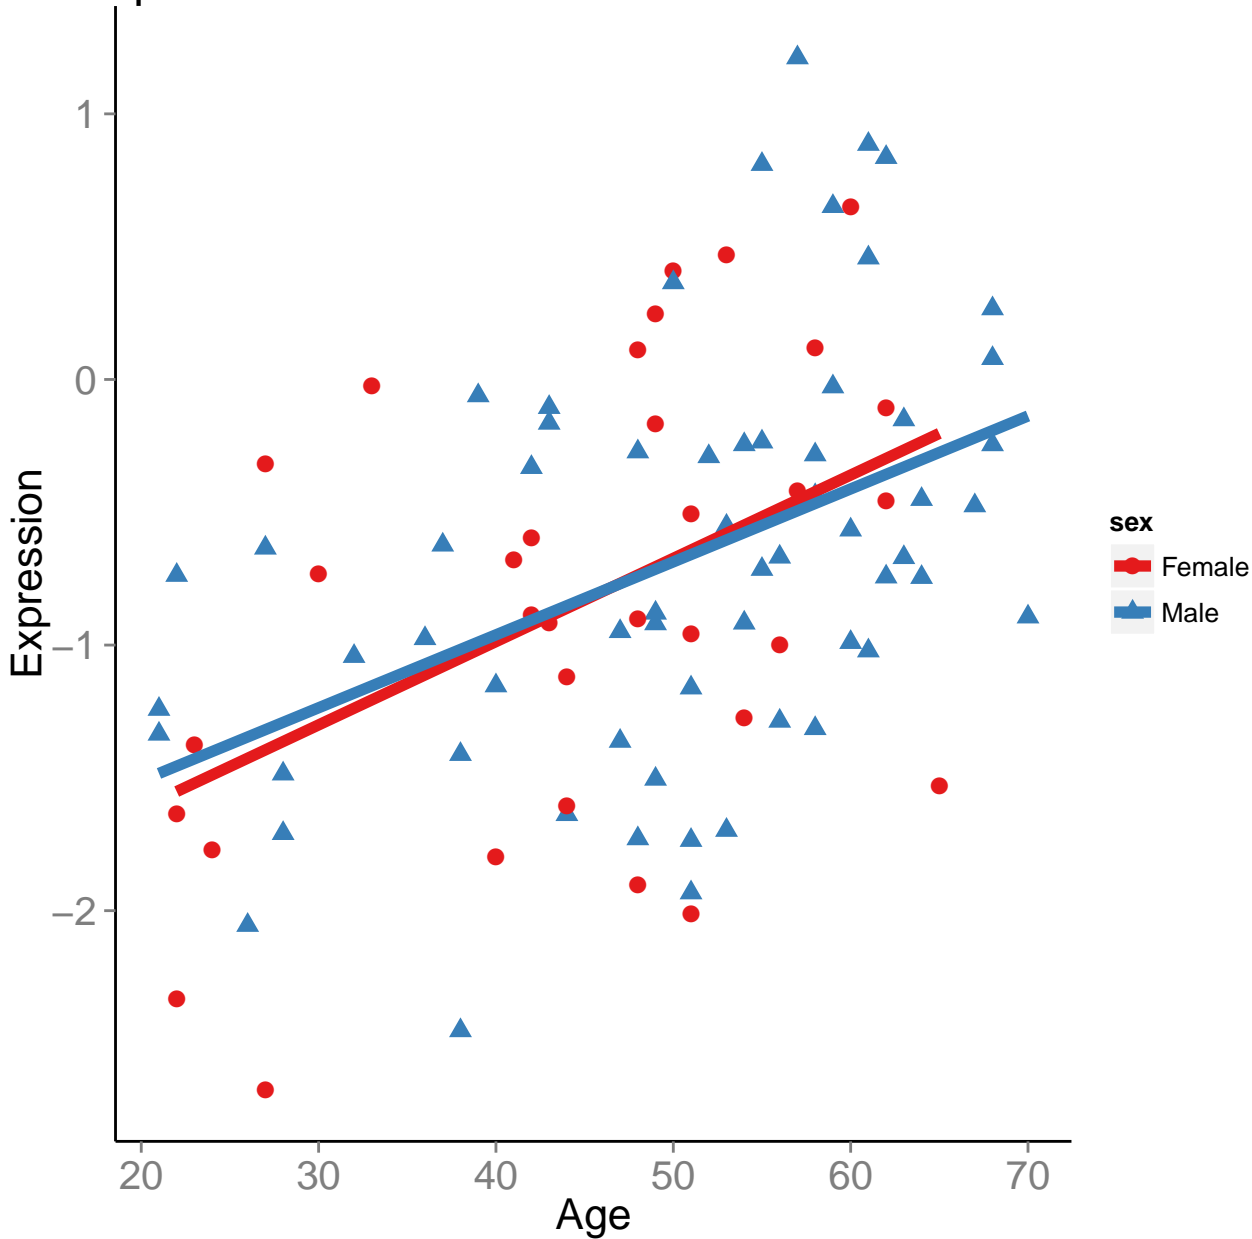

Adipose: ELMO1 Pearson-R=0.46 Pval=2.51E-06

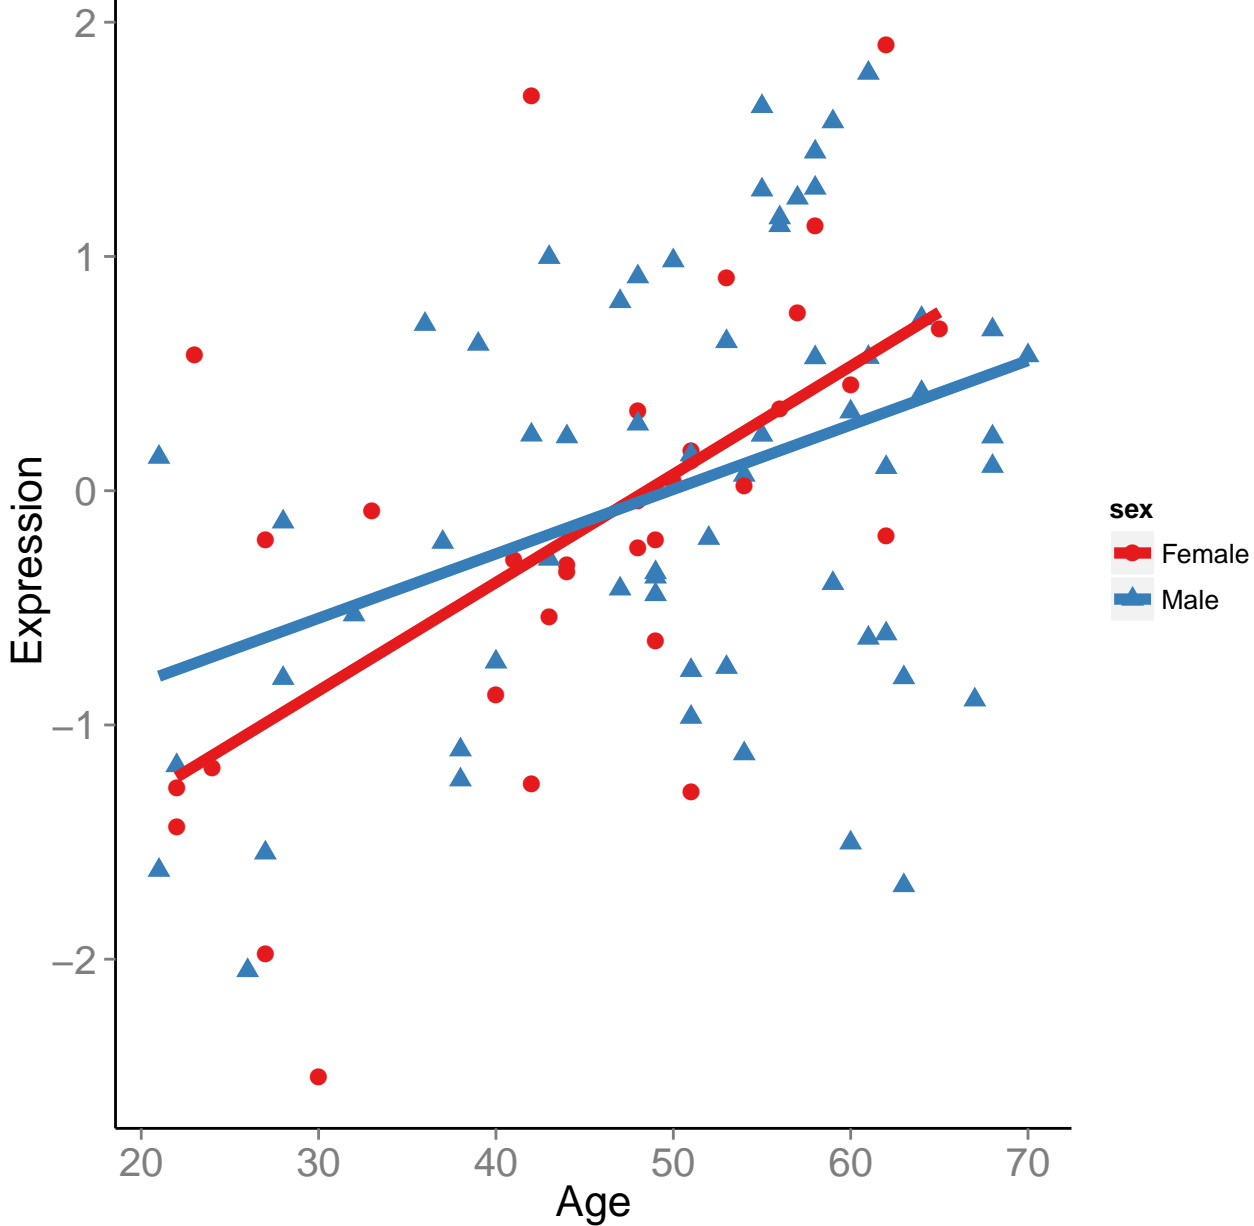

Adipose: YWHAE Pearson-R=-0.46 Pval=2.37E-06

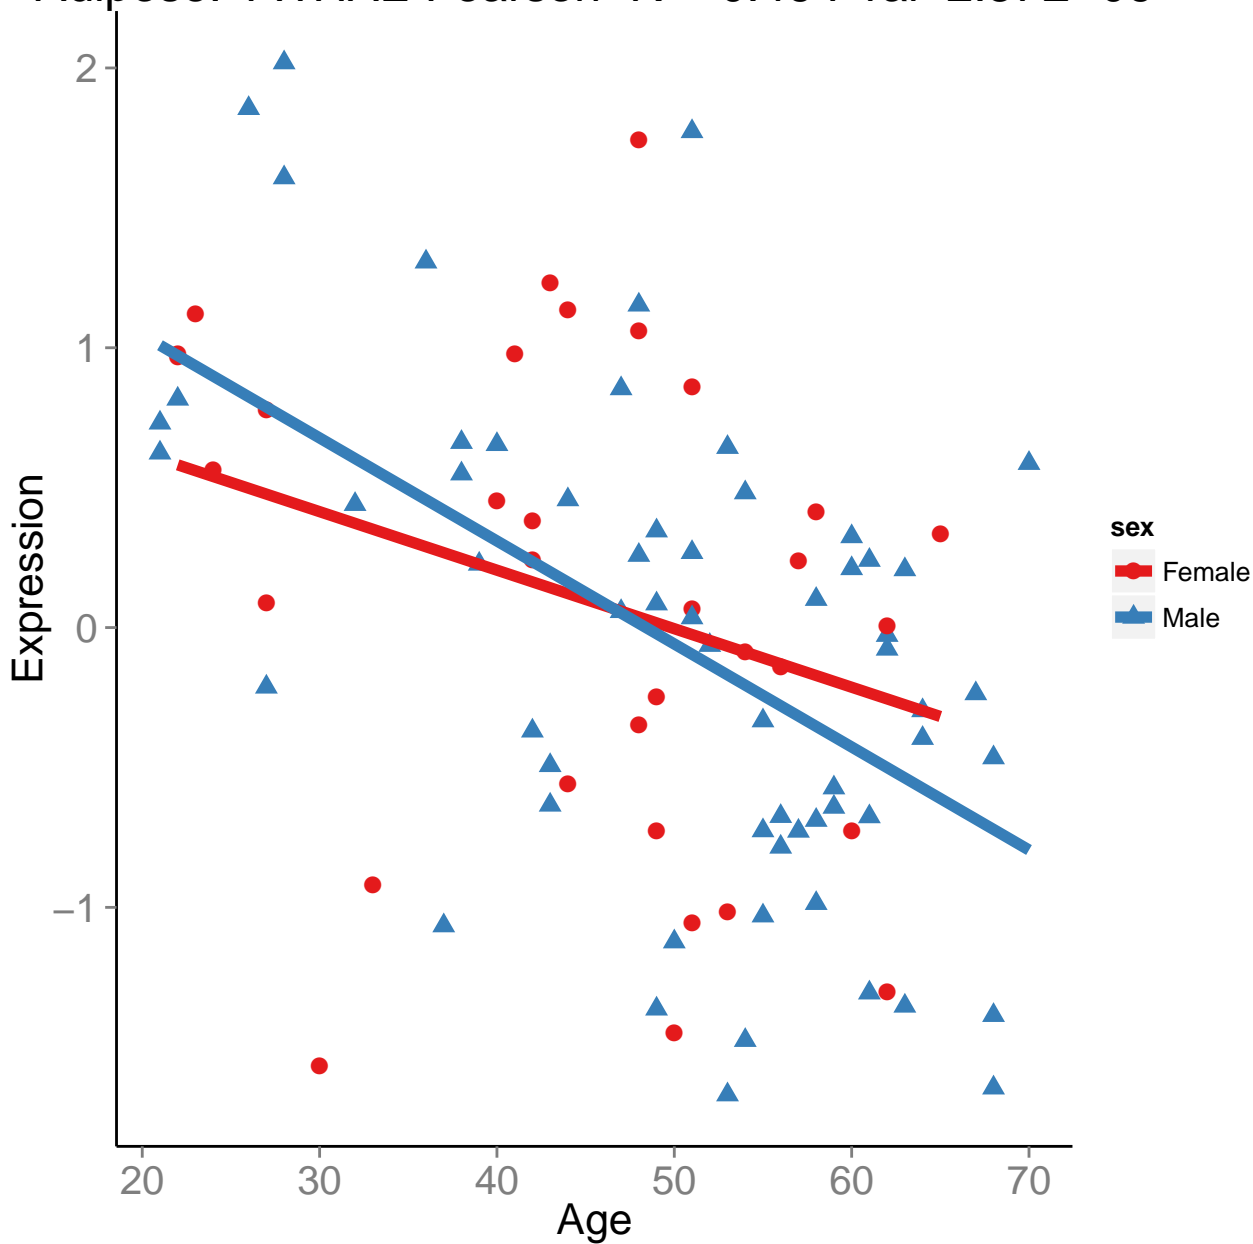



Adipose: GPR126 Pearson-R=0.47 Pval=2.10E-06

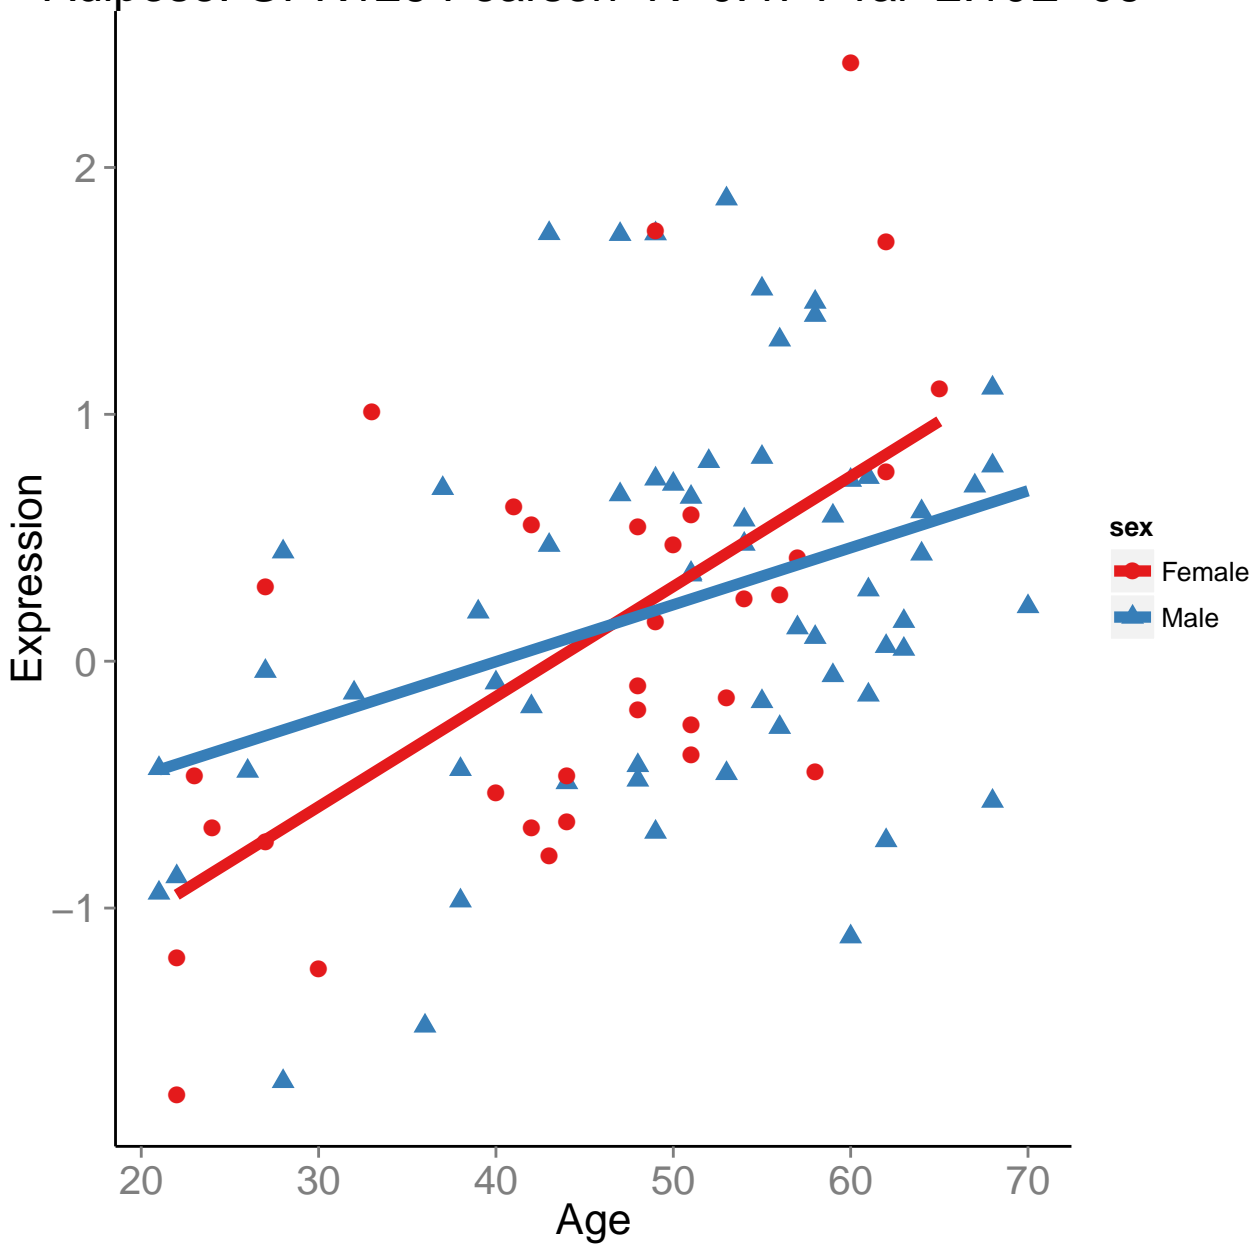

Adipose: BSG Pearson-R=-0.46 Pval=2.46E-06

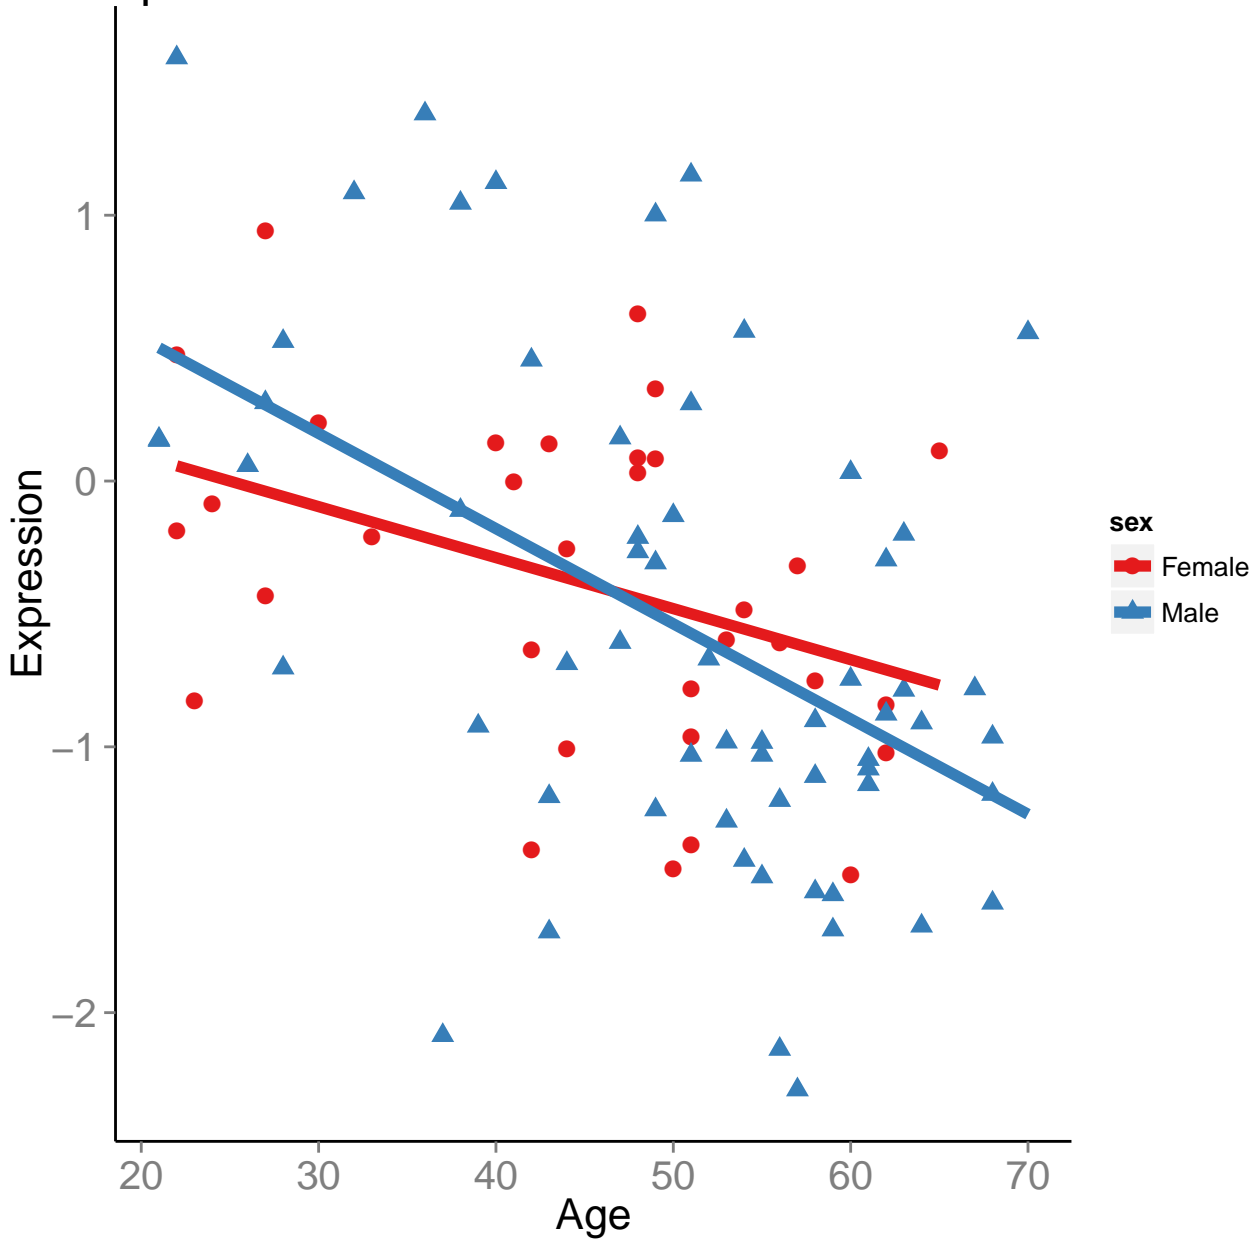

Adipose: ALDH1A1 Pearson-R=0.46 Pval=2.47E-06

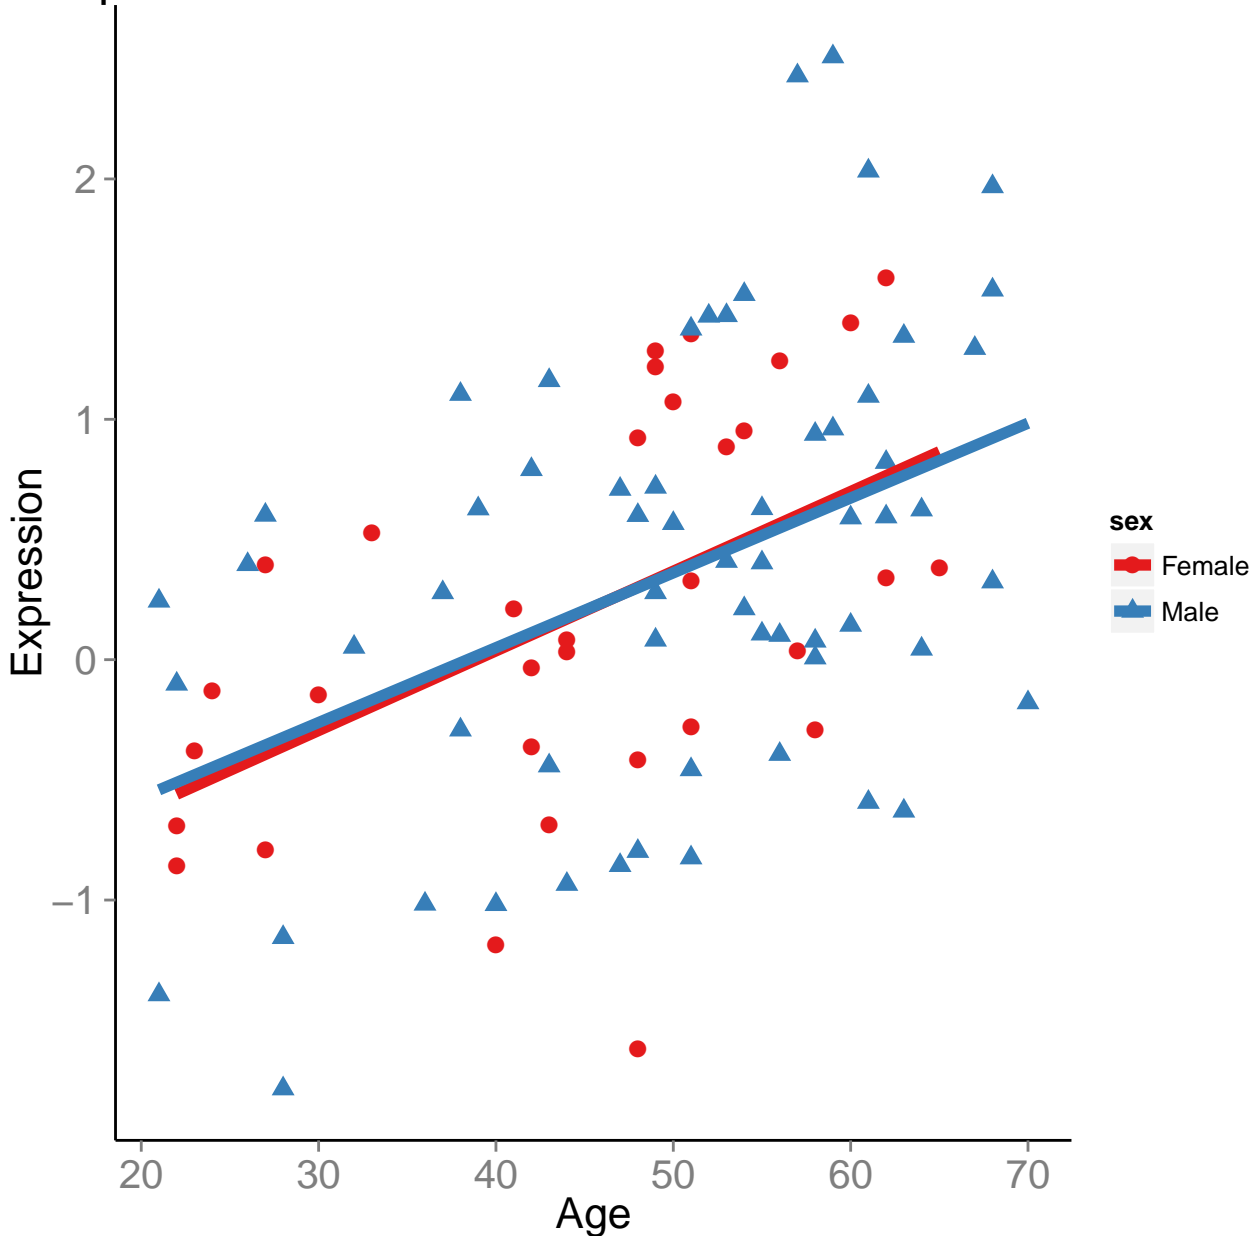

Adipose: PPP1R15A Pearson-R=0.47 Pval=1.88E-06

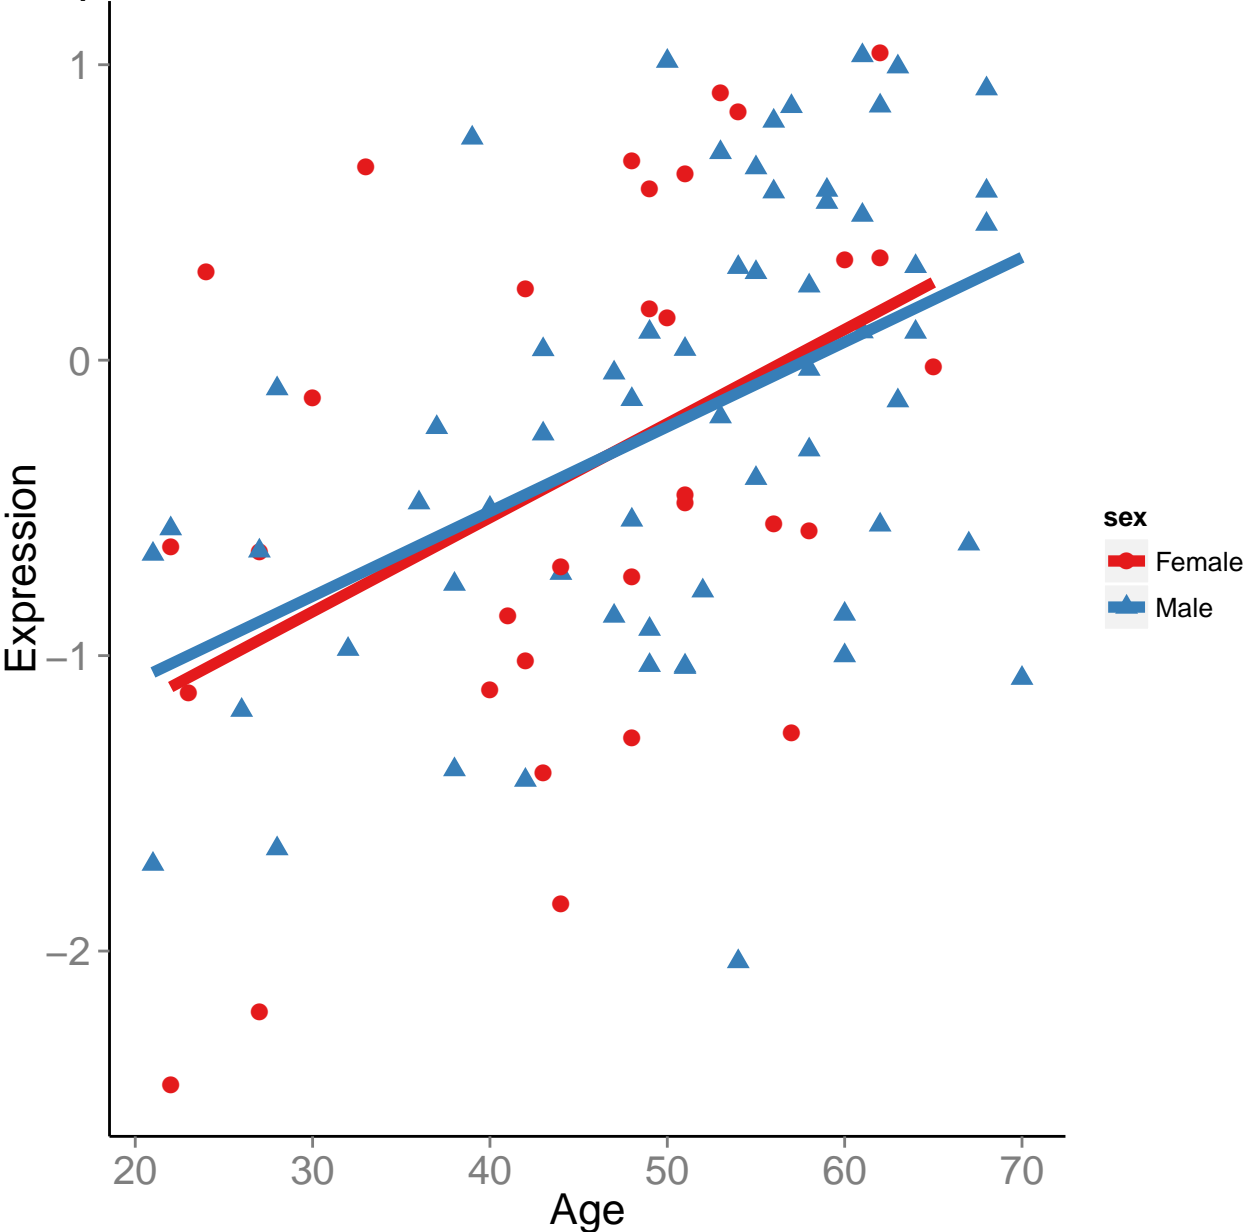

Adipose: ETFA Pearson-R=-0.47 Pval=1.94E-06

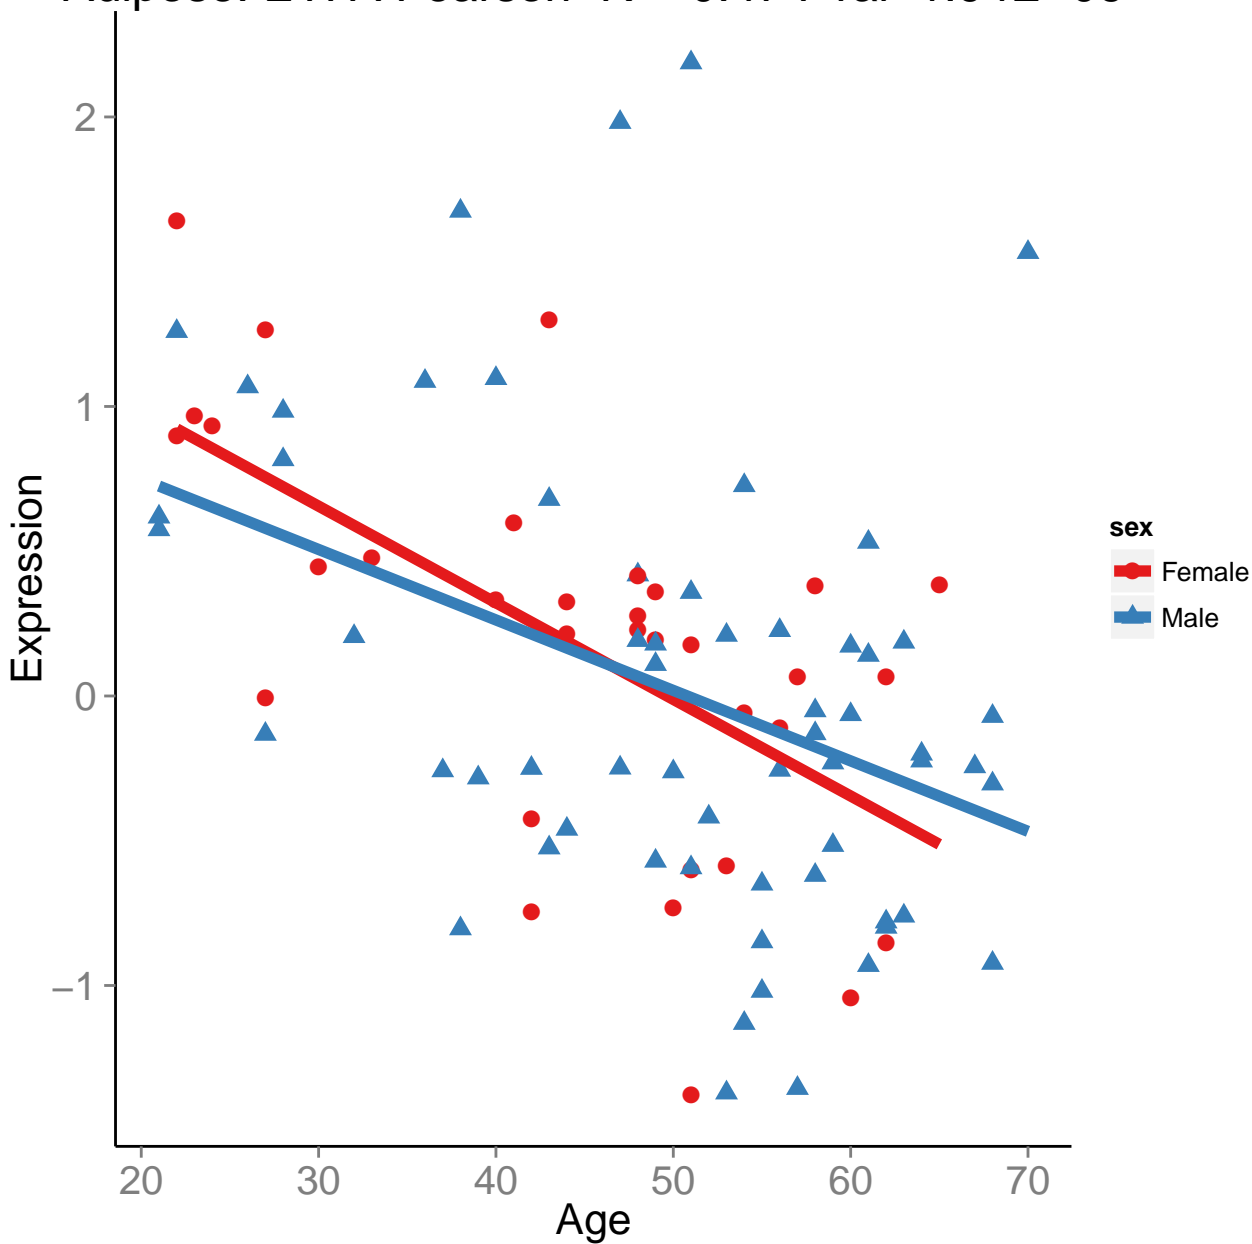

Adipose: ABHD5 Pearson-R=-0.46 Pval=2.36E-06

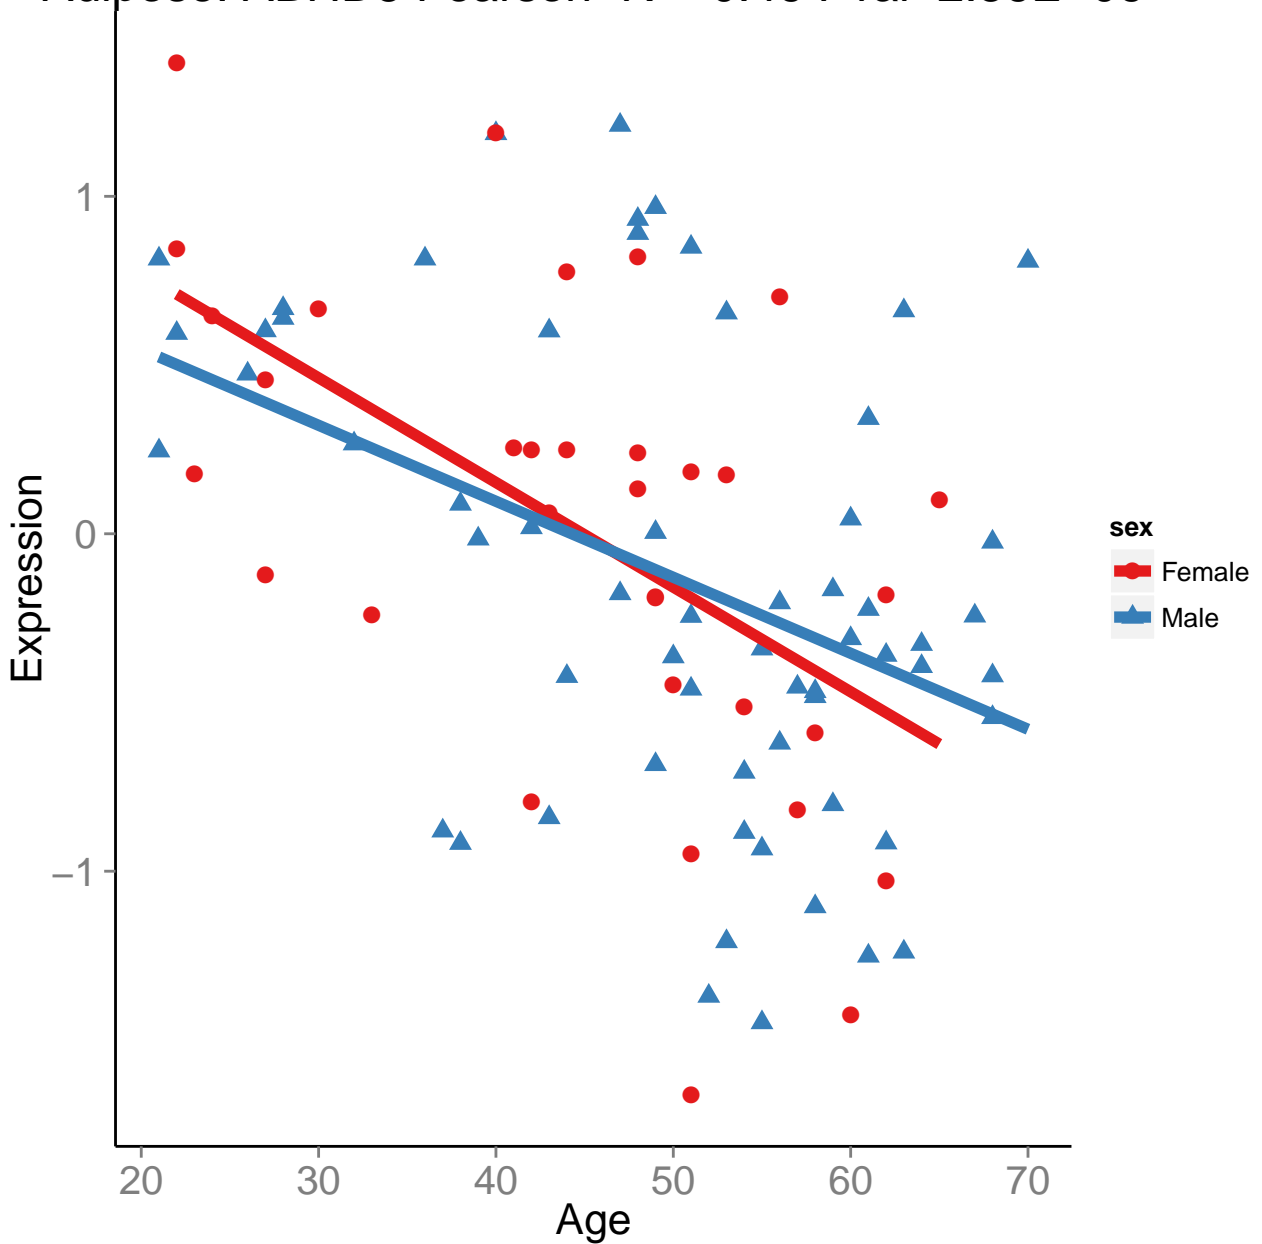

Adipose: LUM Pearson-R=0.47 Pval=2.16E-06

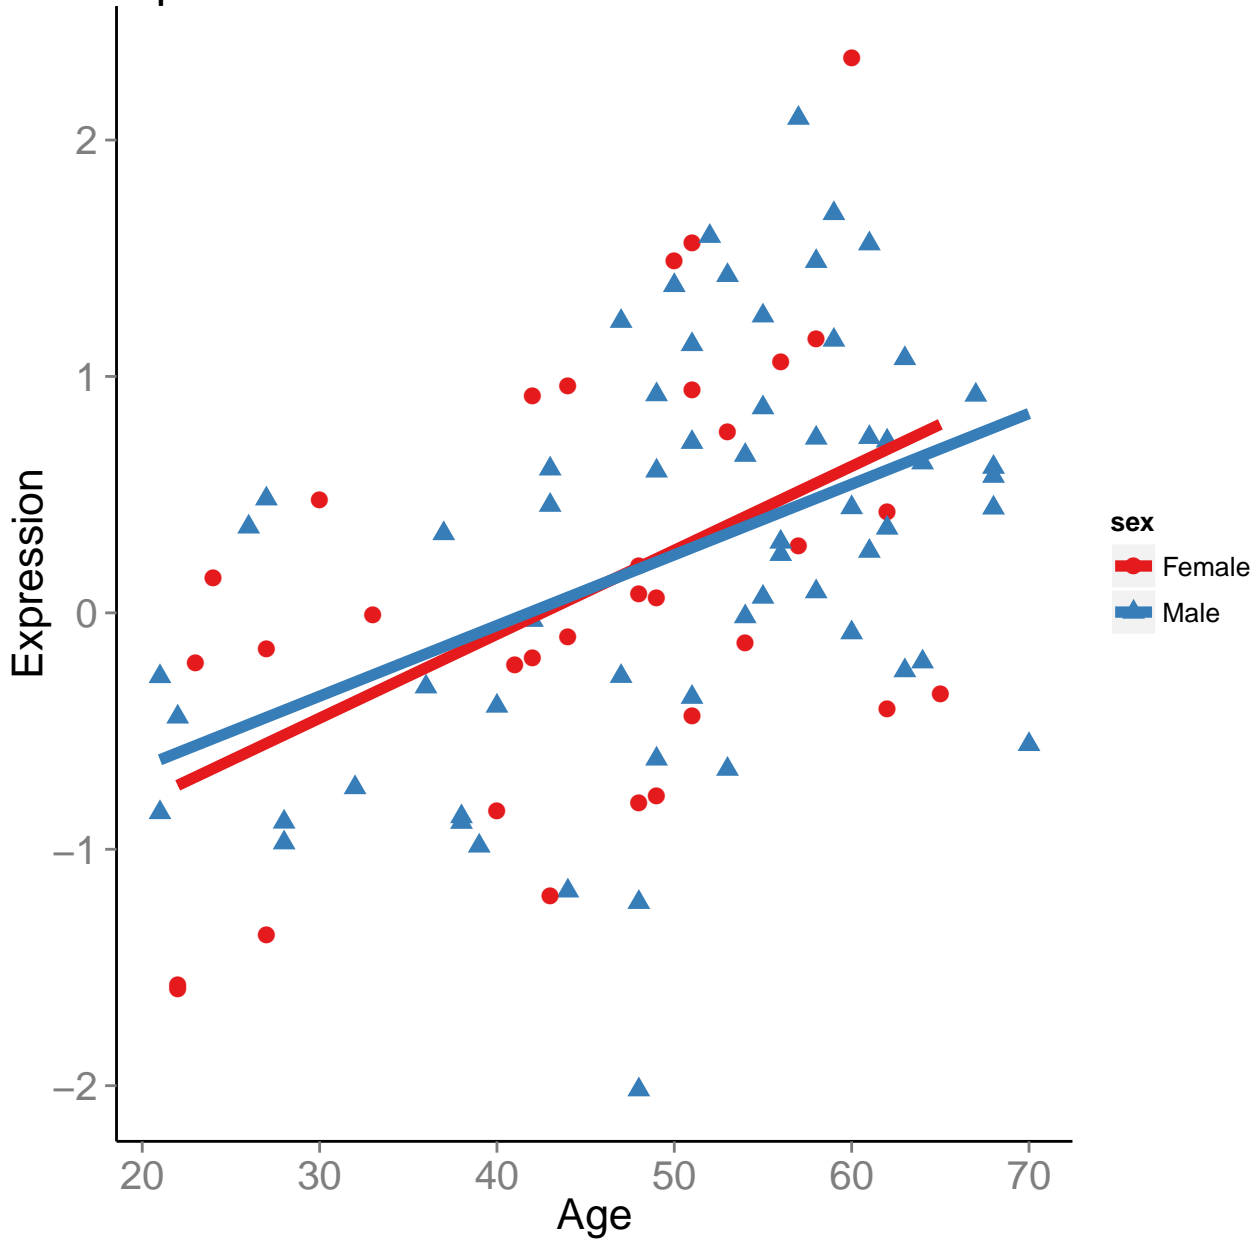

Adipose: PEX19 Pearson-R=-0.47 Pval=1.89E-06

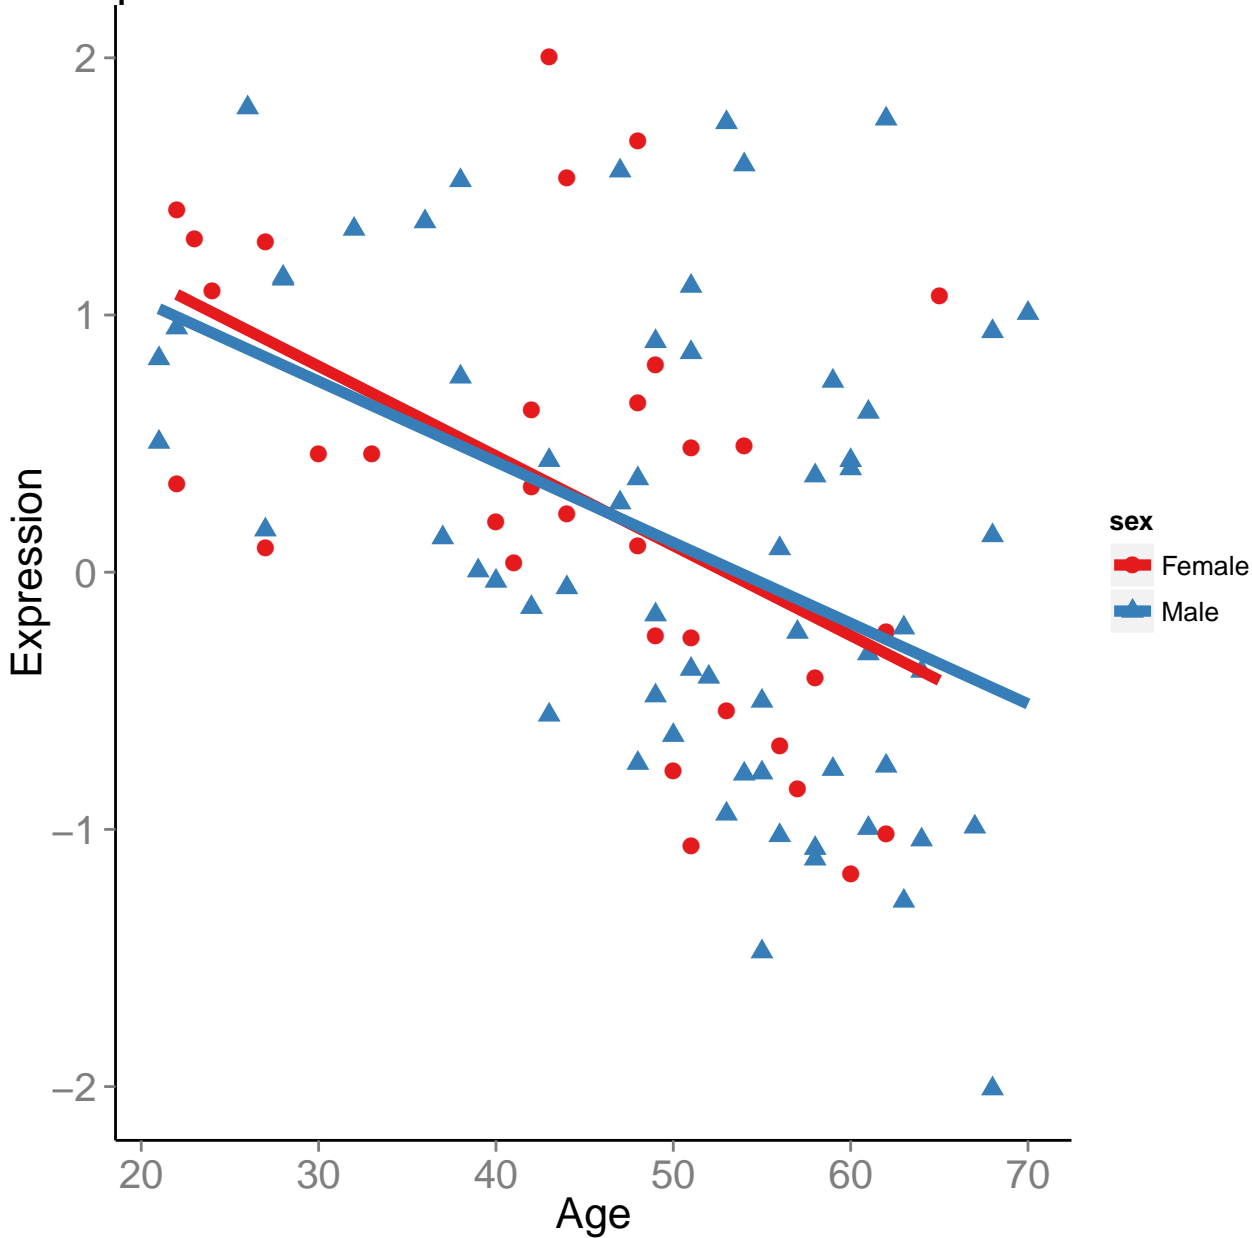



Adipose: ADAMTS12 Pearson-R=-0.46 Pval=2.40E-06

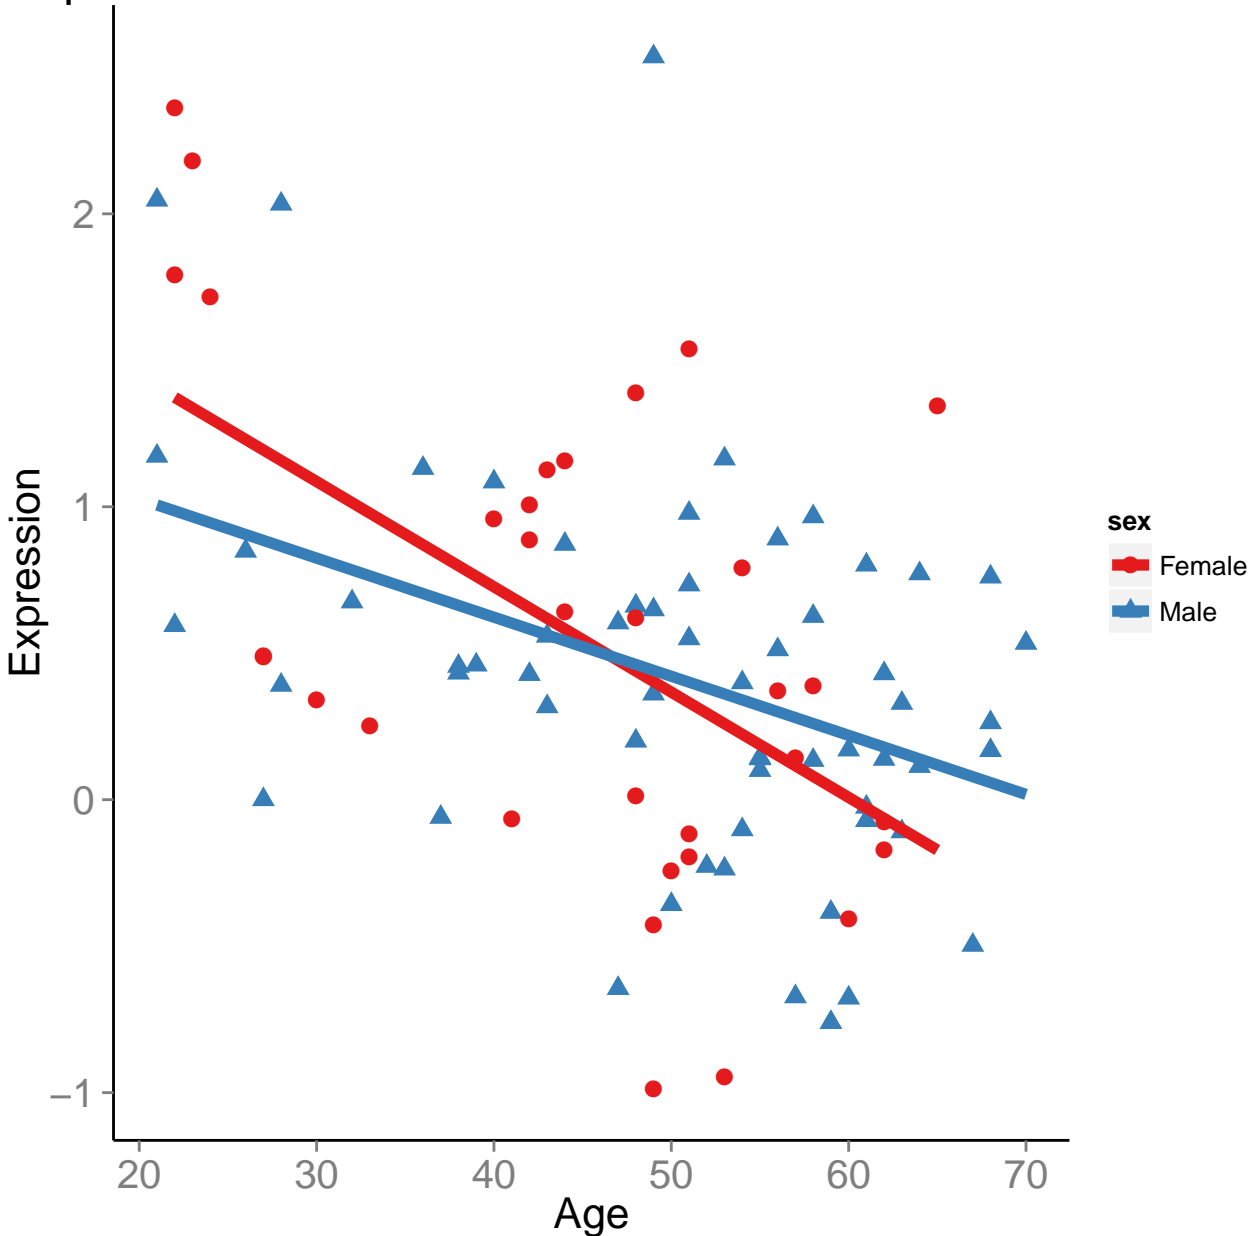

Adipose: SHFM1 Pearson-R=-0.47 Pval=2.30E-06

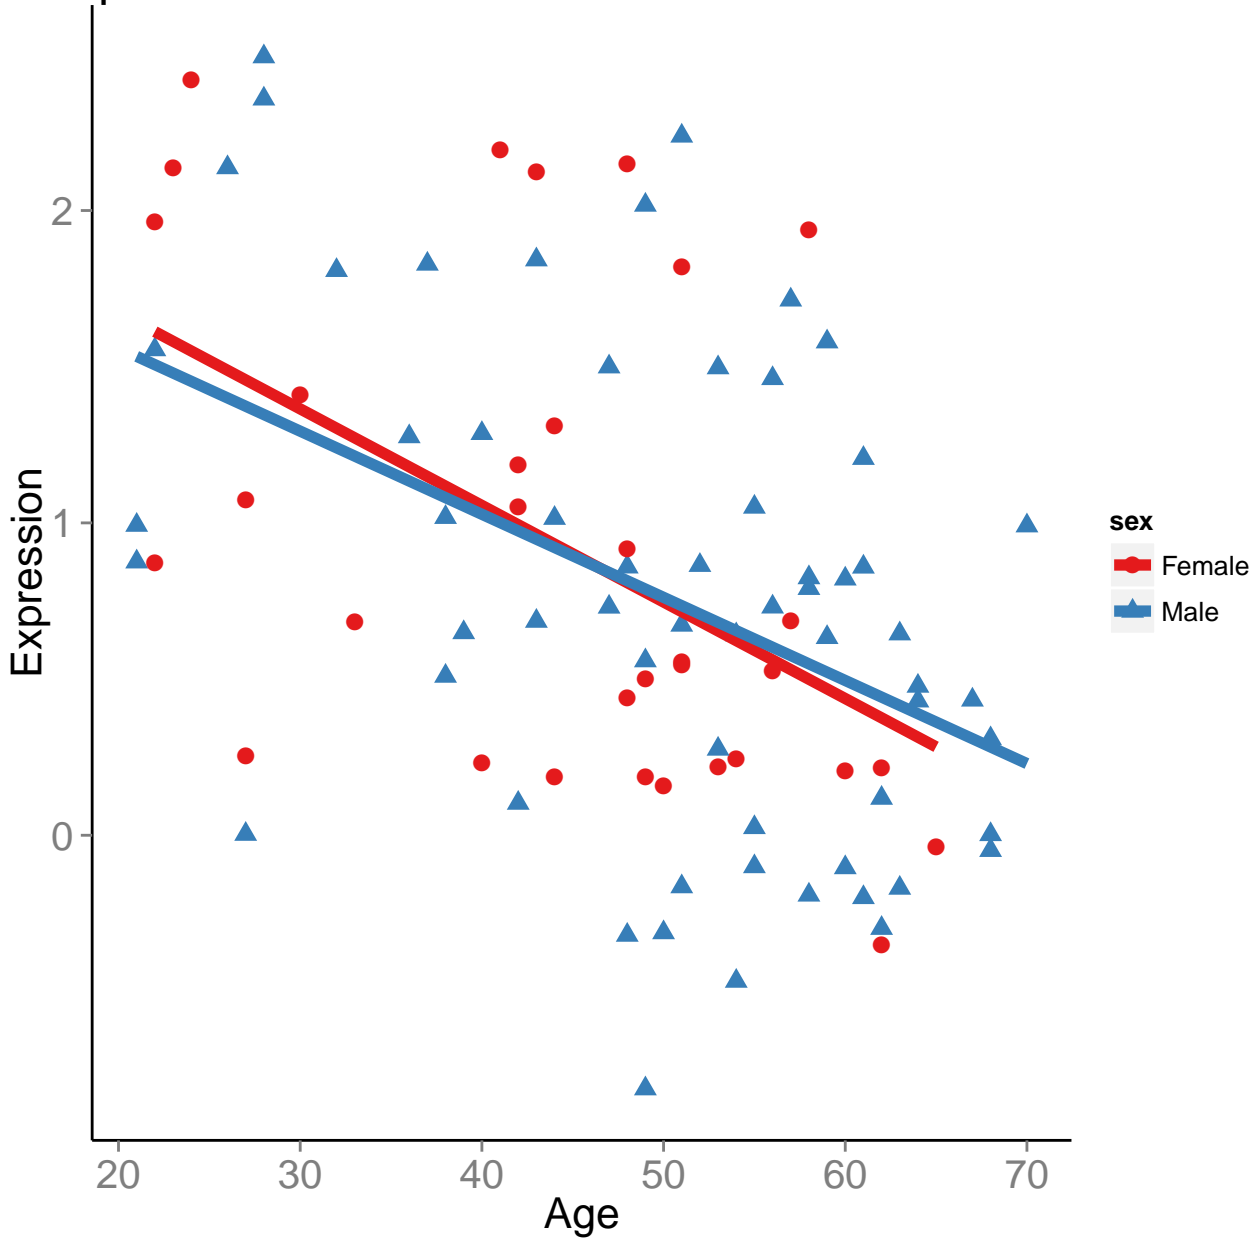

Adipose: ABCD1 Pearson-R=-0.47 Pval=2.34E-06

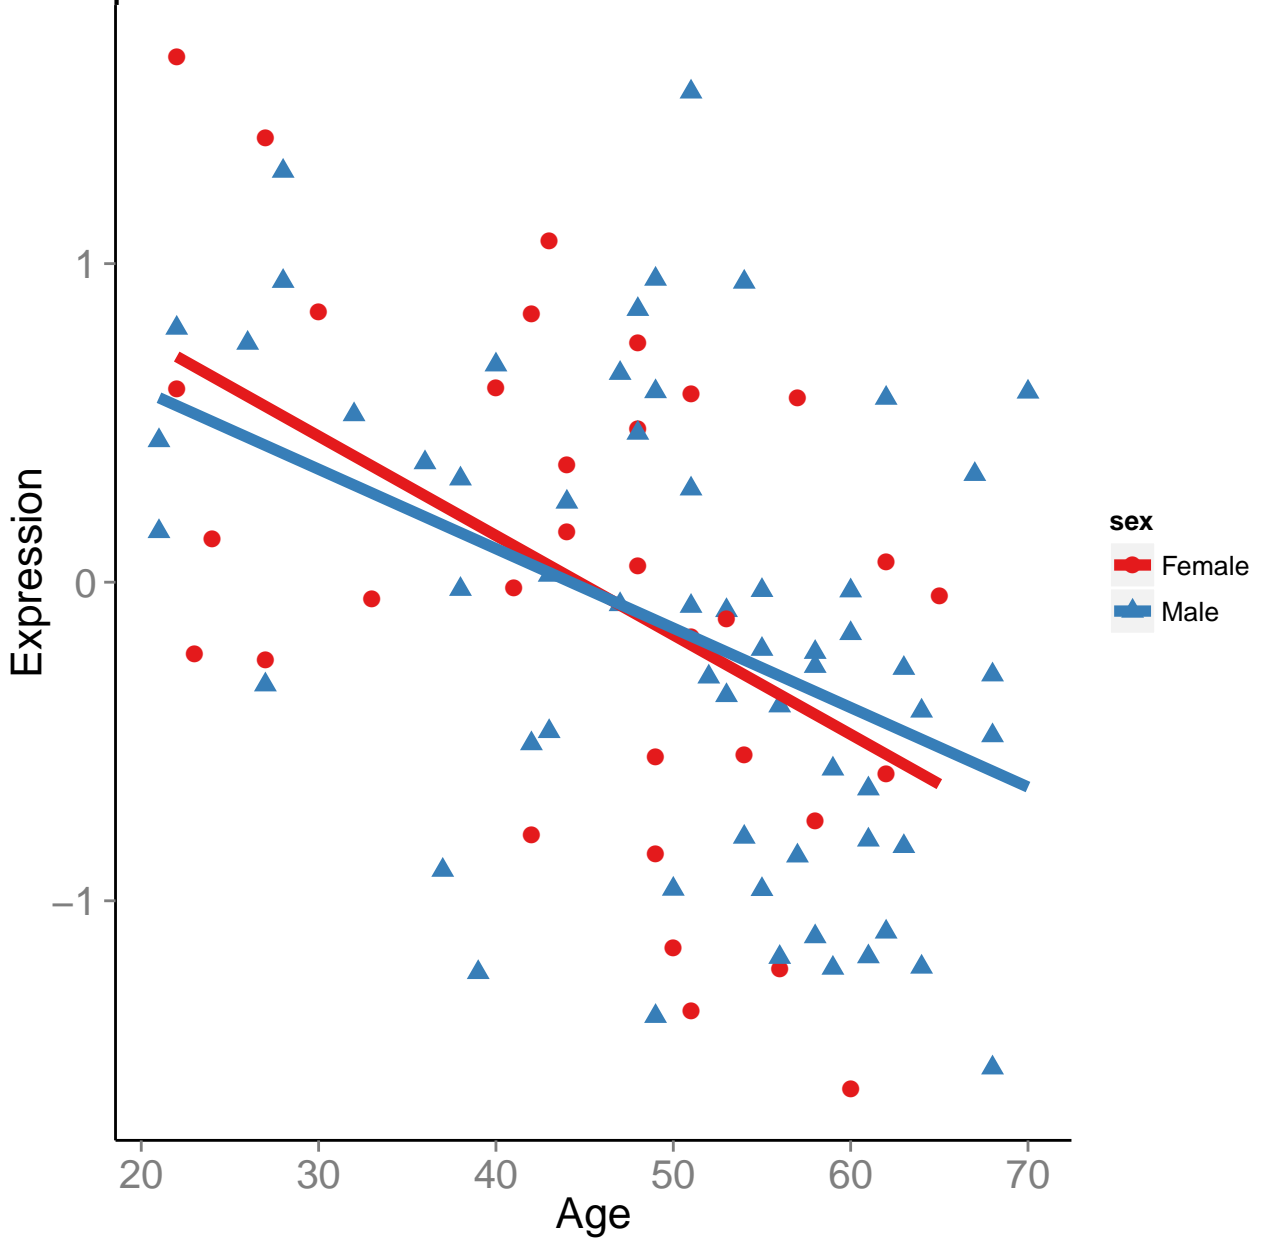

Adipose: CRLS1 Pearson-R=-0.47 Pval=2.08E-06

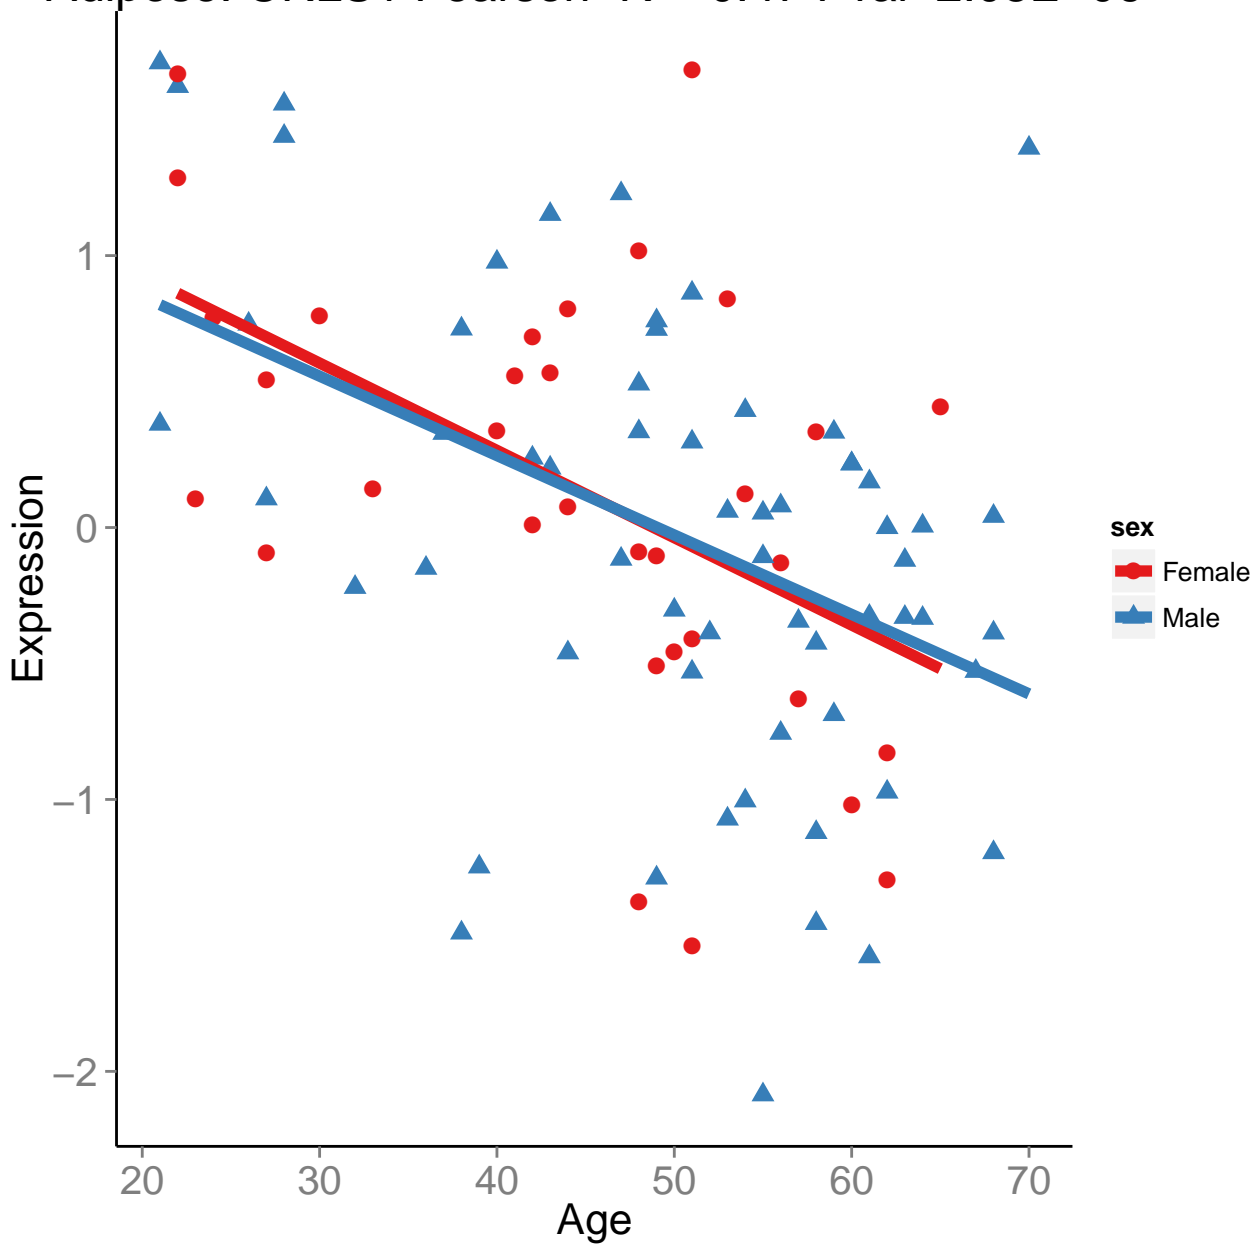

Adipose: SLIRP Pearson-R=-0.47 Pval=2.12E-06

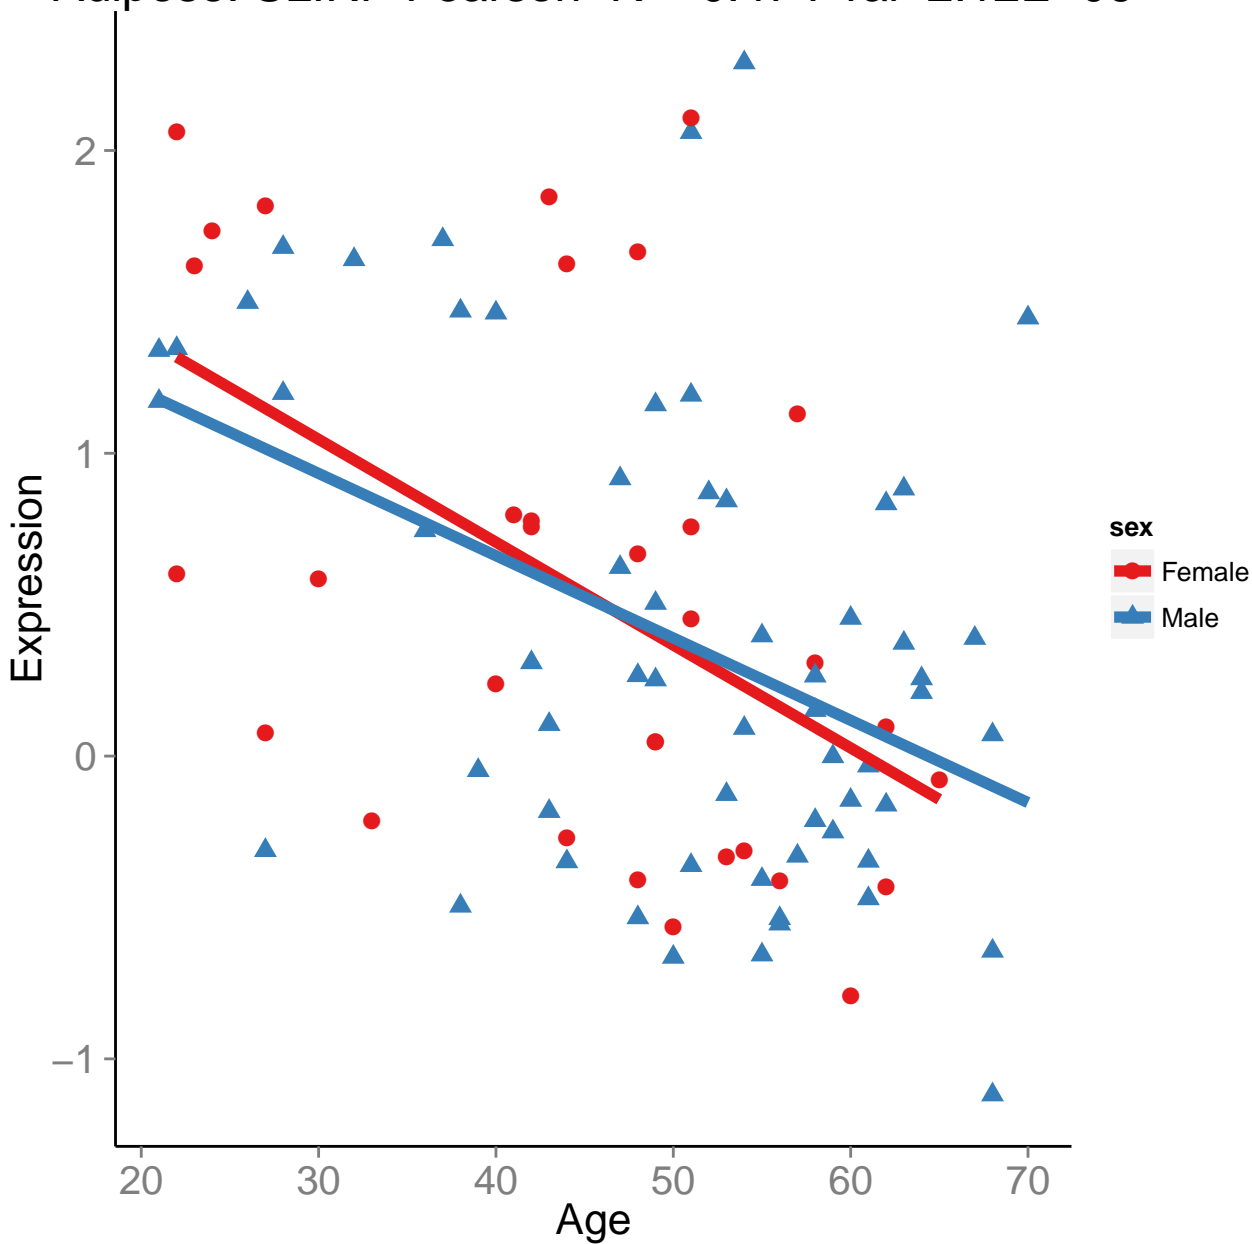

Adipose: MYO1E Pearson-R=0.47 Pval=1.99E-06

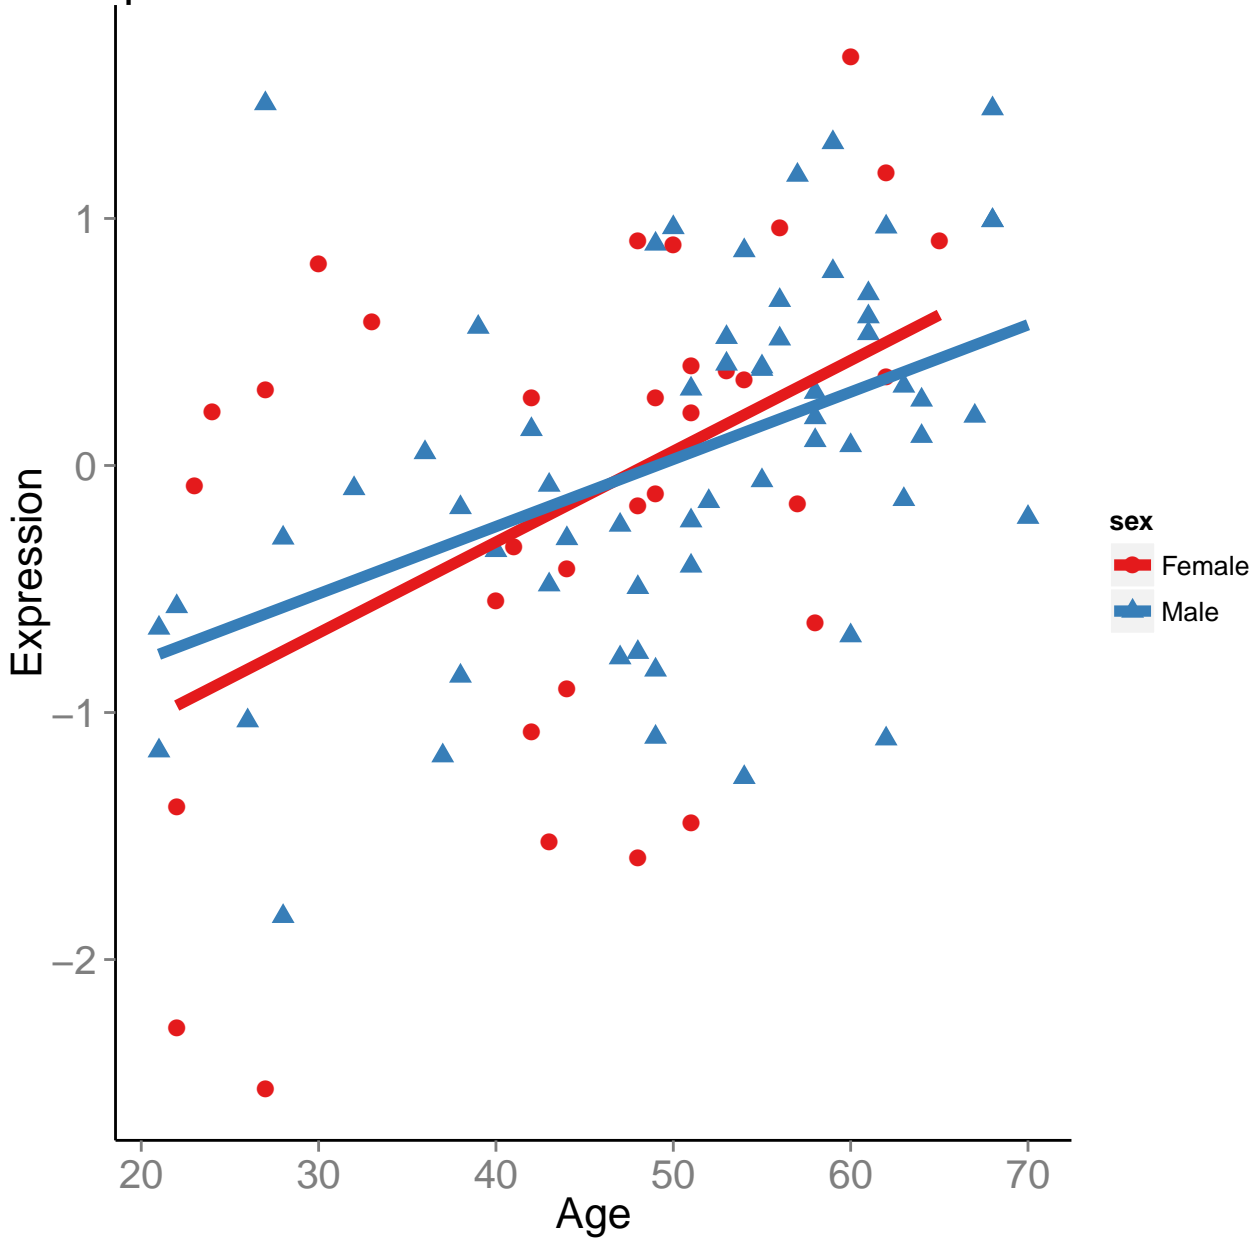

Adipose: ACSL4 Pearson-R=-0.46 Pval=2.67E-06

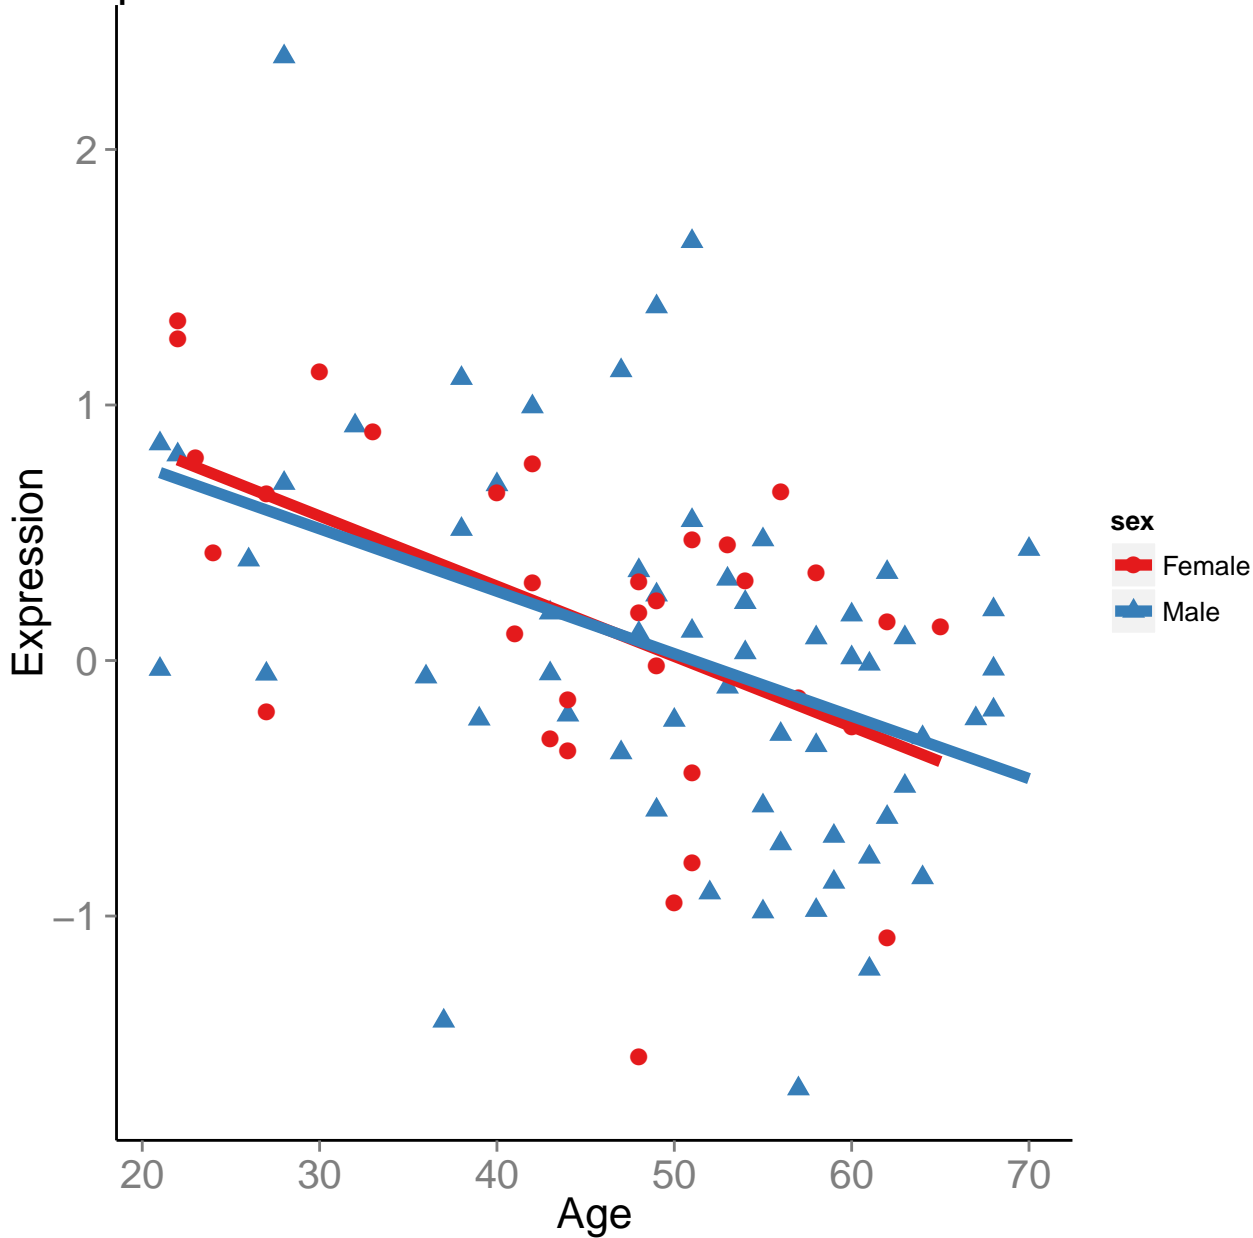

Adipose: PTPLAD2 Pearson-R=0.46 Pval=2.66E-06

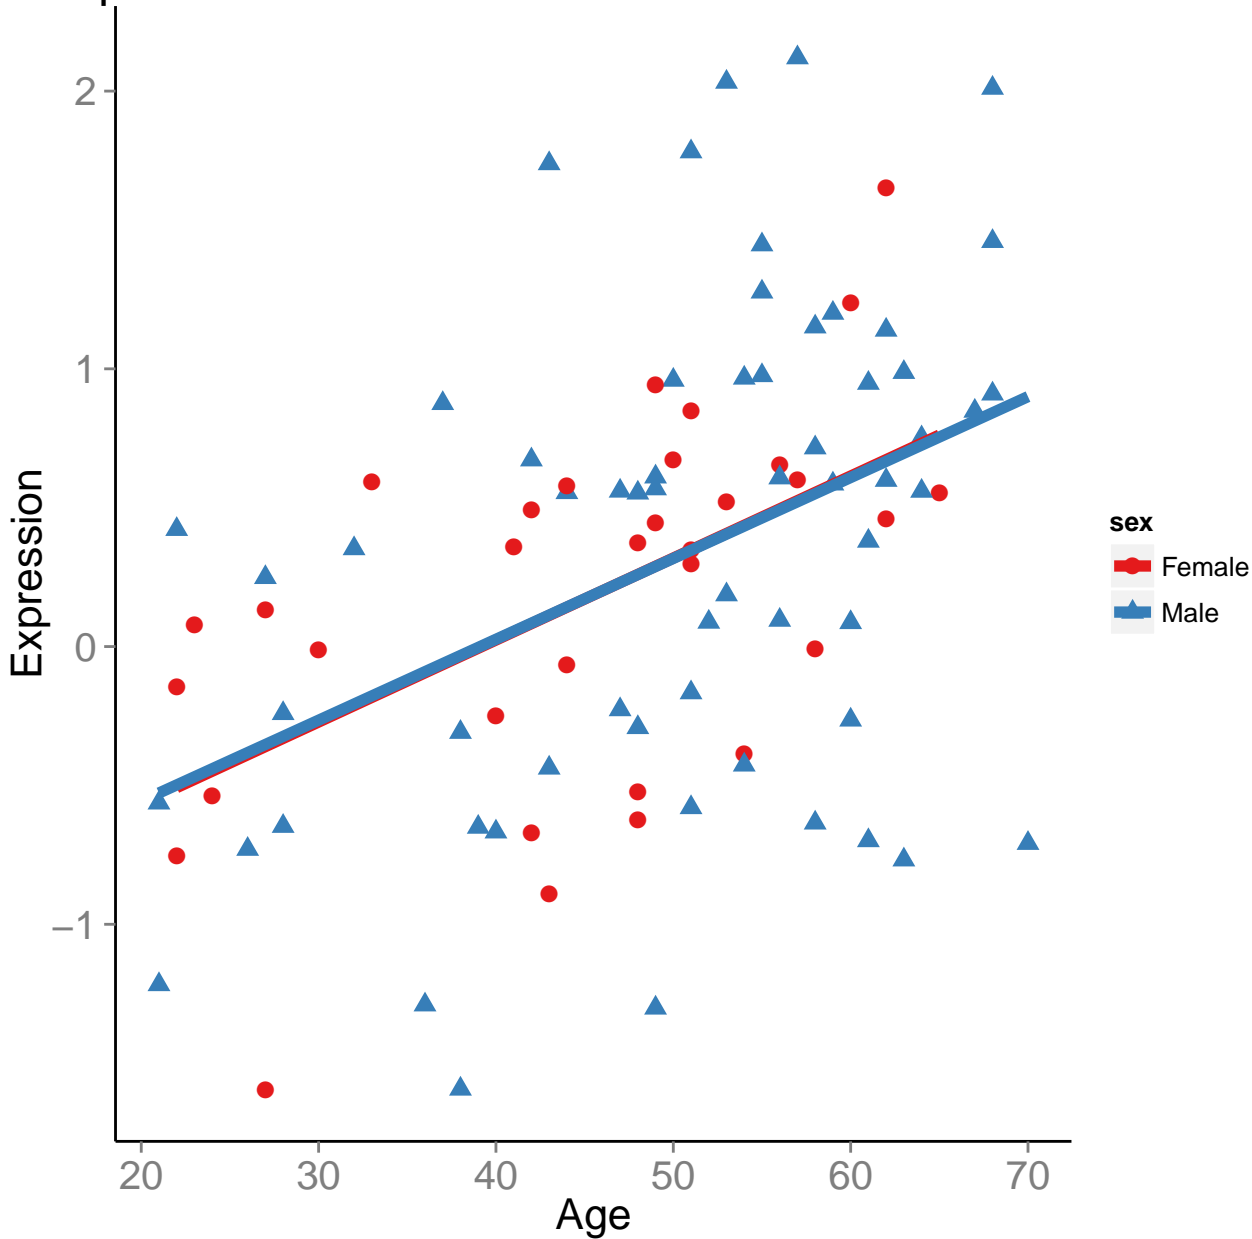



Adipose: ZDHHC7 Pearson-R=0.46 Pval=2.69E-06

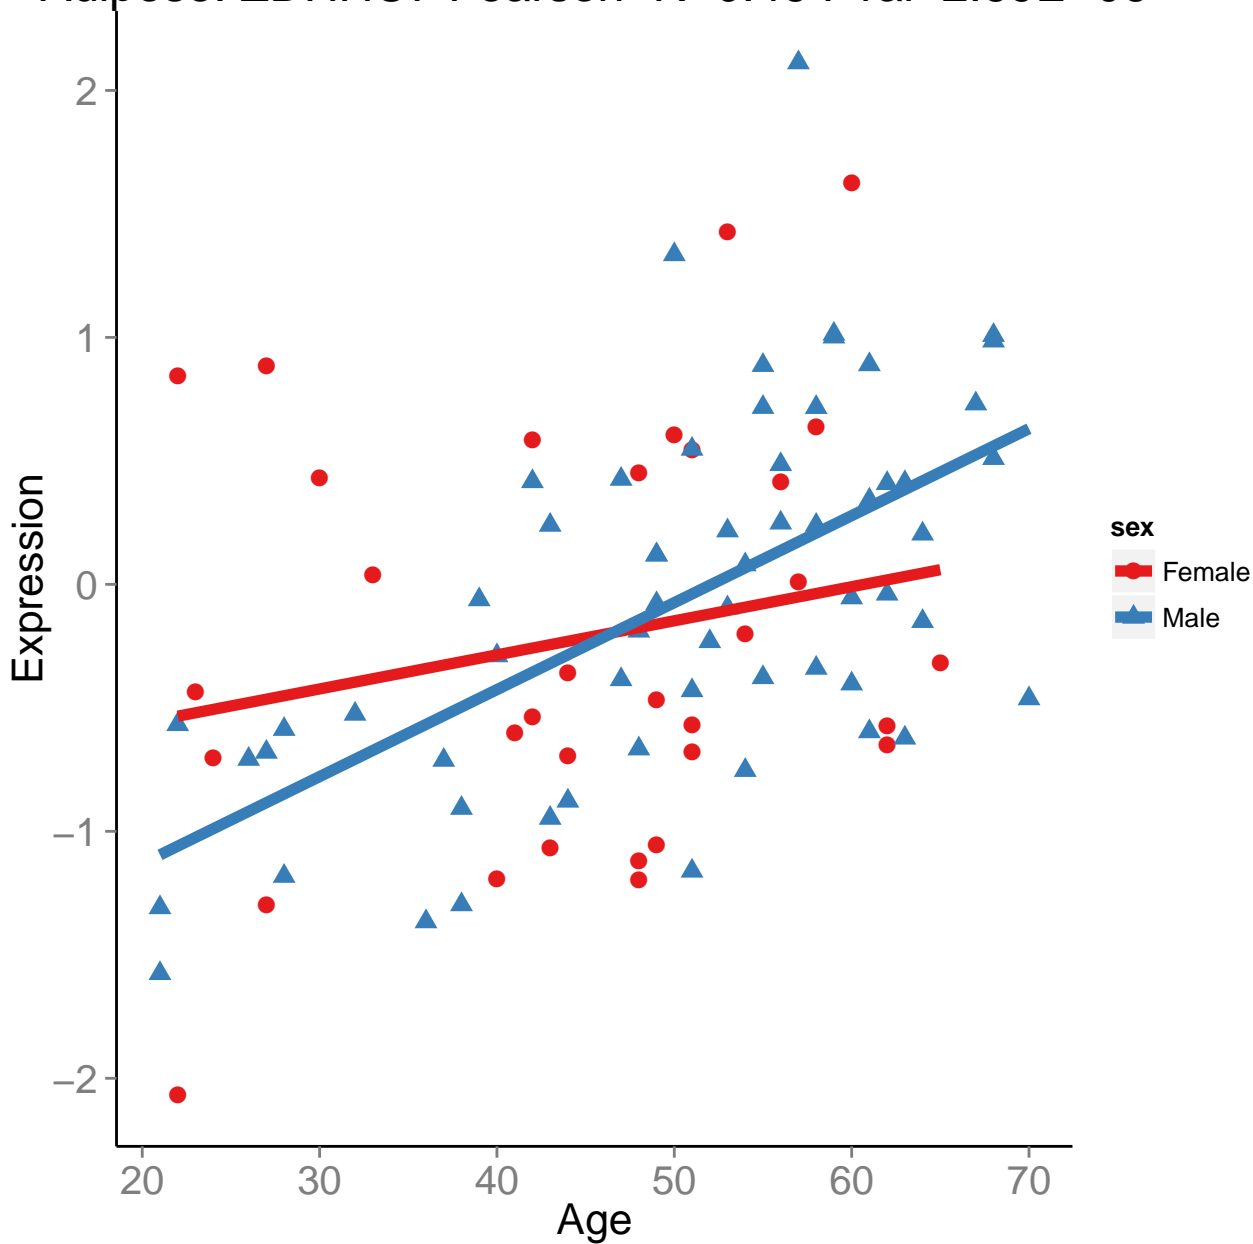

Adipose: AMY2B Pearson-R=0.46 Pval=2.98E-06

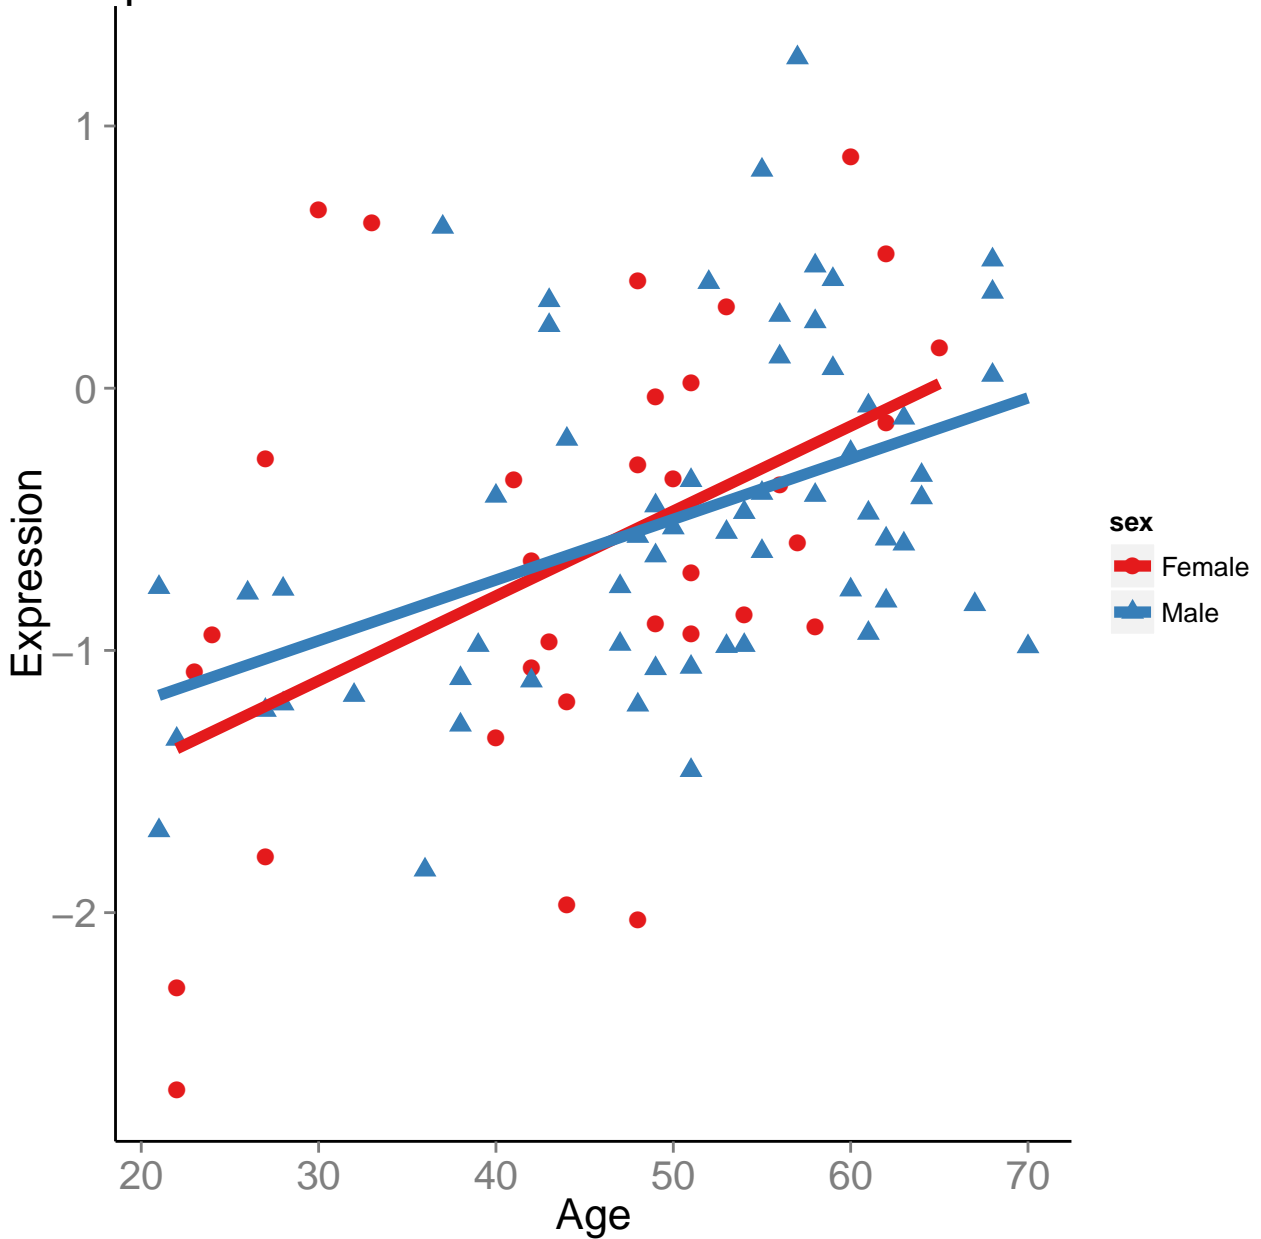

Adipose: CNNM4 Pearson-R=0.46 Pval=3.00E-06

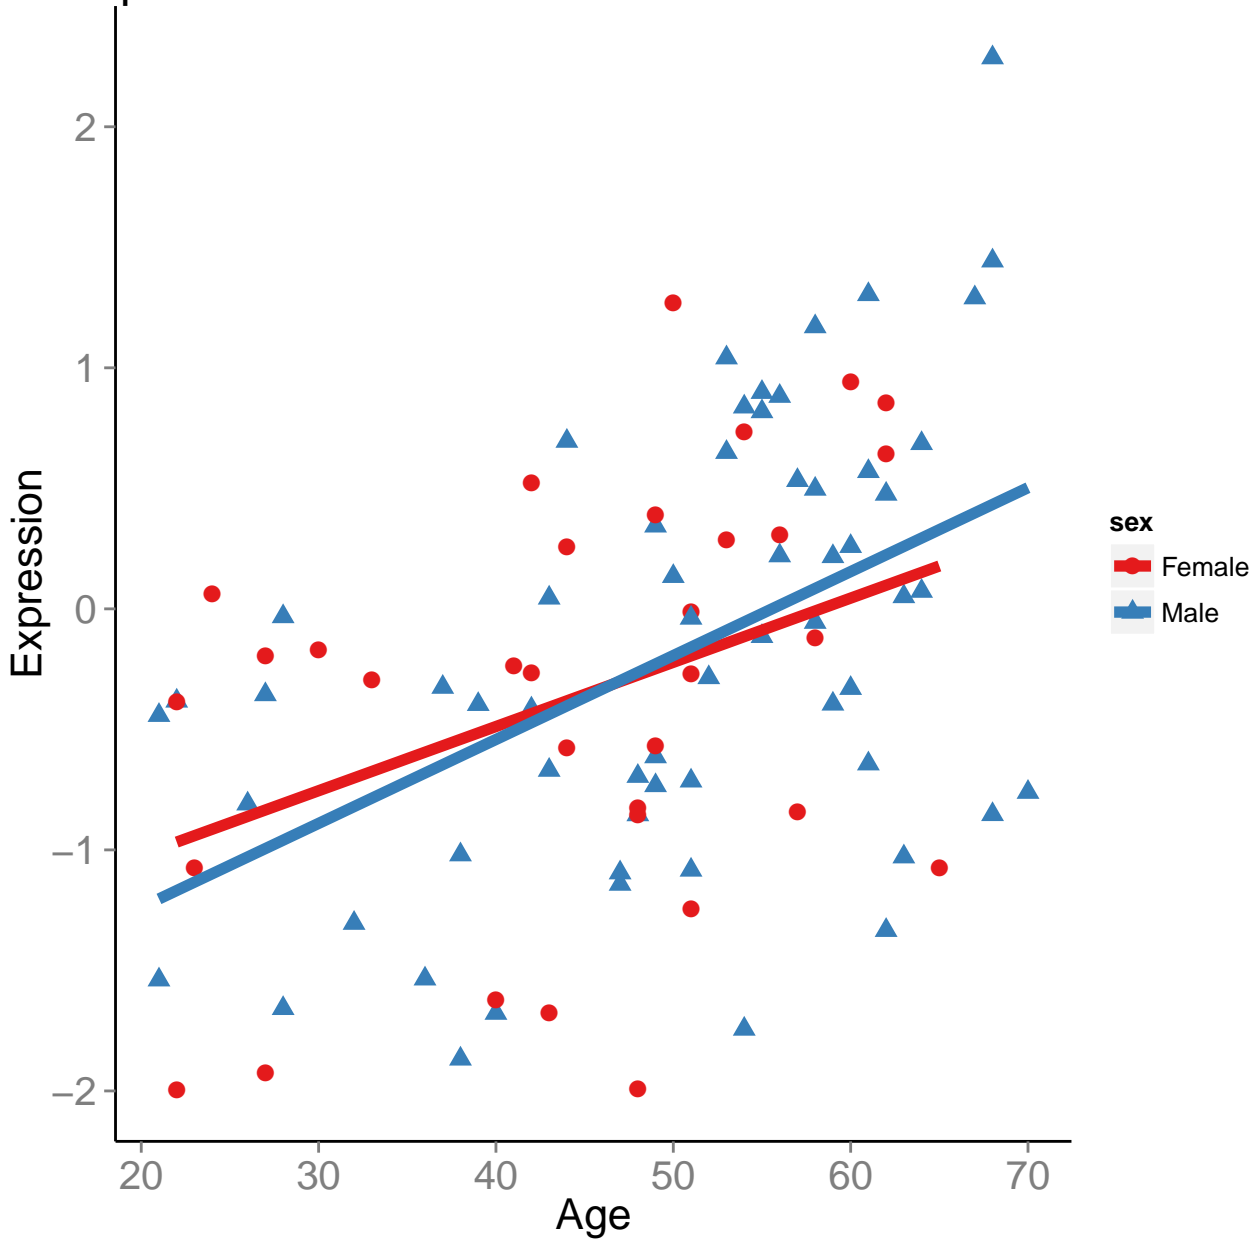

Adipose: KIAA1755 Pearson-R=0.46 Pval=2.77E-06

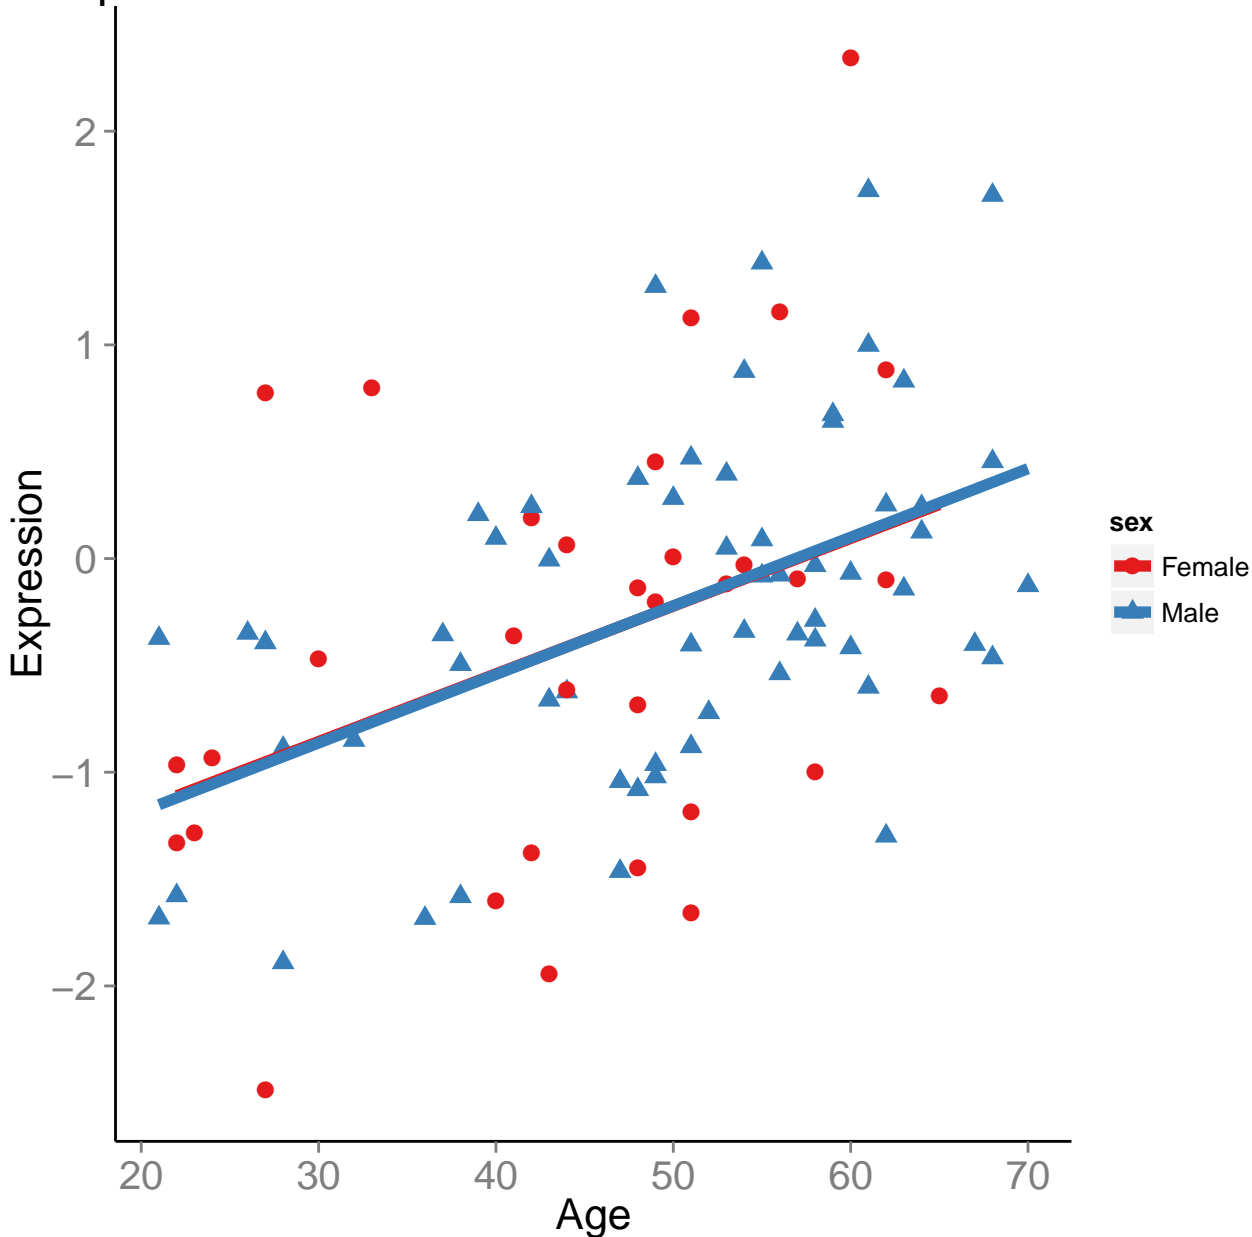

Adipose: FZD1 Pearson-R=0.46 Pval=2.74E-06

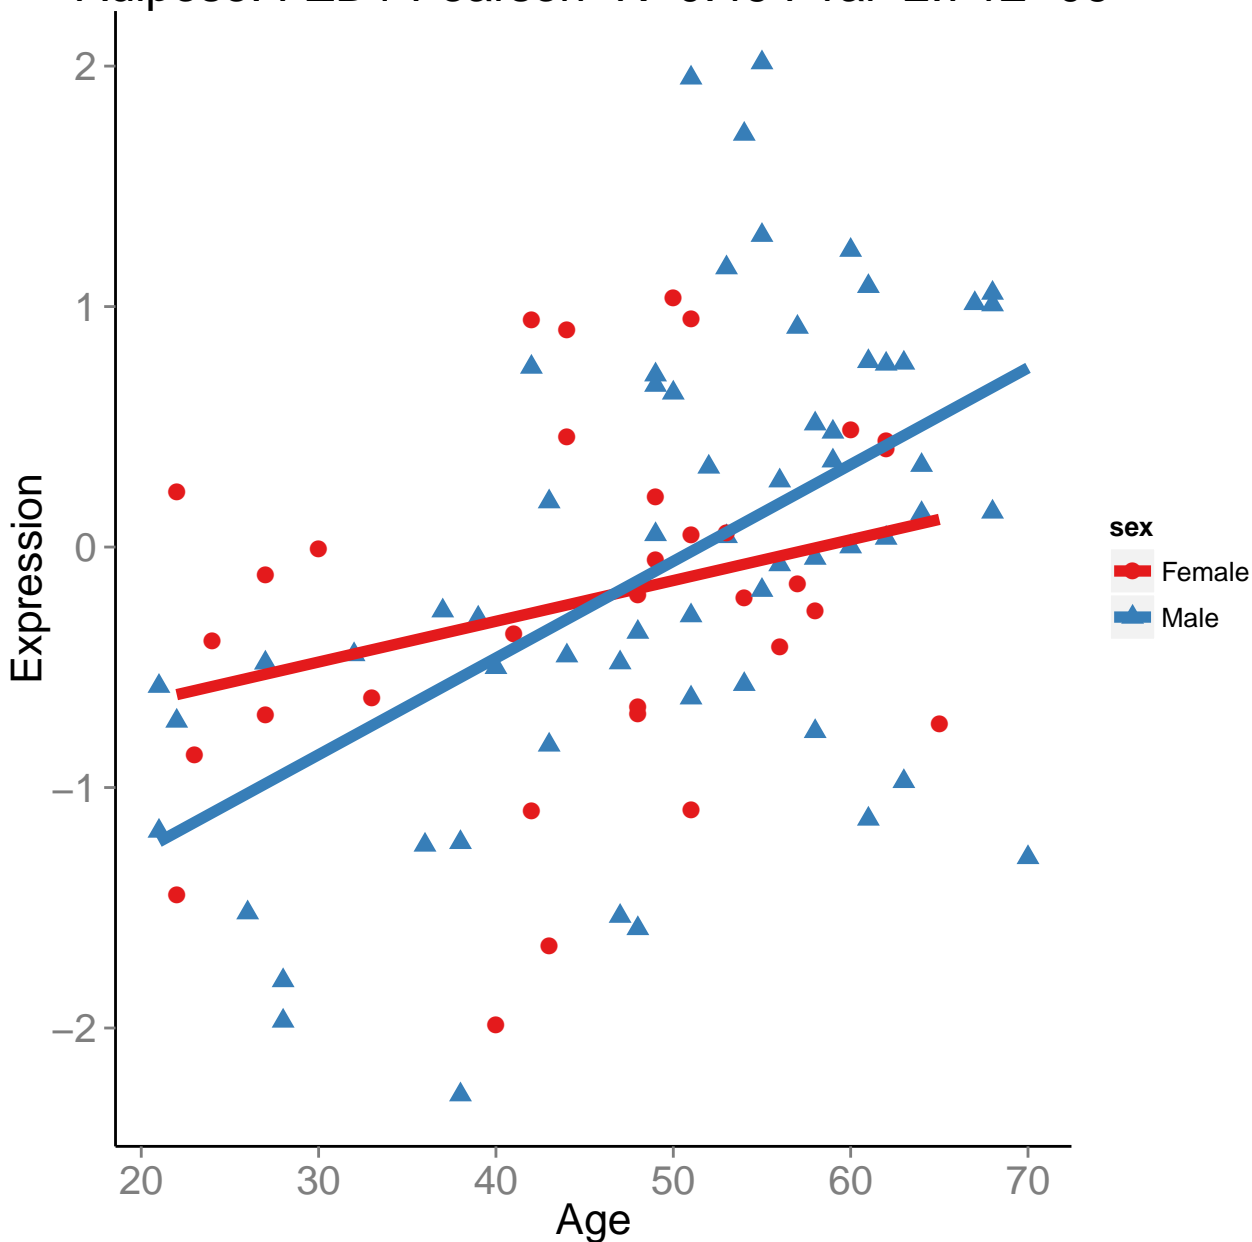

Artery: CADPS2 Pearson-R=0.64 Pval=5.31E-14

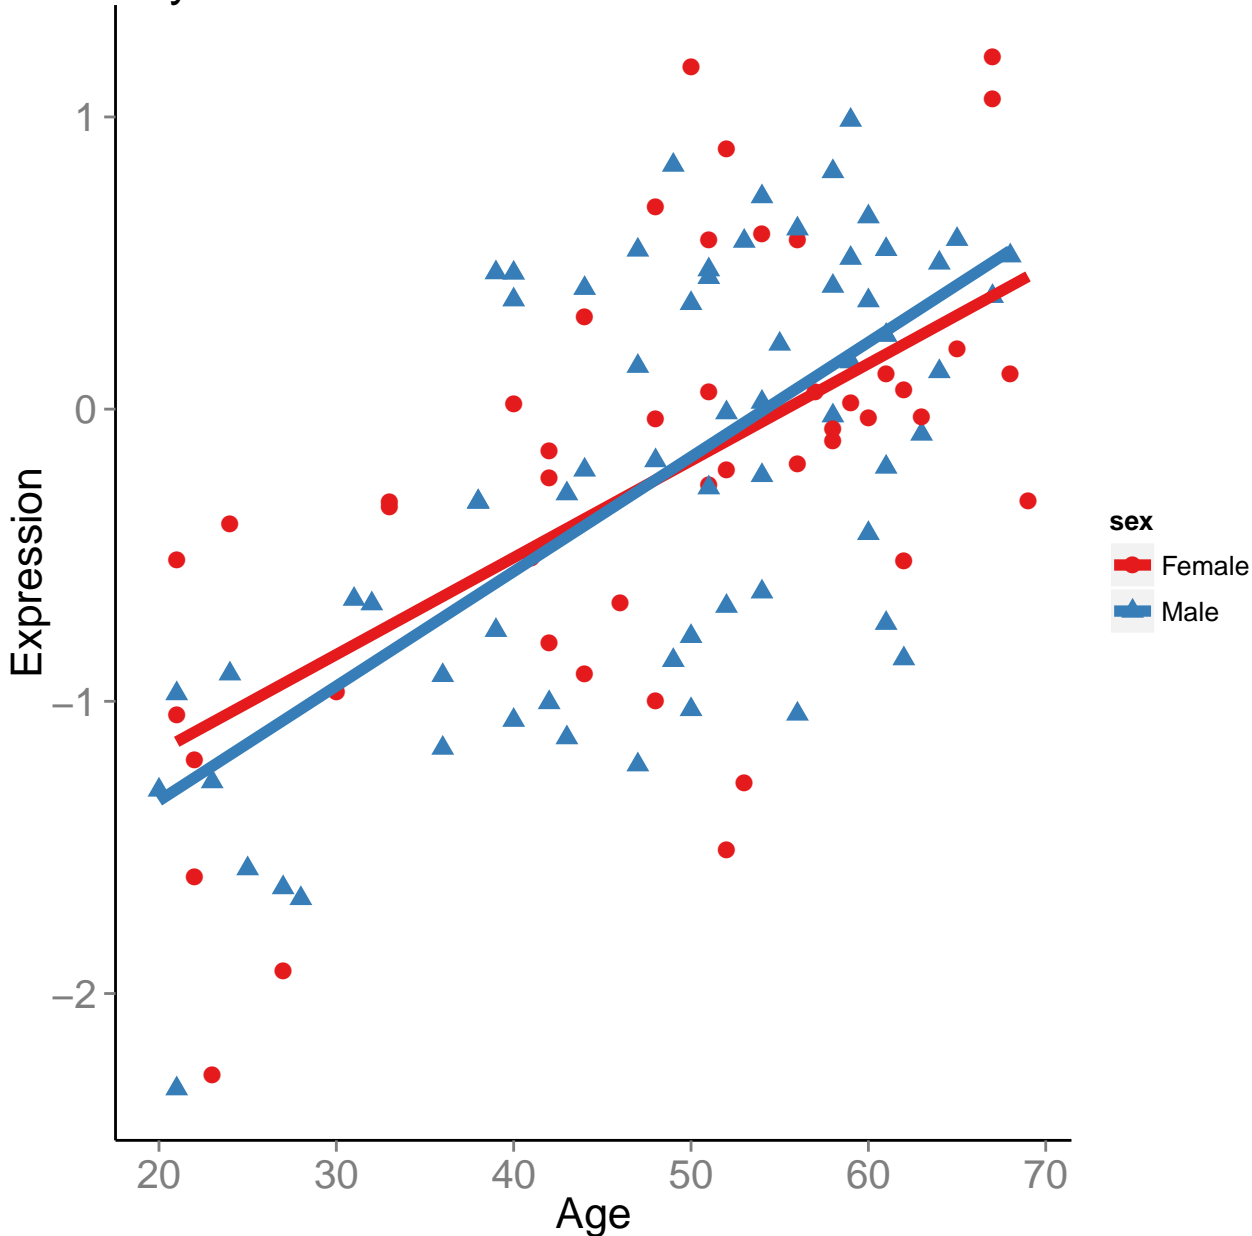

Artery: PCDH10 Pearson-R=0.63 Pval=9.53E-14

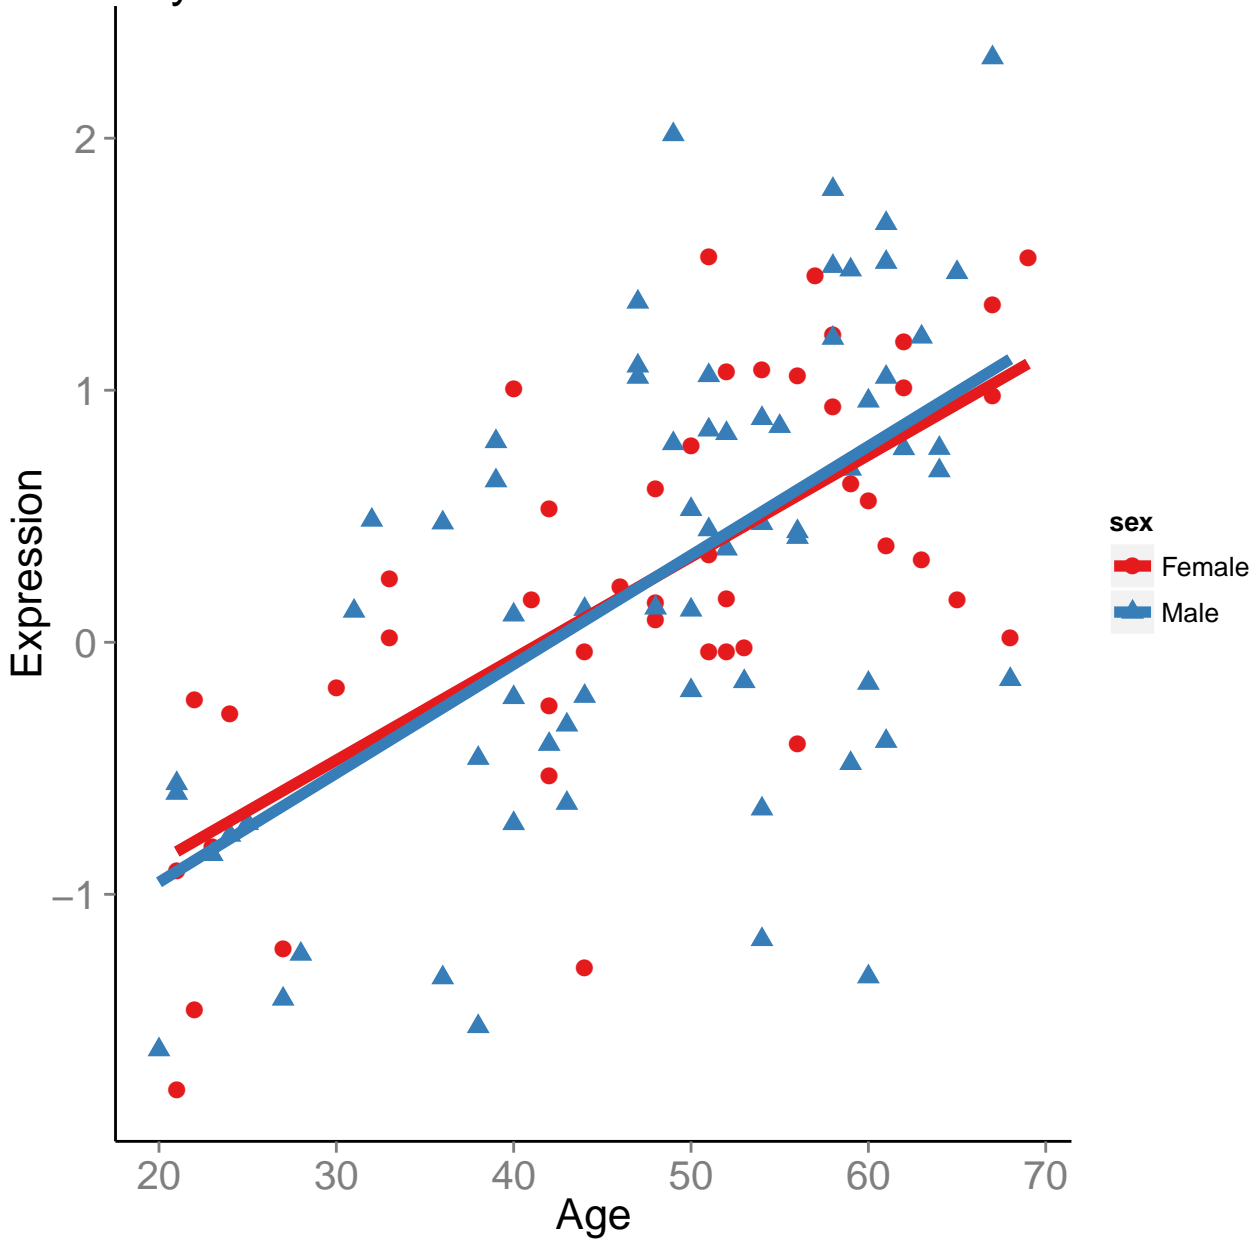

Artery: RPL29P19 Pearson-R=0.61 Pval=1.16E-12

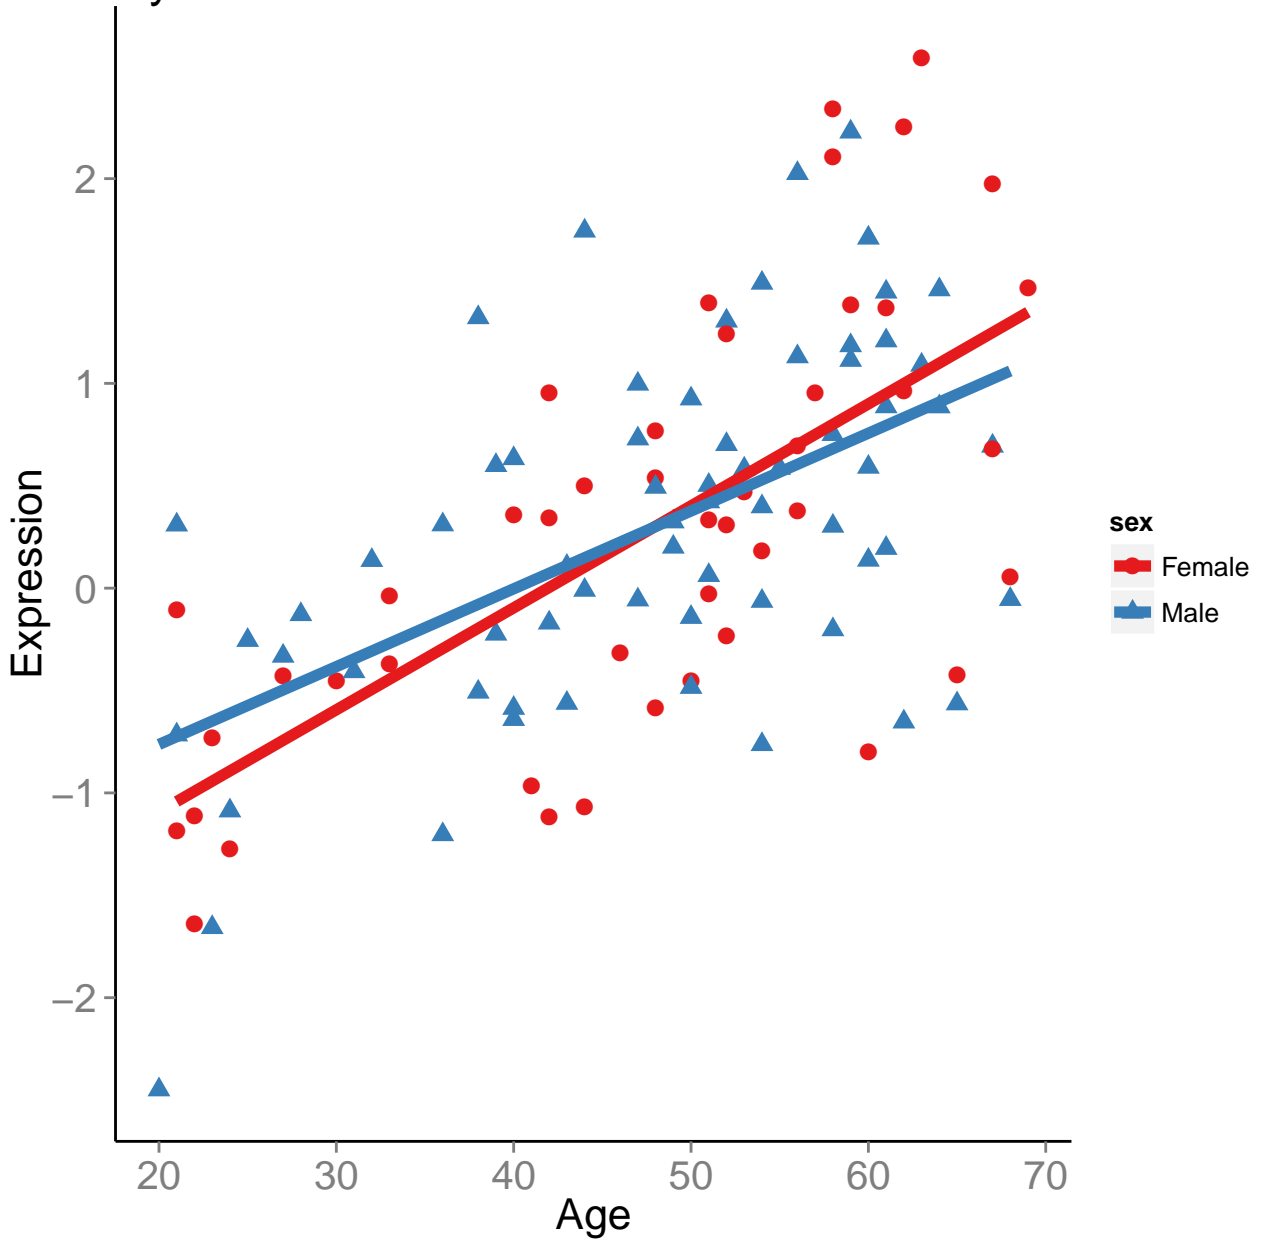



Artery: RP11-574K11.16 Pearson-R=0.61 Pval=1.10E-12

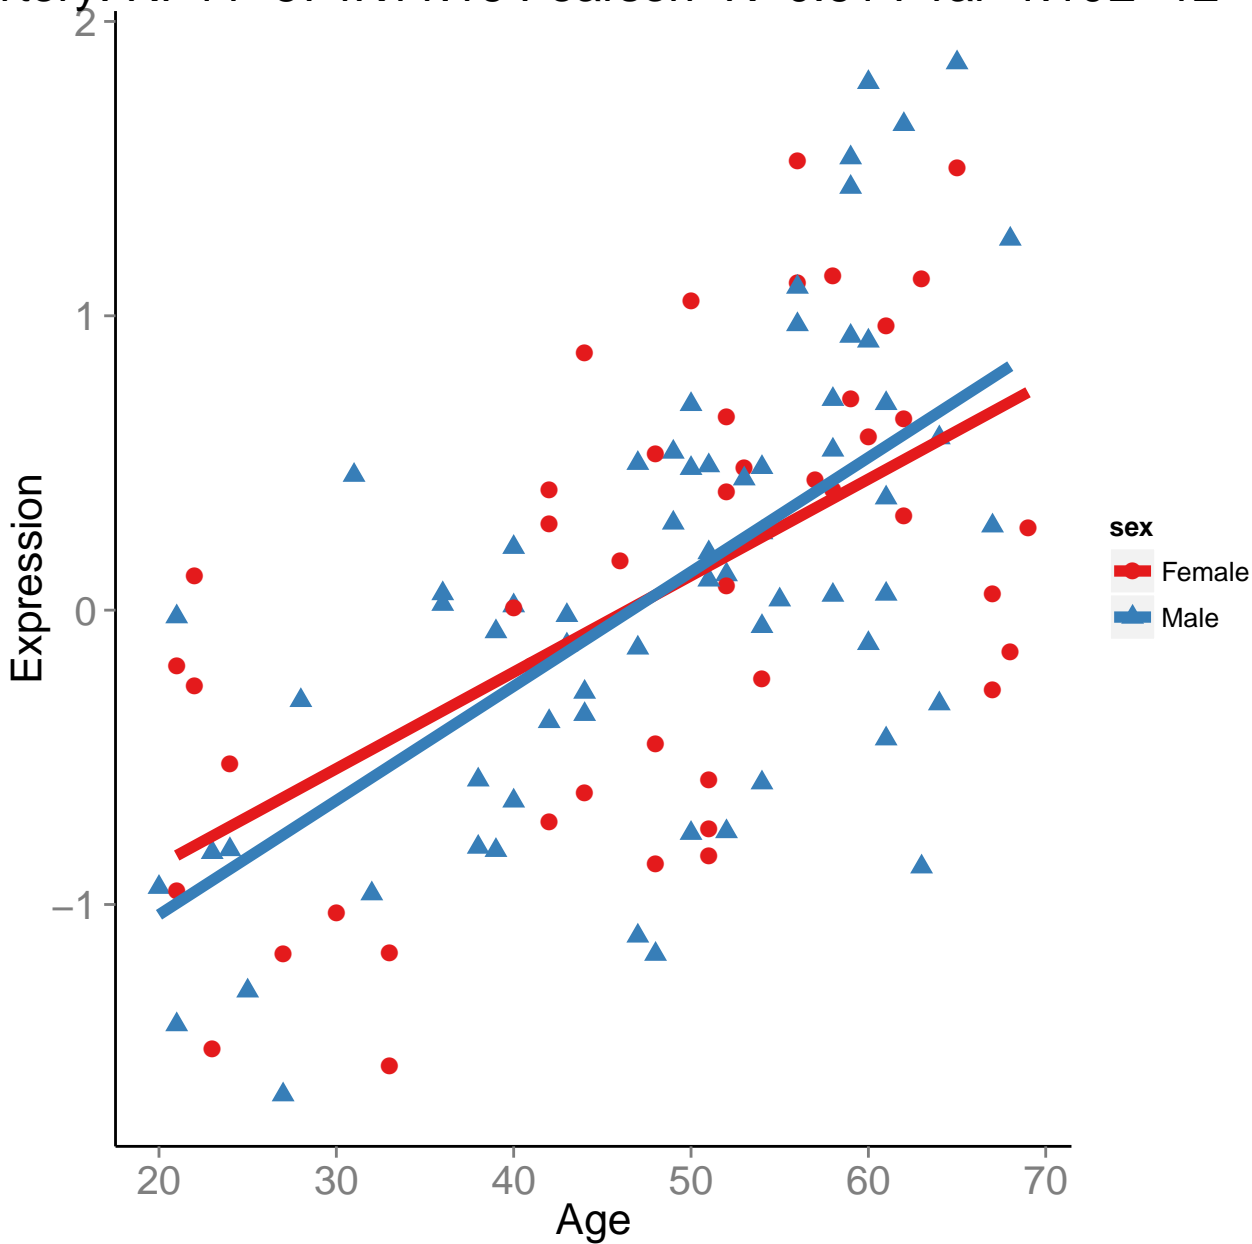

Artery: RUNX2 Pearson-R=0.59 Pval=9.00E-12

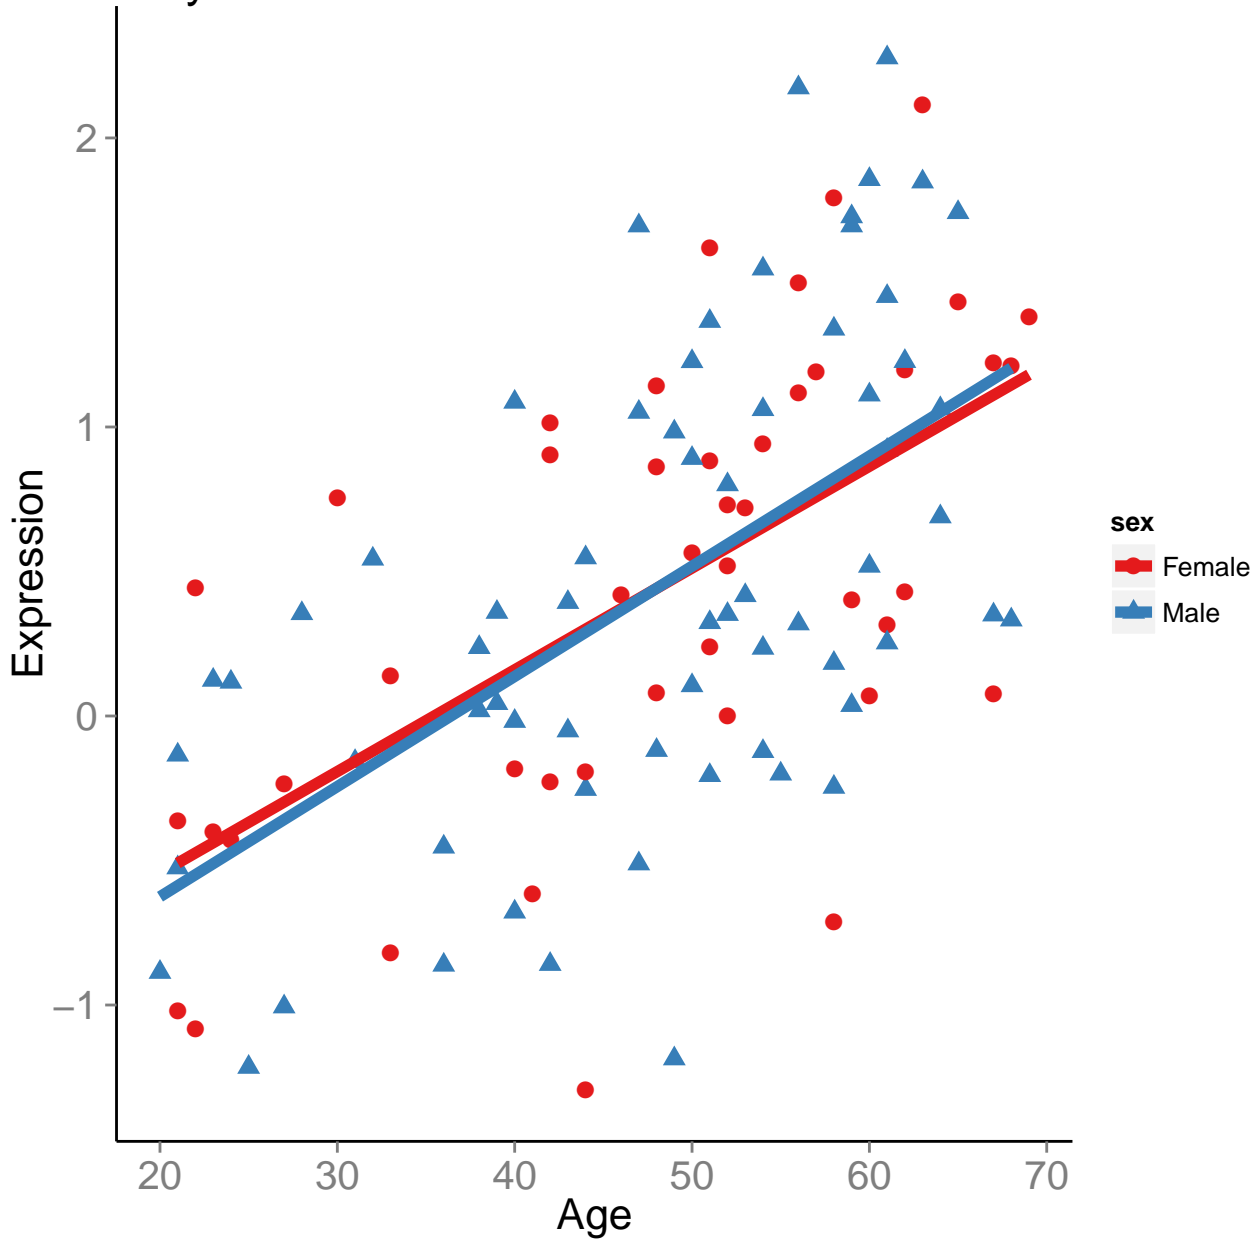

Artery: LPAR2 Pearson-R=0.59 Pval=1.19E-11

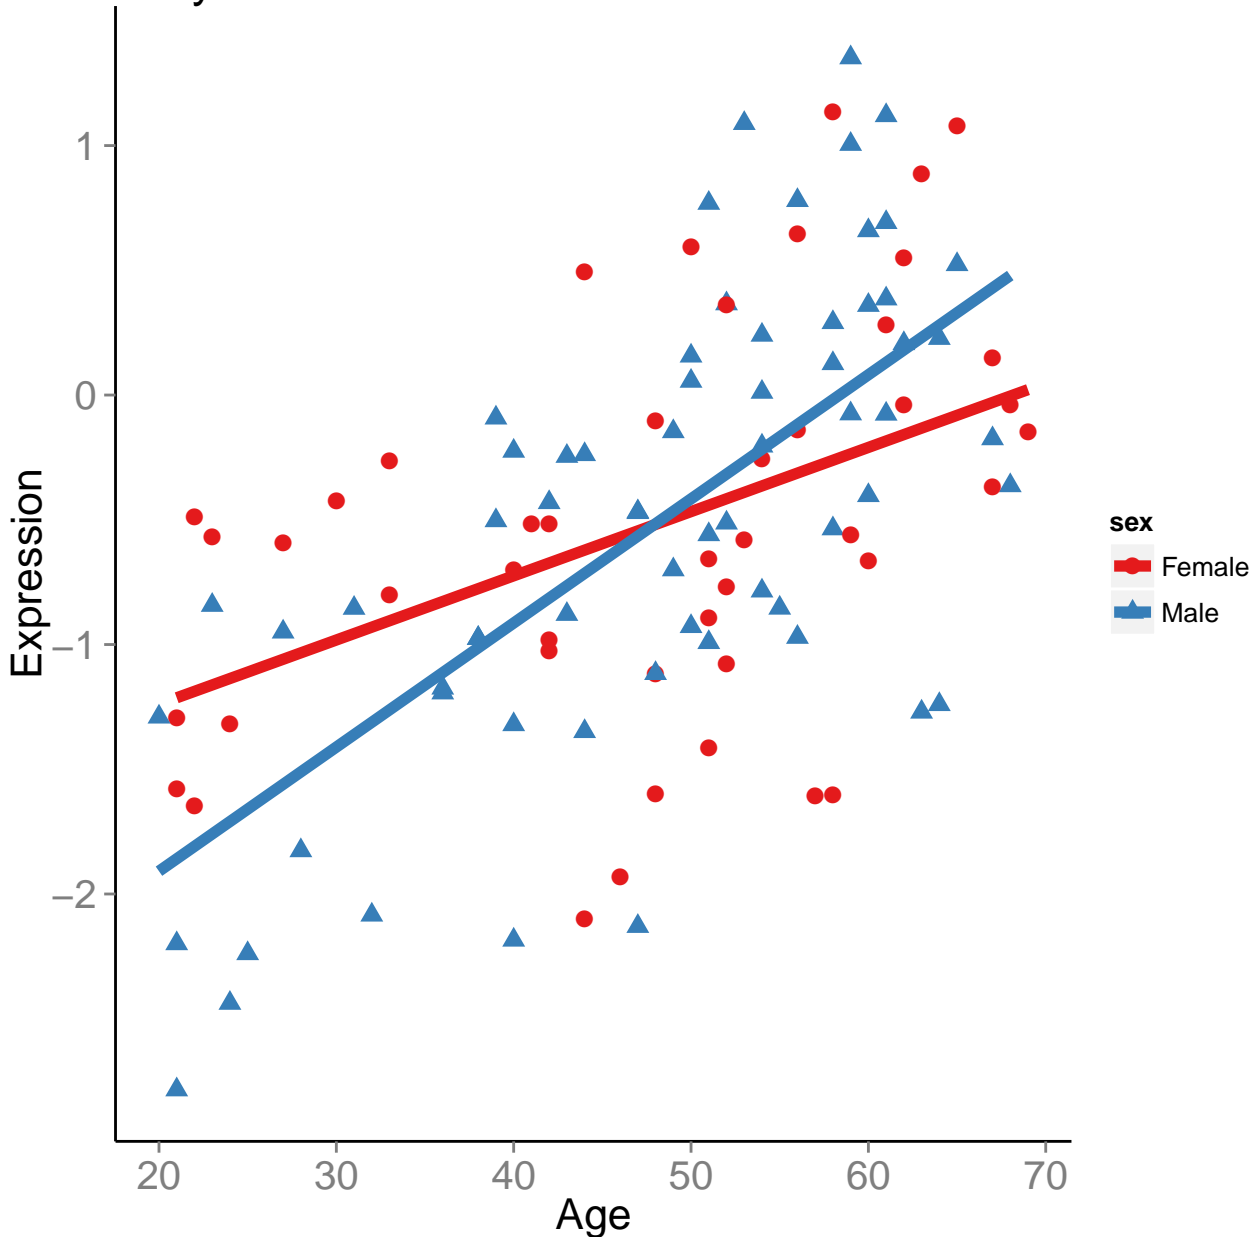

Artery: GGT7 Pearson-R=0.58 Pval=1.65E-11

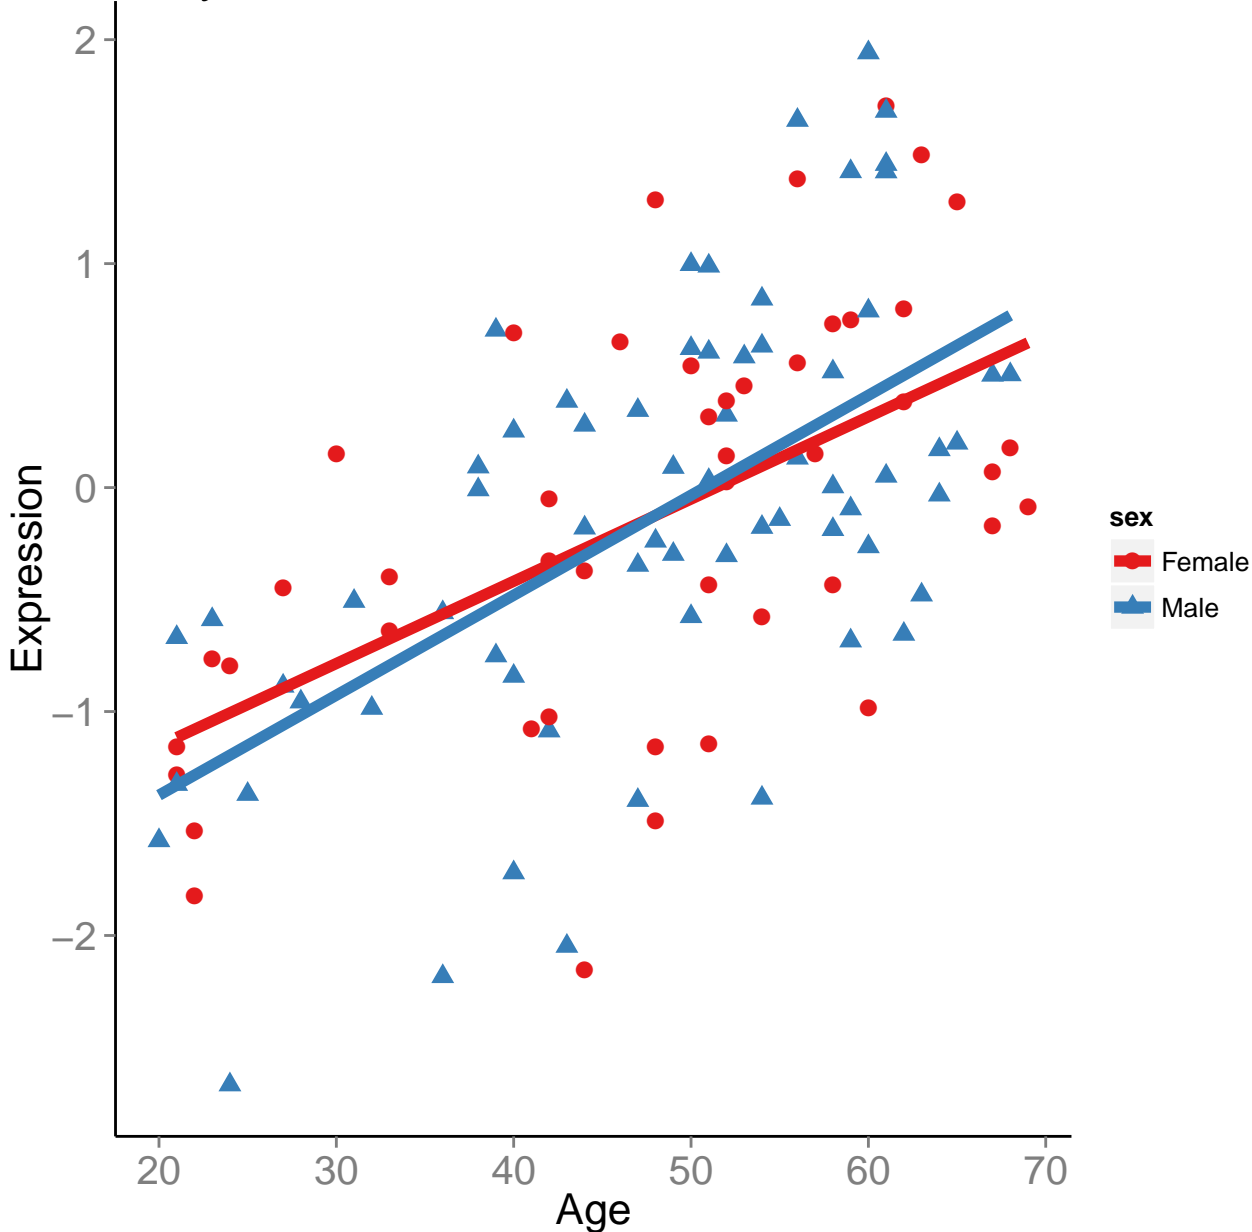

Artery: EDA2R Pearson-R=0.58 Pval=2.13E-11

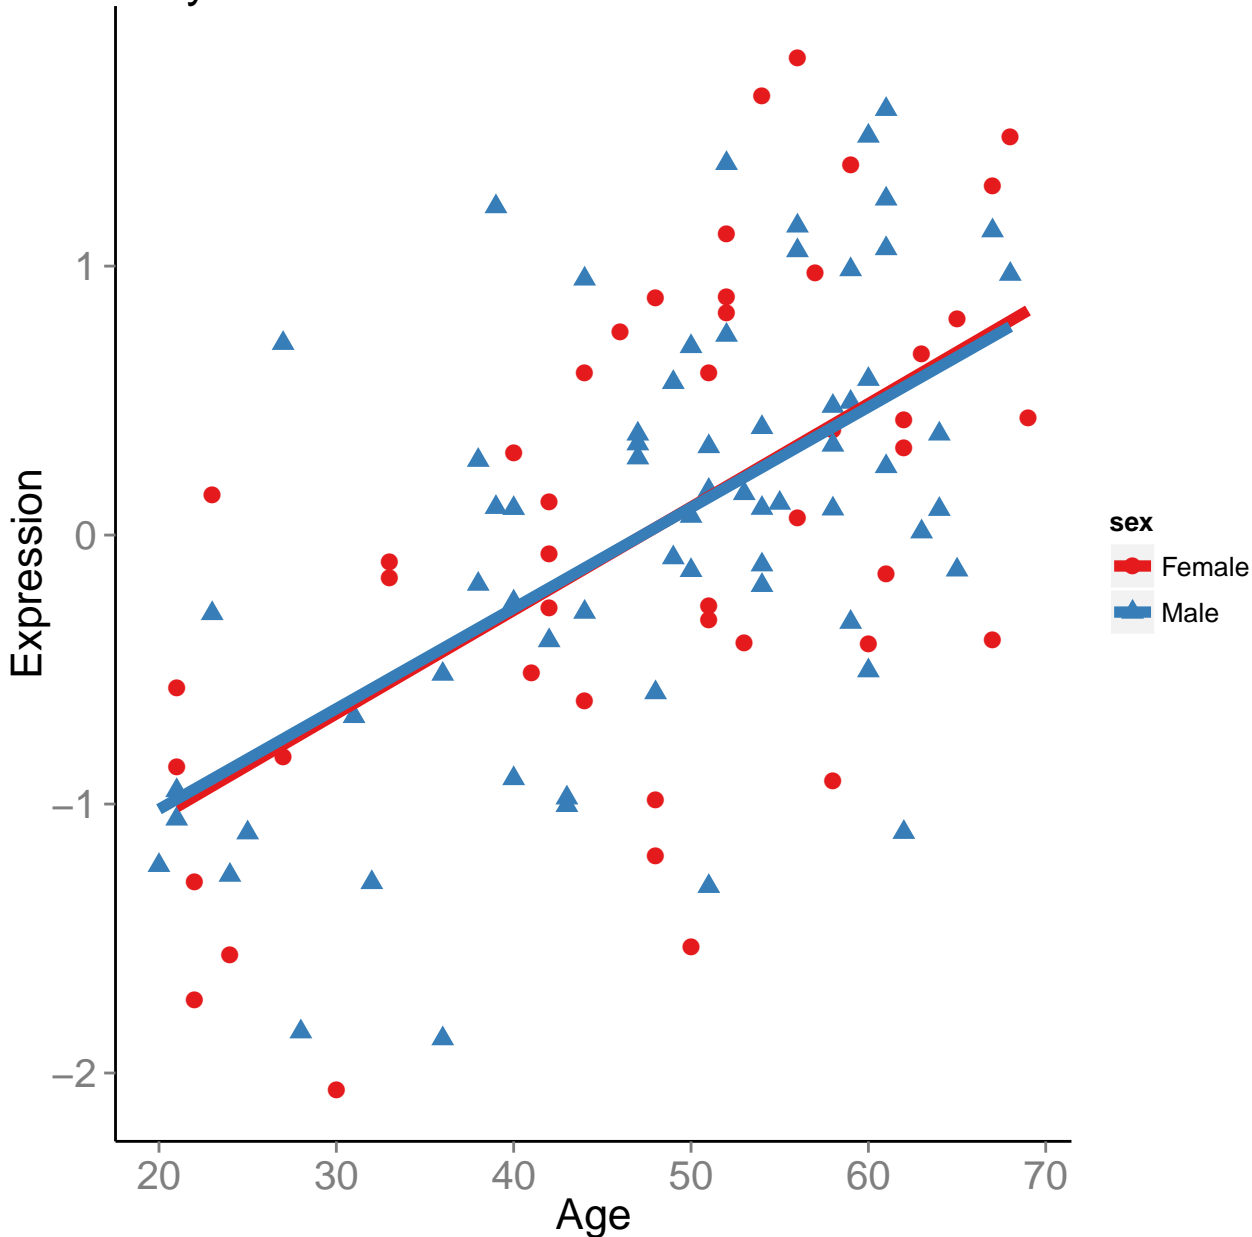

Artery: TRIM22 Pearson-R=0.57 Pval=3.82E-11

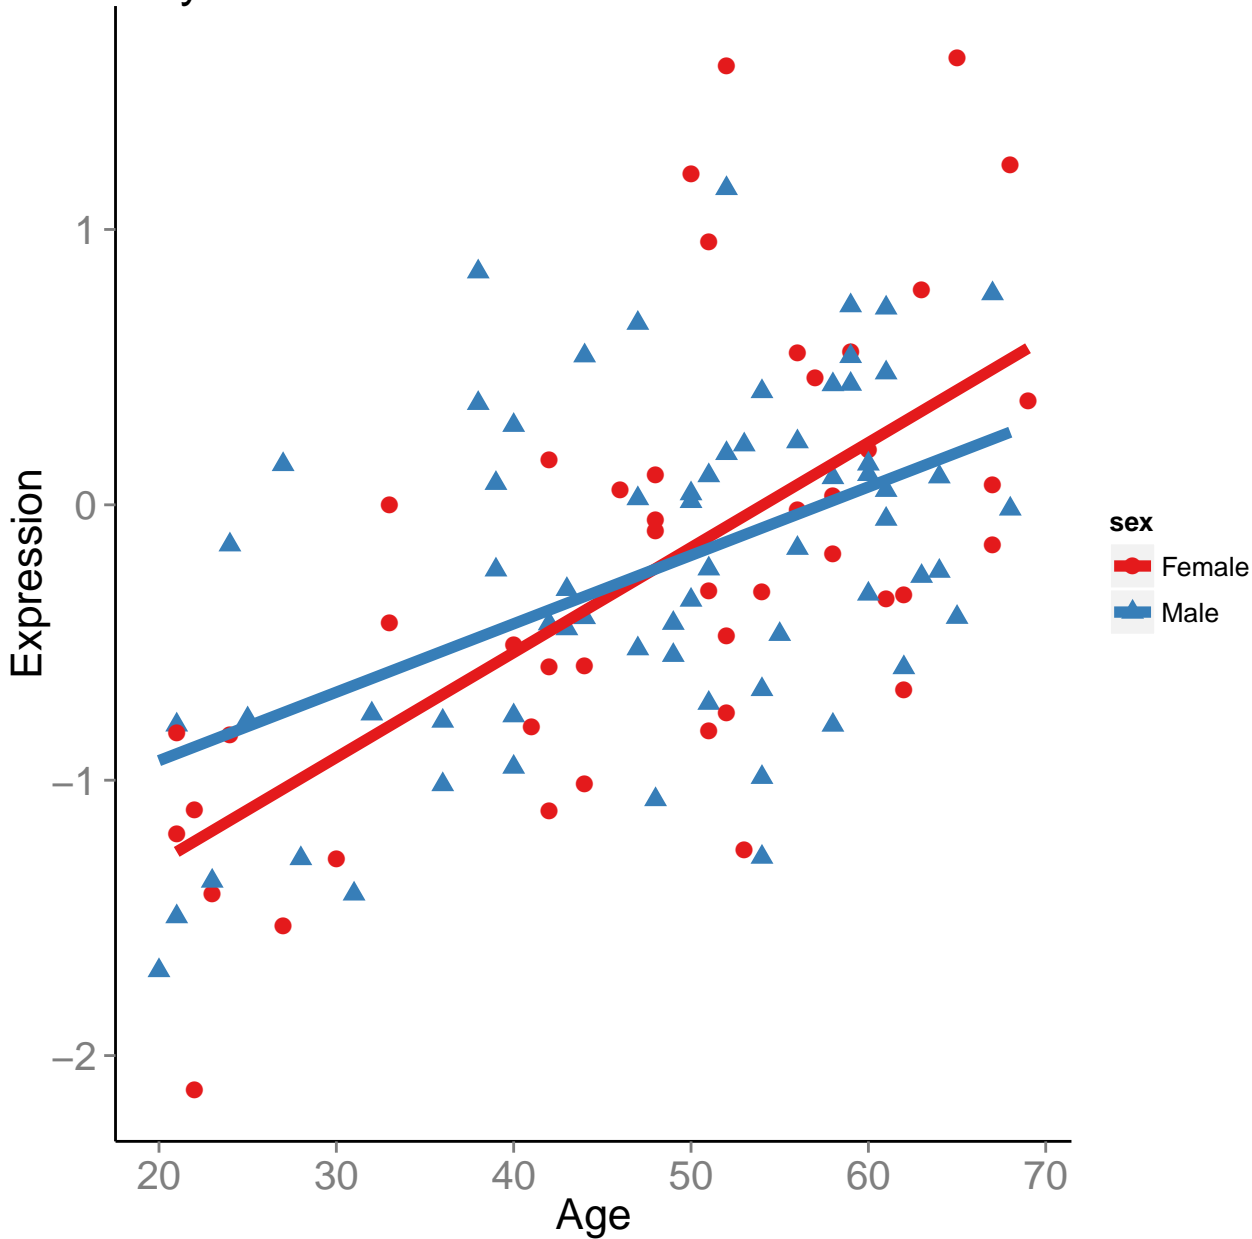

Artery: KCNK2 Pearson-R=0.56 Pval=1.36E-10

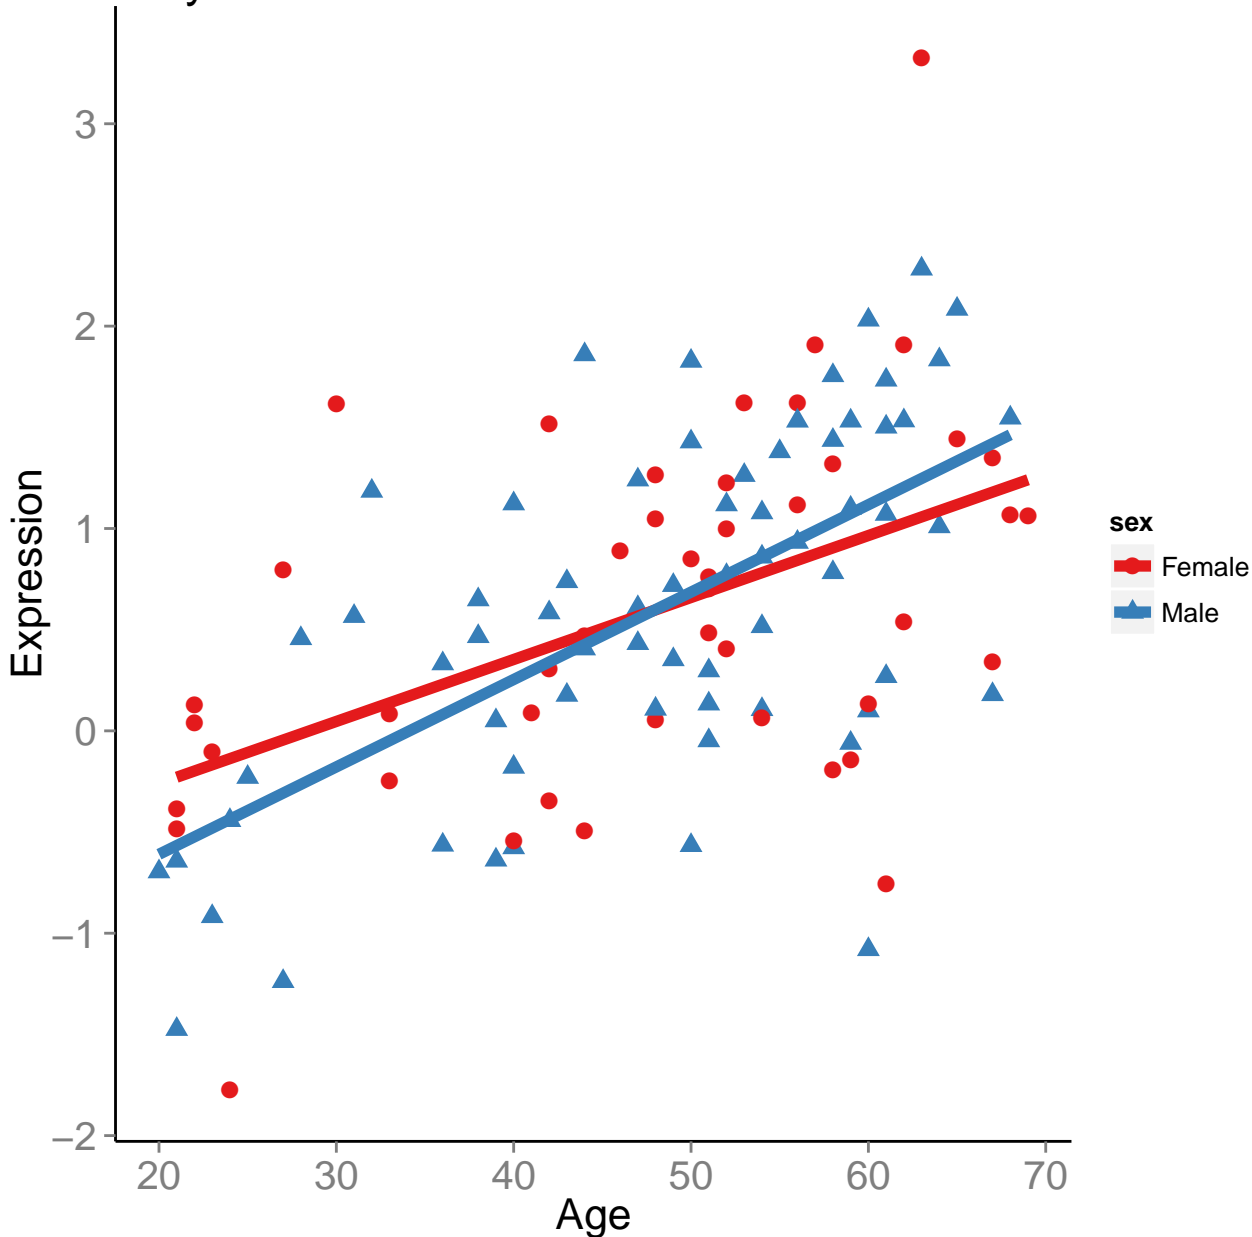

Artery: PCDH9 Pearson-R=0.56 Pval=2.00E-10

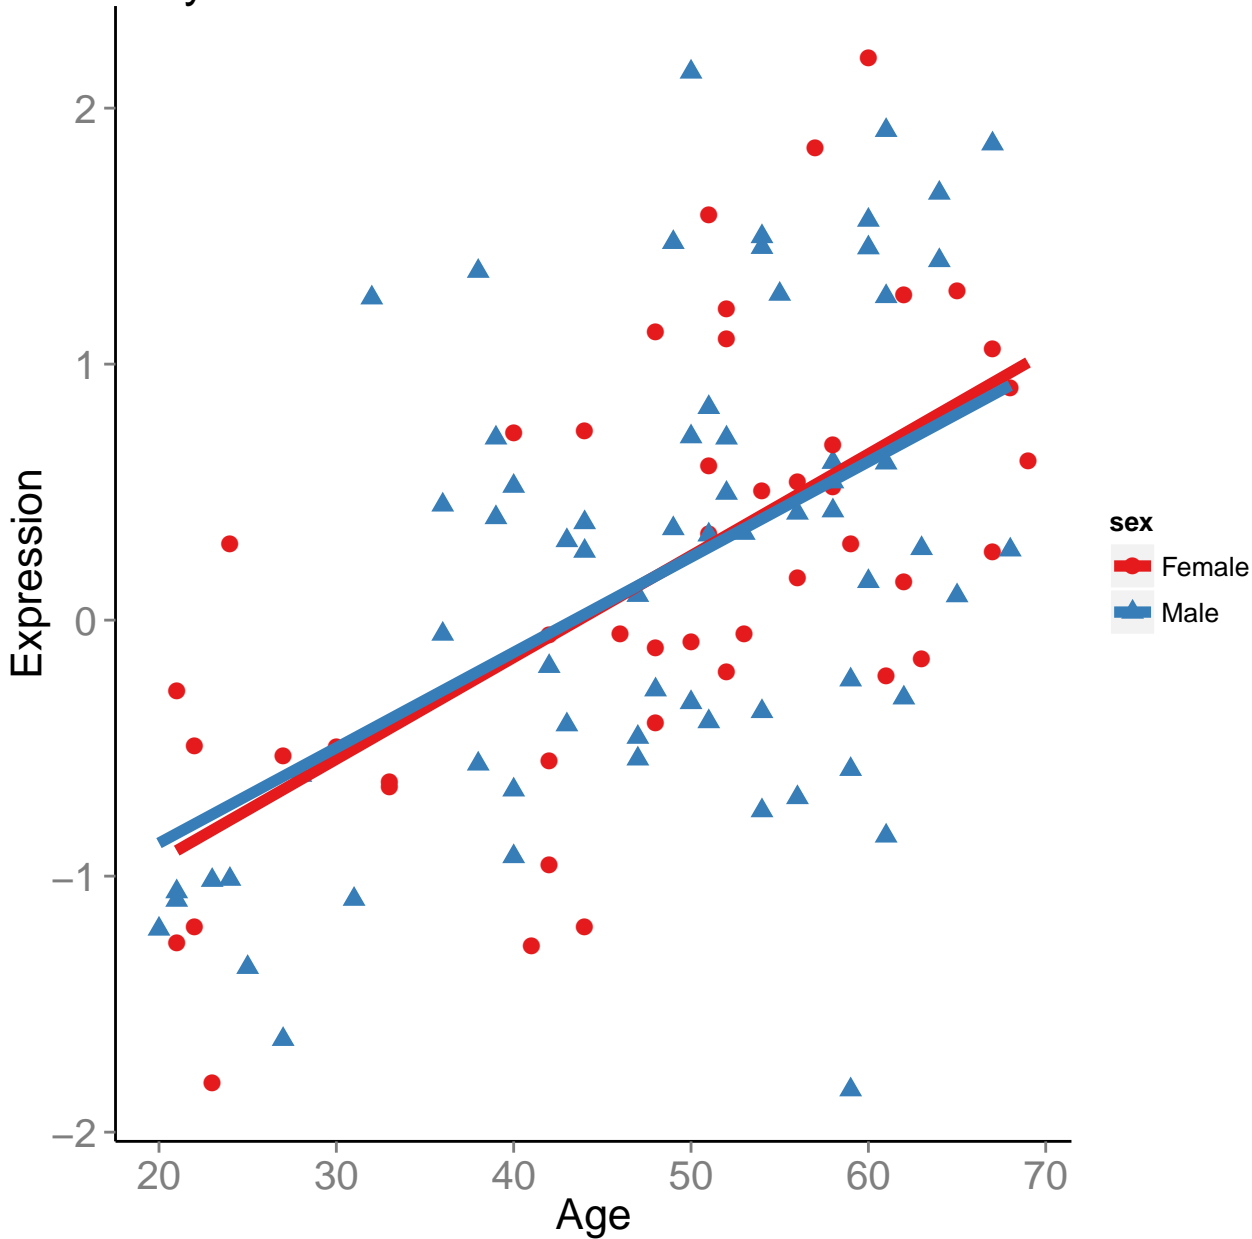



Artery: OXER1 Pearson-R=0.55 Pval=3.50E-10

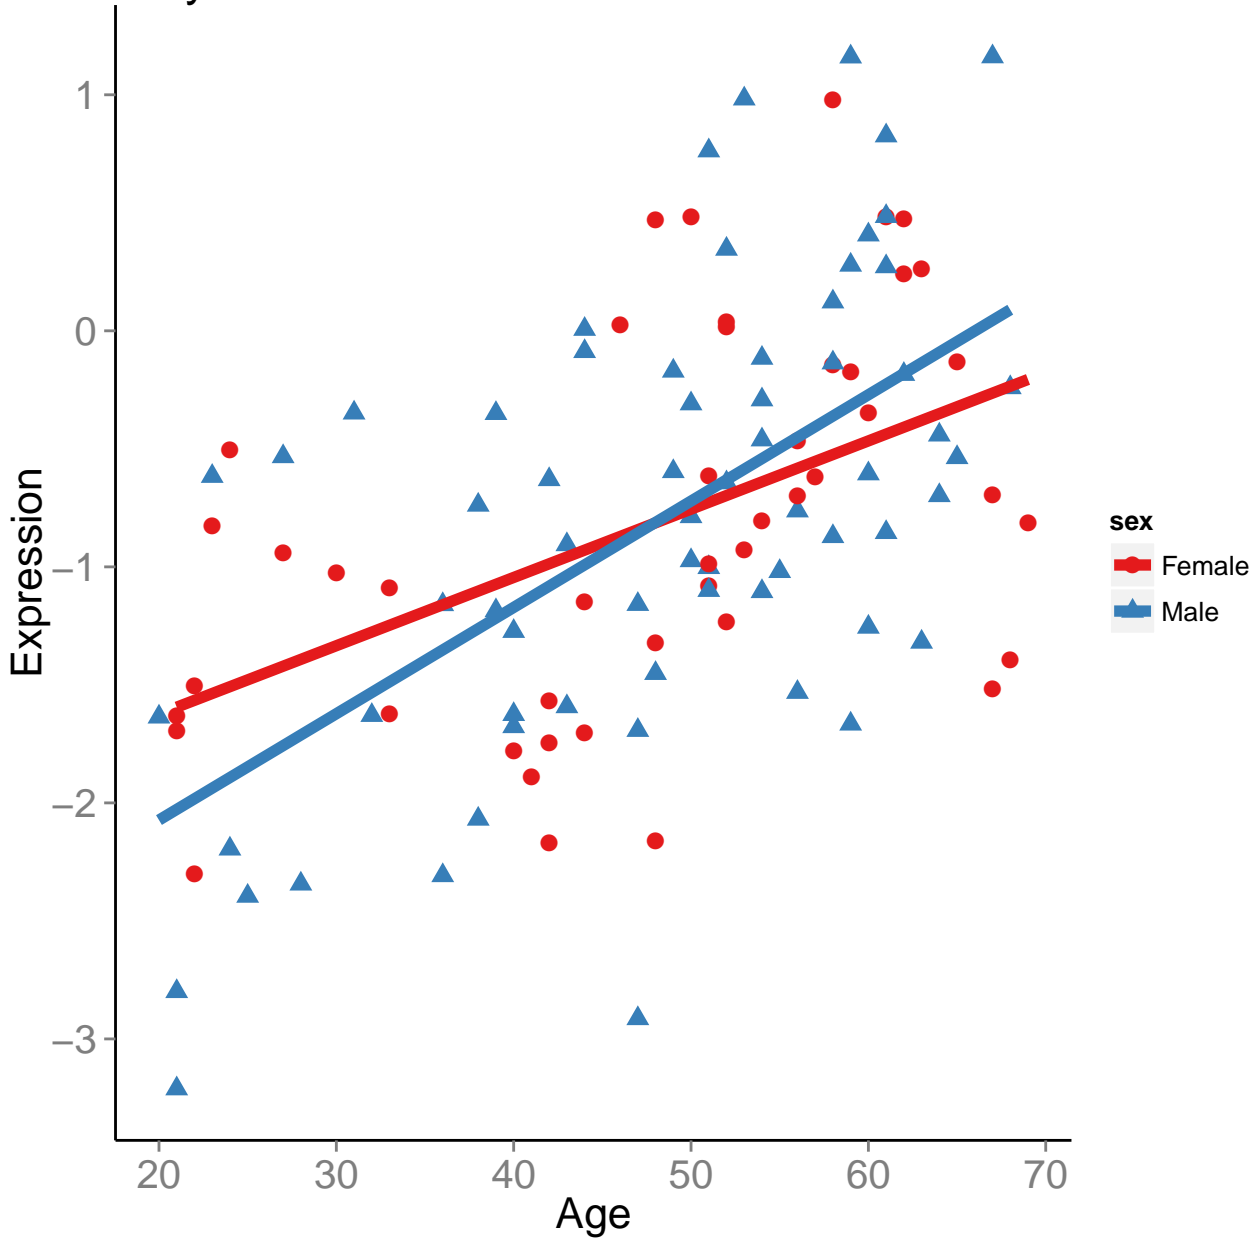

Artery: SCN3A Pearson-R=0.55 Pval=3.87E-10

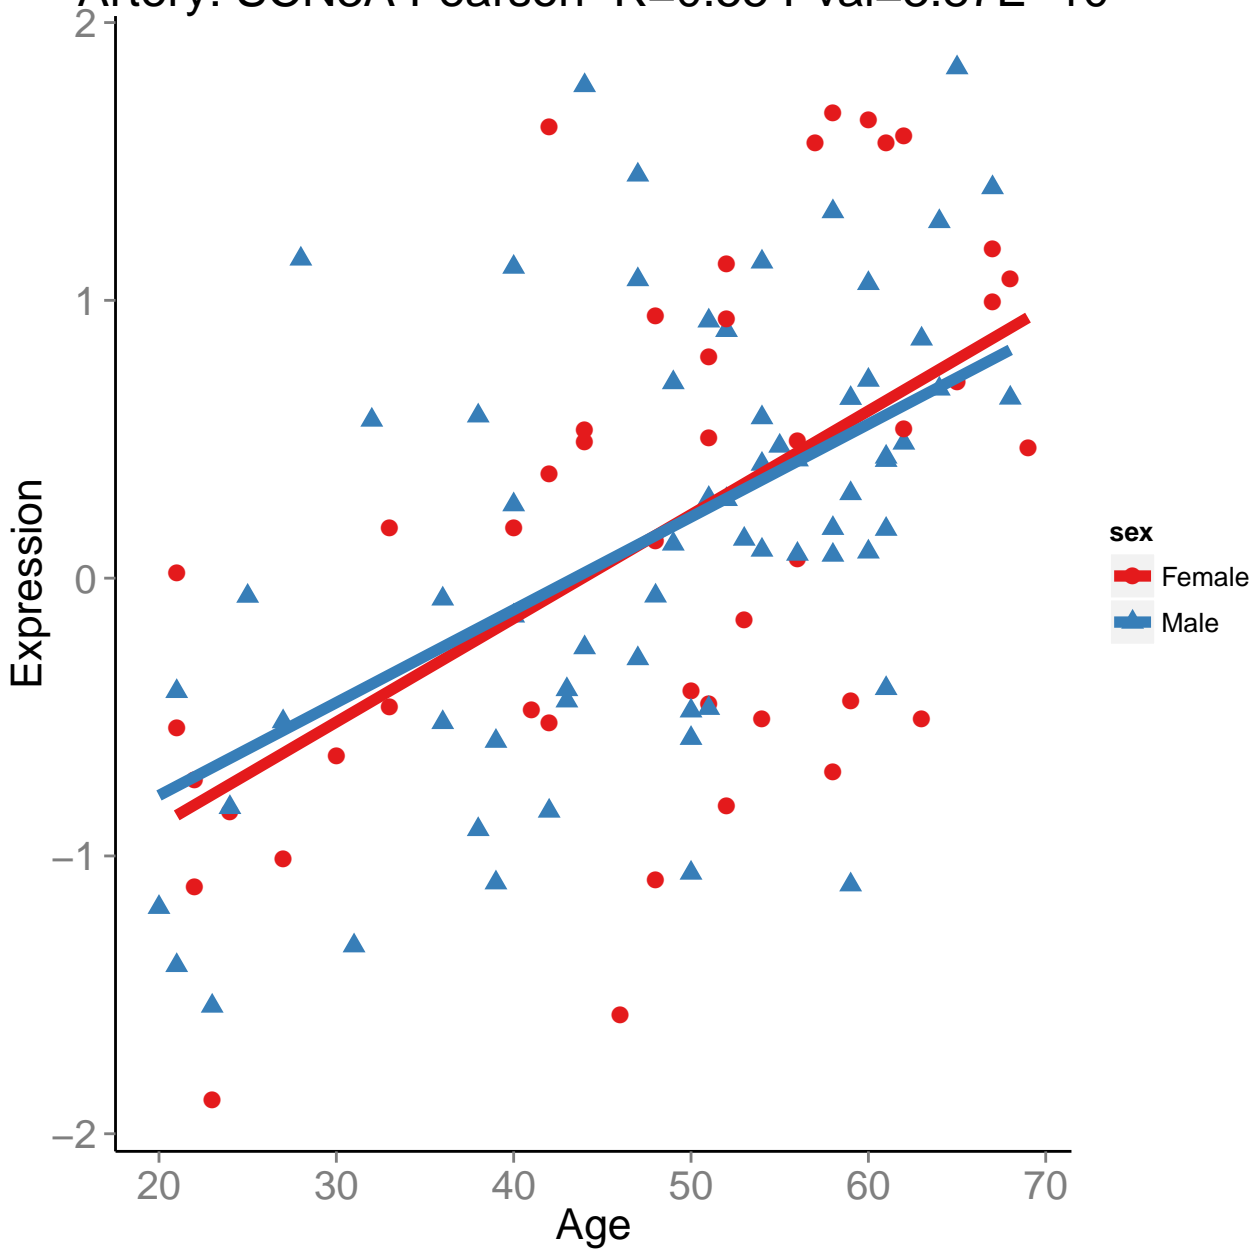

Artery: COL11A1 Pearson-R=0.55 Pval=3.77E-10

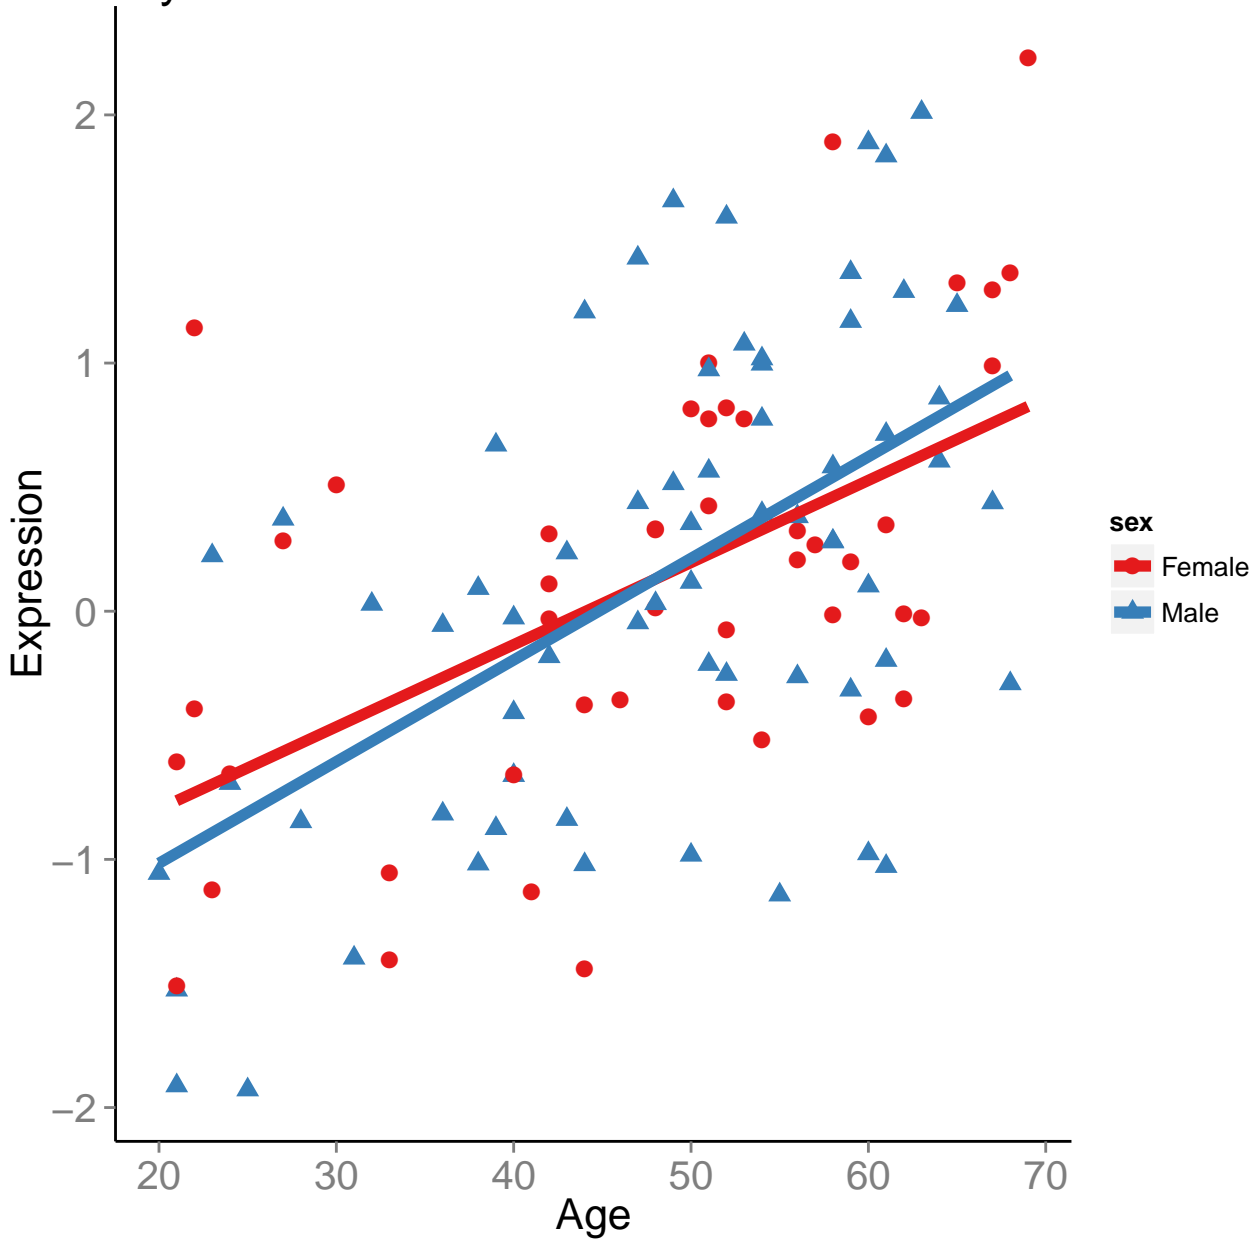

Artery: SH3D21 Pearson-R=0.55 Pval=3.42E-10

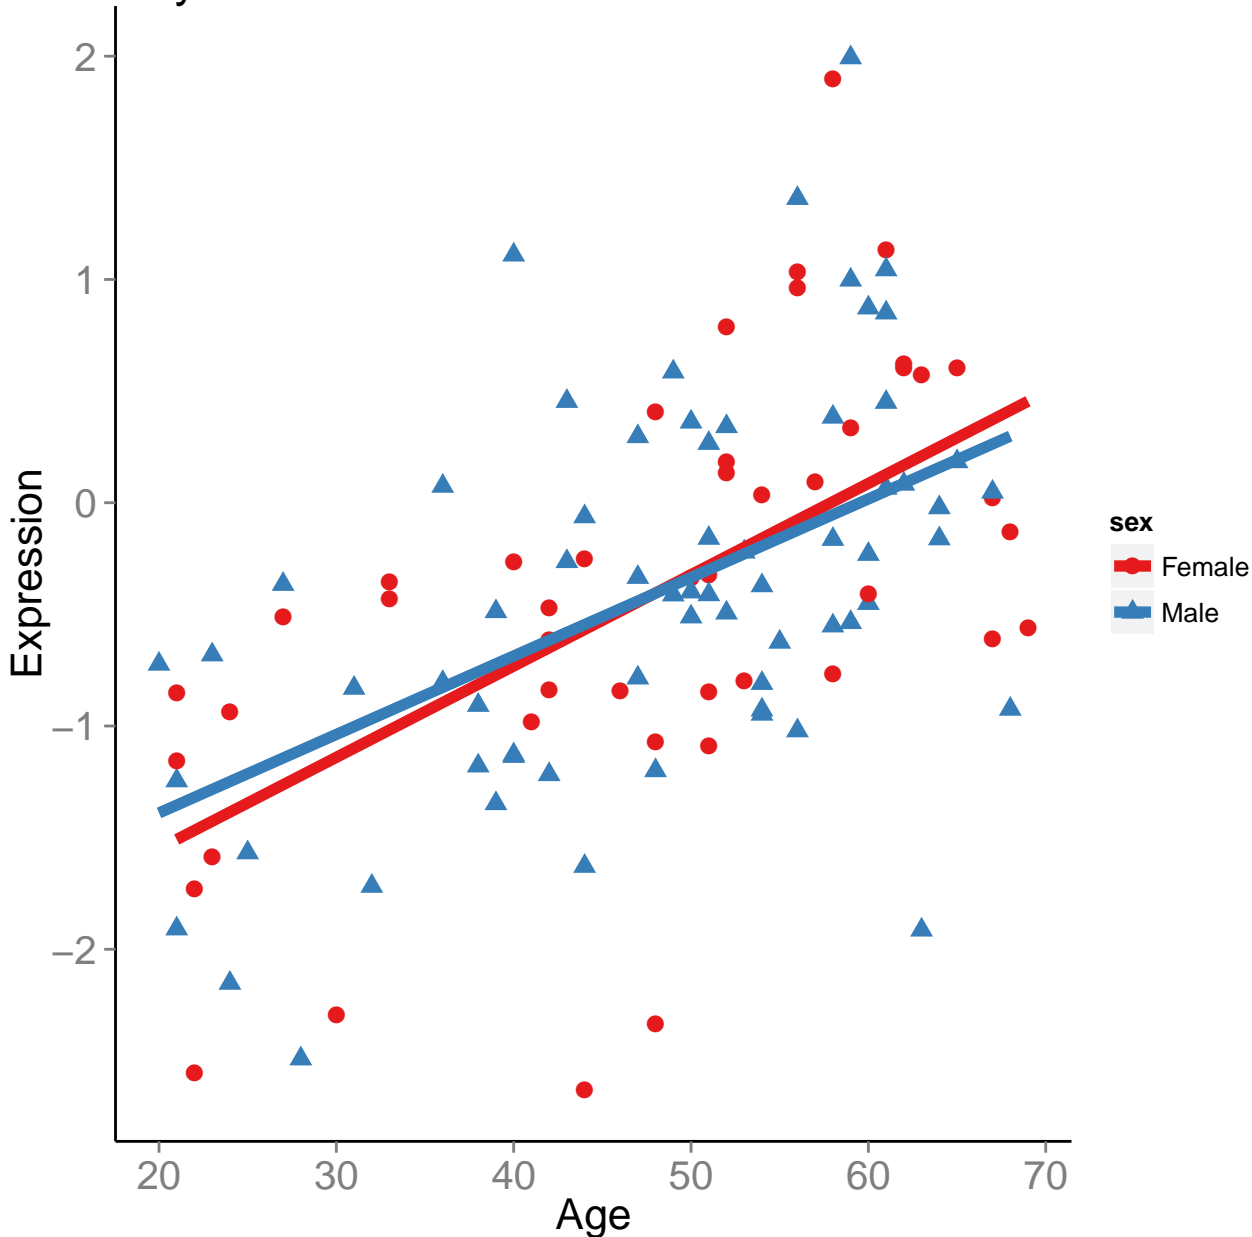

Artery: KRTCAP3 Pearson-R=0.54 Pval=5.45E-10

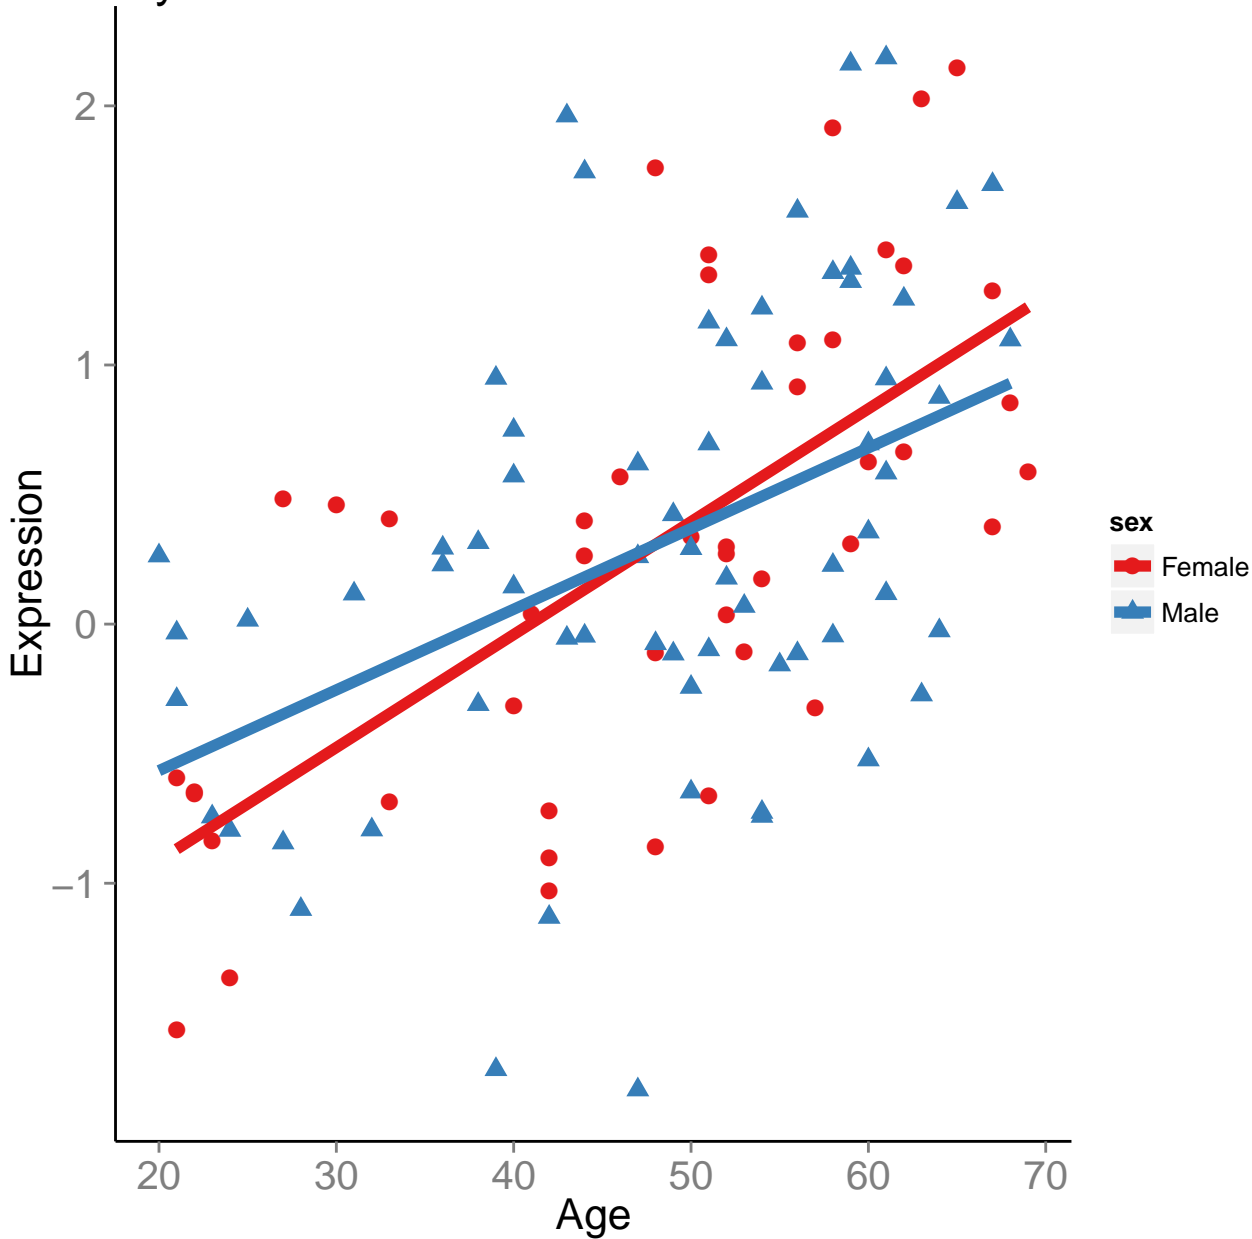

Artery: F2R Pearson-R=0.54 Pval=5.87E-10

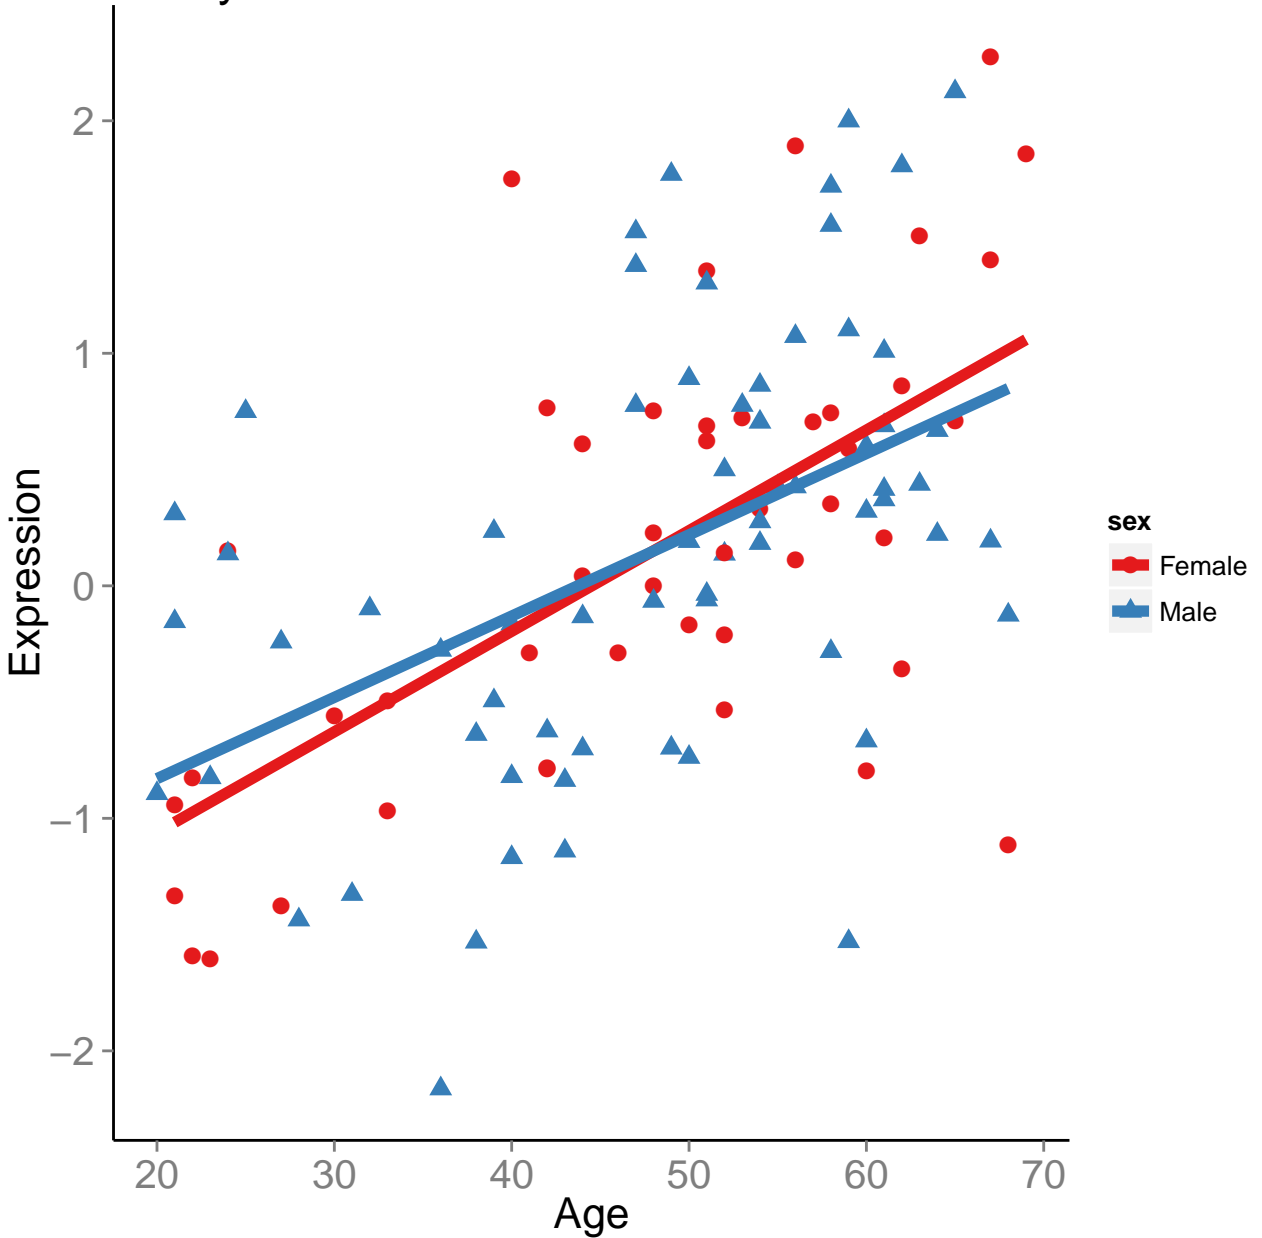

Artery: GPR173 Pearson-R=0.54 Pval=6.93E-10

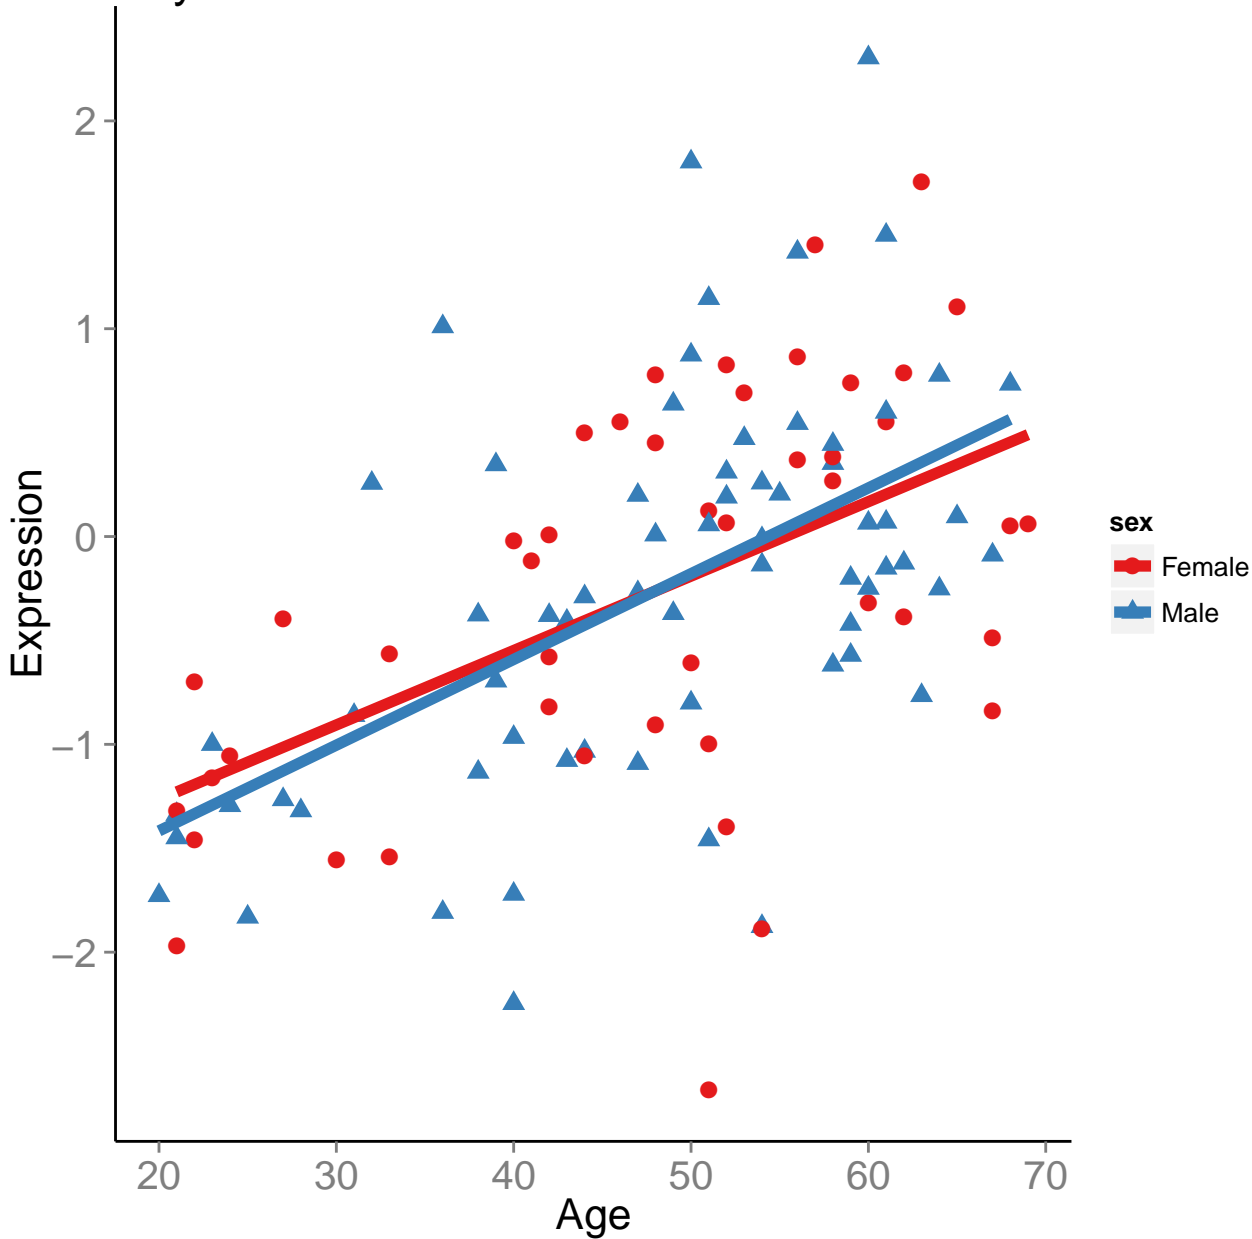

Artery: FCHSD1 Pearson-R=0.54 Pval=6.59E-10

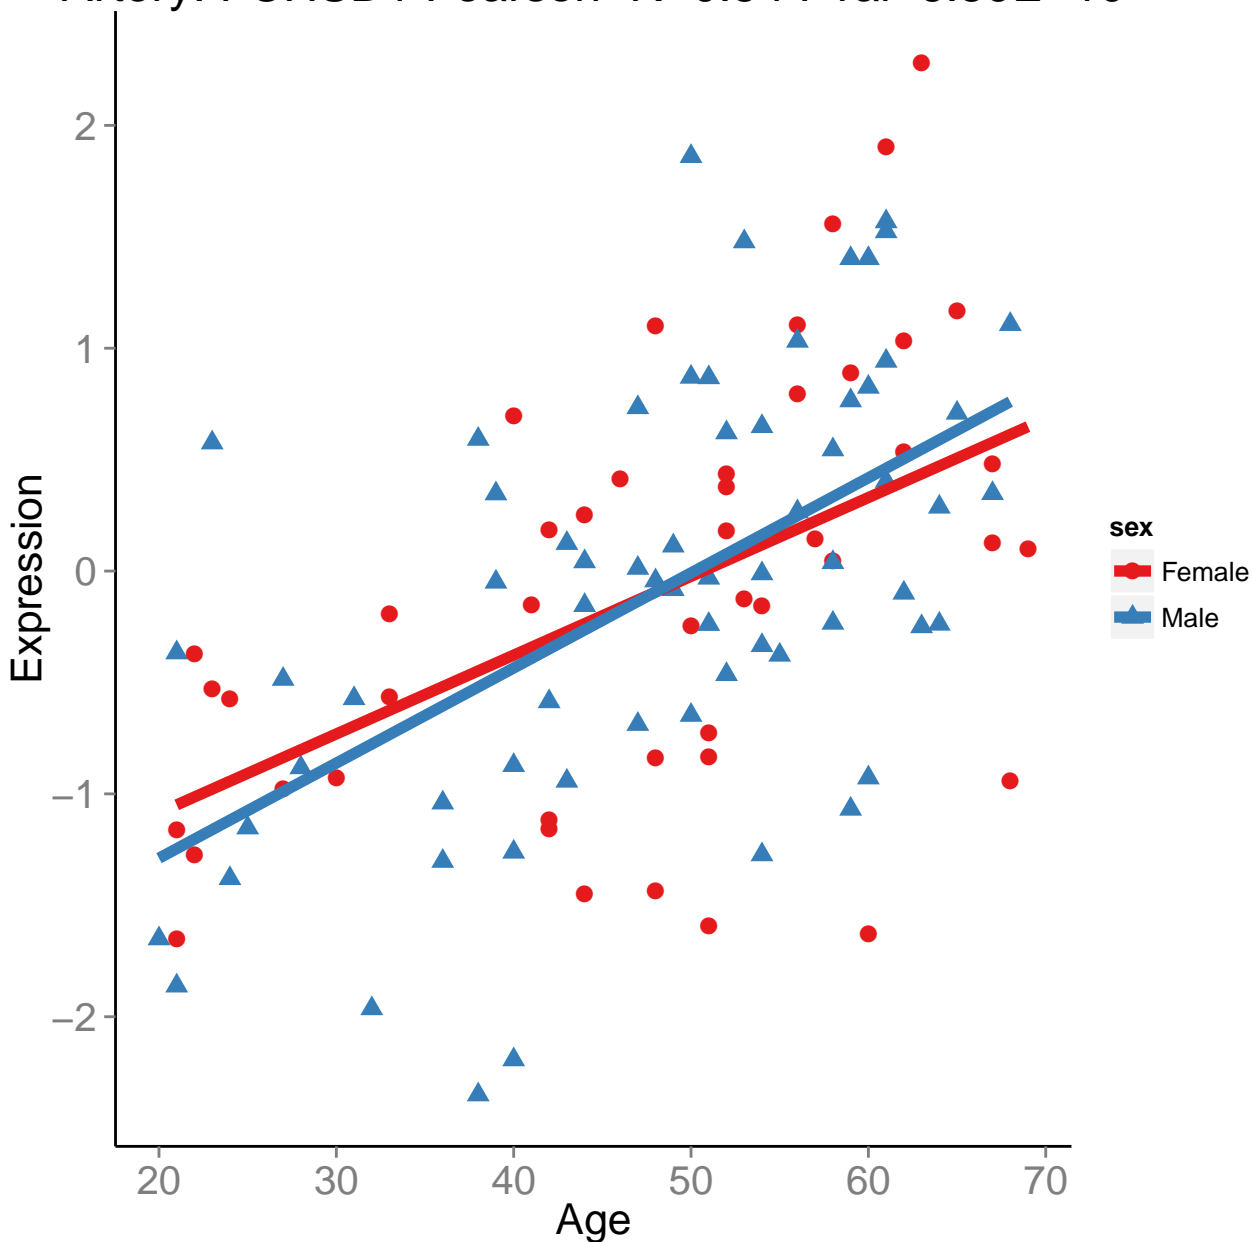



Artery: POU6F1 Pearson-R=0.54 Pval=7.87E-10

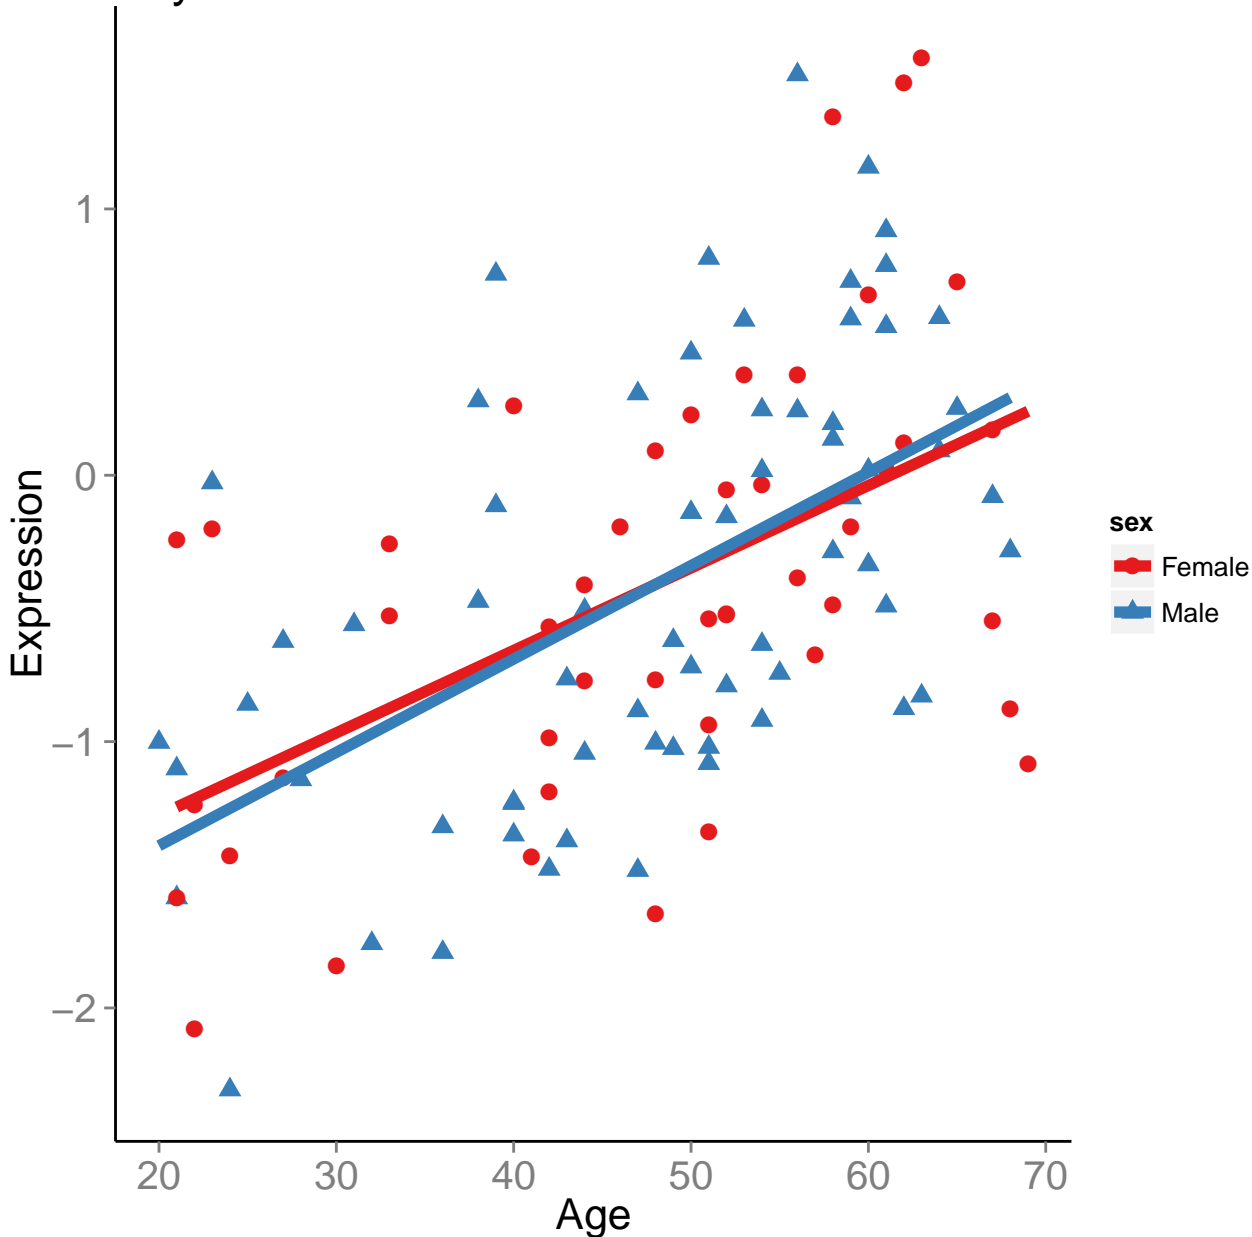

Artery: NDOR1 Pearson-R=0.54 Pval=1.12E-09

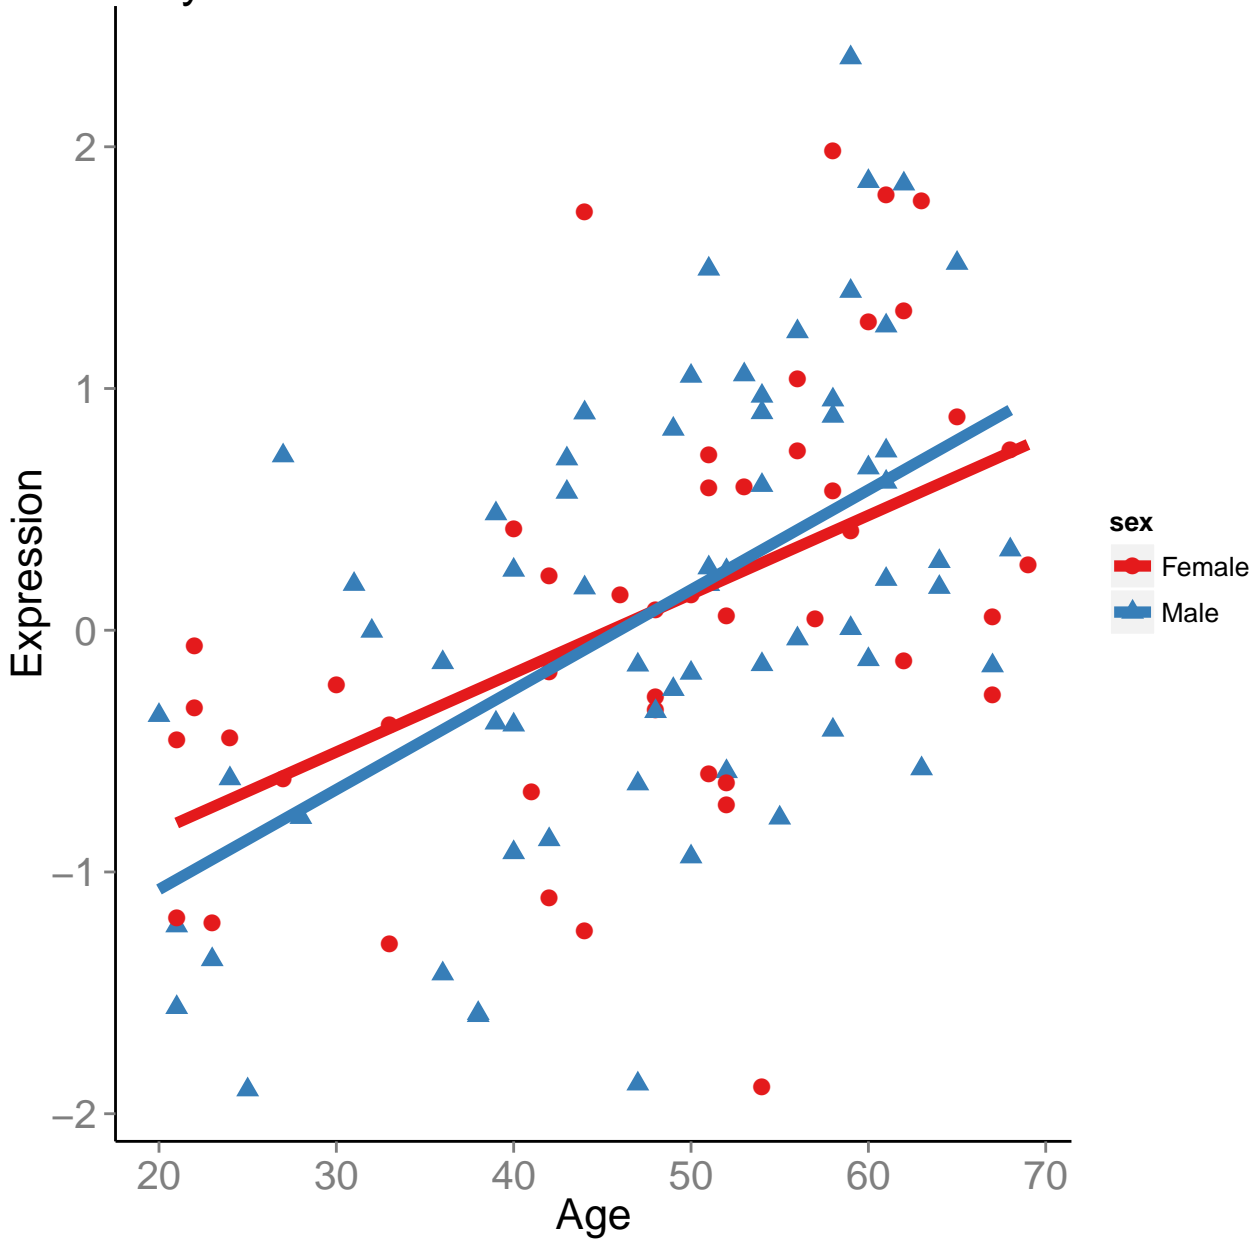

Artery: CCNL2 Pearson-R=0.54 Pval=1.16E-09

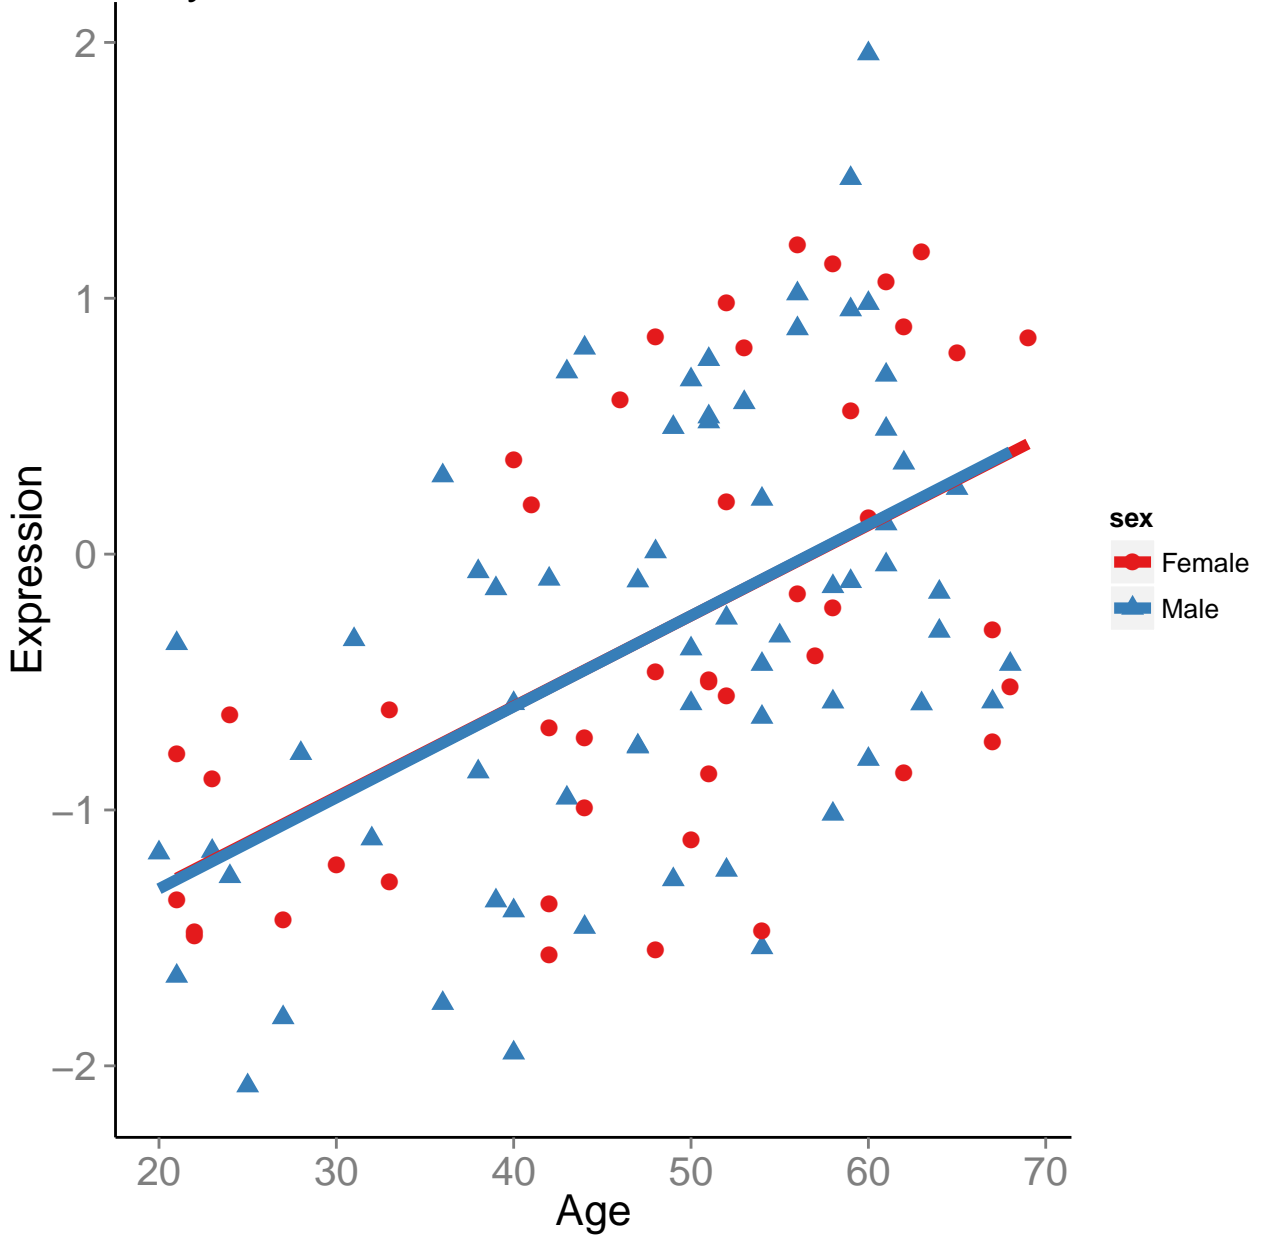

Artery: LMO3 Pearson-R=0.53 Pval=2.03E-09

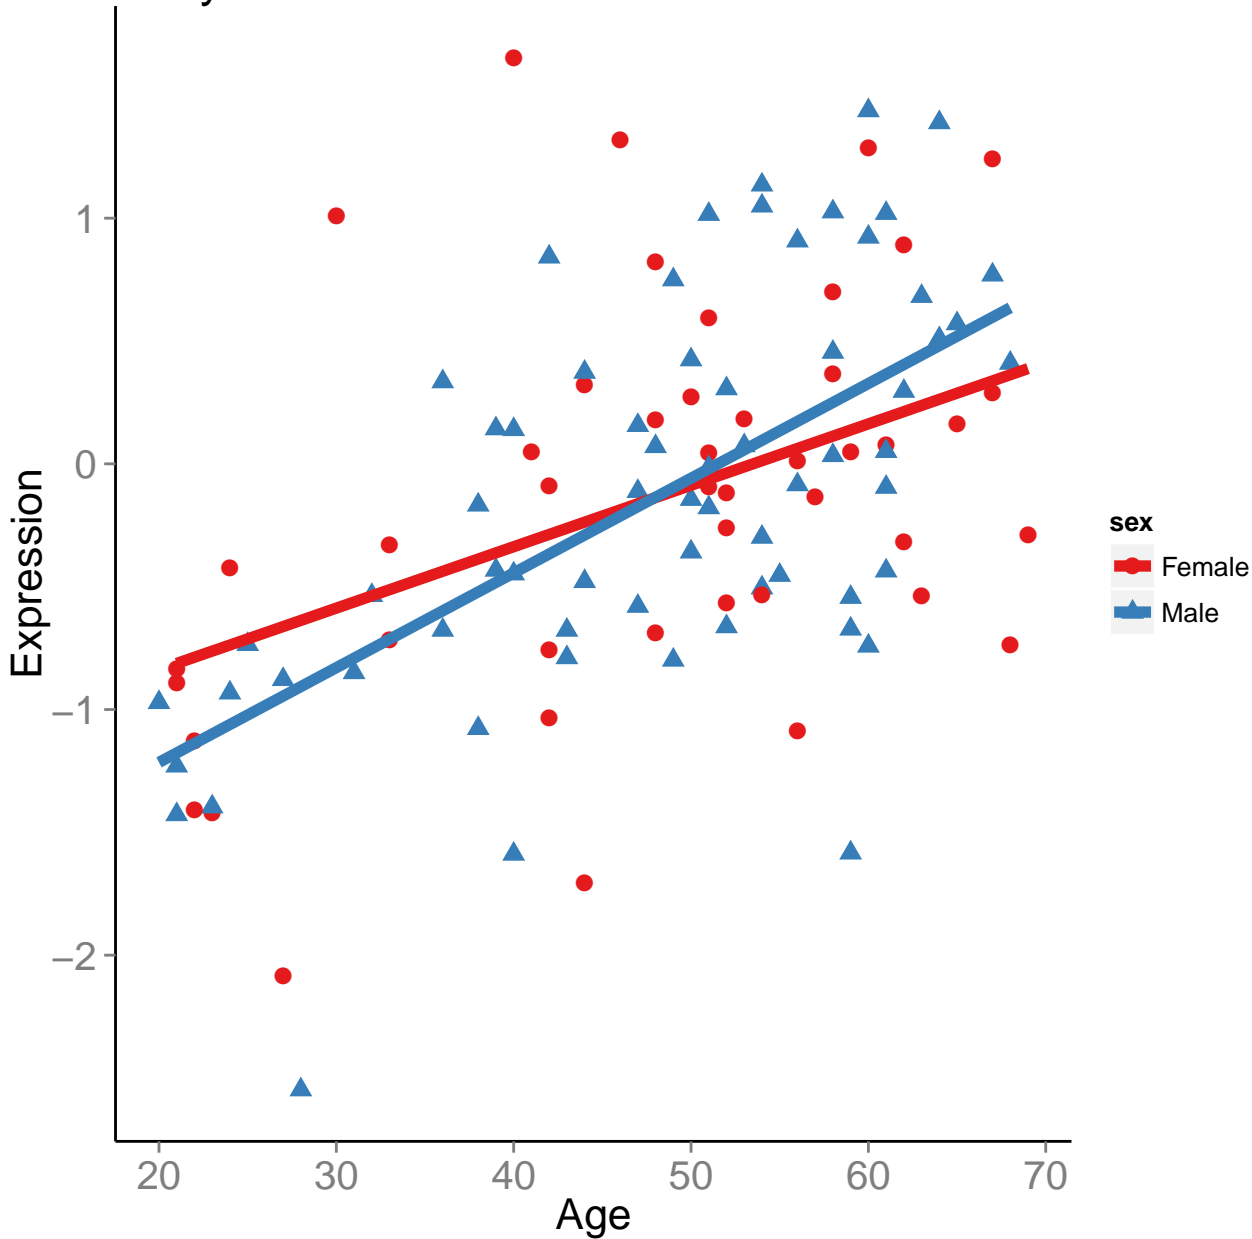

Artery: GRIA1 Pearson-R=0.53 Pval=1.93E-09

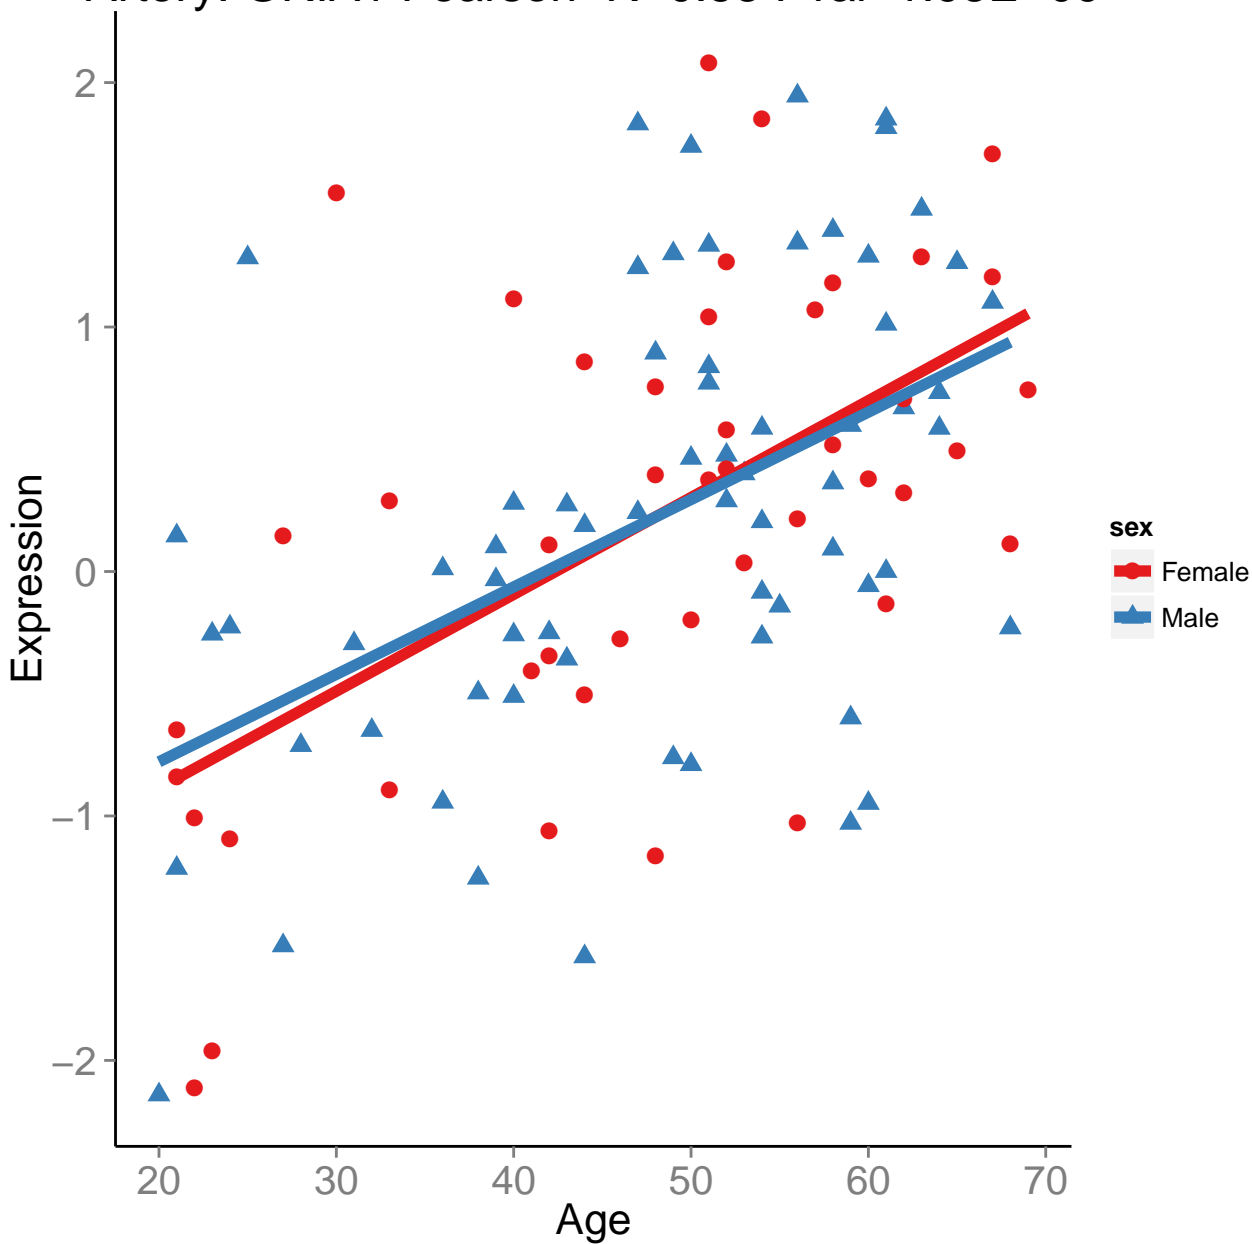

Artery: LMF2 Pearson-R=0.53 Pval=1.89E-09

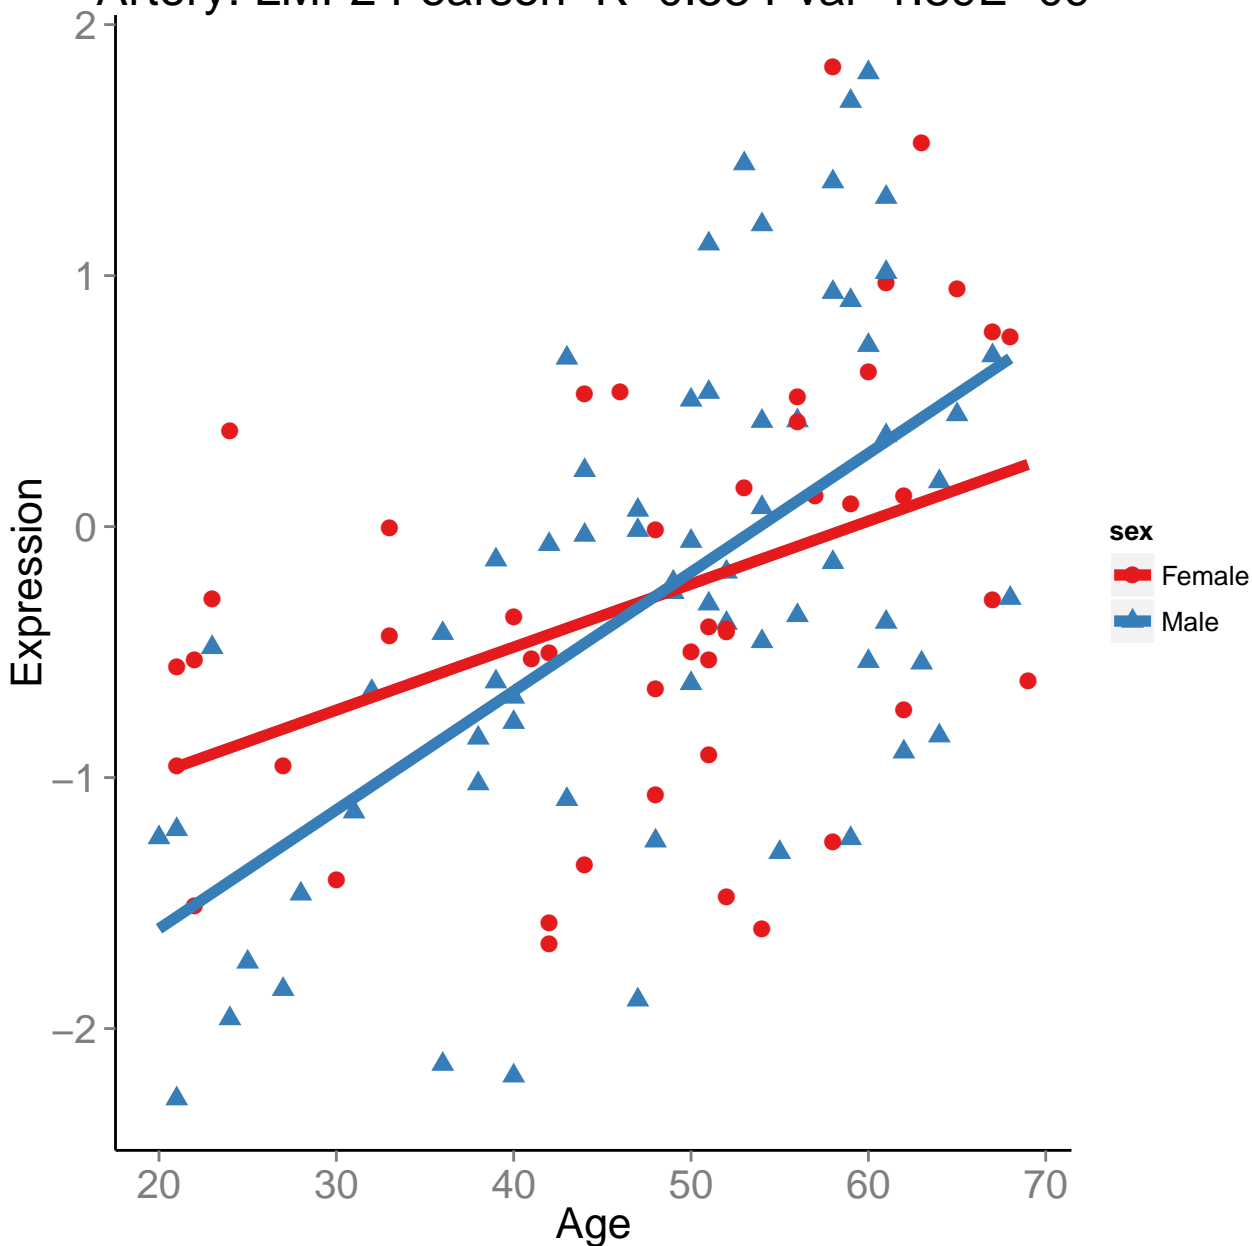

Artery: AC103810.2 Pearson-R=0.53 Pval=1.69E-09

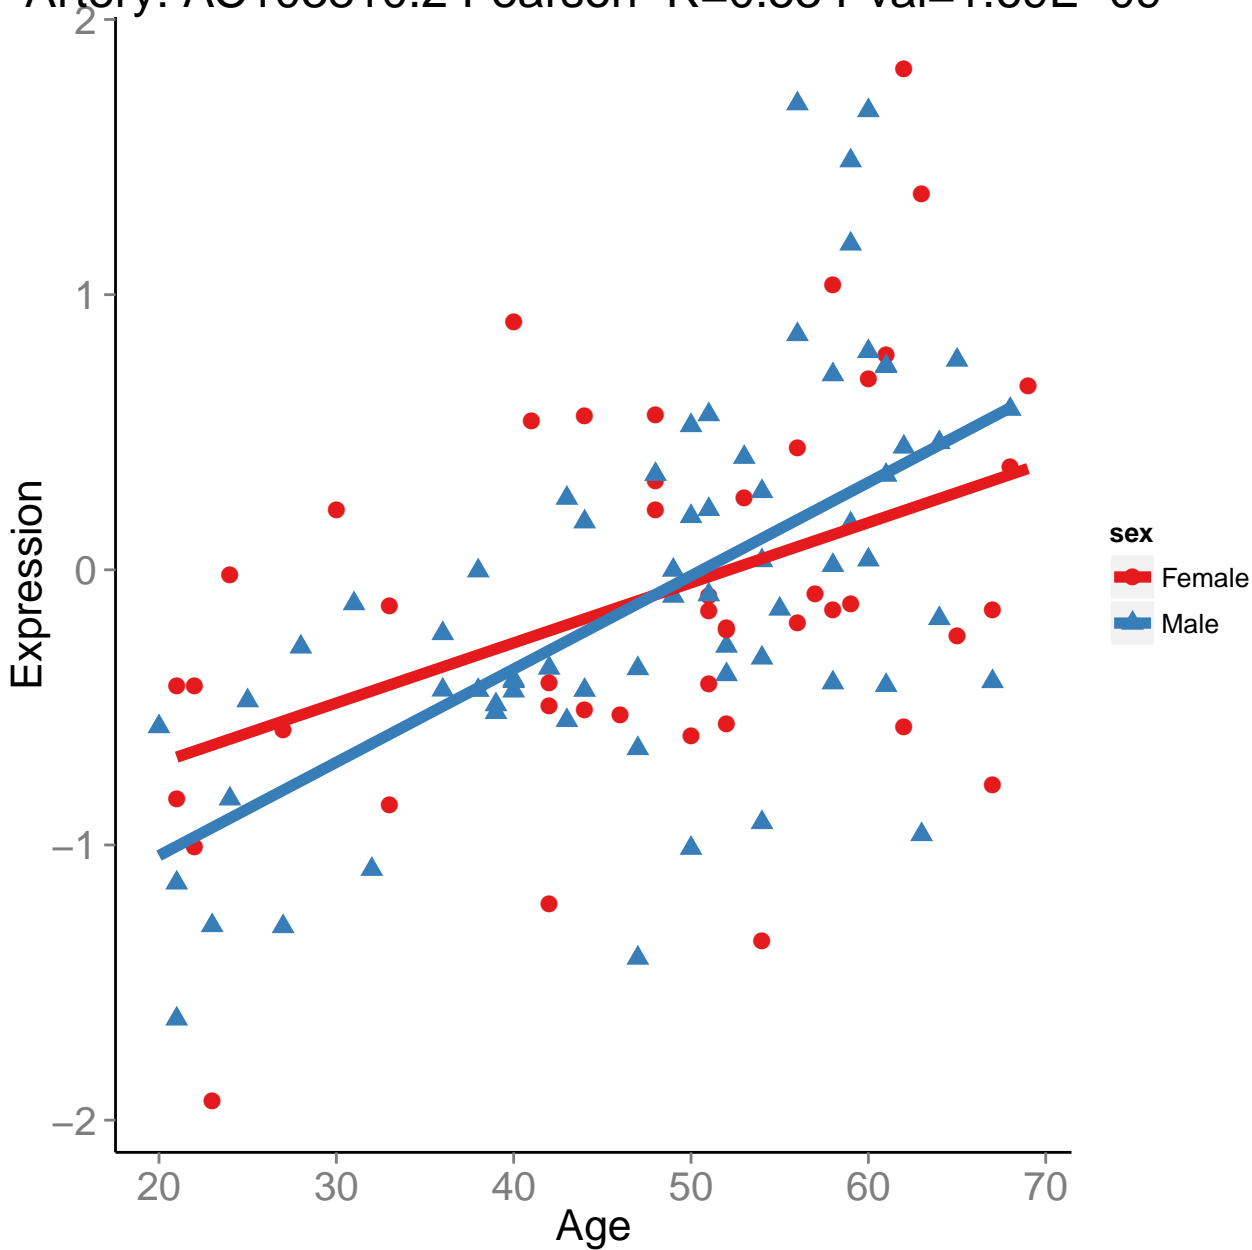

Artery: KIAA1598 Pearson-R=0.53 Pval=1.88E-09

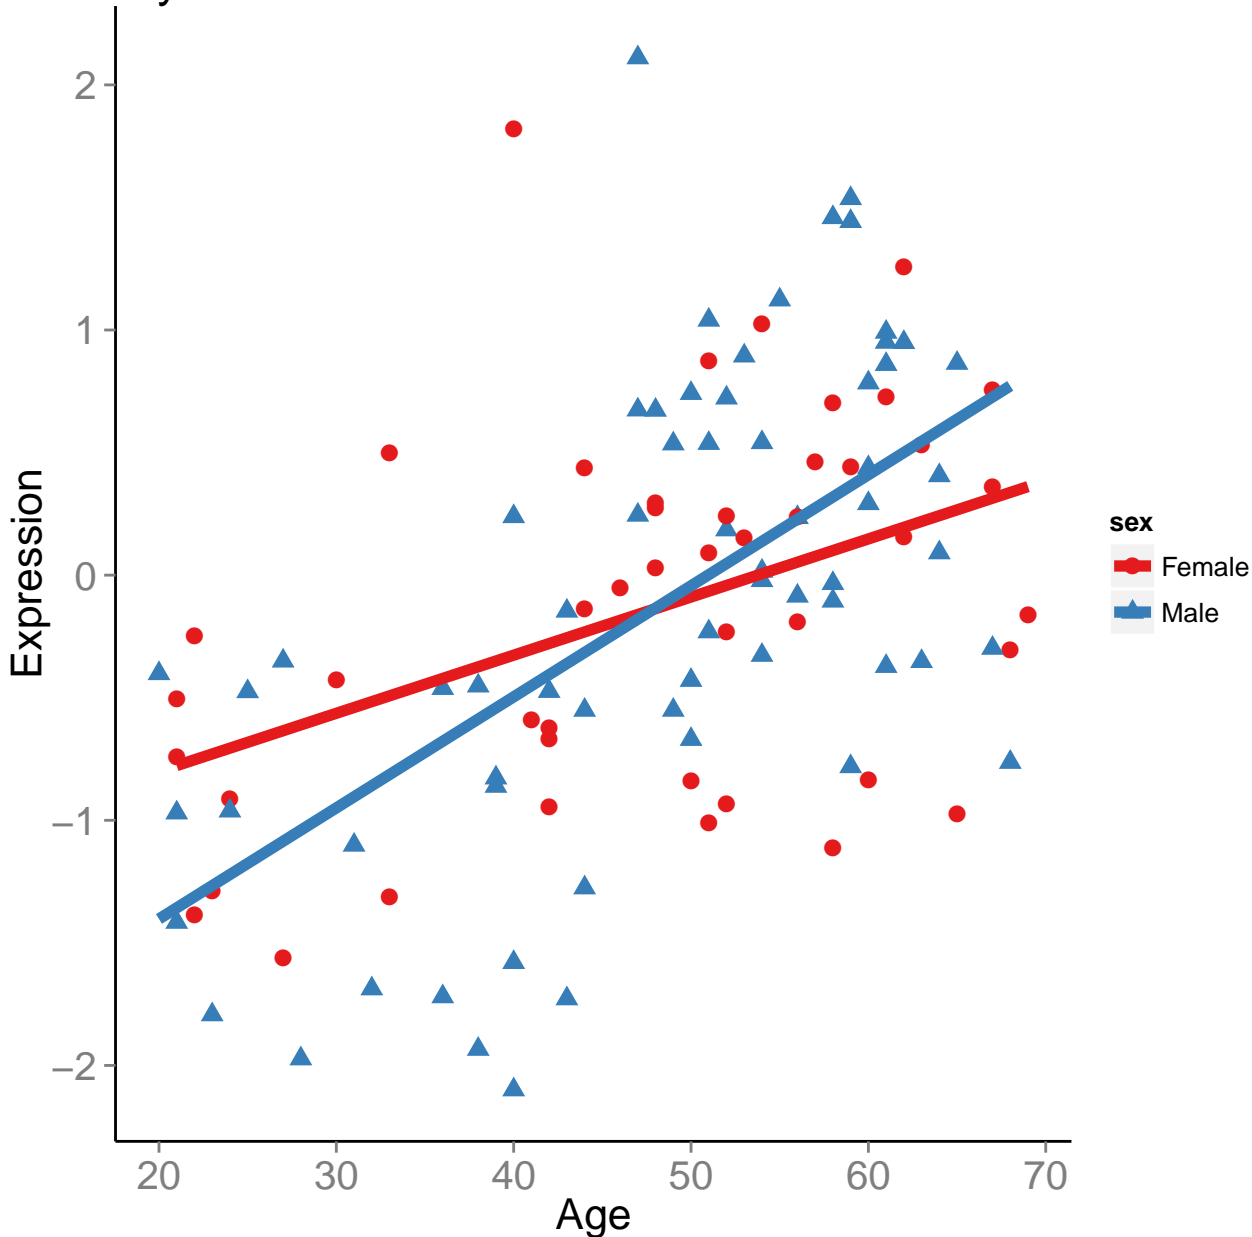



Artery: RP4-635E18.7 Pearson-R=0.53 Pval=1.70E-09

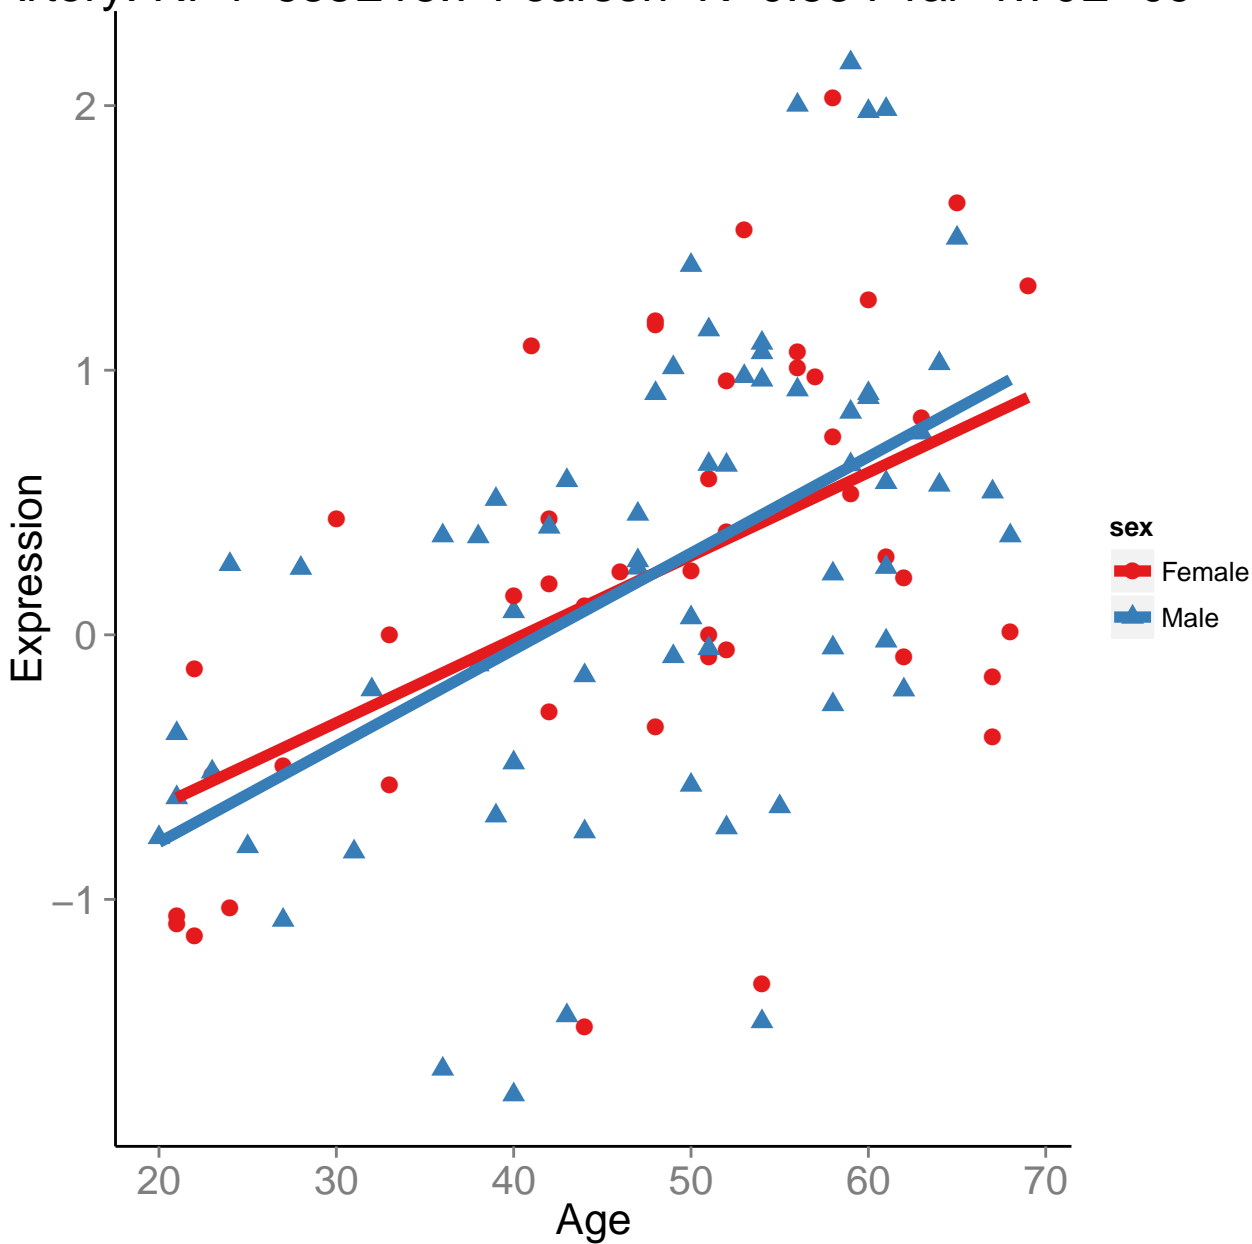

Artery: PPP1R13L Pearson-R=0.53 Pval=2.03E-09

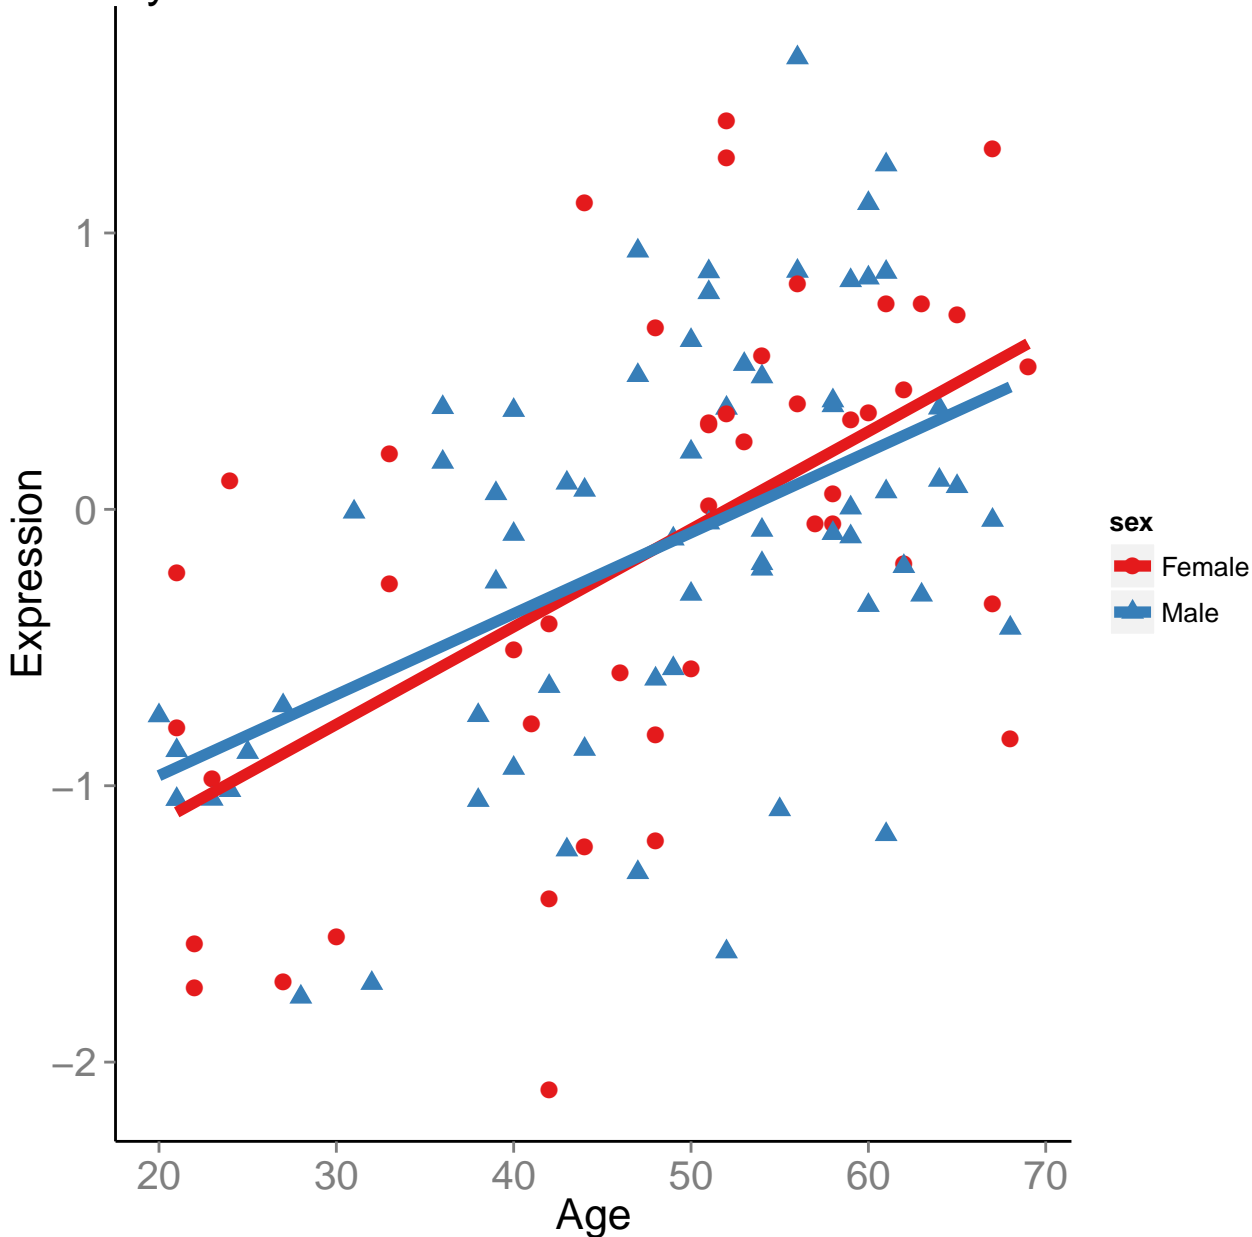

Artery: CDK9 Pearson-R=0.53 Pval=1.92E-09

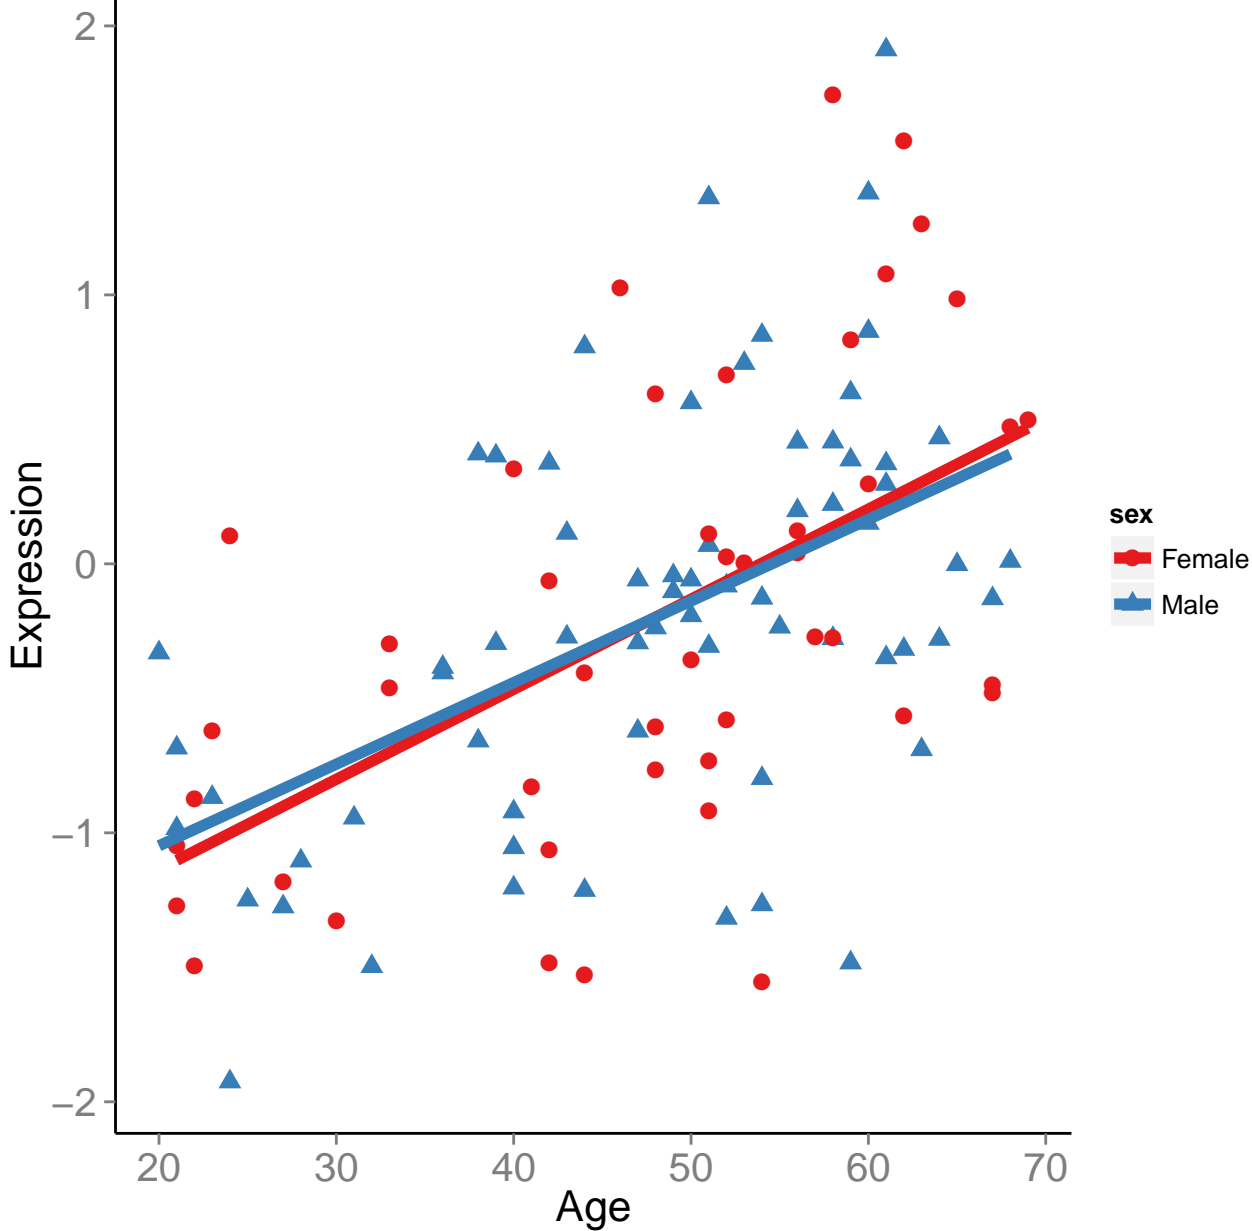

Artery: EPS8L2 Pearson-R=0.53 Pval=2.15E-09

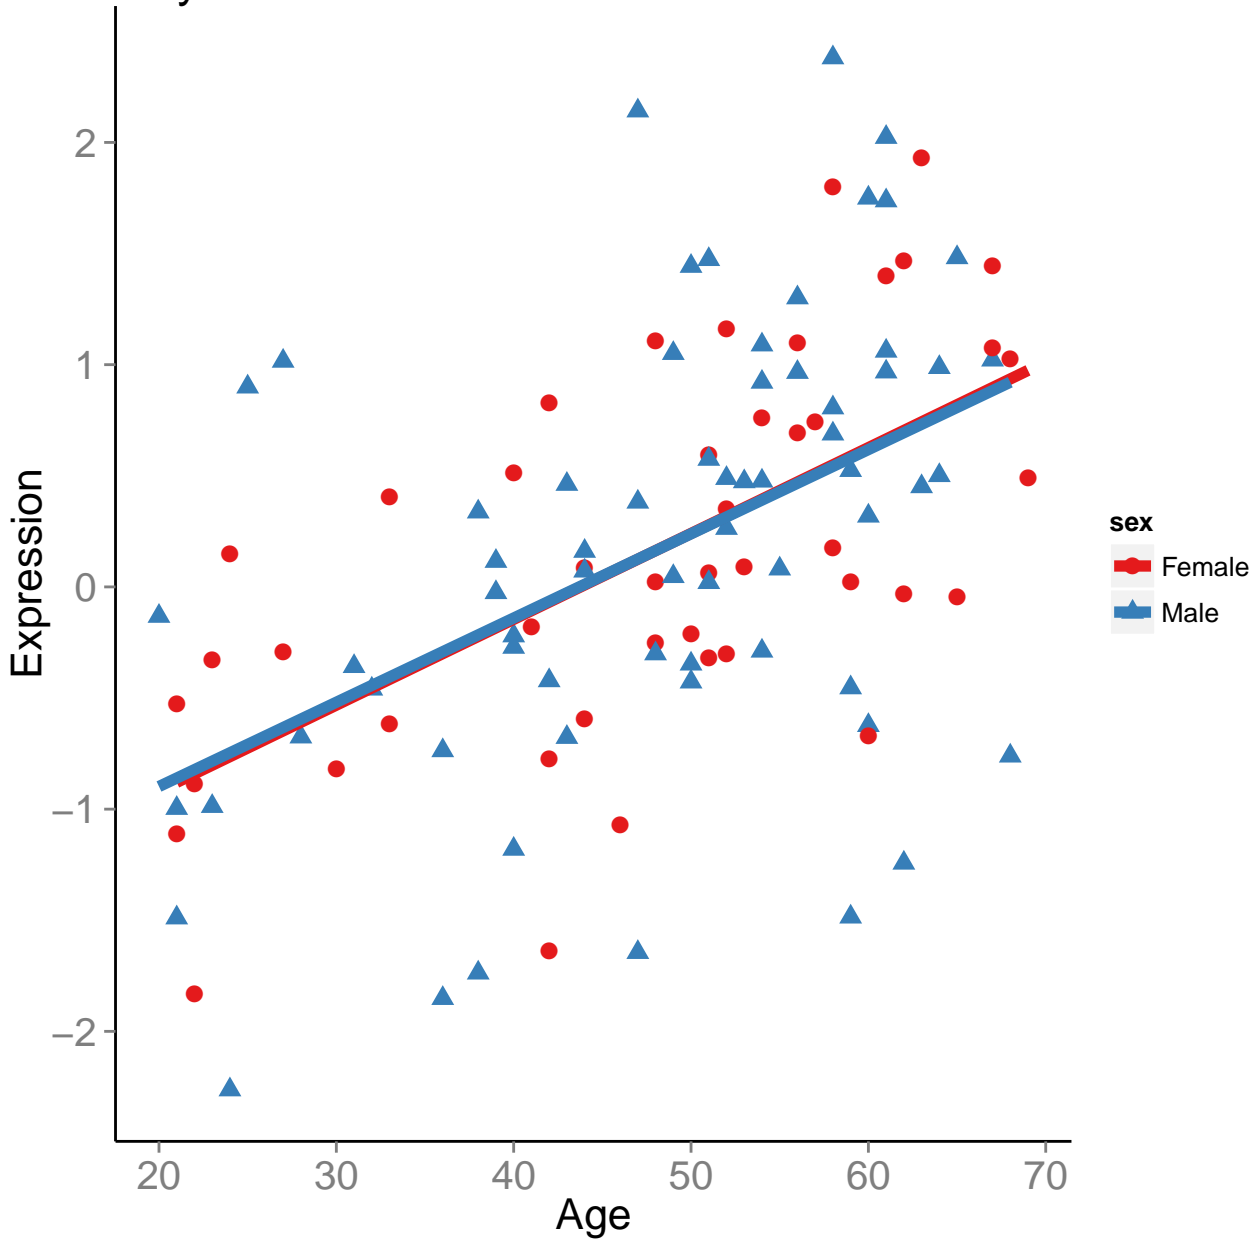

Artery: ITGB7 Pearson-R=0.53 Pval=2.53E-09

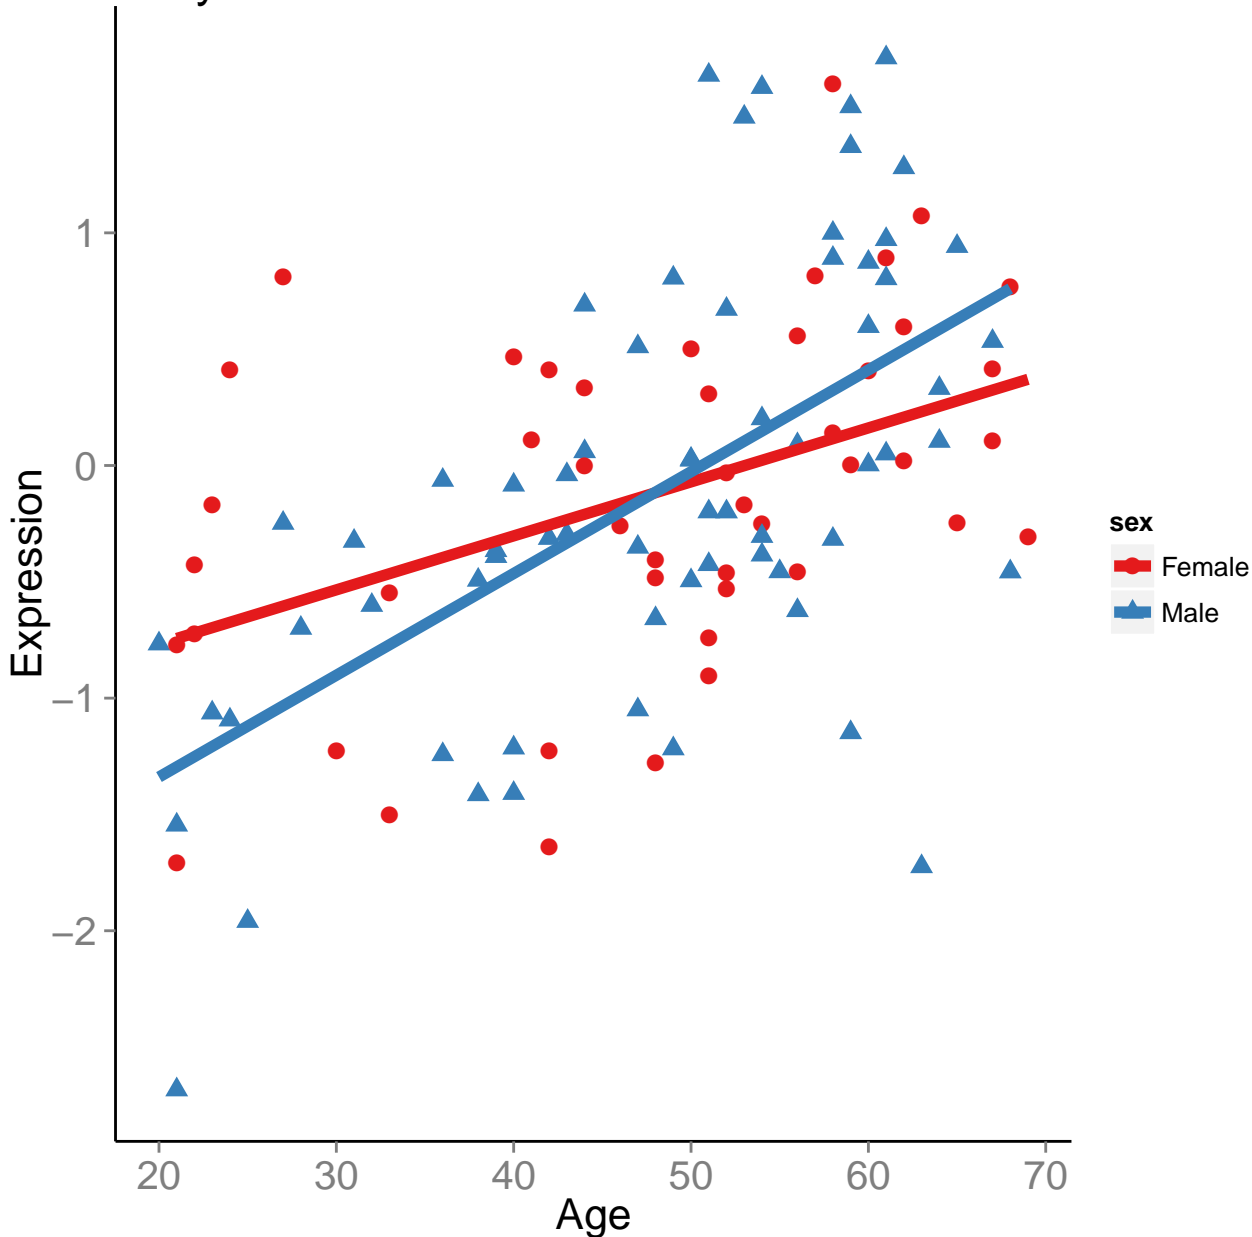

Artery: CILP2 Pearson-R=0.52 Pval=2.86E-09

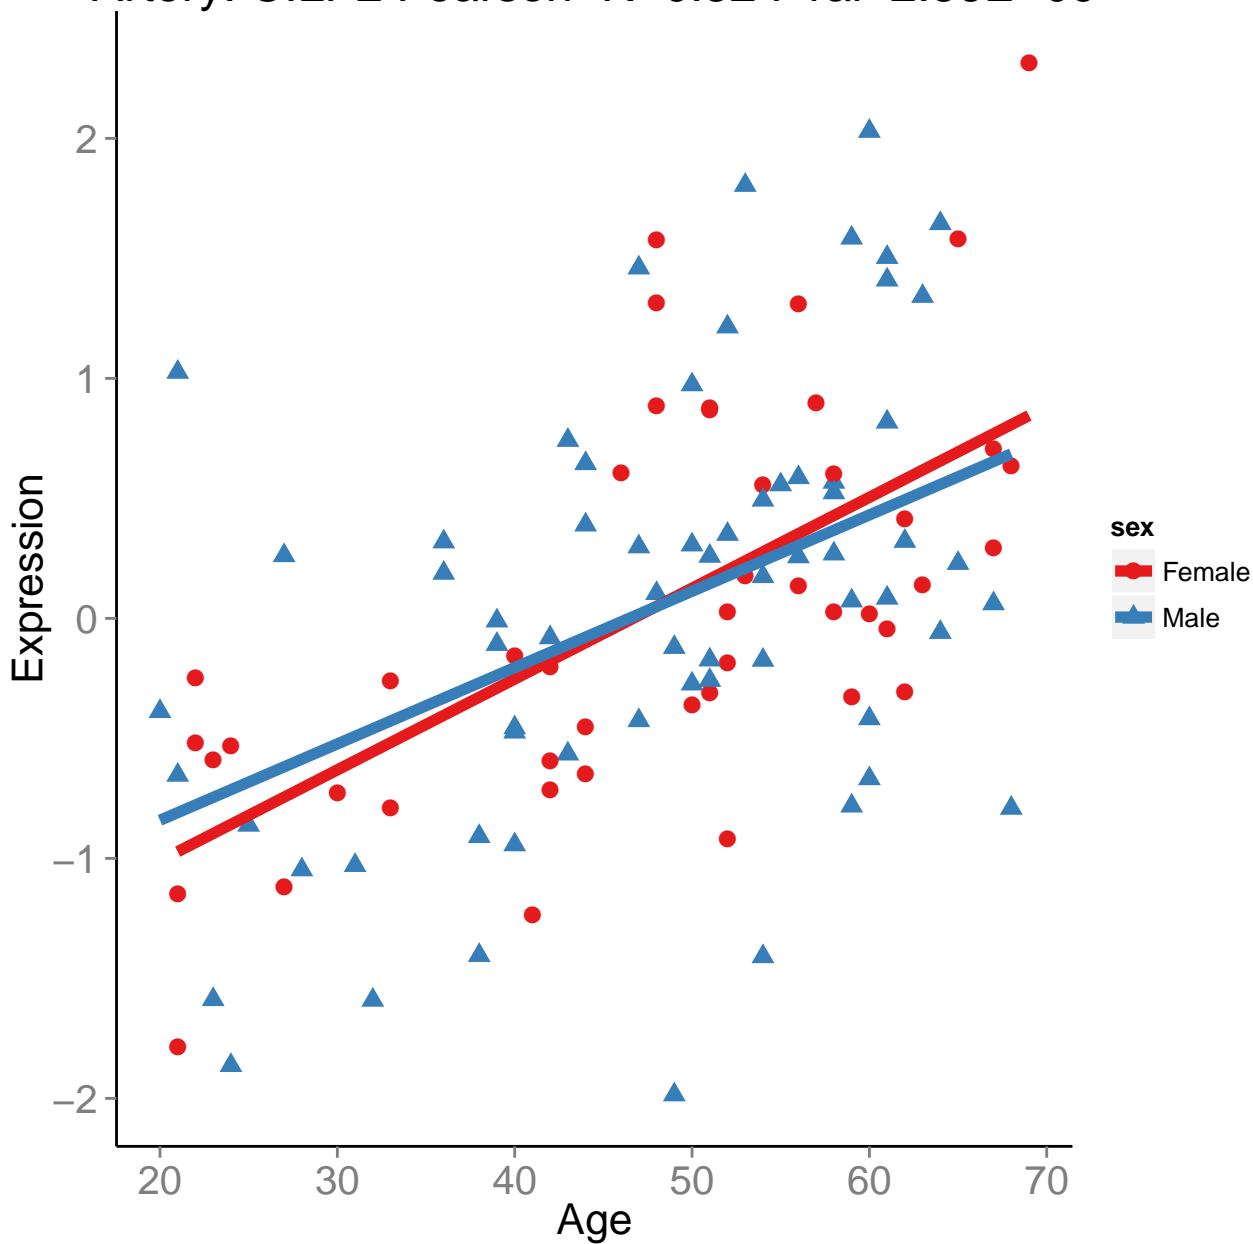

Artery: CXCR4 Pearson-R=0.52 Pval=3.01E-09

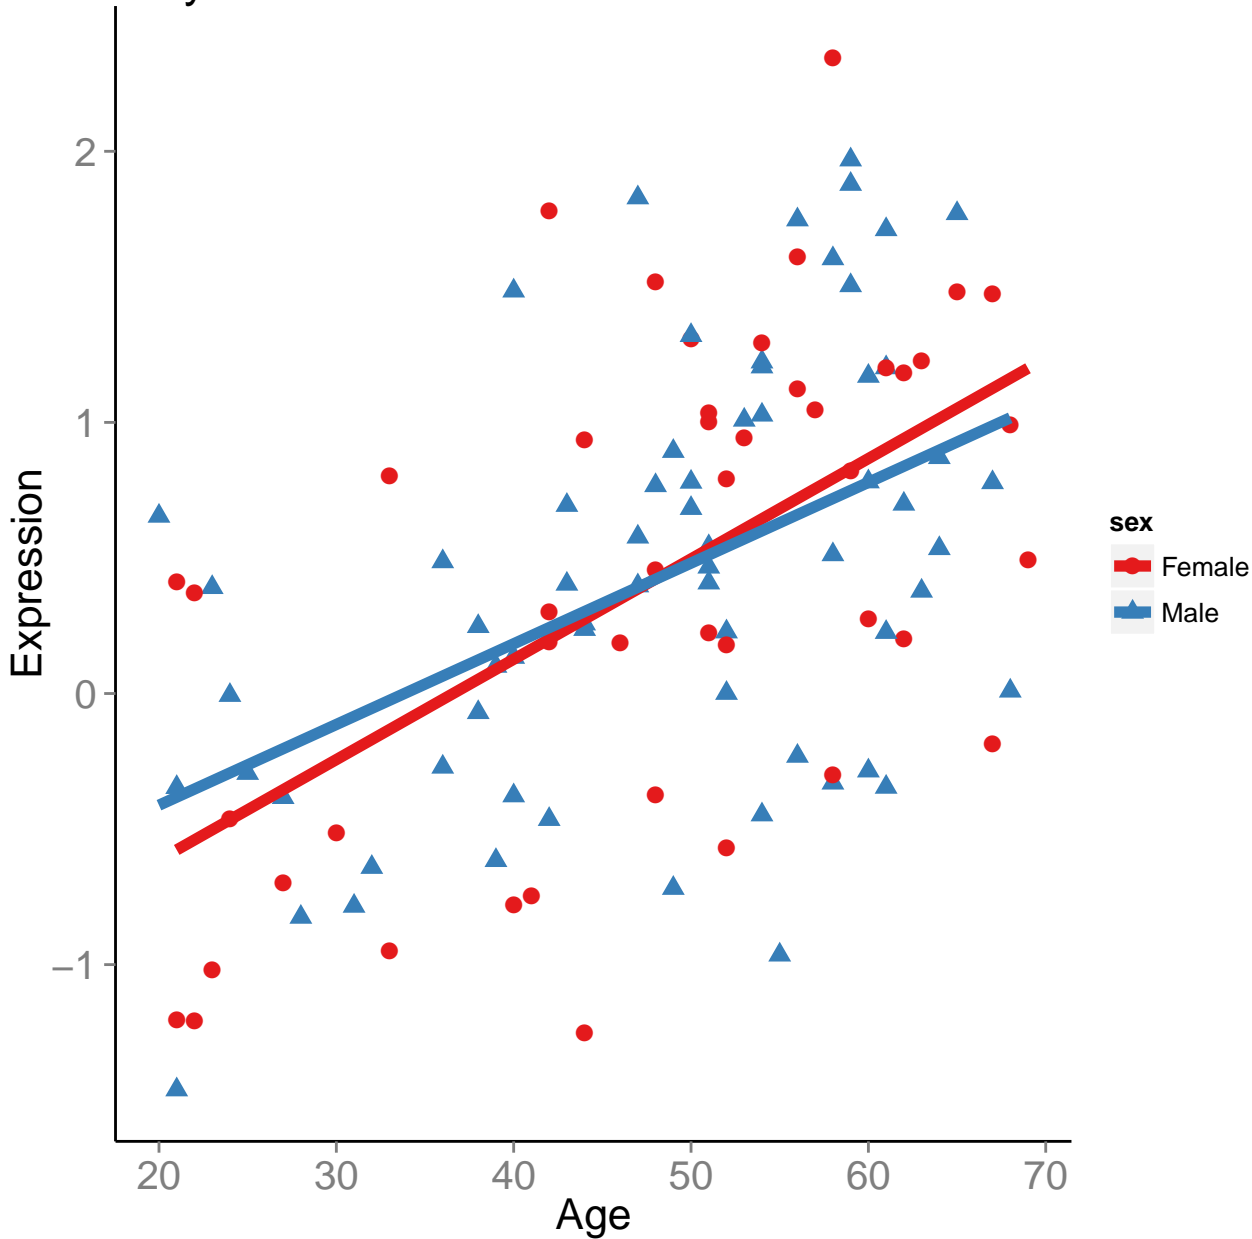

Artery: CCL5 Pearson-R=0.52 Pval=3.39E-09

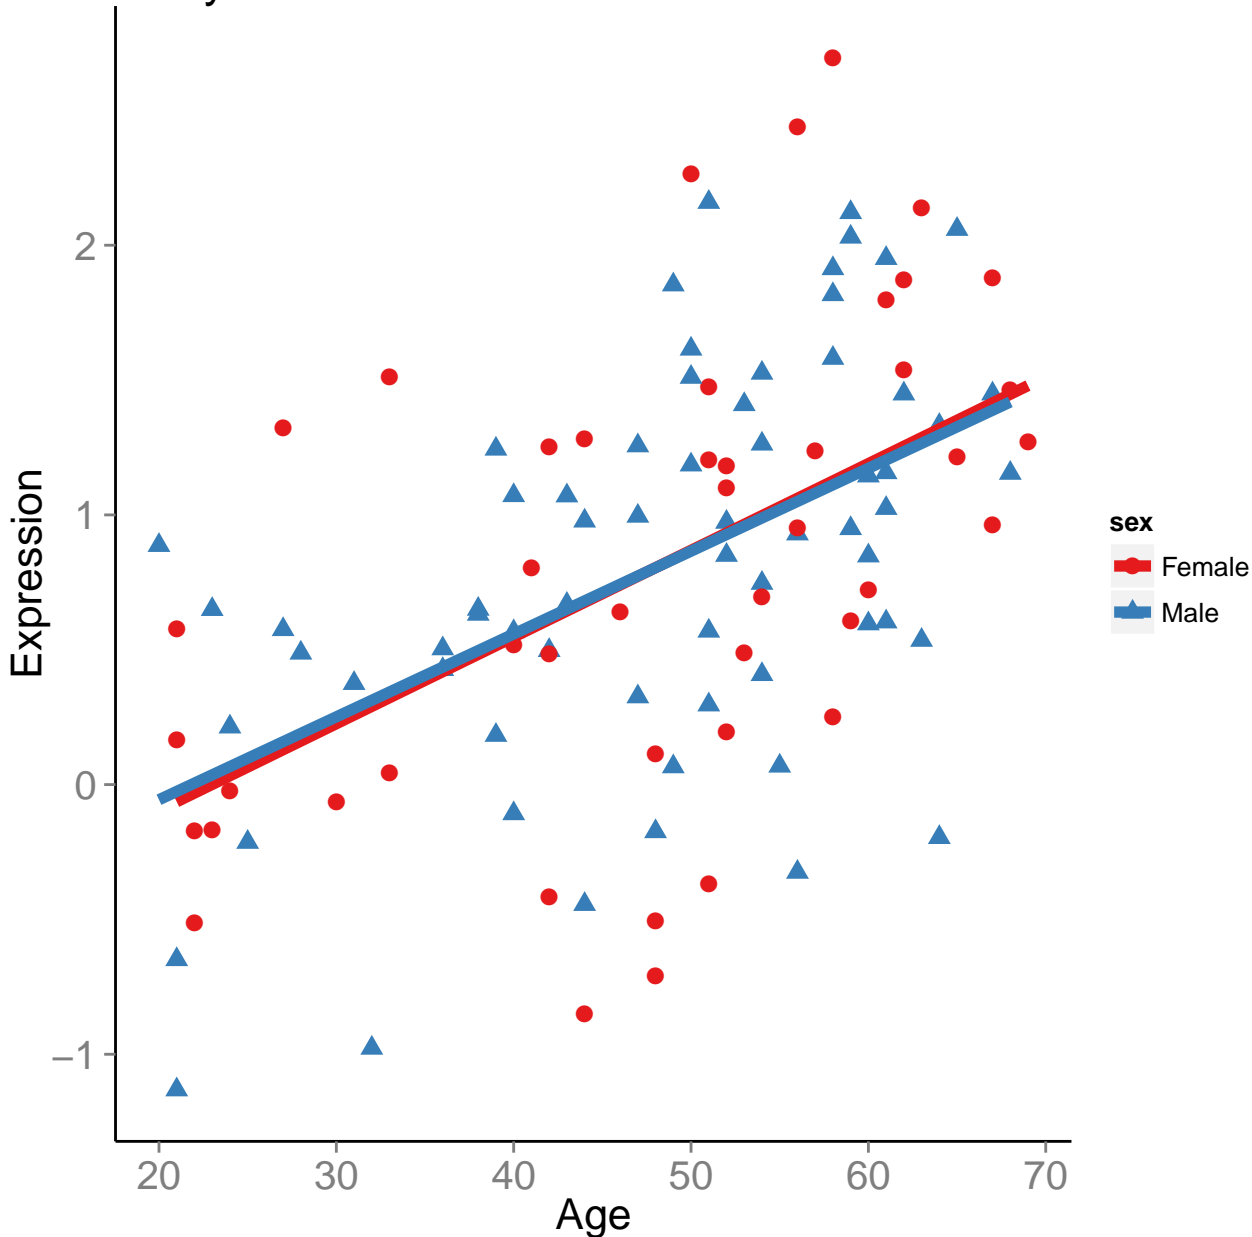



Artery: MAPK8IP3 Pearson-R=0.52 Pval=3.40E-09

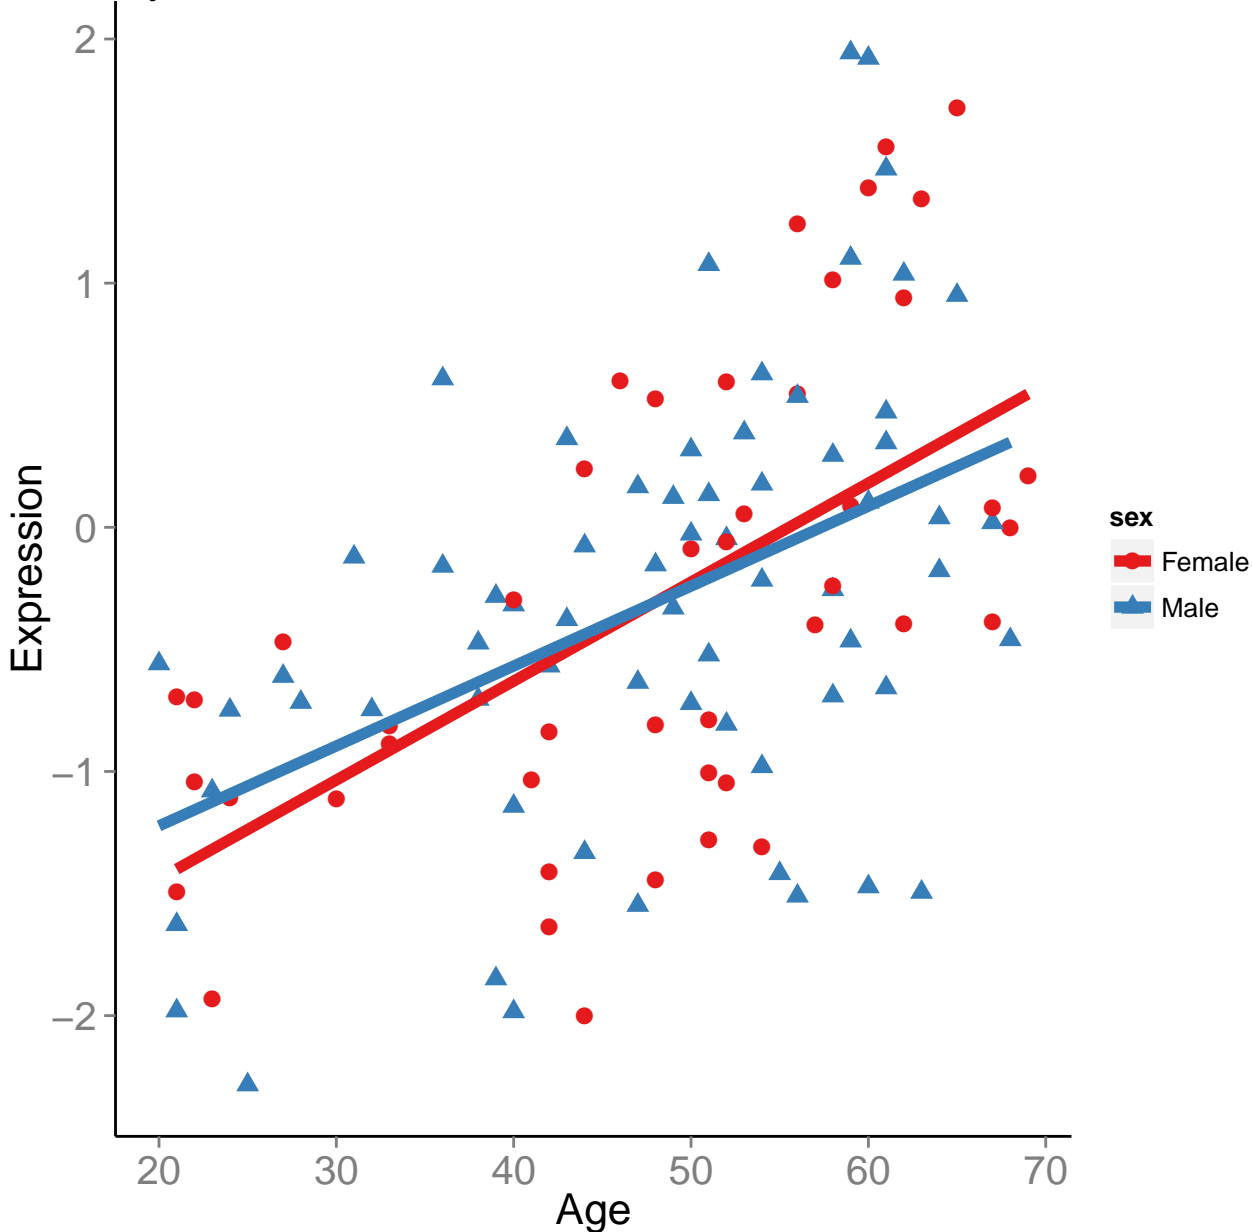

Artery: P2RY8 Pearson-R=0.52 Pval=3.60E-09

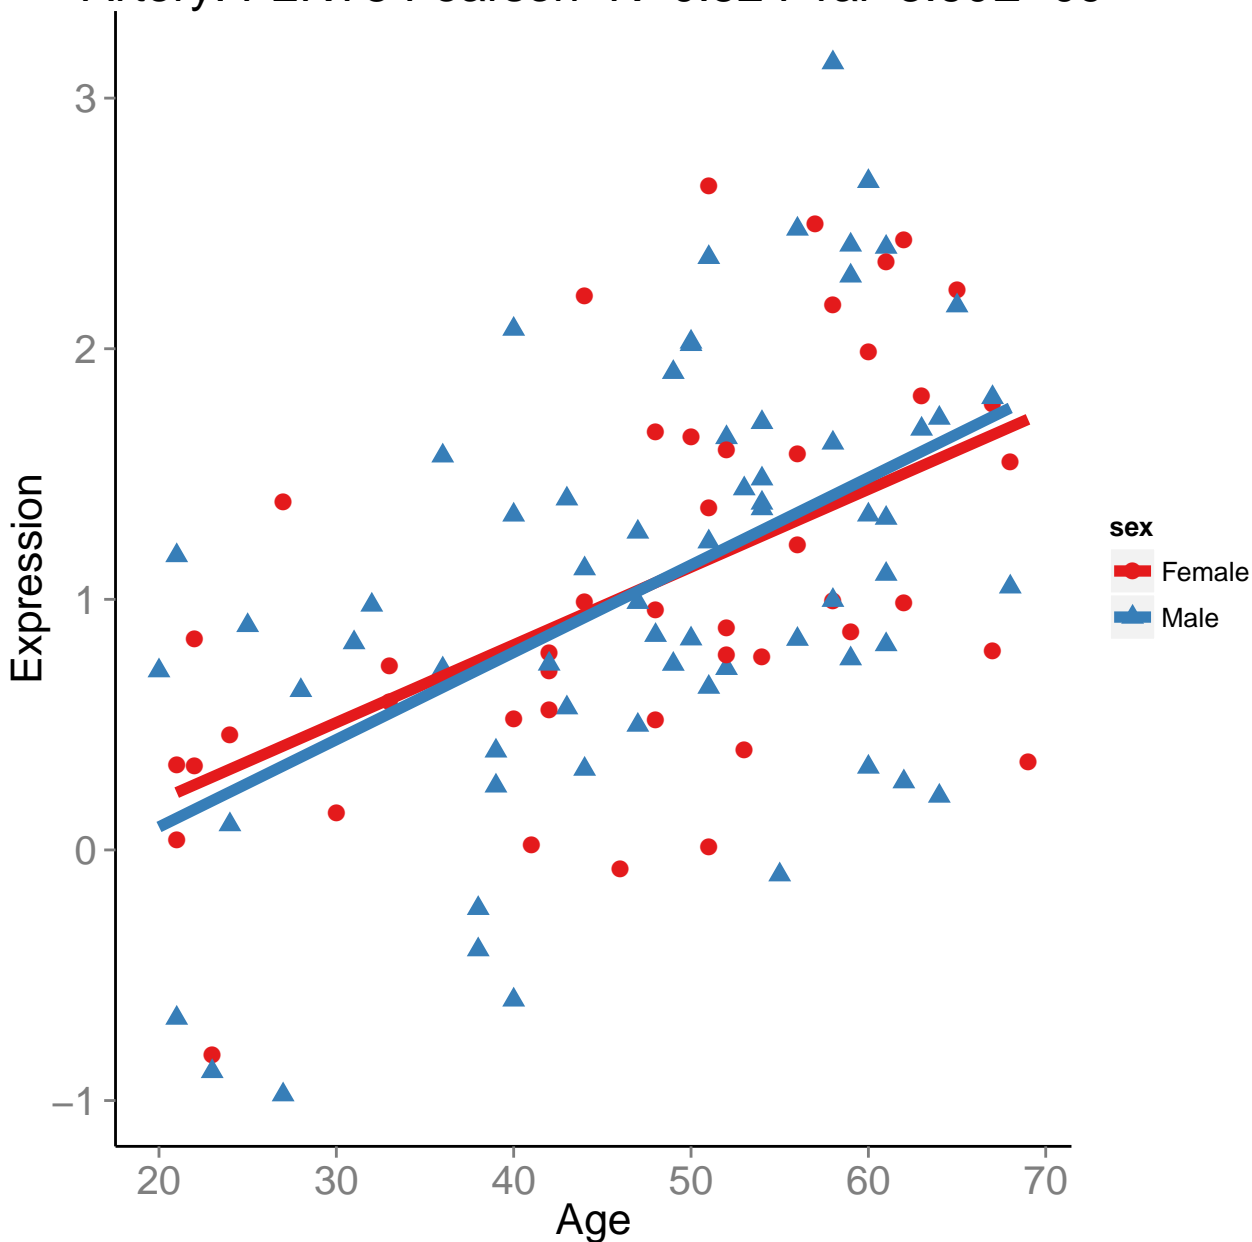

Artery: ZMAT3 Pearson-R=0.52 Pval=4.61E-09

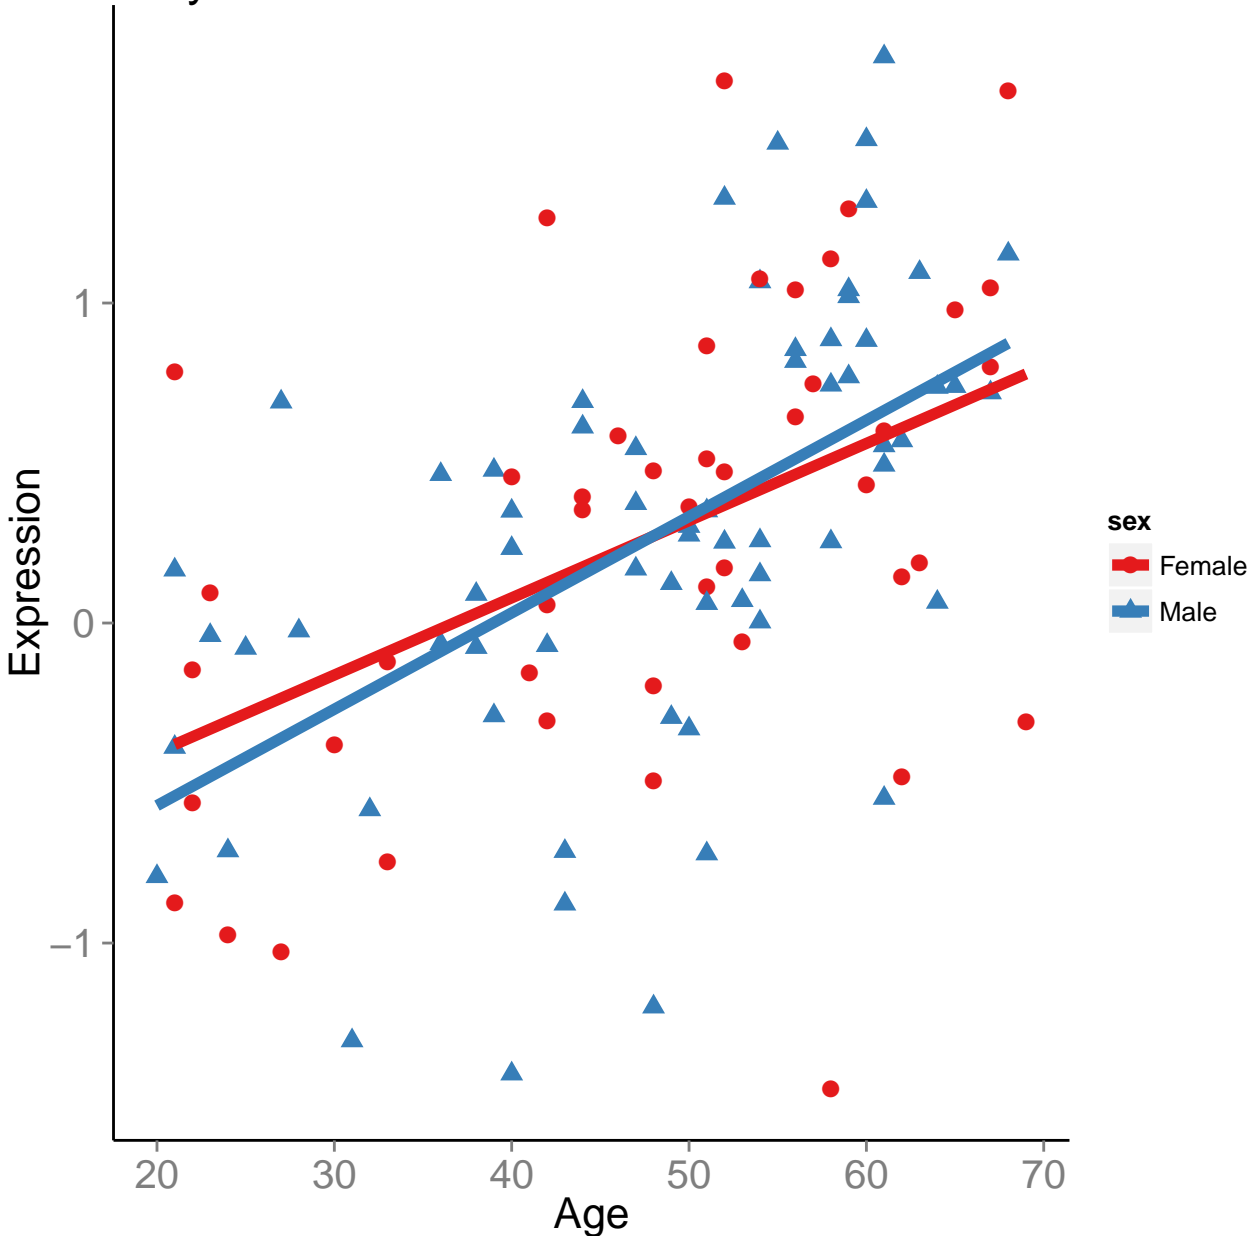

Artery: AC005726.6 Pearson-R=0.52 Pval=4.70E-09

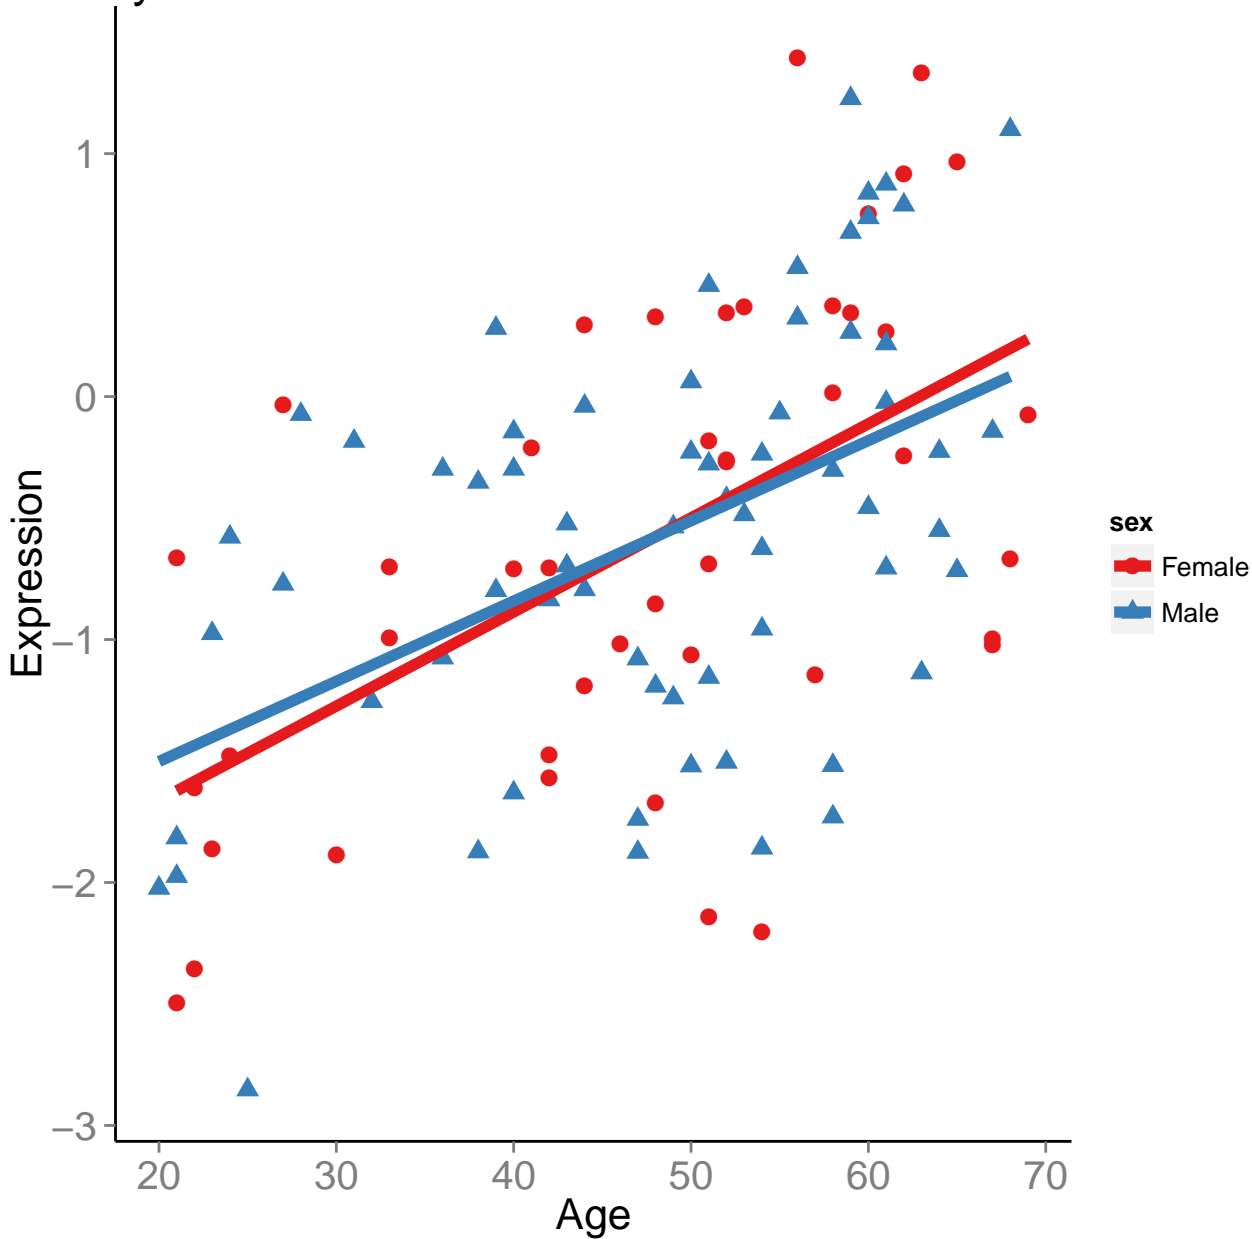

Artery: TCIRG1 Pearson-R=0.52 Pval=4.41E-09

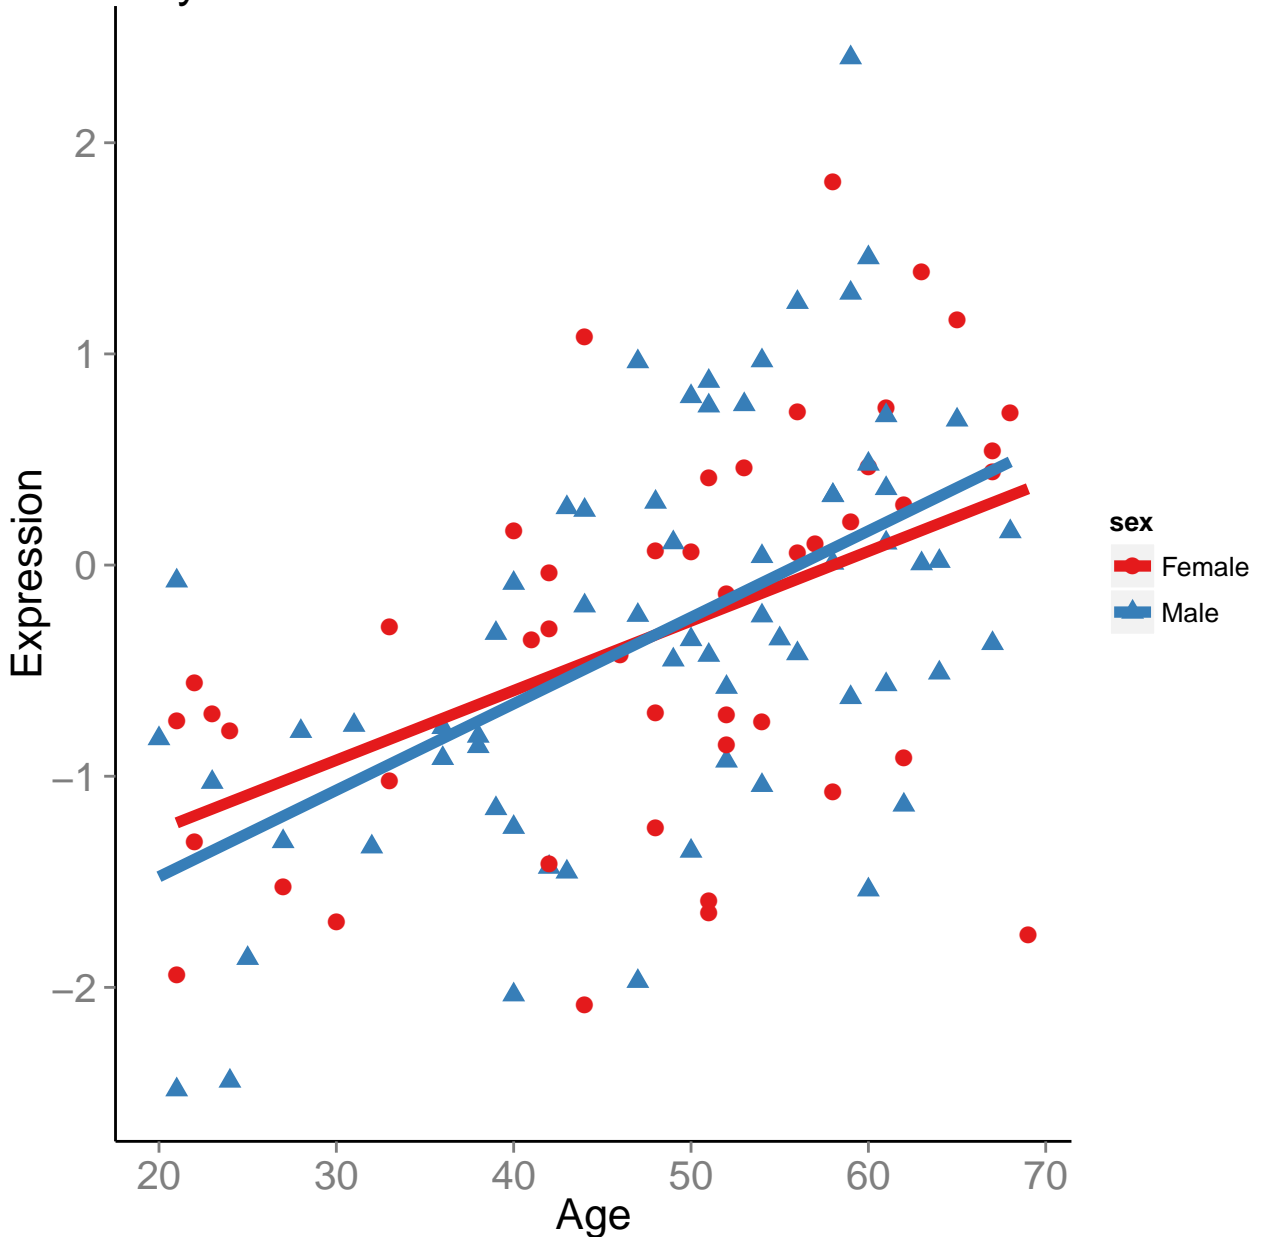

Artery: CUL2 Pearson-R=-0.52 Pval=4.23E-09

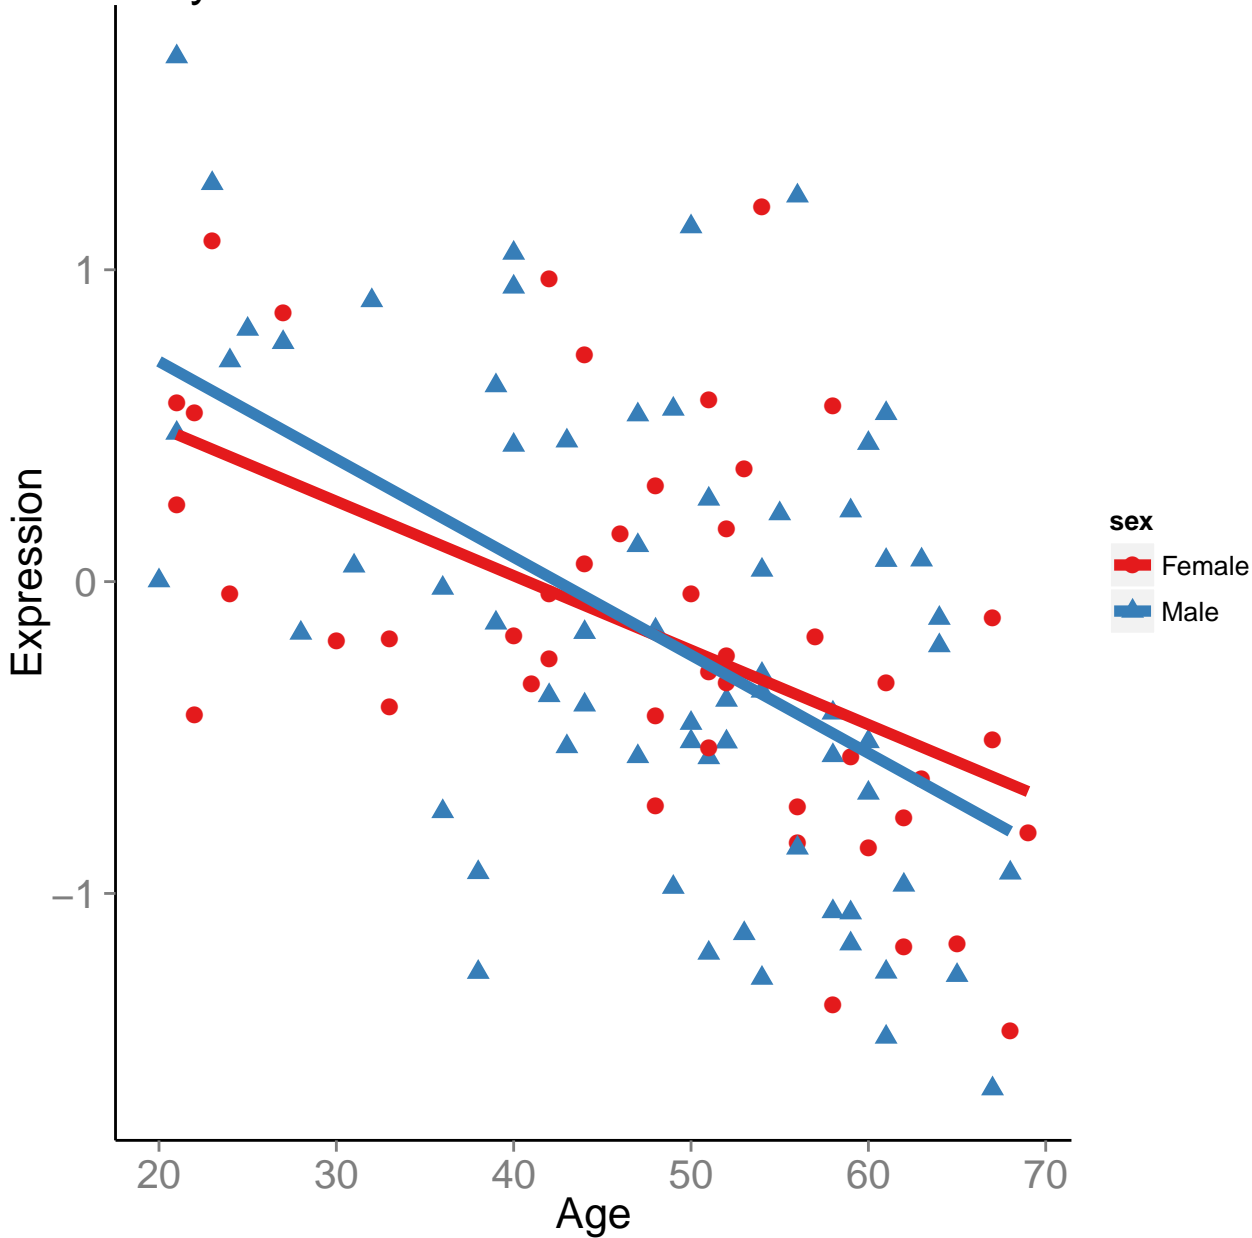

Artery: NLRP1 Pearson-R=0.52 Pval=4.38E-09

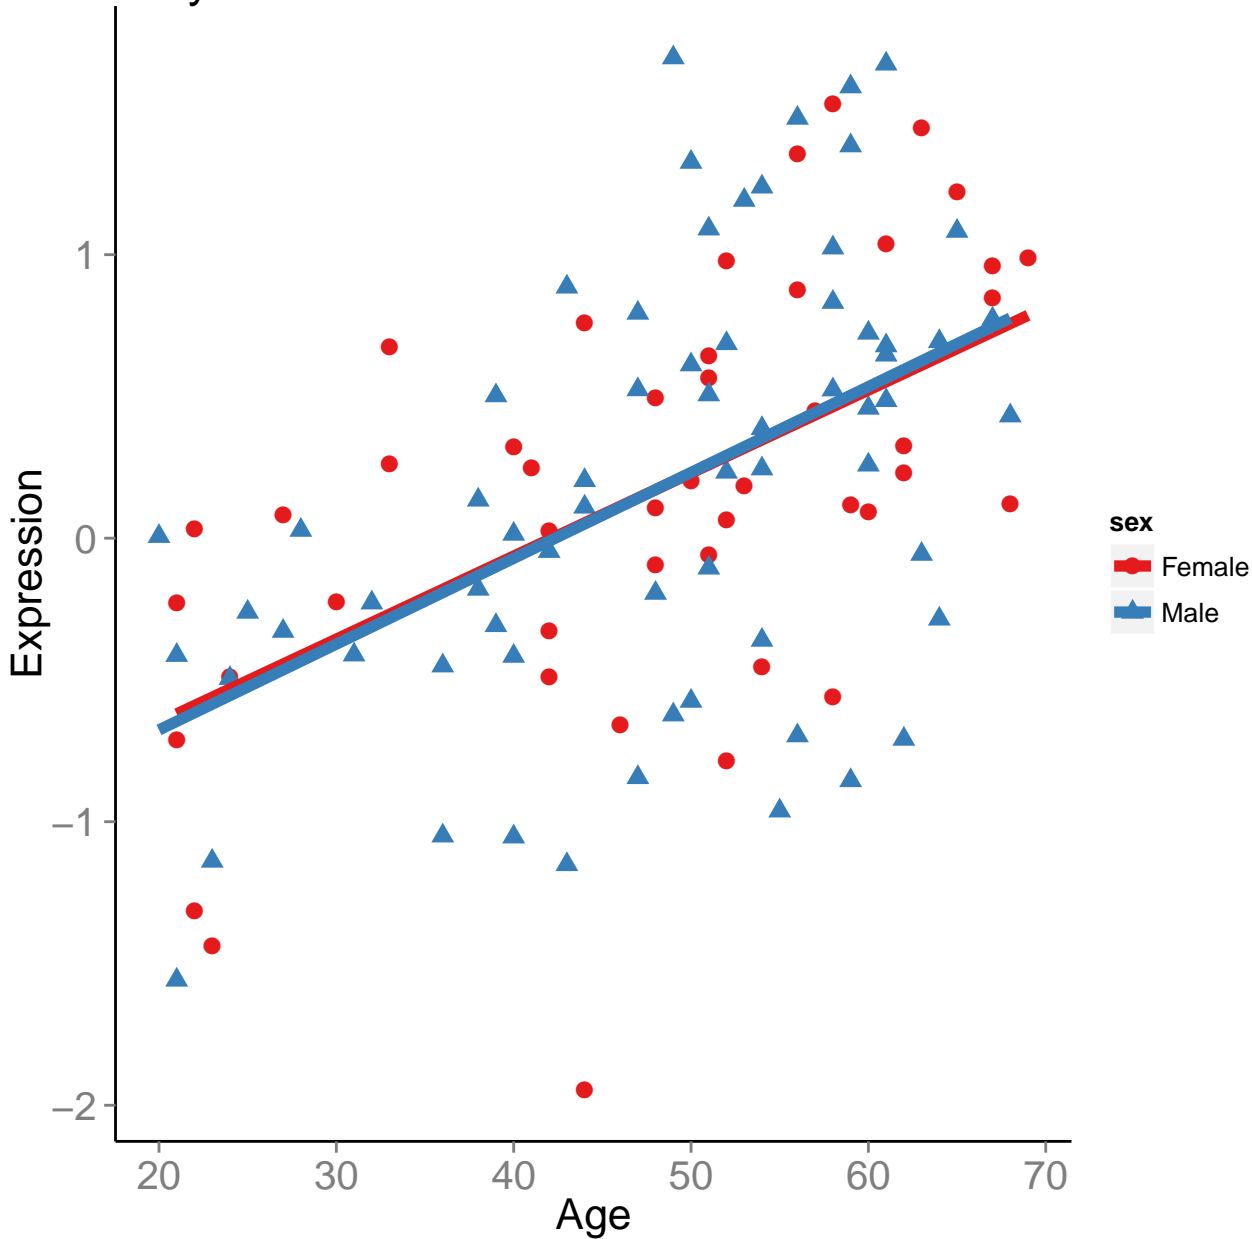

Artery: RP3-499B10.4 Pearson-R=0.52 Pval=4.14E-09

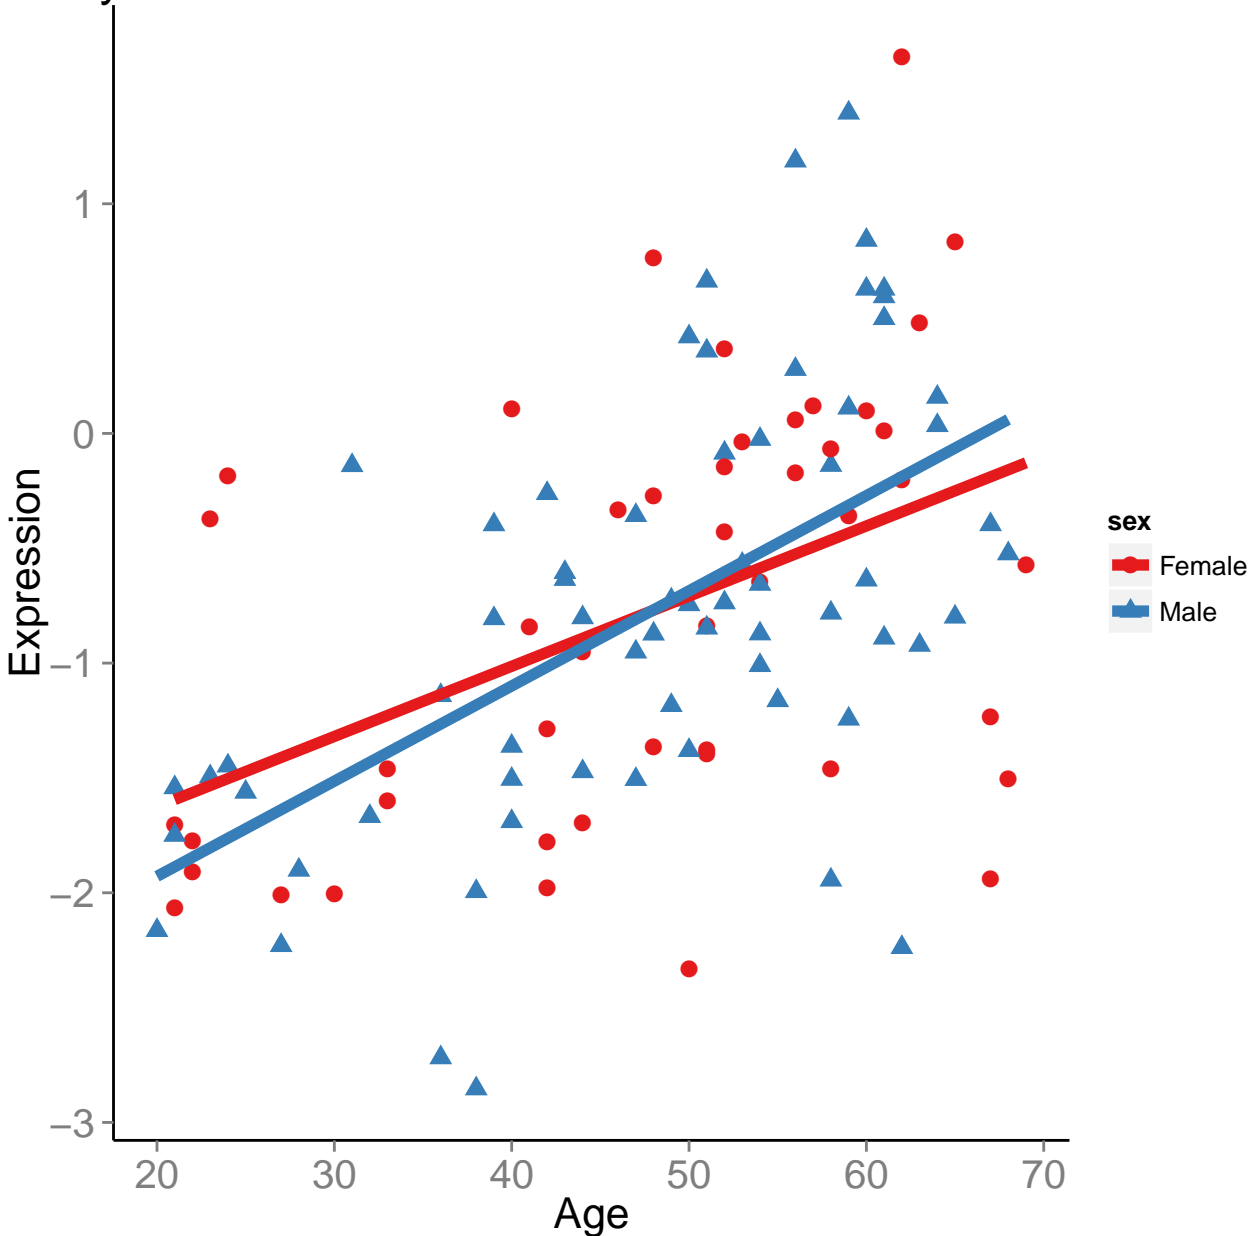



Artery: KCTD13 Pearson-R=0.52 Pval=4.64E-09

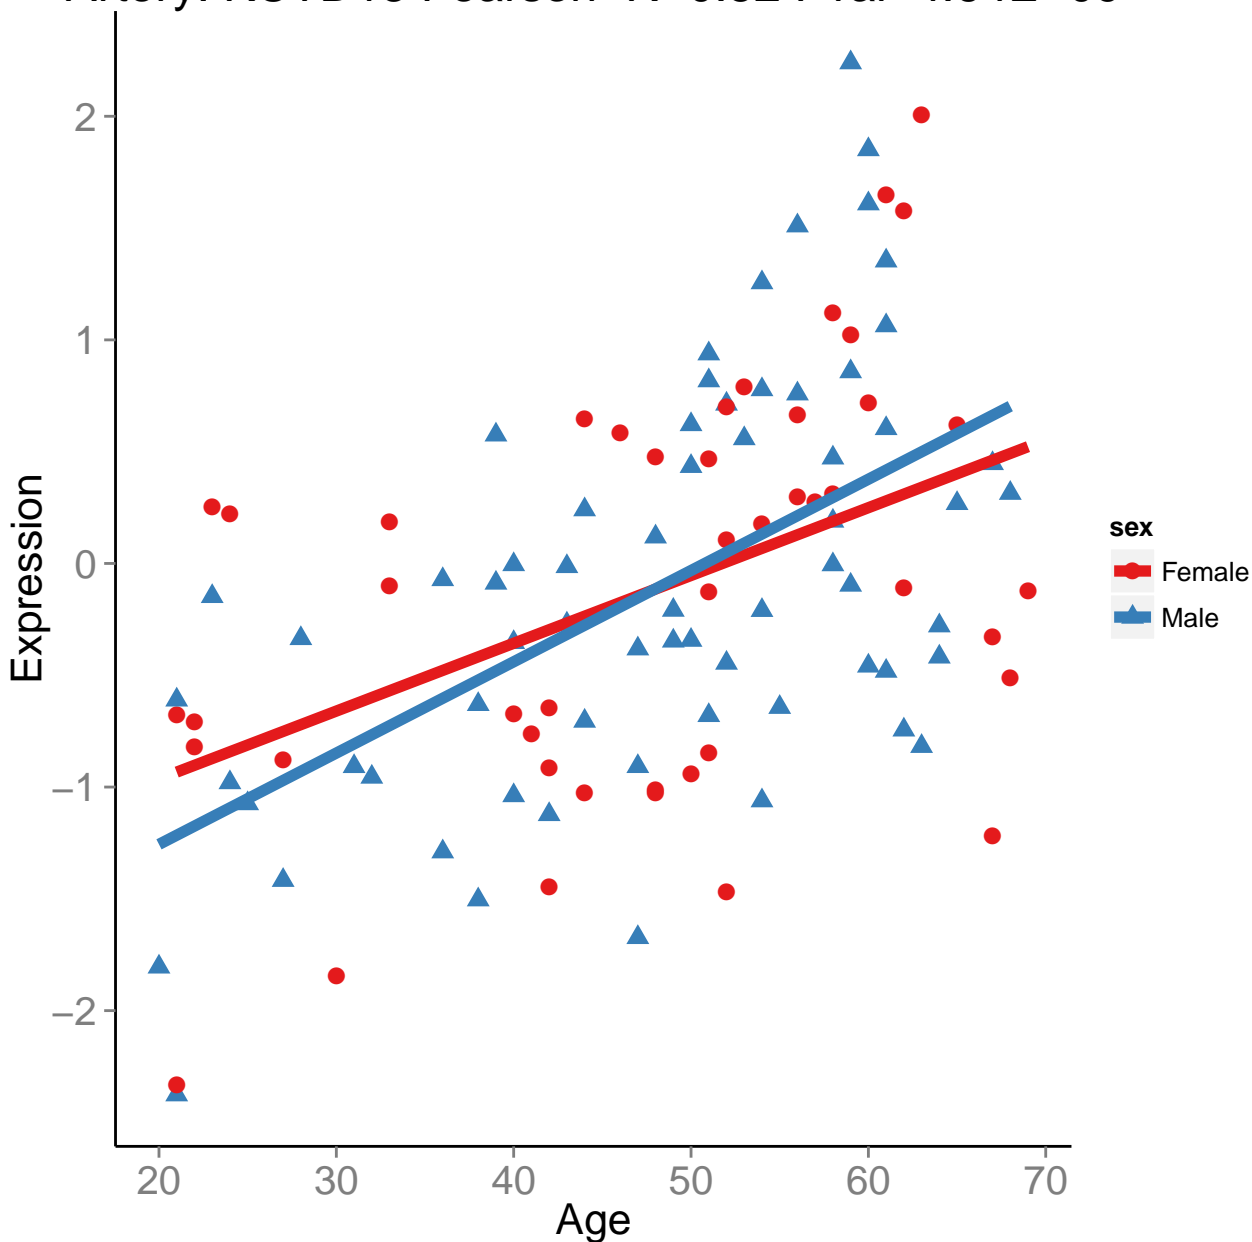

Artery: RP11-234K19.2 Pearson-R=0.52 Pval=5.12E-09

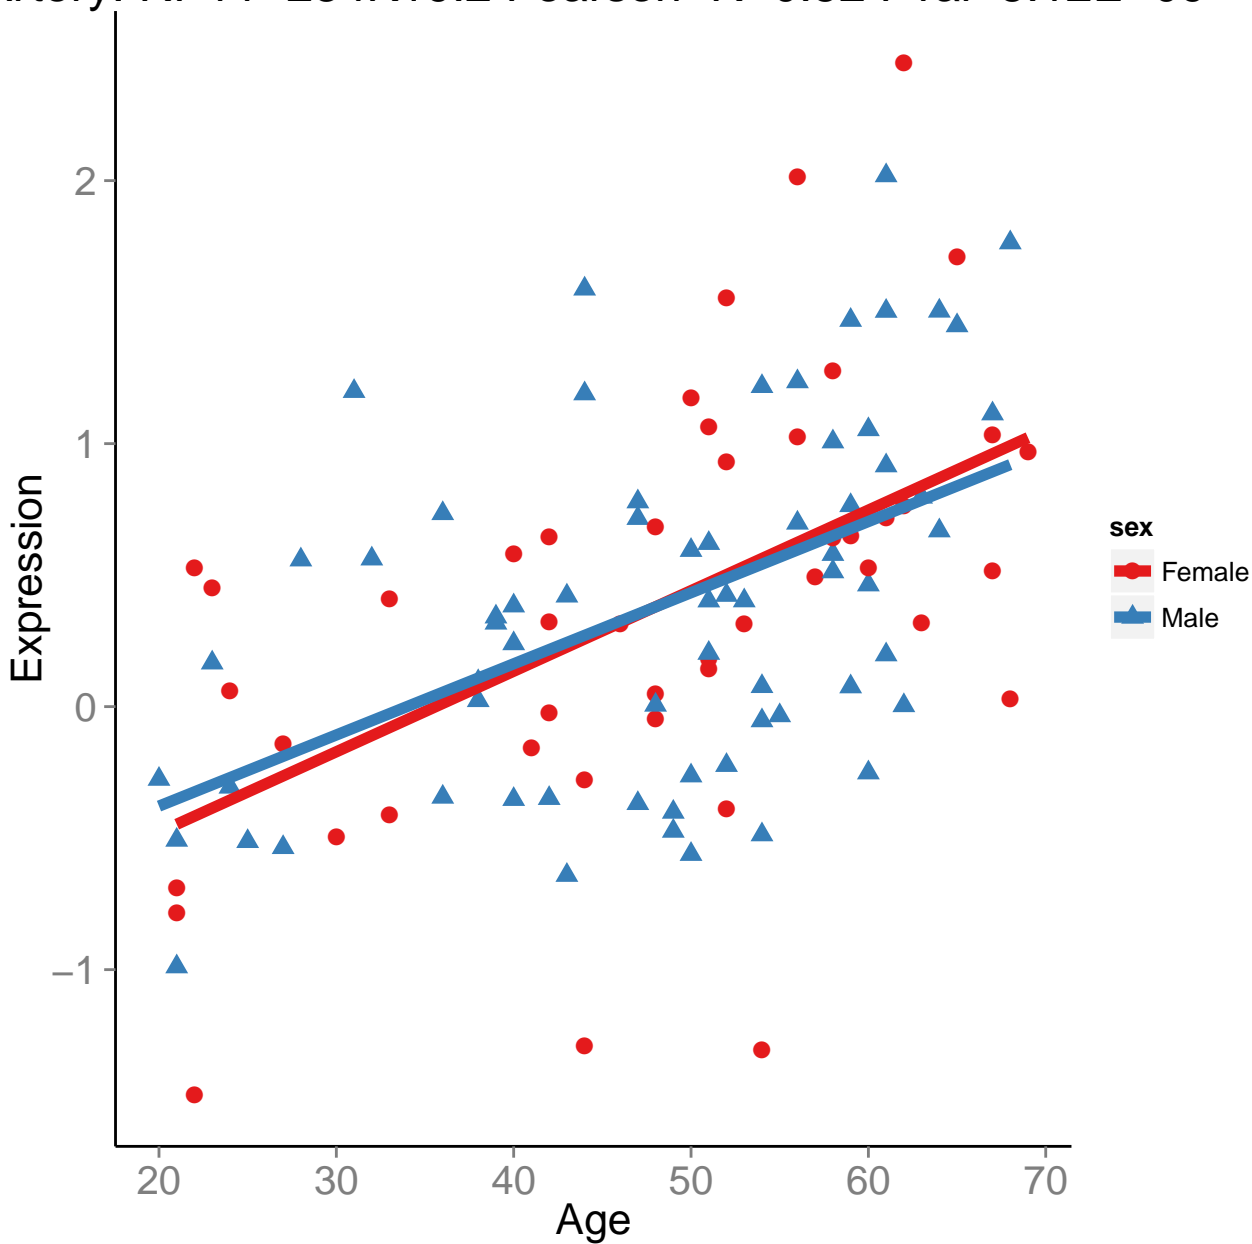

Artery: NPAS1 Pearson-R=0.52 Pval=5.43E-09

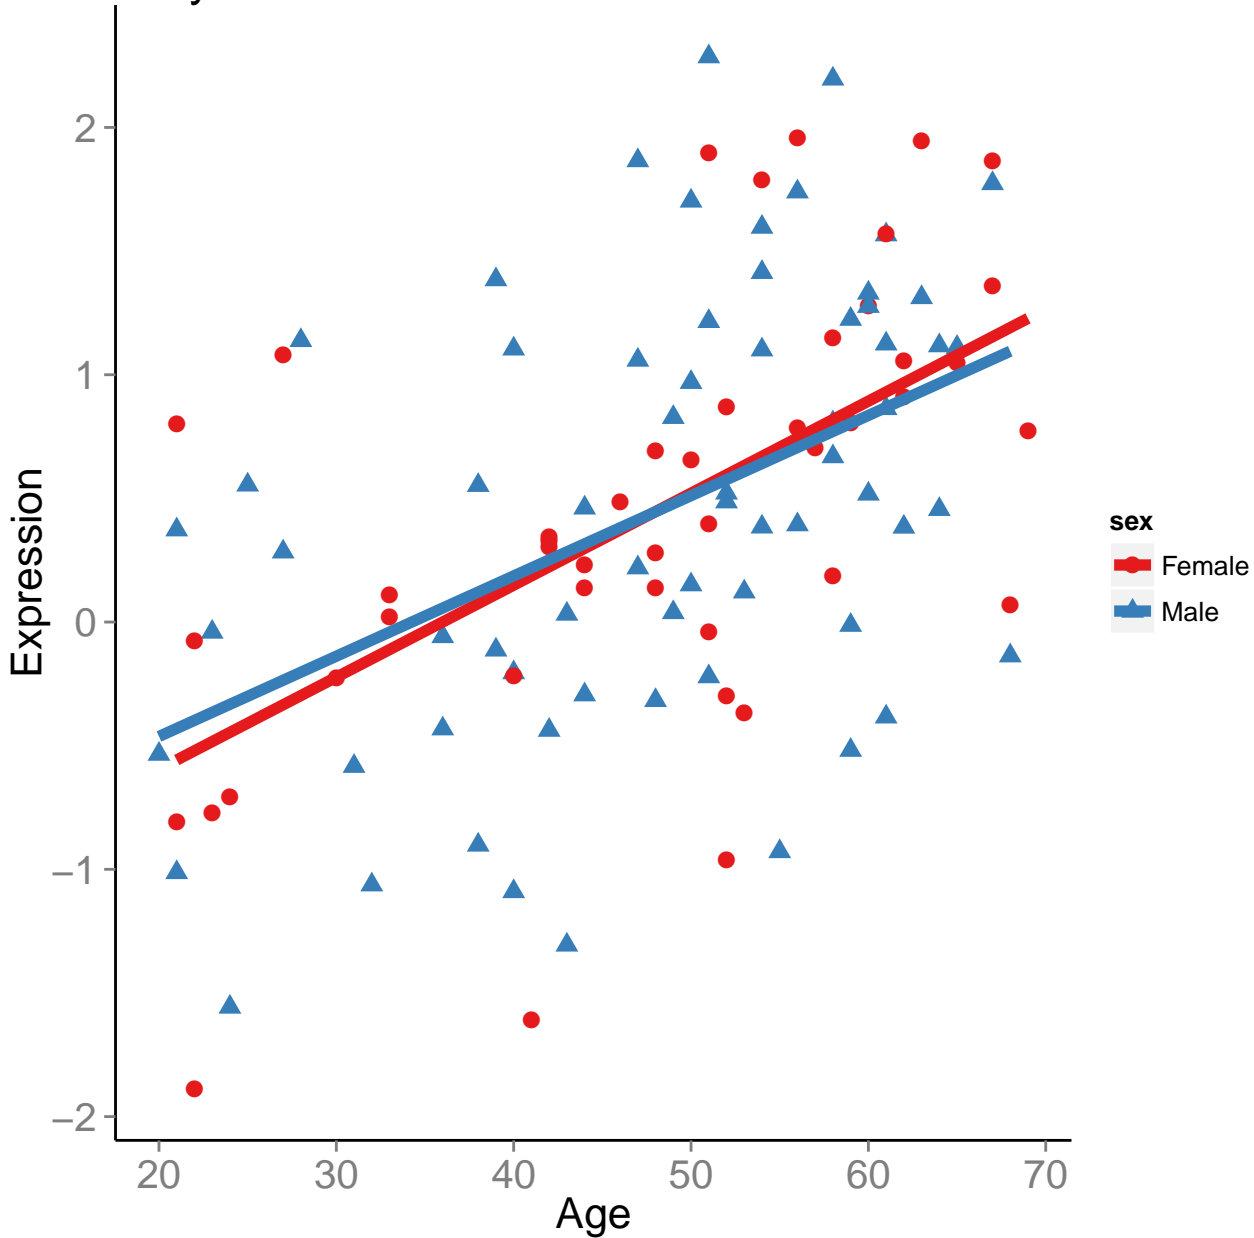

Artery: SNRNP70 Pearson-R=0.52 Pval=5.52E-09

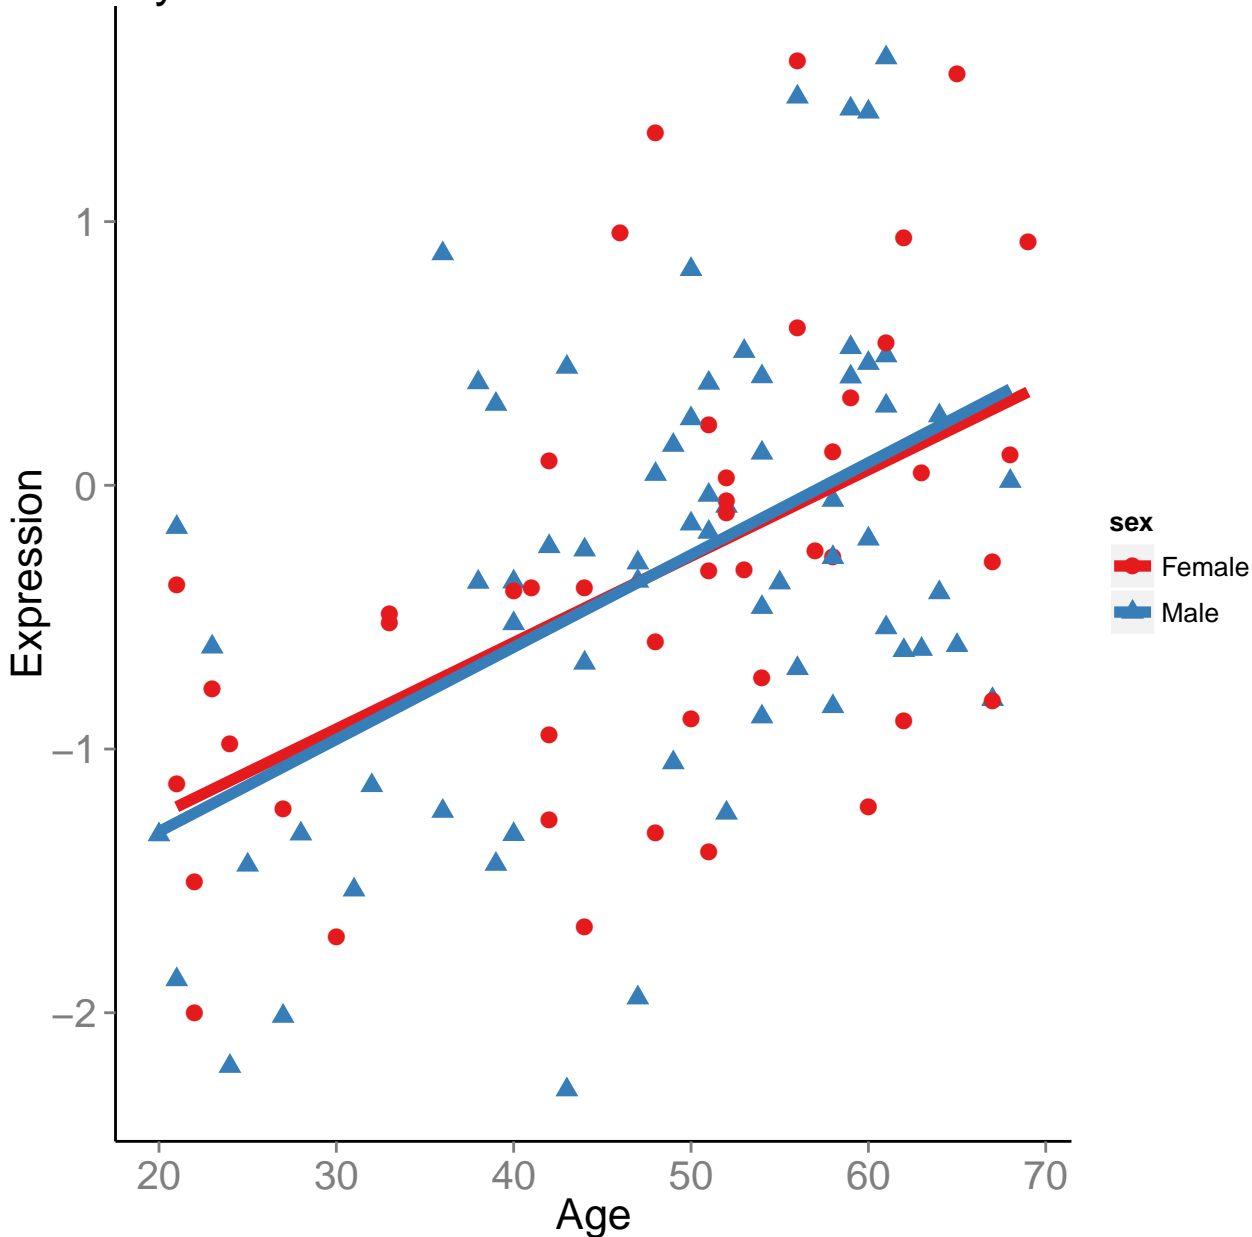

Artery: PICK1 Pearson-R=0.52 Pval=5.98E-09

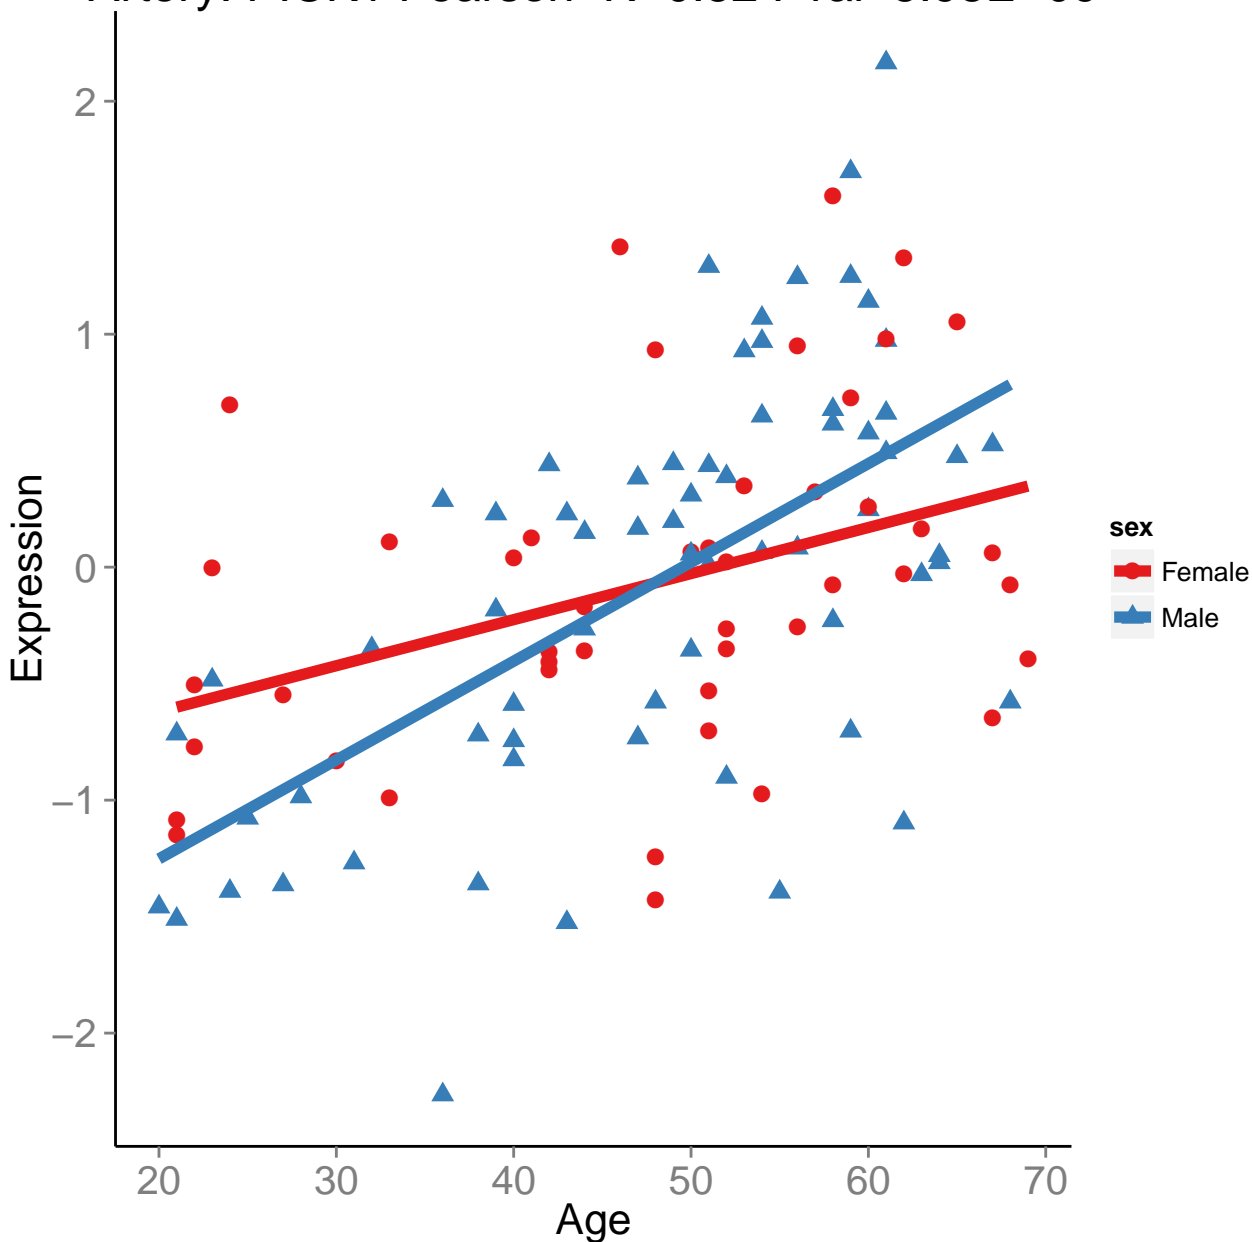

Artery: RP11-428C6.1 Pearson-R=0.52 Pval=6.13E-09

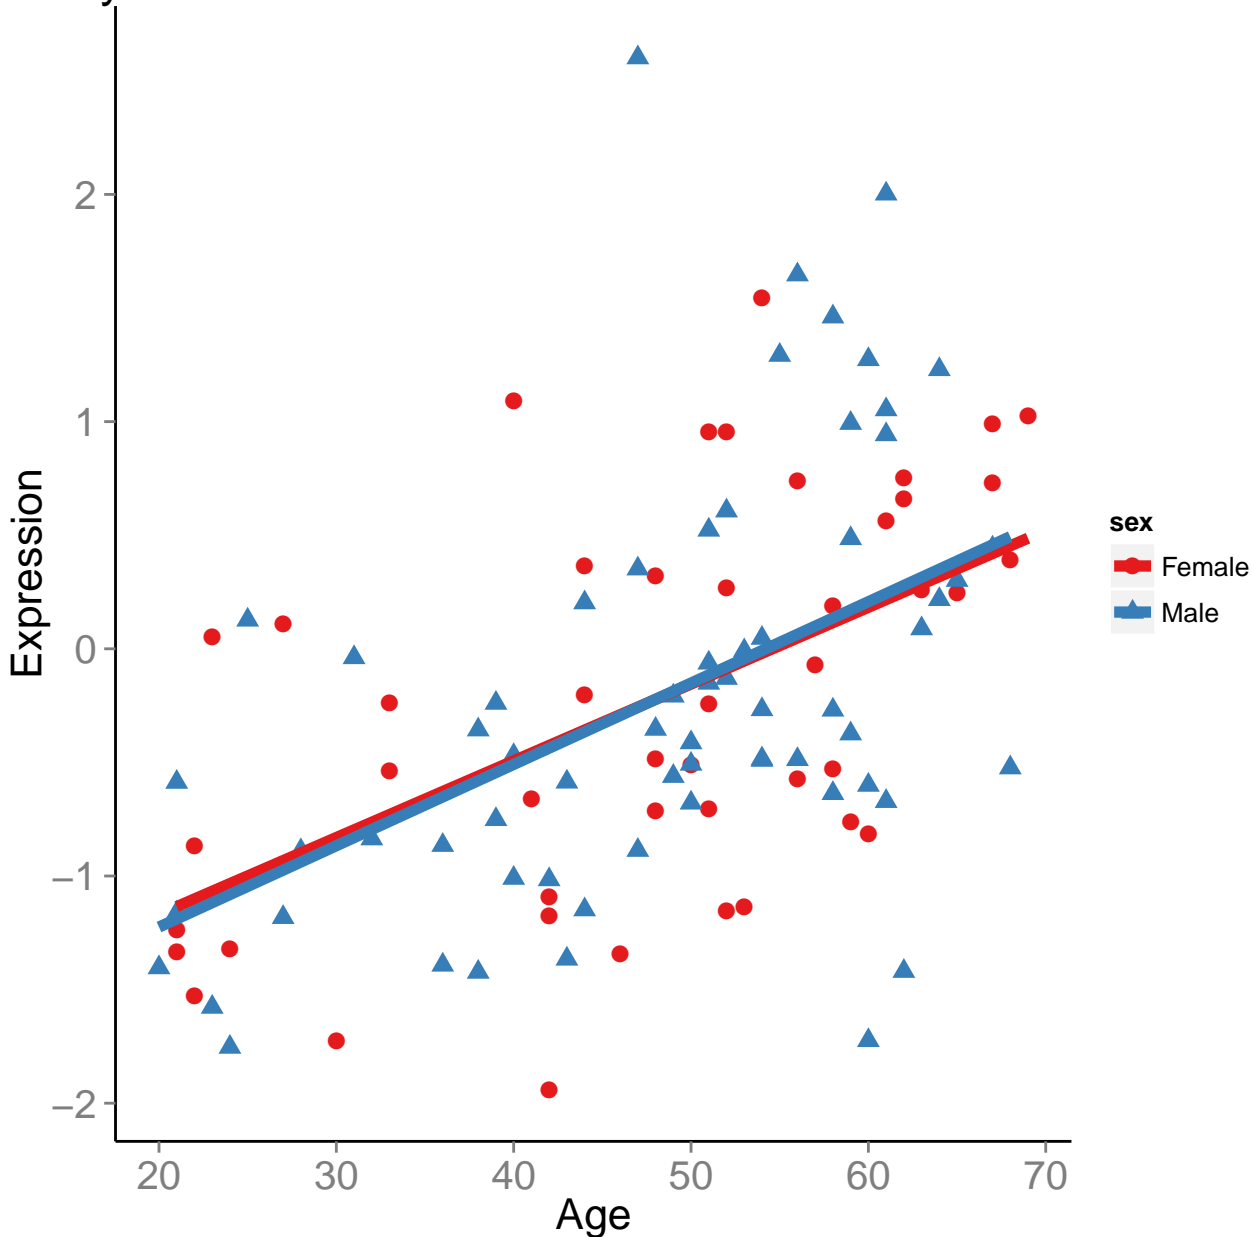

Artery: P4HTM Pearson-R=0.51 Pval=6.55E-09

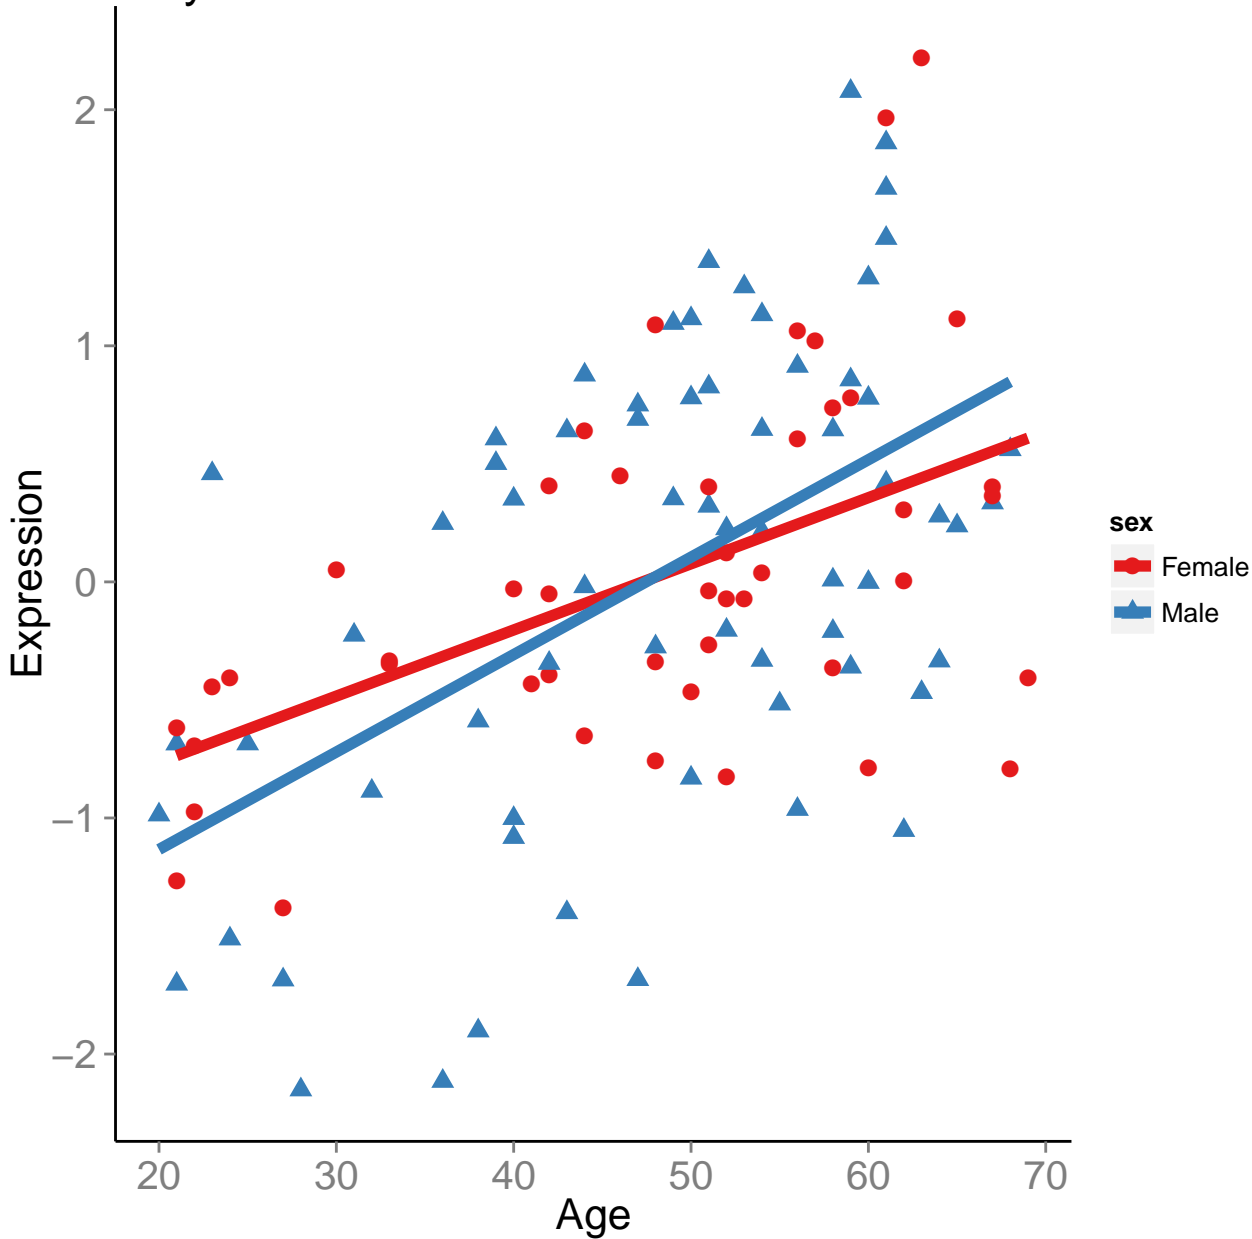

Artery: HDAC6 Pearson-R=0.51 Pval=6.60E-09

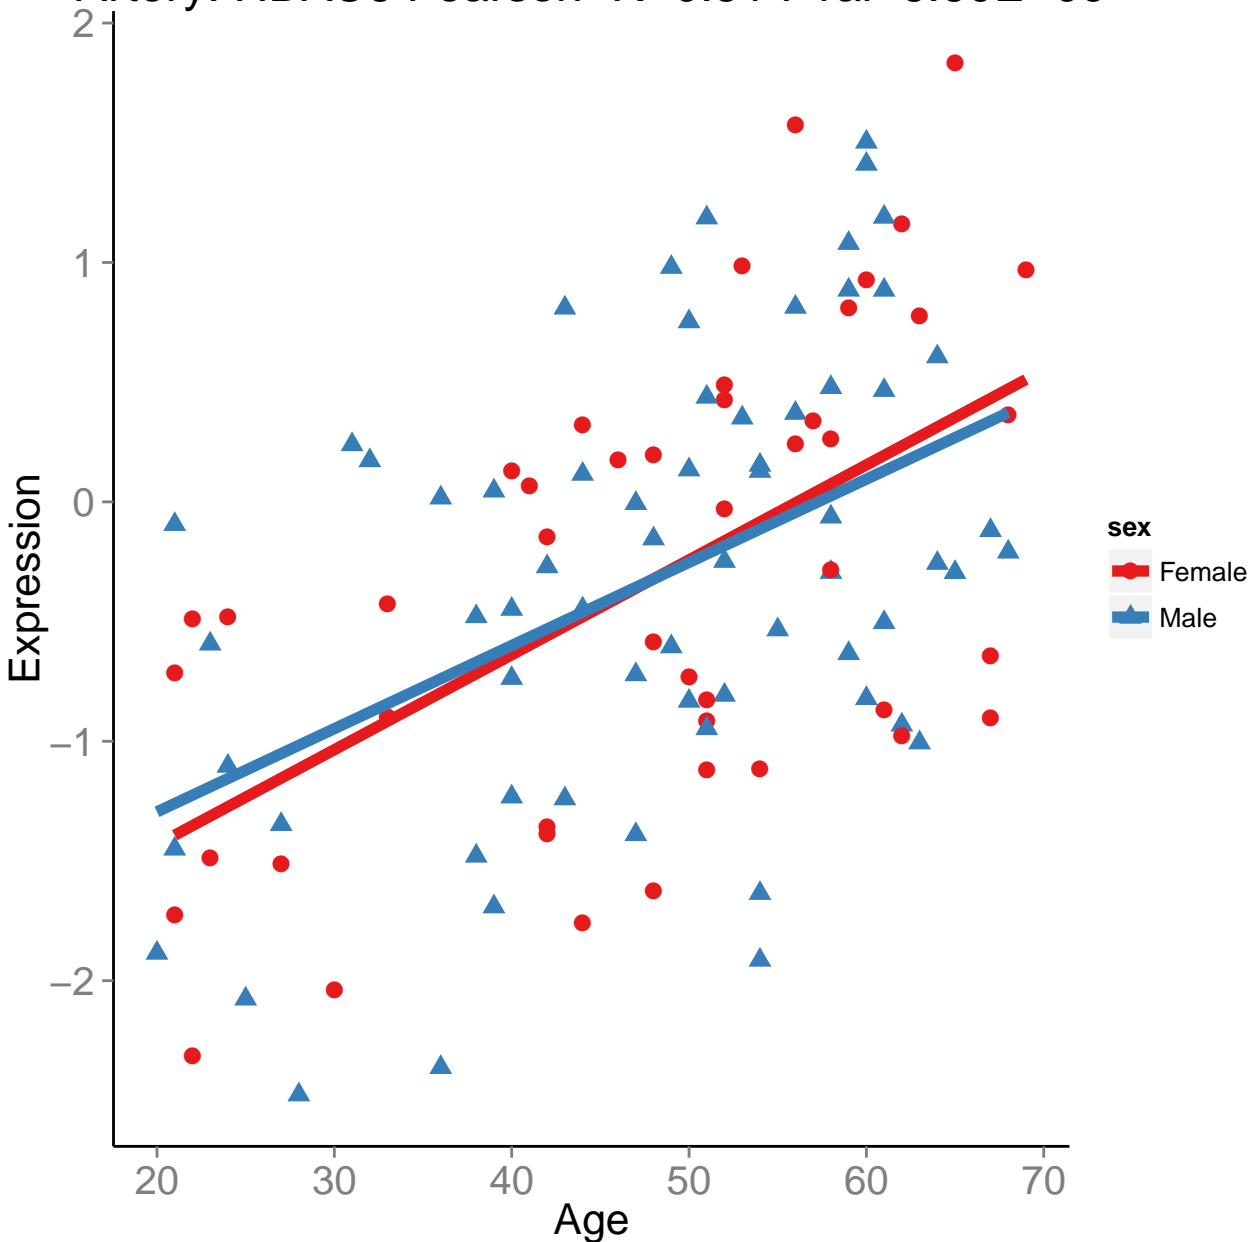



Artery: KIAA0913 Pearson-R=0.51 Pval=7.32E-09

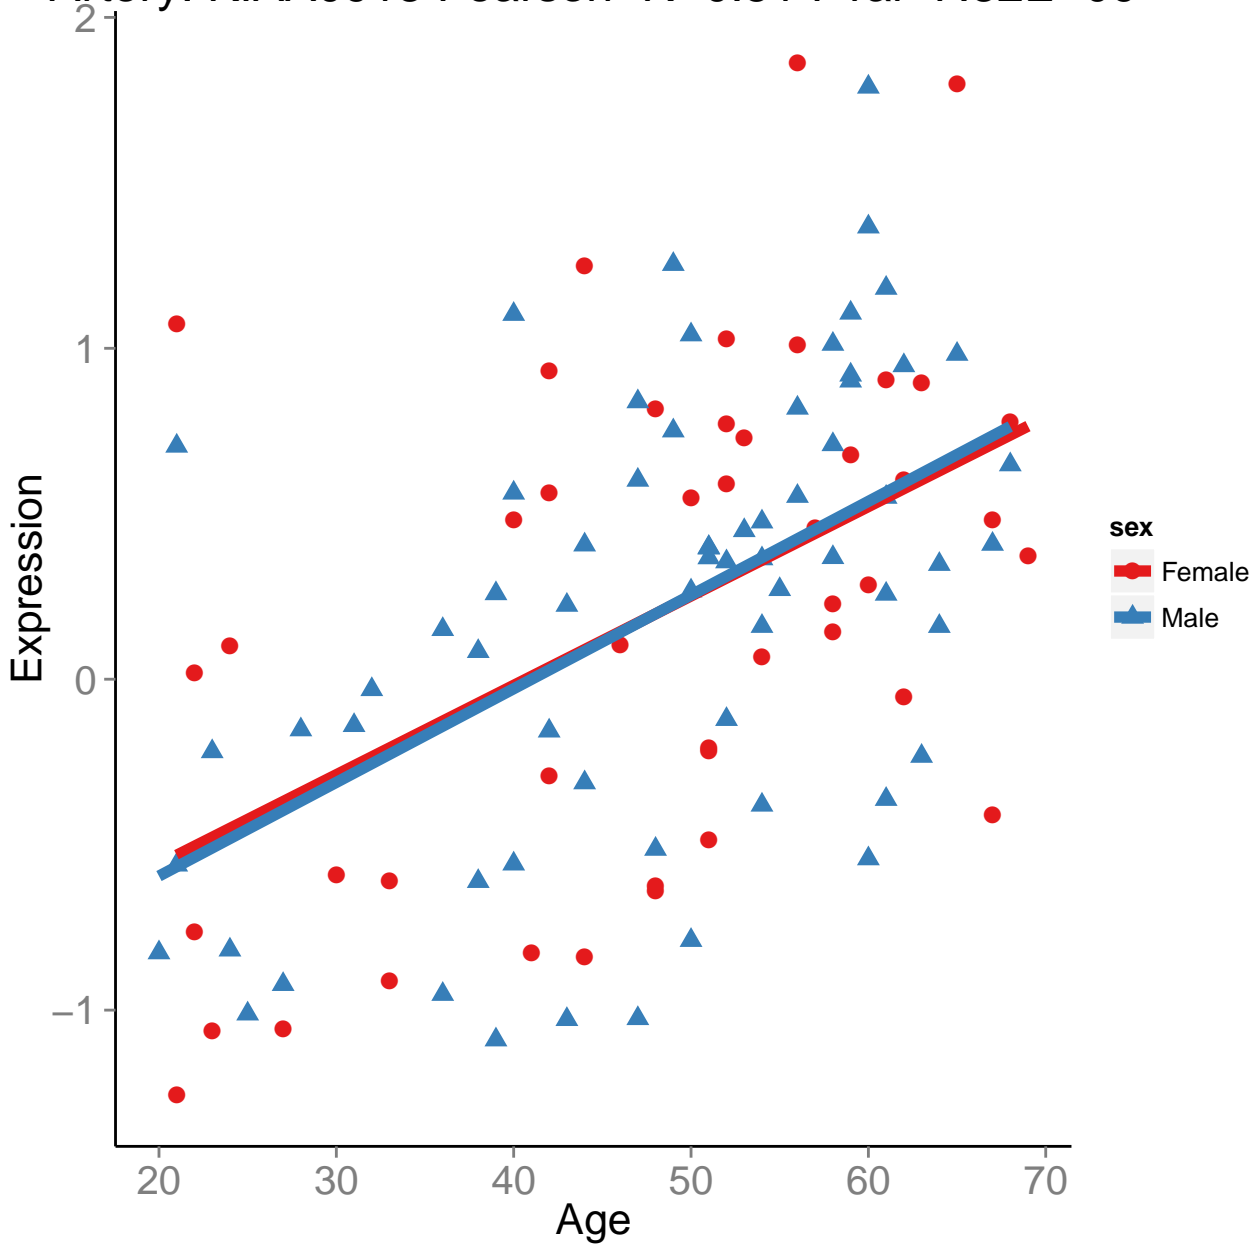

Artery: RP11-106M3.2 Pearson-R=0.51 Pval=7.47E-09

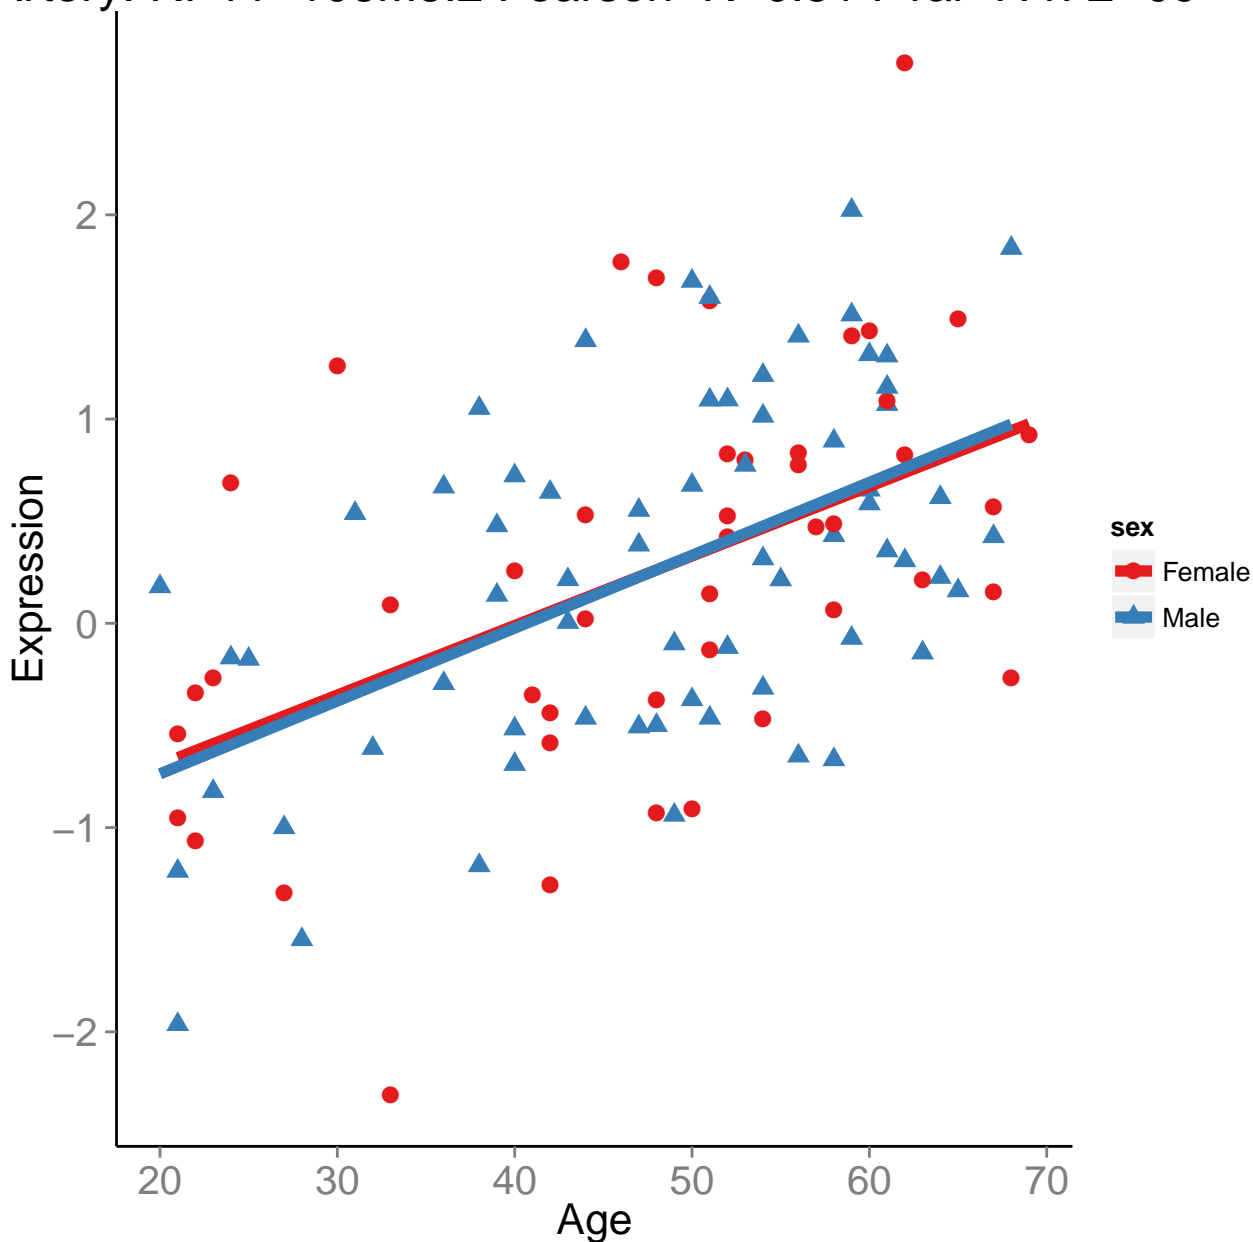

Artery: FAM73B Pearson-R=0.51 Pval=7.68E-09

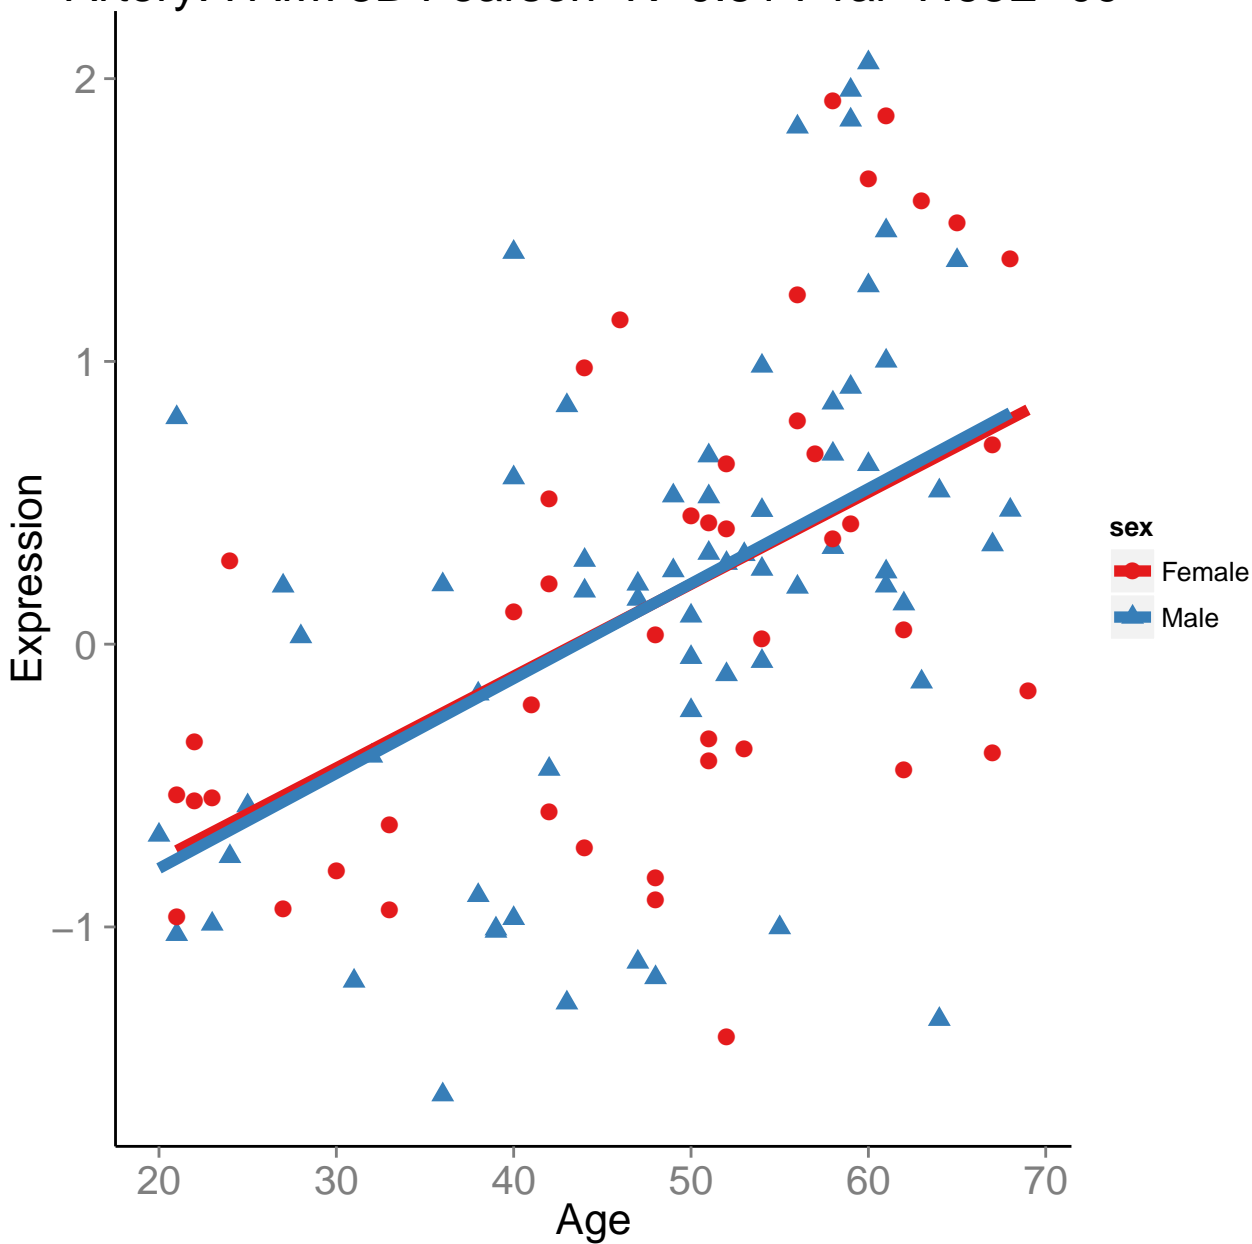

Artery: MRPL35 Pearson-R=-0.51 Pval=8.18E-09

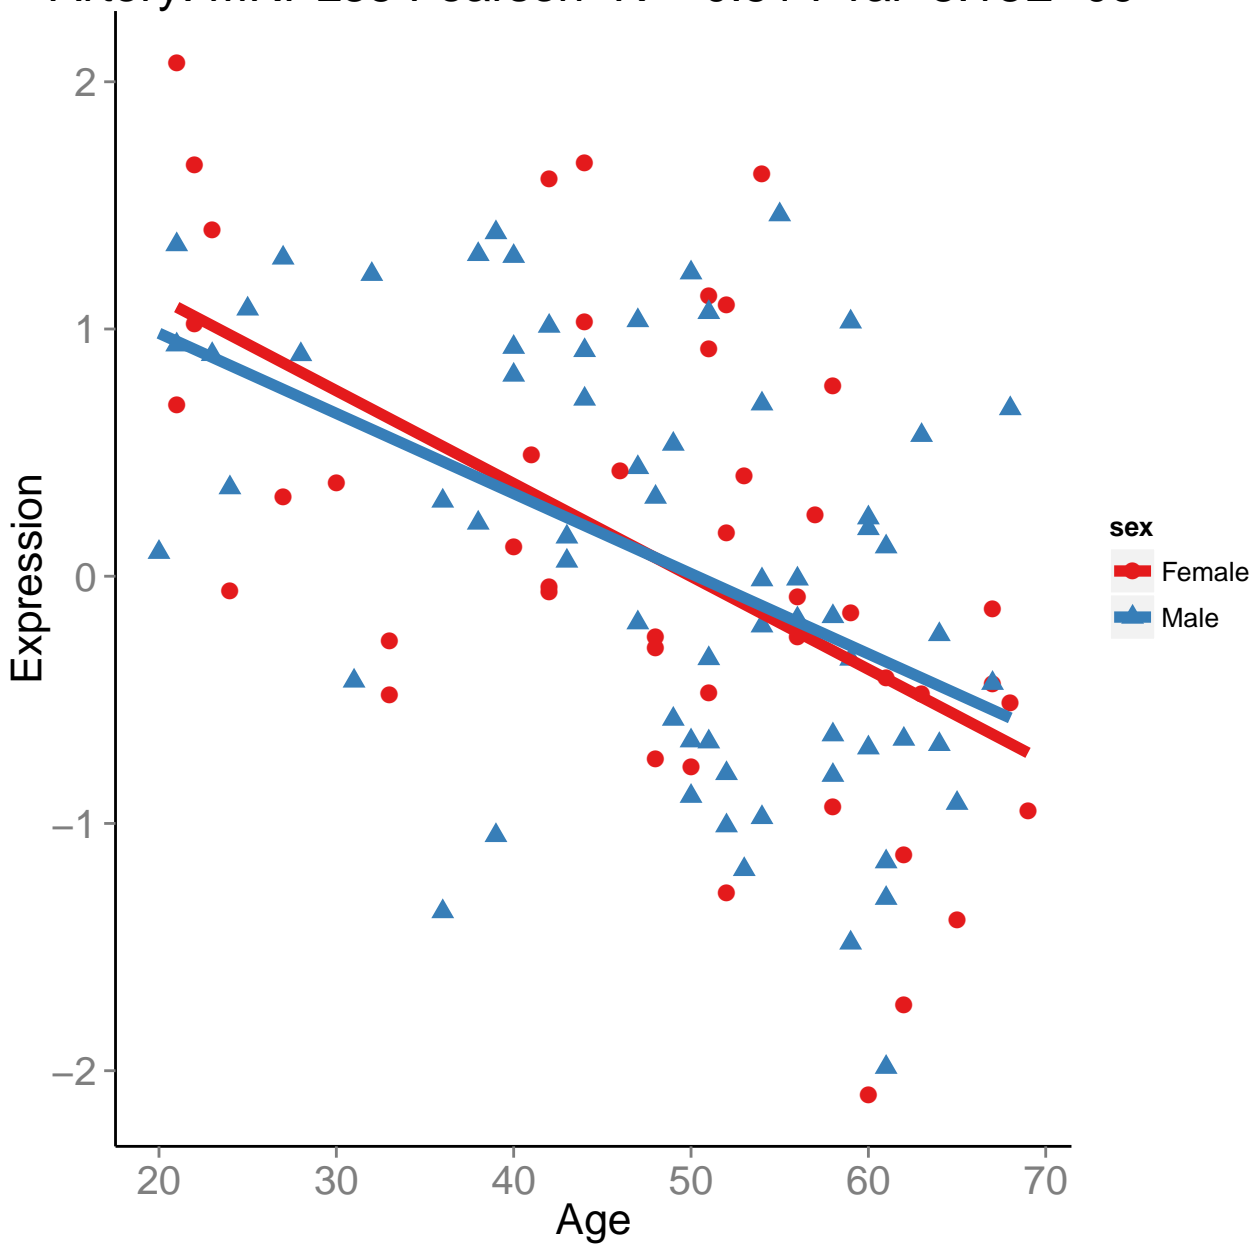

Artery: POLE Pearson-R=0.51 Pval=8.40E-09

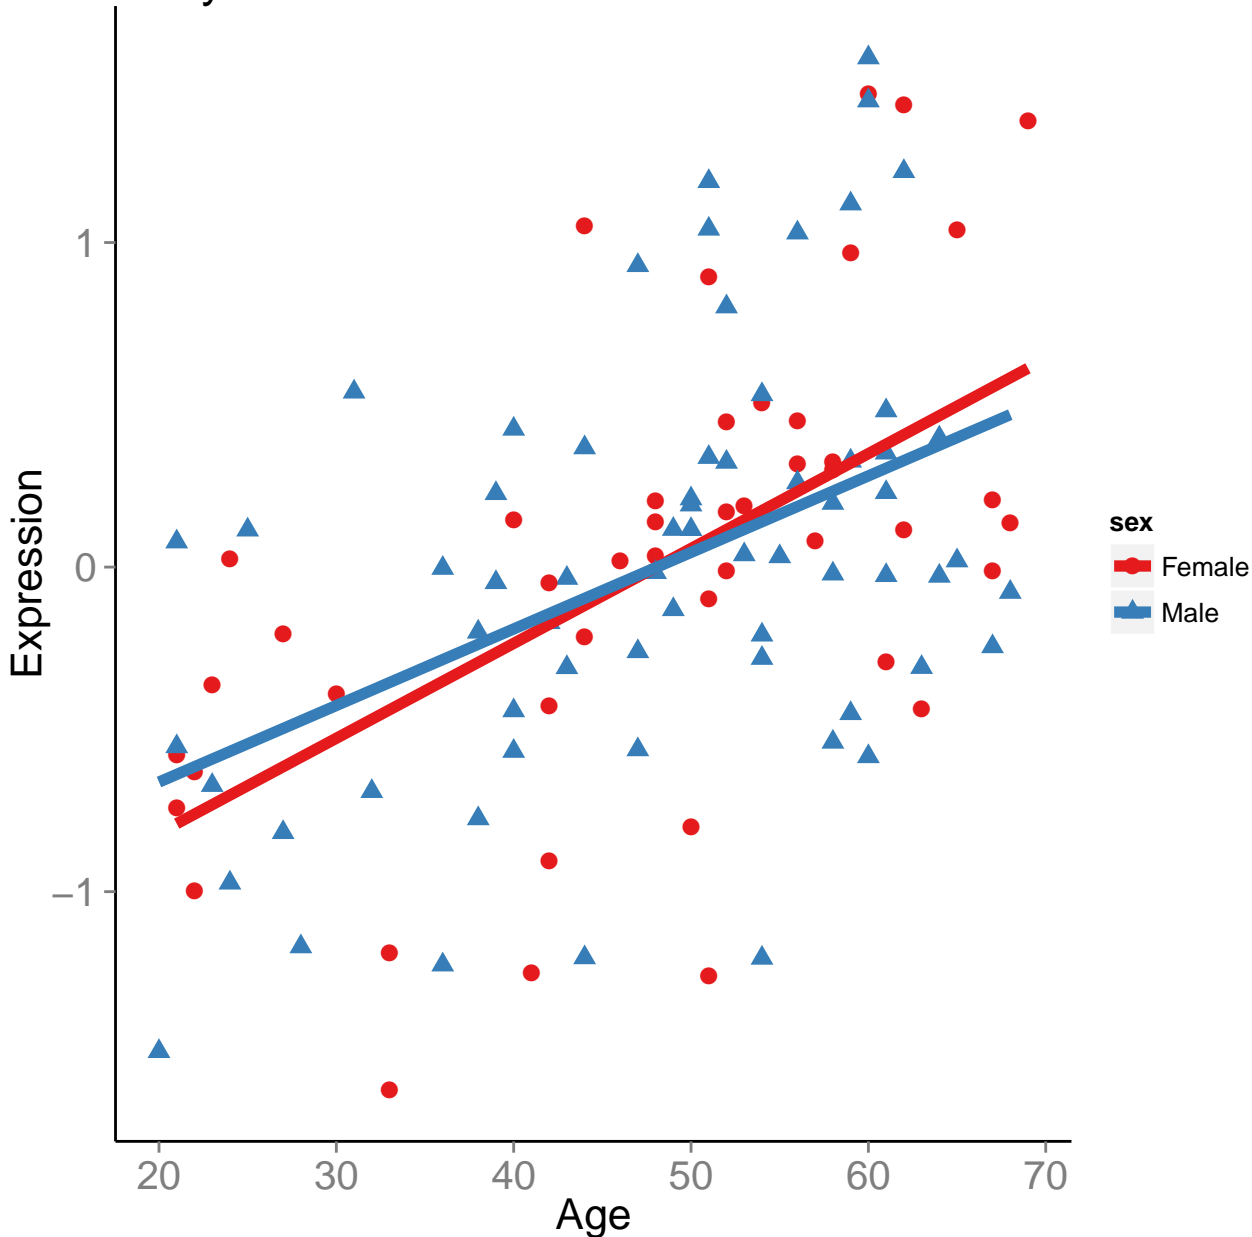

Artery: ACAN Pearson-R=0.51 Pval=9.10E-09

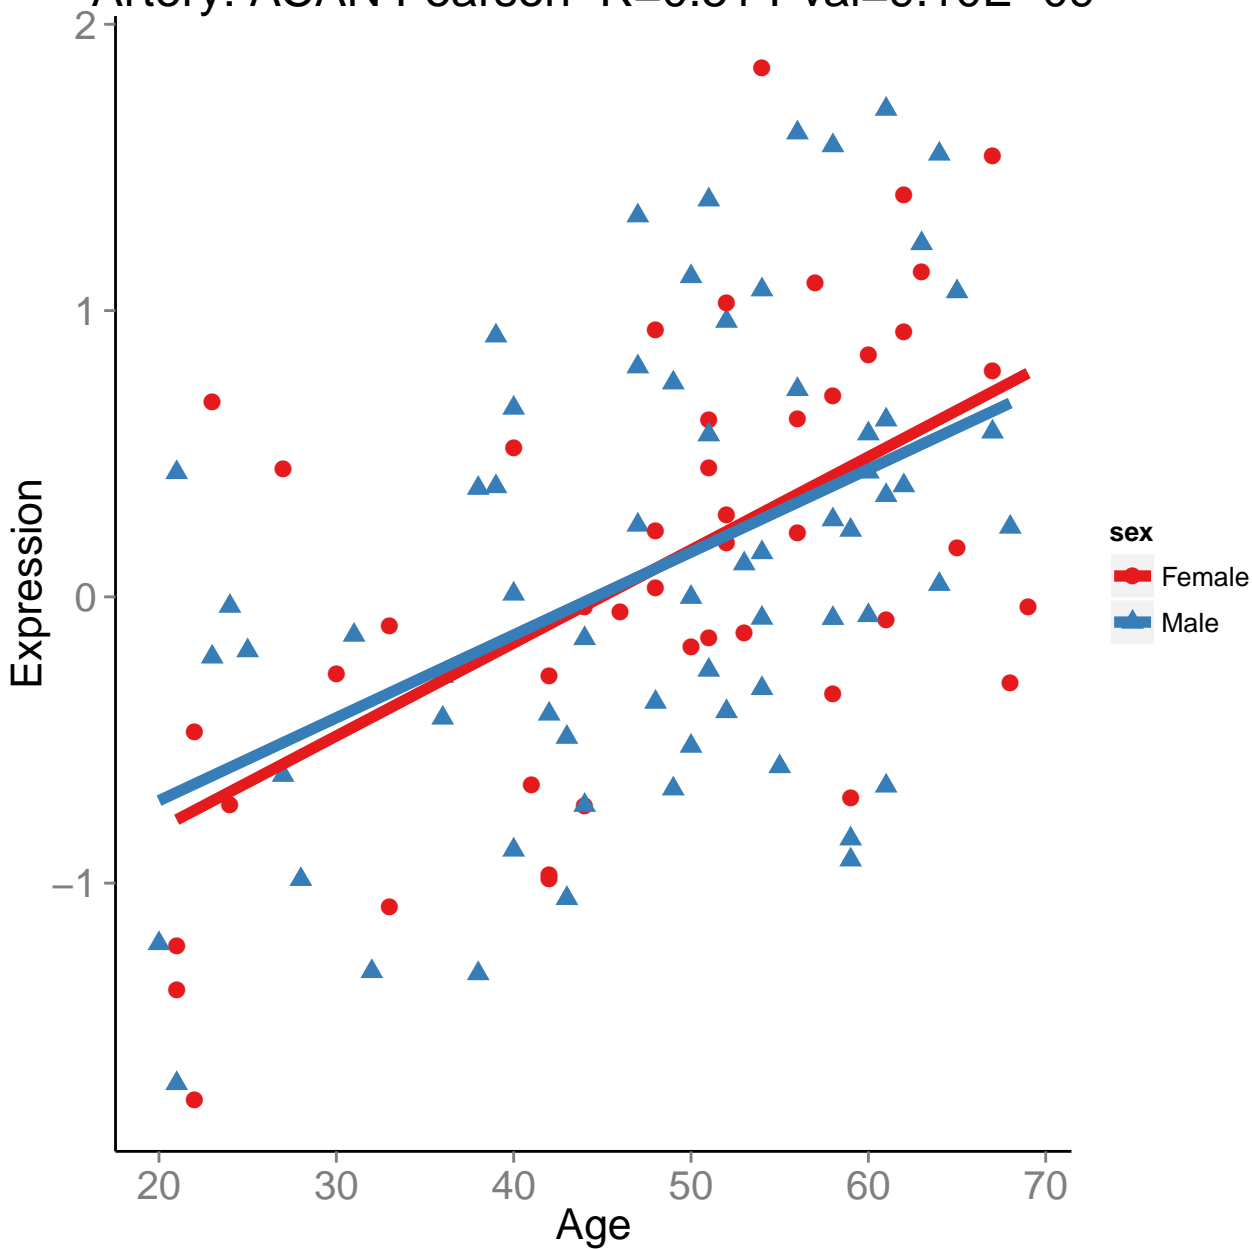

Artery: PTN Pearson-R=0.51 Pval=9.33E-09

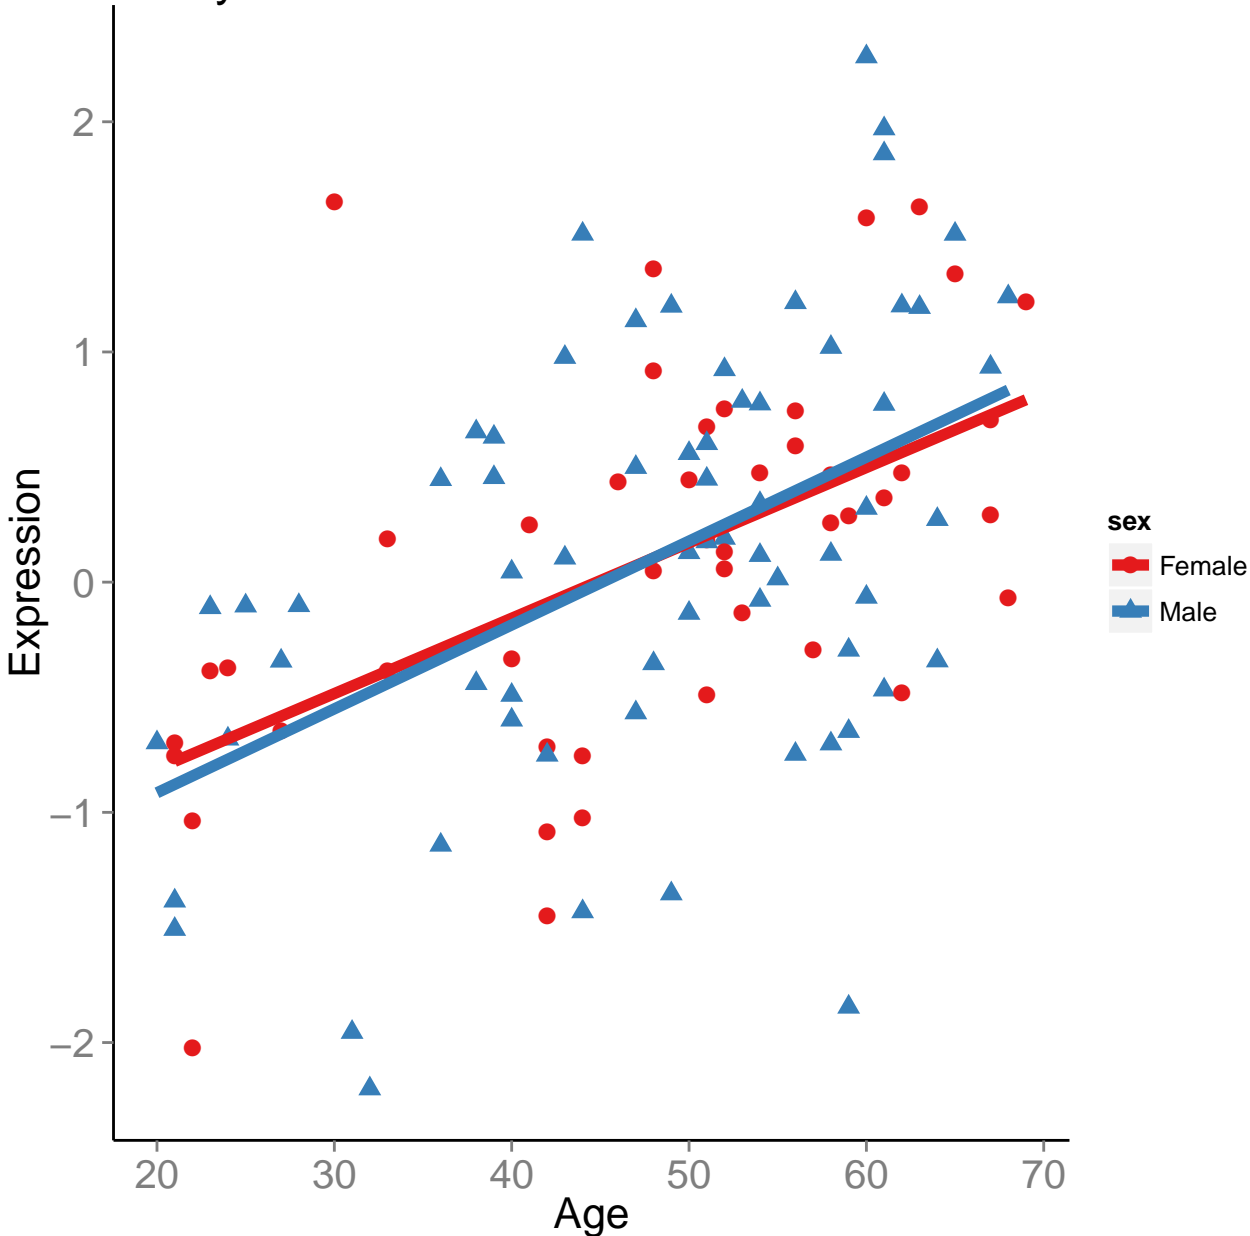

Artery: PRDM8 Pearson-R=0.51 Pval=9.48E-09

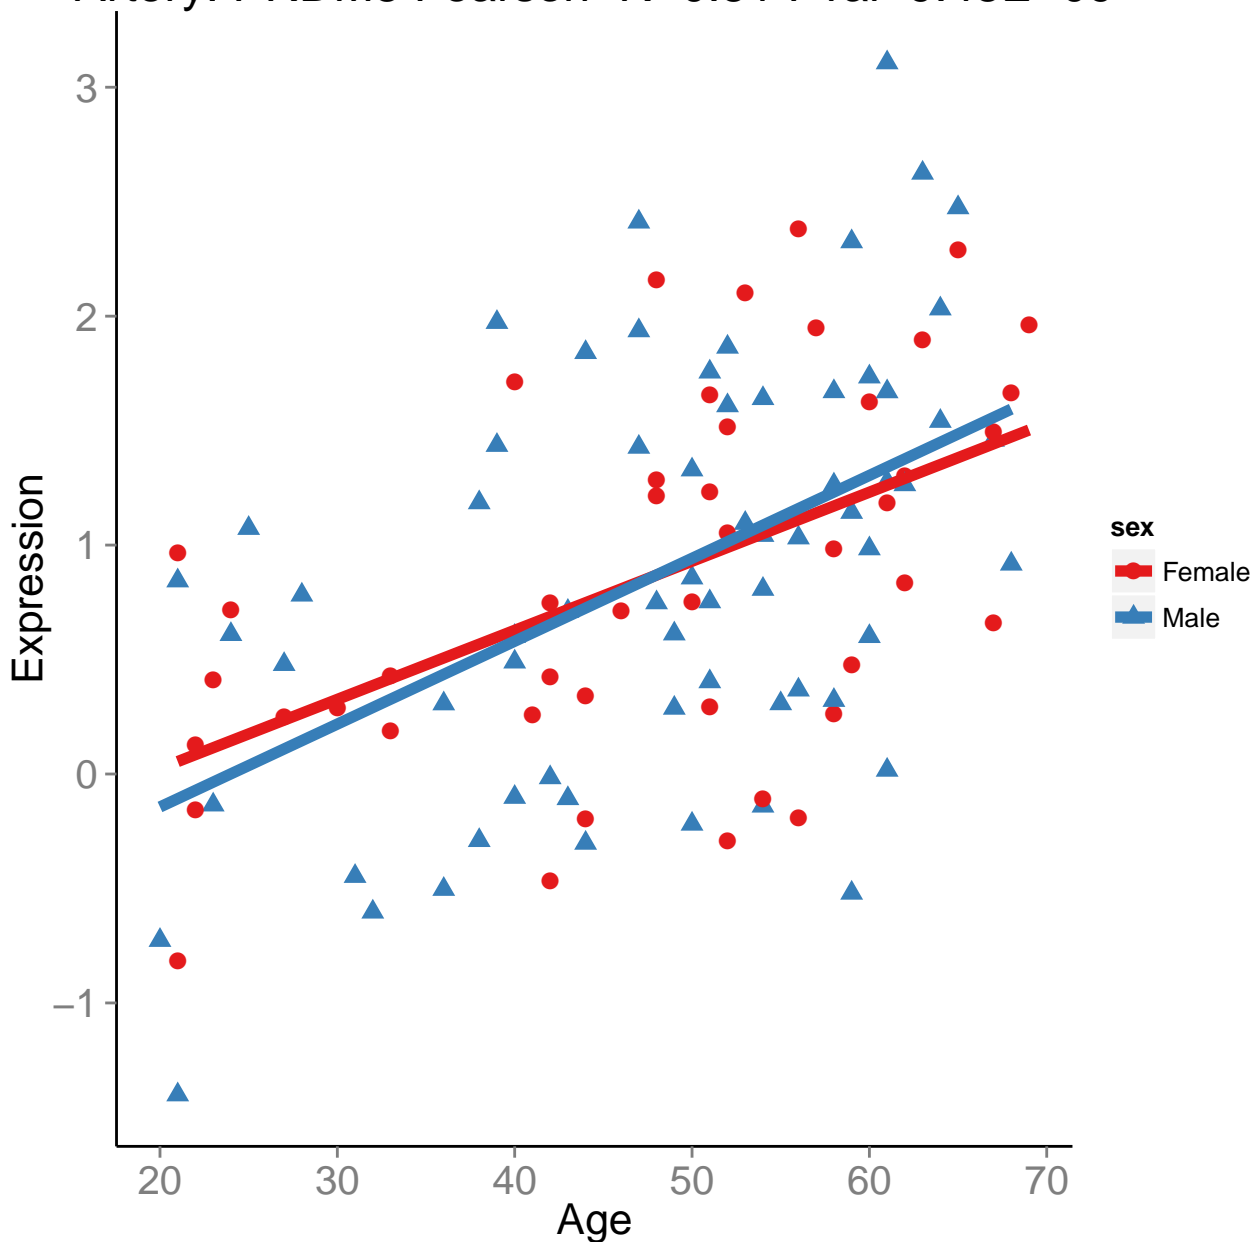



Artery: CSDE1 Pearson-R=-0.51 Pval=9.64E-09

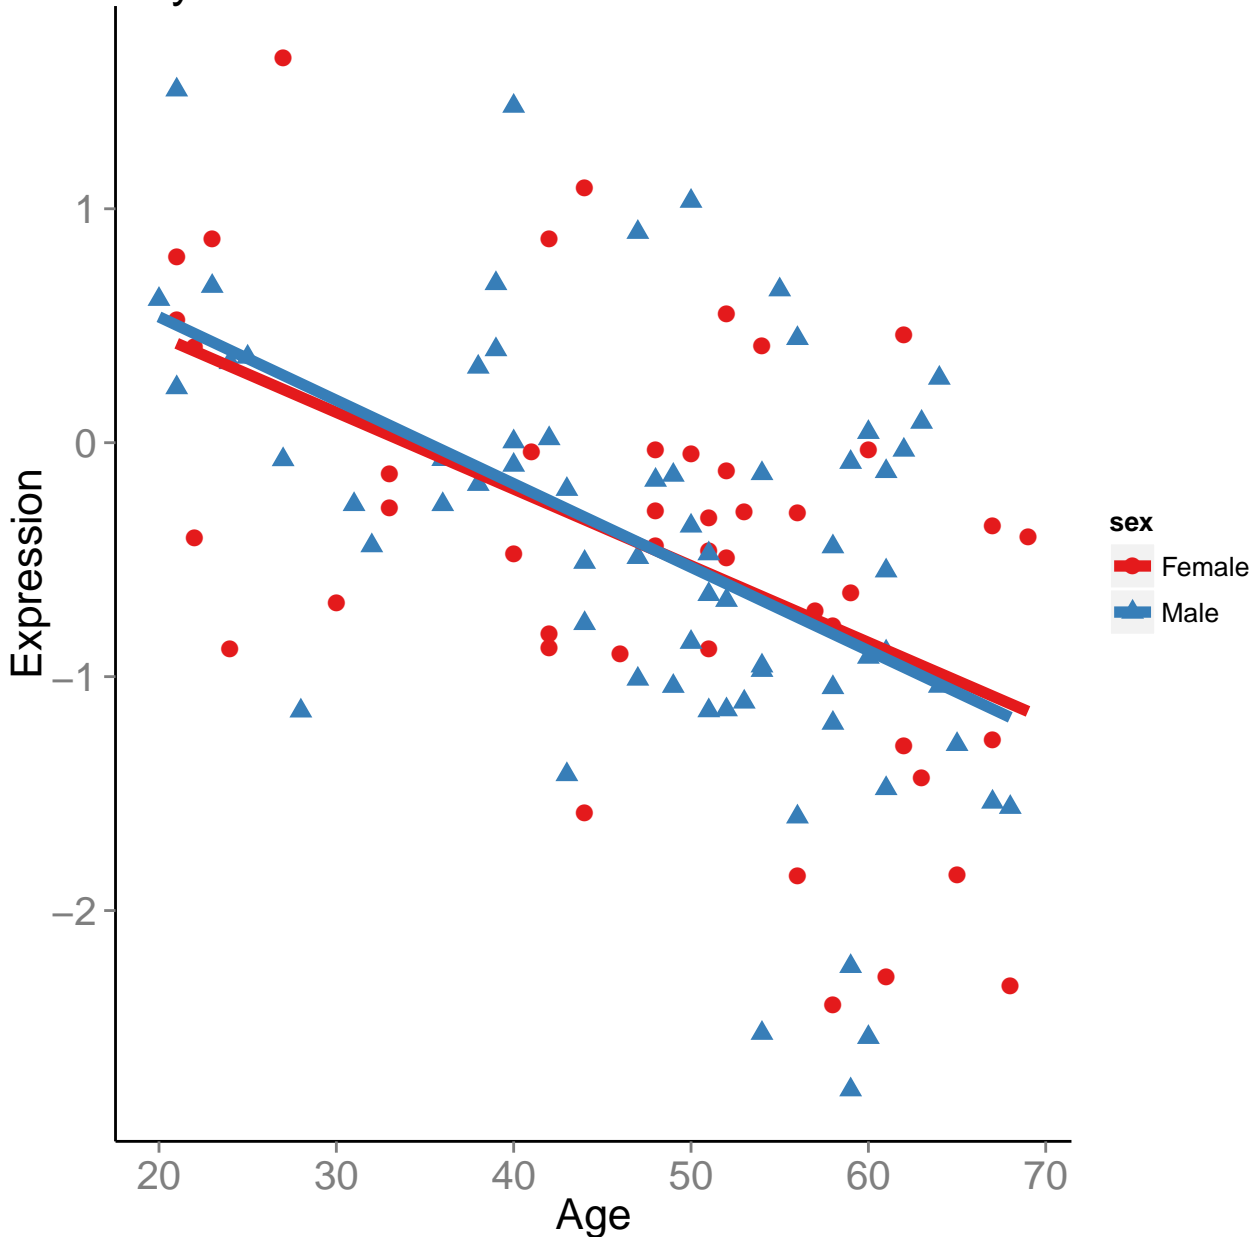

Artery: CDKN2A Pearson-R=0.51 Pval=1.01E-08

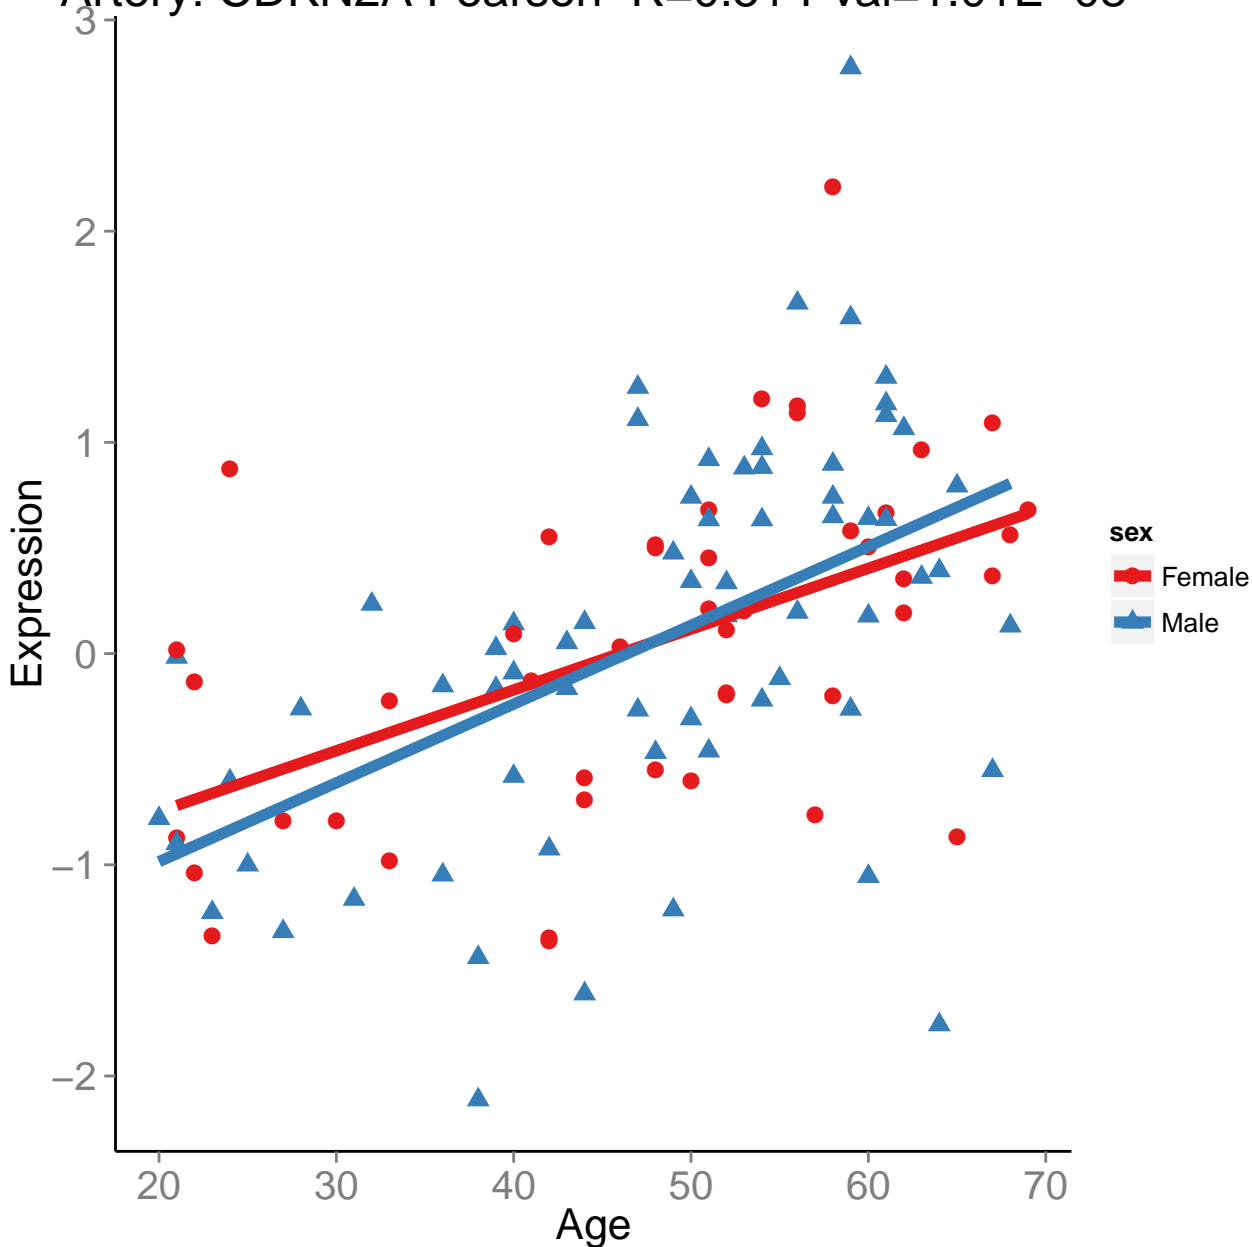

Artery: SCARF2 Pearson-R=0.51 Pval=1.02E-08

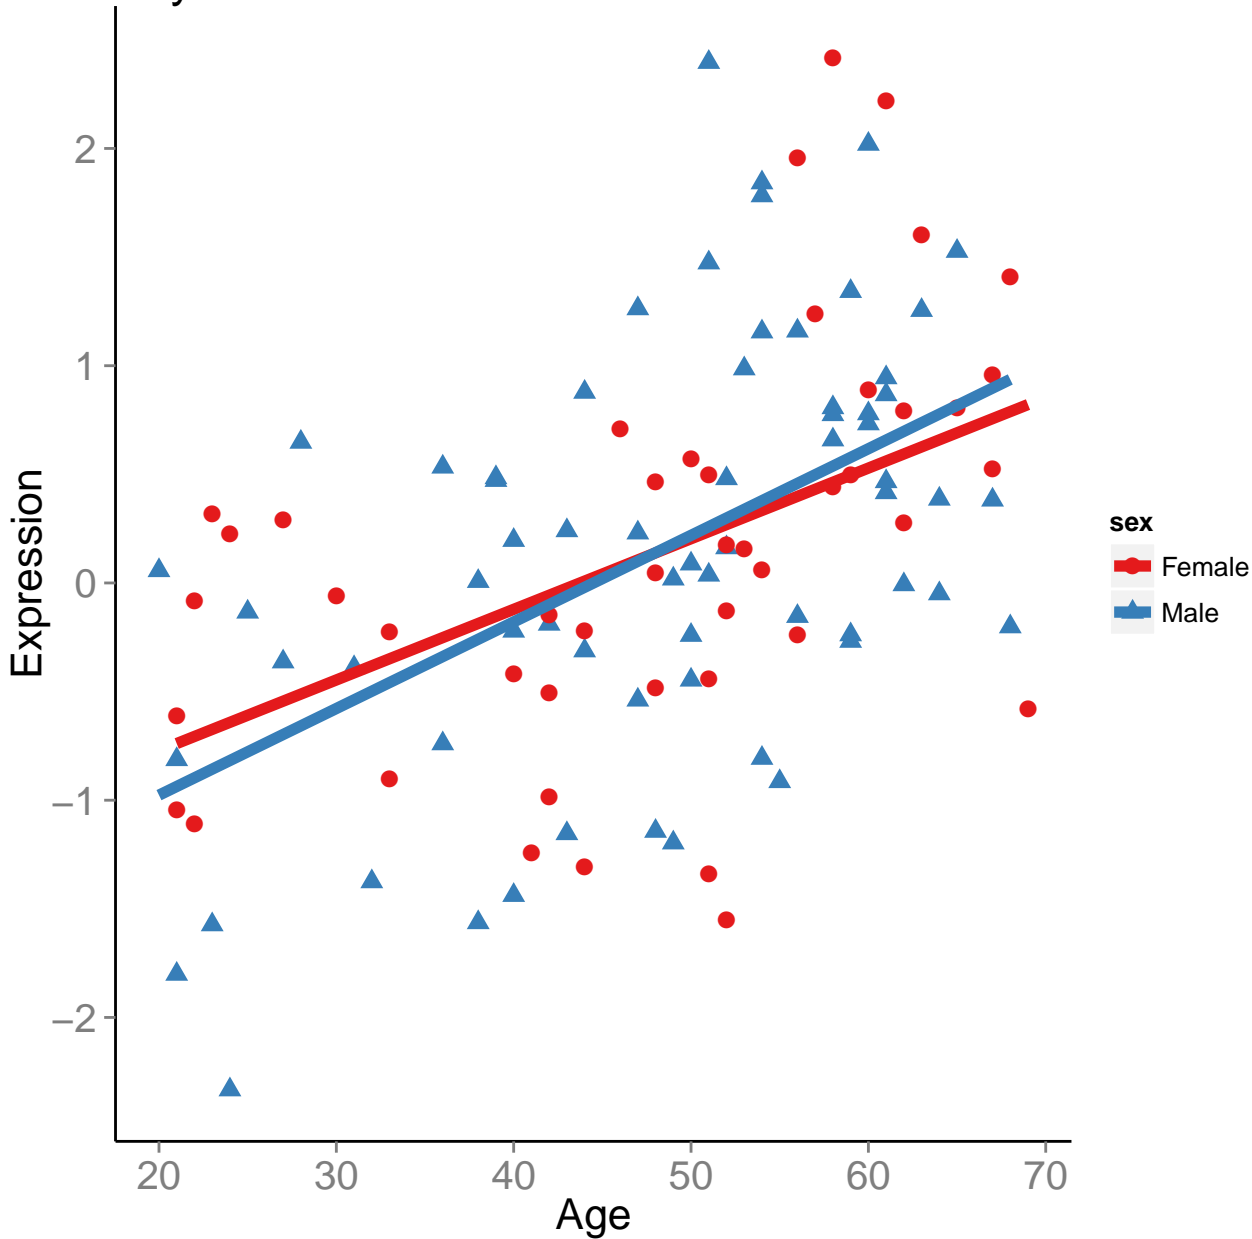

Artery: EVI2A Pearson-R=0.51 Pval=1.06E-08

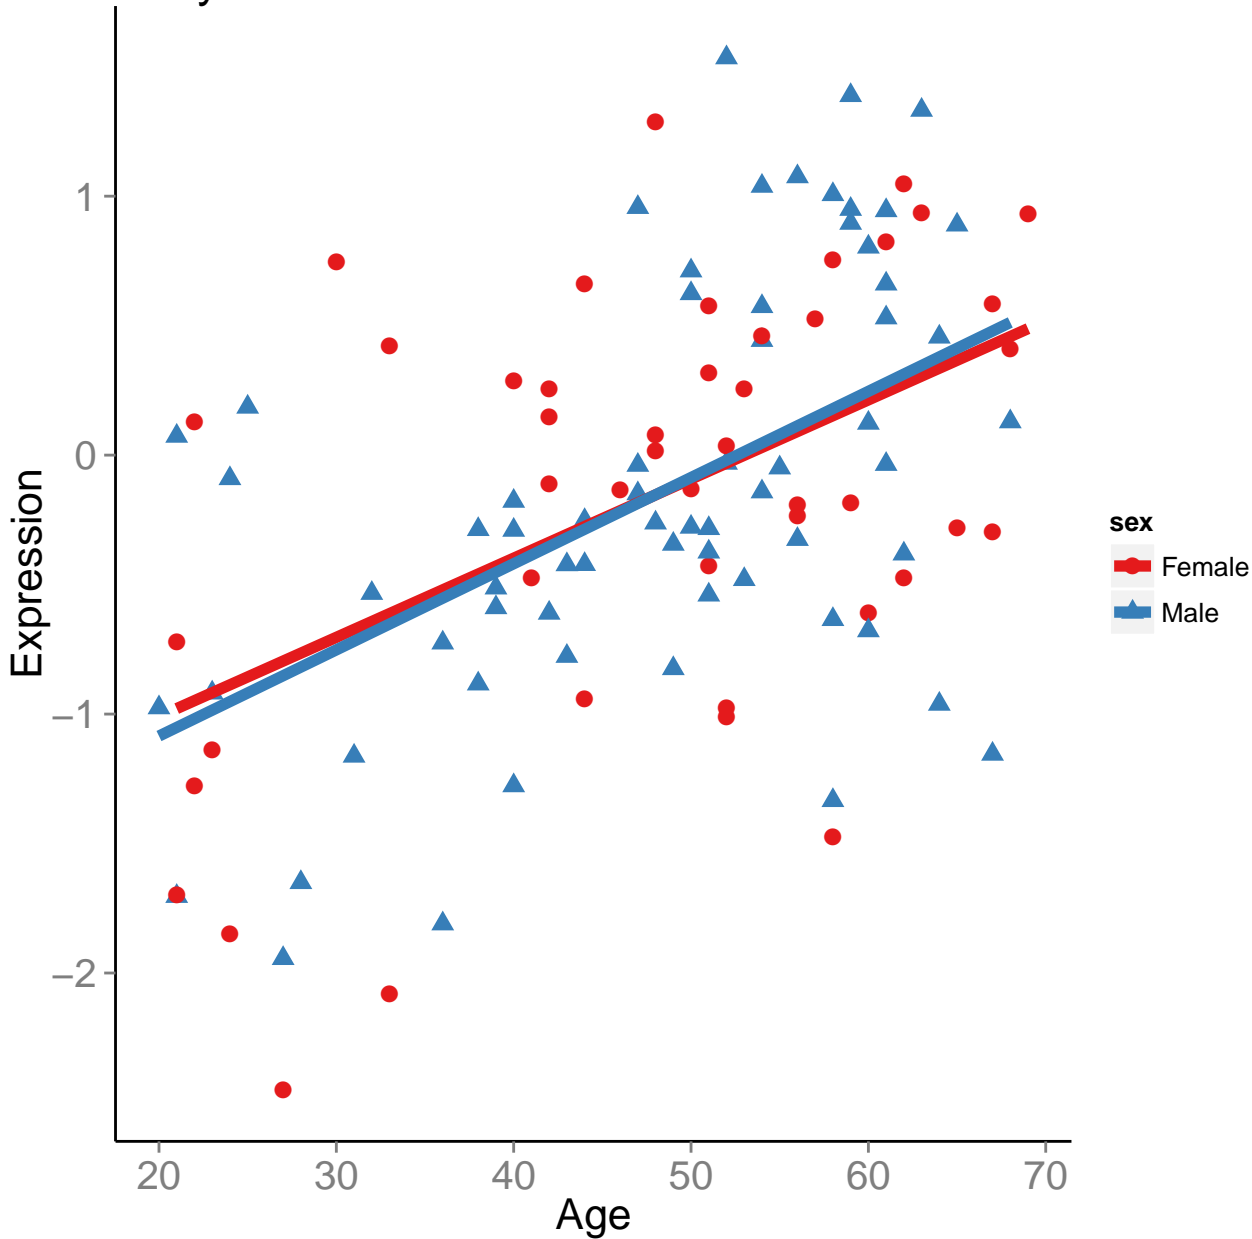

Artery: PSTPIP2 Pearson-R=0.51 Pval=1.12E-08

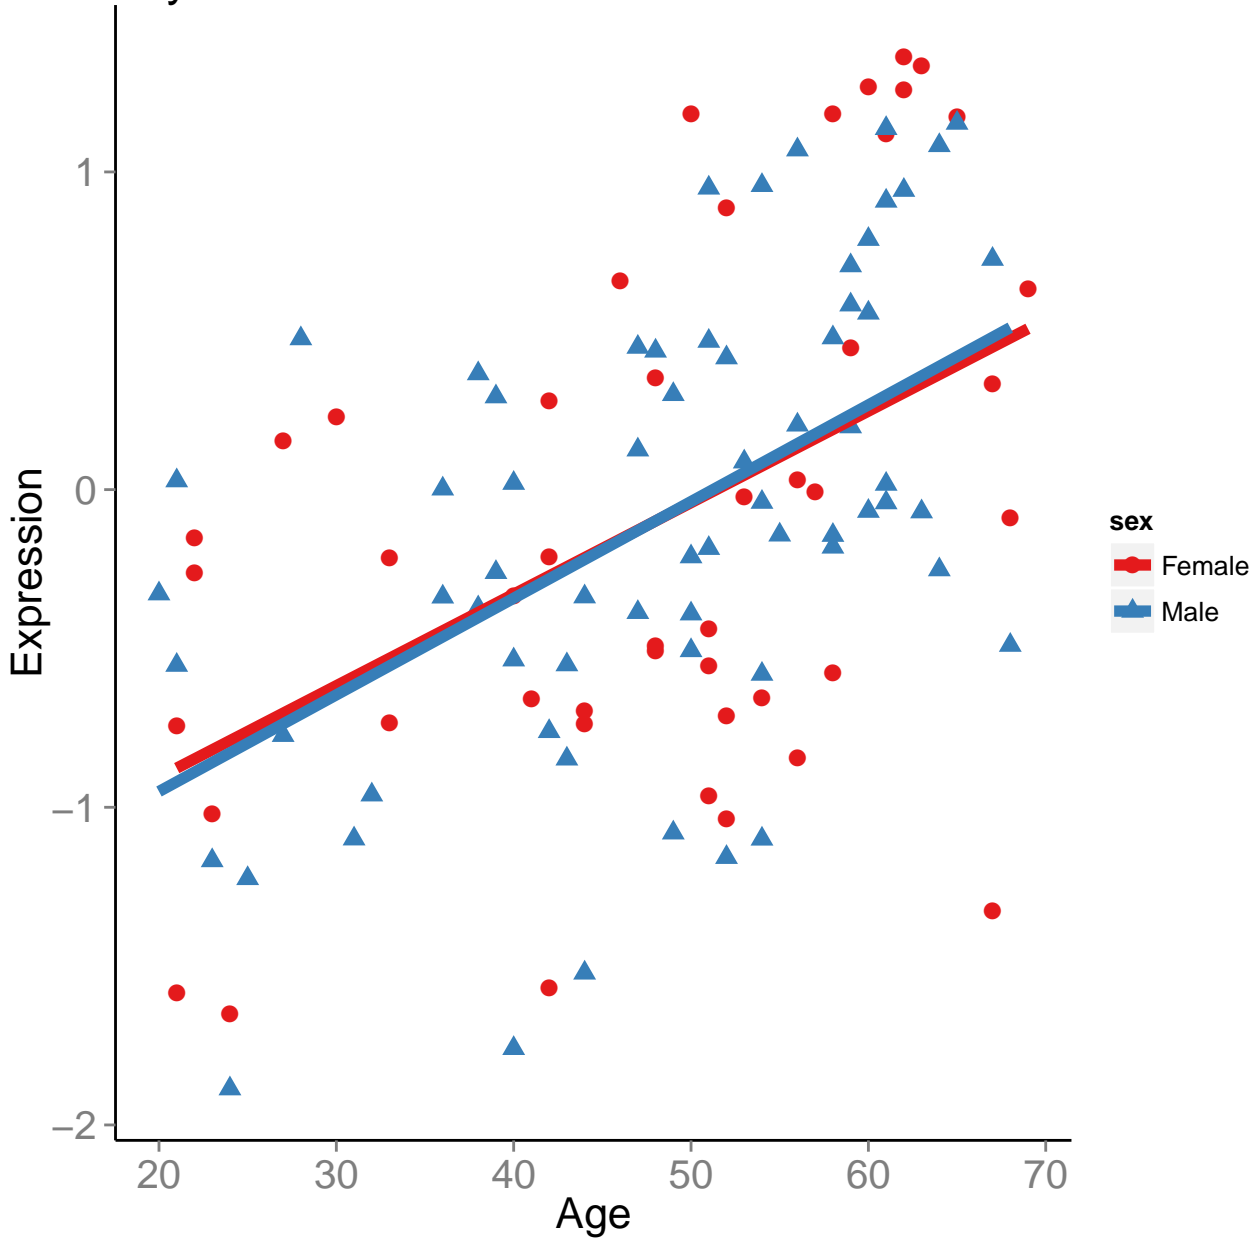

Artery: OSBPL7 Pearson-R=0.51 Pval=1.20E-08

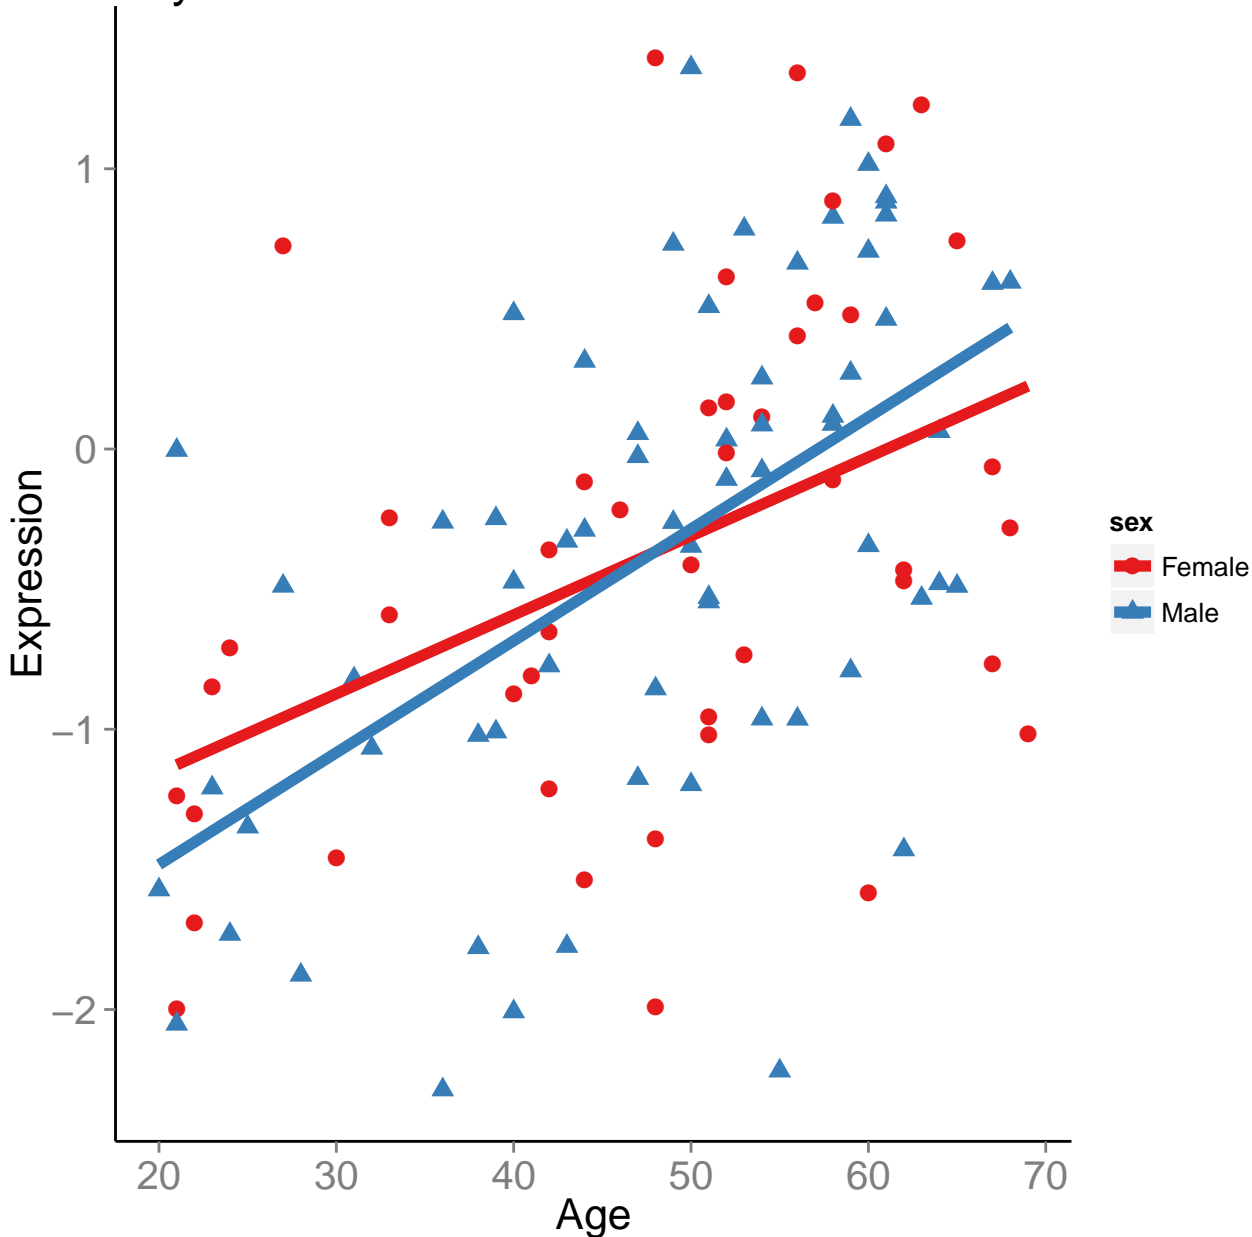

Artery: SFI1 Pearson-R=0.51 Pval=1.23E-08

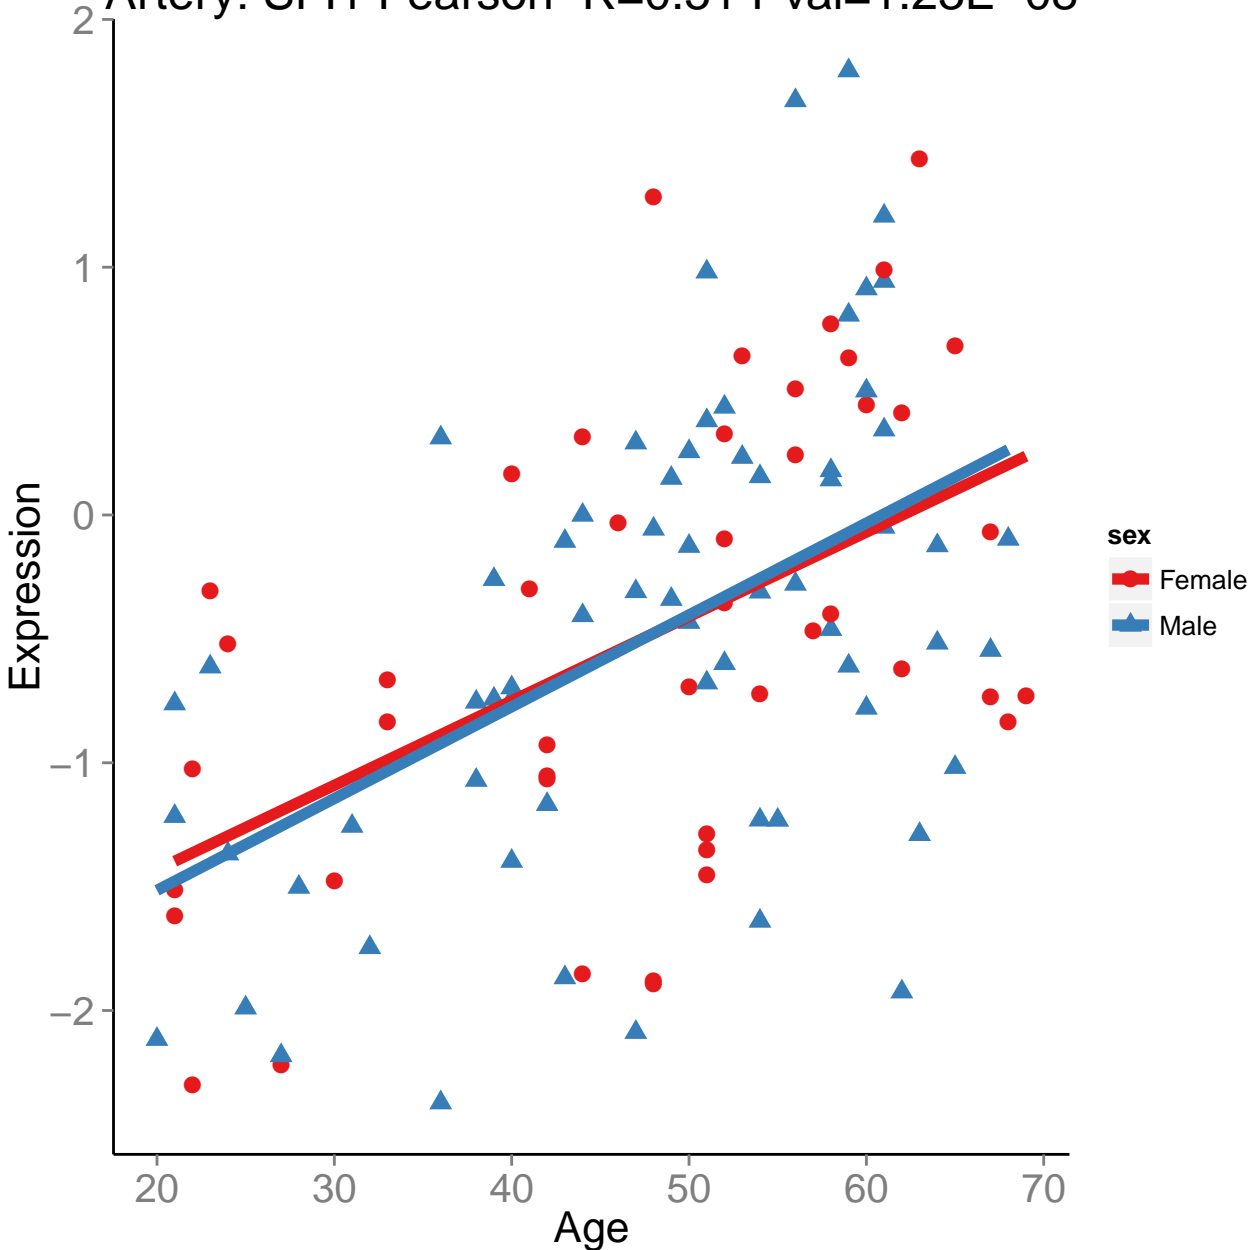

Artery: SPATA18 Pearson-R=0.51 Pval=1.26E-08

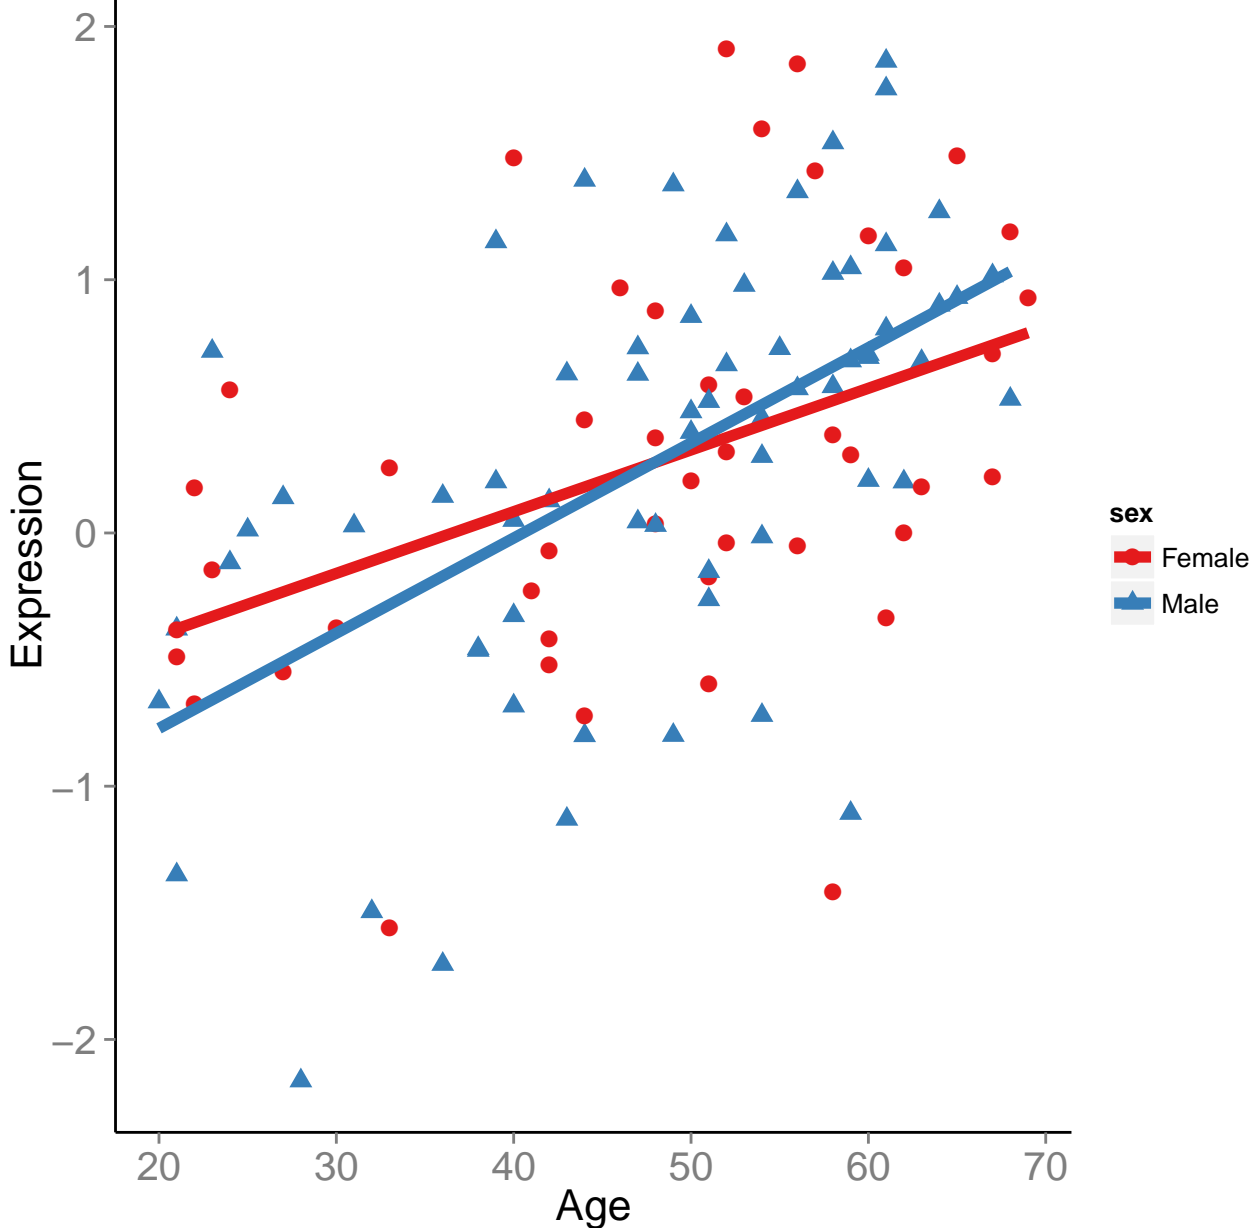



Artery: SETD7 Pearson-R=-0.51 Pval=1.32E-08

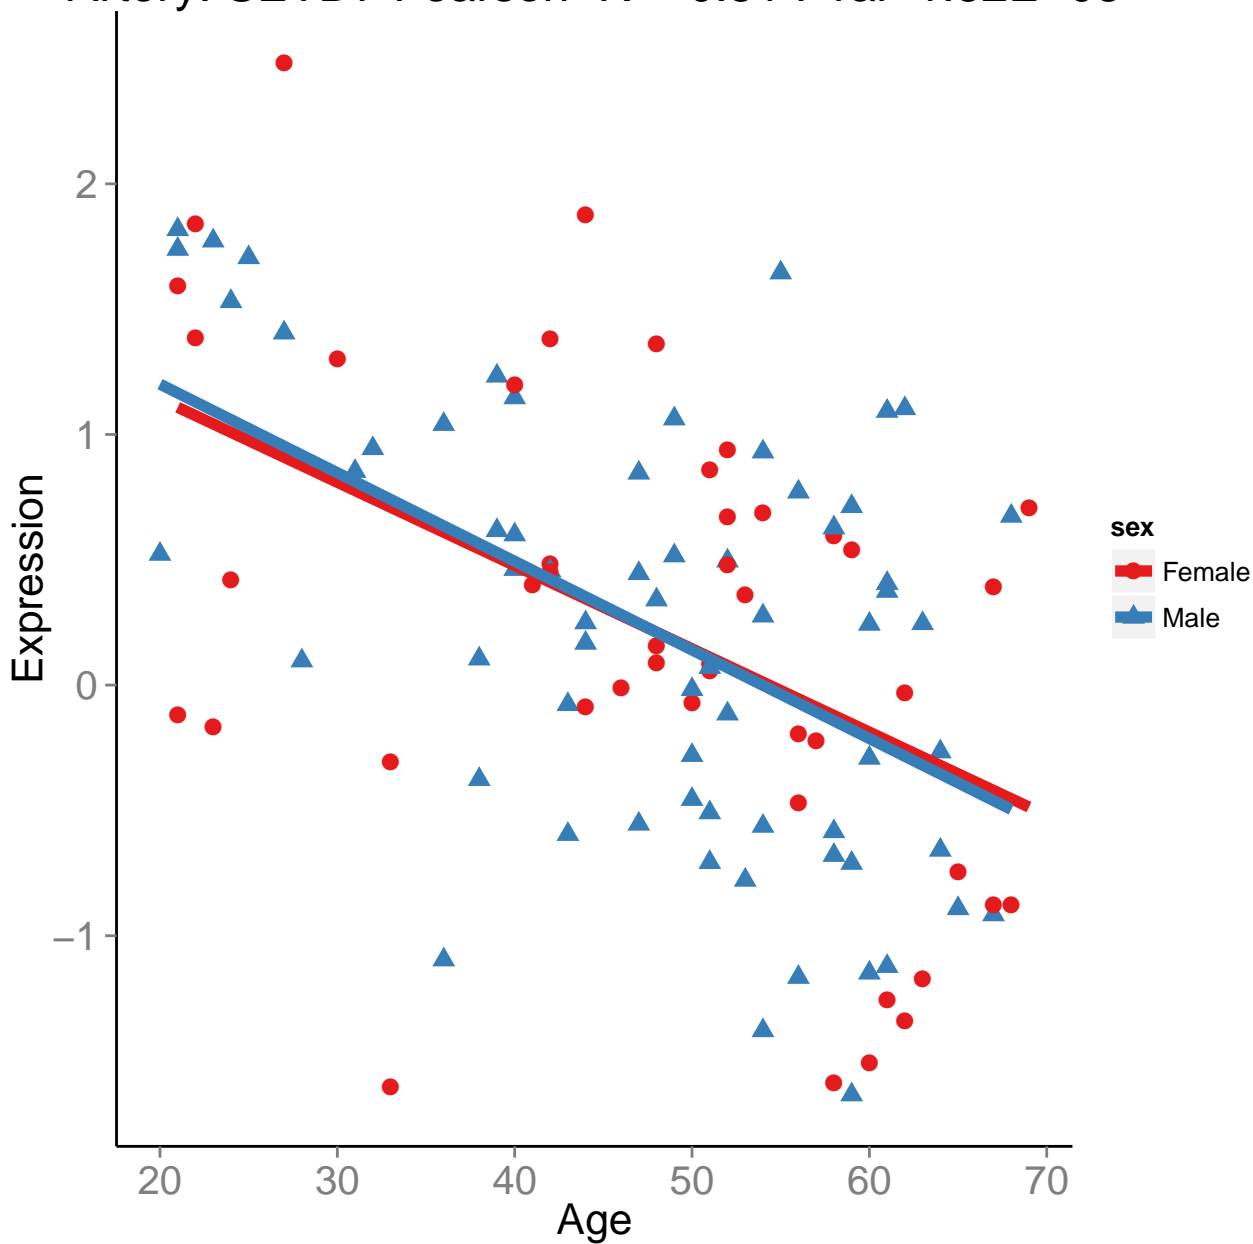

Artery: CENPT Pearson-R=0.50 Pval=1.41E-08

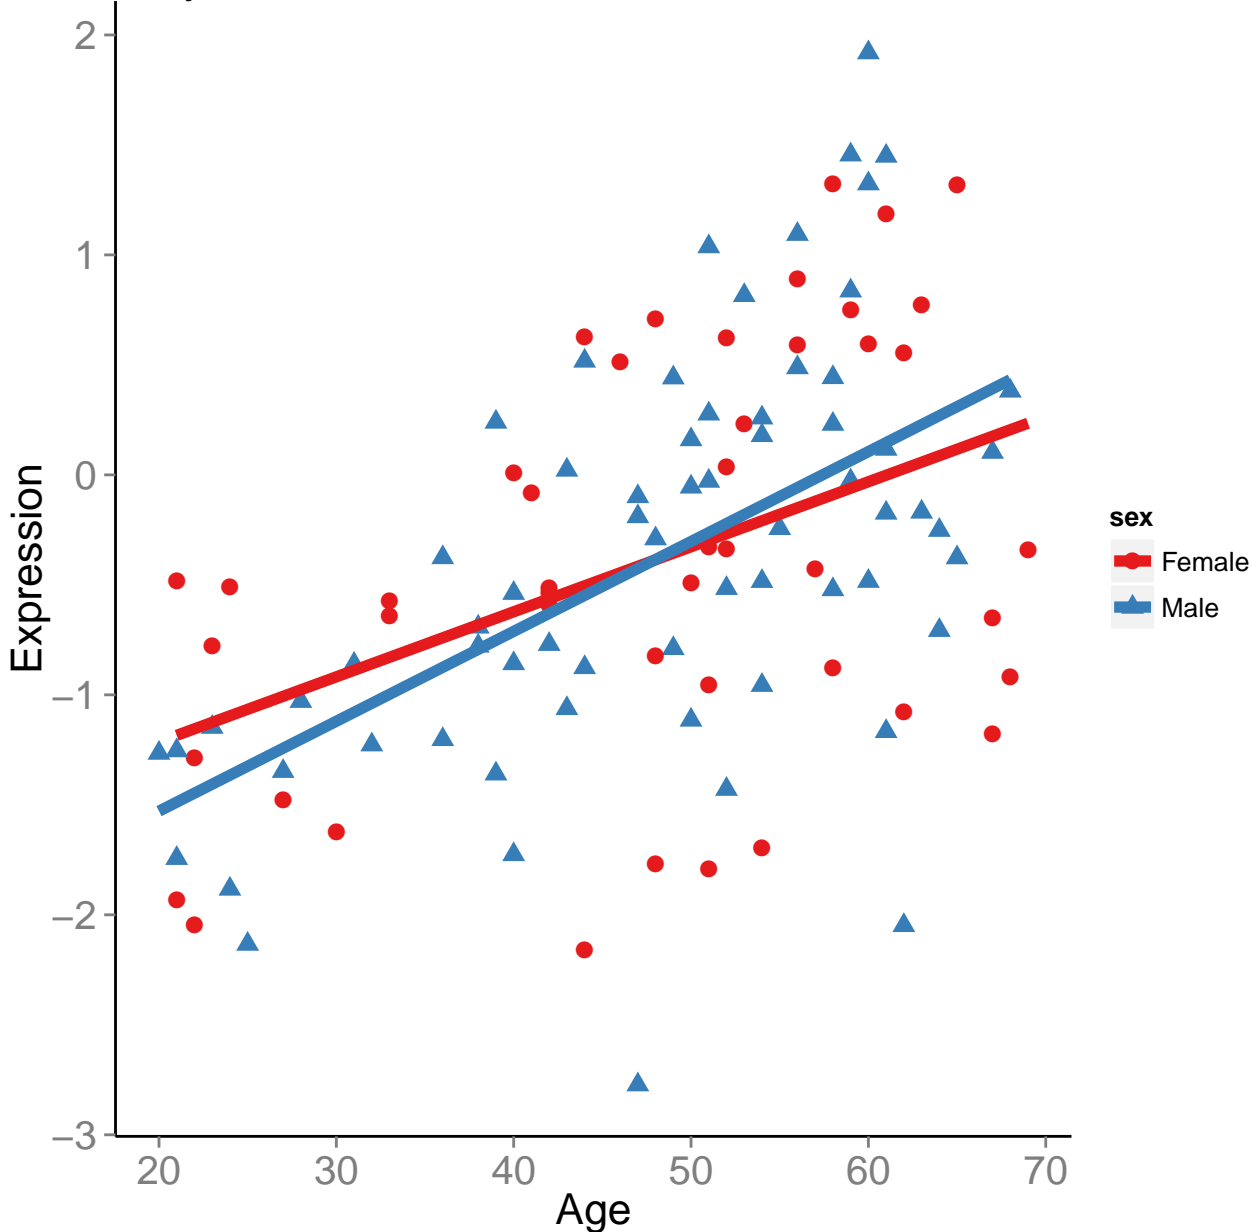

Artery: PHKA2 Pearson-R=0.50 Pval=1.41E-08

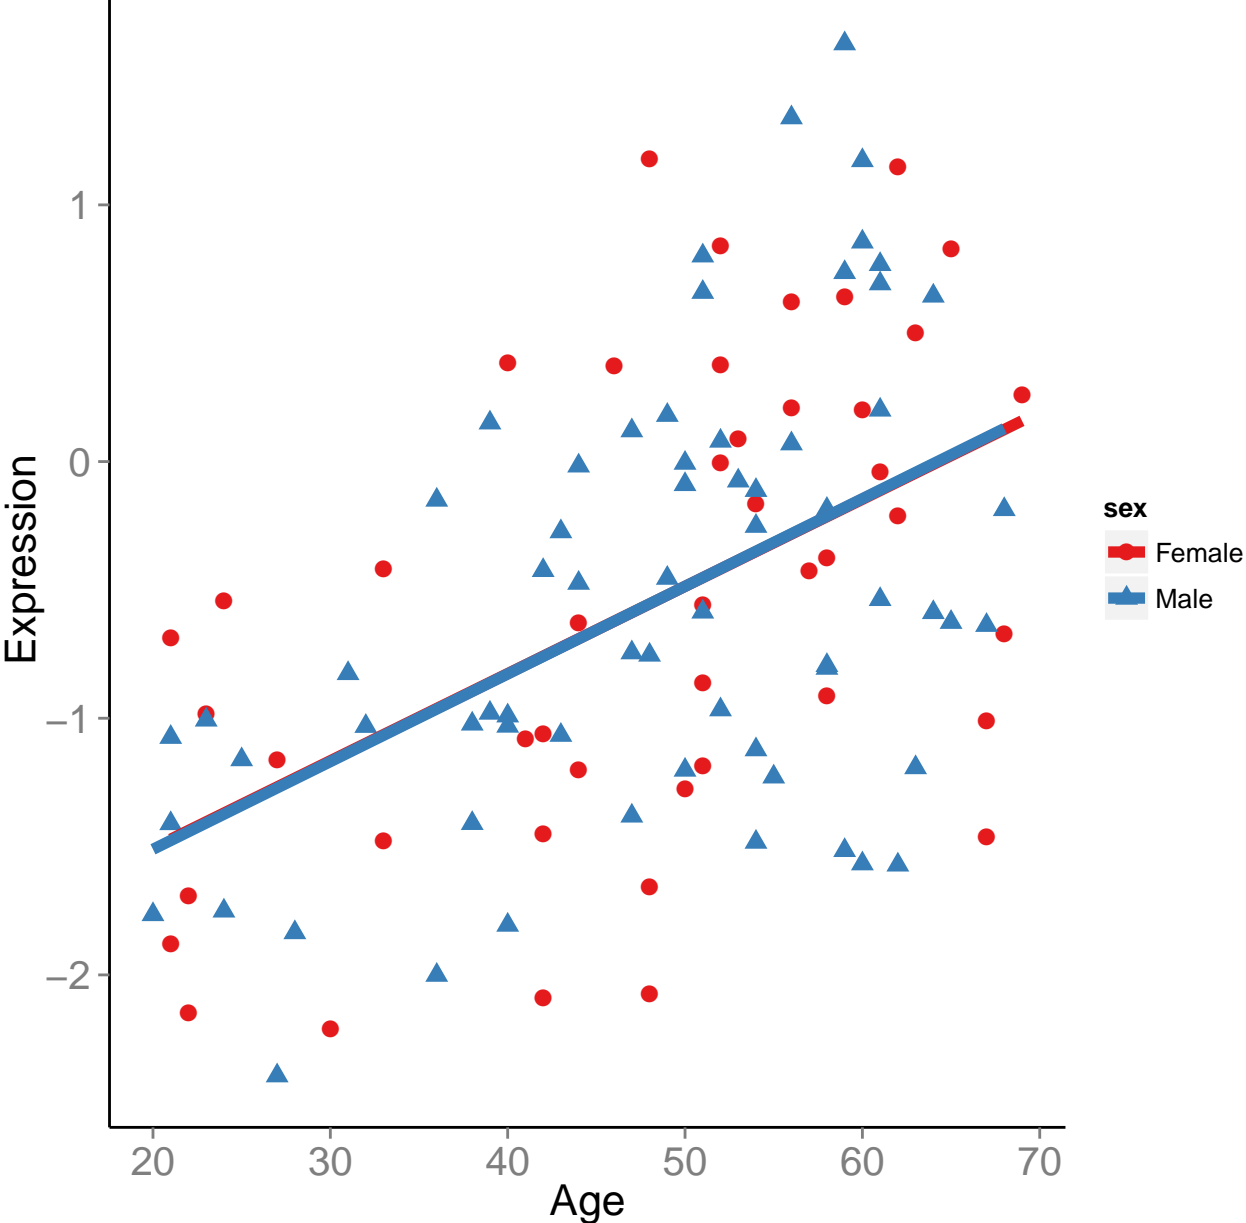

Artery: XRCC3 Pearson-R=0.50 Pval=1.45E-08

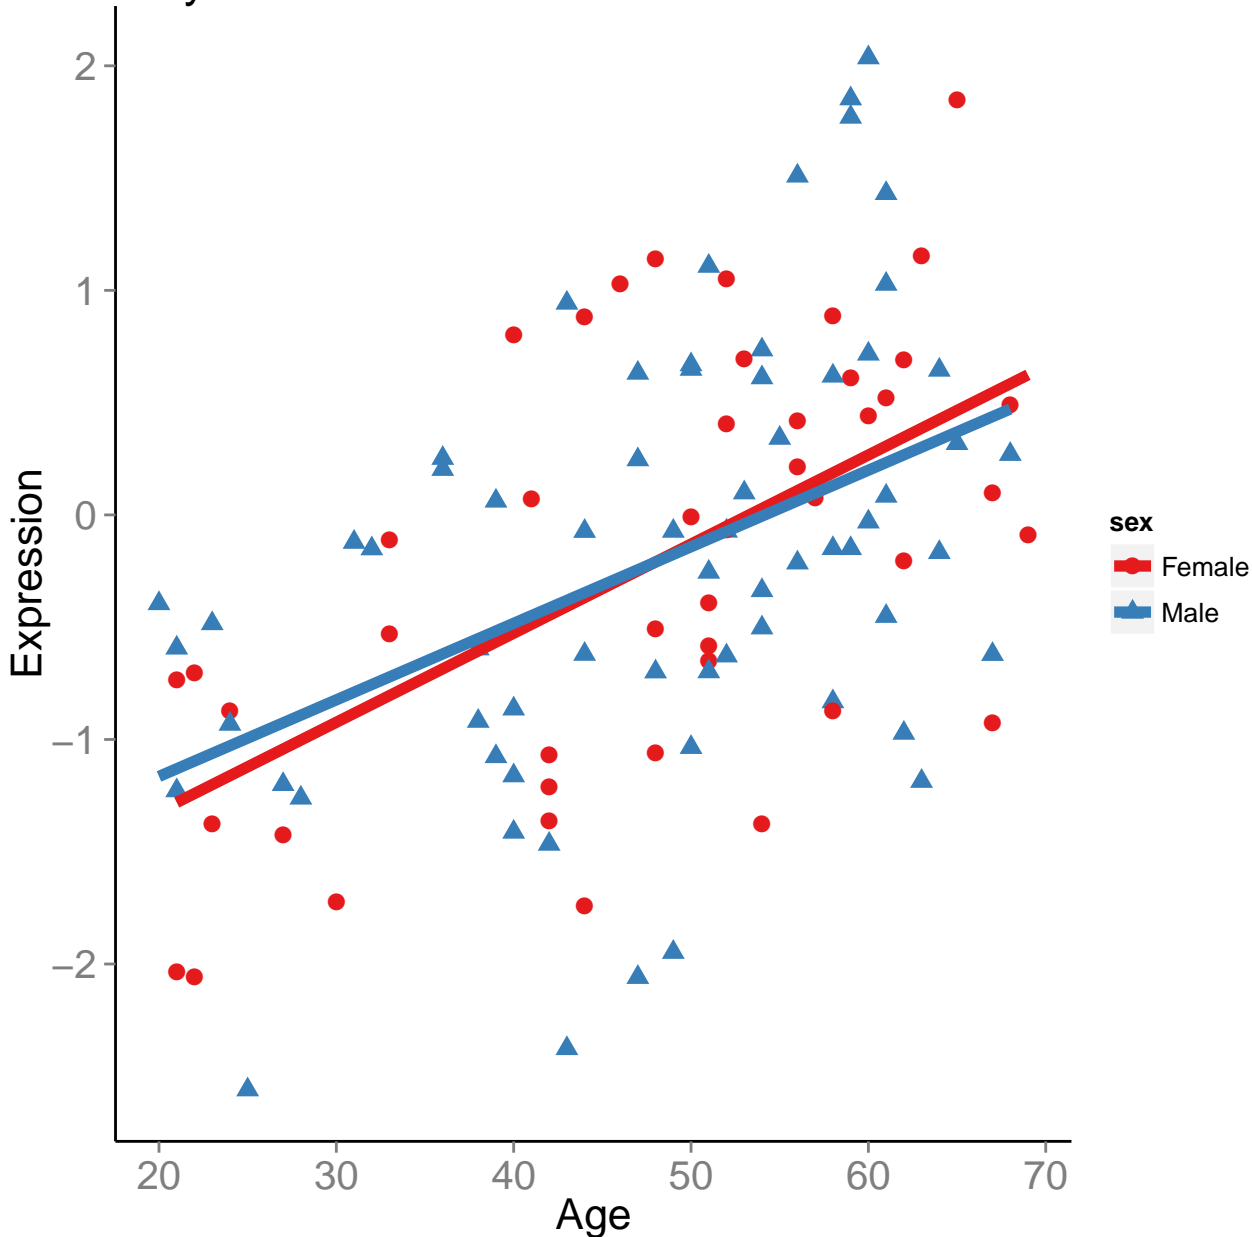

Artery: GDI1 Pearson-R=0.50 Pval=1.54E-08

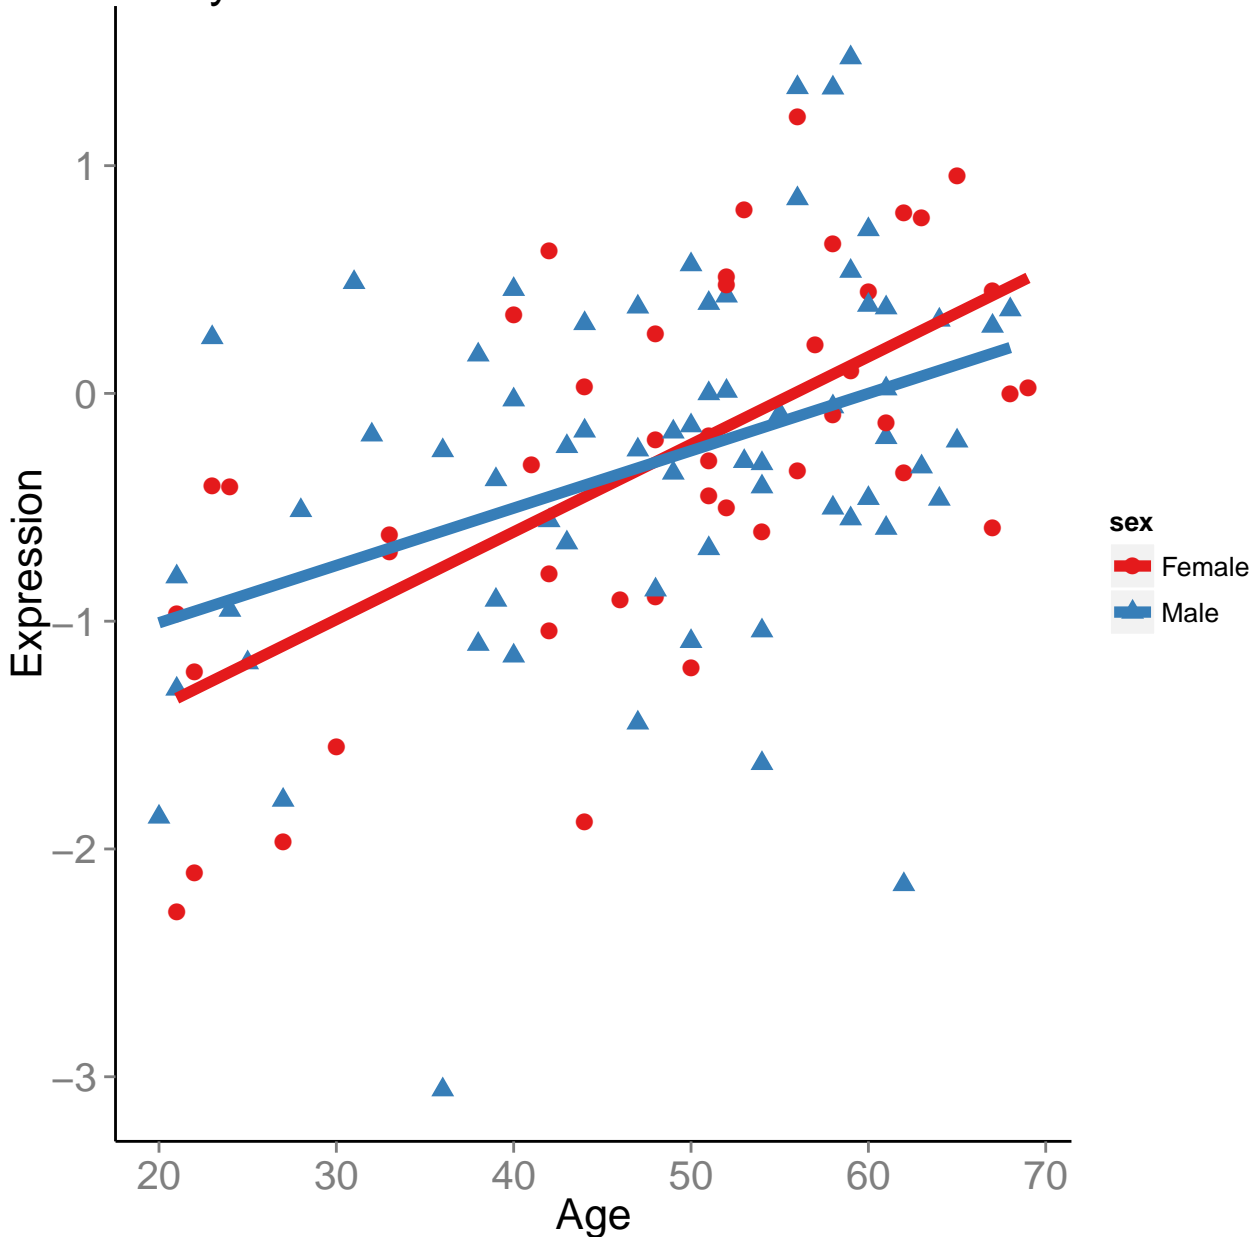

Artery: ZFYVE27 Pearson-R=0.50 Pval=1.56E-08

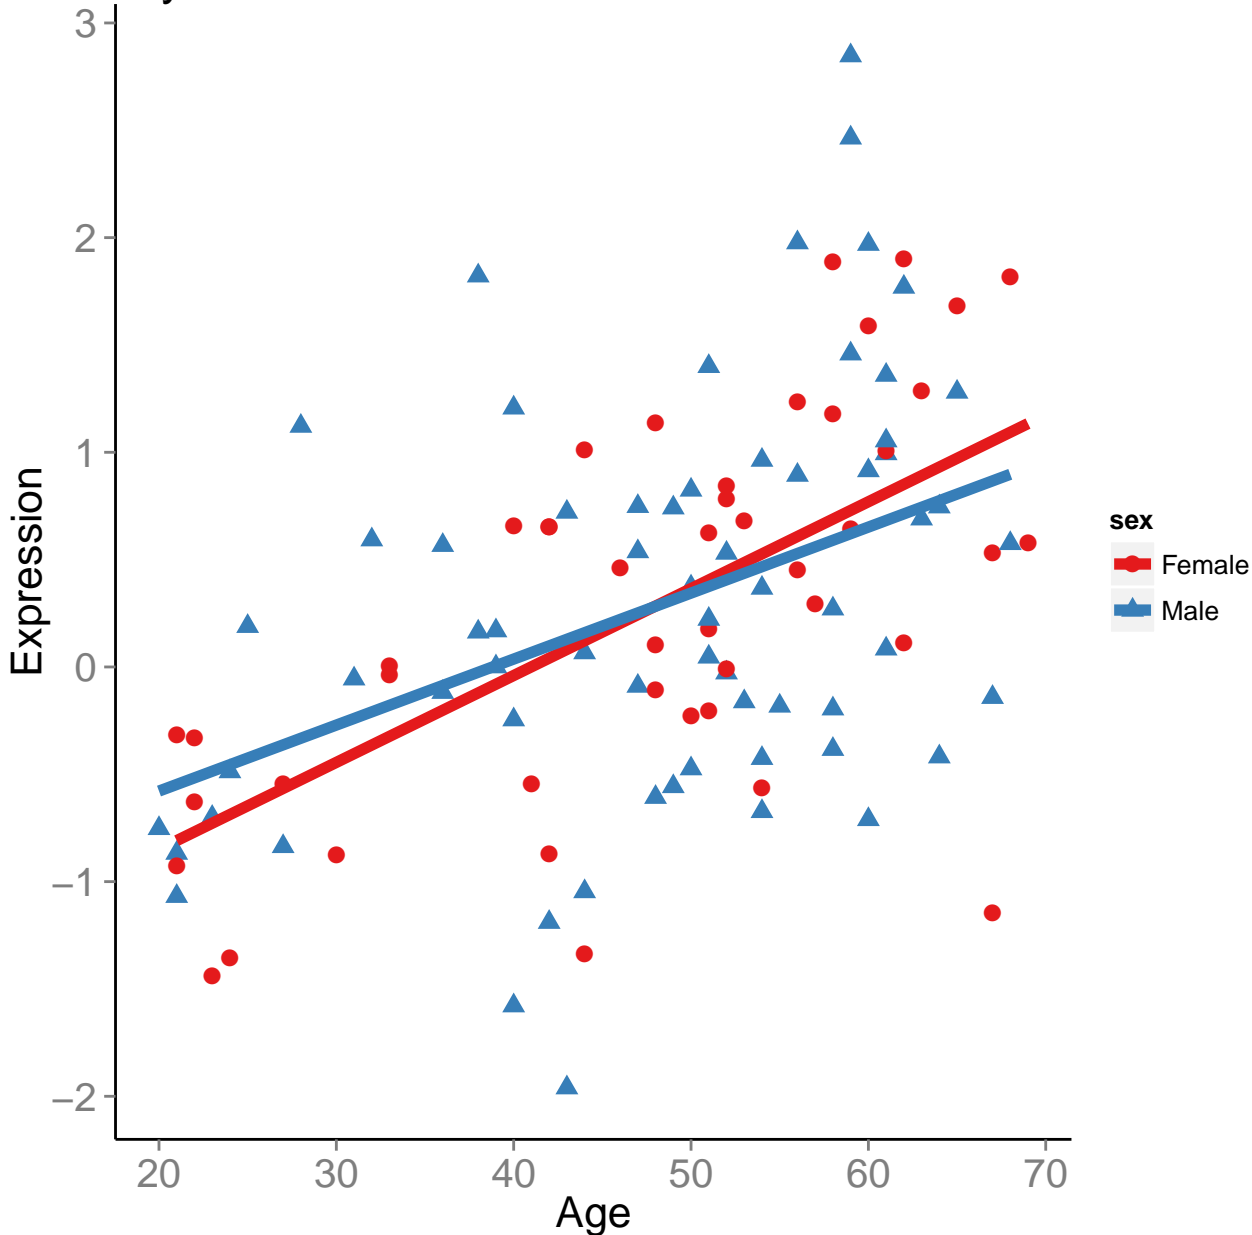

Artery: IRF3 Pearson-R=0.50 Pval=1.63E-08

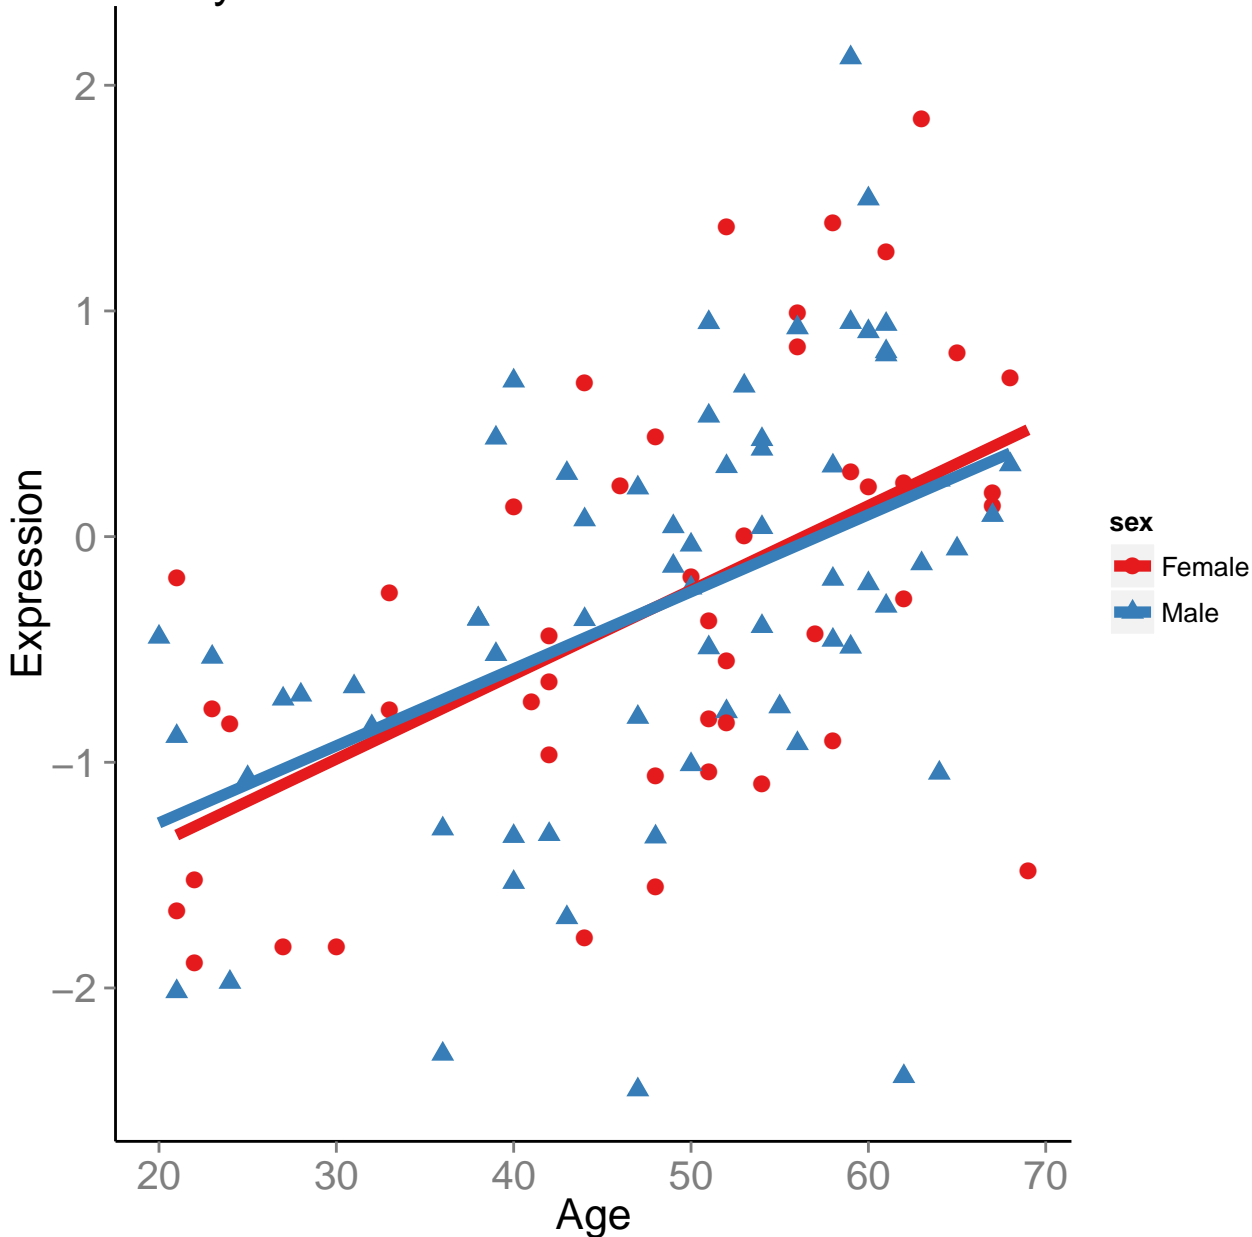

Artery: RP11-709B3.2 Pearson-R=0.50 Pval=1.63E-08

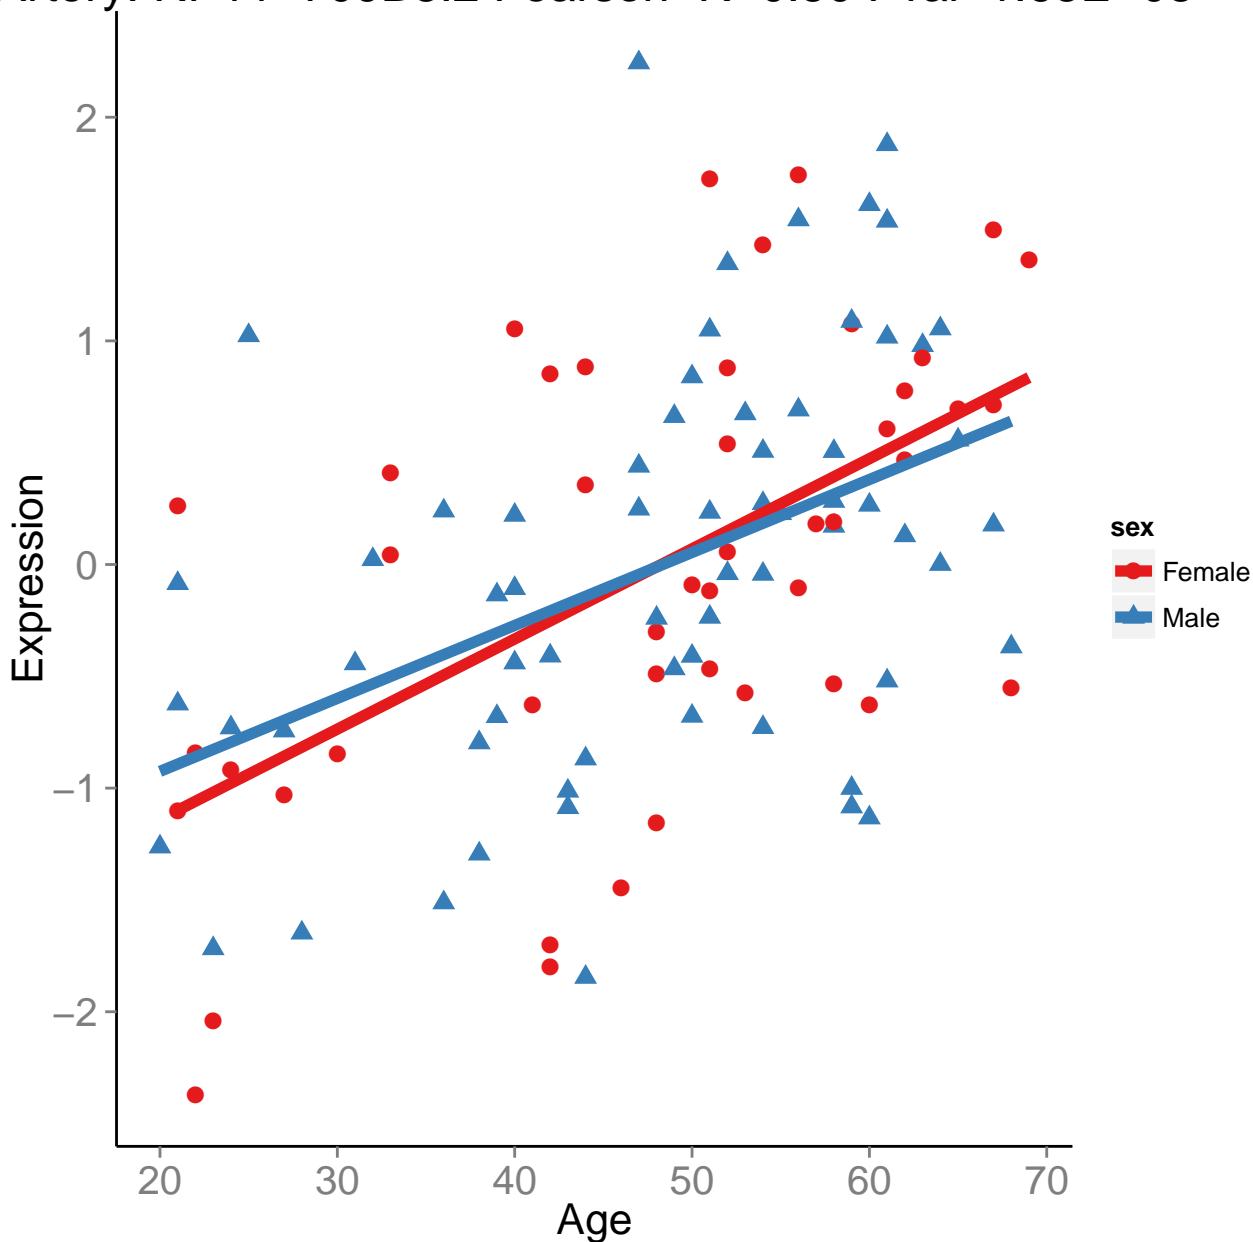



Artery: HMHA1 Pearson-R=0.50 Pval=1.67E-08

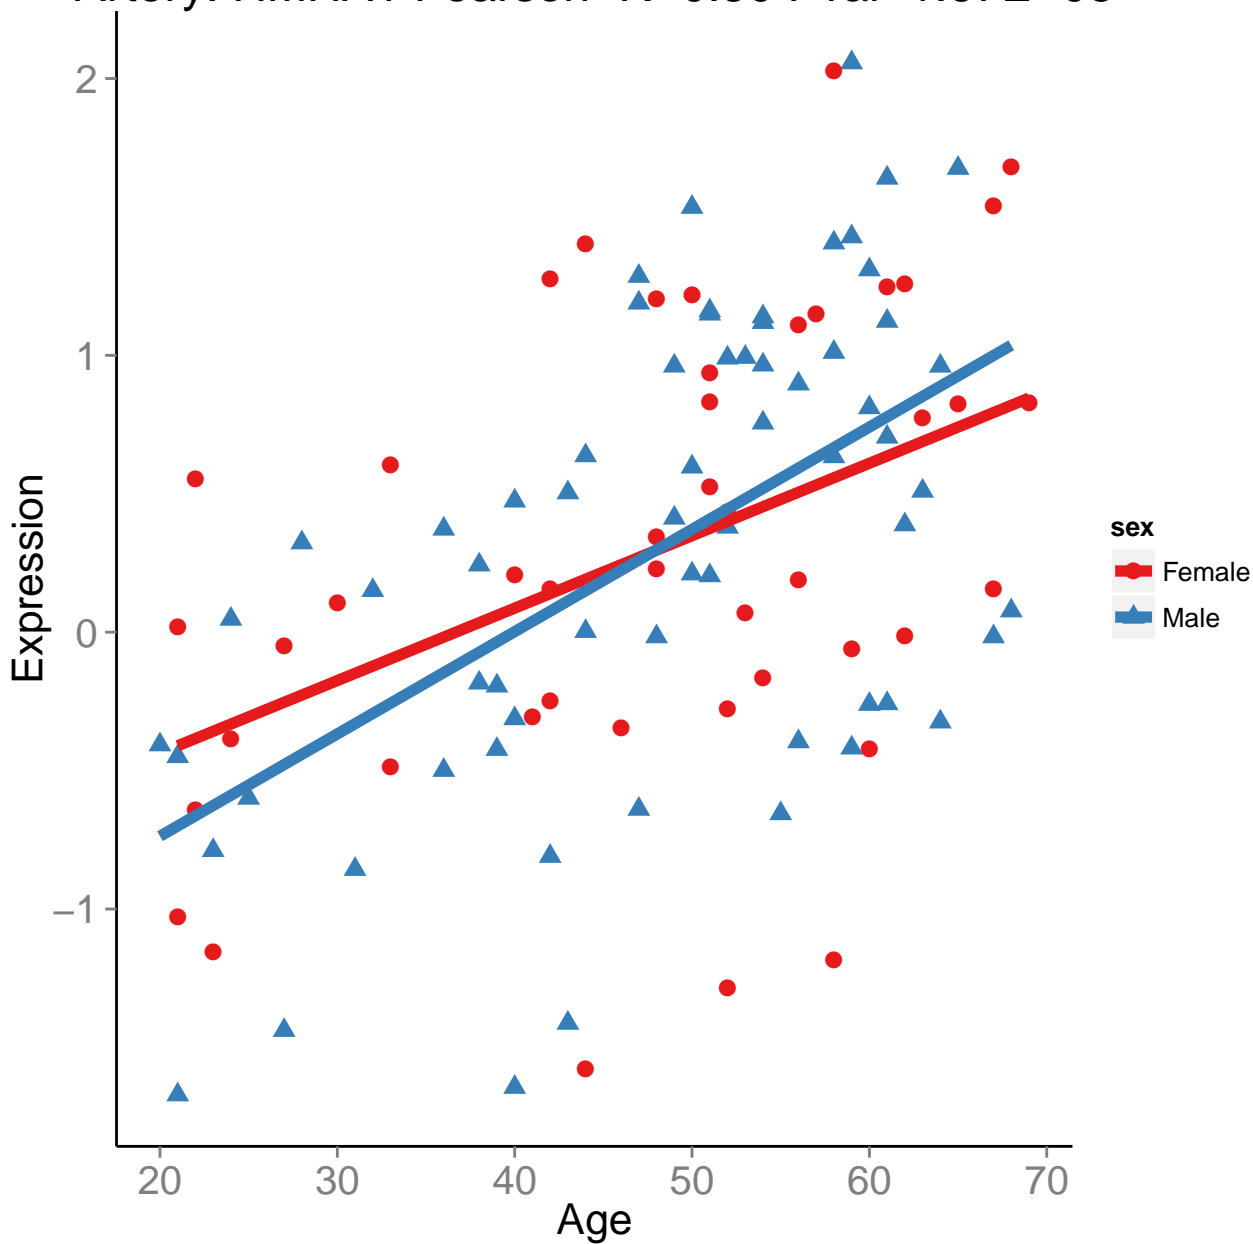

Artery: RNF215 Pearson-R=0.50 Pval=1.80E-08

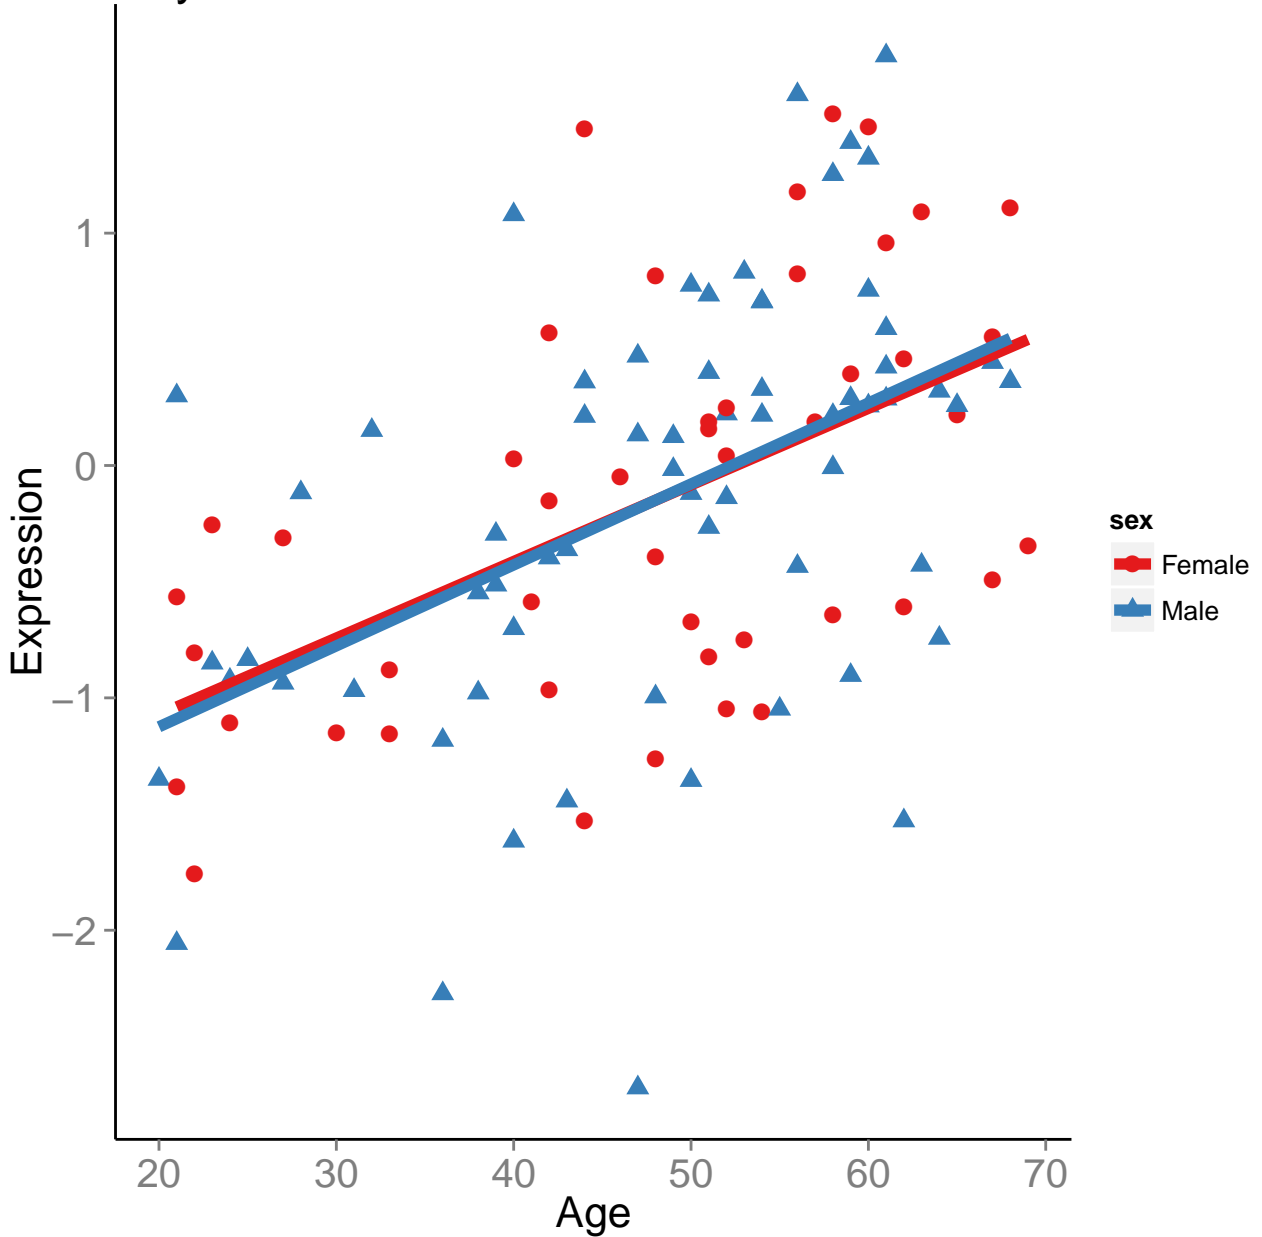

Artery: MAN2C1 Pearson-R=0.50 Pval=2.07E-08

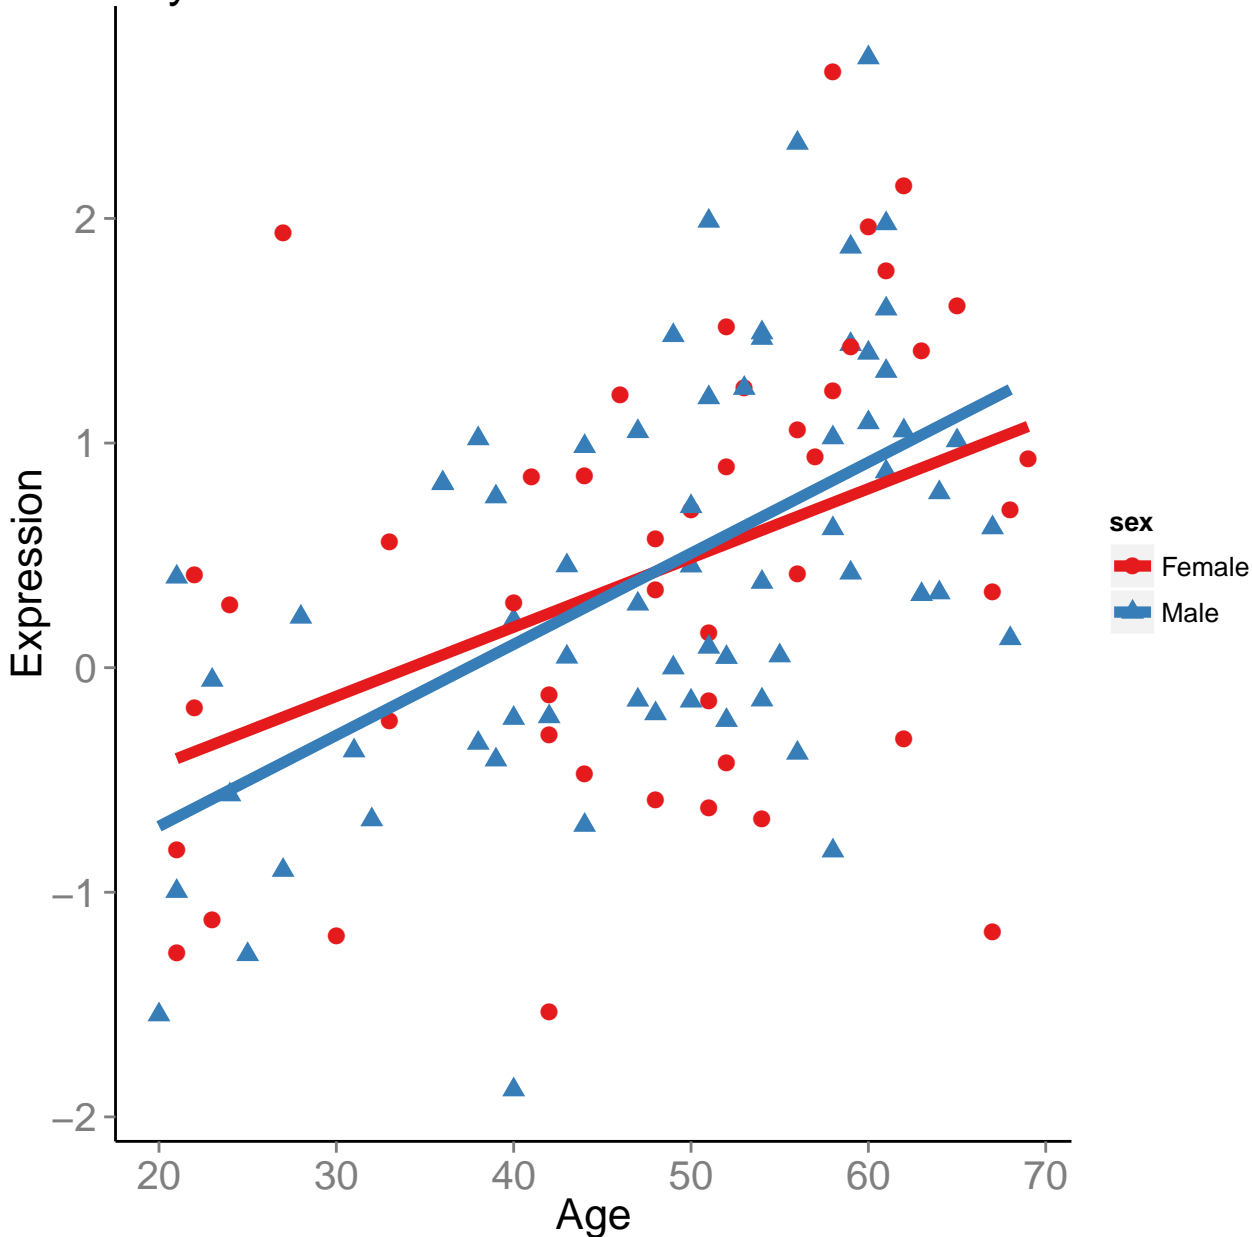

Artery: CD8A Pearson-R=0.50 Pval=2.00E-08

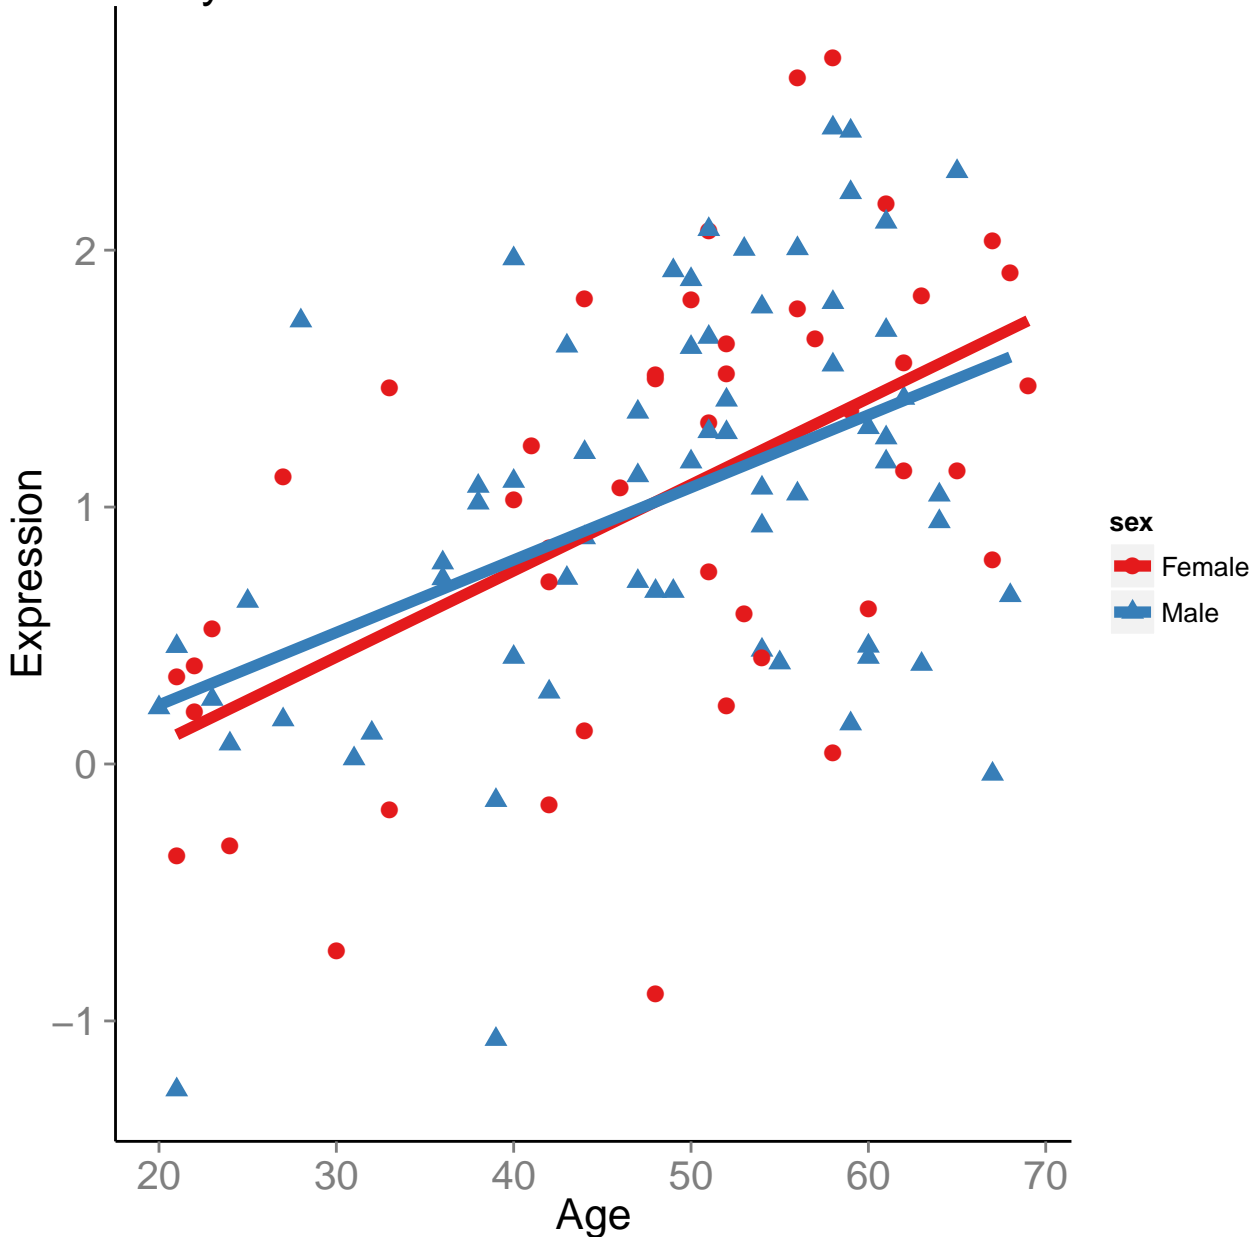

Artery: TRESX2 Pearson-R=0.50 Pval=2.11E-08

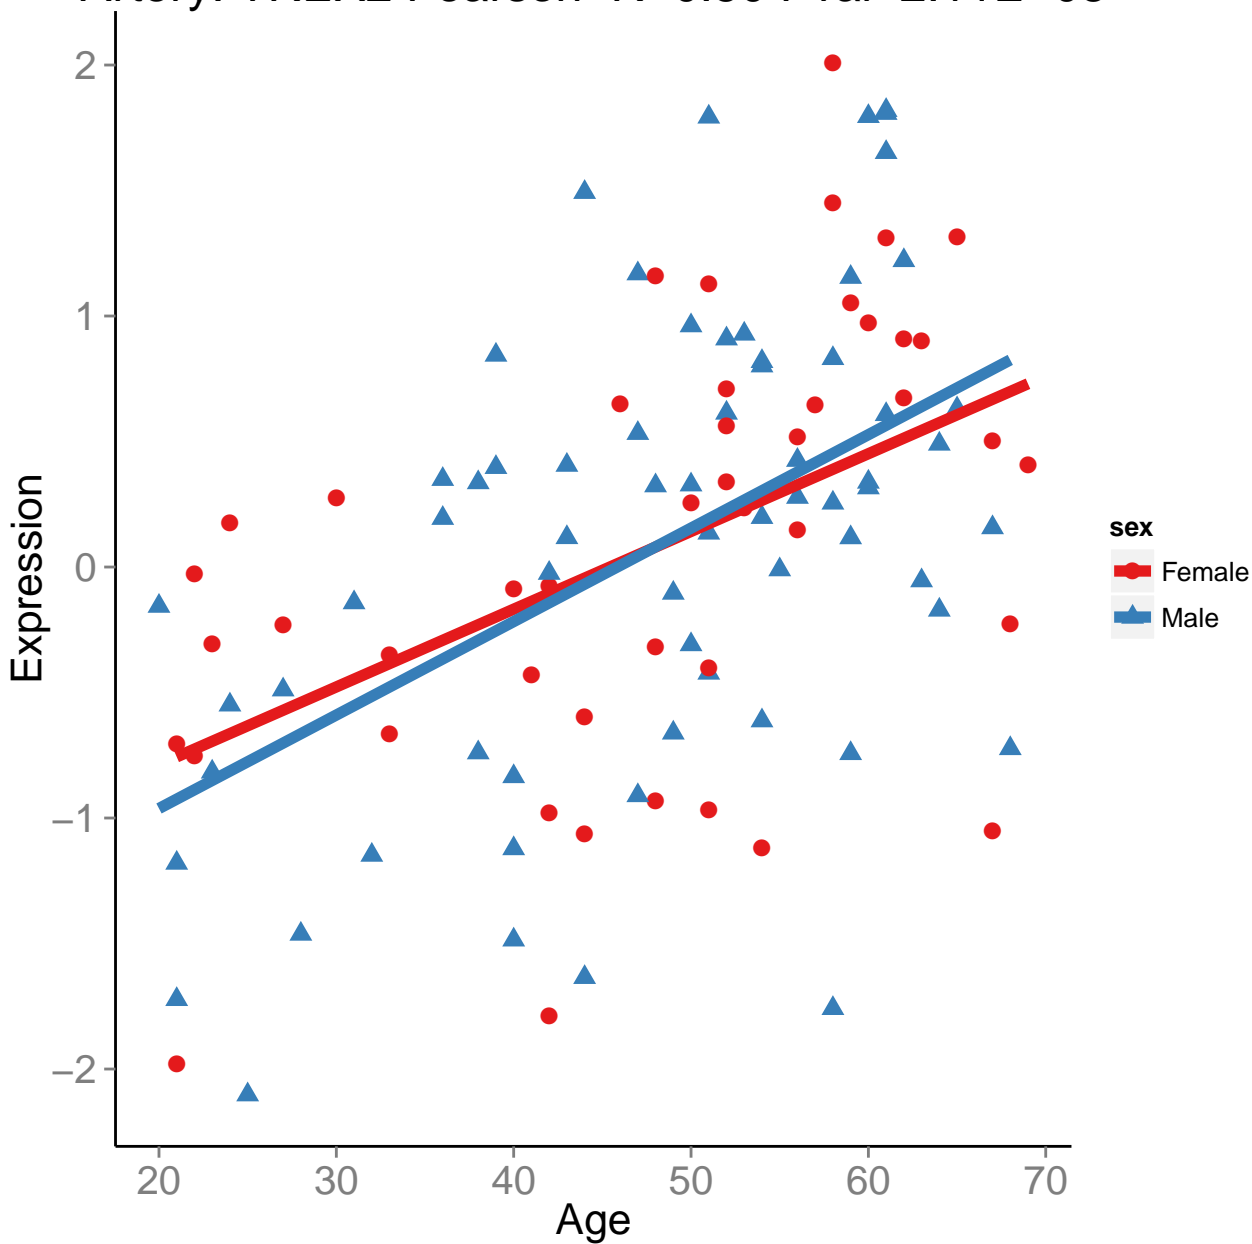

Artery: ME3 Pearson-R=0.50 Pval=2.06E-08

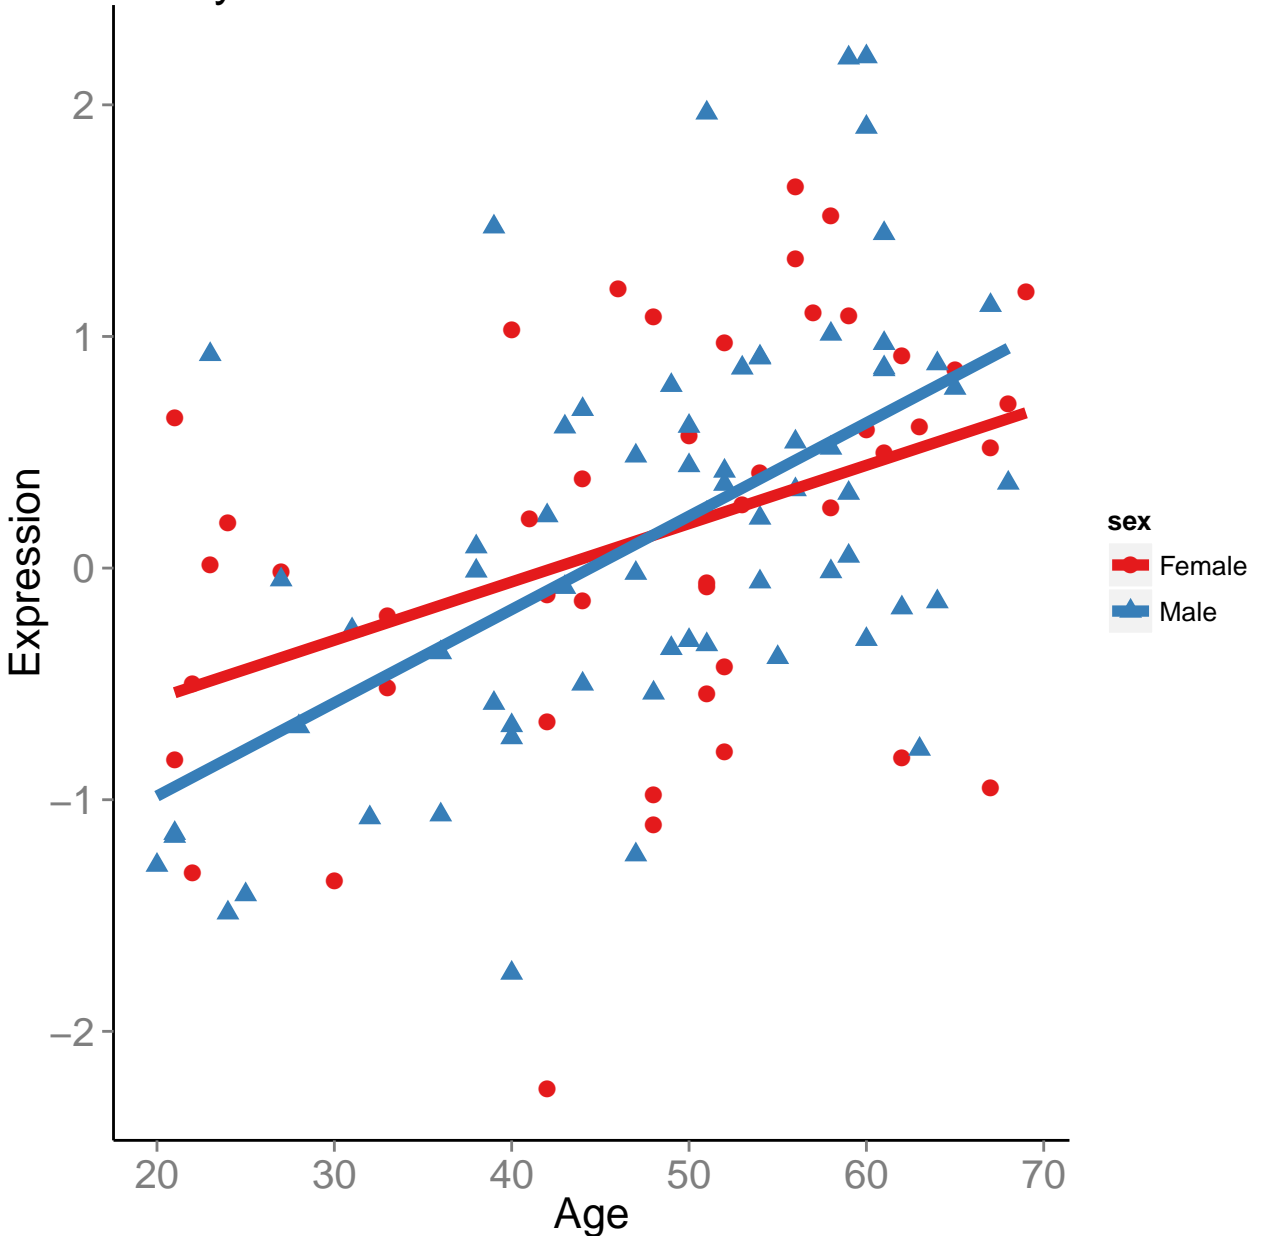

Artery: GYG1 Pearson-R=-0.50 Pval=2.06E-08

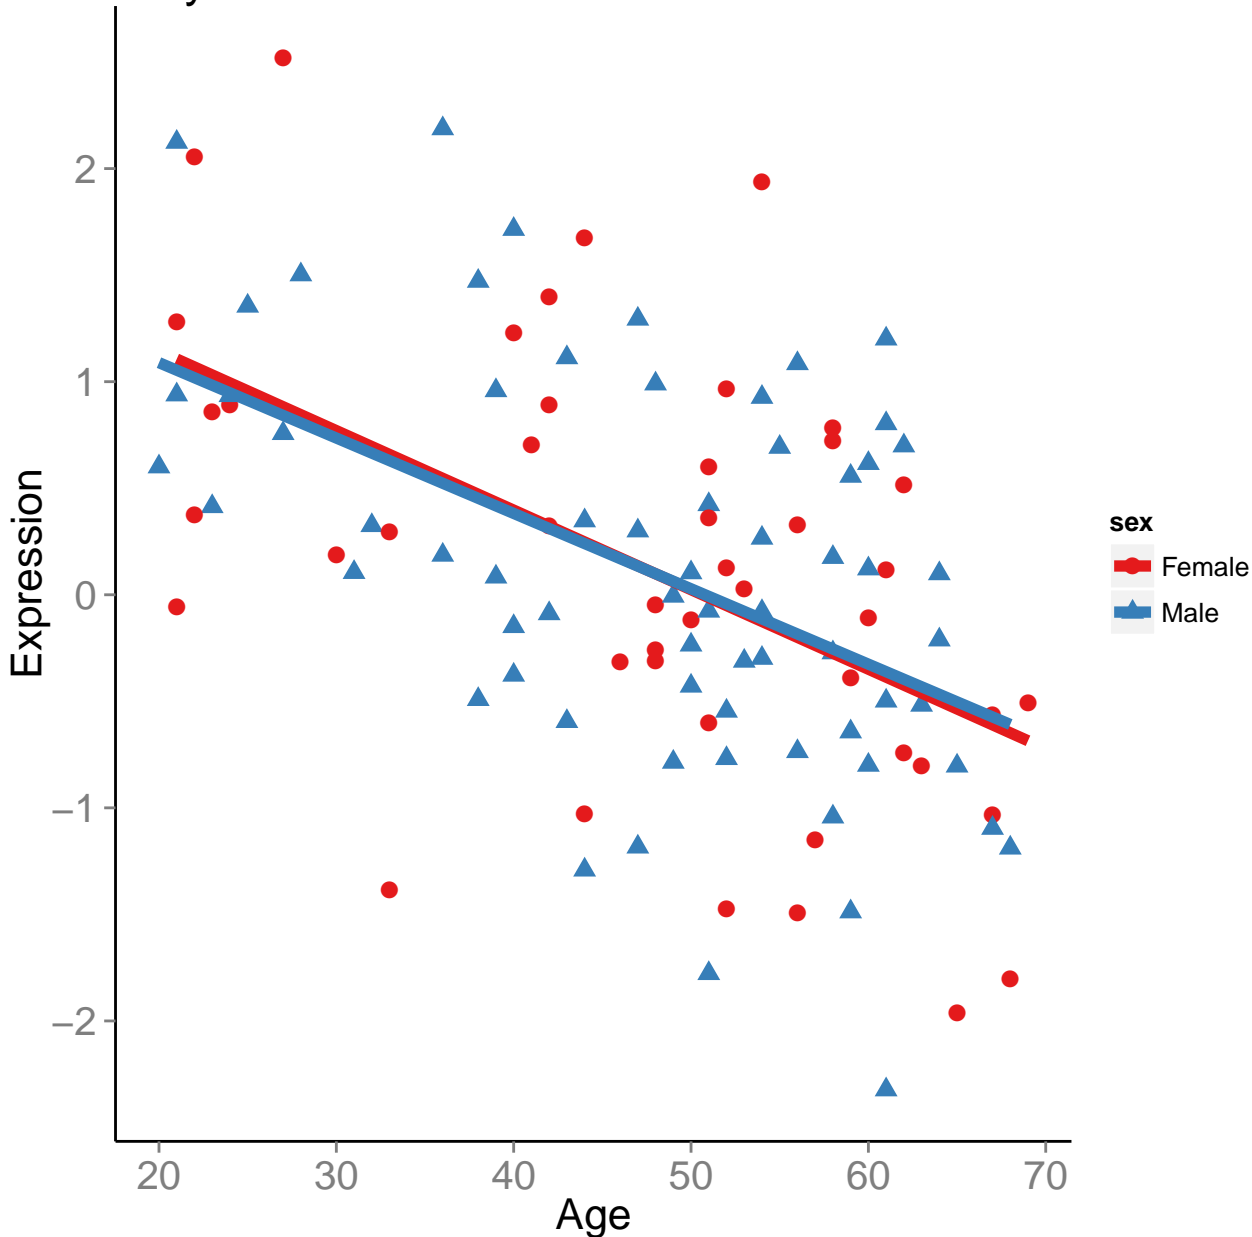

Artery: NDUFA4L2 Pearson-R=0.50 Pval=2.30E-08

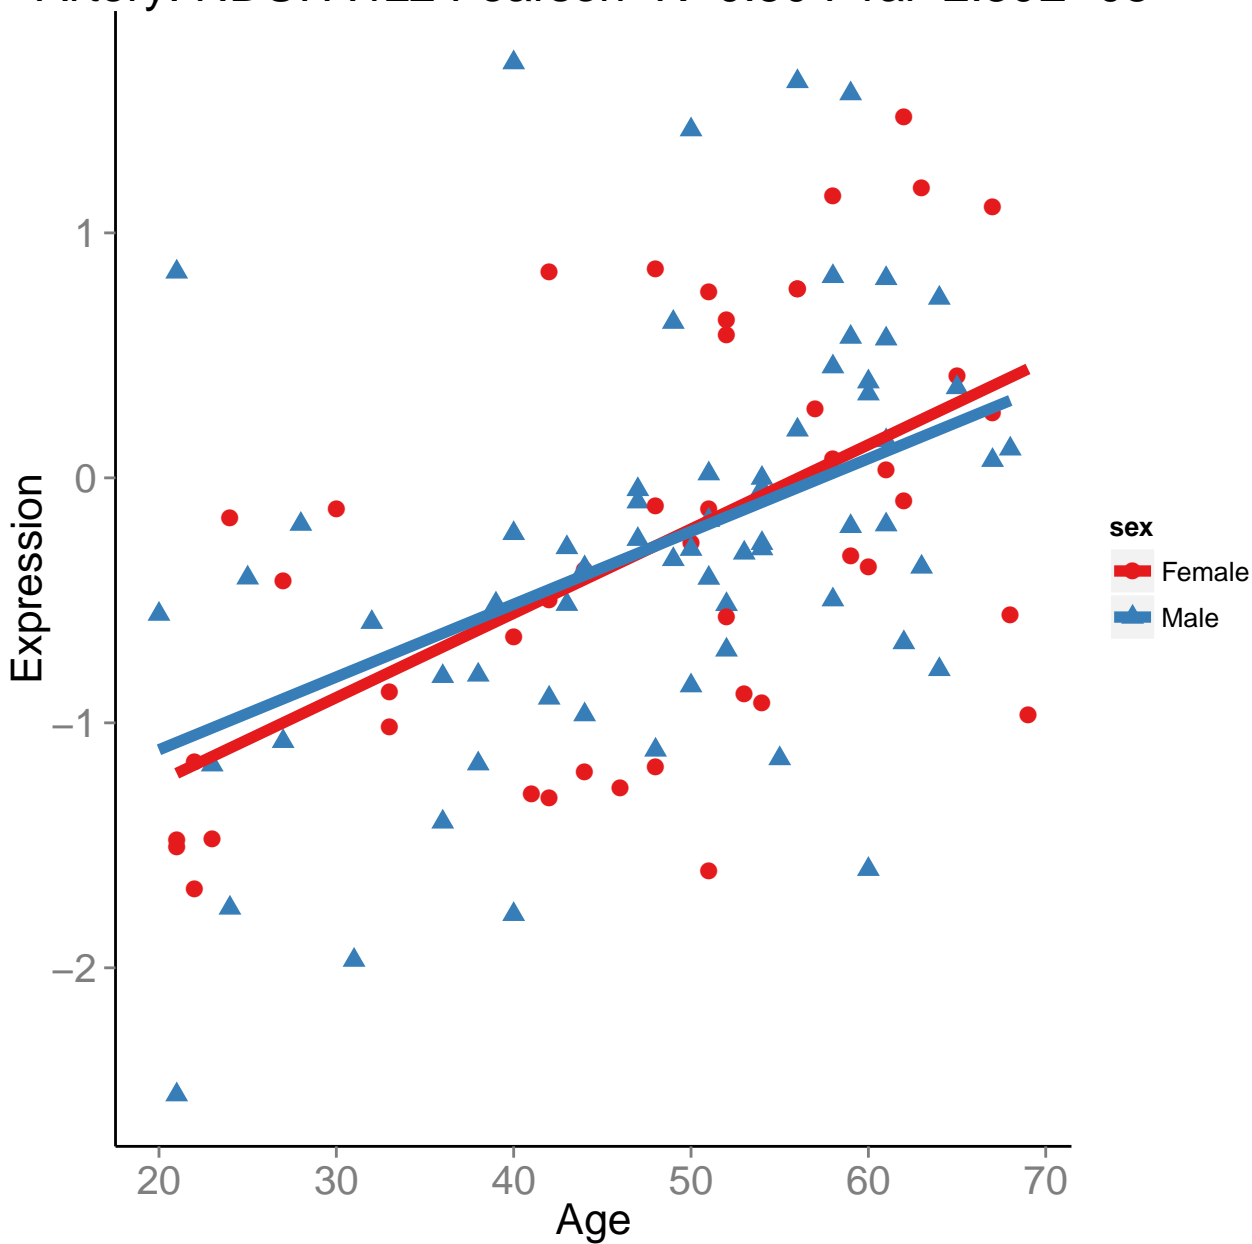



Artery: GUSBP11 Pearson-R=0.50 Pval=2.23E-08

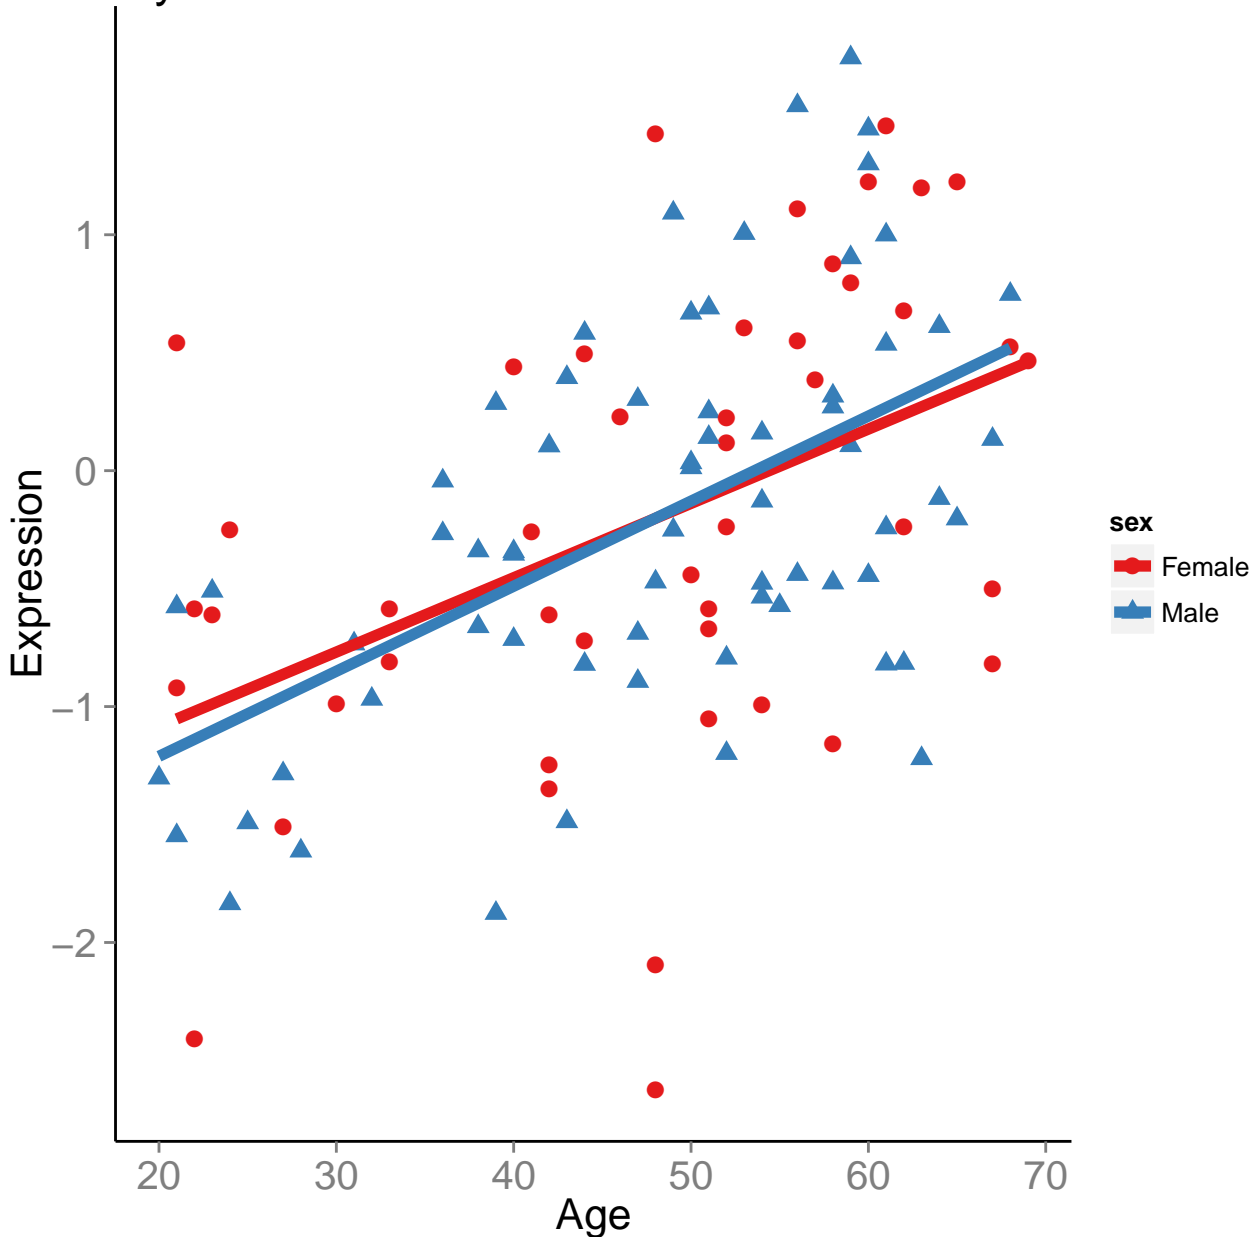

Artery: SAP25 Pearson-R=0.50 Pval=2.35E-08

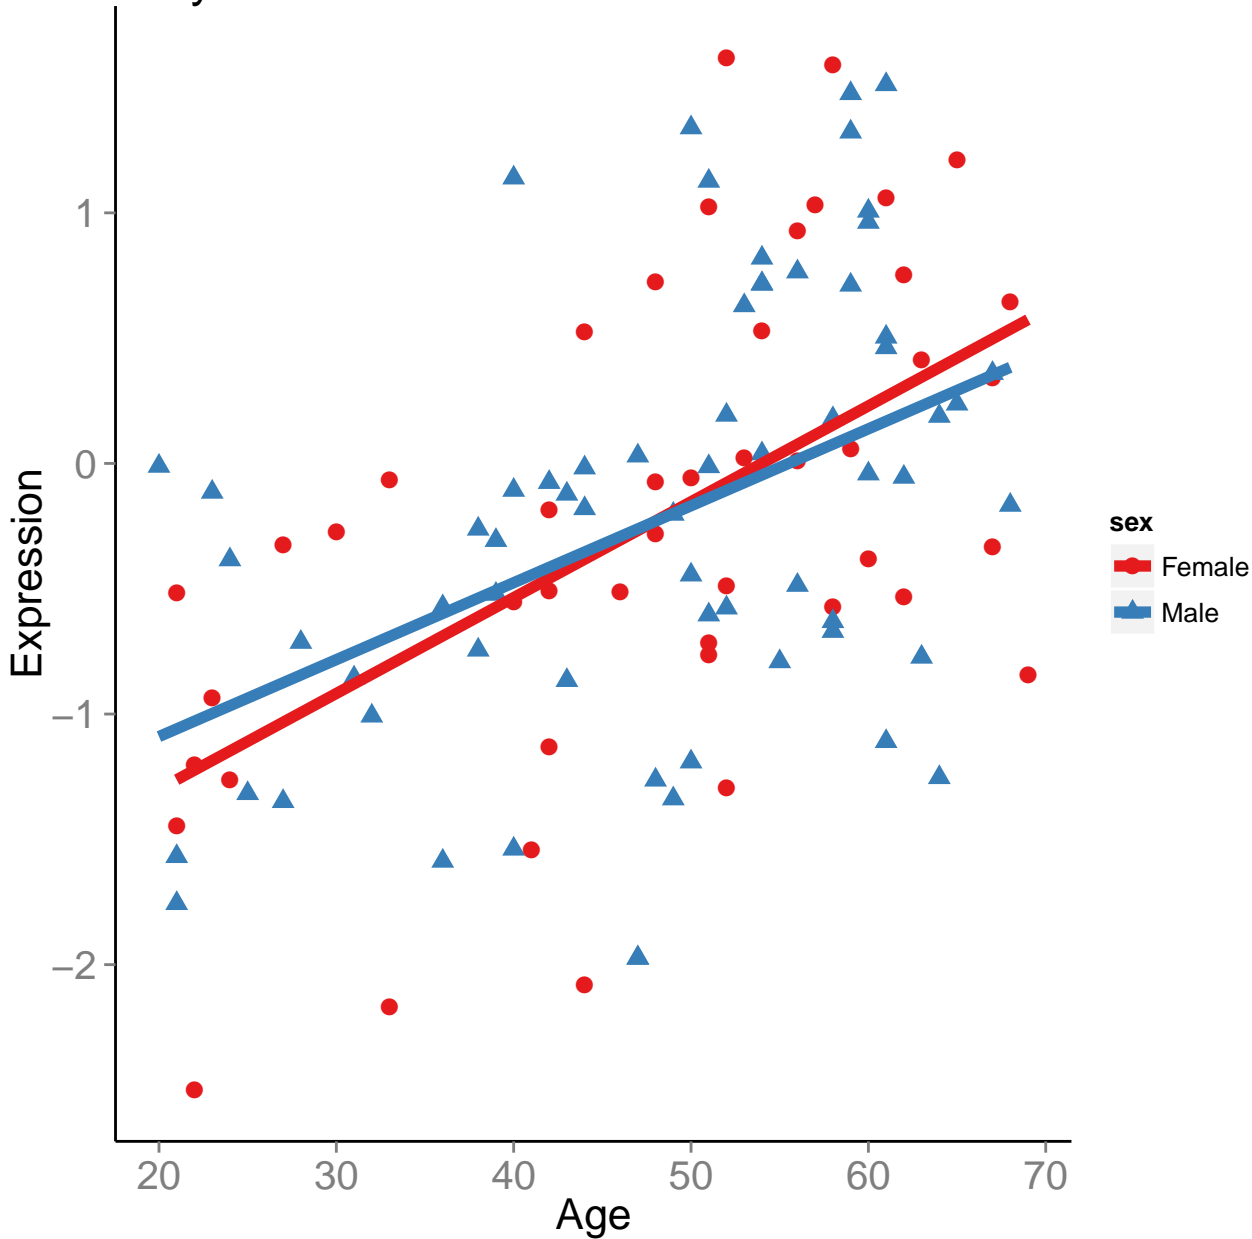

Artery: NRN1L Pearson-R=0.50 Pval=2.25E-08

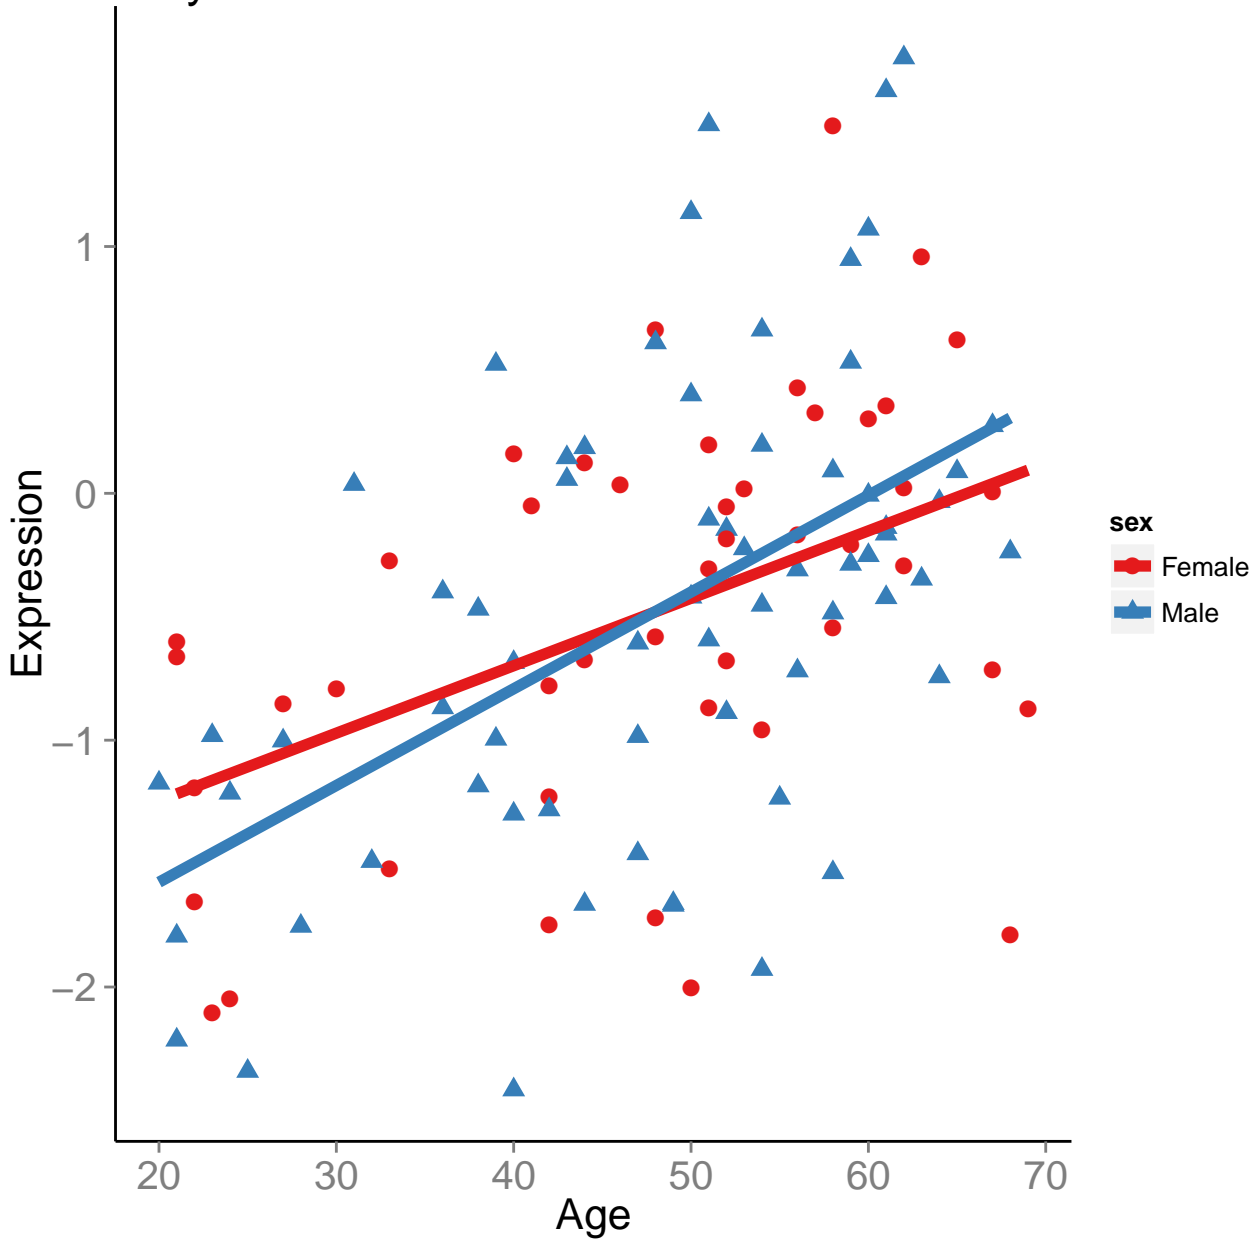

Artery: AC093838.4 Pearson-R=0.50 Pval=2.37E-08

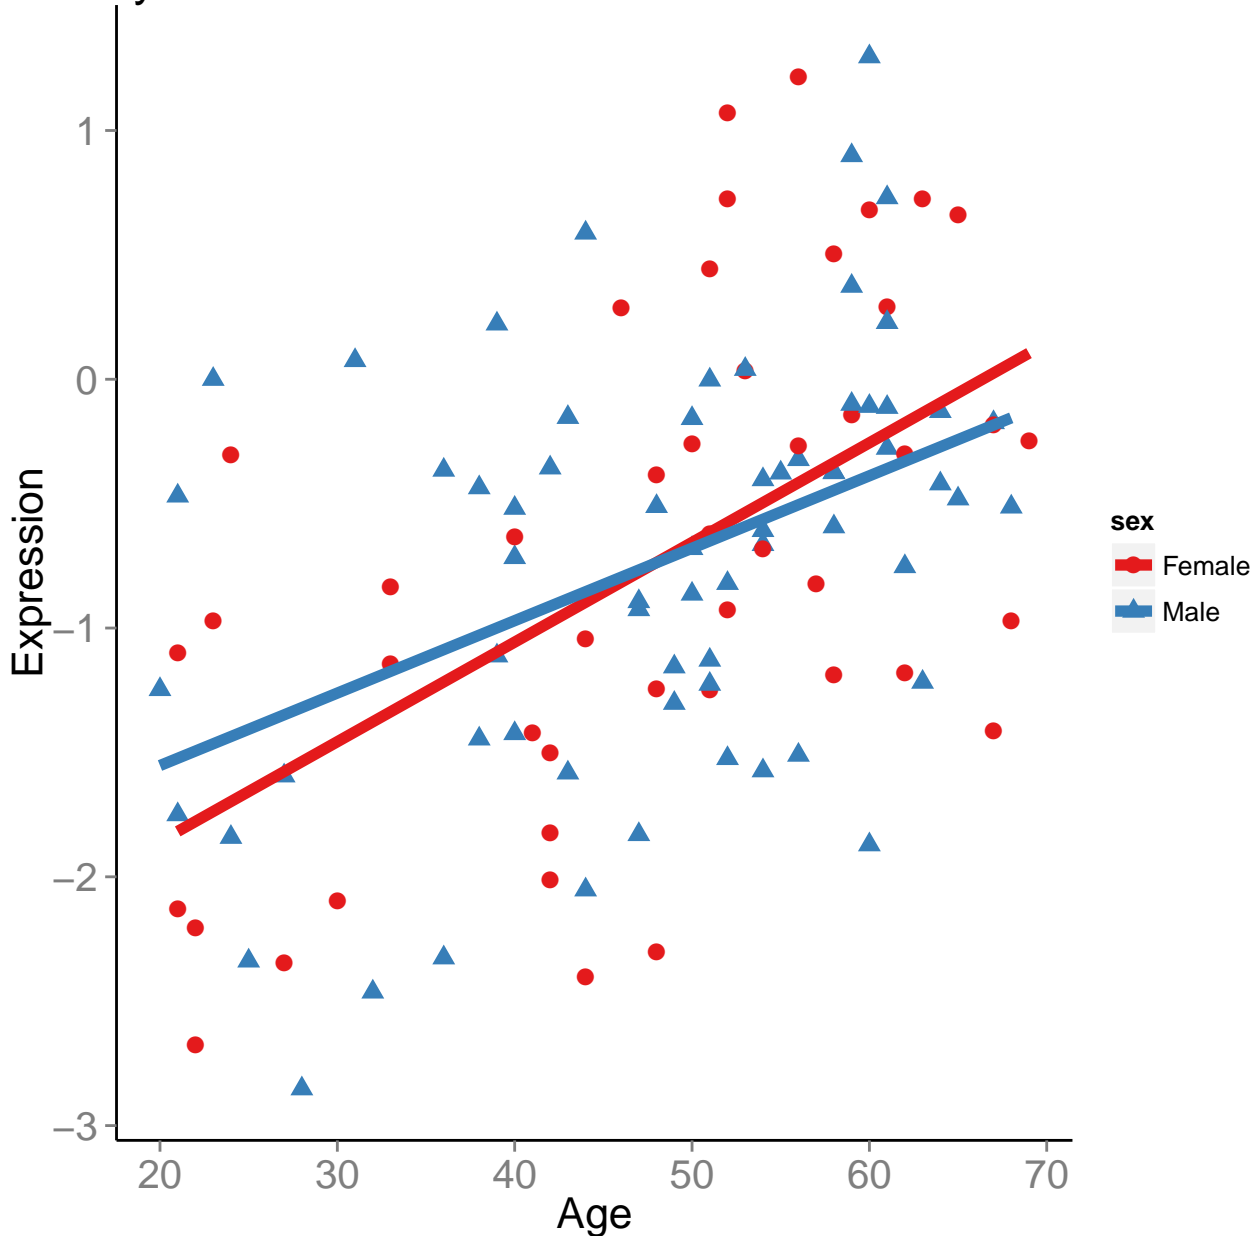

Artery: IL15 Pearson-R=0.50 Pval=2.55E-08

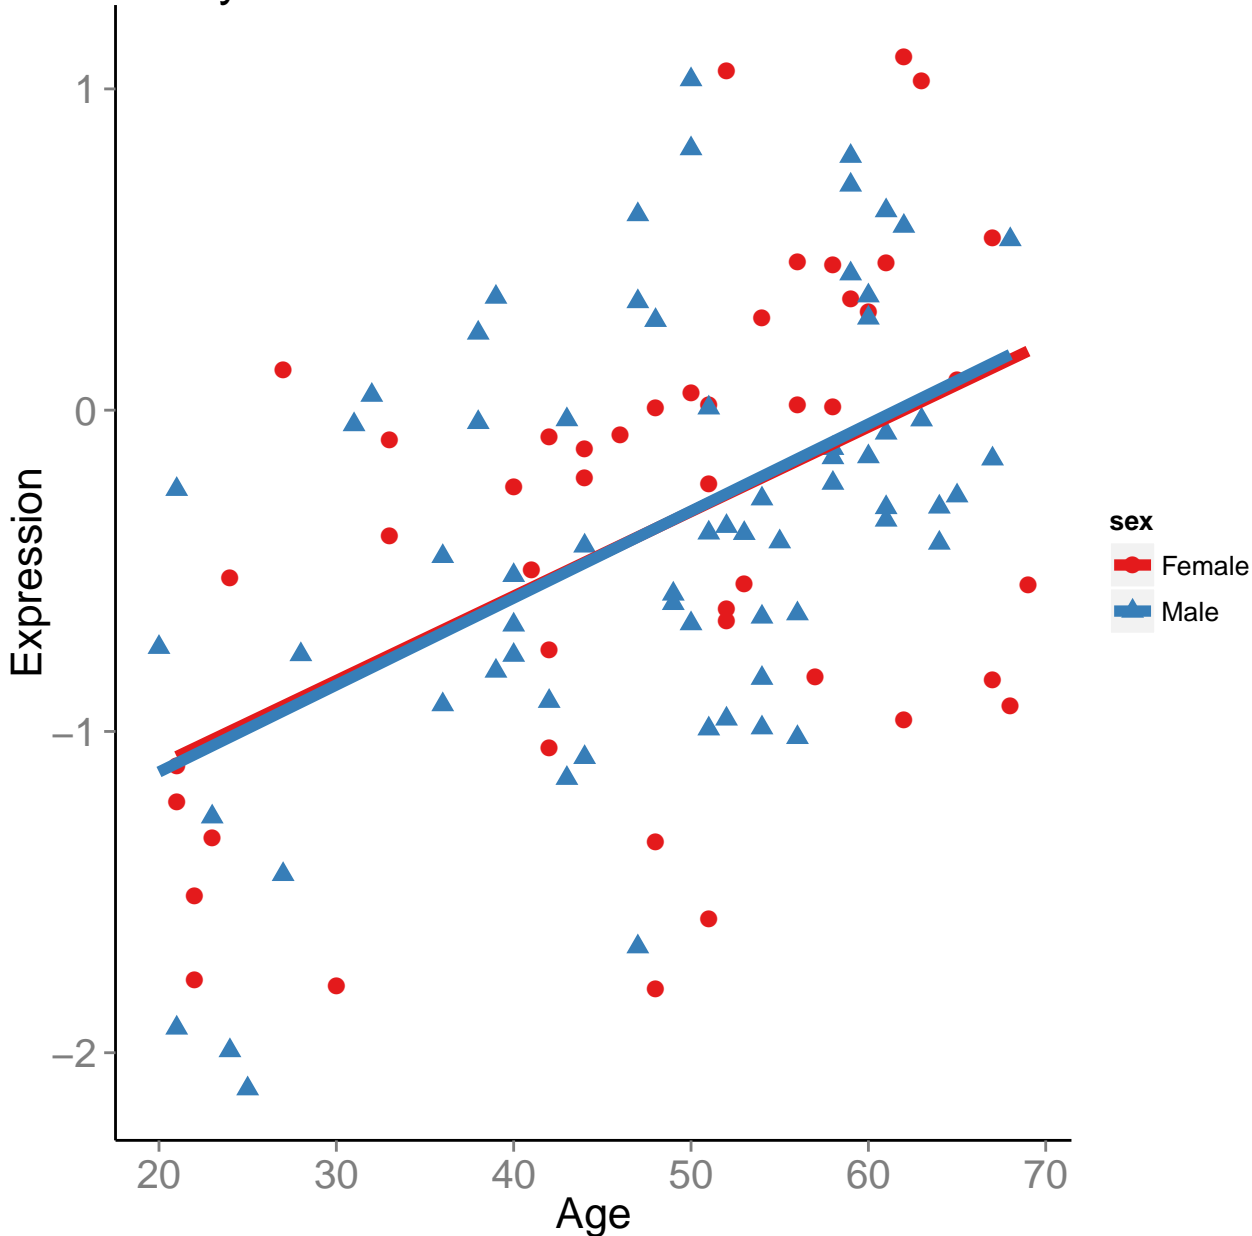

Artery: ASIC3 Pearson-R=0.50 Pval=2.62E-08

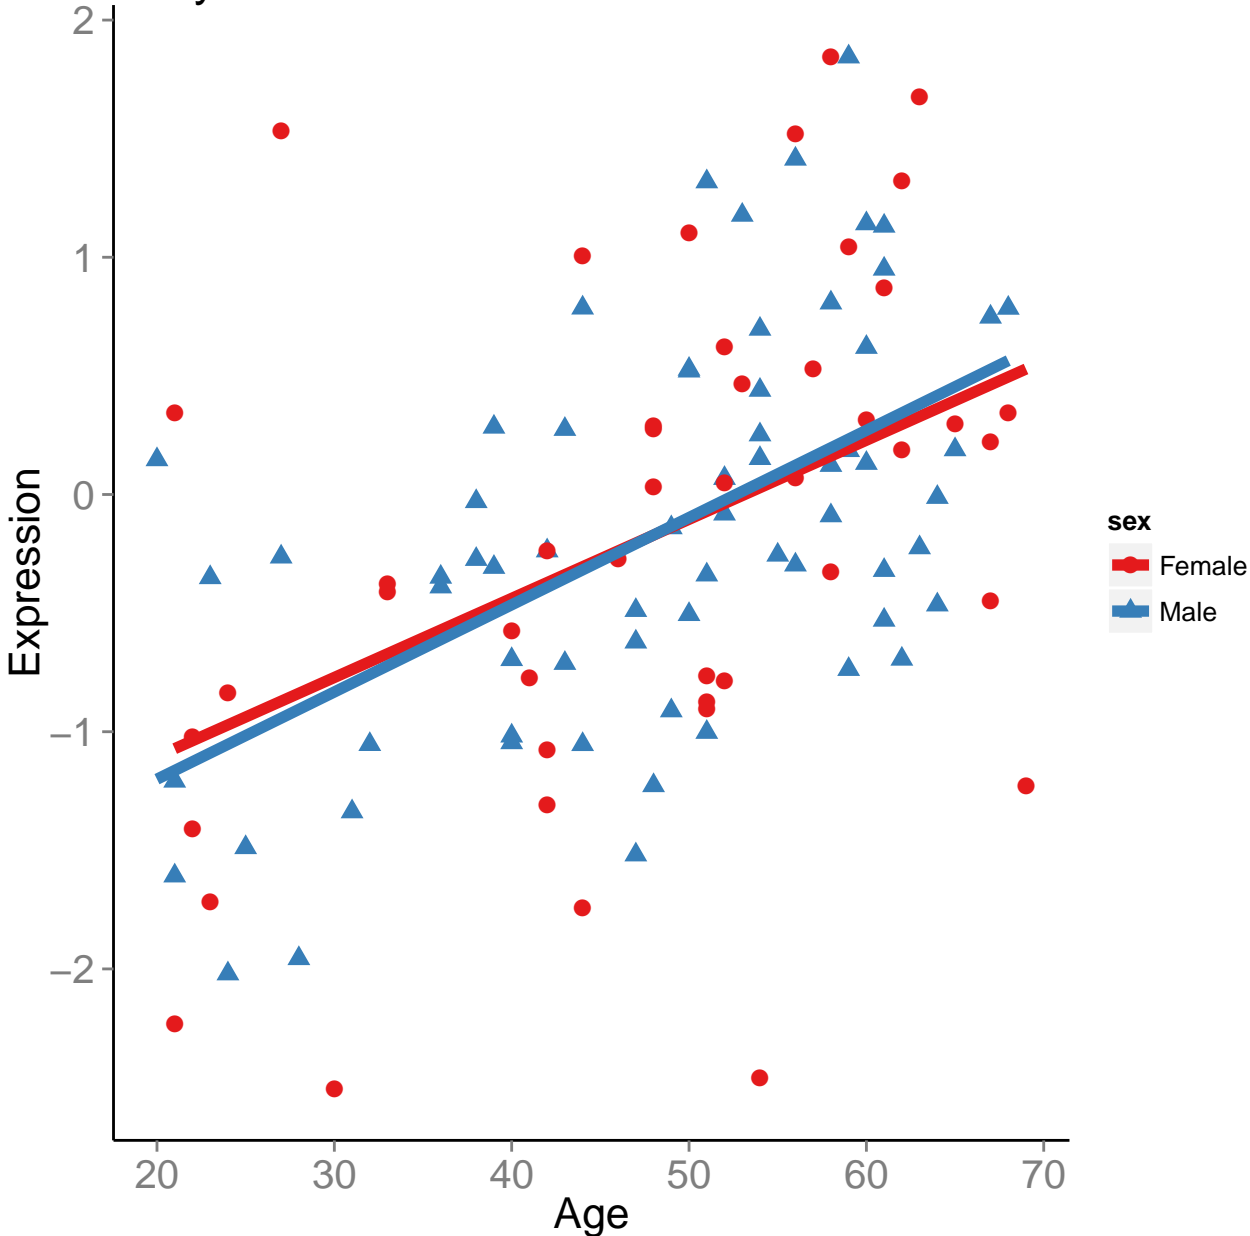

Artery: WDR91 Pearson-R=0.50 Pval=2.64E-08

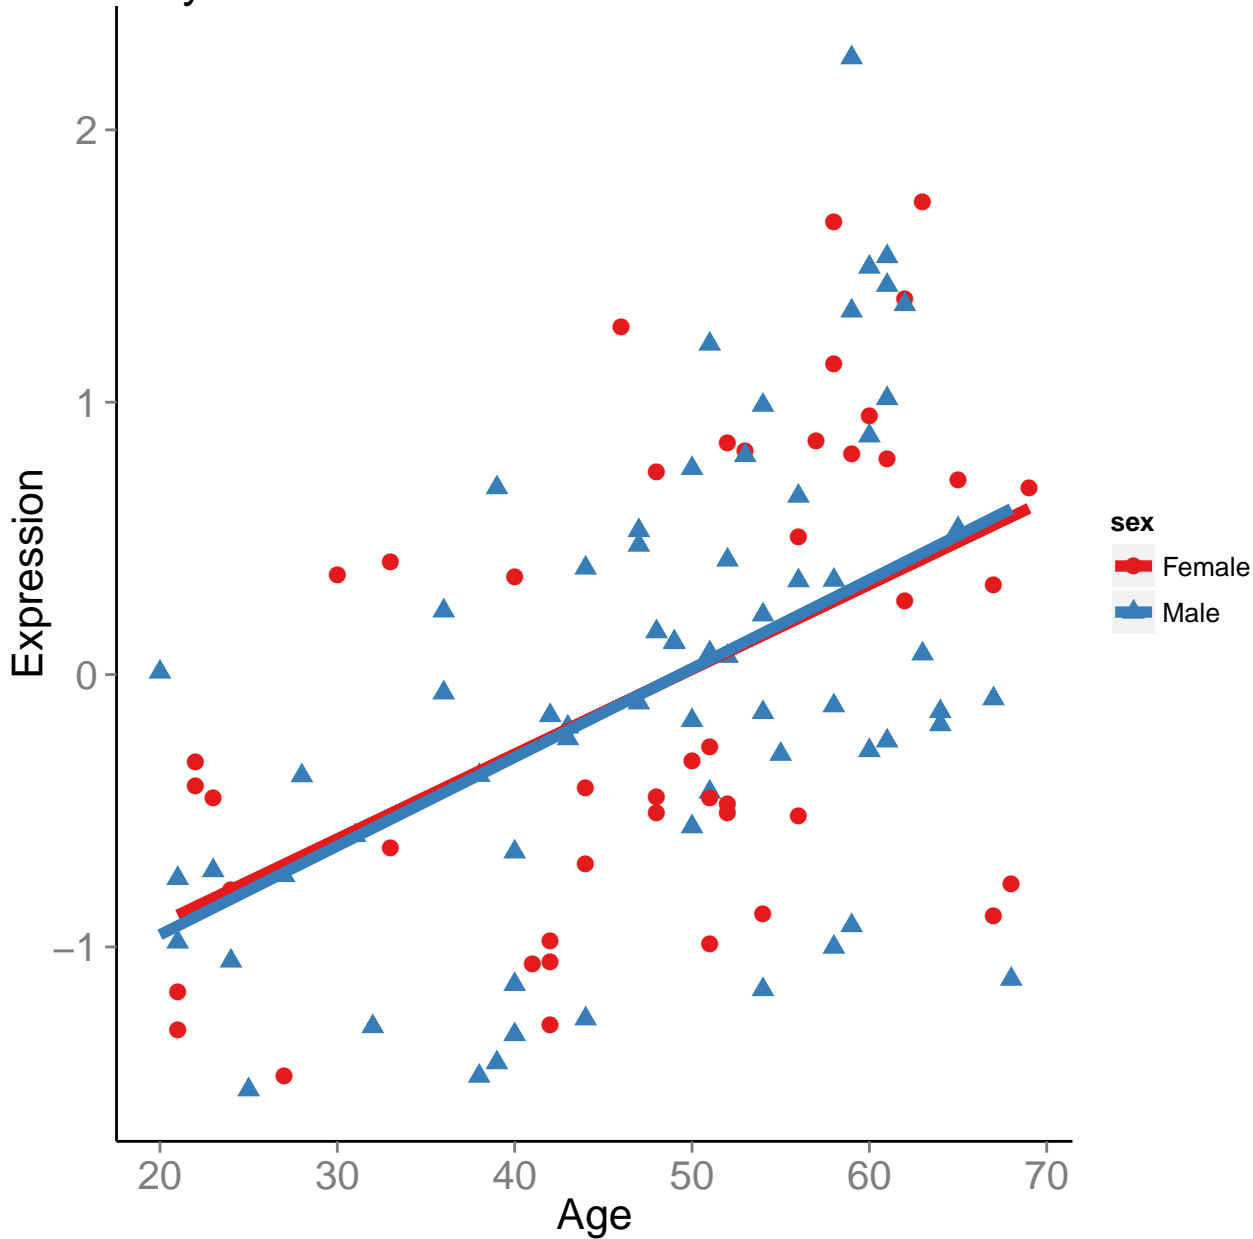

Artery: PREX2 Pearson-R=0.50 Pval=2.87E-08

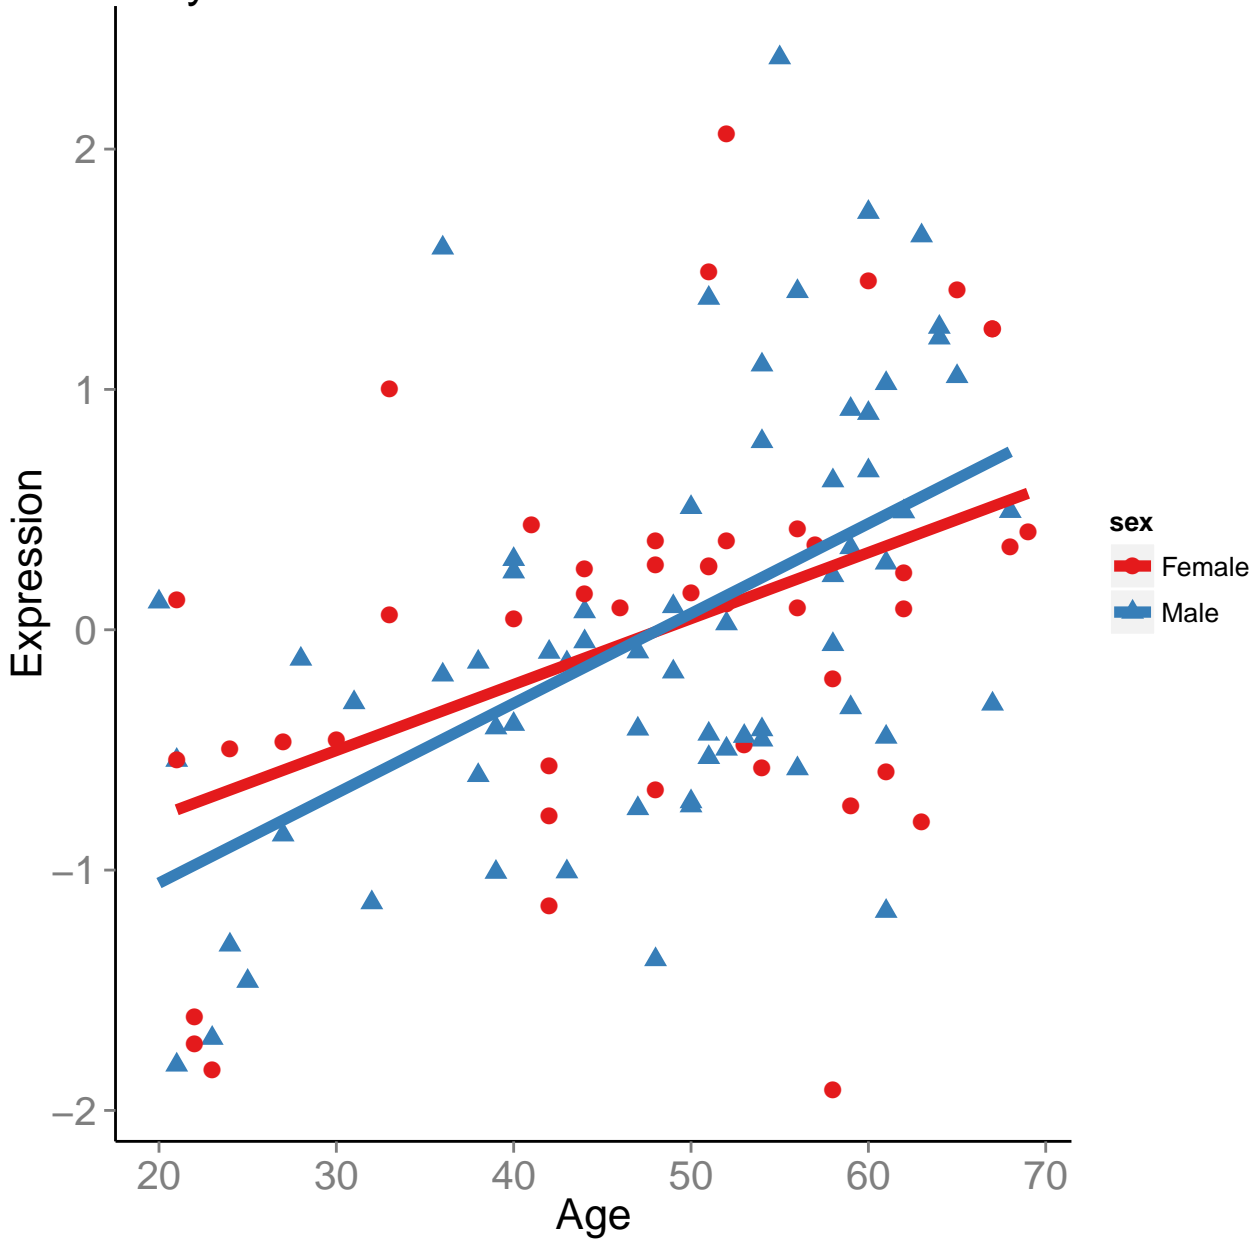



Artery: E2F6 Pearson-R=-0.50 Pval=2.86E-08

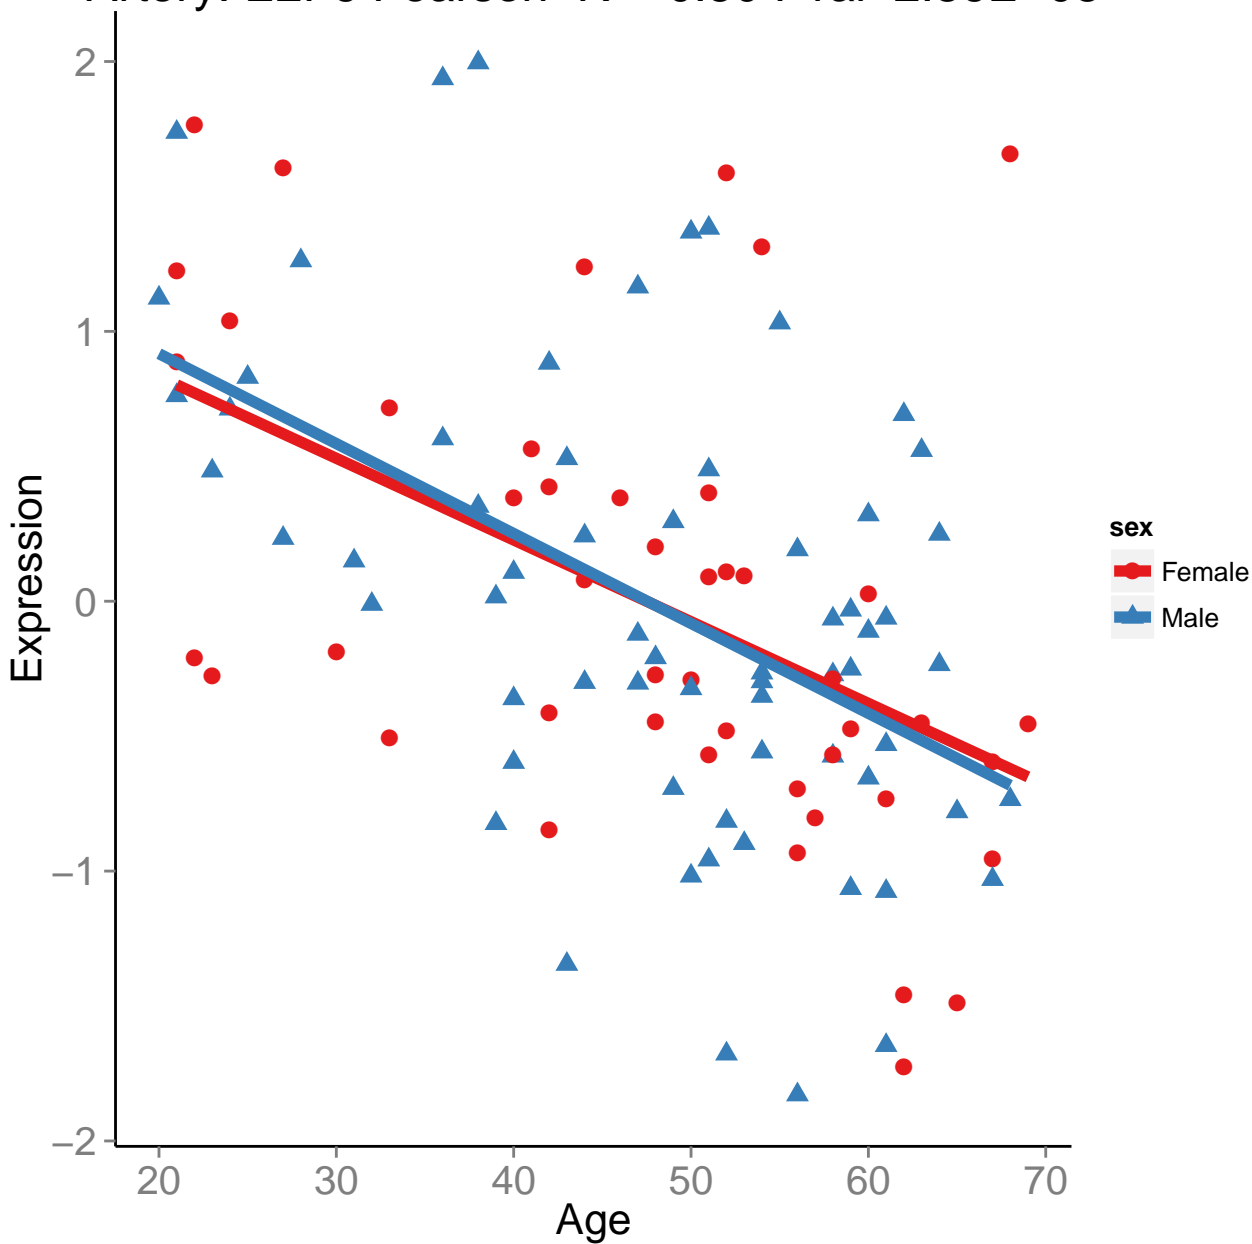

Artery: RBM18 Pearson-R=-0.49 Pval=2.95E-08

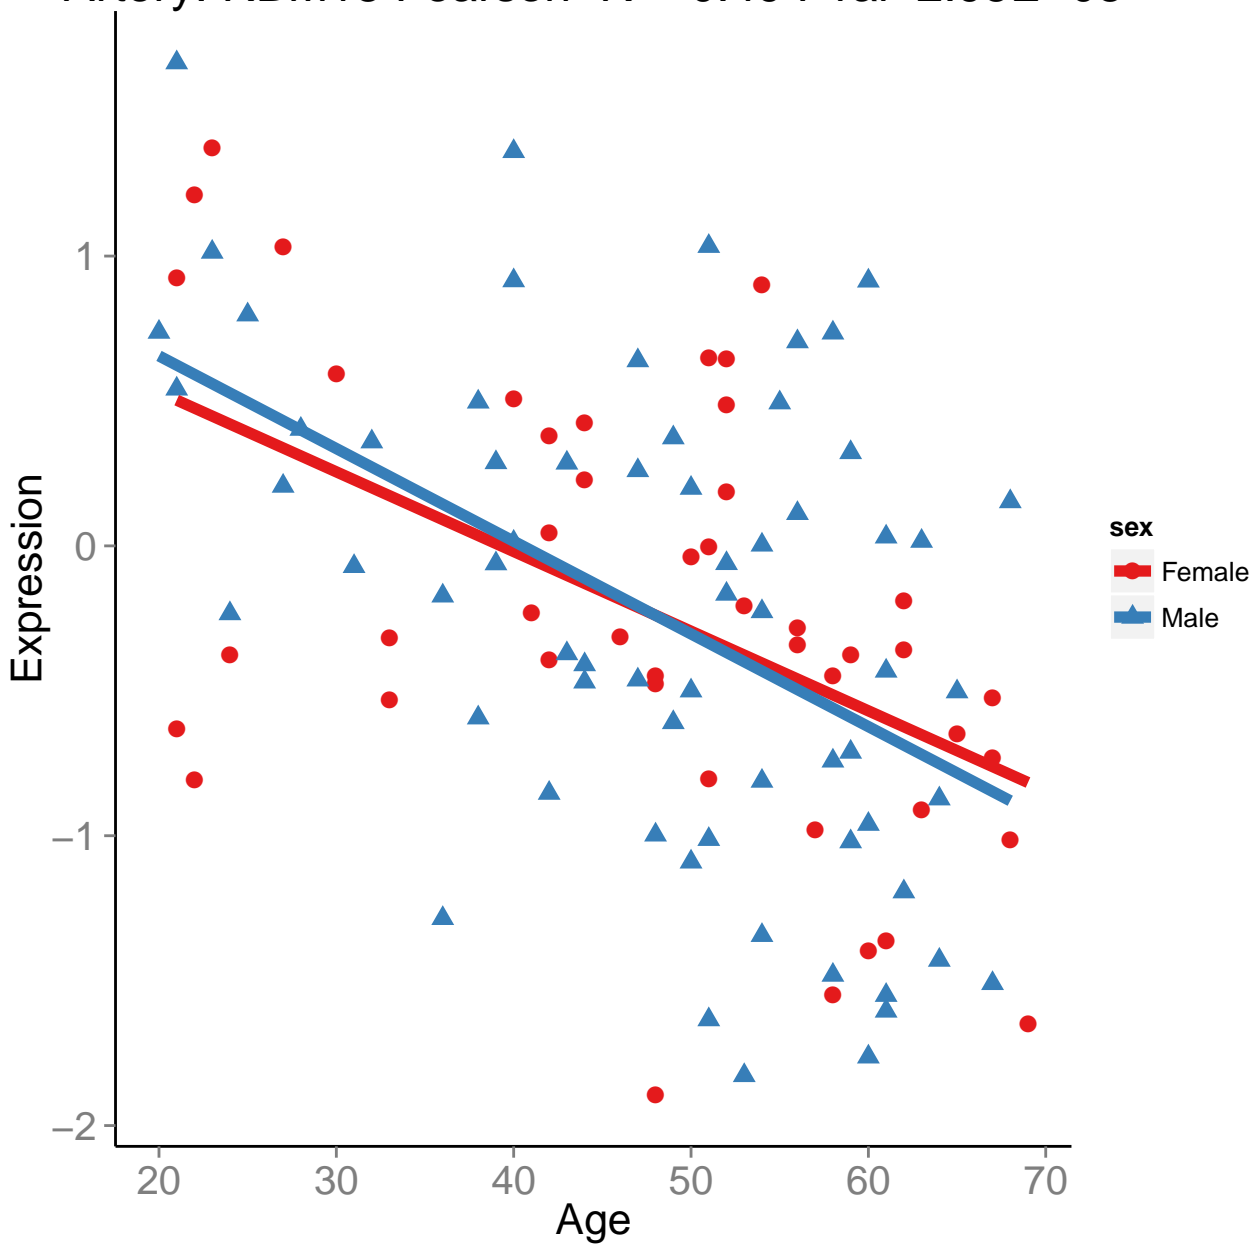

Artery: DMKN Pearson-R=0.49 Pval=3.00E-08

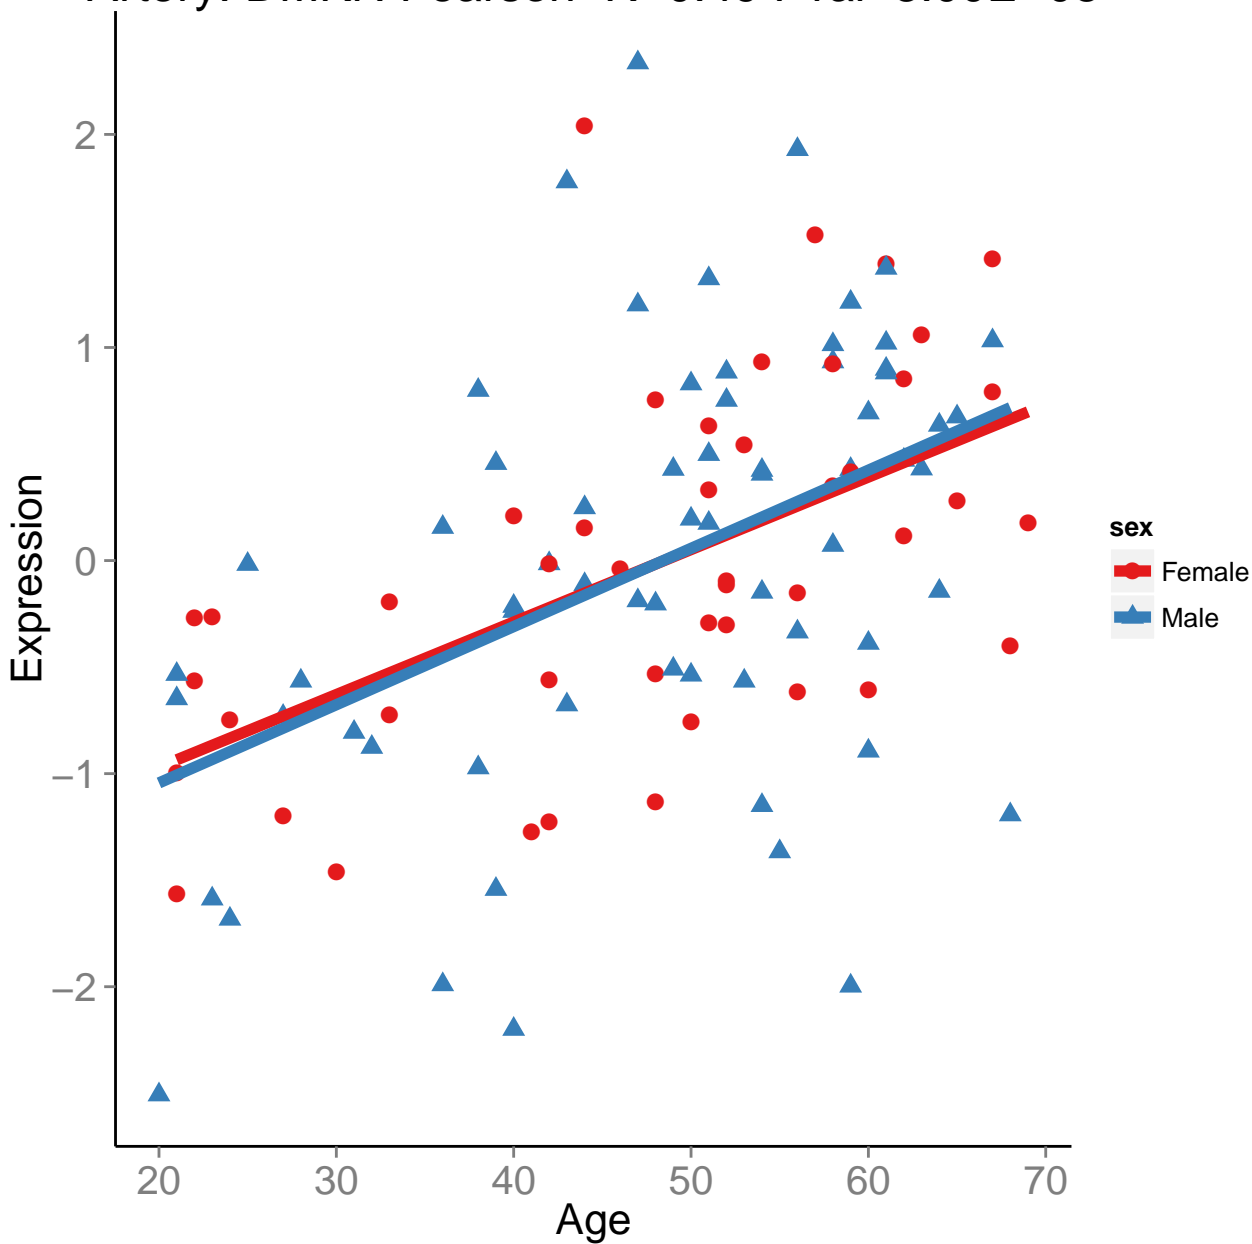

Artery: SDR39U1 Pearson-R=0.49 Pval=3.01E-08

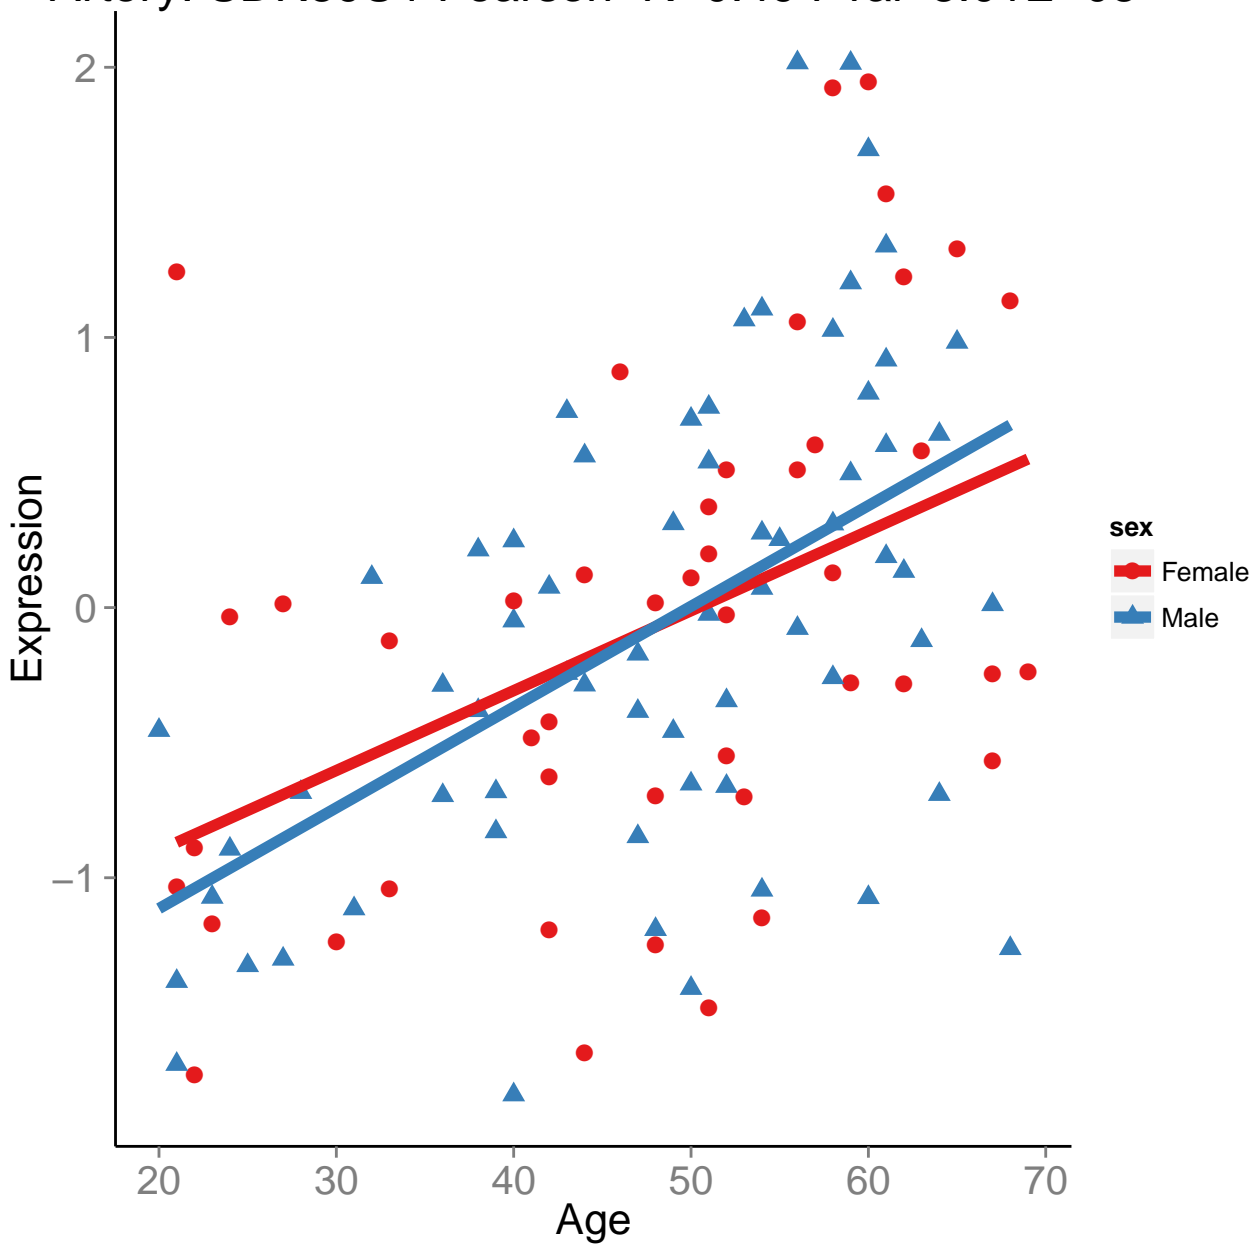

Artery: FAM115A Pearson-R=-0.49 Pval=3.16E-08

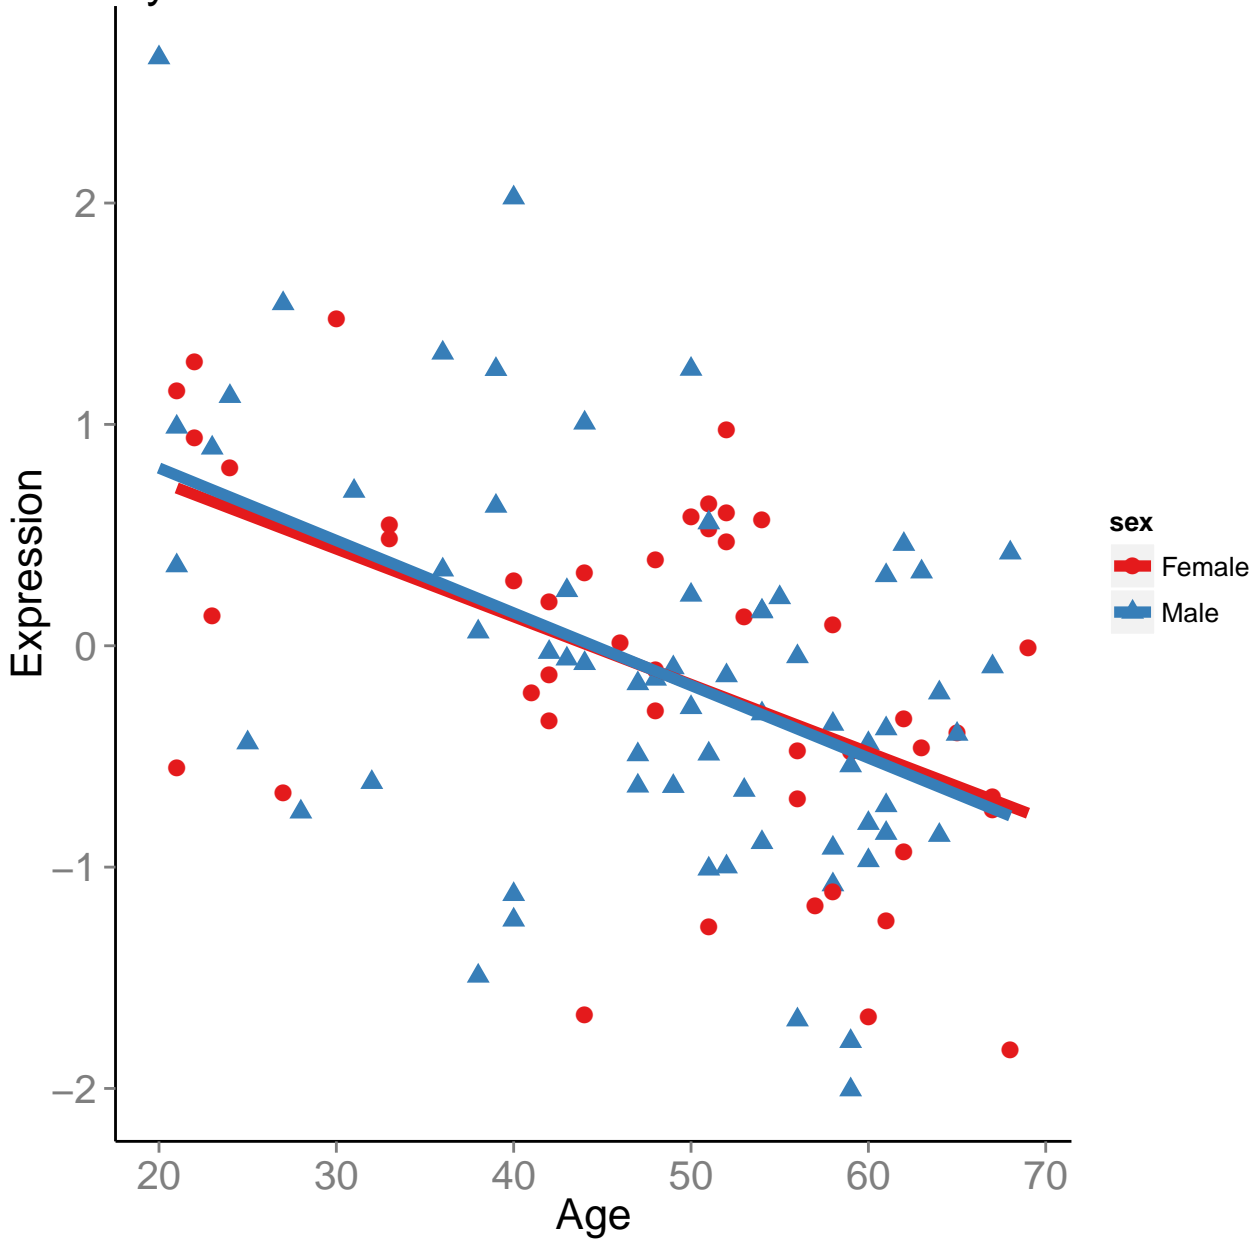

Artery: TGFB1 Pearson-R=0.49 Pval=3.13E-08

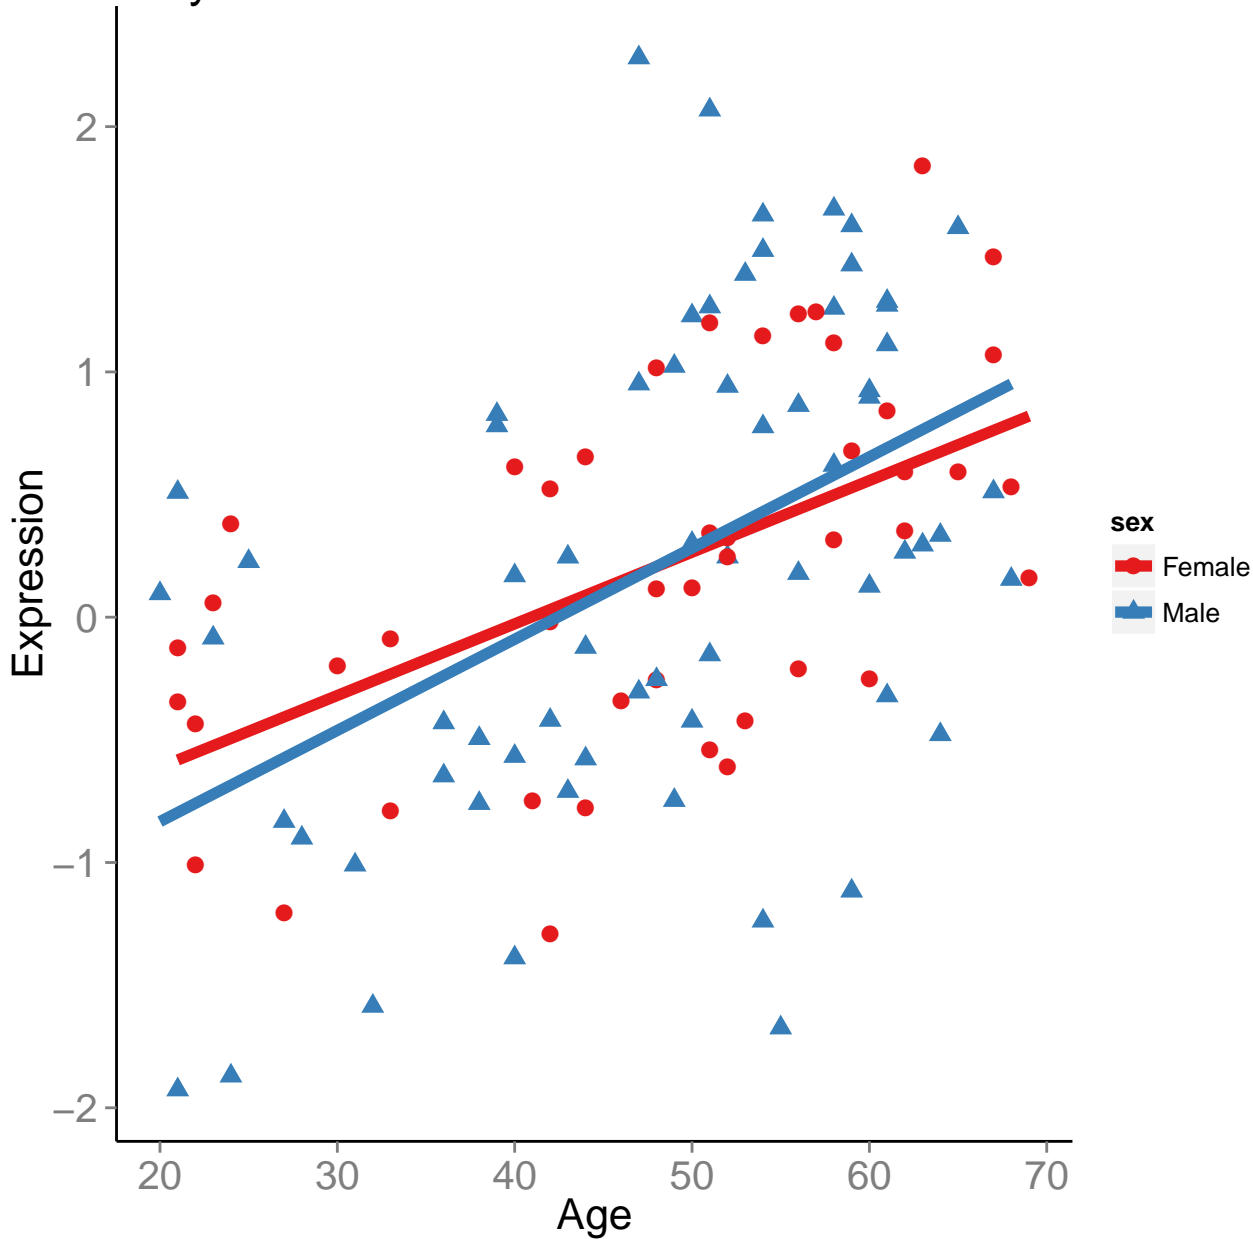

Artery: ADAM8 Pearson-R=0.49 Pval=3.47E-08

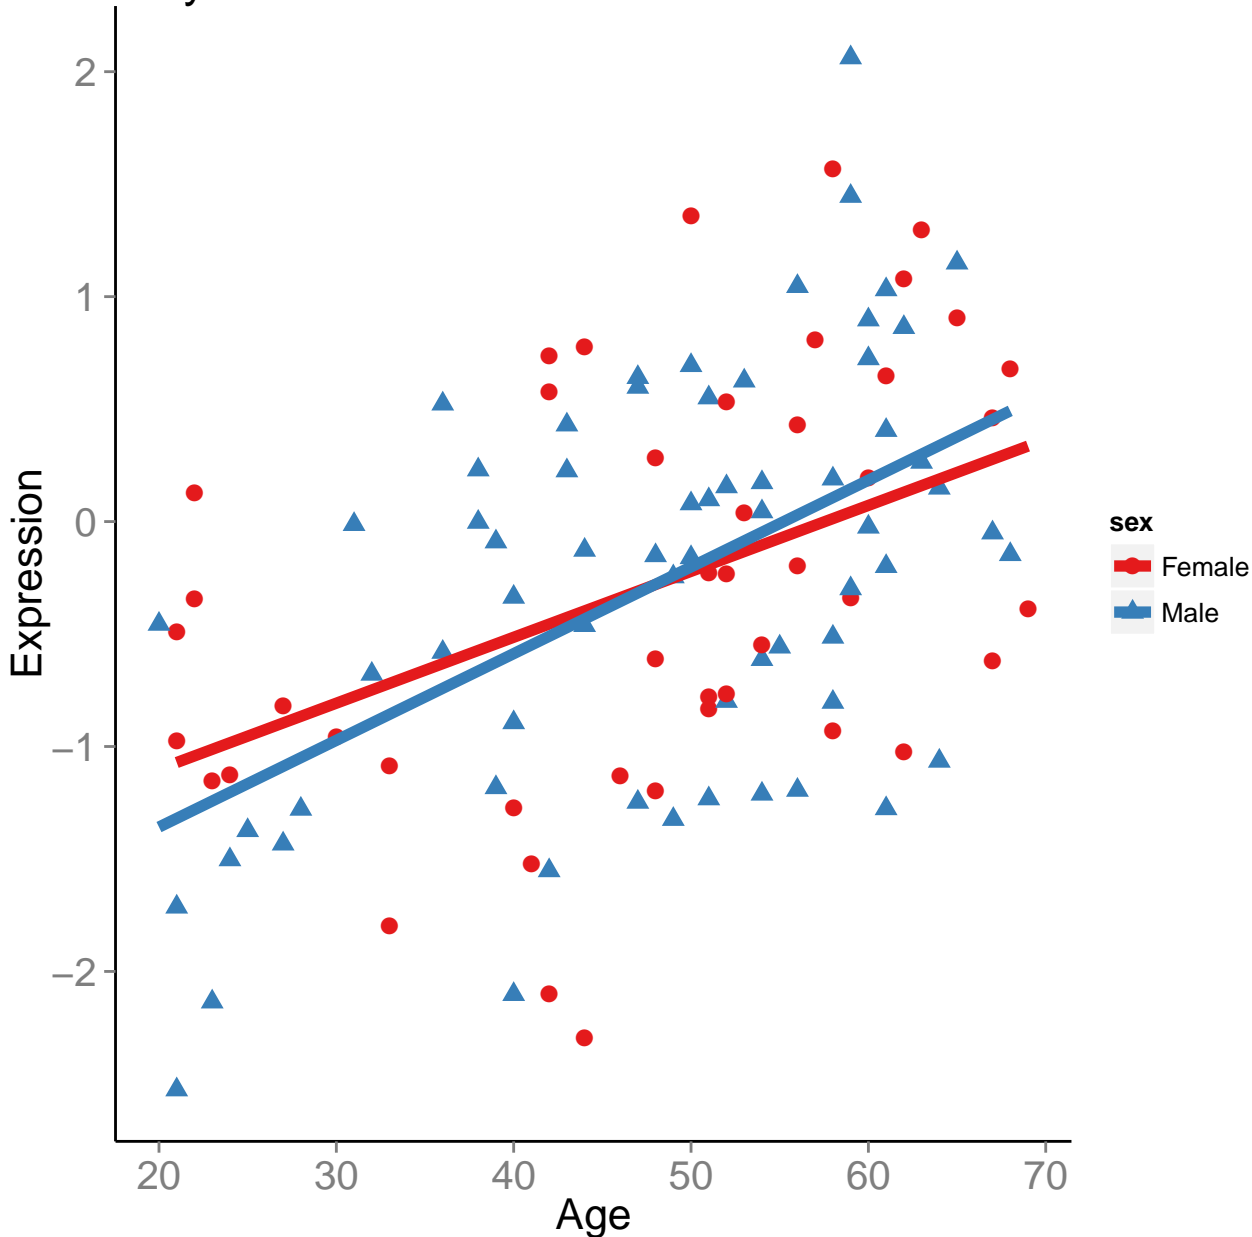

Artery: NCKIPSD Pearson-R=0.49 Pval=3.44E-08

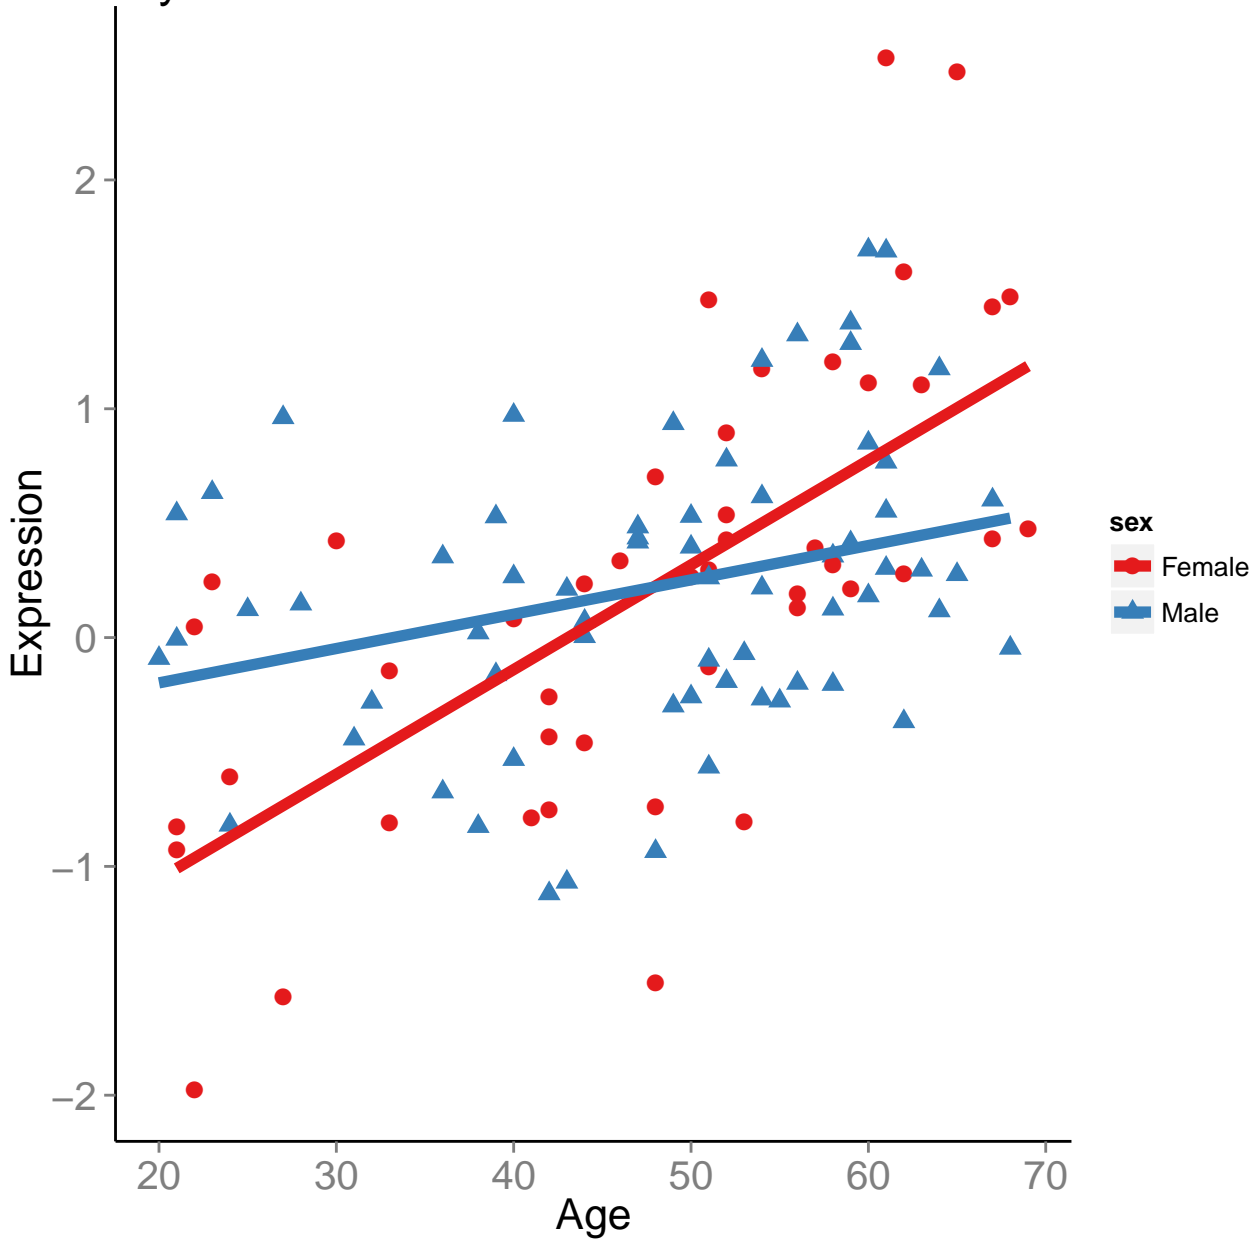



Artery: PARVG Pearson-R=0.49 Pval=3.57E-08

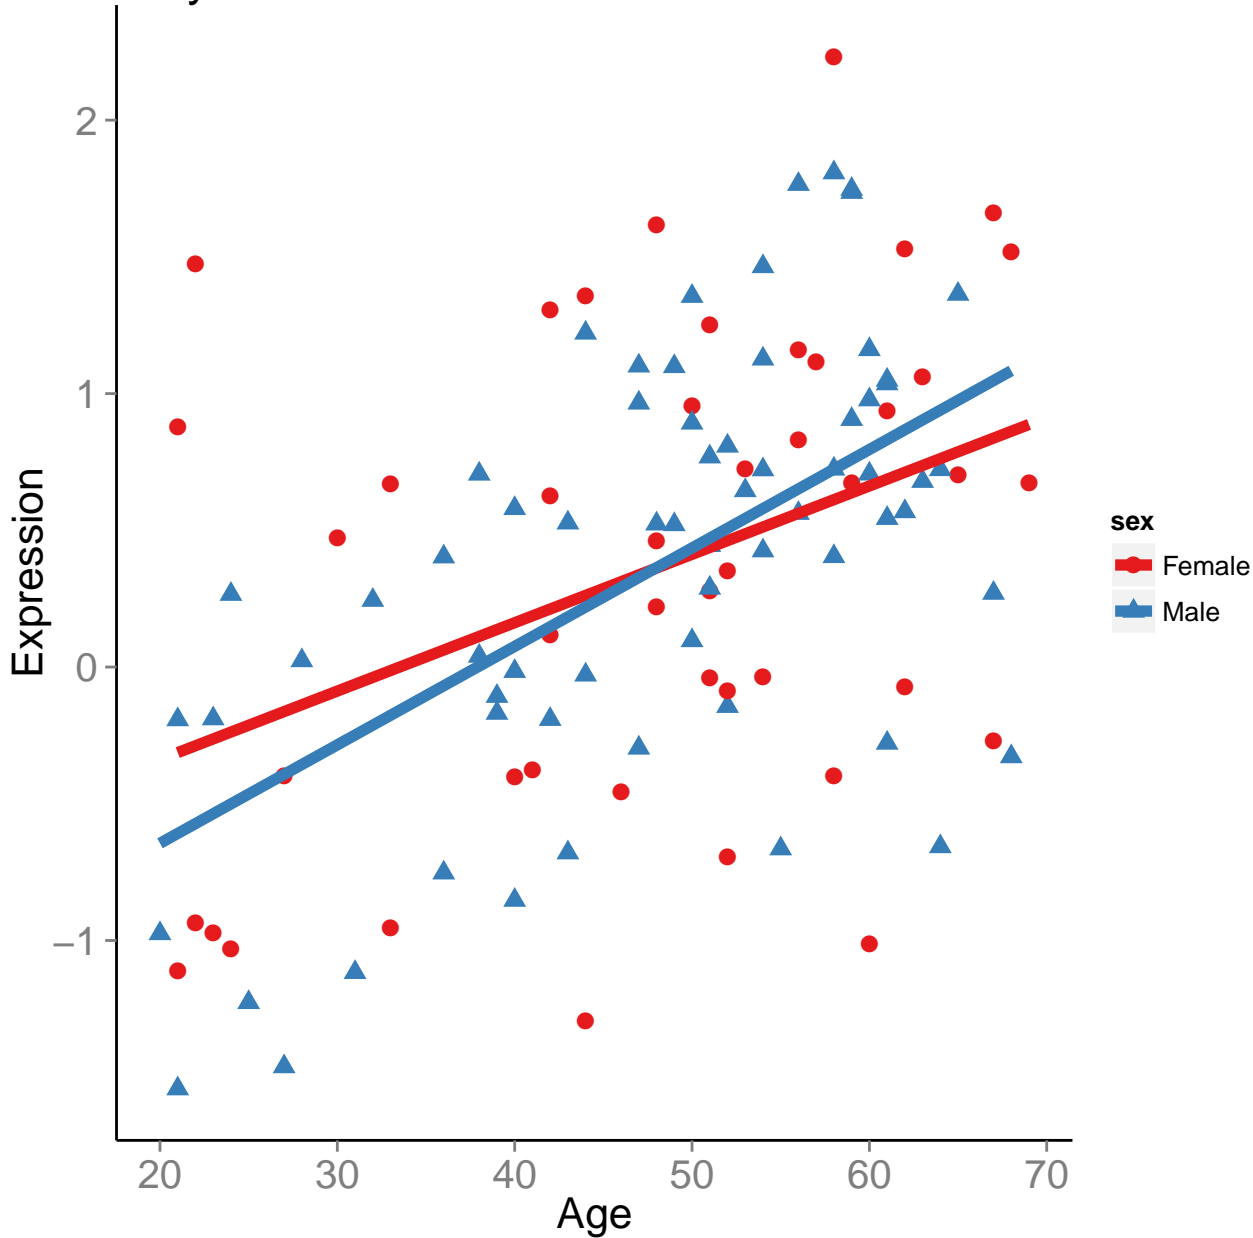

Heart: FGR Pearson-R=0.55 Pval=6.83E-08

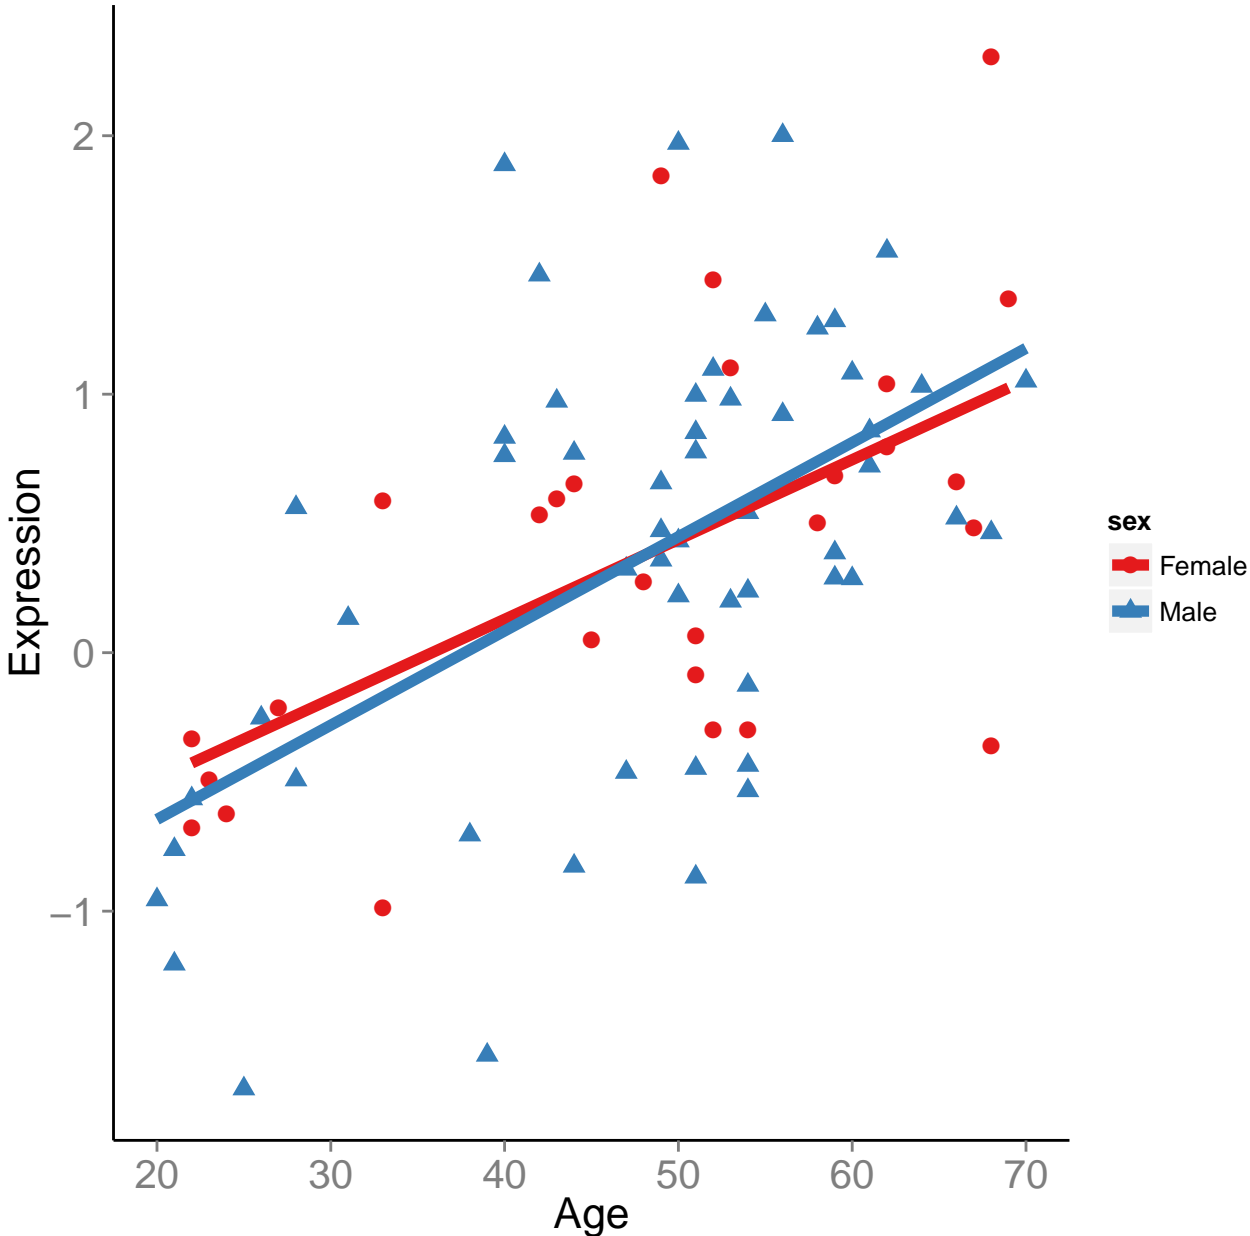

Heart: MT1X Pearson-R=0.57 Pval=2.07E-08

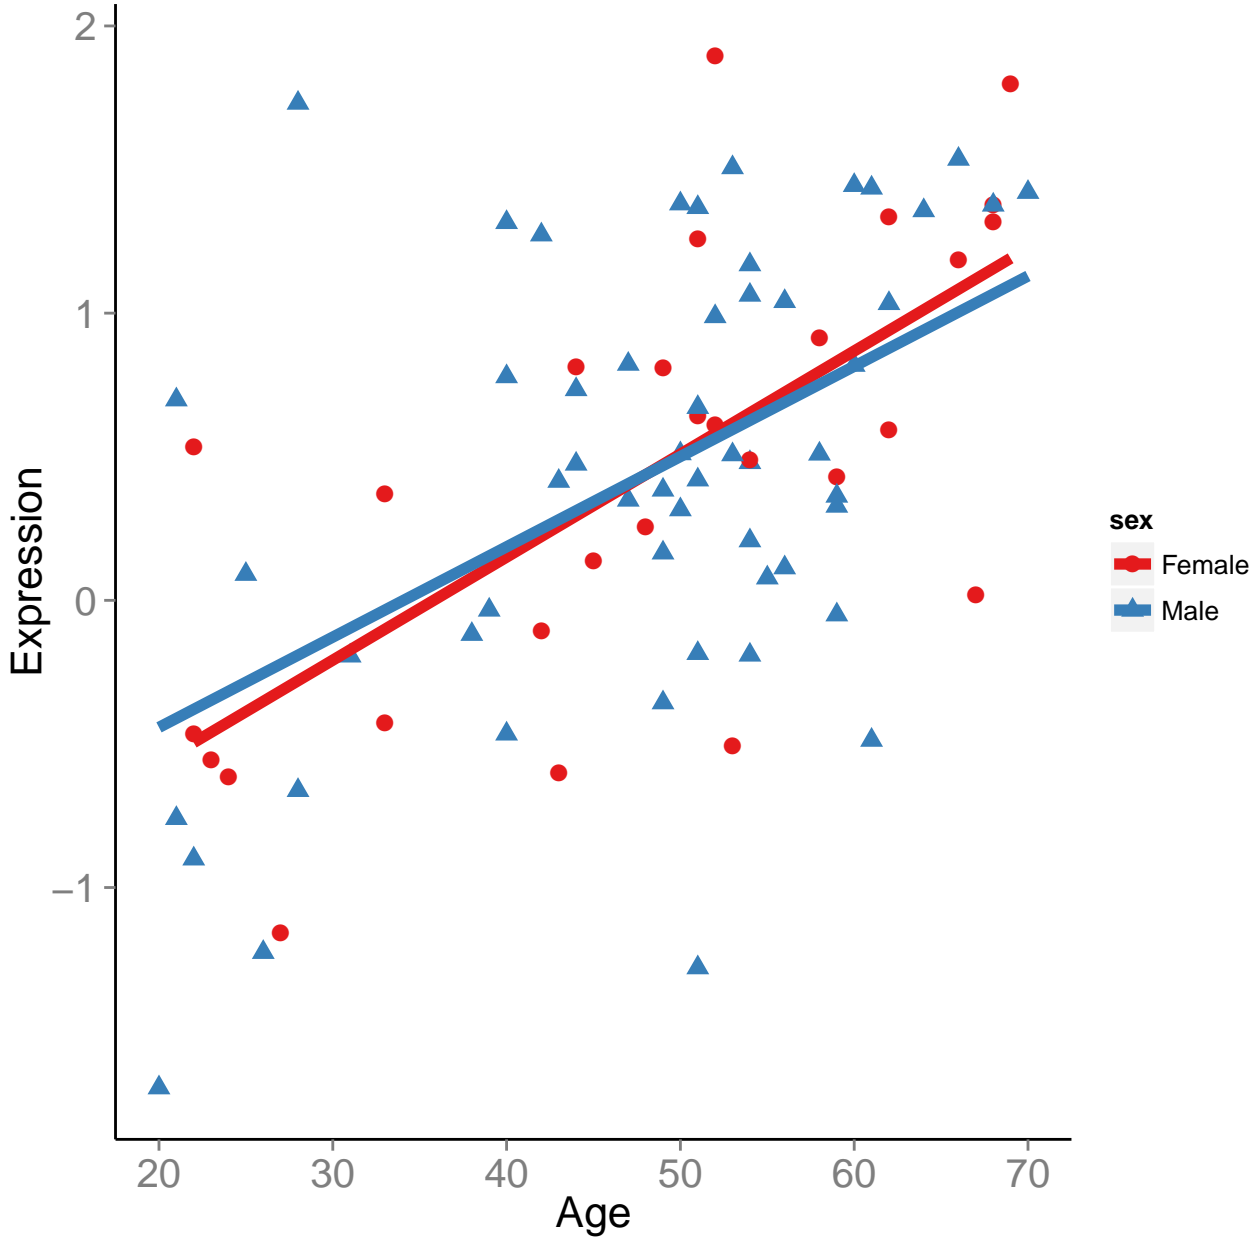

Heart: RP11-343H19.2 Pearson-R=0.56 Pval=4.90E-08

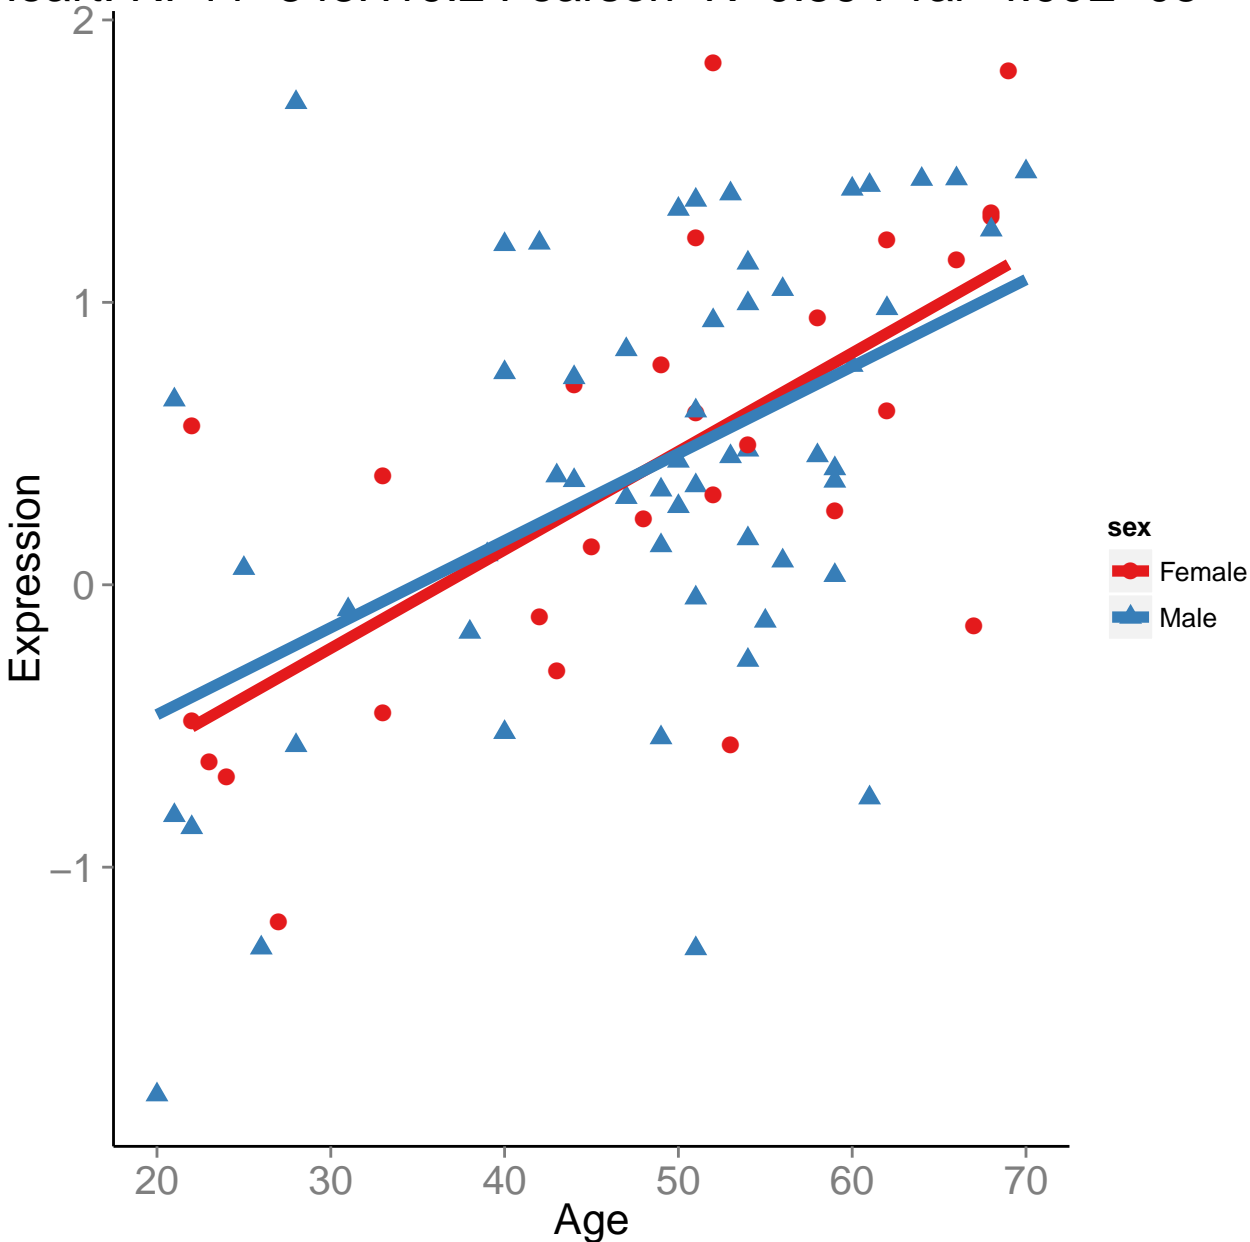

Heart: ING5 Pearson-R=0.58 Pval=1.05E-08

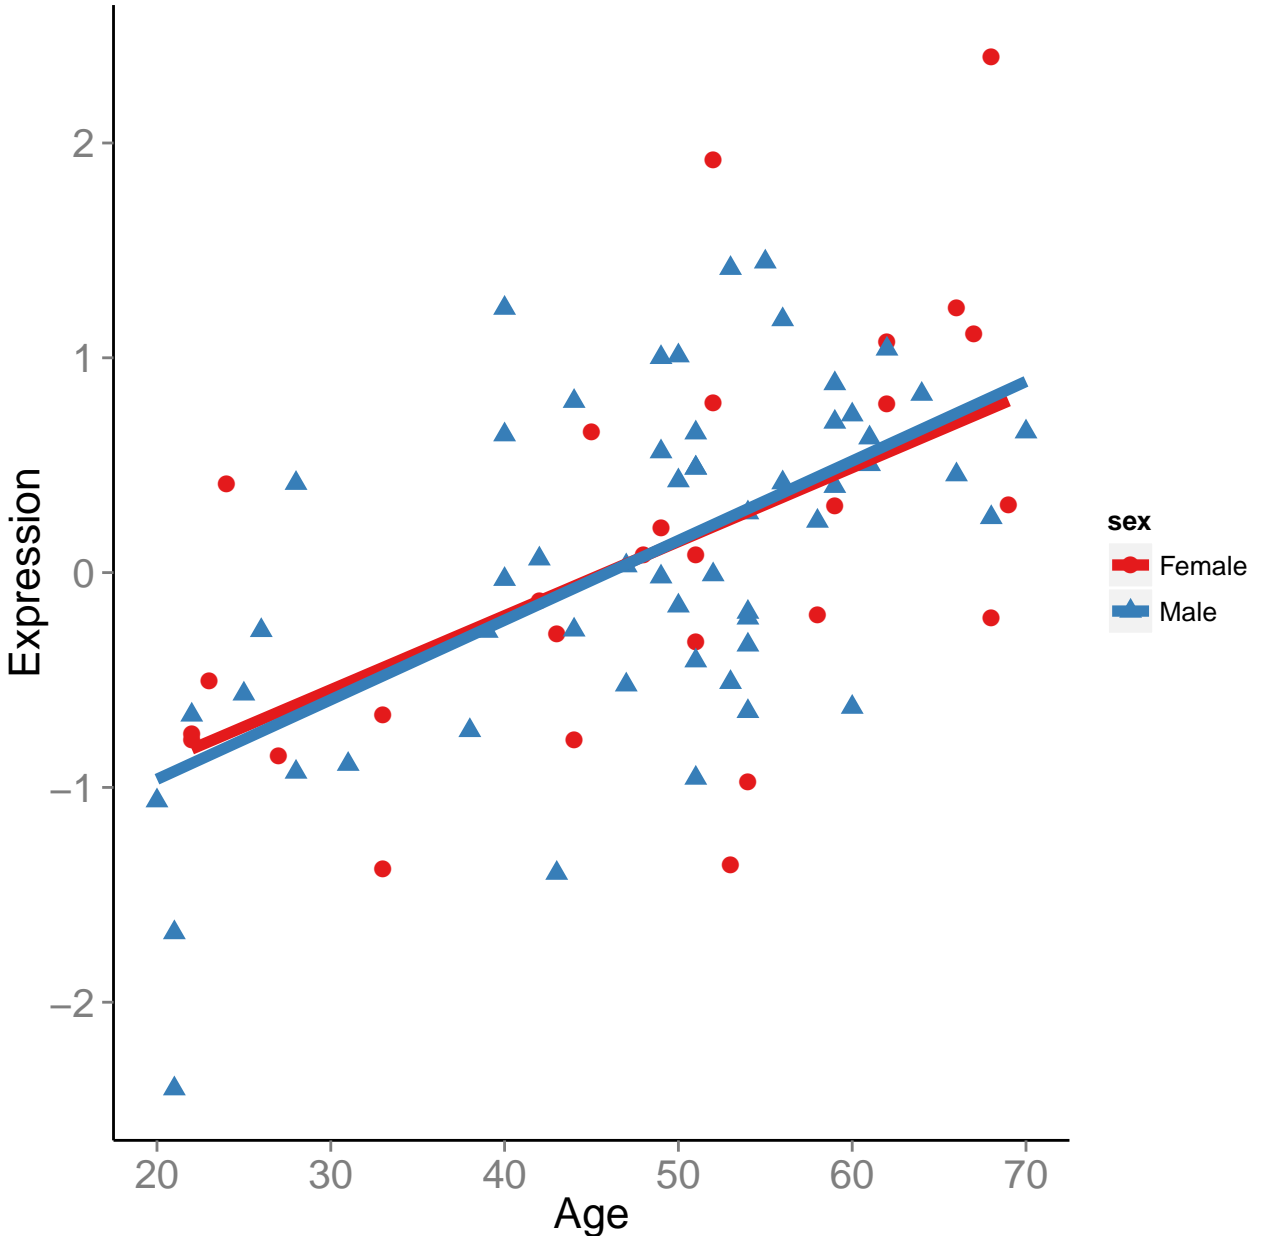

Heart: CEBPB Pearson-R=0.56 Pval=3.64E-08

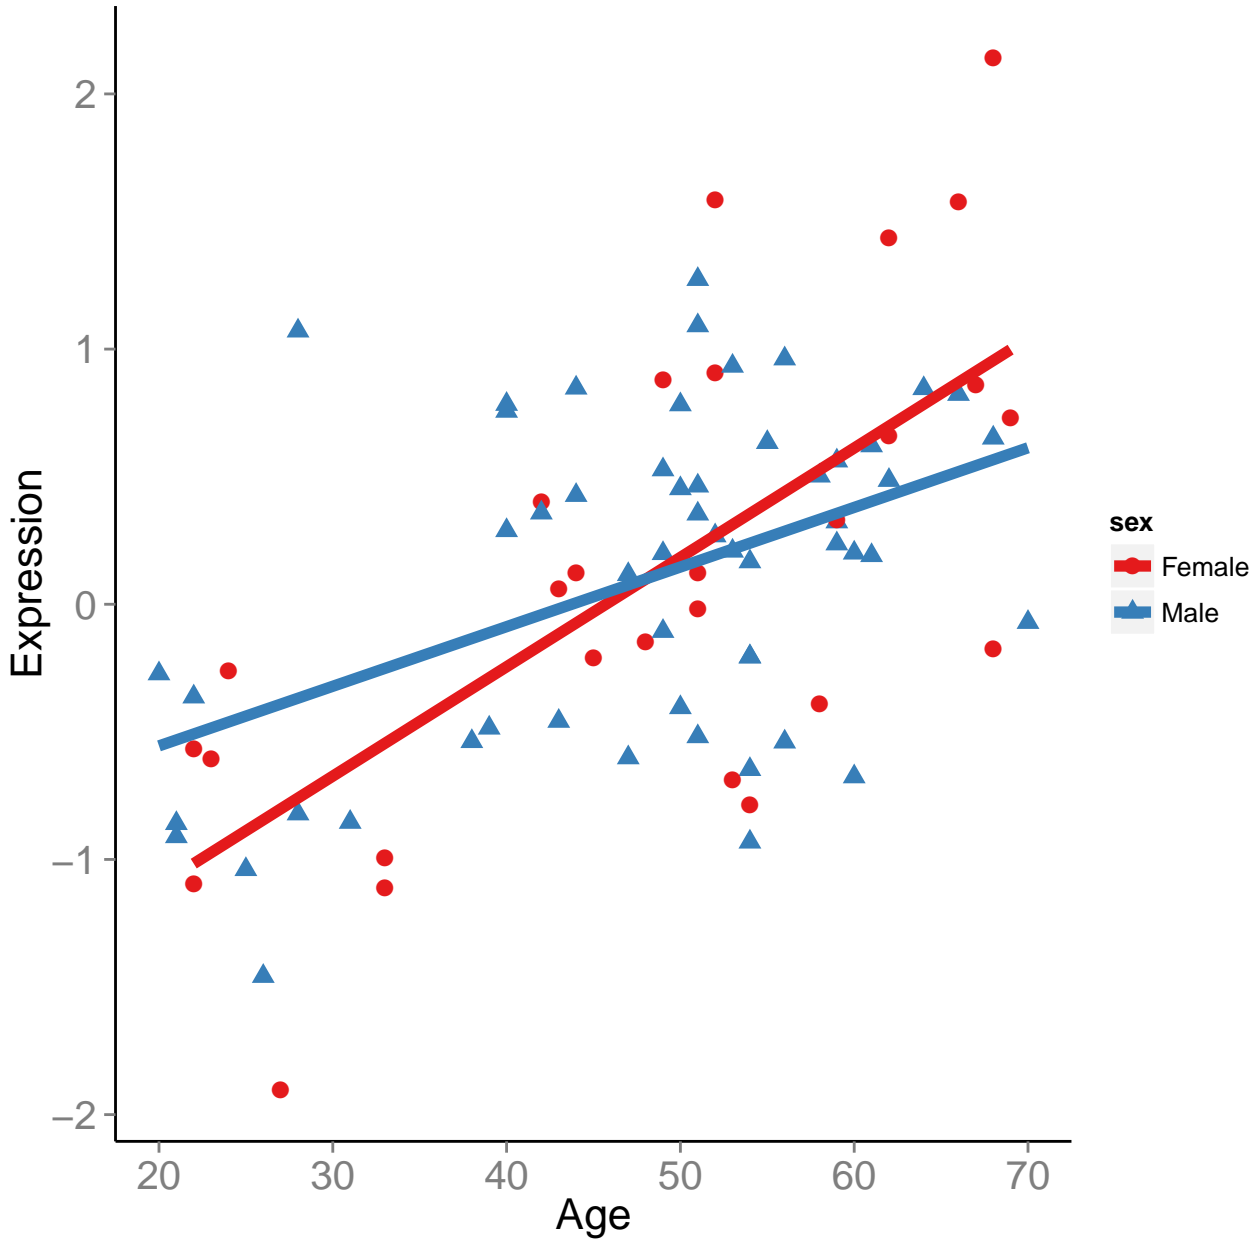

Heart: MAX Pearson-R=0.55 Pval=6.78E-08

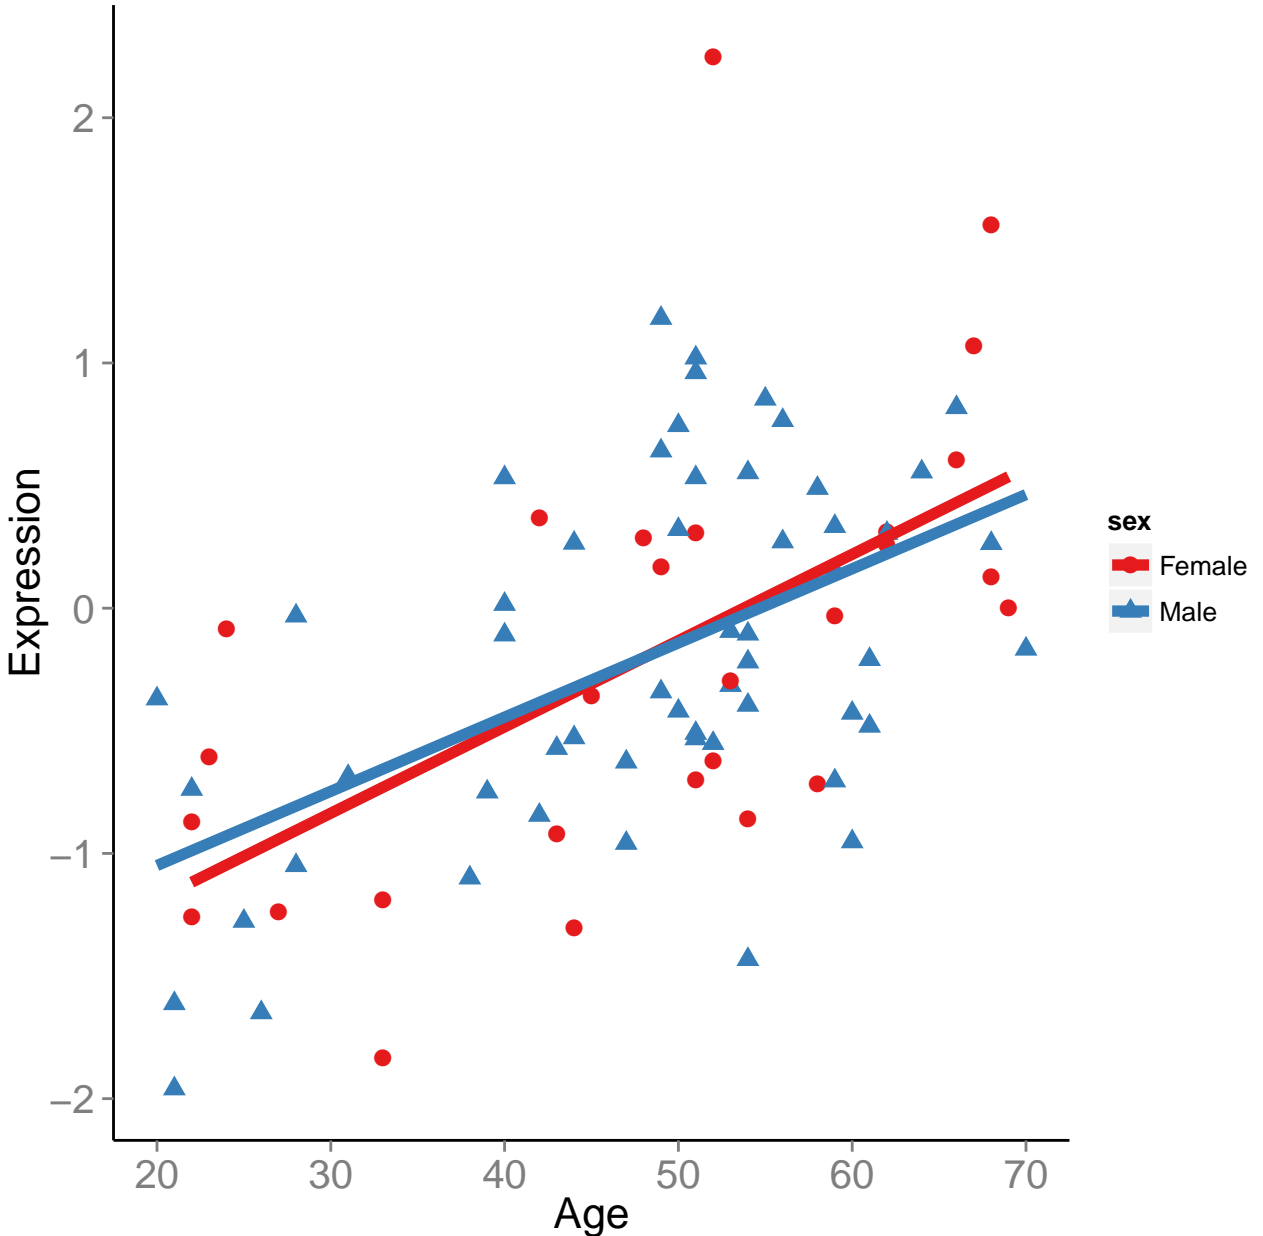

Heart: SNX24 Pearson-R=-0.55 Pval=5.71E-08

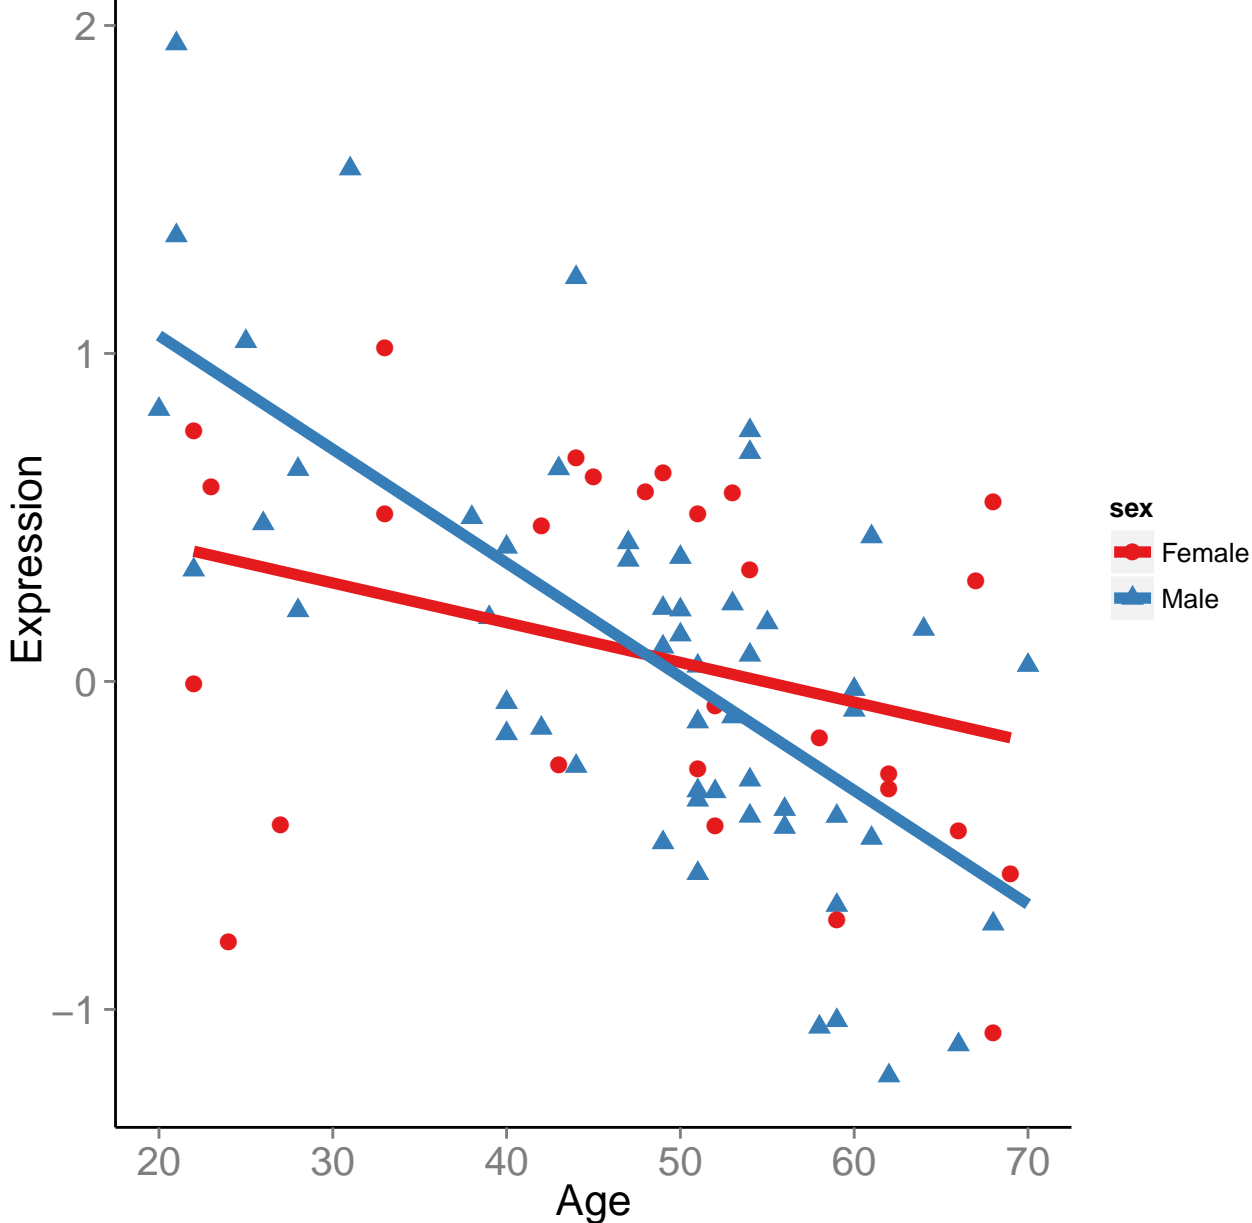



Heart: WDR77 Pearson-R=-0.55 Pval=9.38E-08

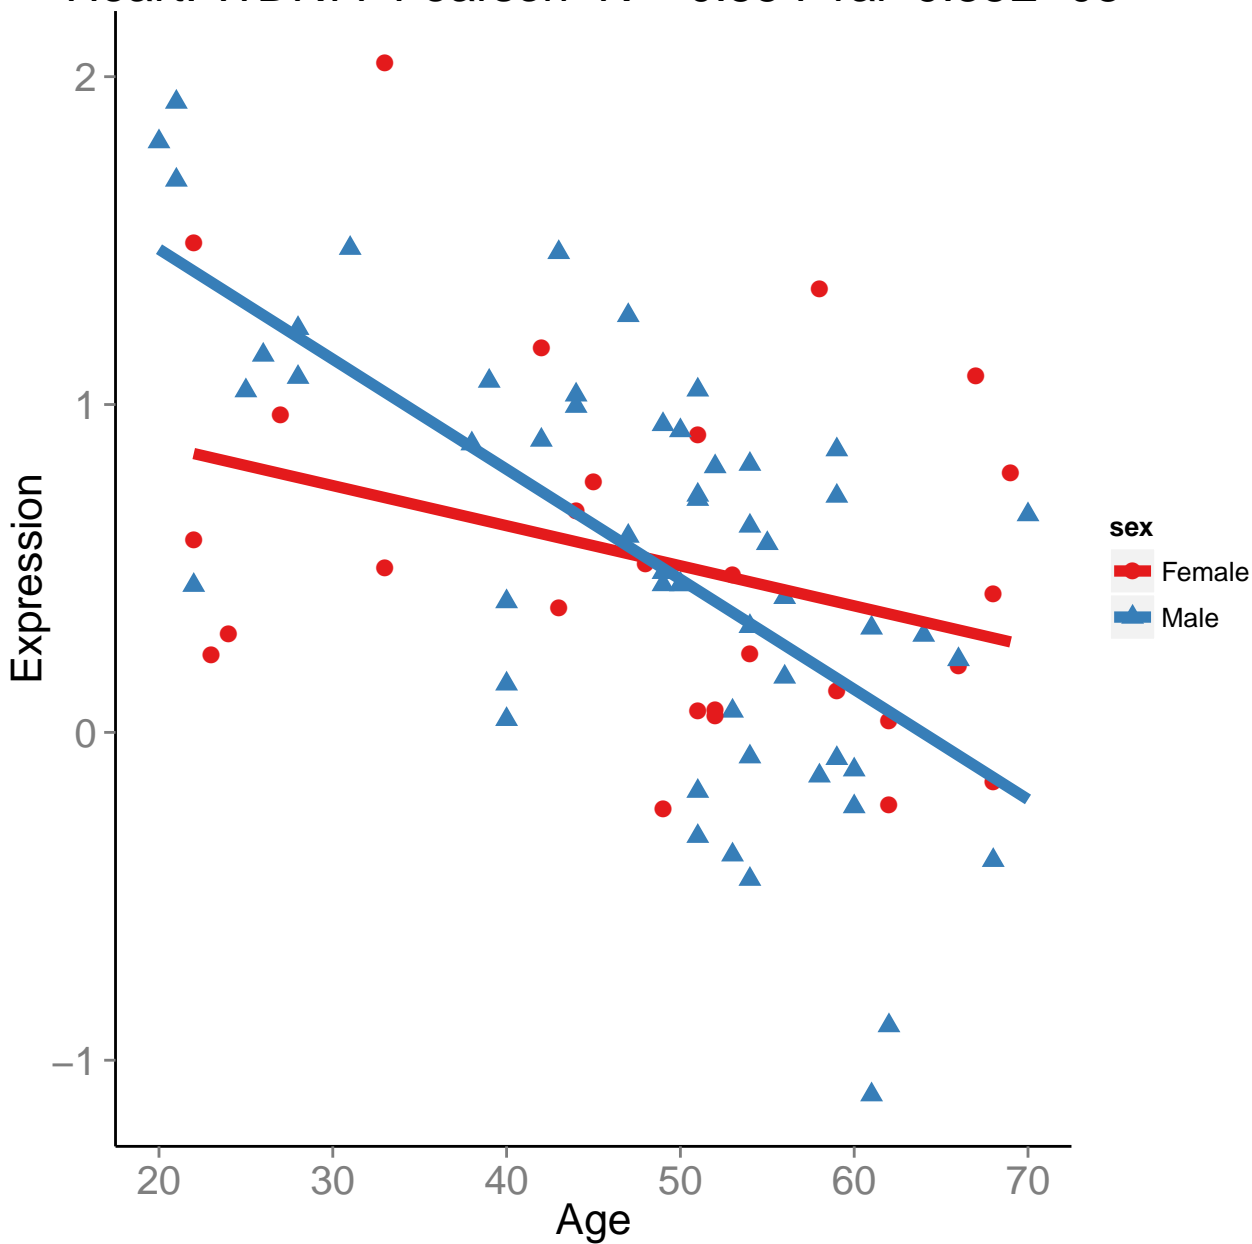

Heart: TTLL12 Pearson-R=0.54 Pval=1.07E-07

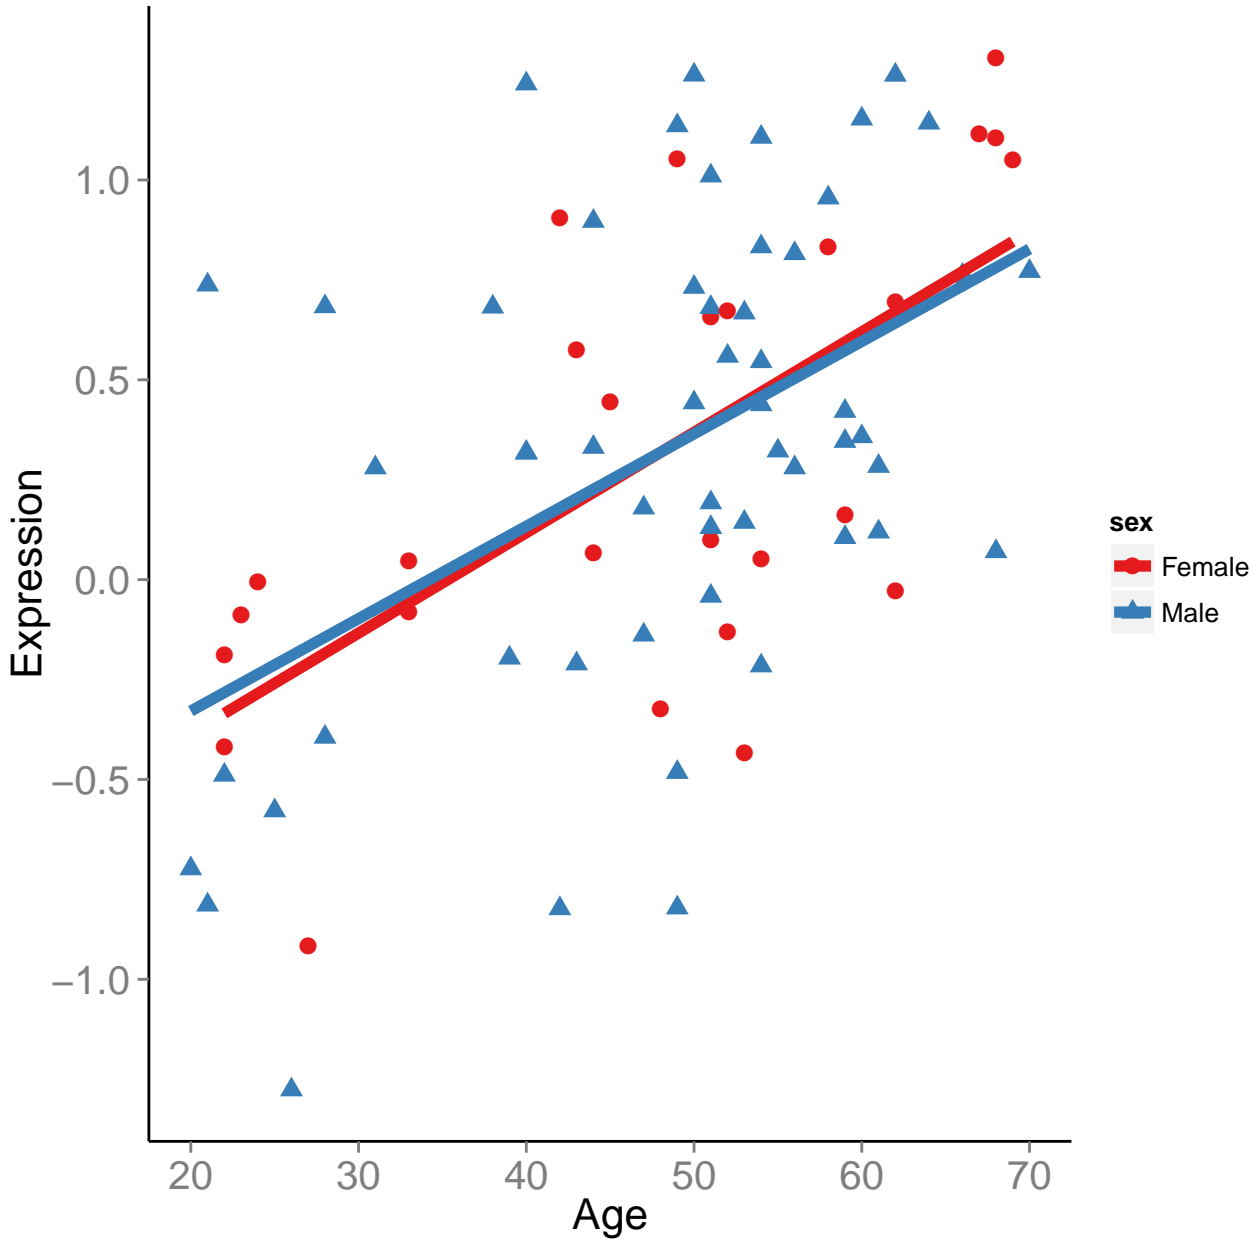

Heart: C10orf26 Pearson-R=0.54 Pval=1.53E-07

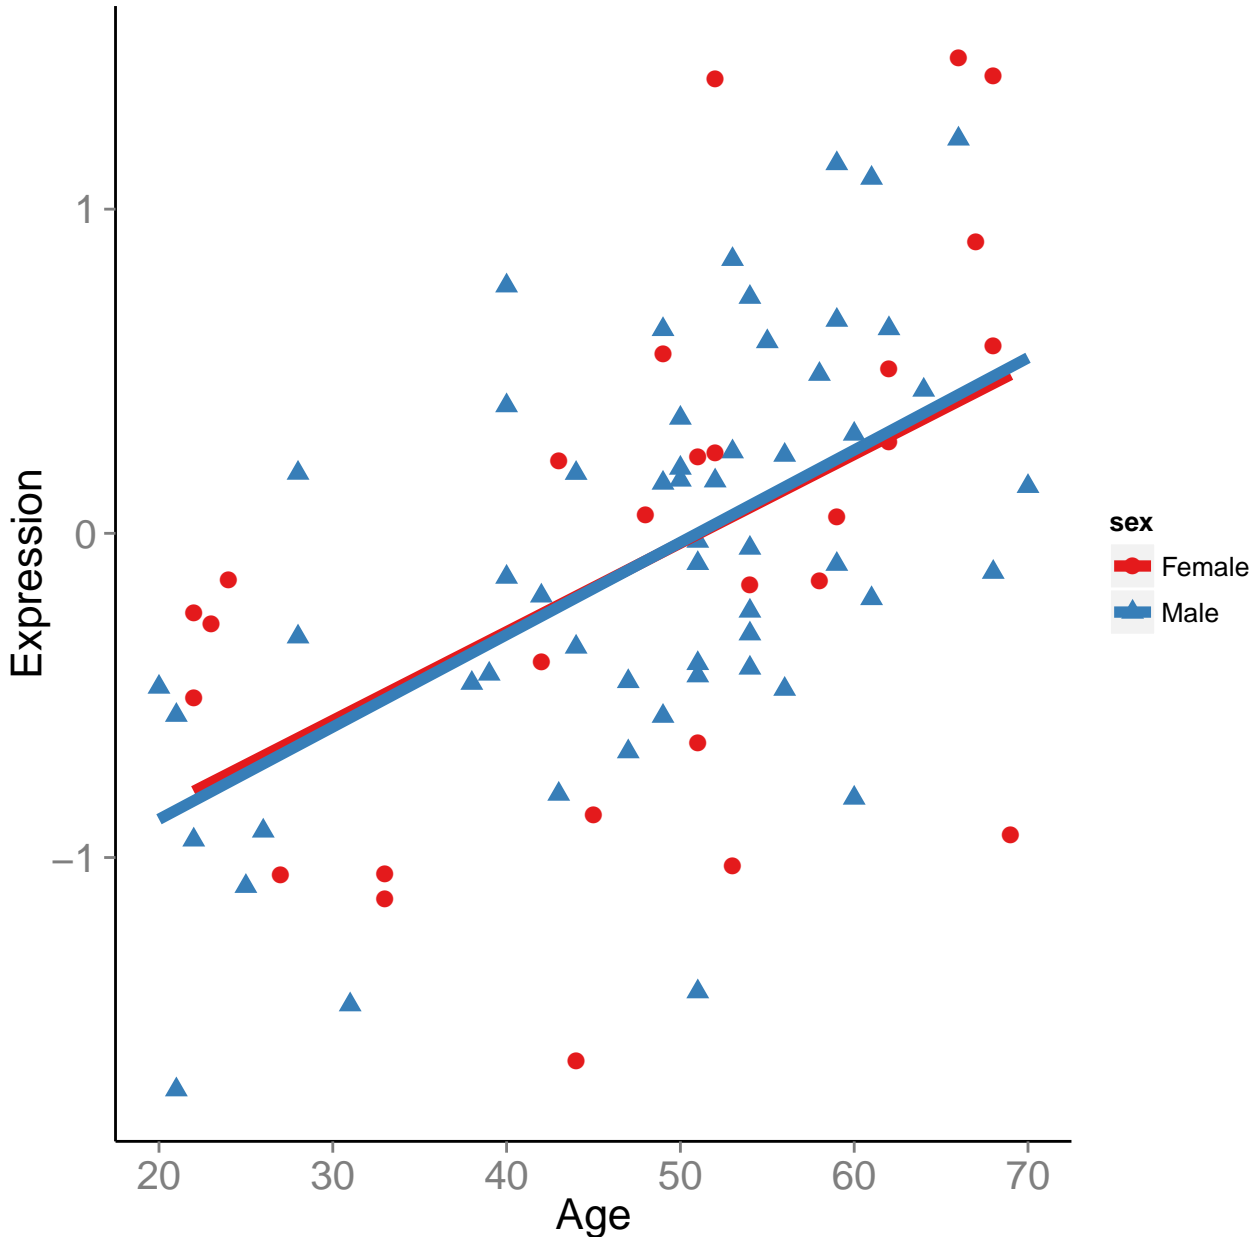

Heart: CSK Pearson-R=0.54 Pval=1.73E-07

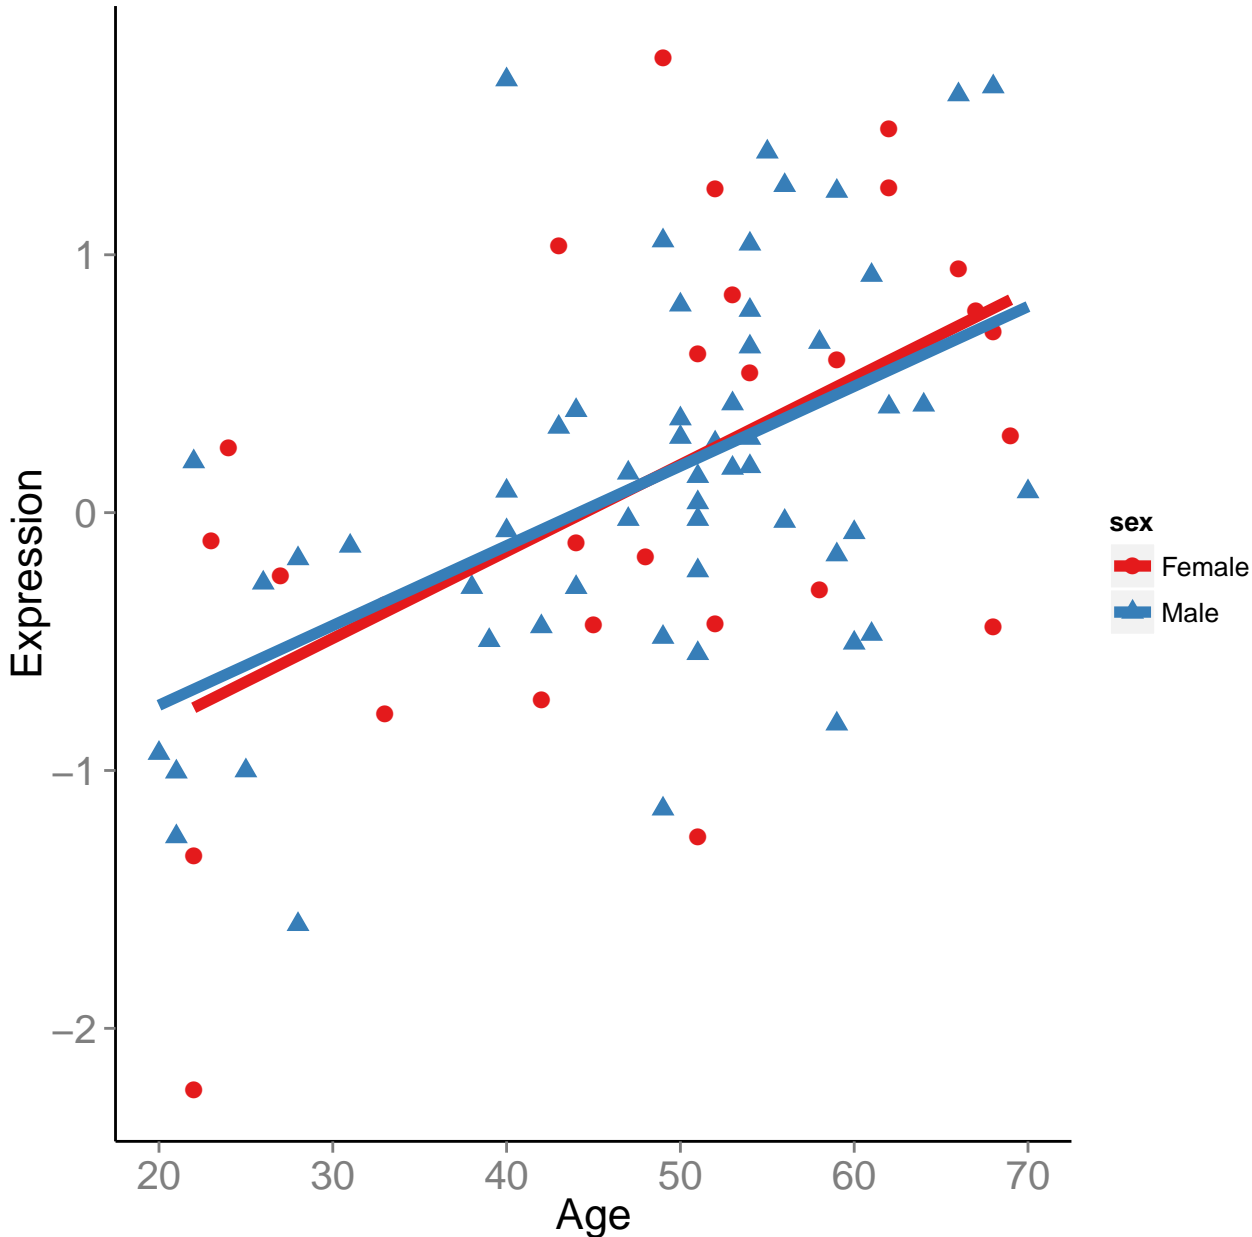

Heart: CALM2 Pearson-R=-0.53 Pval=2.51E-07

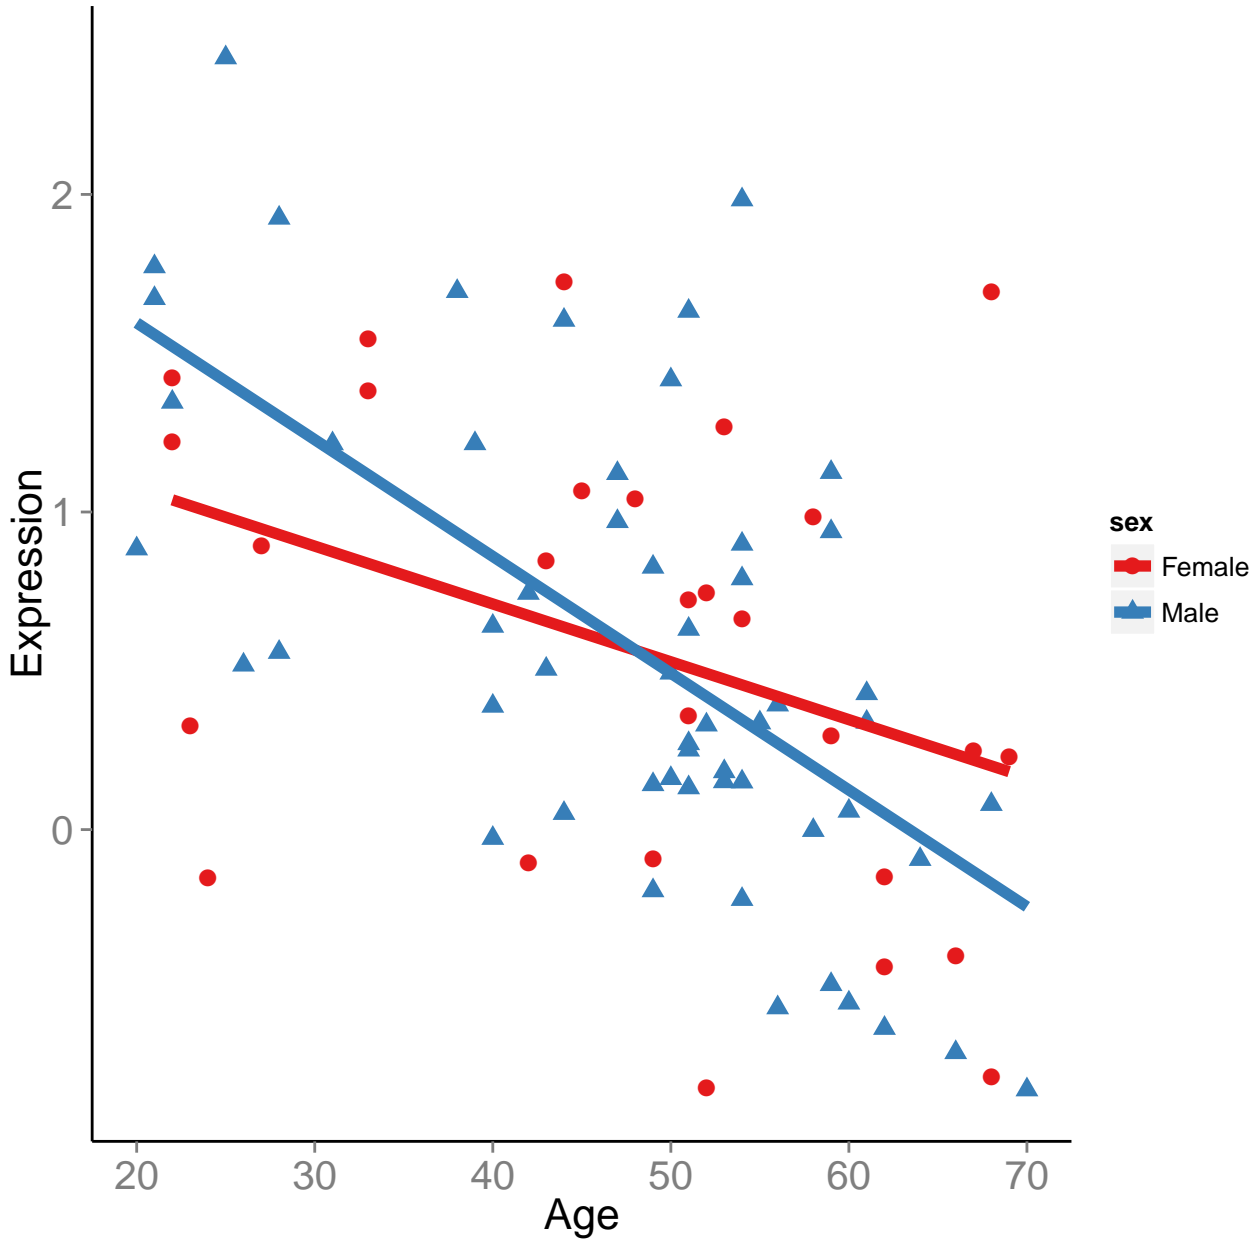

Heart: ZNF558 Pearson-R=0.52 Pval=4.03E-07

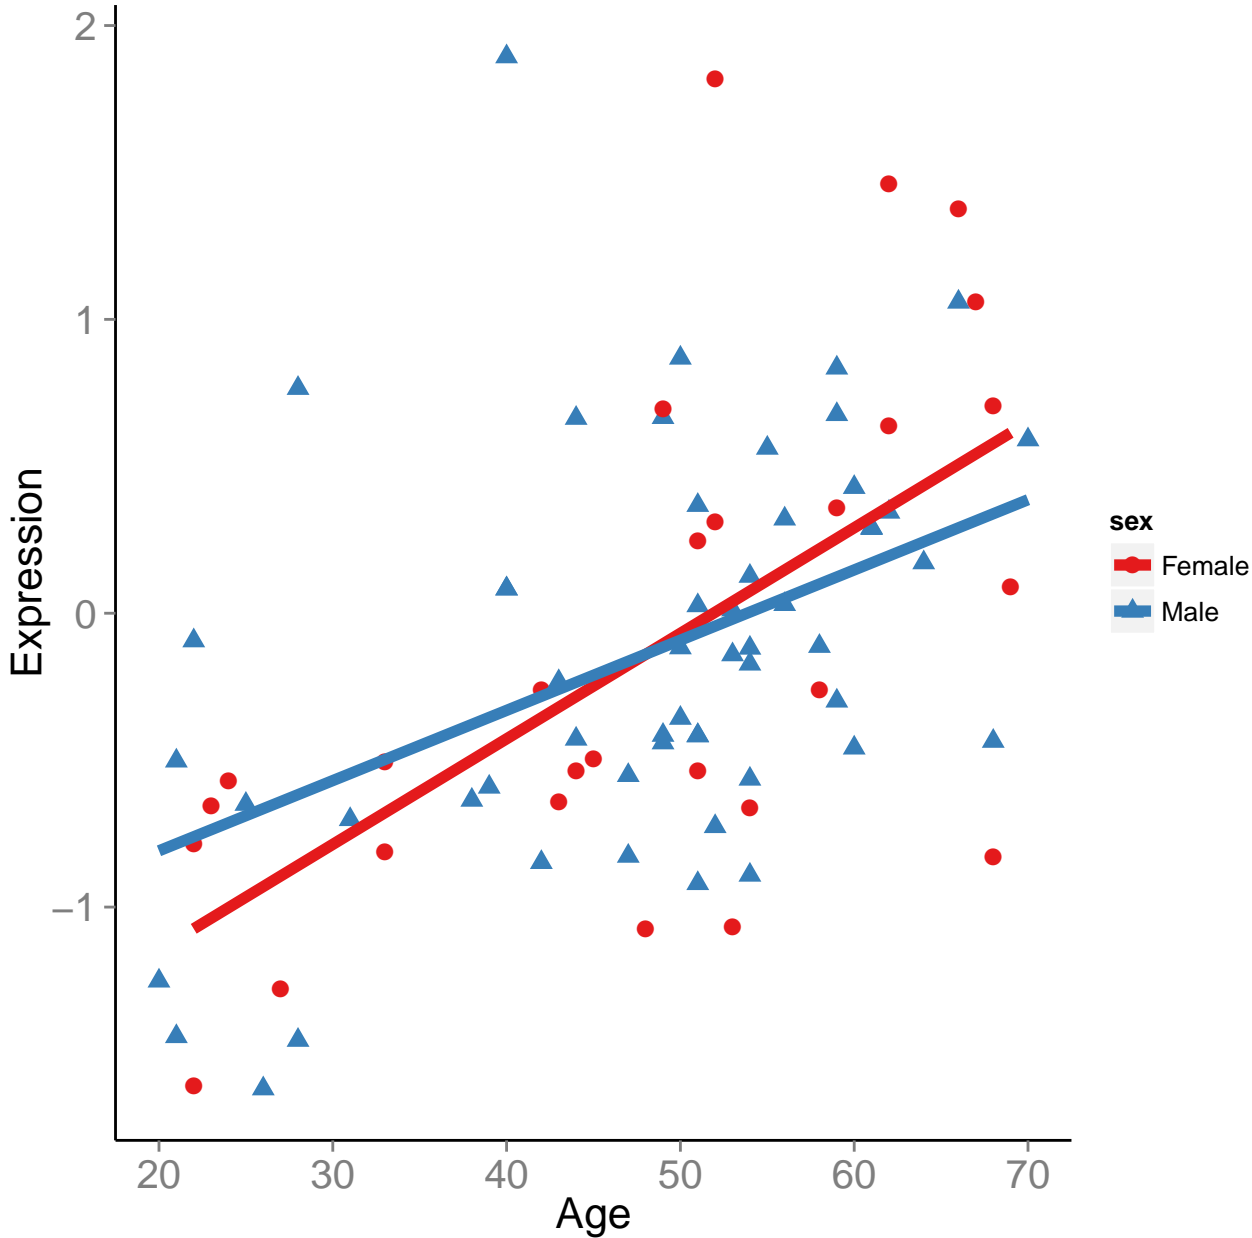

Heart: NCOA5 Pearson-R=0.52 Pval=4.44E-07

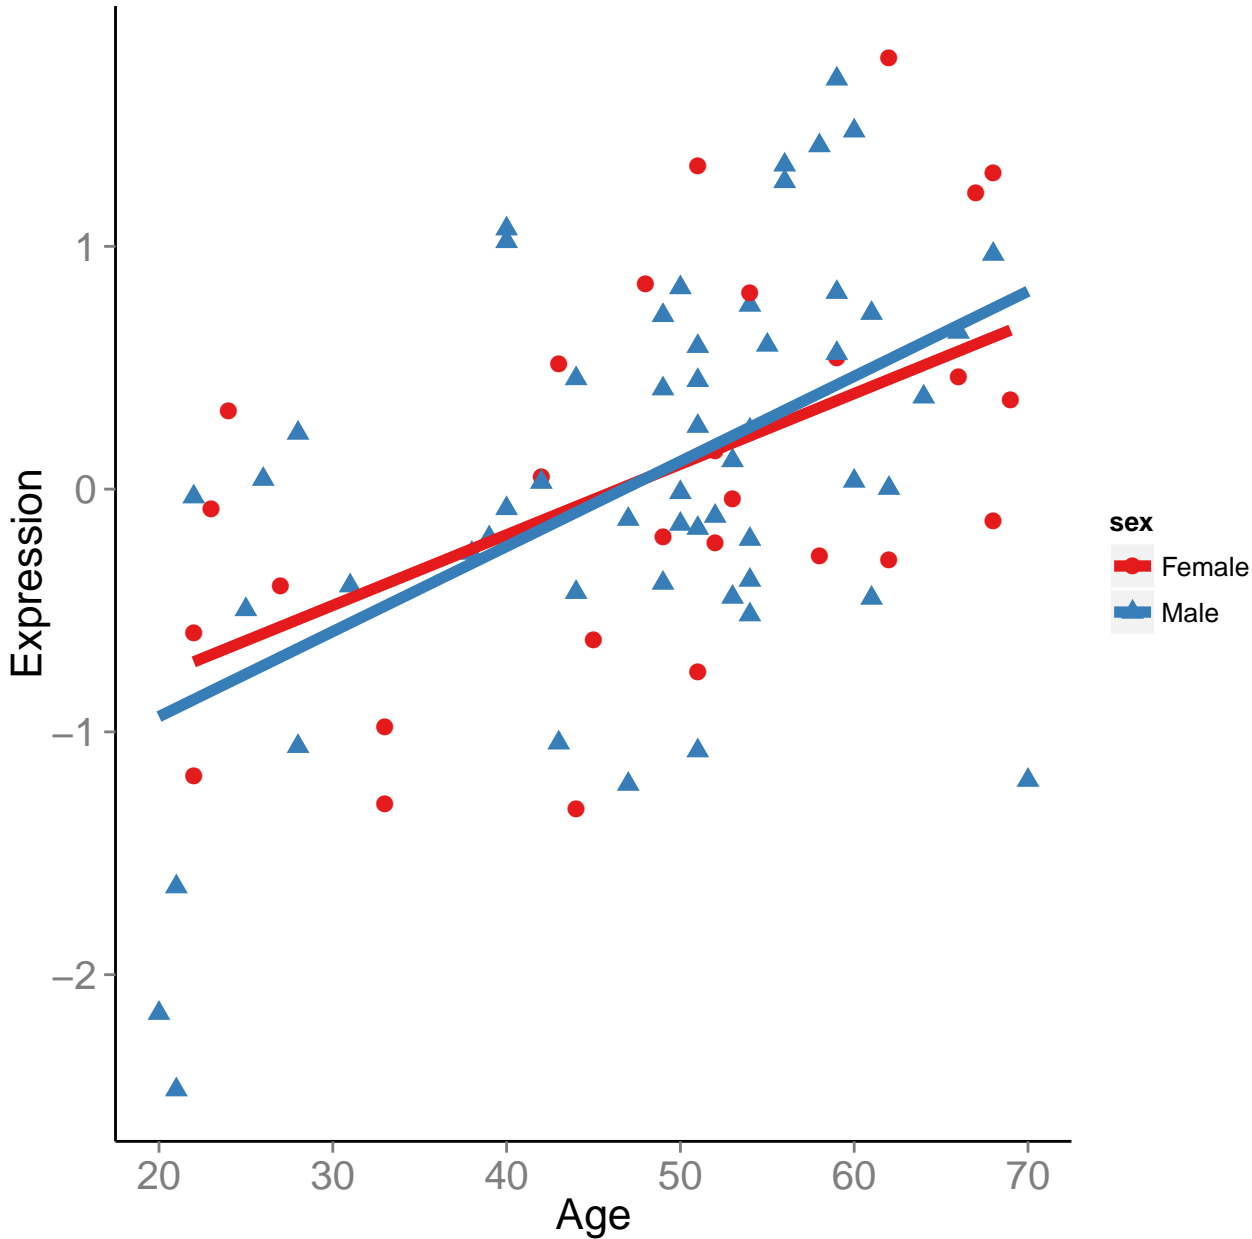

Heart: HINFP Pearson-R=0.53 Pval=3.44E-07

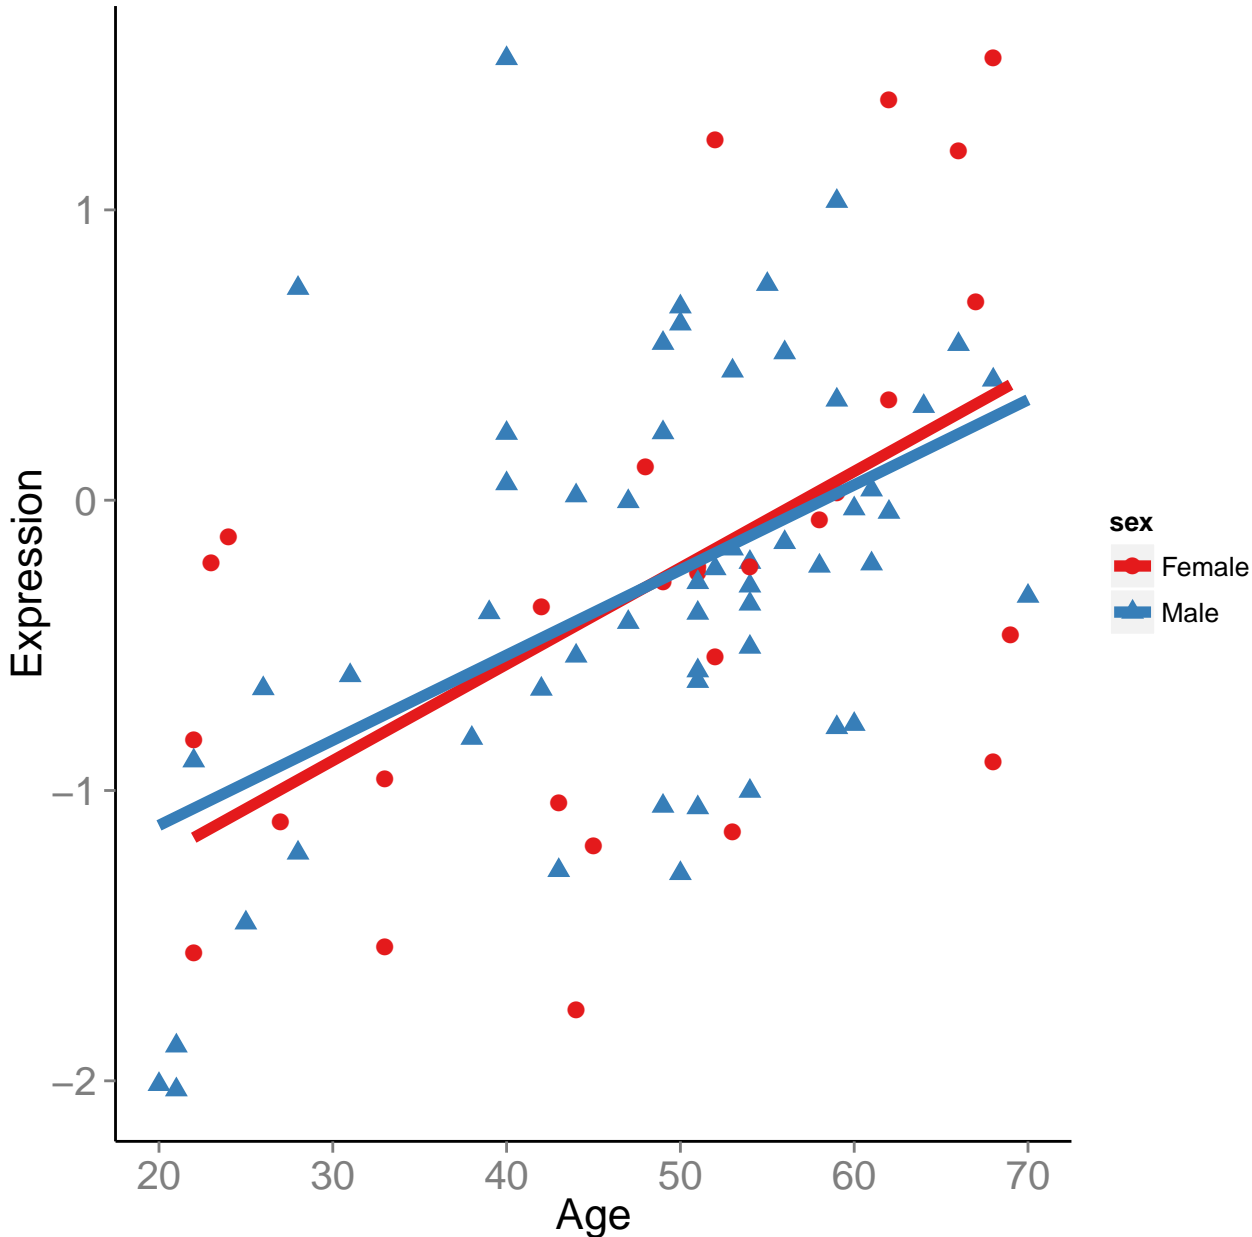



Heart: DCTN6 Pearson-R=-0.52 Pval=4.32E-07

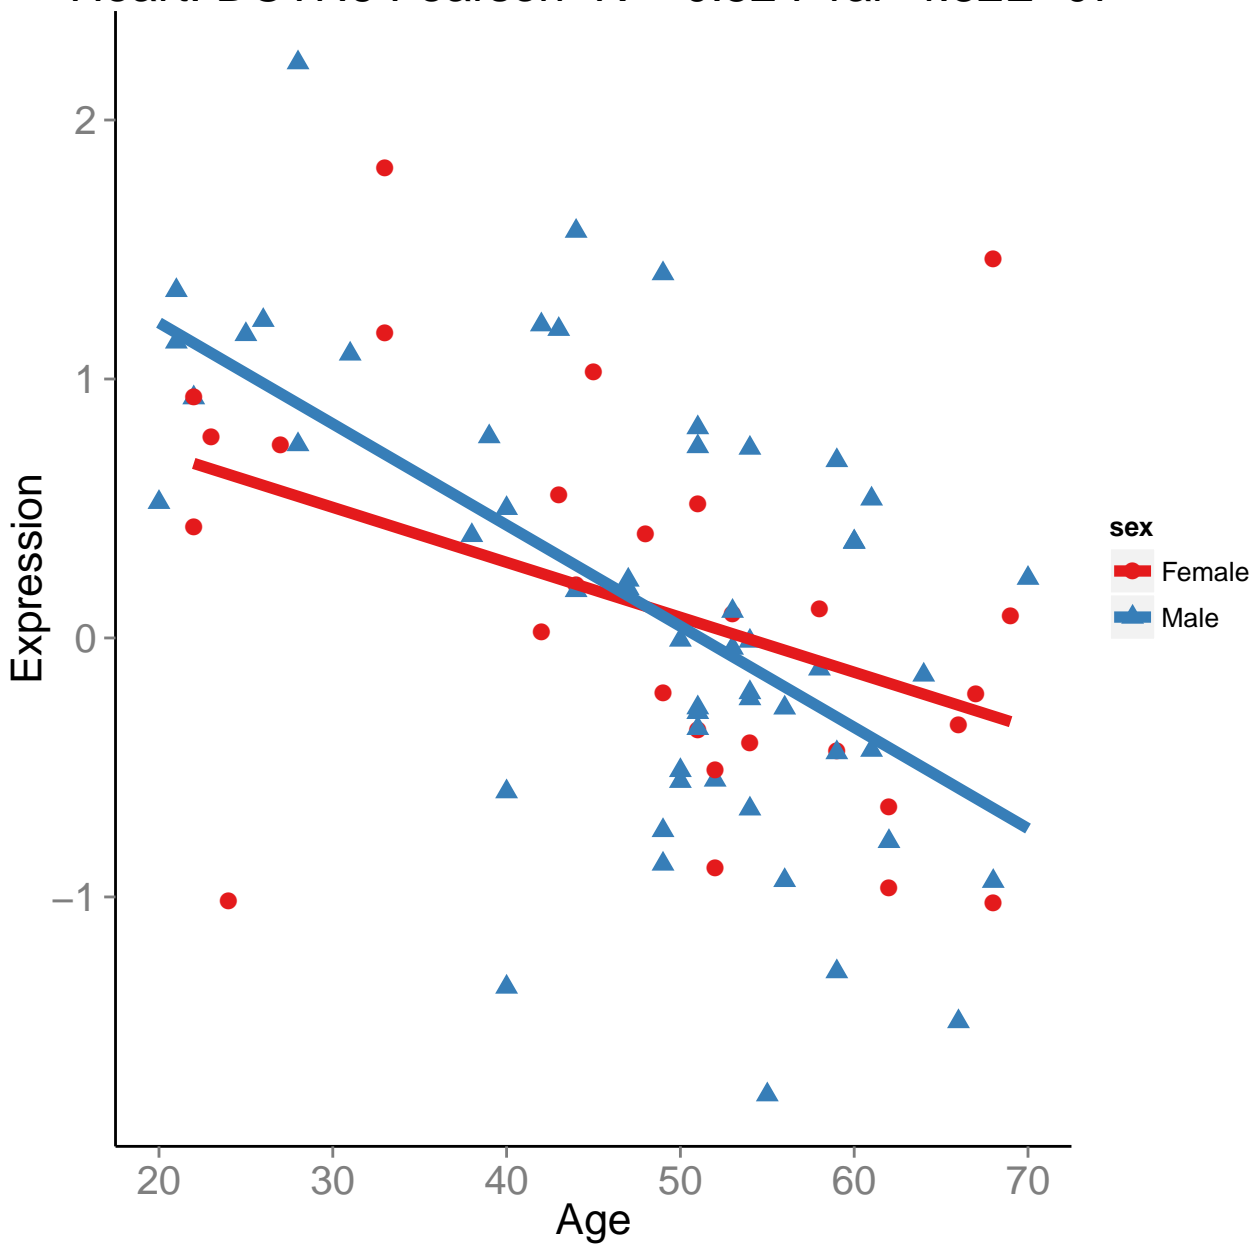

Heart: SSBP1 Pearson-R=-0.52 Pval=3.99E-07

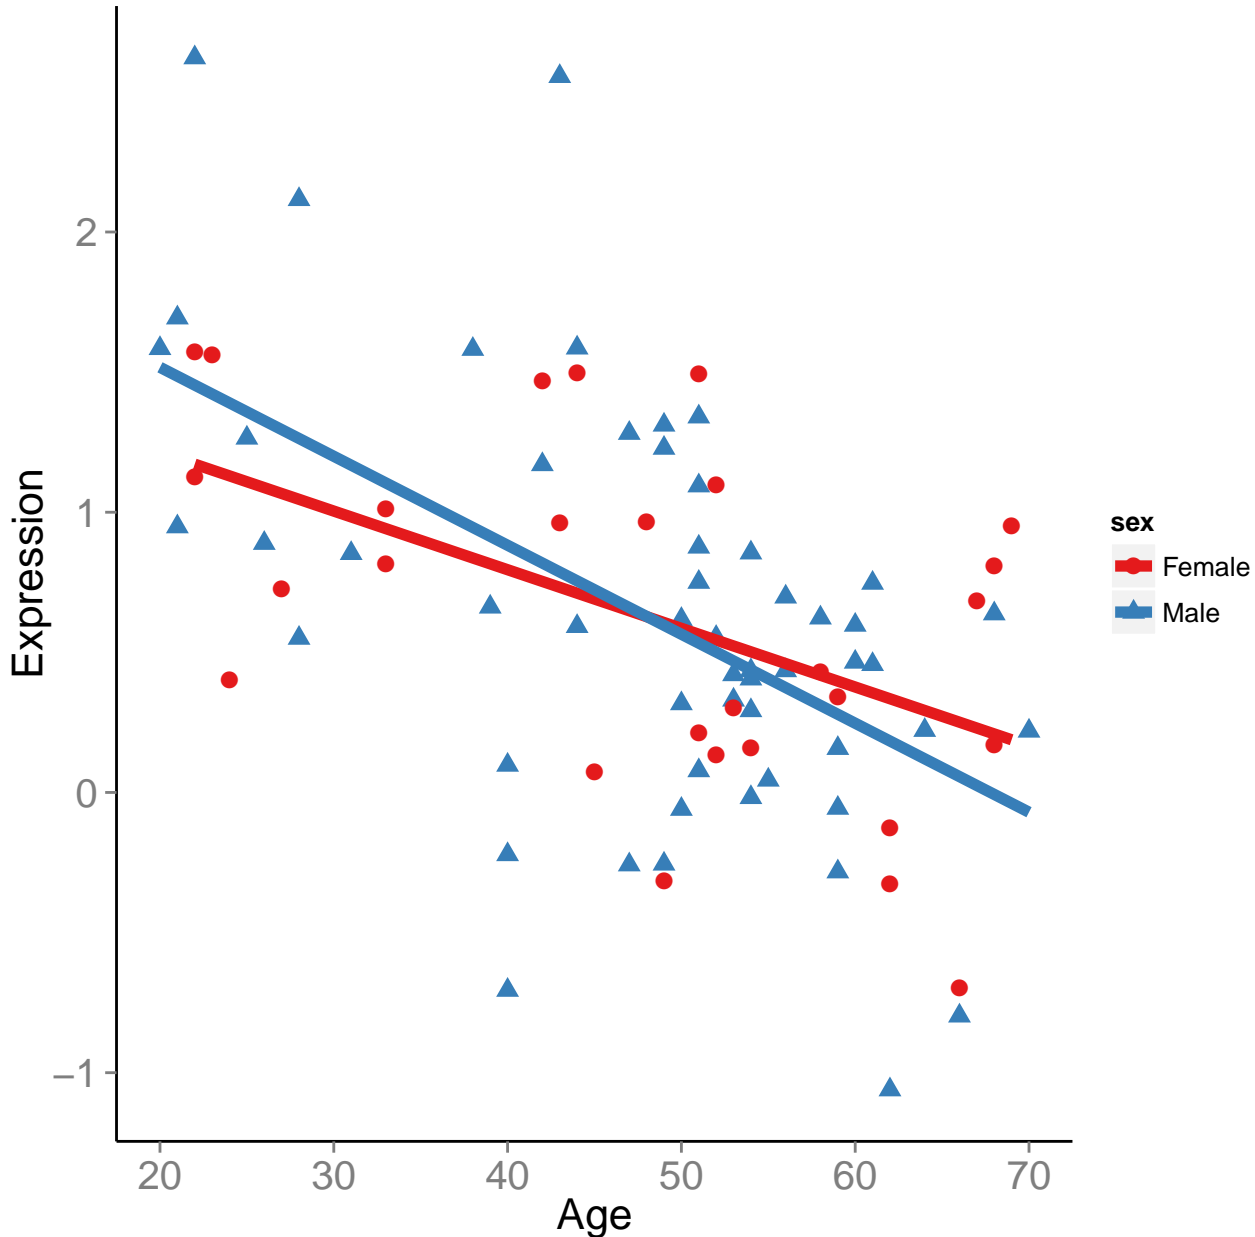

Heart: TMEM45A Pearson-R=0.52 Pval=5.06E-07

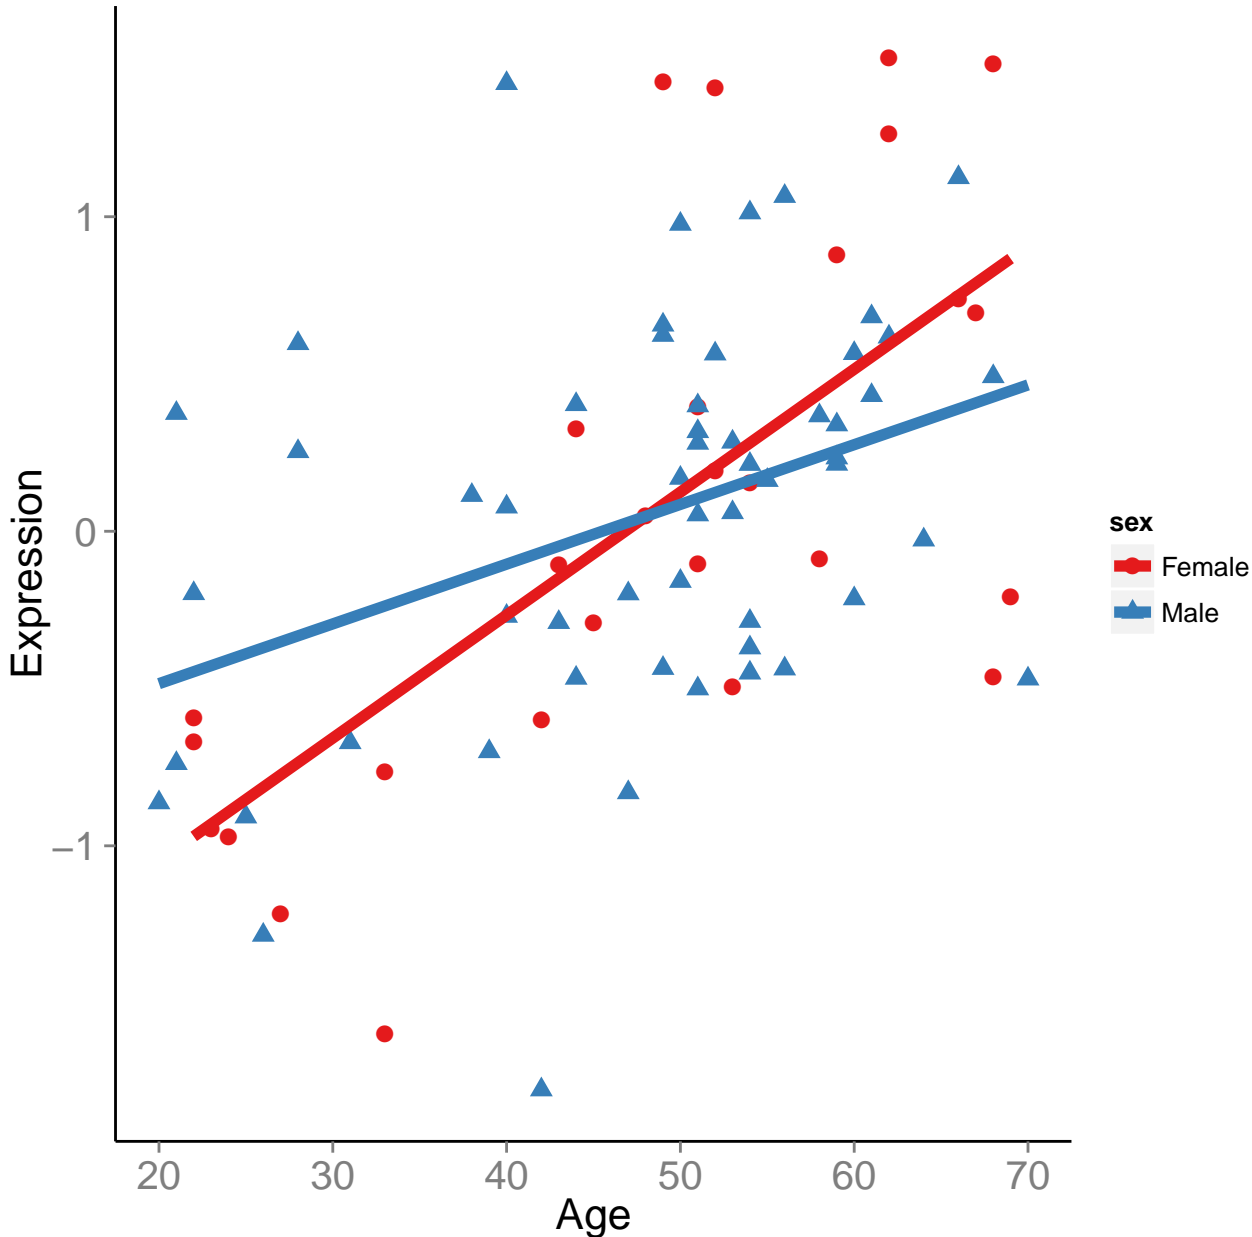

Heart: RHBDF2 Pearson-R=0.52 Pval=5.93E-07

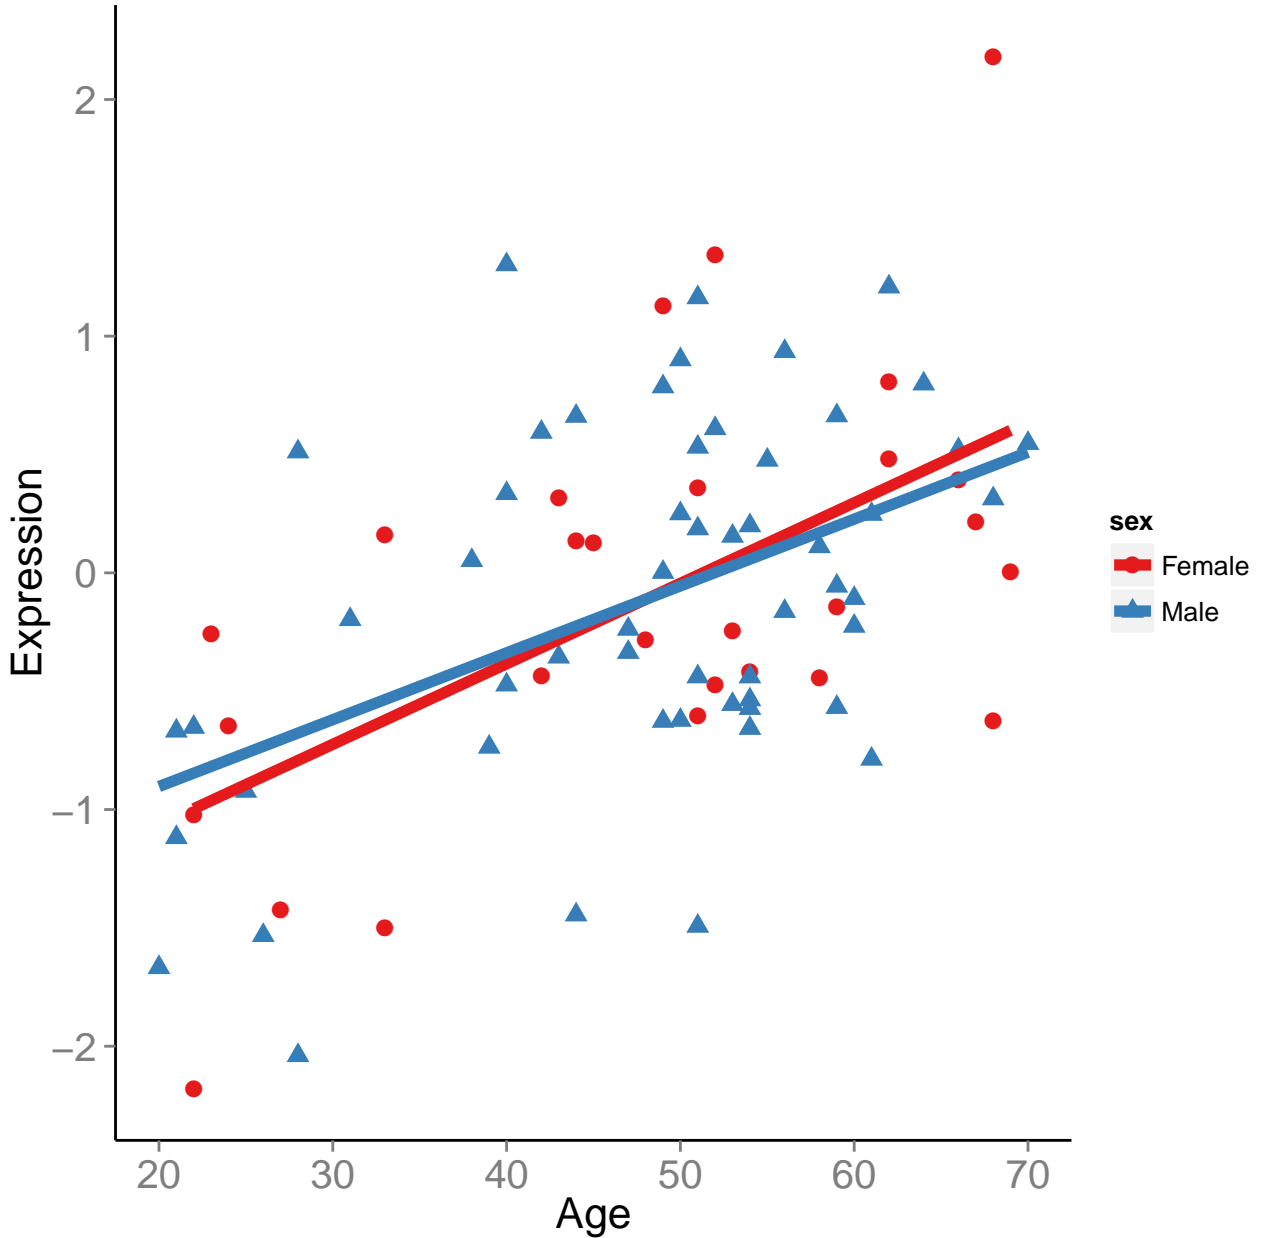

Heart: PPCS Pearson-R=-0.52 Pval=5.80E-07

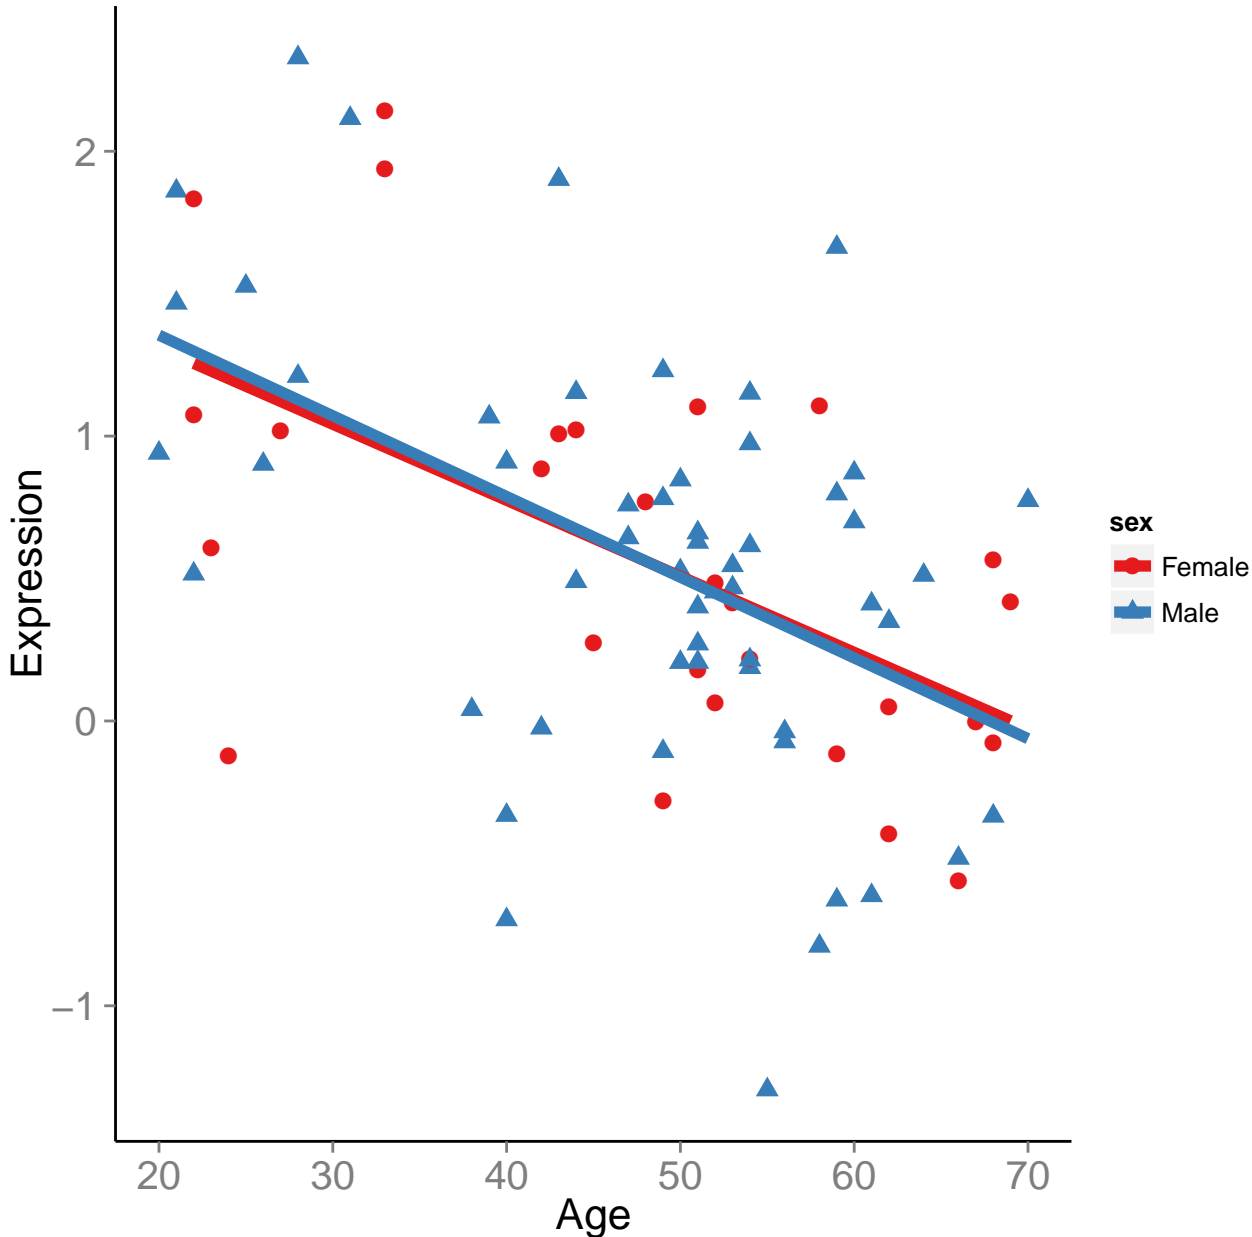

Heart: ANKZF1 Pearson-R=0.52 Pval=6.04E-07

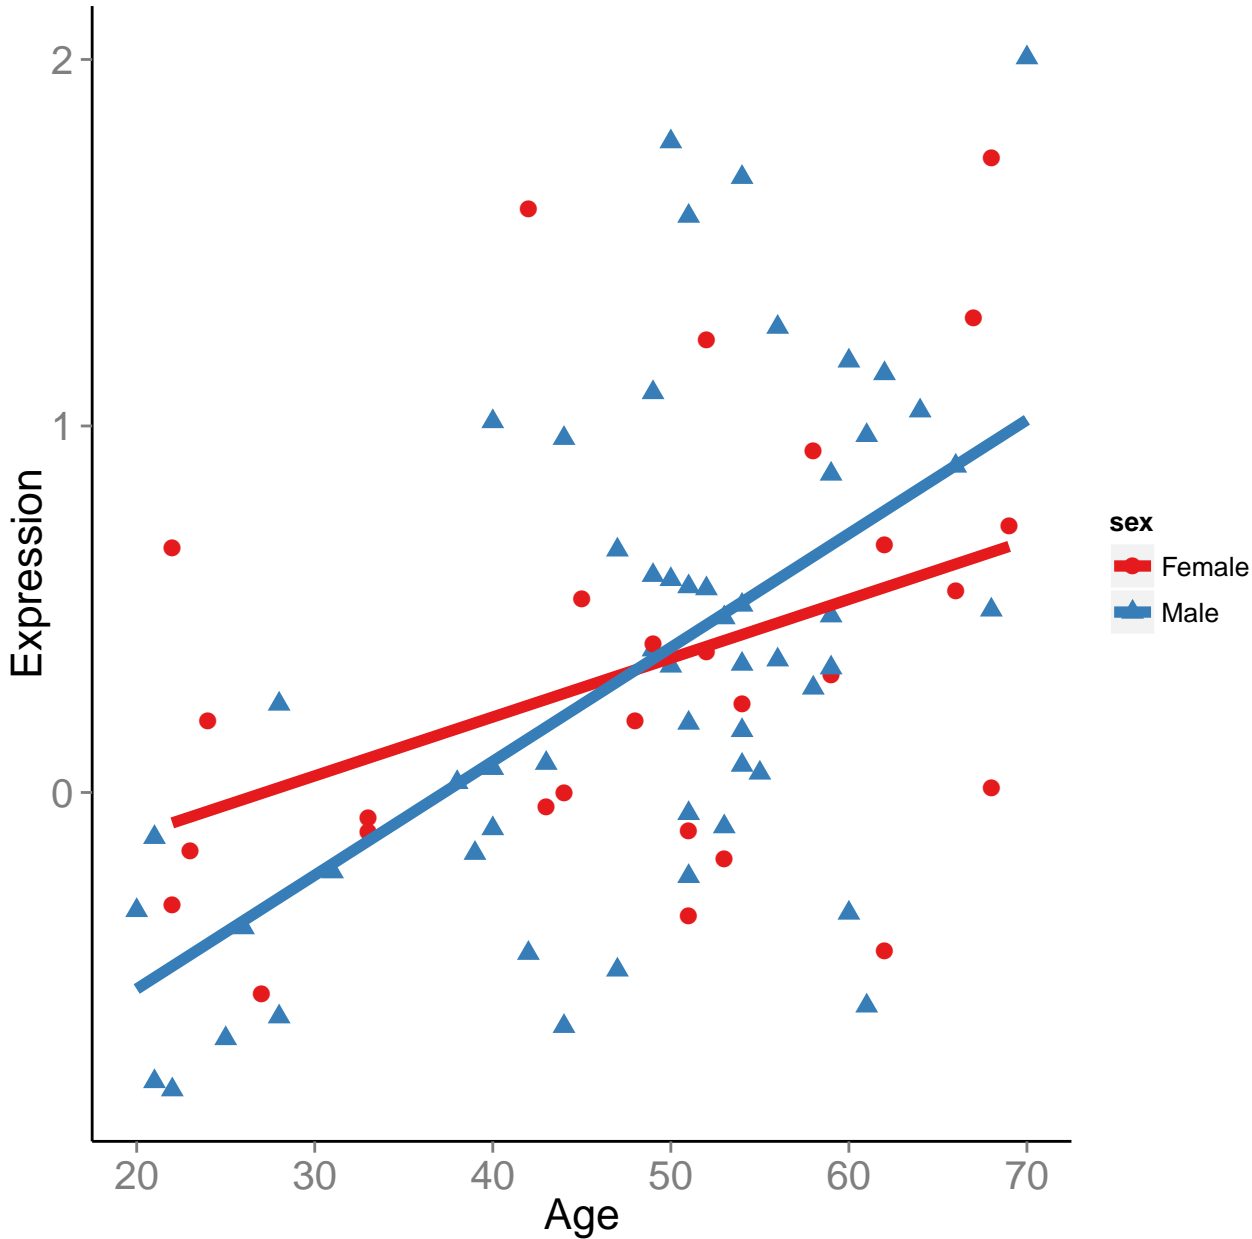

Heart: MERTK Pearson-R=0.51 Pval=8.03E-07

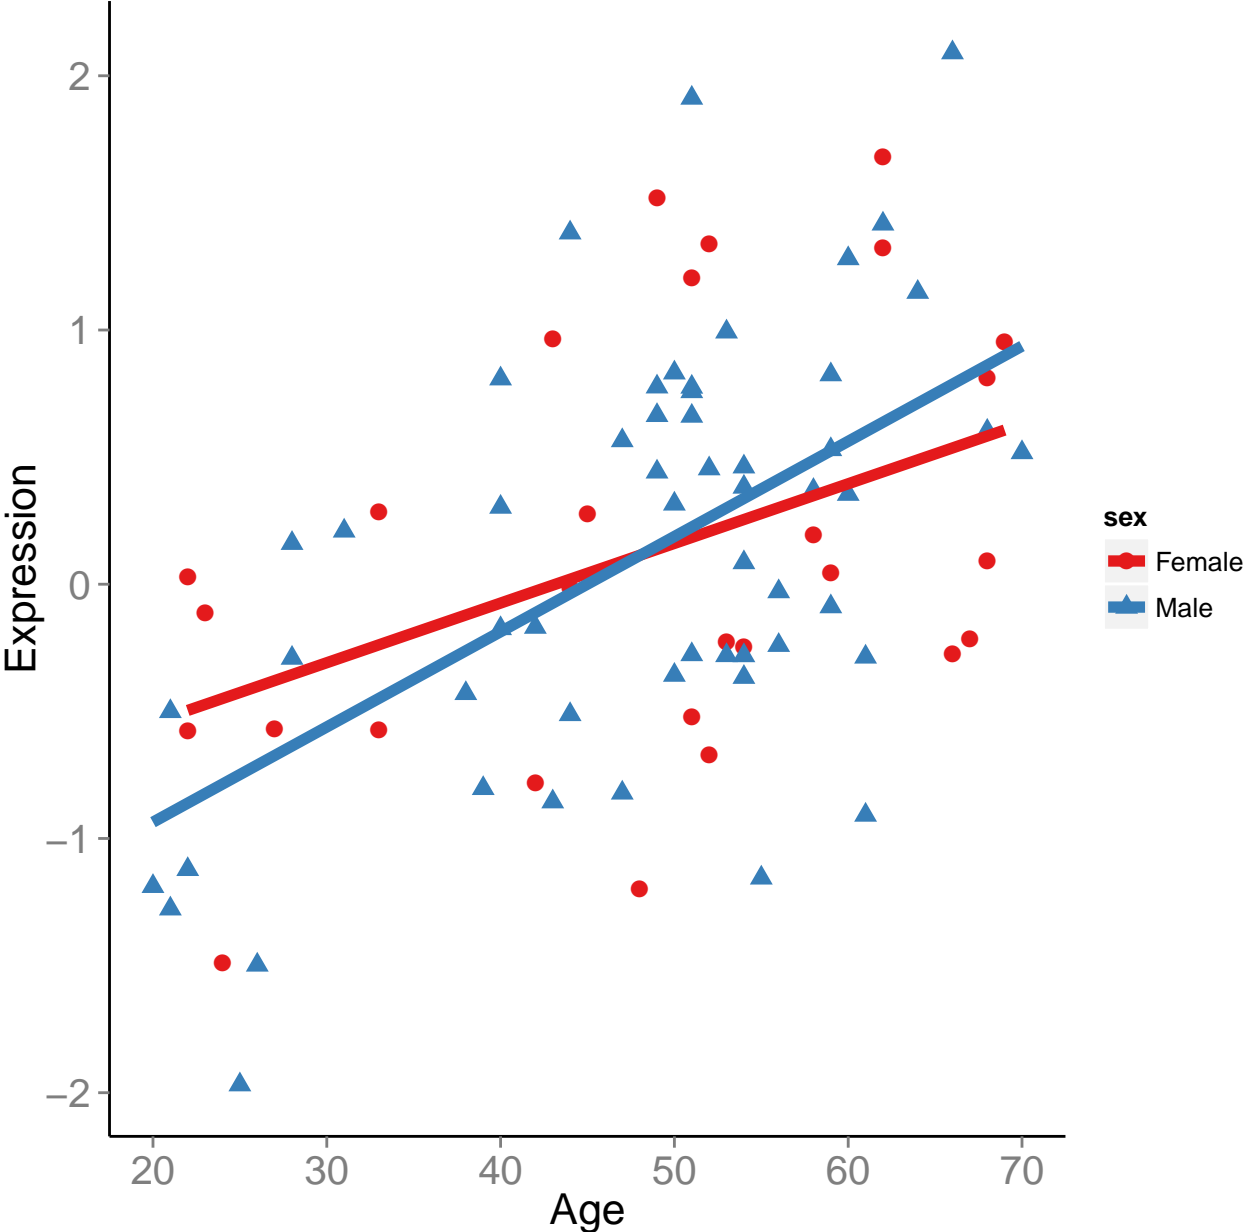

Heart: PRR14L Pearson-R=0.51 Pval=8.29E-07

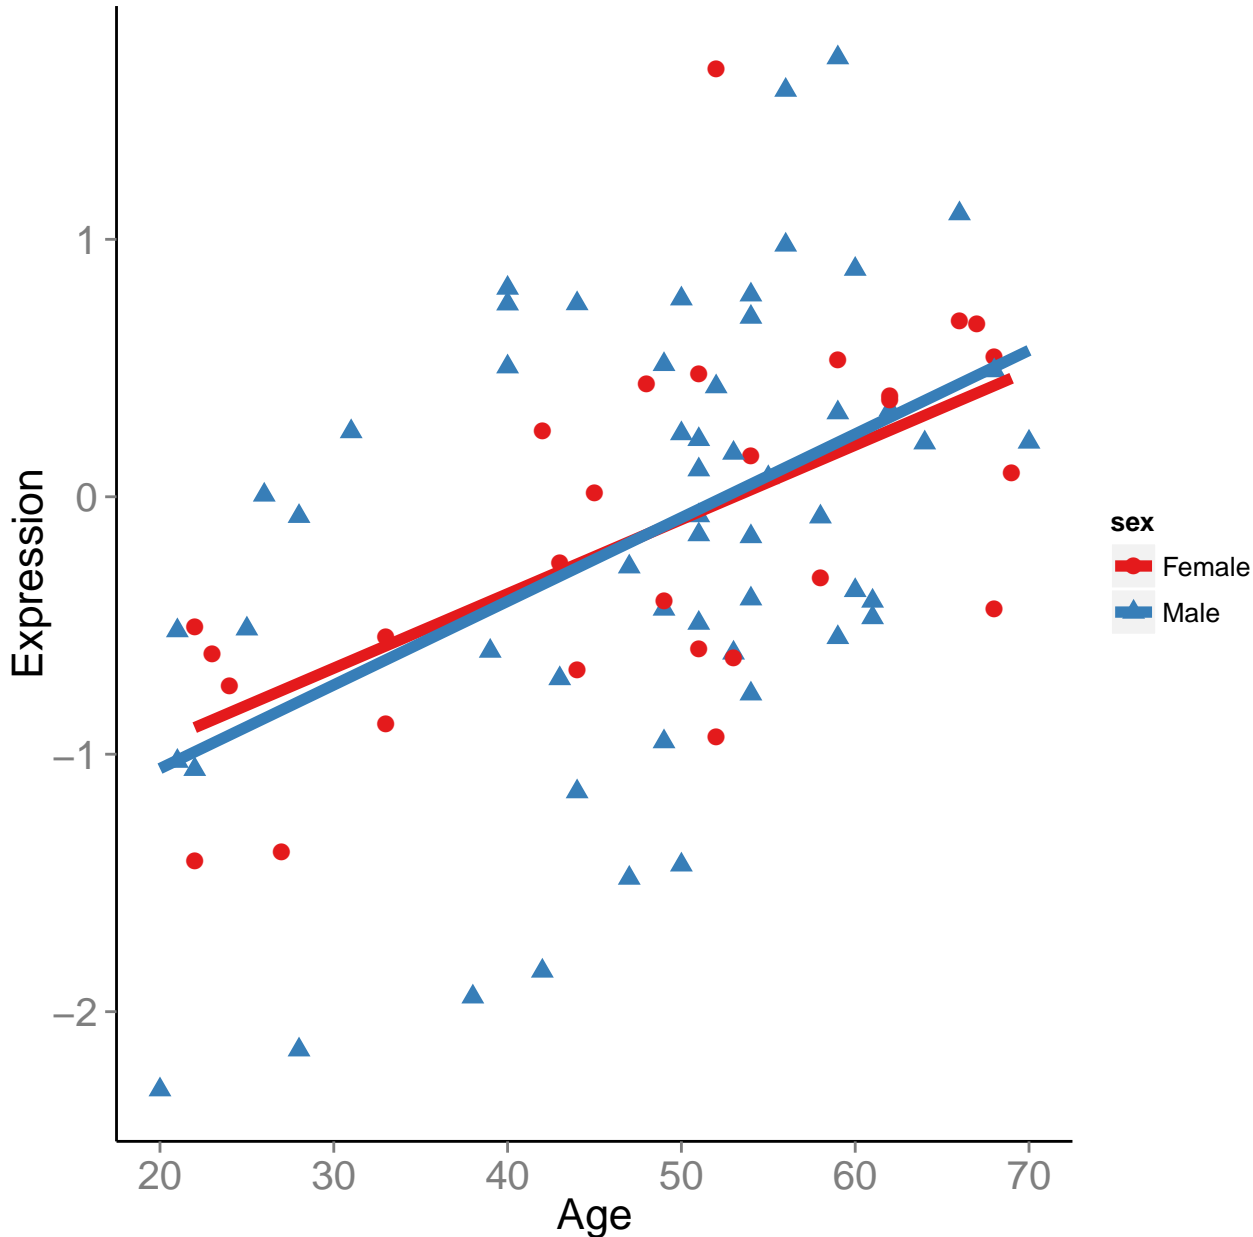



Heart: TWISTNB Pearson-R=-0.51 Pval=8.04E-07

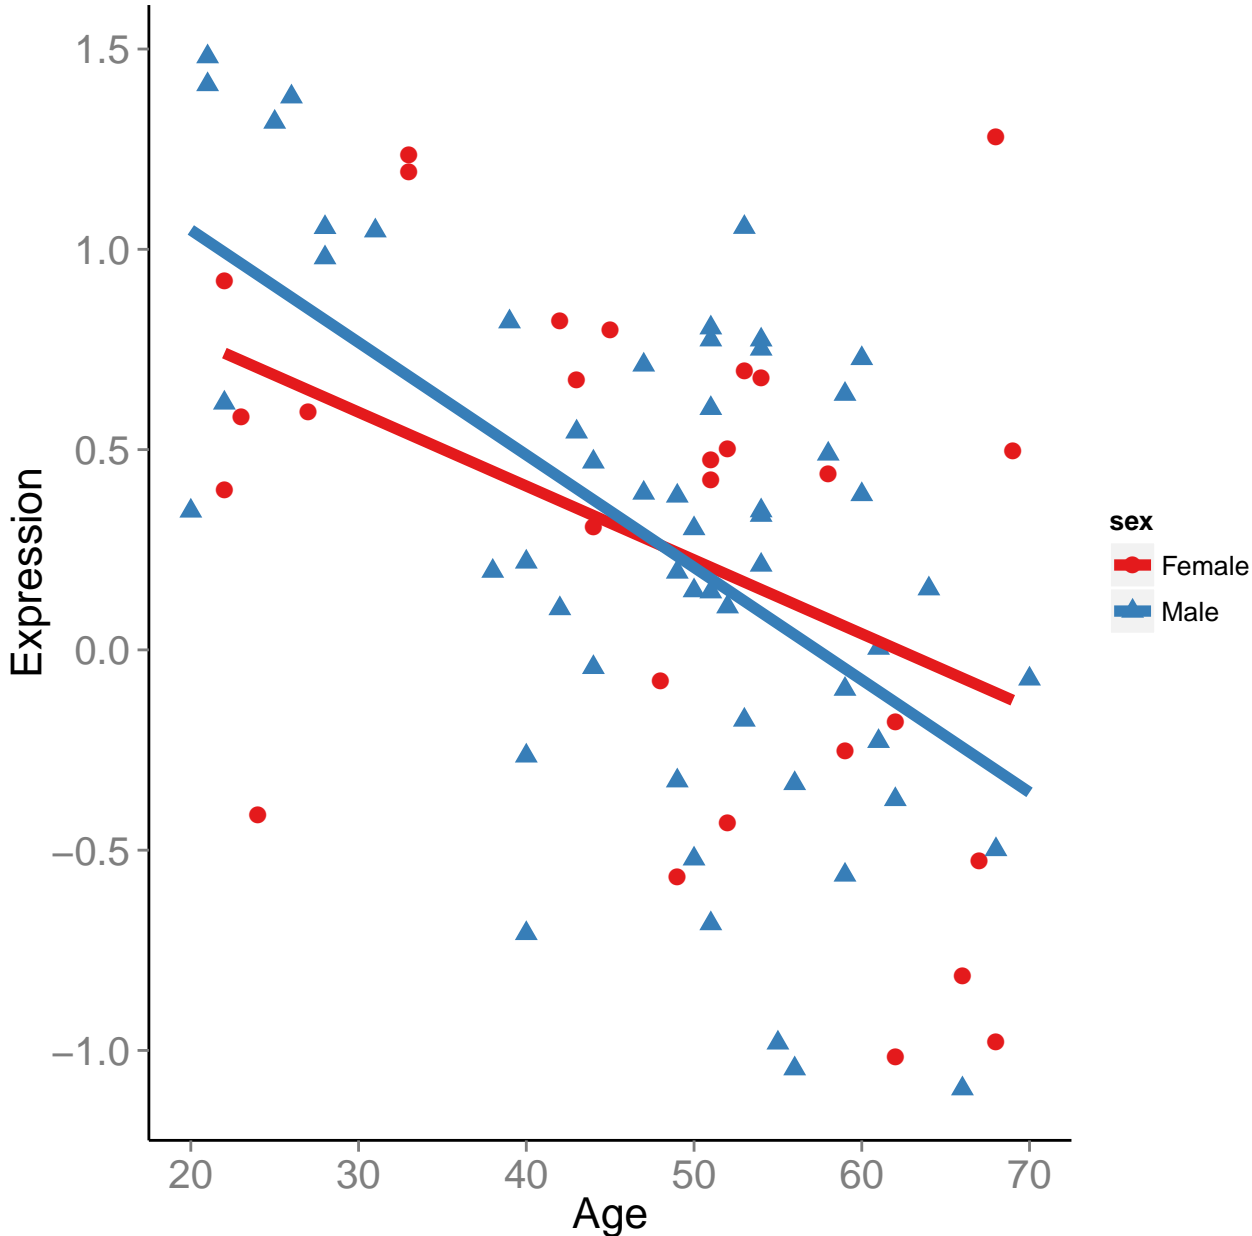

Heart: ST20 Pearson-R=0.51 Pval=9.37E-07

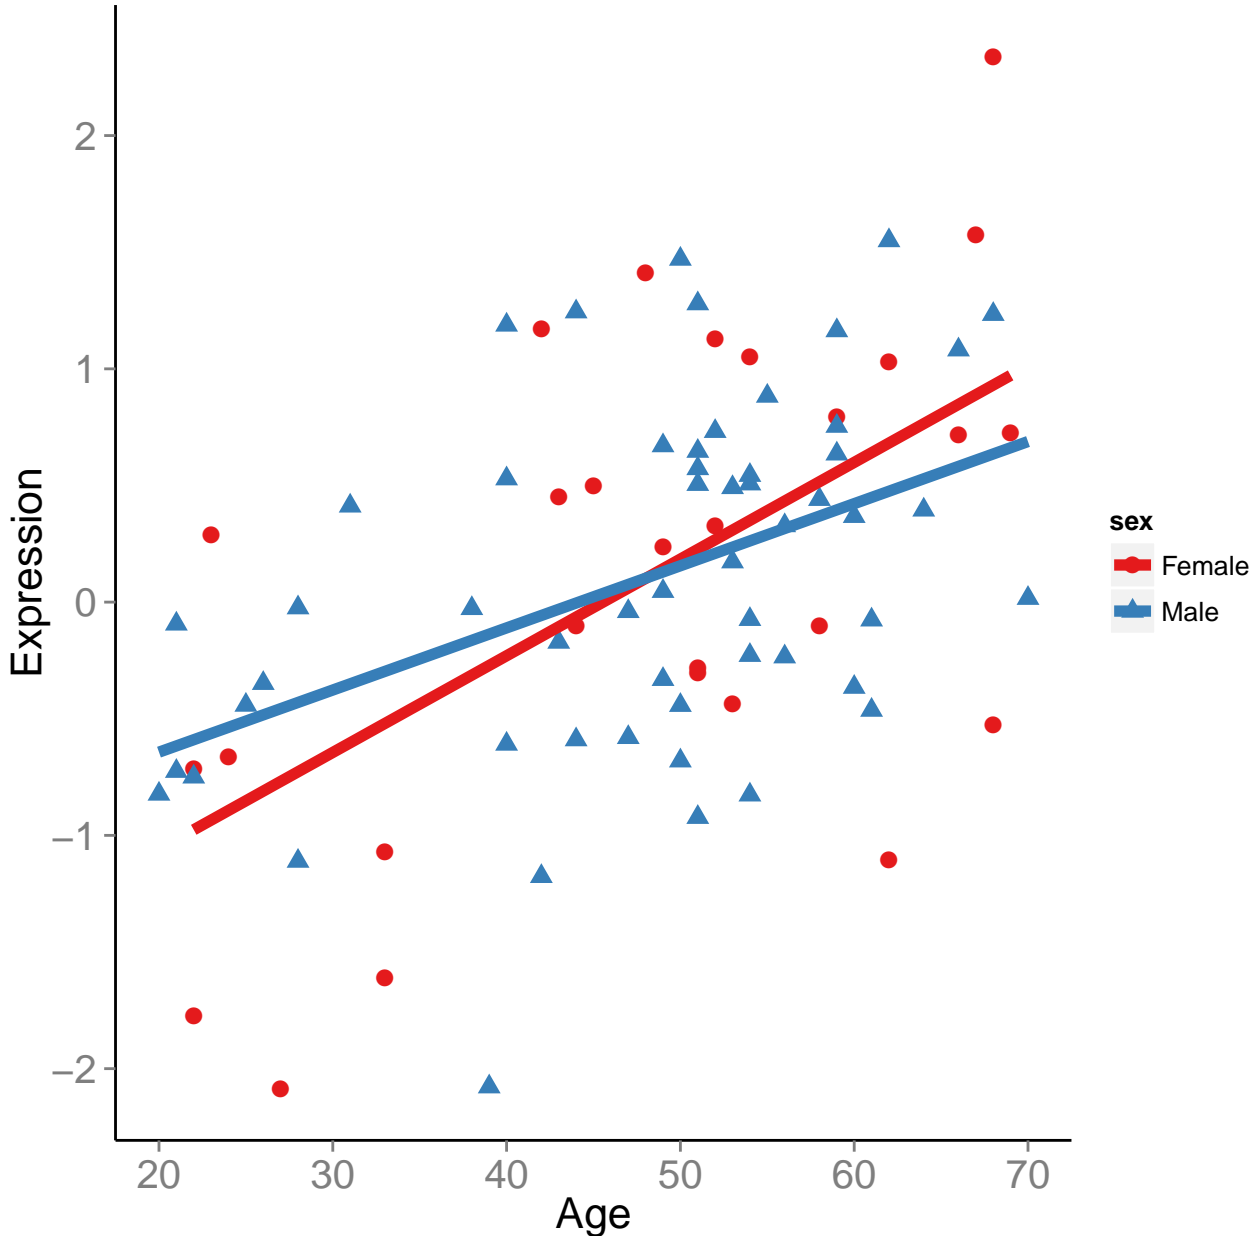

Heart: BCAS2 Pearson-R=-0.50 Pval=1.12E-06

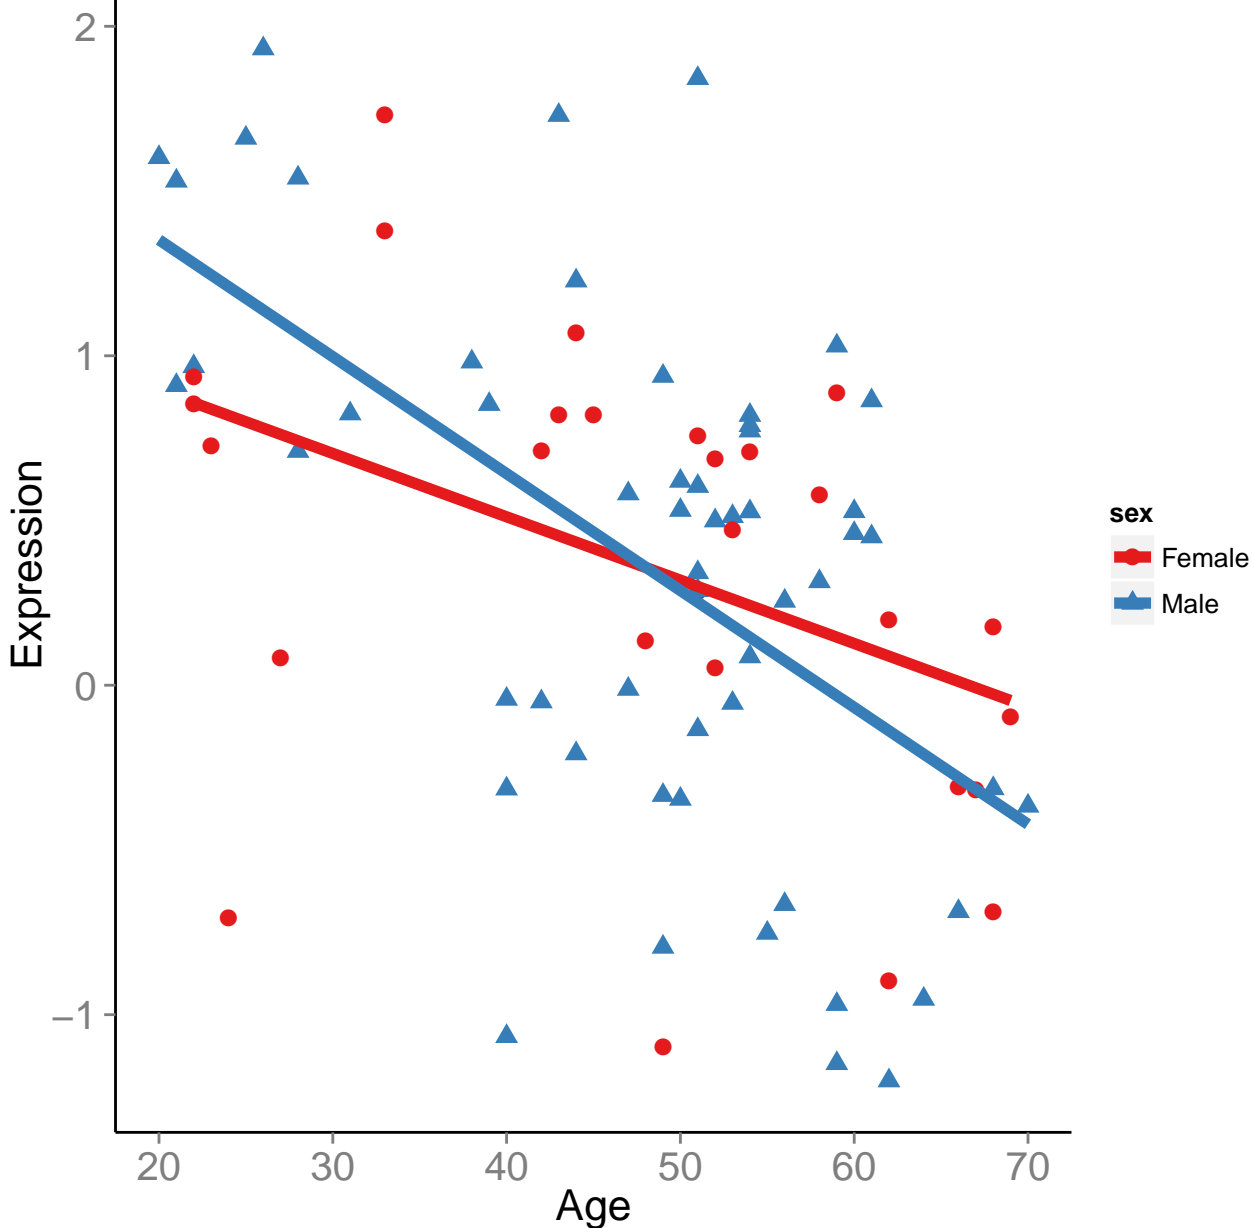

Heart: ING1 Pearson-R=0.51 Pval=1.05E-06

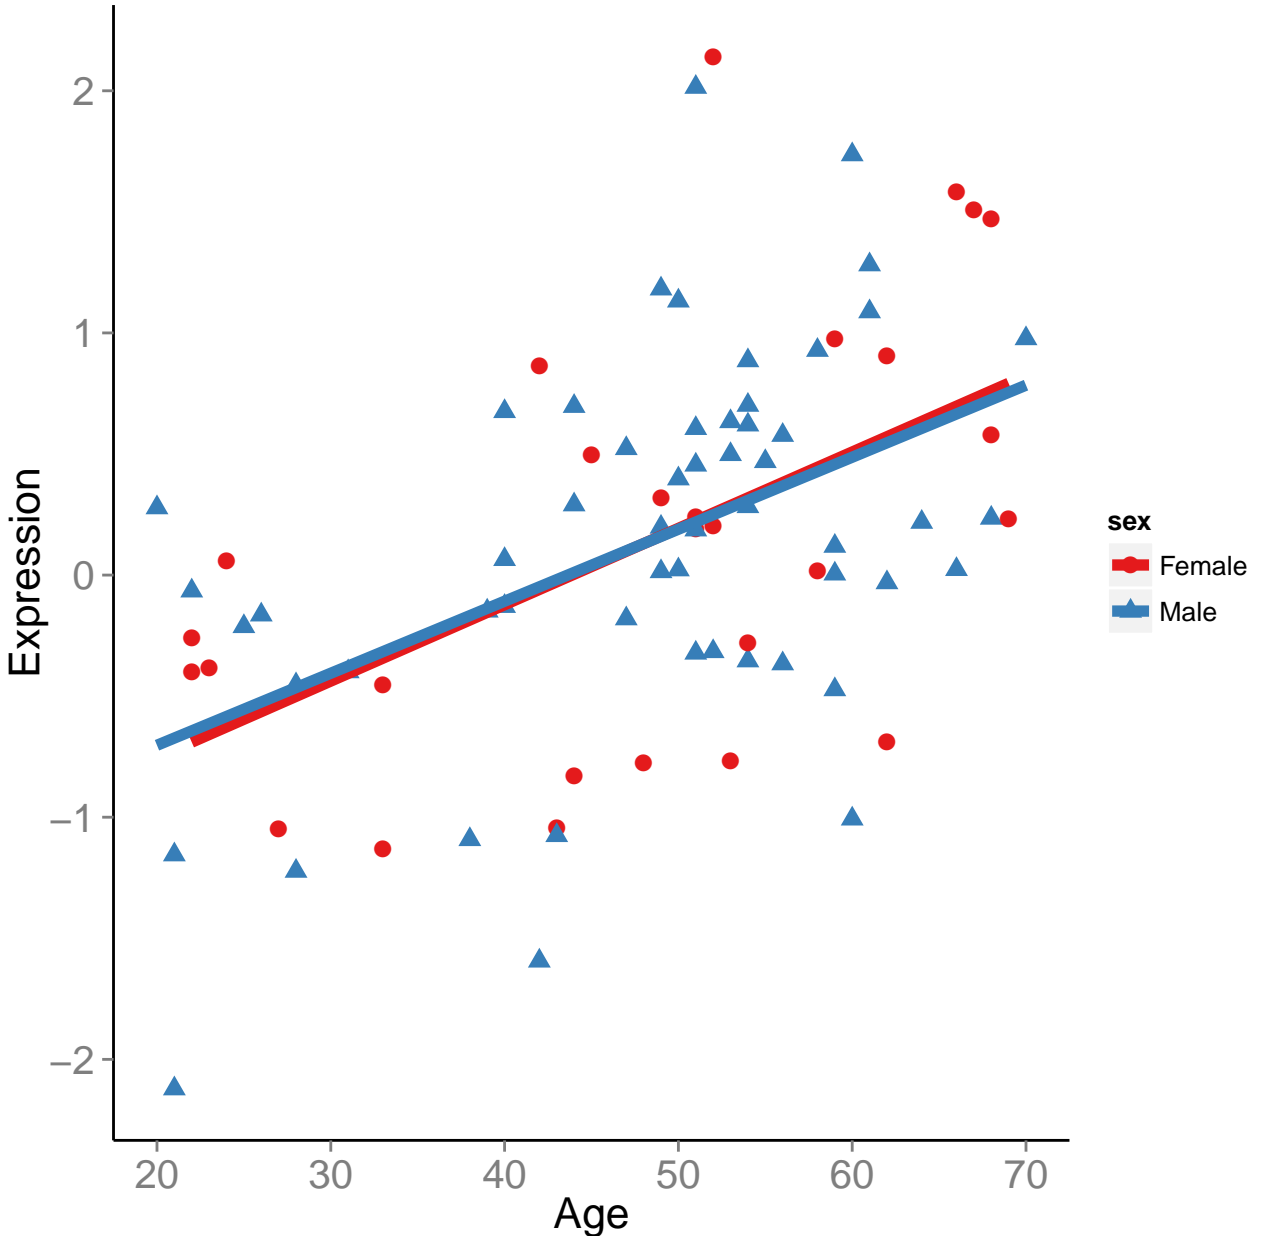

Heart: MRPL15 Pearson-R=-0.50 Pval=1.17E-06

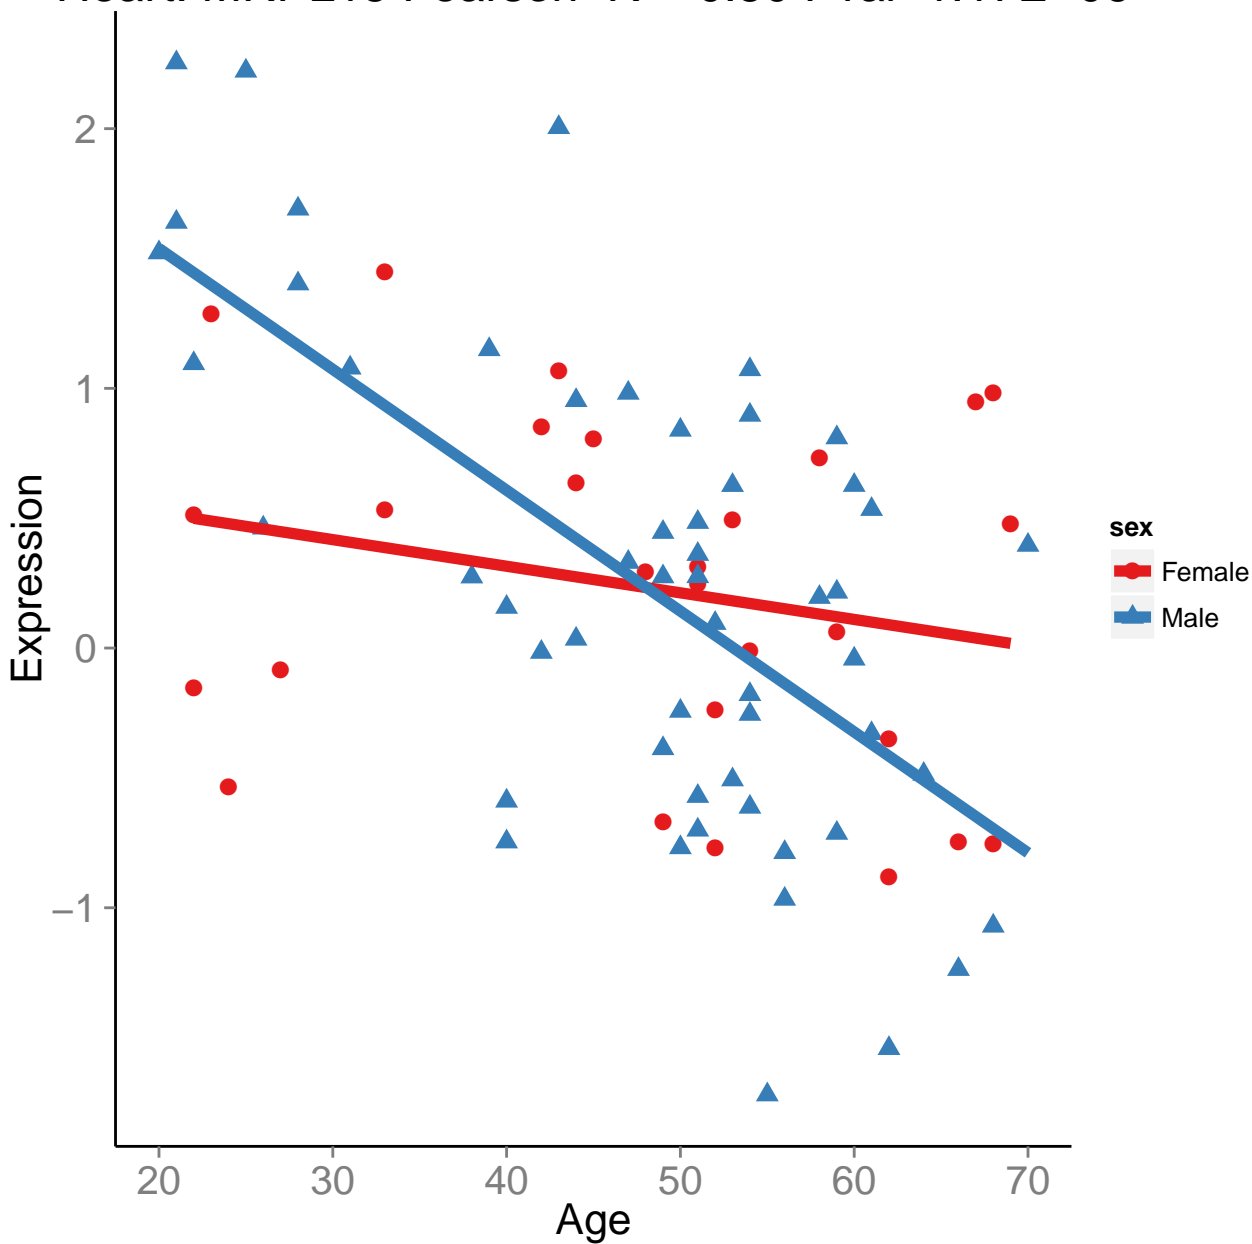

Heart: TAL1 Pearson-R=0.50 Pval=1.42E-06

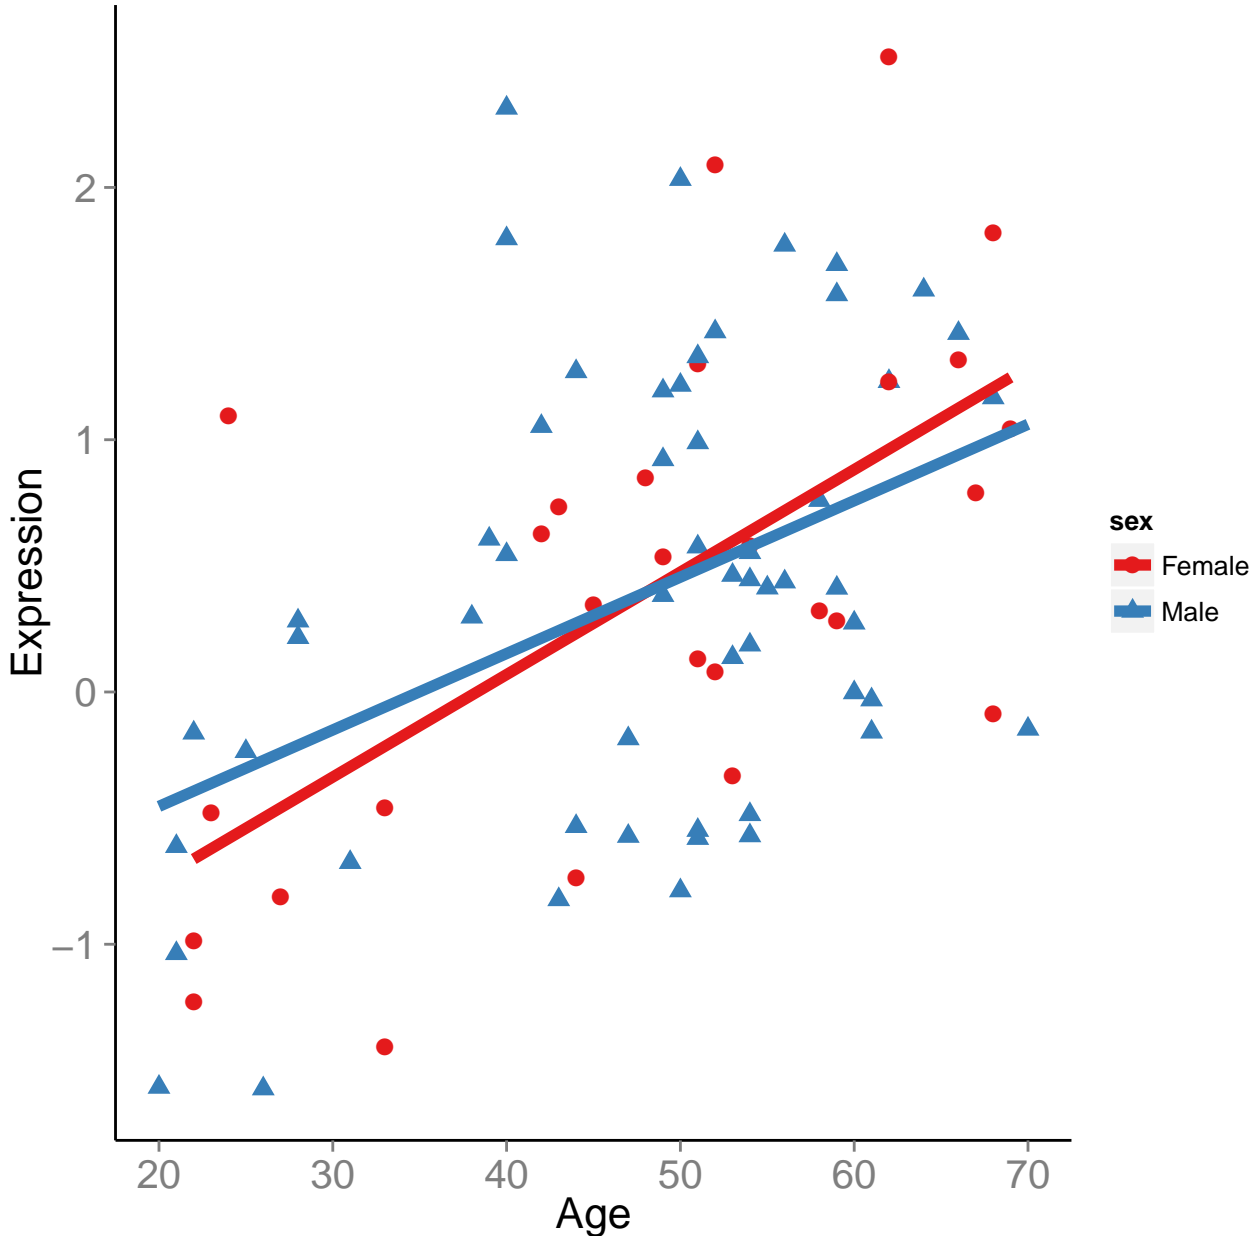

Heart: PARL Pearson-R=-0.50 Pval=1.50E-06

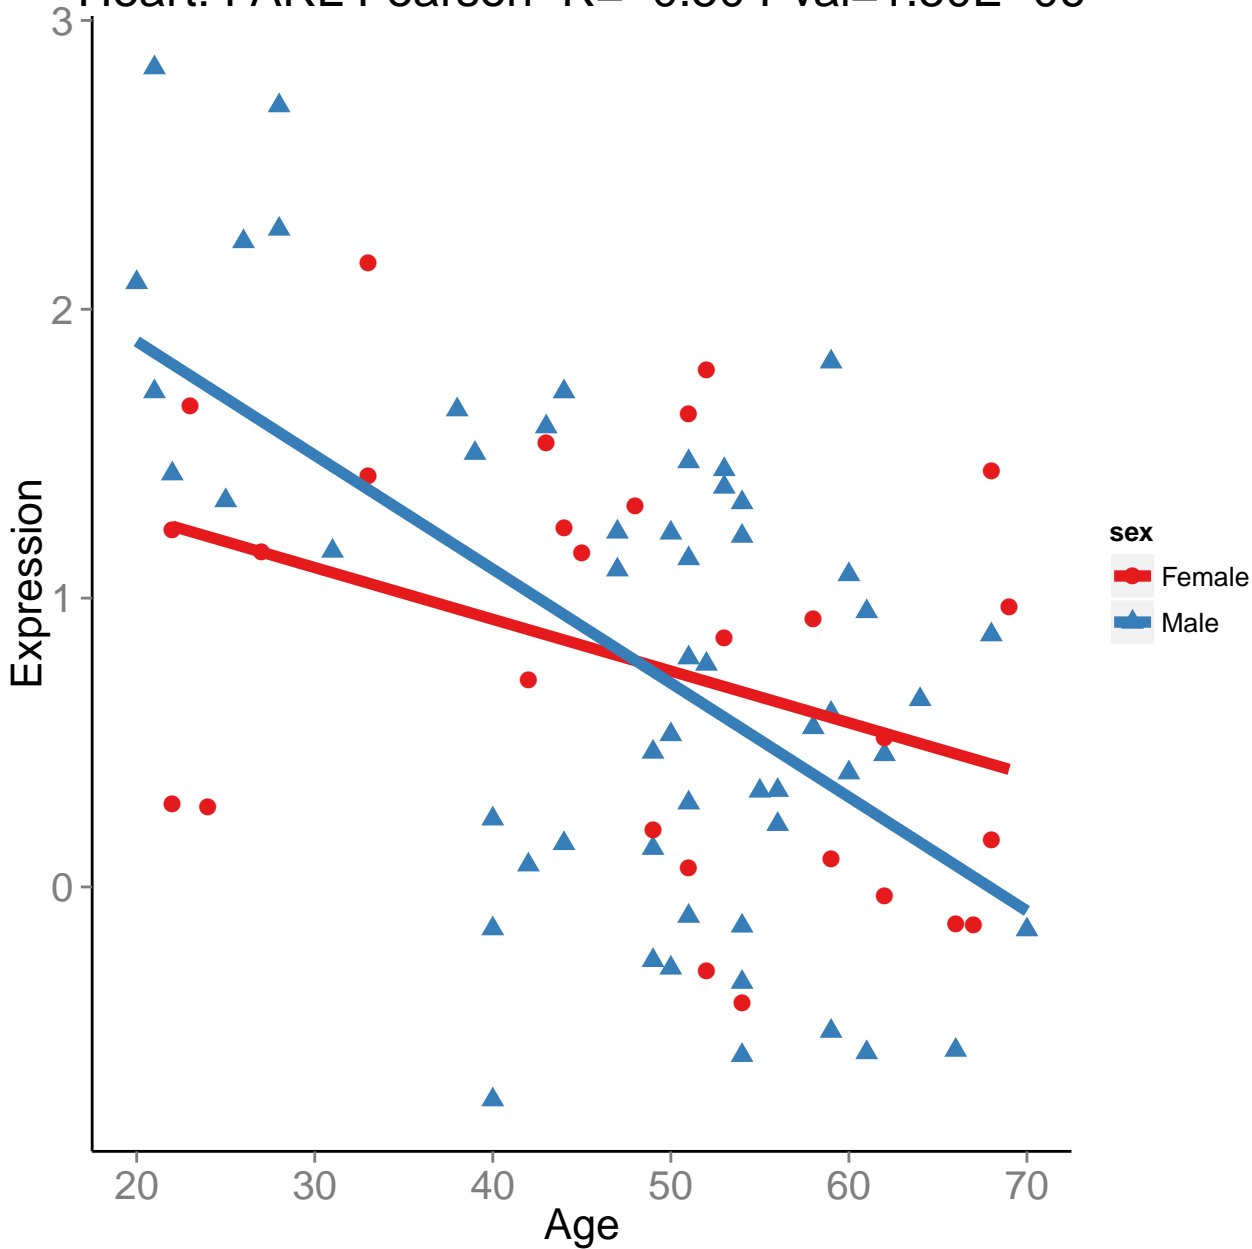

Heart: ZNF862 Pearson-R=0.50 Pval=1.46E-06

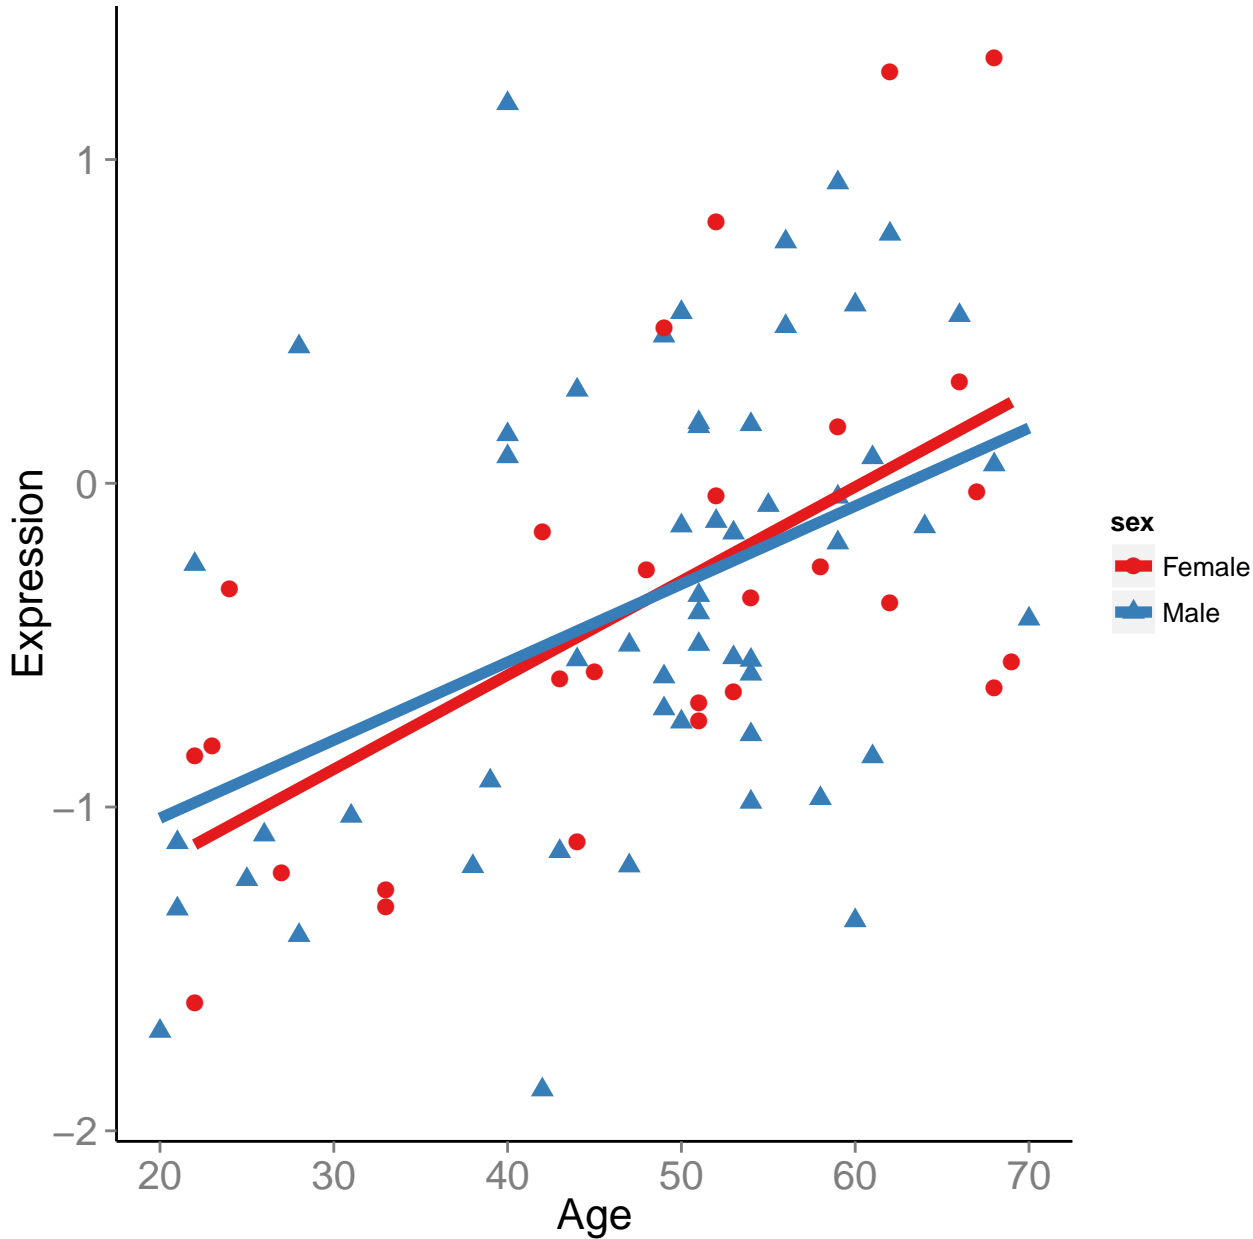



Heart: MARK2 Pearson-R=0.50 Pval=1.45E-06

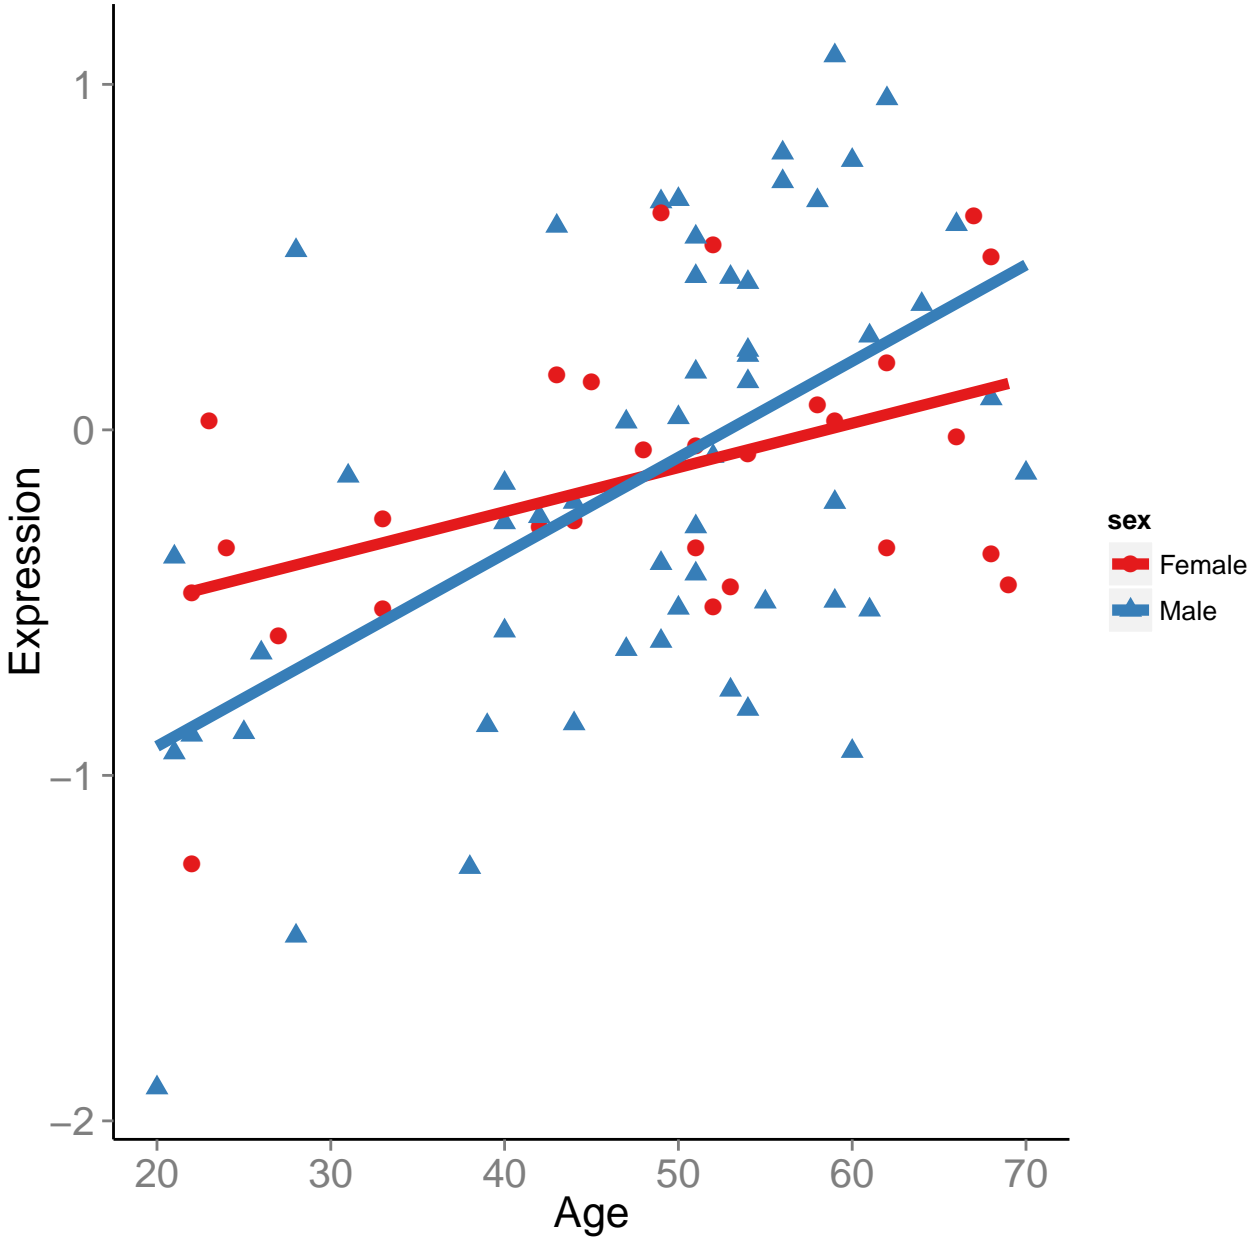

Heart: CYHR1 Pearson-R=0.50 Pval=1.49E-06

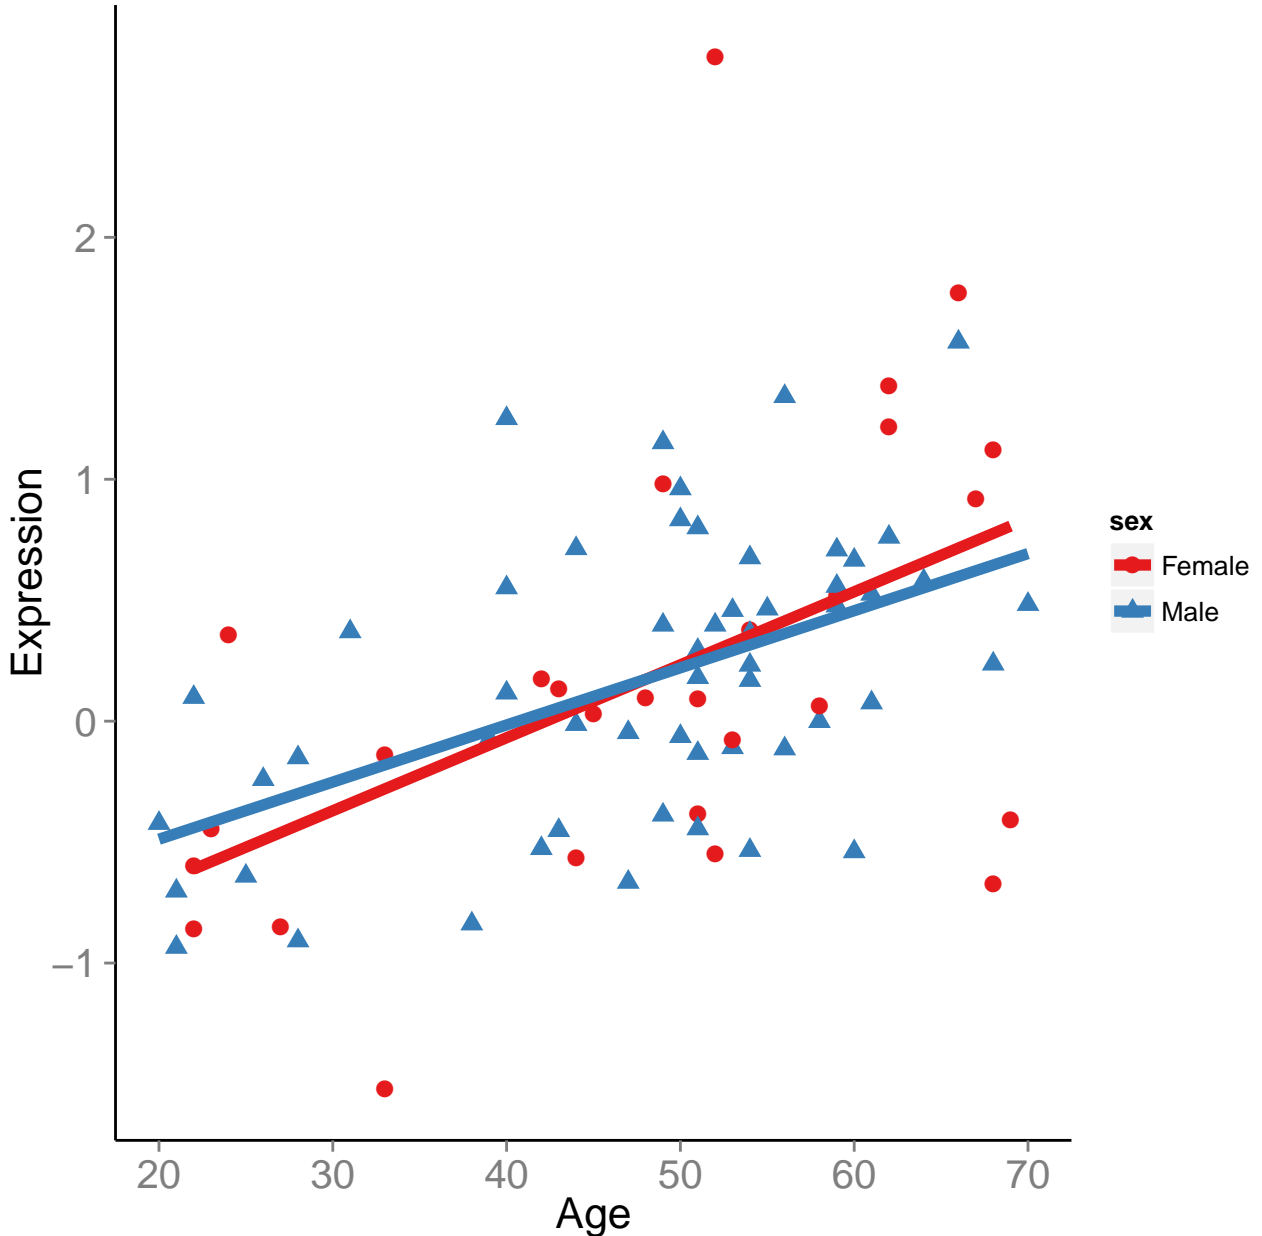

Heart: RRNAD1 Pearson-R=0.50 Pval=1.60E-06

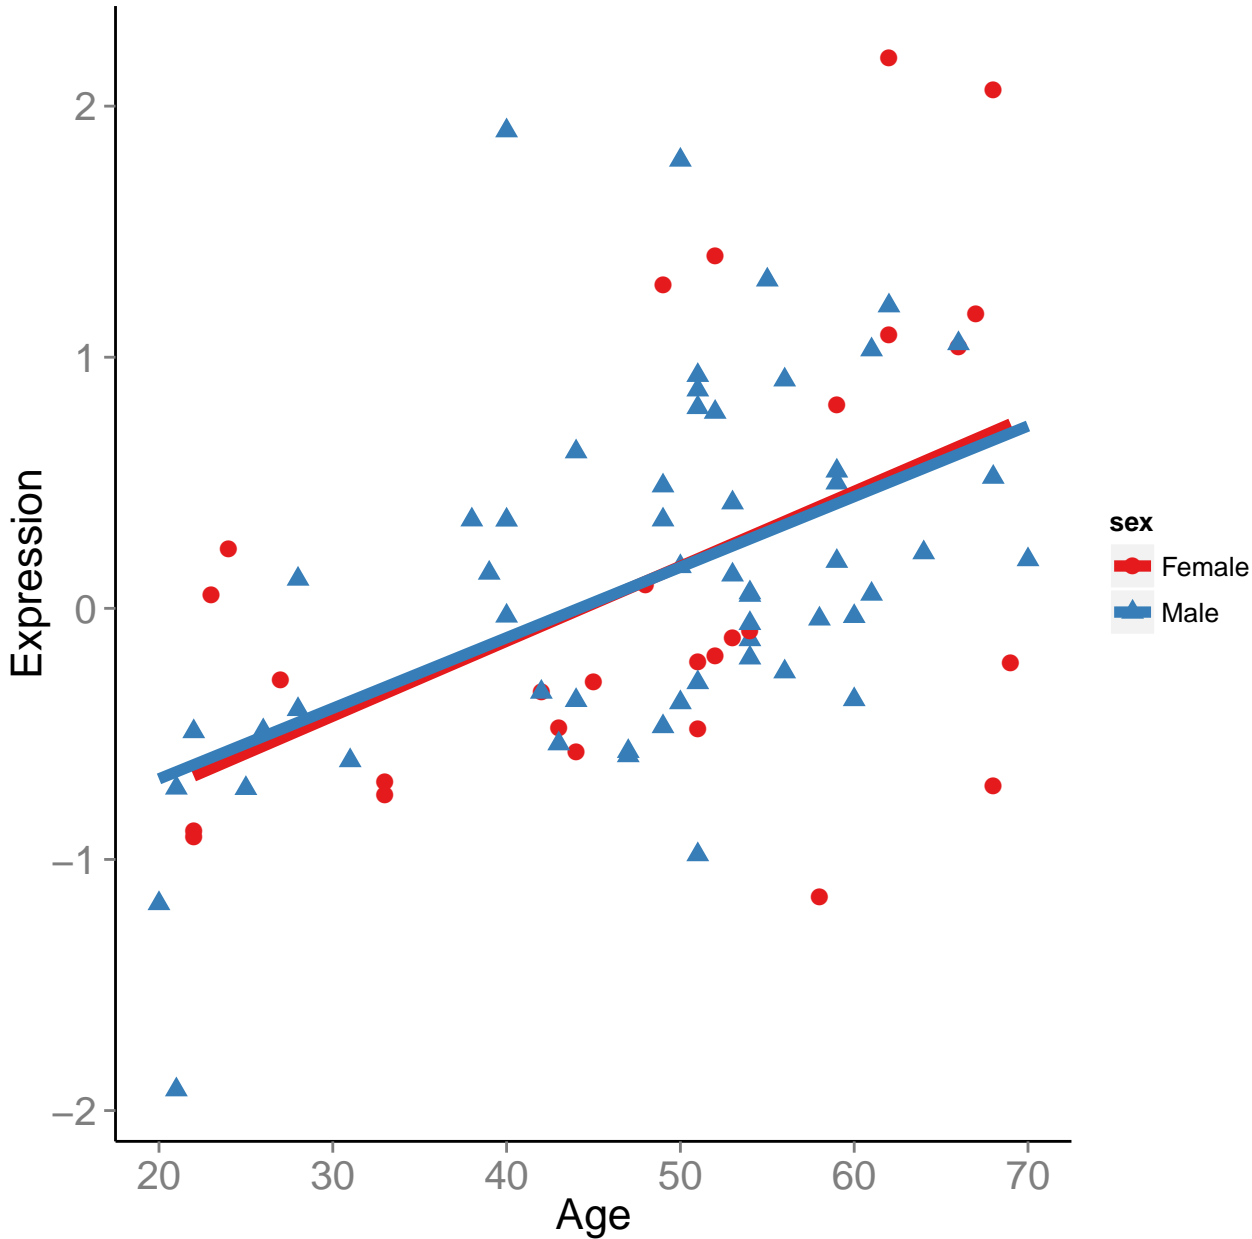

Heart: PDIA2 Pearson-R=0.50 Pval=1.74E-06

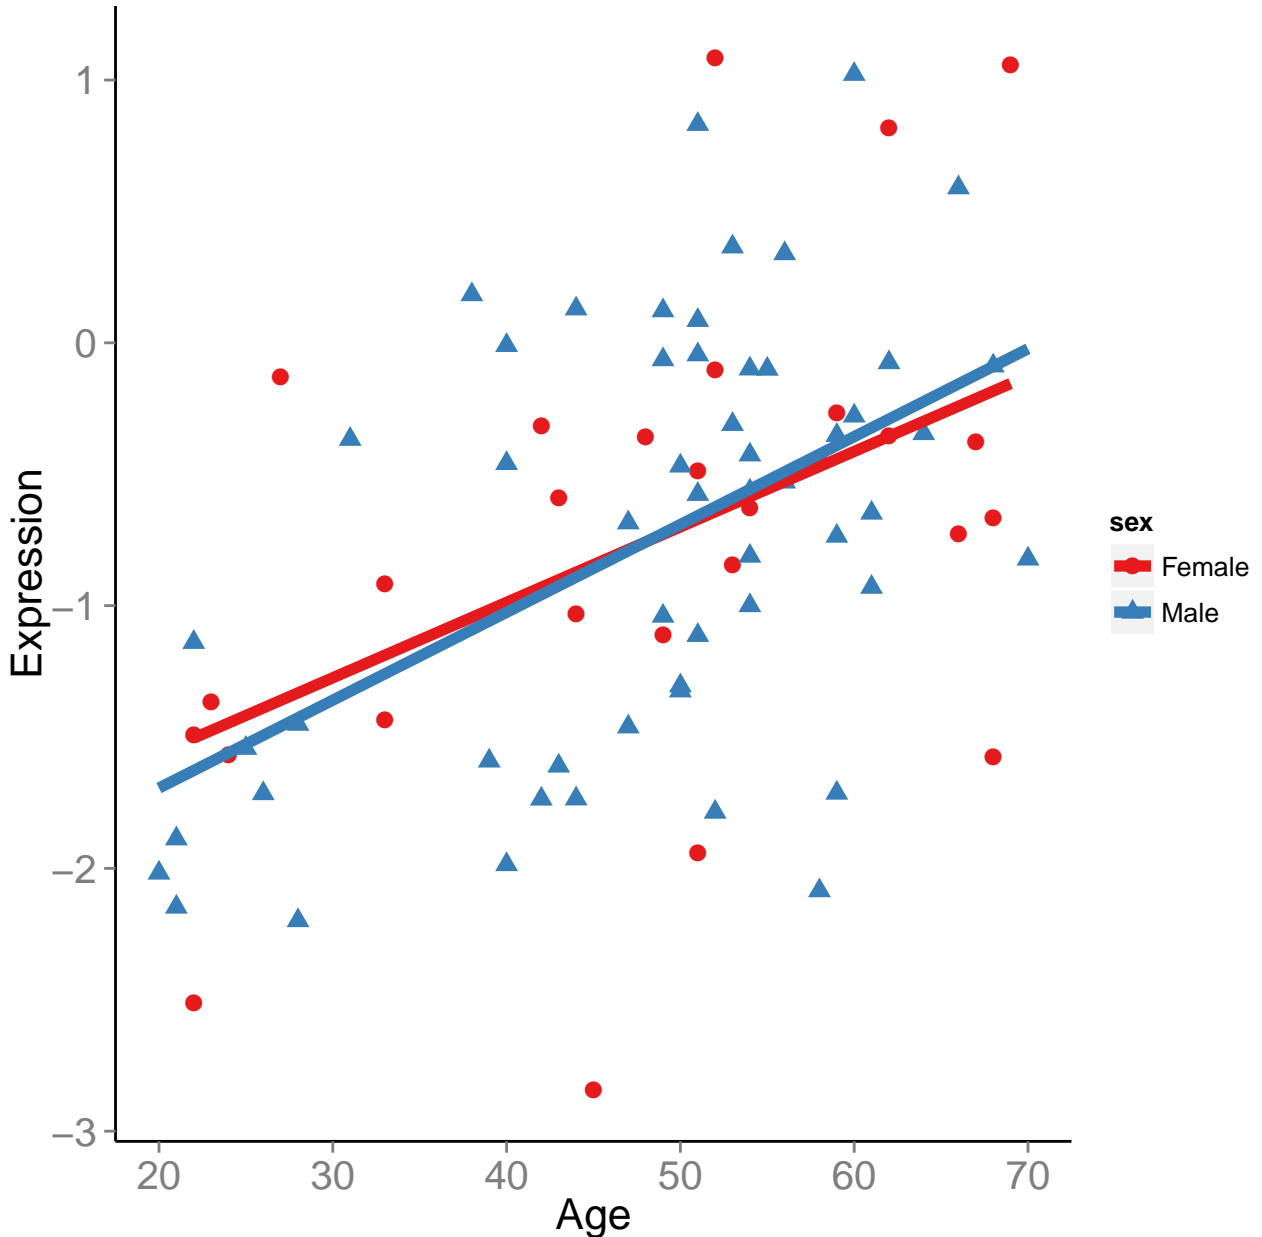

Heart: RNF44 Pearson-R=0.50 Pval=1.75E-06

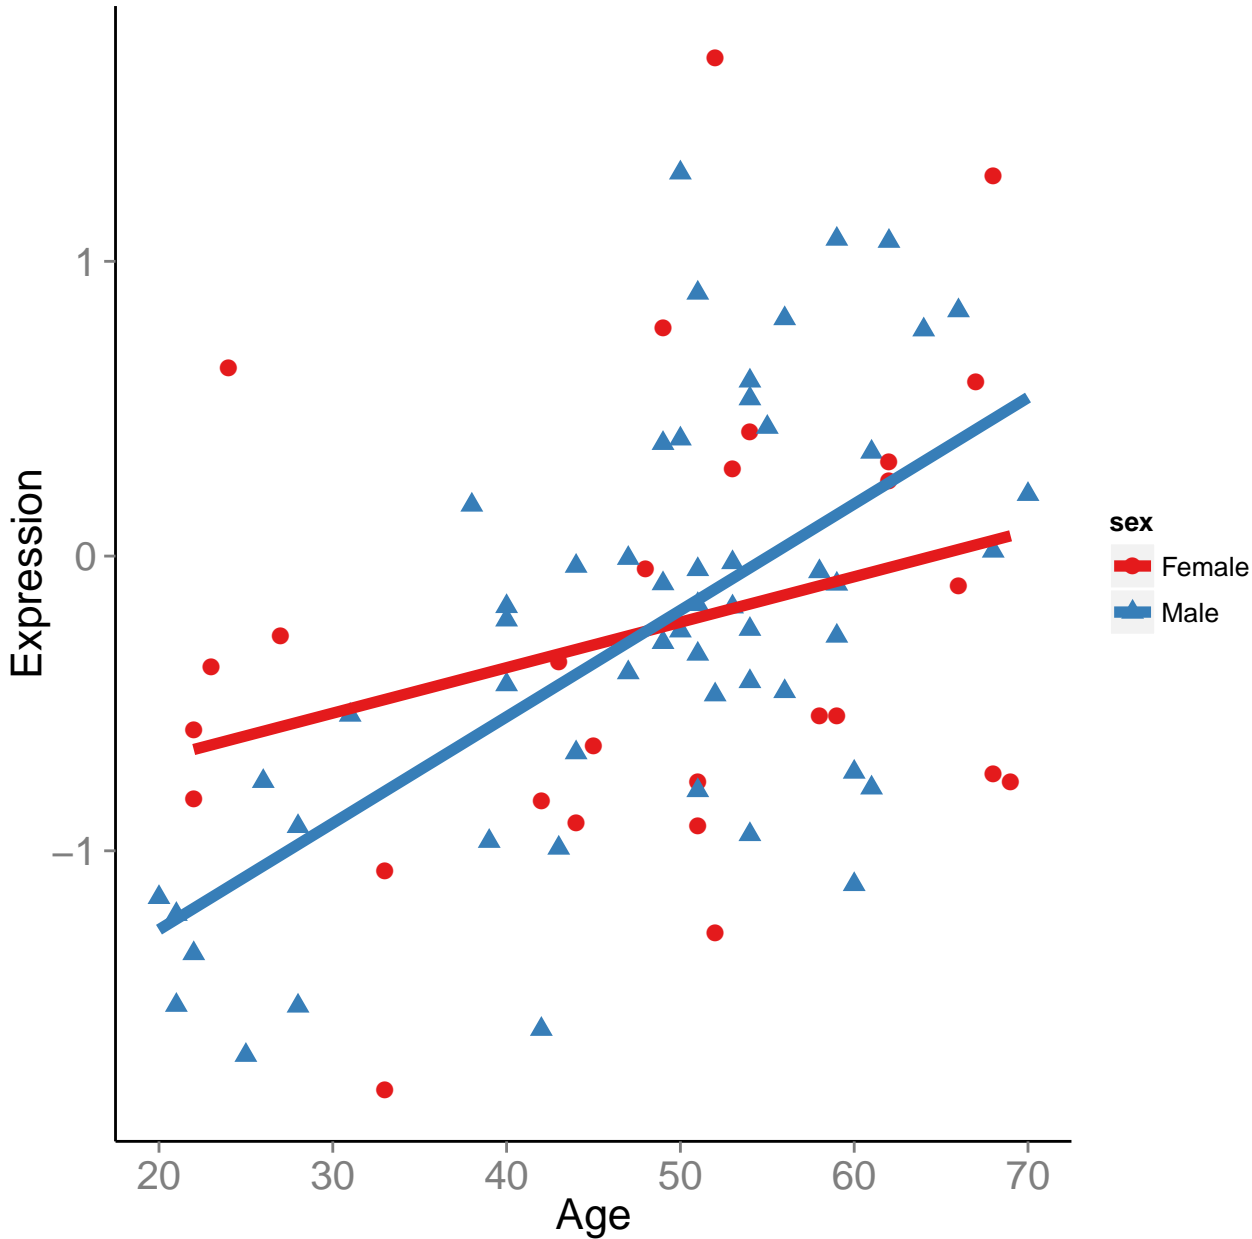

Heart: PKD1P6 Pearson-R=0.49 Pval=1.97E-06

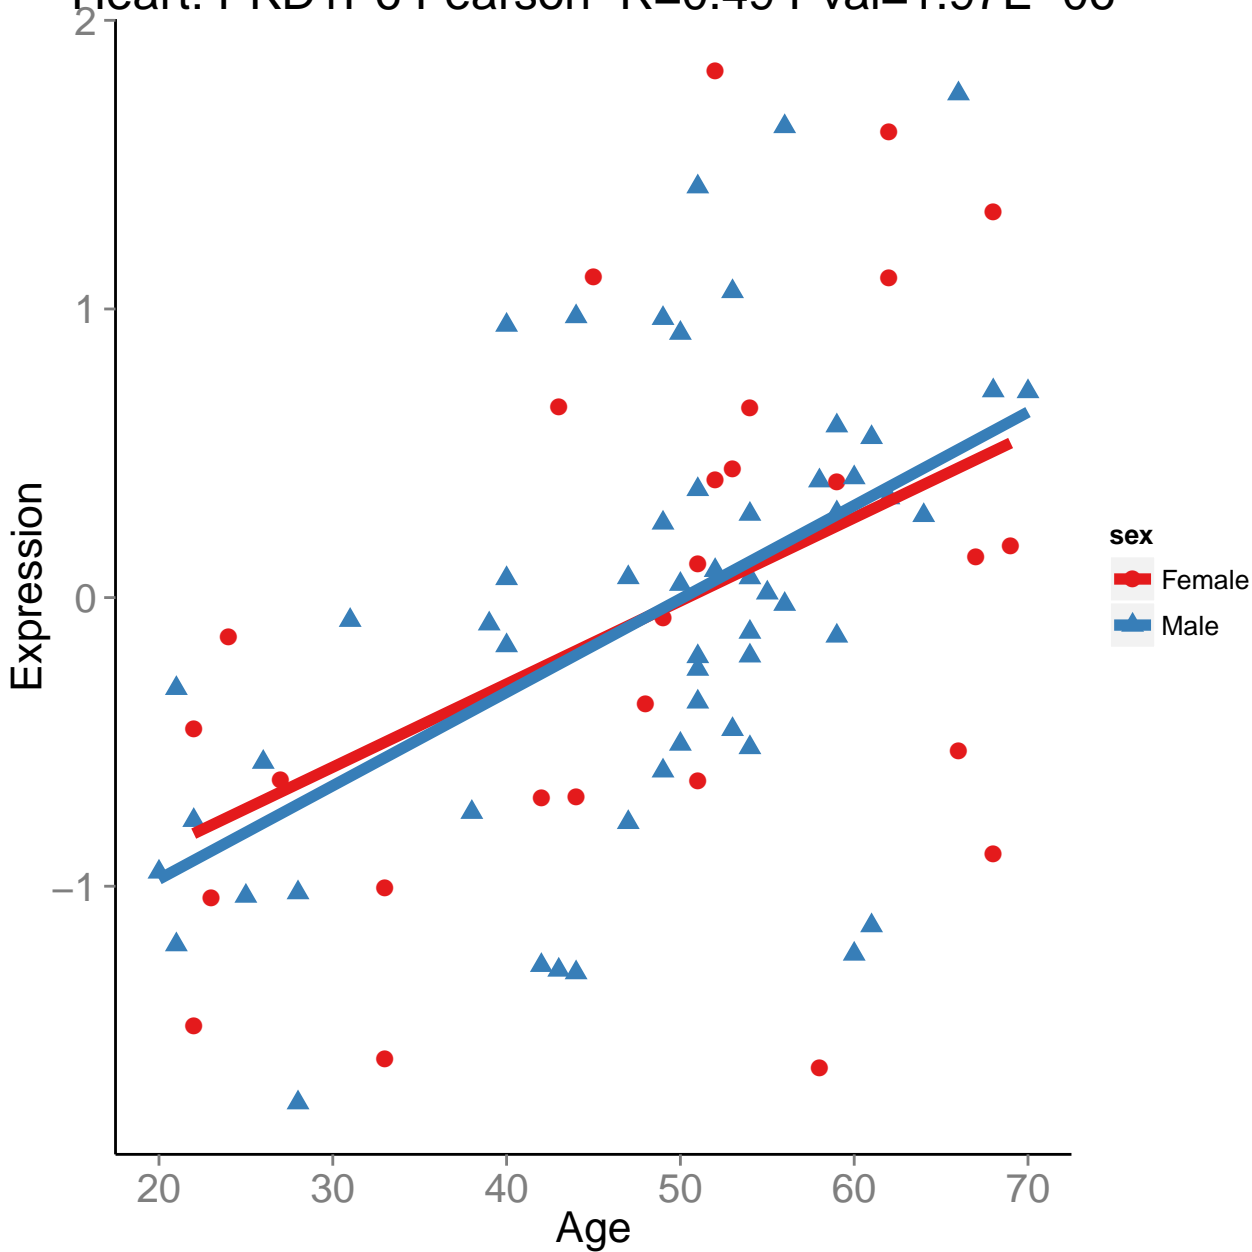

Heart: TJAP1 Pearson-R=0.49 Pval=2.15E-06

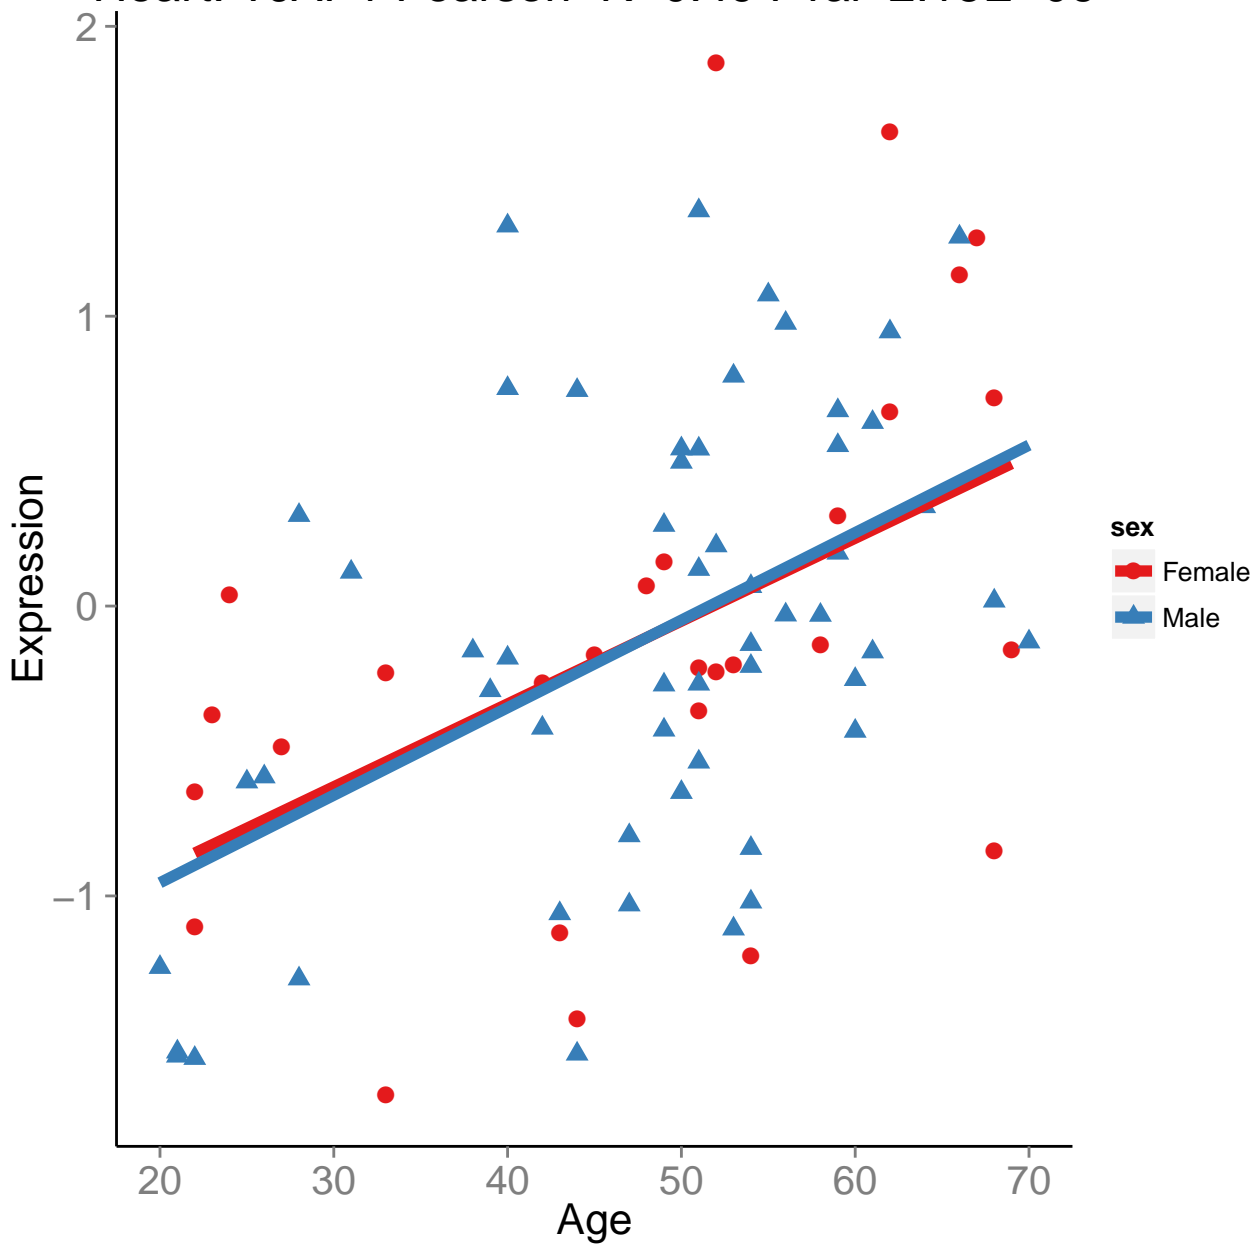

Heart: SULF2 Pearson-R=0.49 Pval=2.22E-06

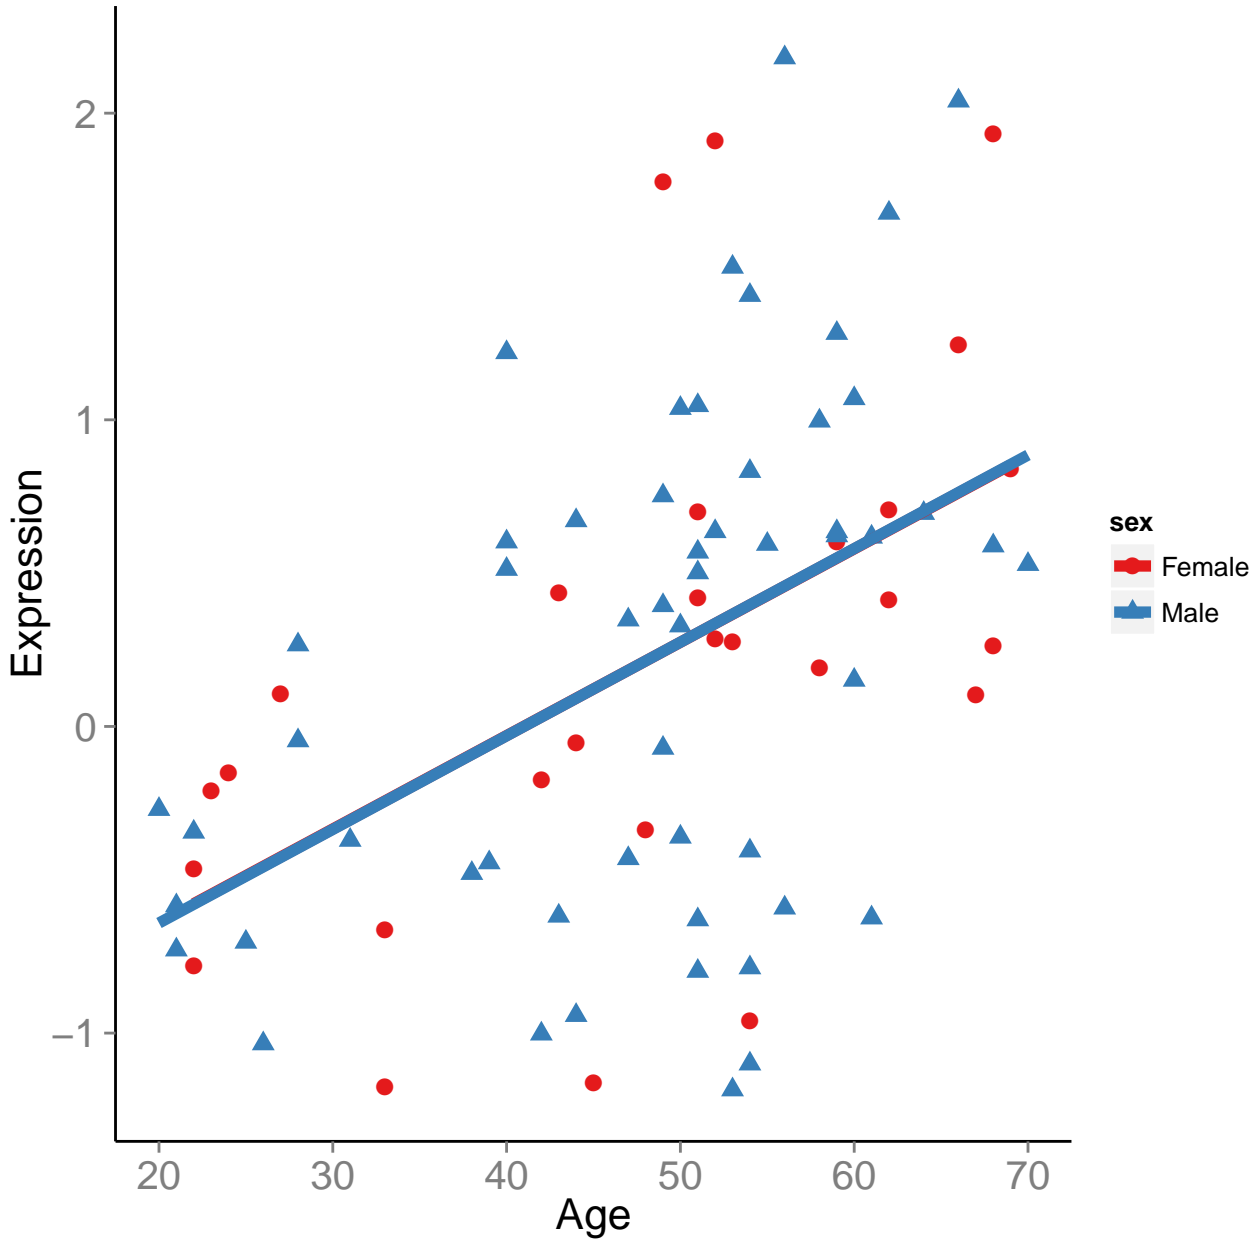



Heart: FOXP4 Pearson-R=0.49 Pval=2.47E-06

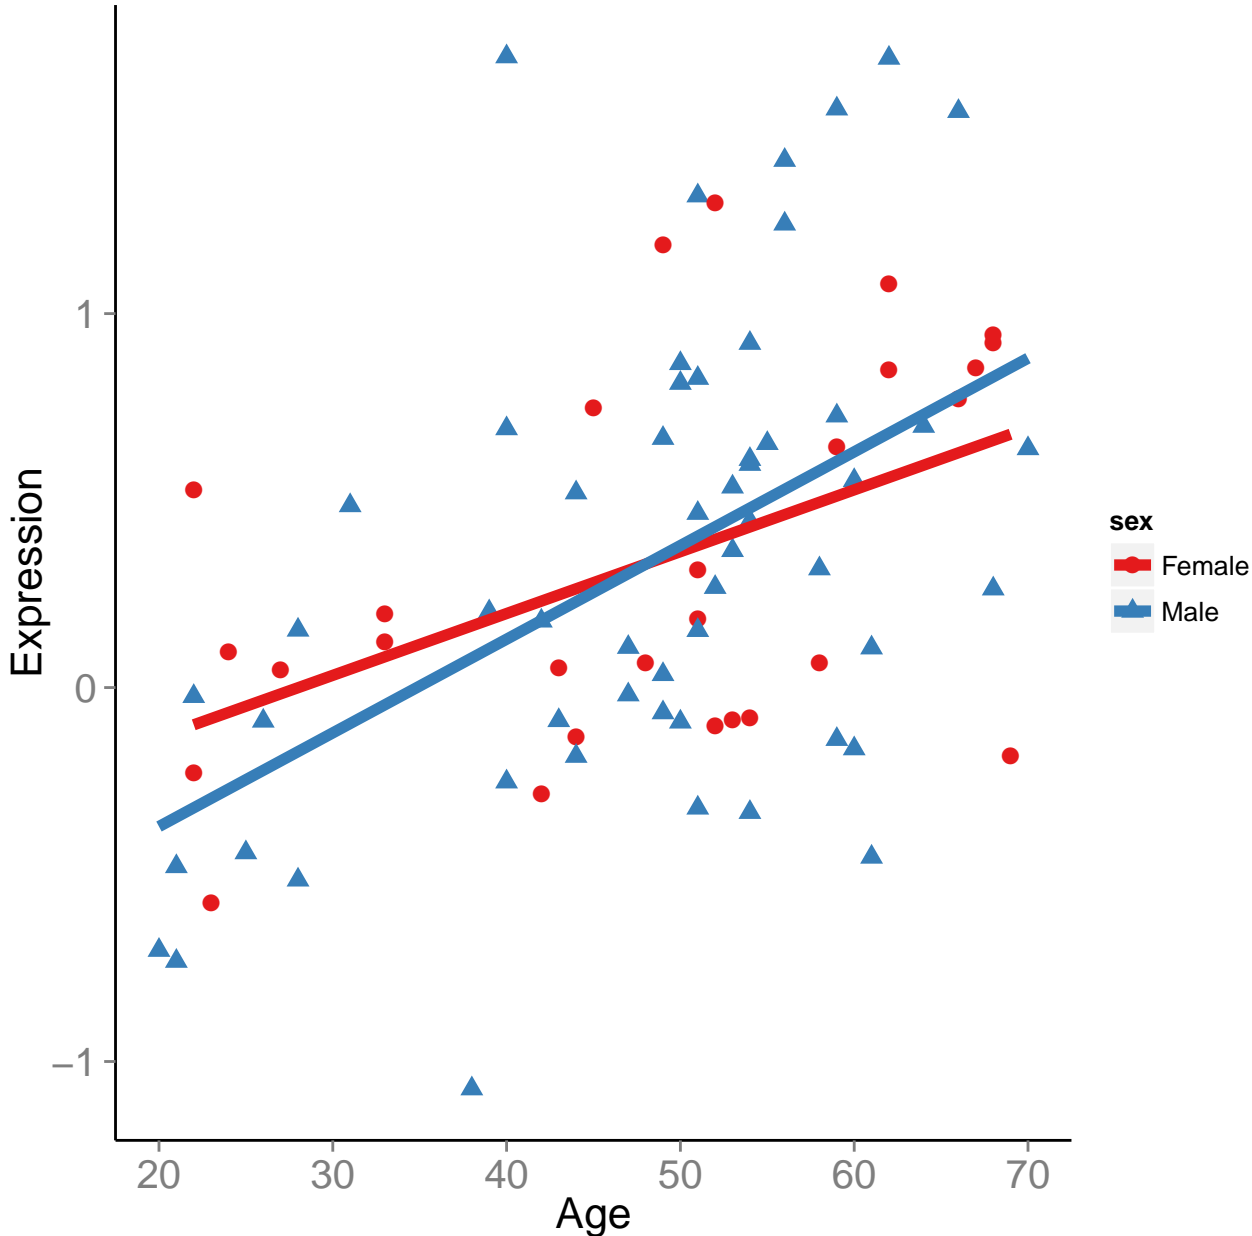

Heart: RBBP9 Pearson-R=-0.49 Pval=2.43E-06

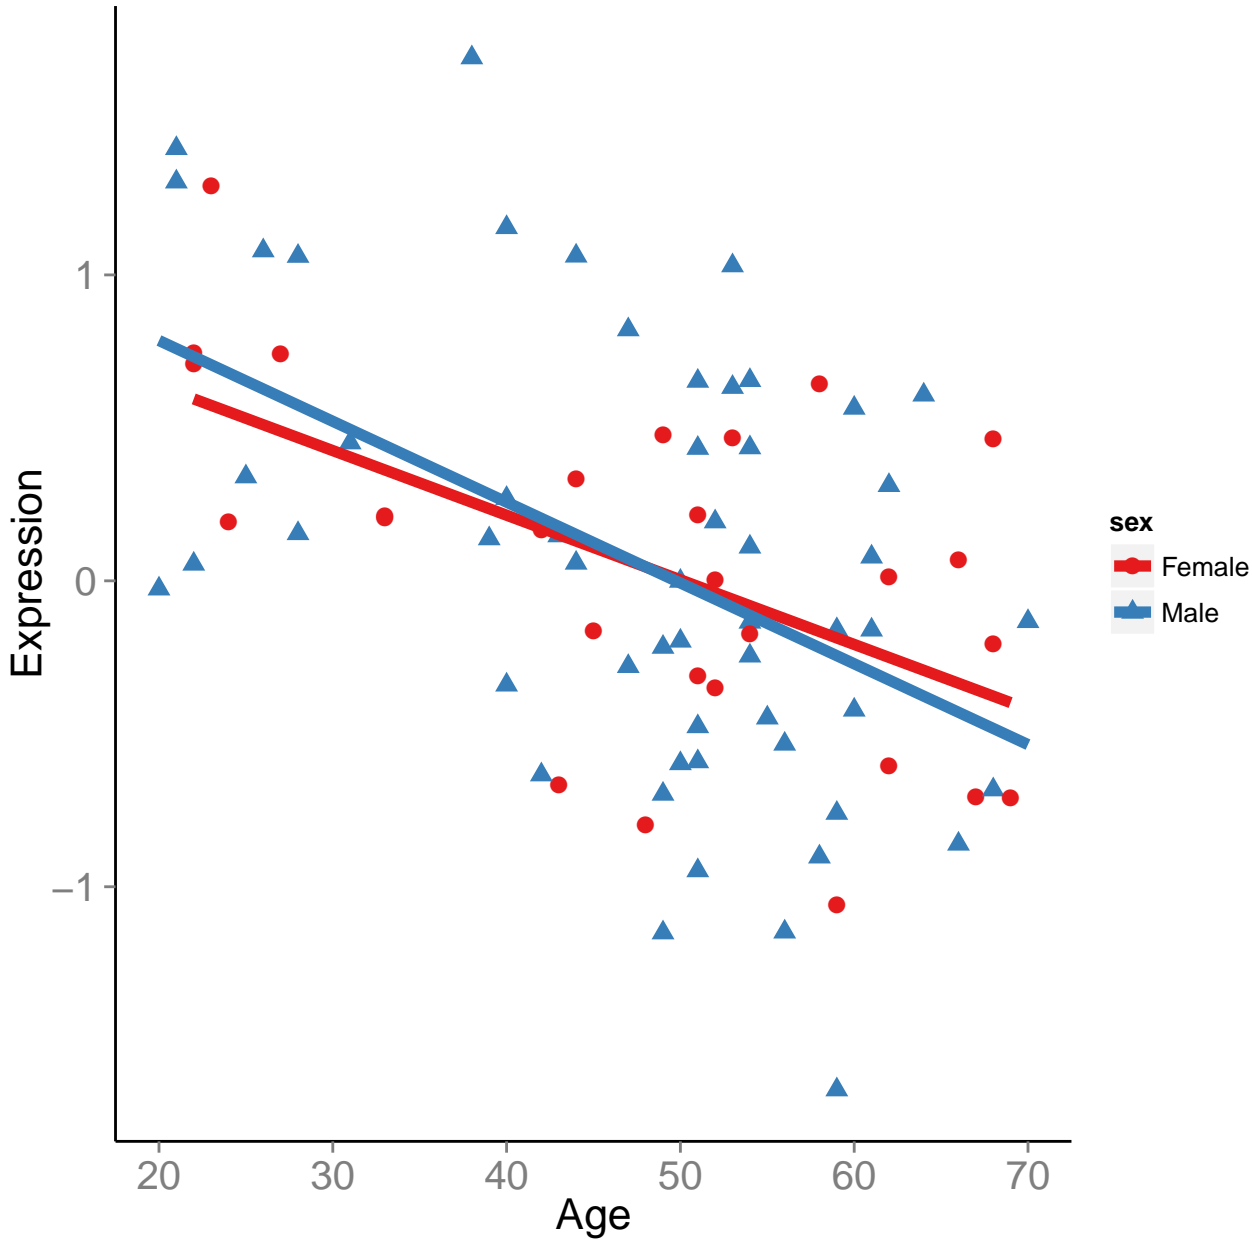

Heart: OXA1L Pearson-R=-0.49 Pval=2.63E-06

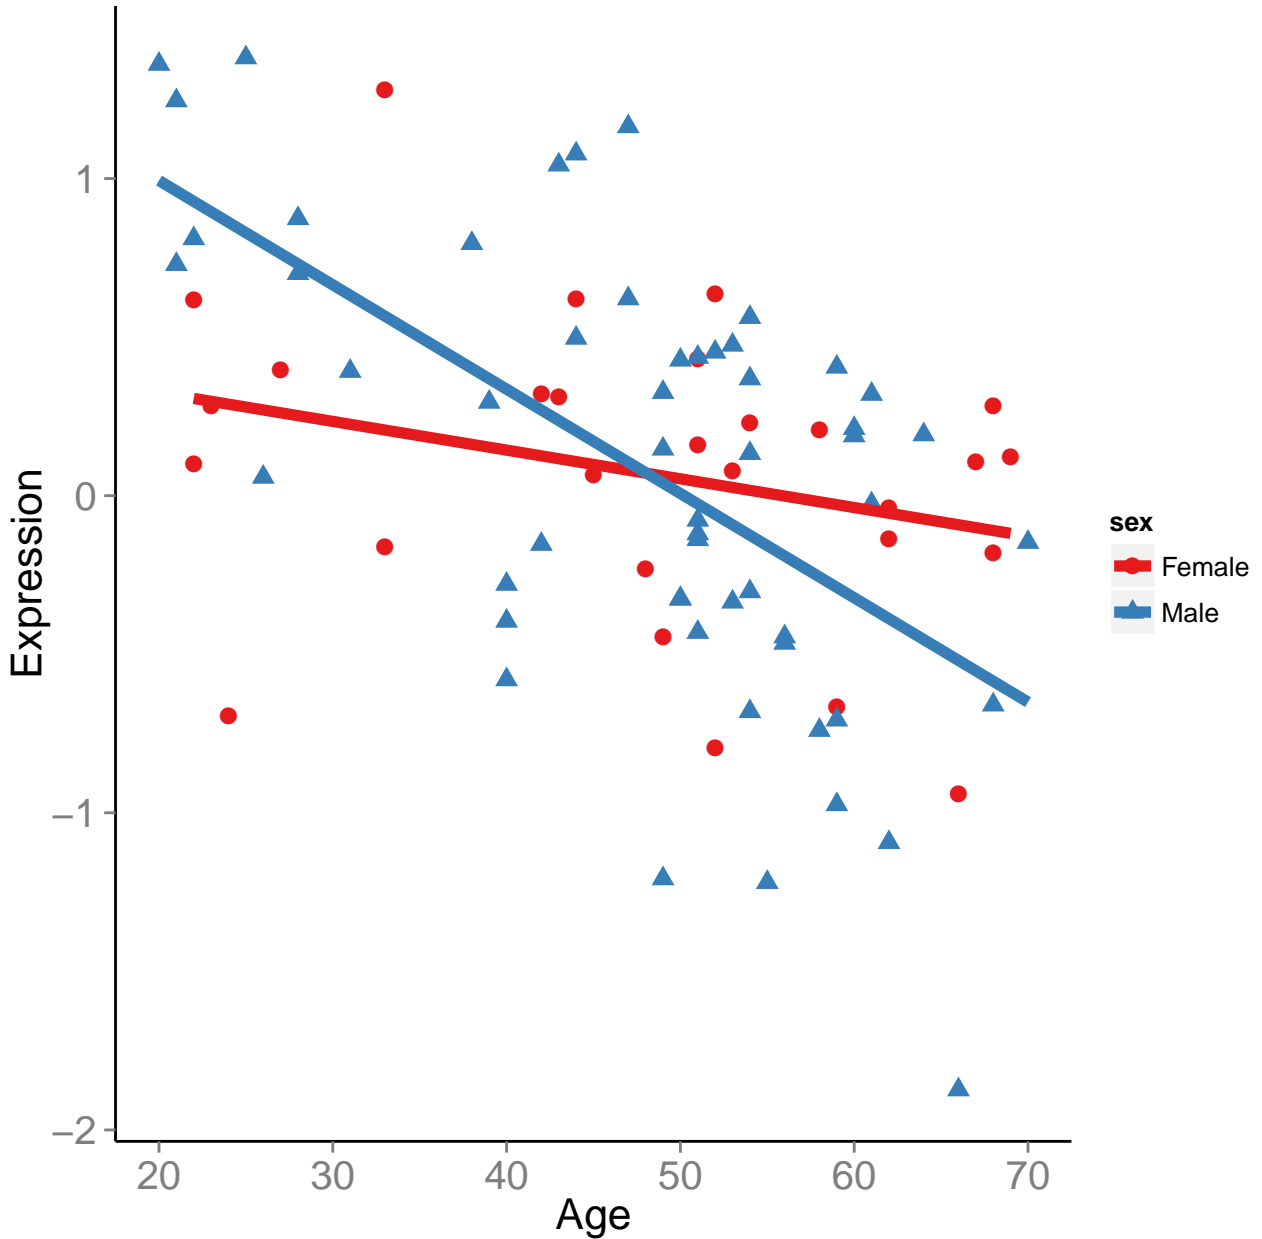

Heart: ELMOD3 Pearson-R=0.49 Pval=2.55E-06

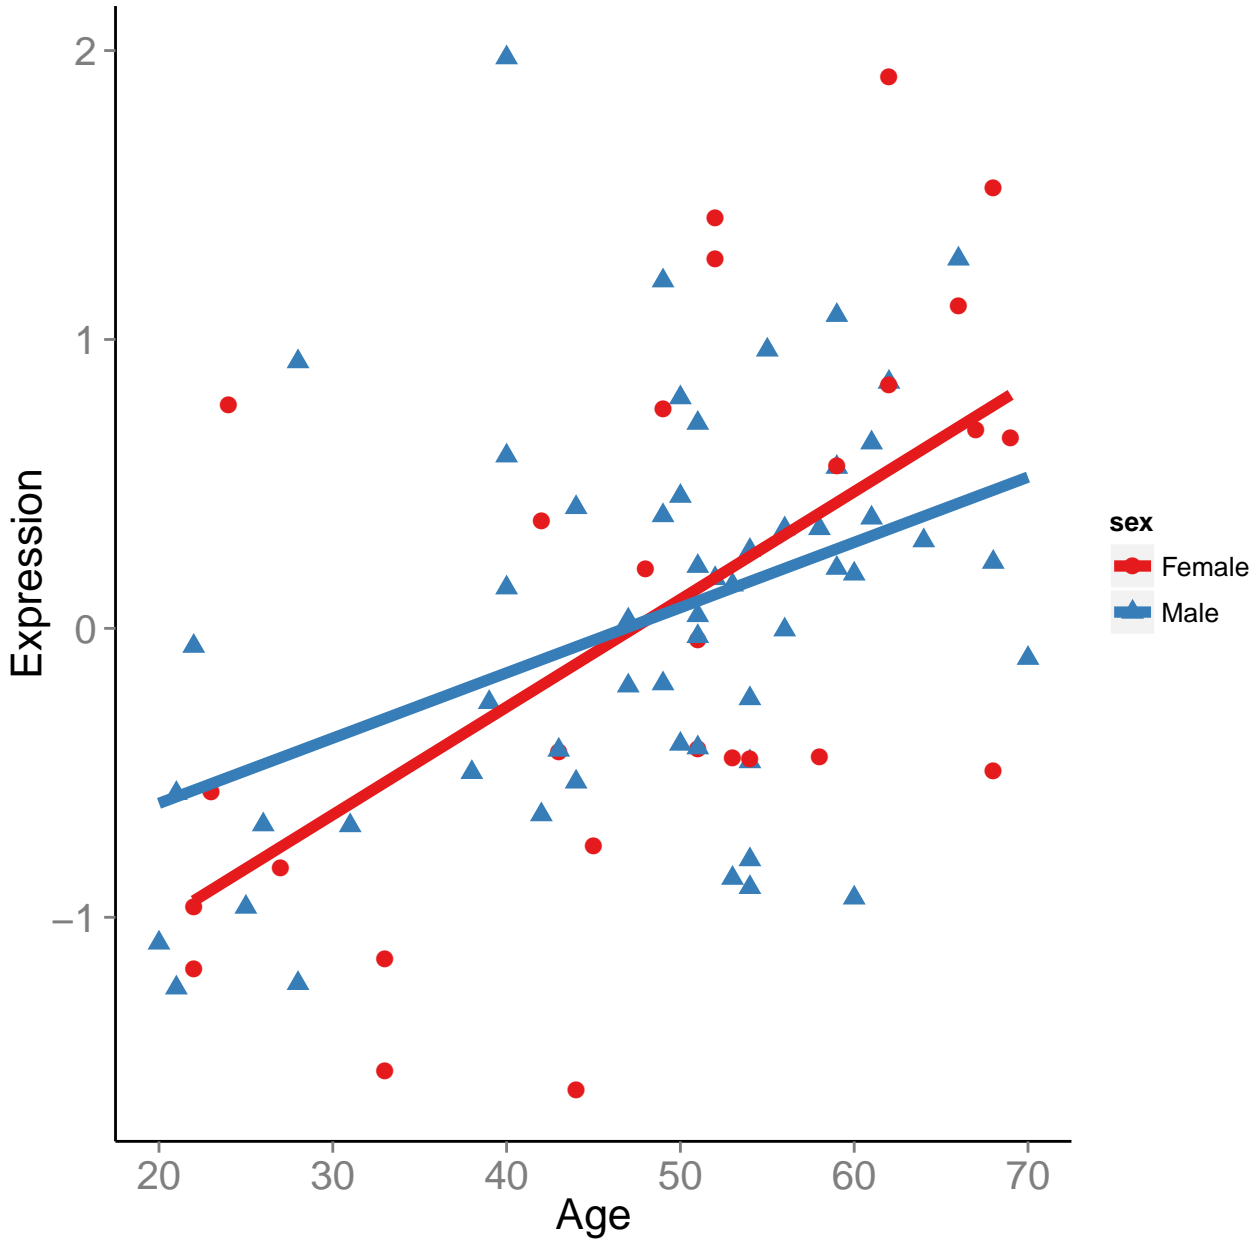

Heart: FAM100B Pearson-R=0.49 Pval=2.62E-06

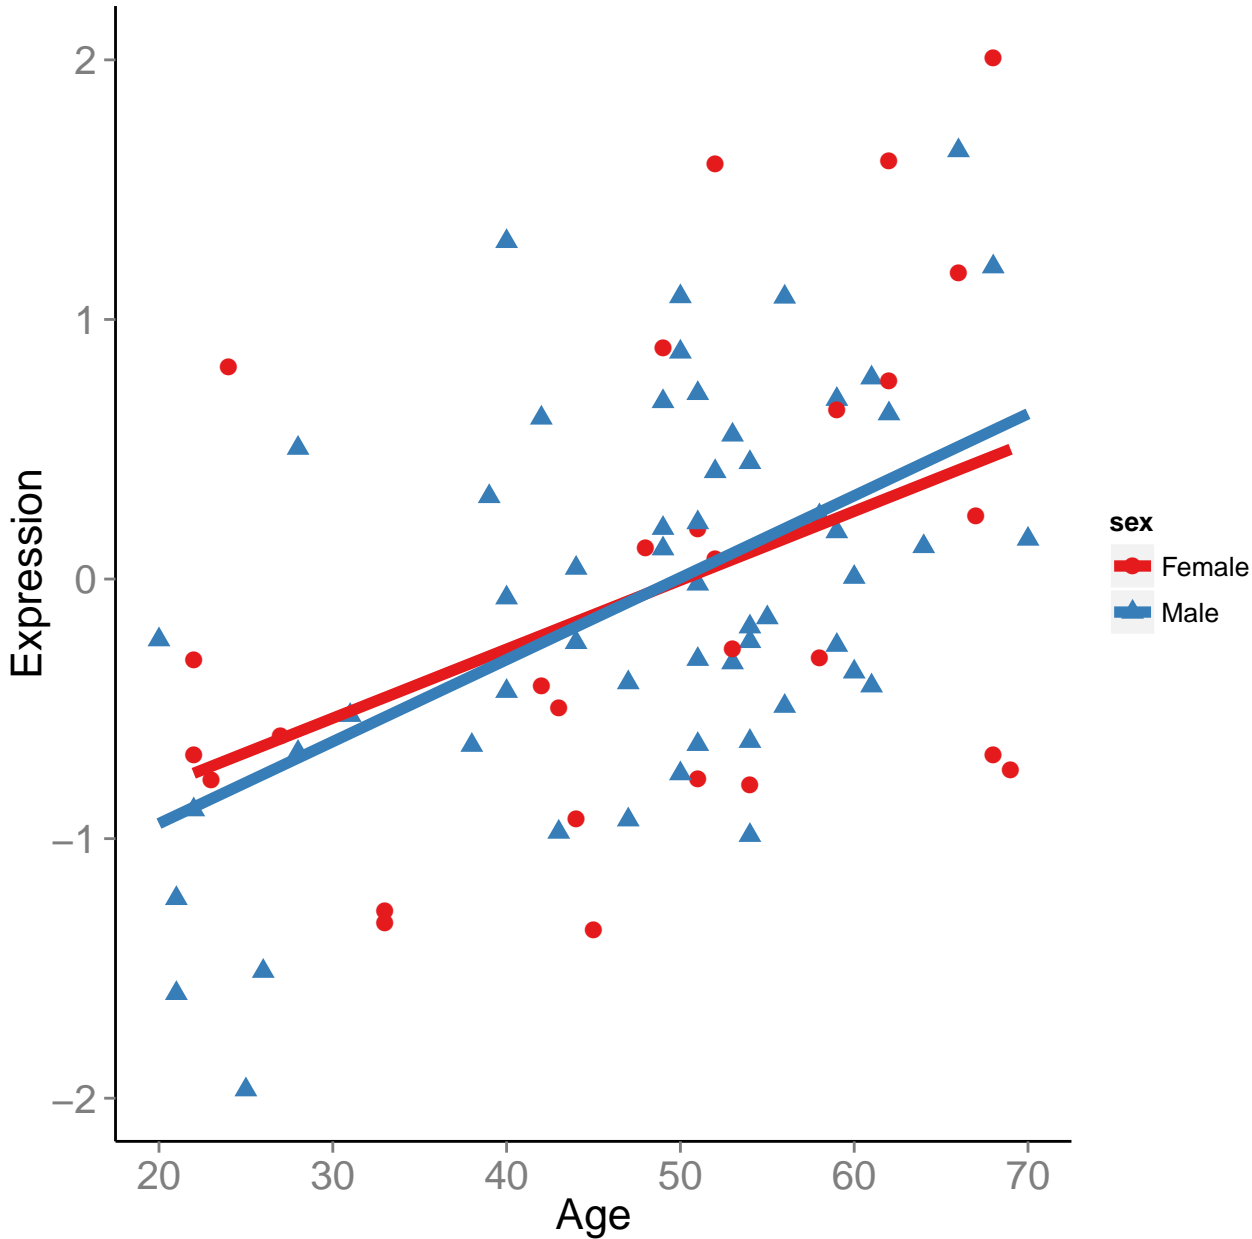

Heart: TENC1 Pearson-R=0.49 Pval=2.94E-06

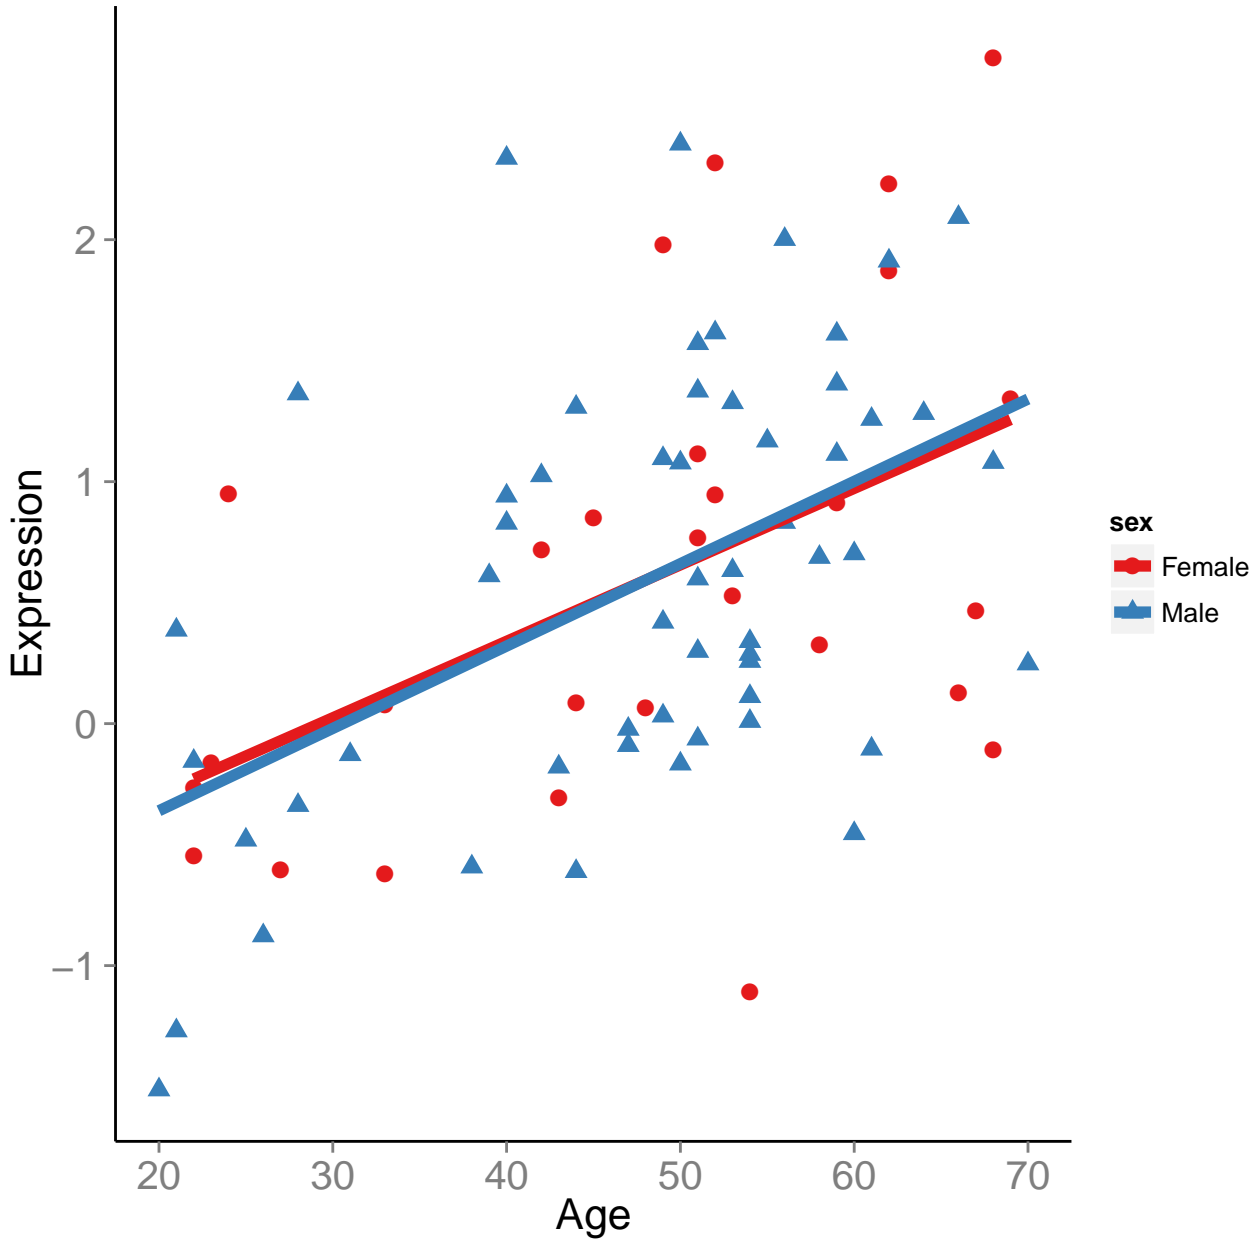

Heart: SLC25A3 Pearson-R=-0.49 Pval=2.94E-06

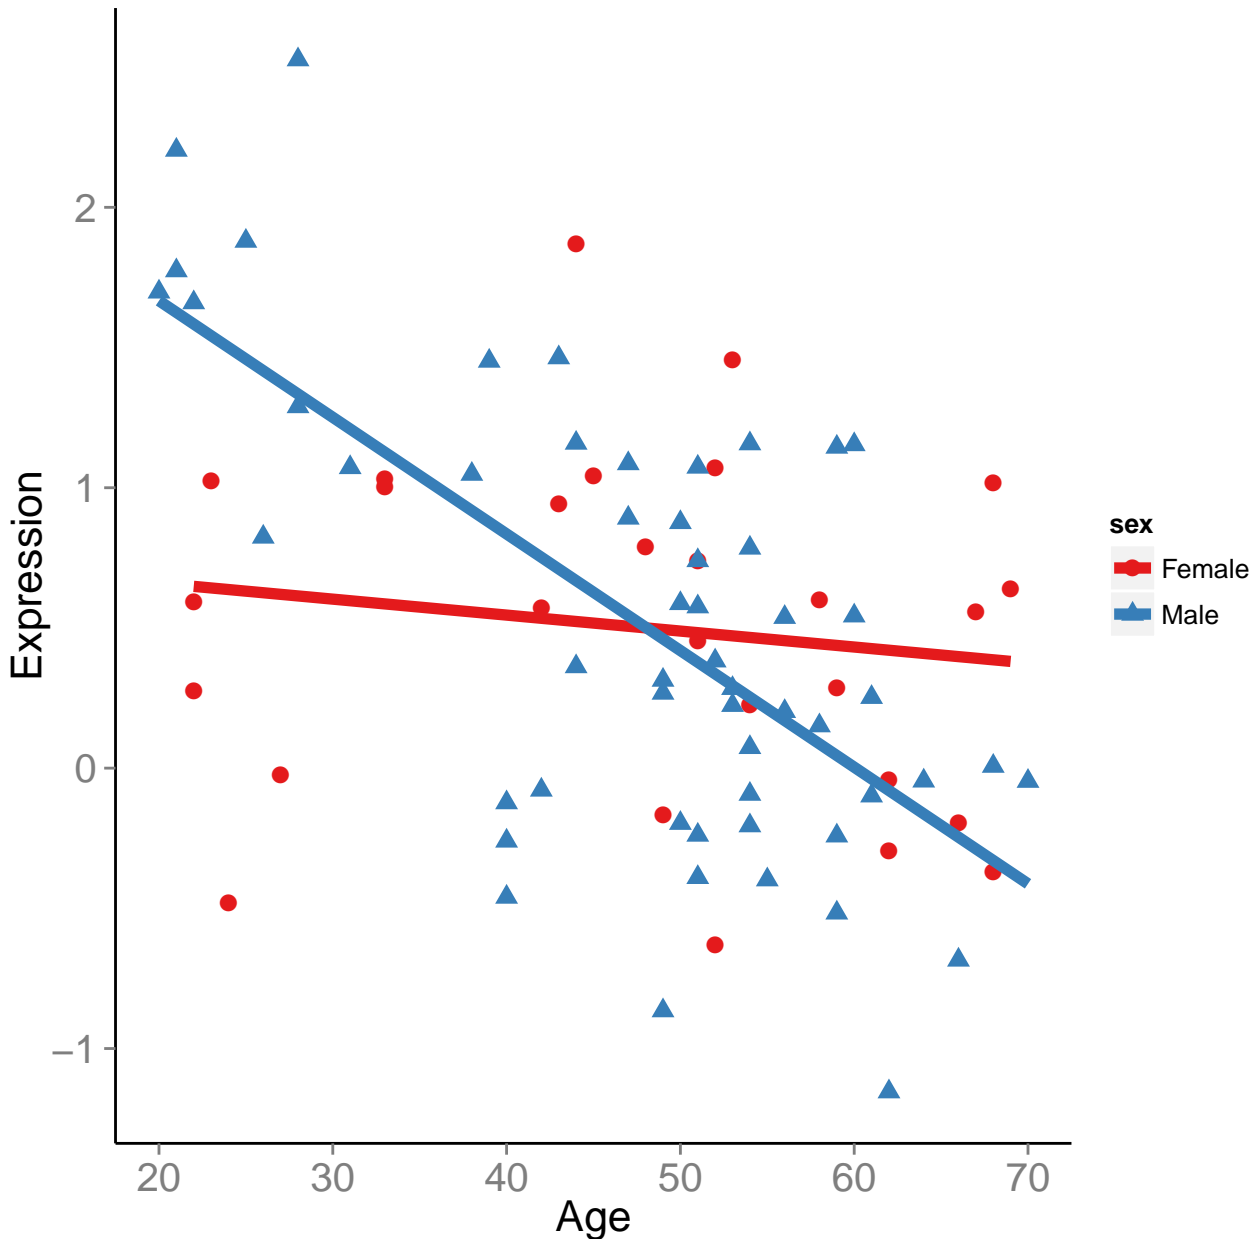

Heart: PPP2CA Pearson-R=-0.49 Pval=2.98E-06

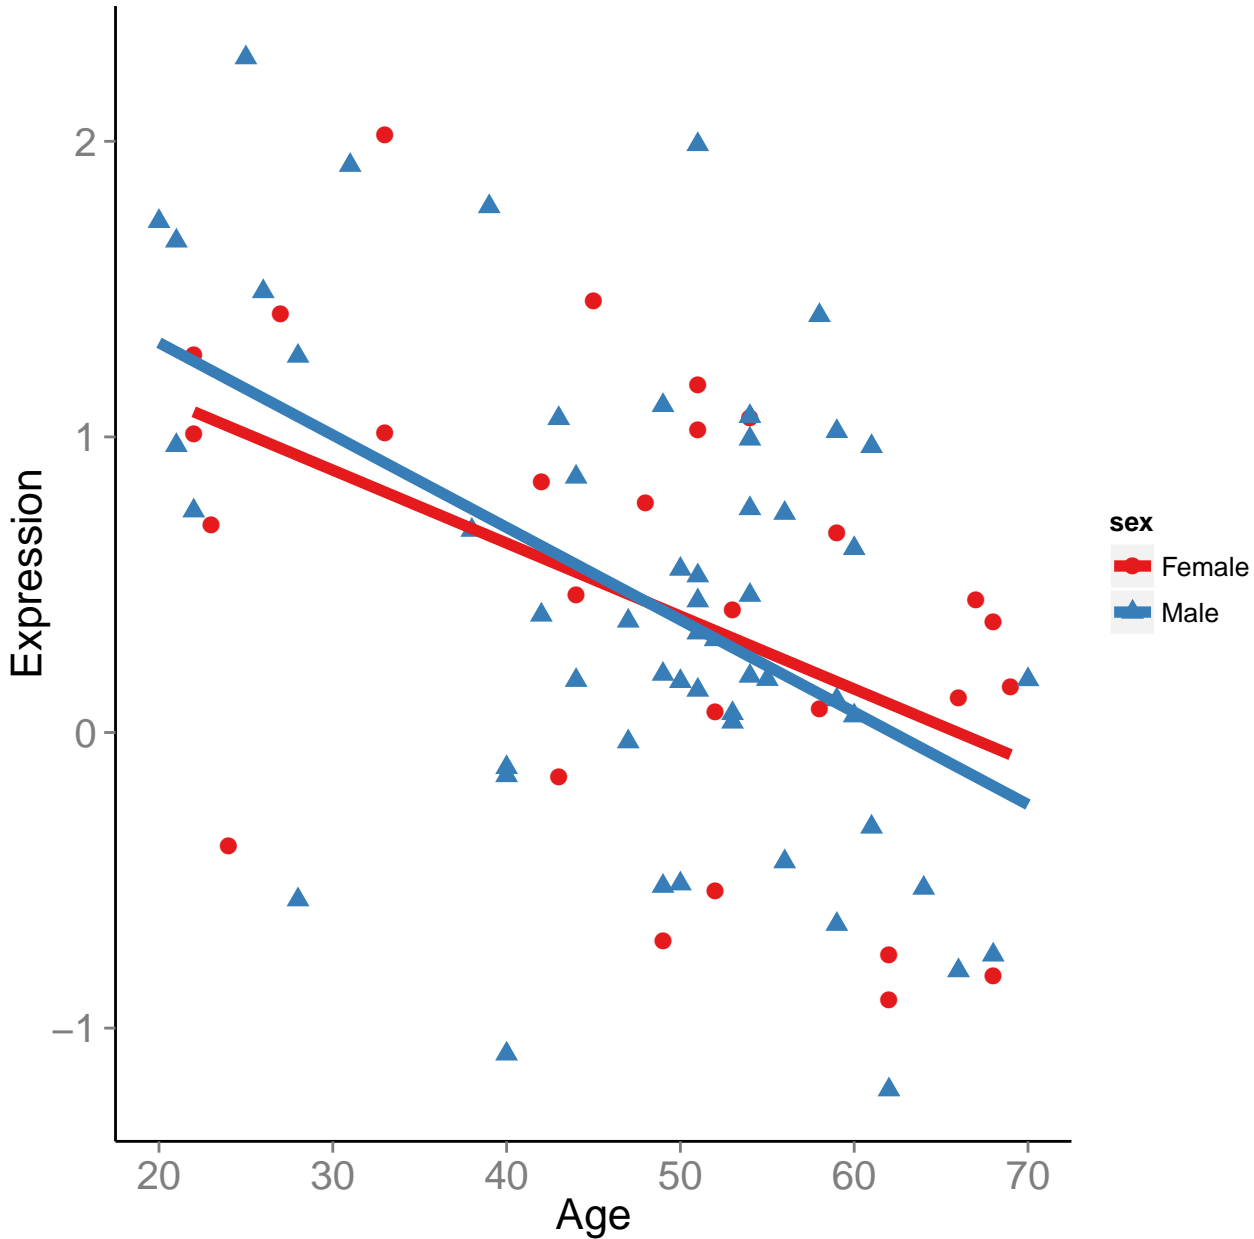



Heart: RRP15 Pearson-R=-0.49 Pval=2.94E-06

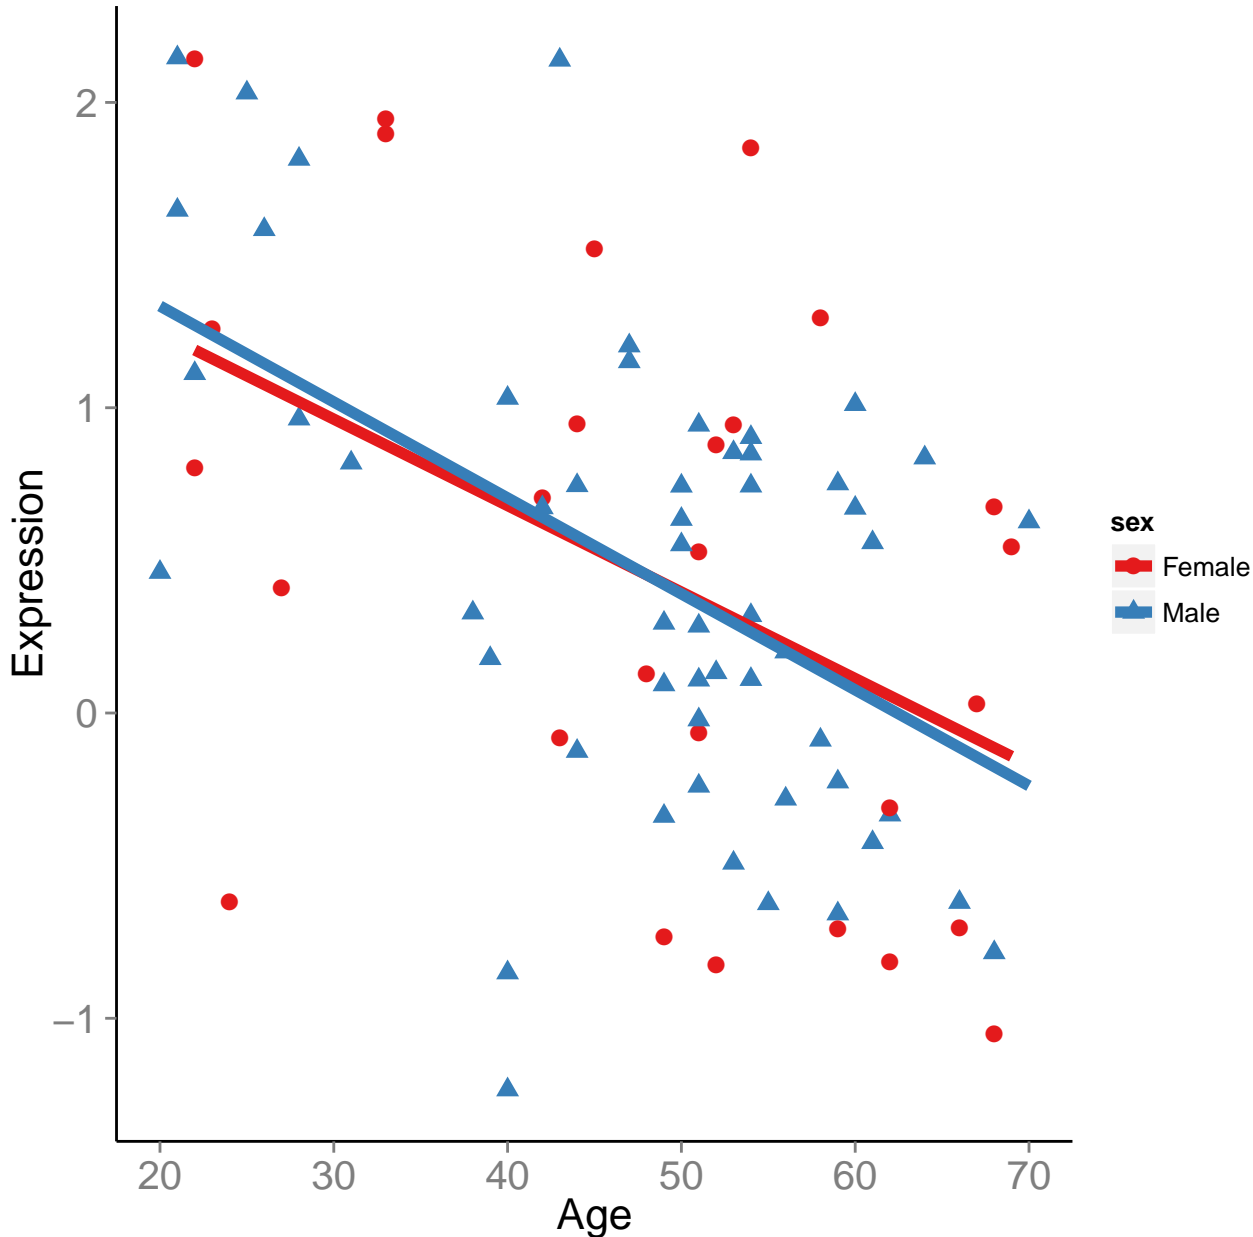

Heart: HSPA13 Pearson-R=-0.49 Pval=2.75E-06

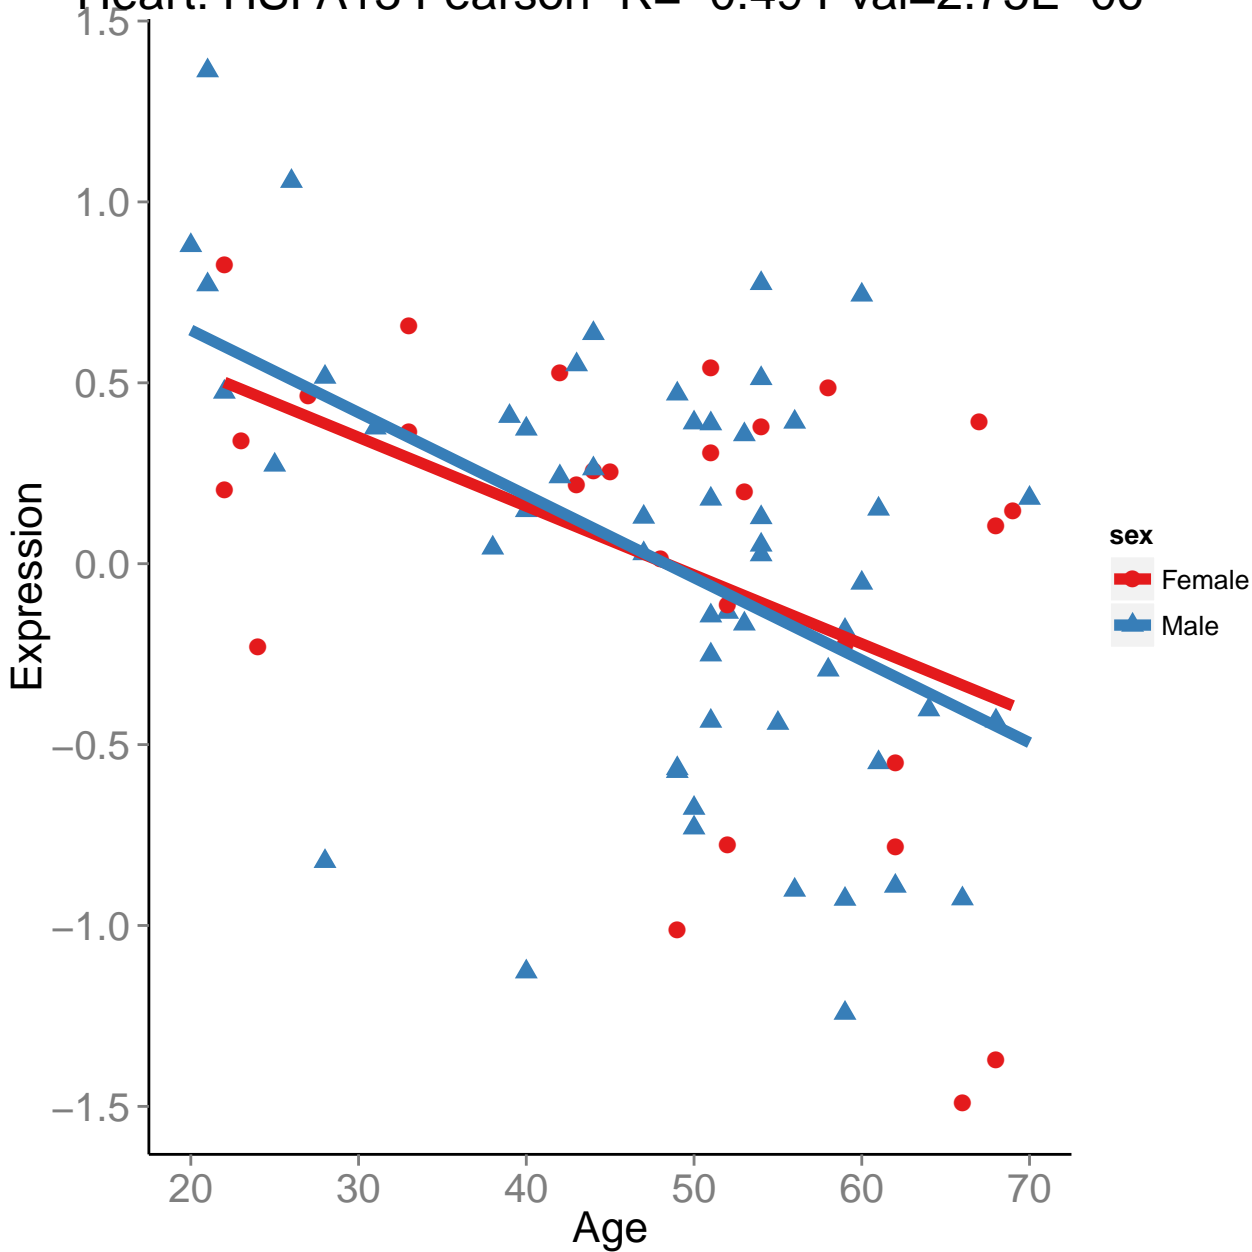

Heart: USP40 Pearson-R=0.49 Pval=2.78E-06

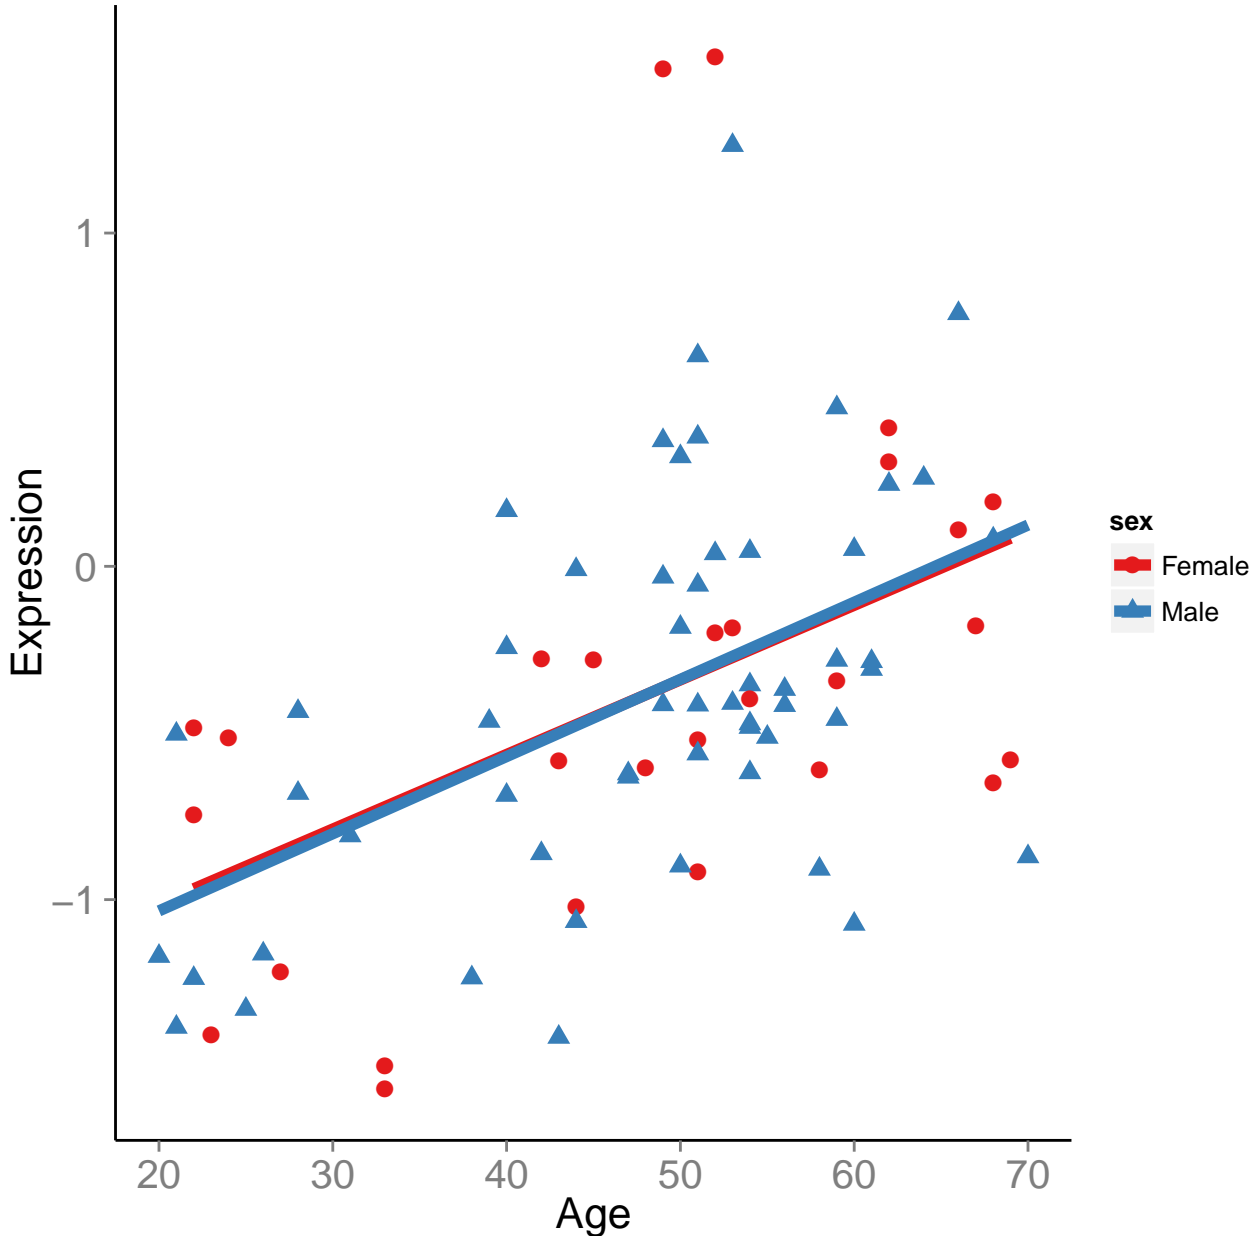

Heart: LPCAT1 Pearson-R=0.48 Pval=3.41E-06

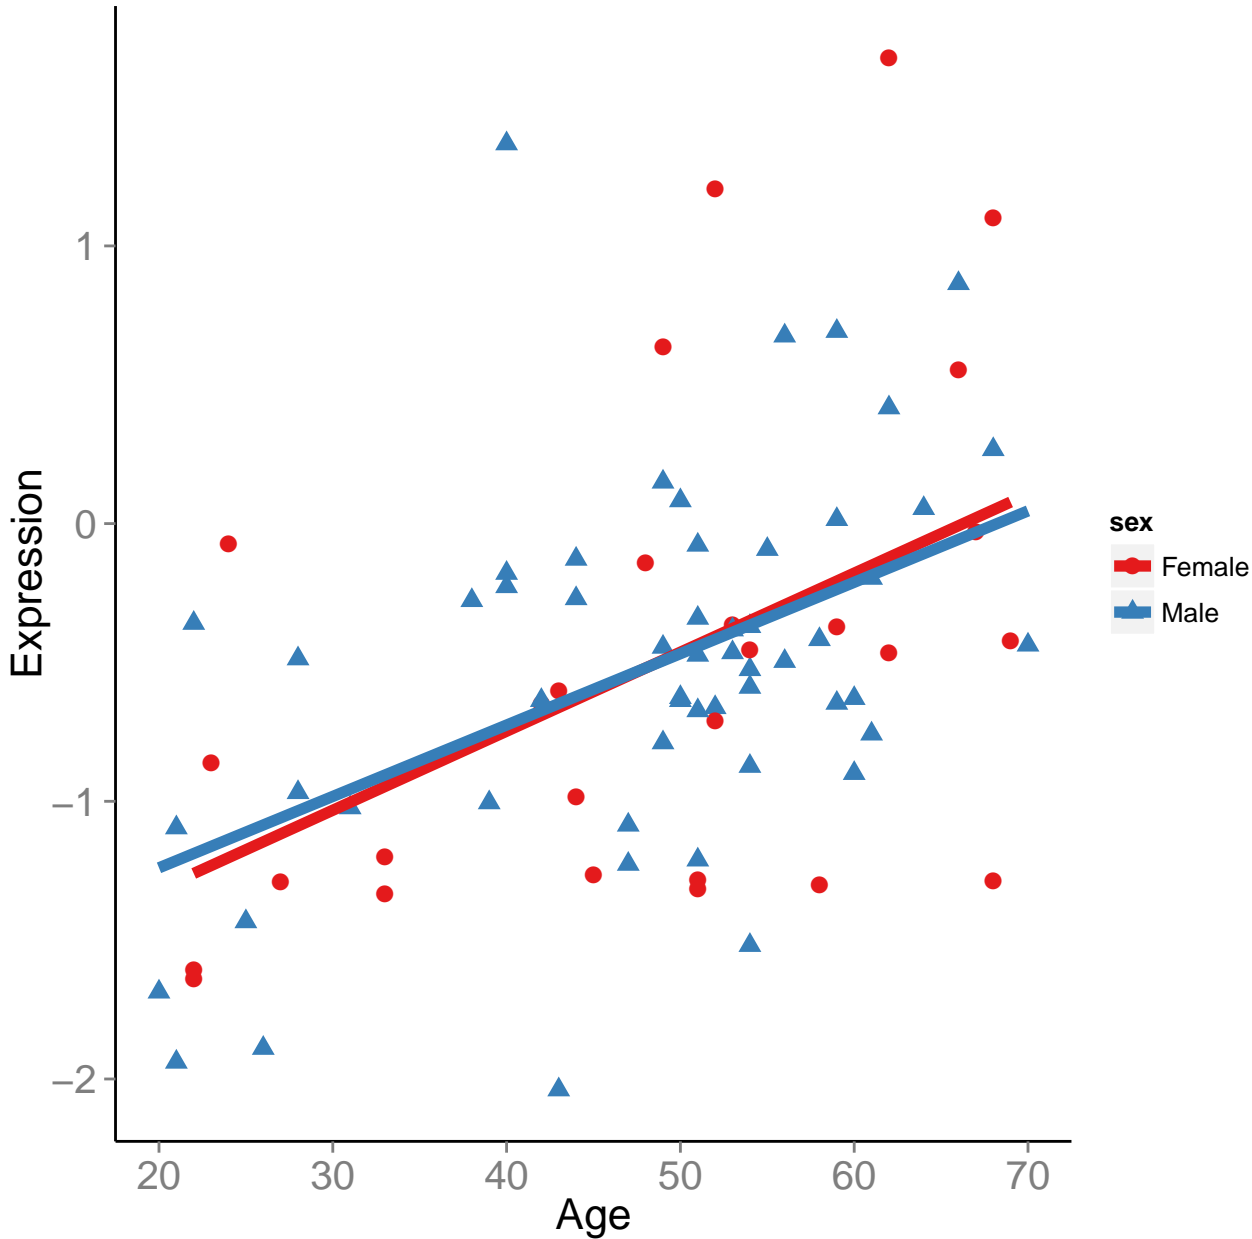

Heart: MOB3A Pearson-R=0.49 Pval=3.16E-06

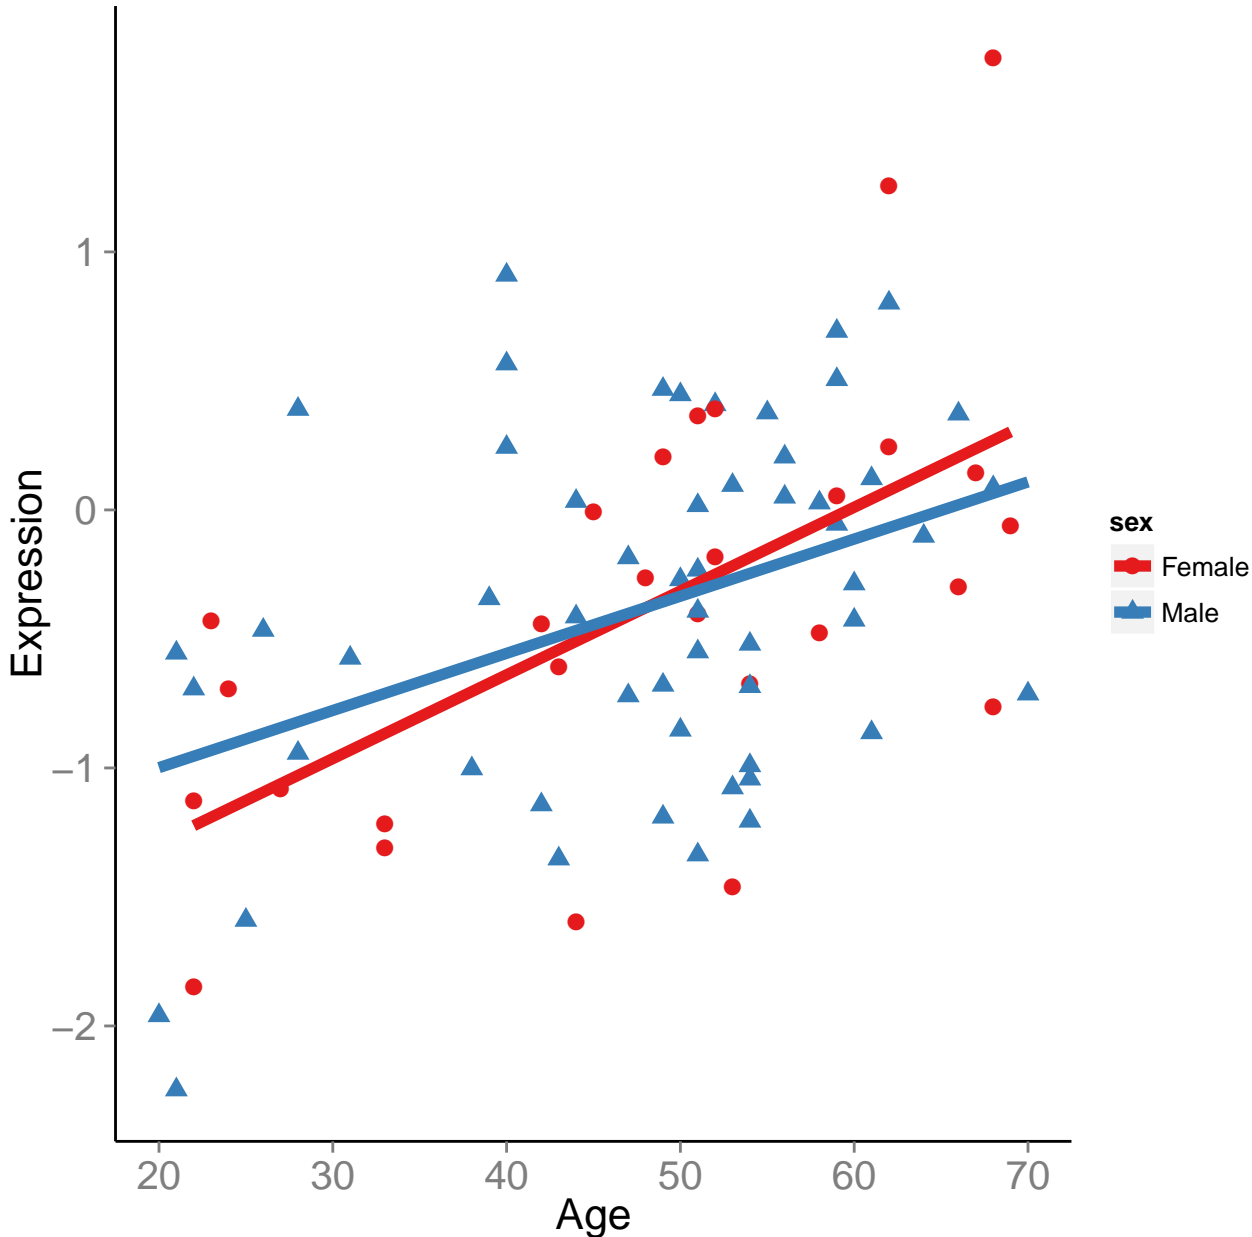

Heart: ARRDC2 Pearson-R=0.48 Pval=3.43E-06

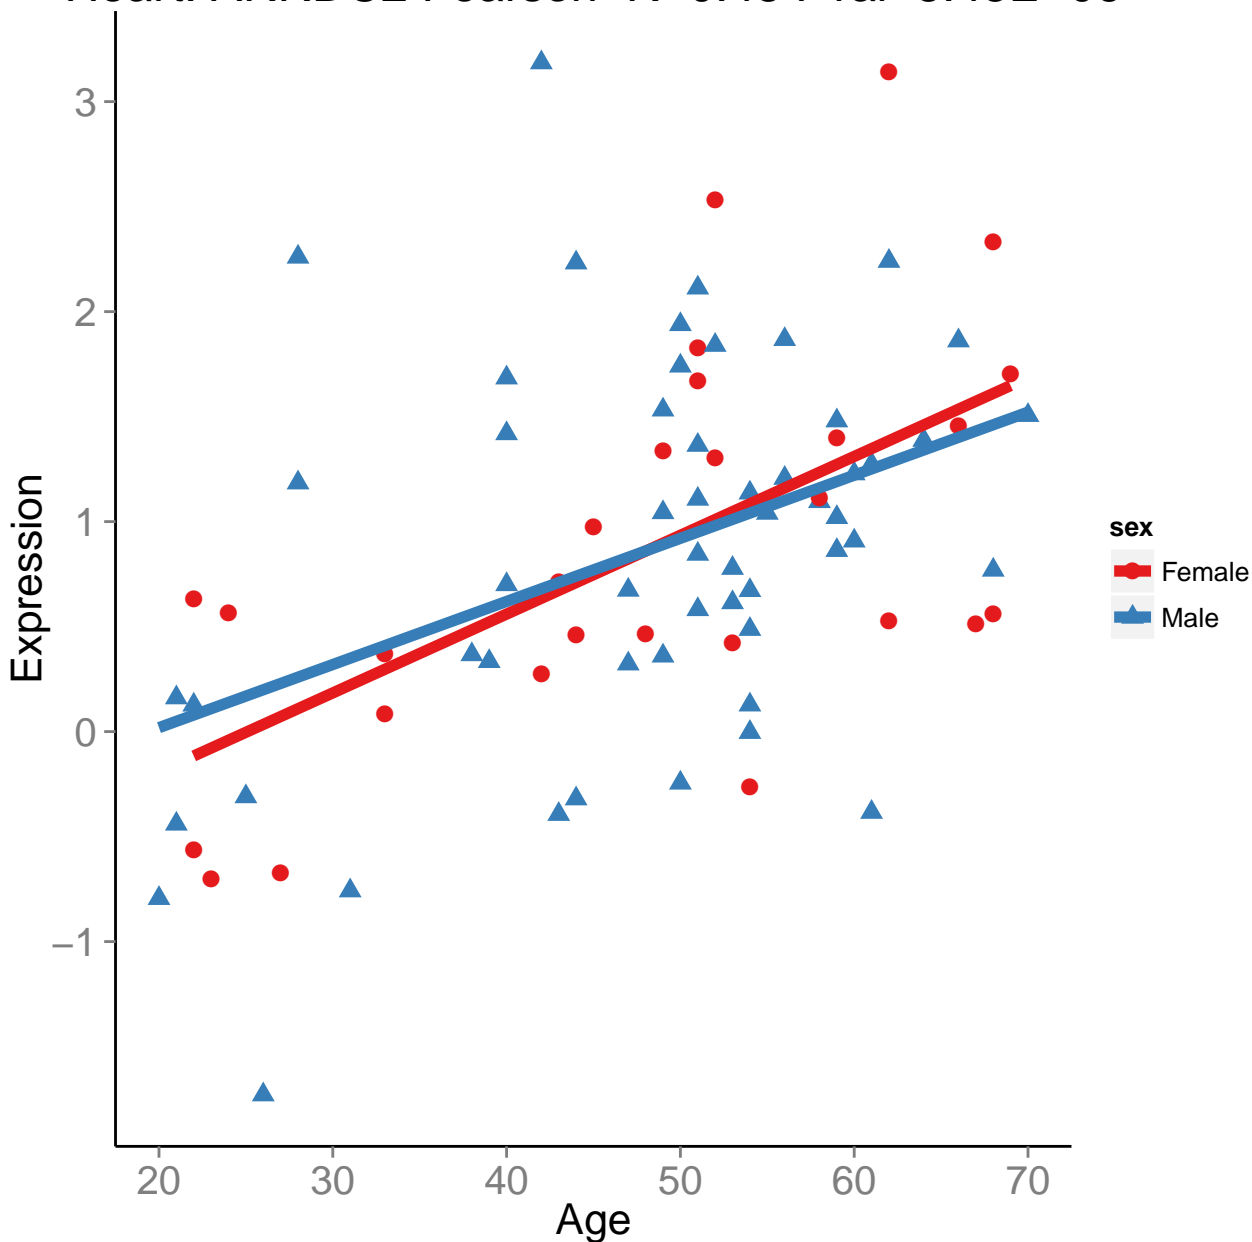

Heart: SDCCAG3 Pearson-R=0.49 Pval=3.31E-06

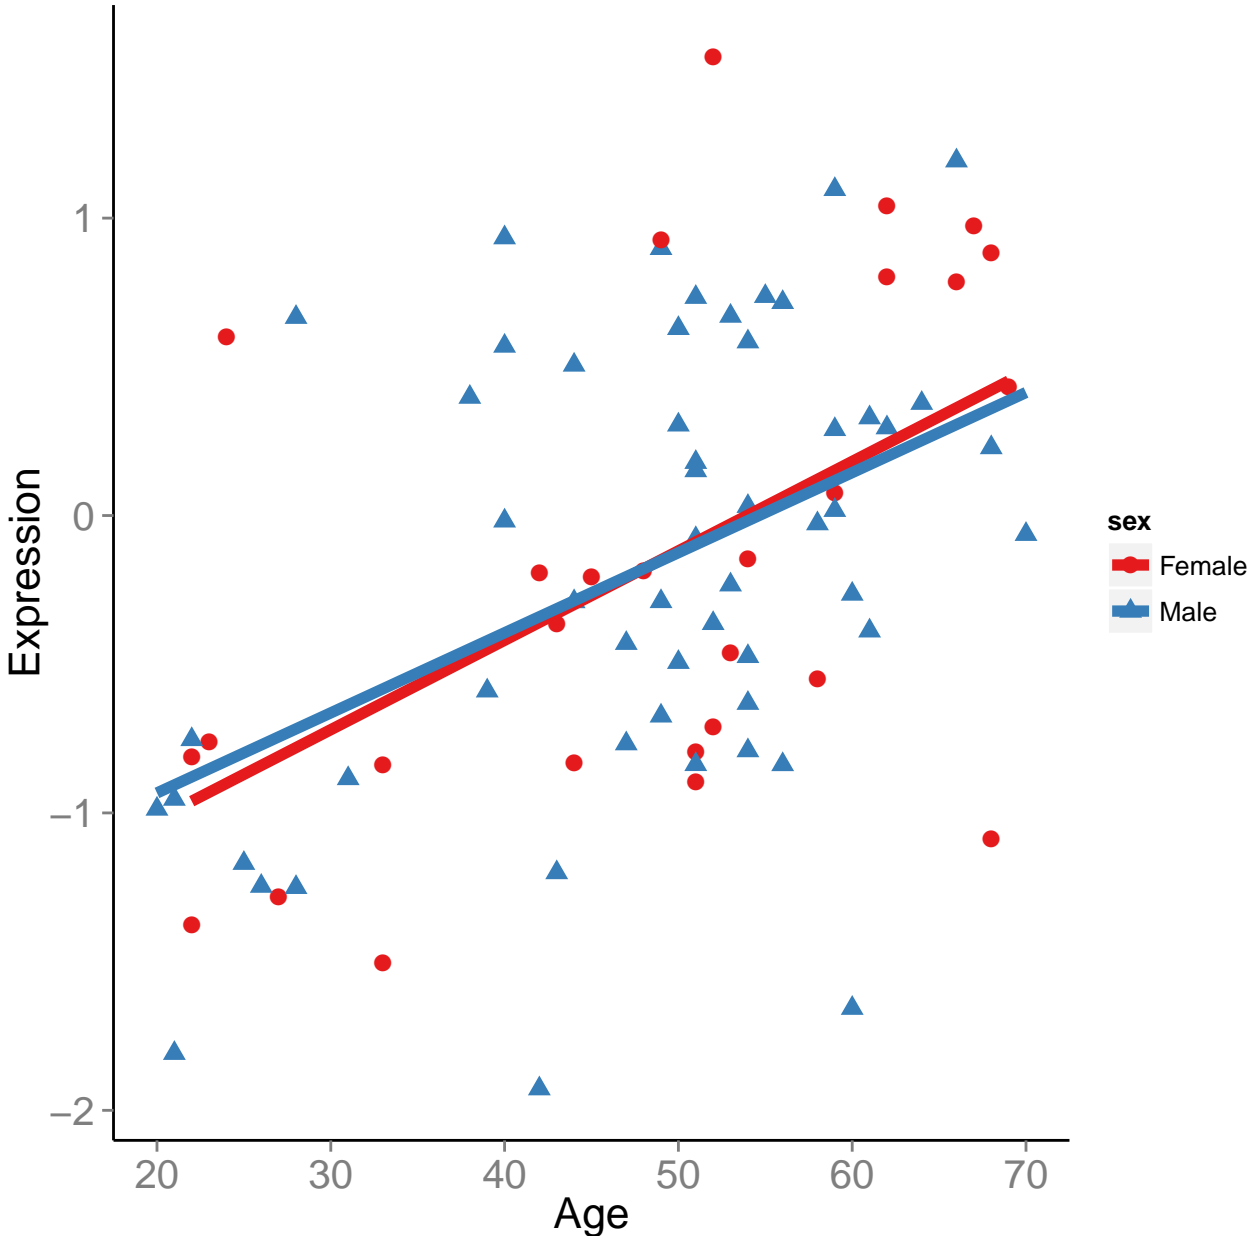

Heart: RP11-552M11.4 Pearson-R=-0.49 Pval=3.19E-06

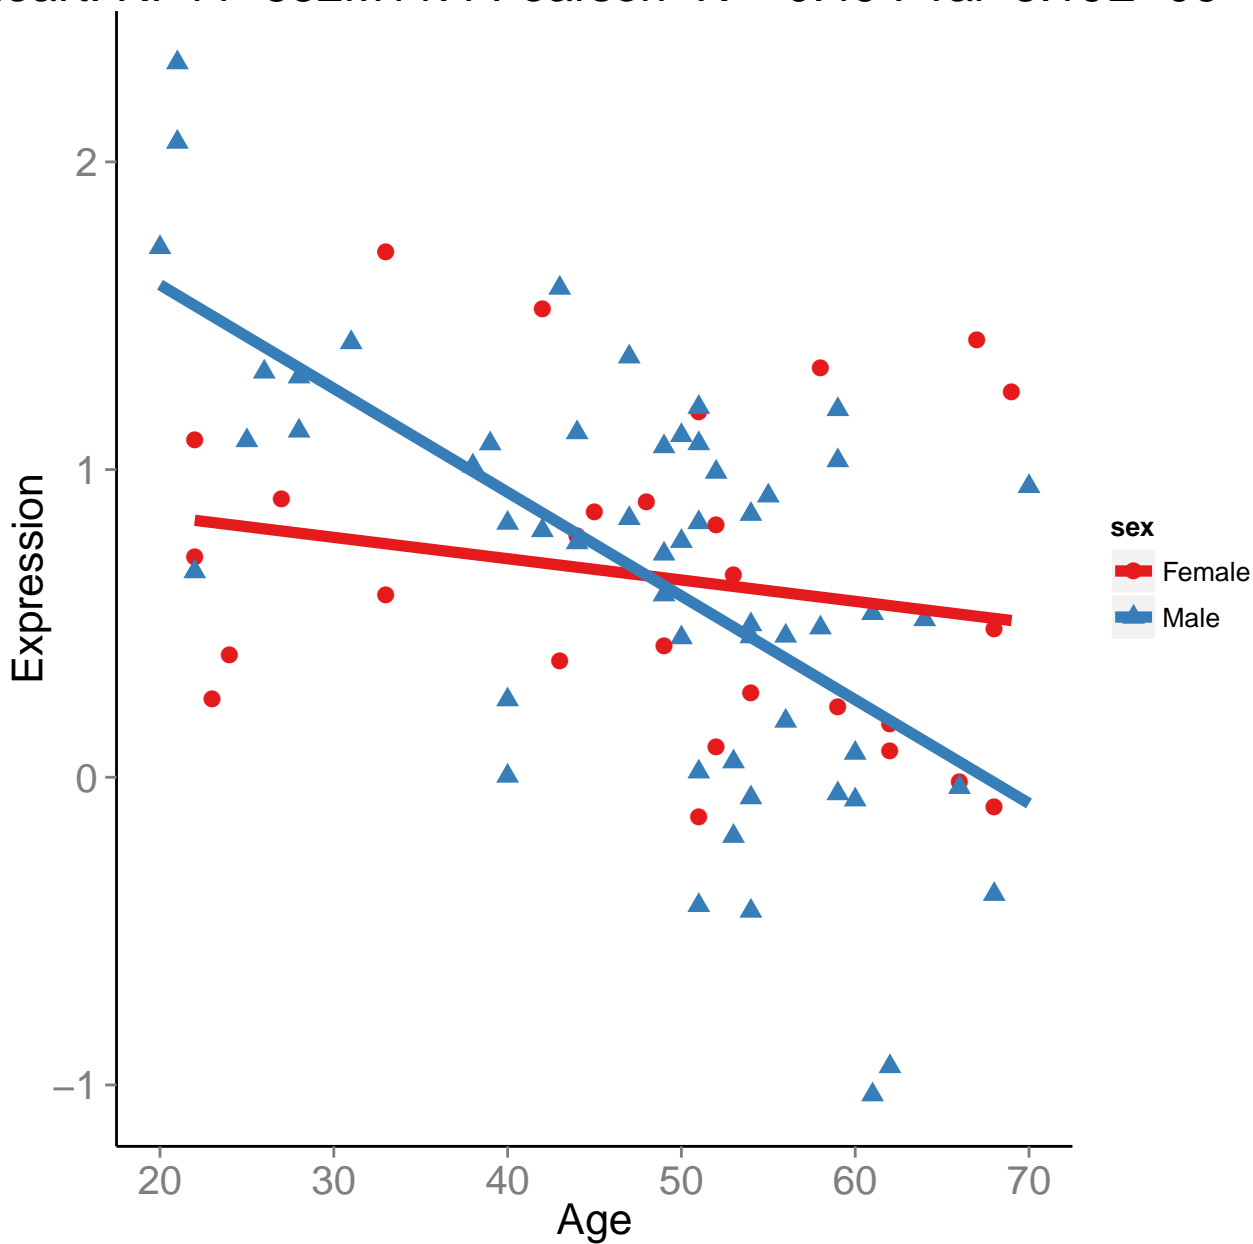



Heart: RP11-31F19.1 Pearson-R=0.48 Pval=4.01E-06

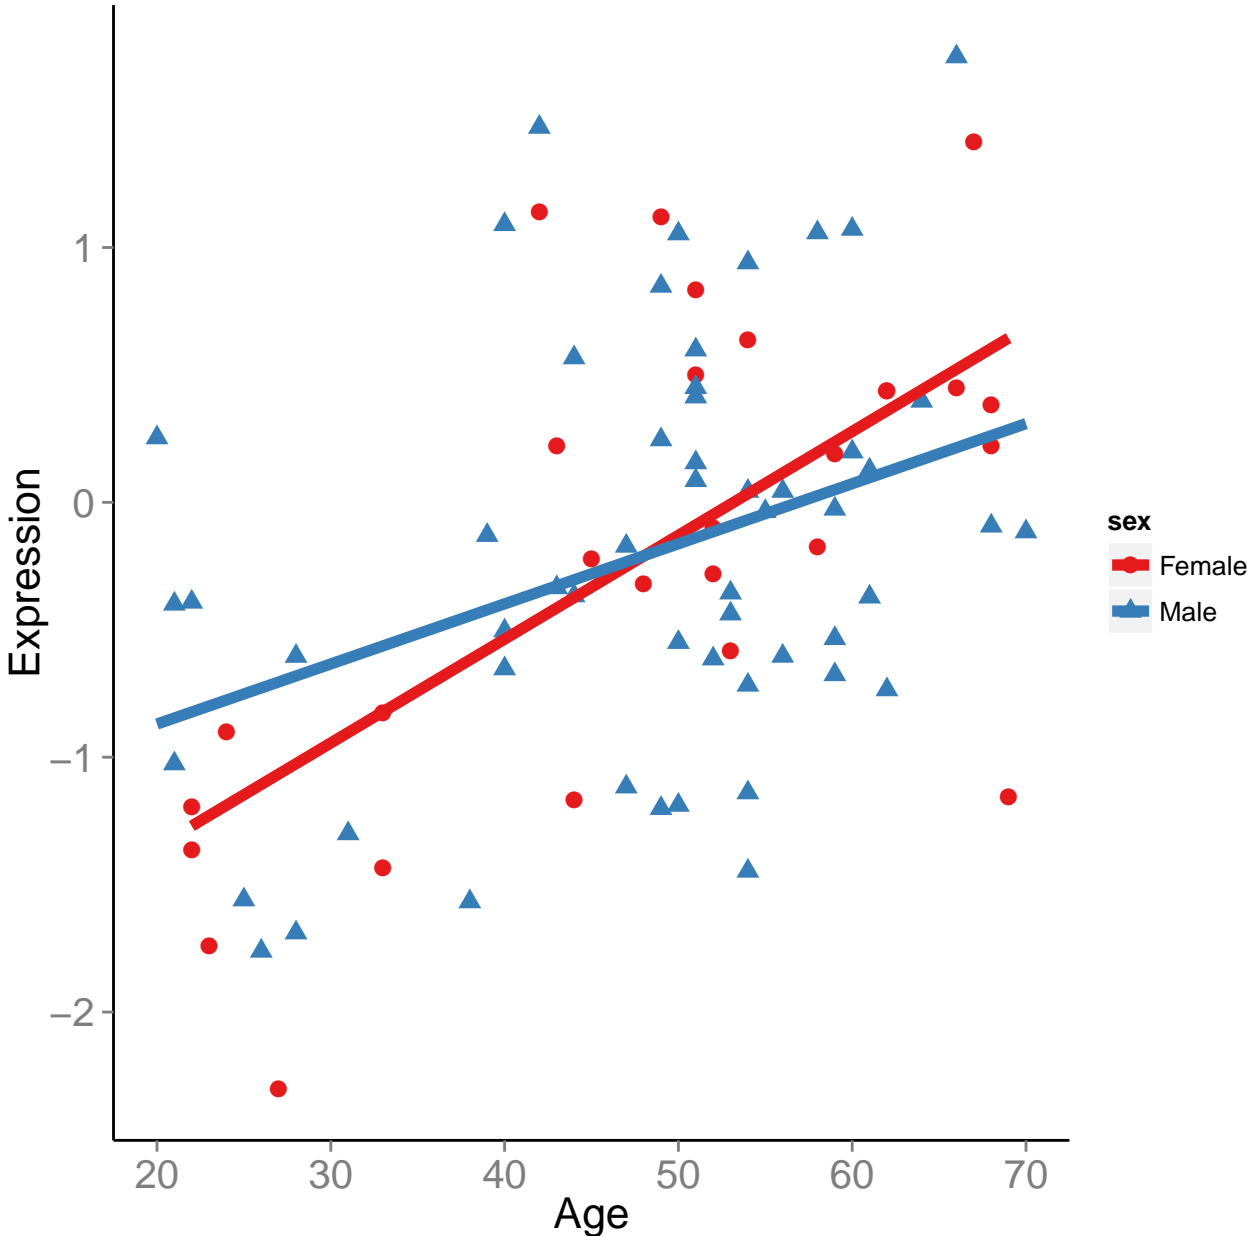

Heart: ENOPH1 Pearson-R=-0.48 Pval=3.63E-06

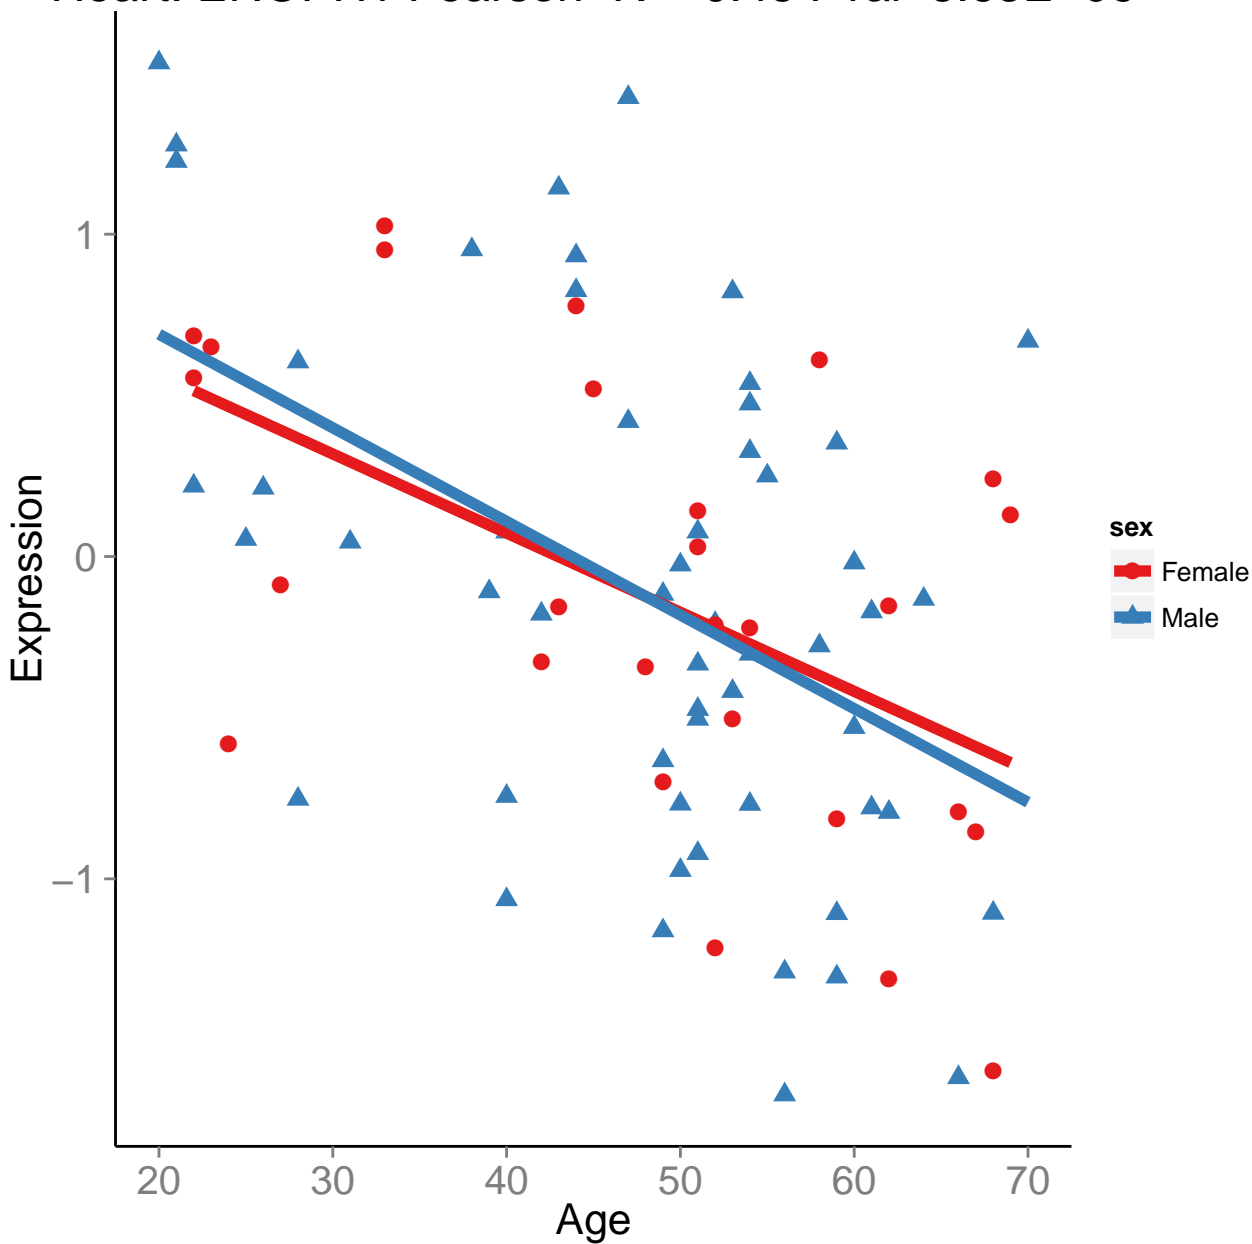

Heart: PLEKHB2 Pearson-R=-0.48 Pval=3.98E-06

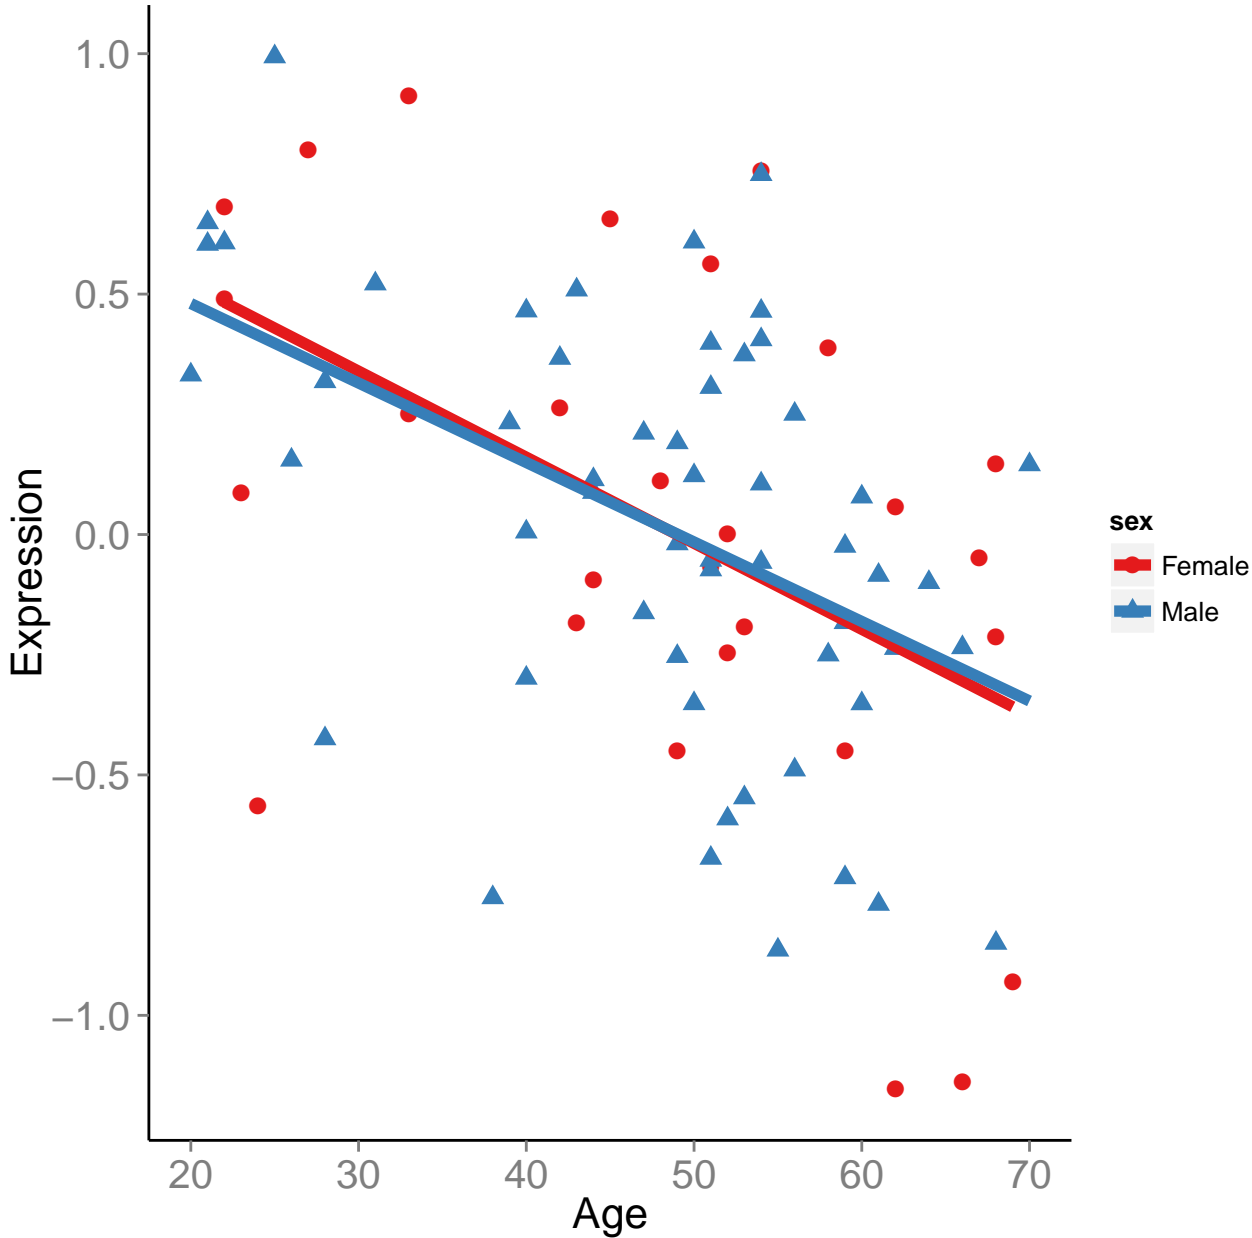

Heart: BCL6 Pearson-R=0.48 Pval=3.98E-06

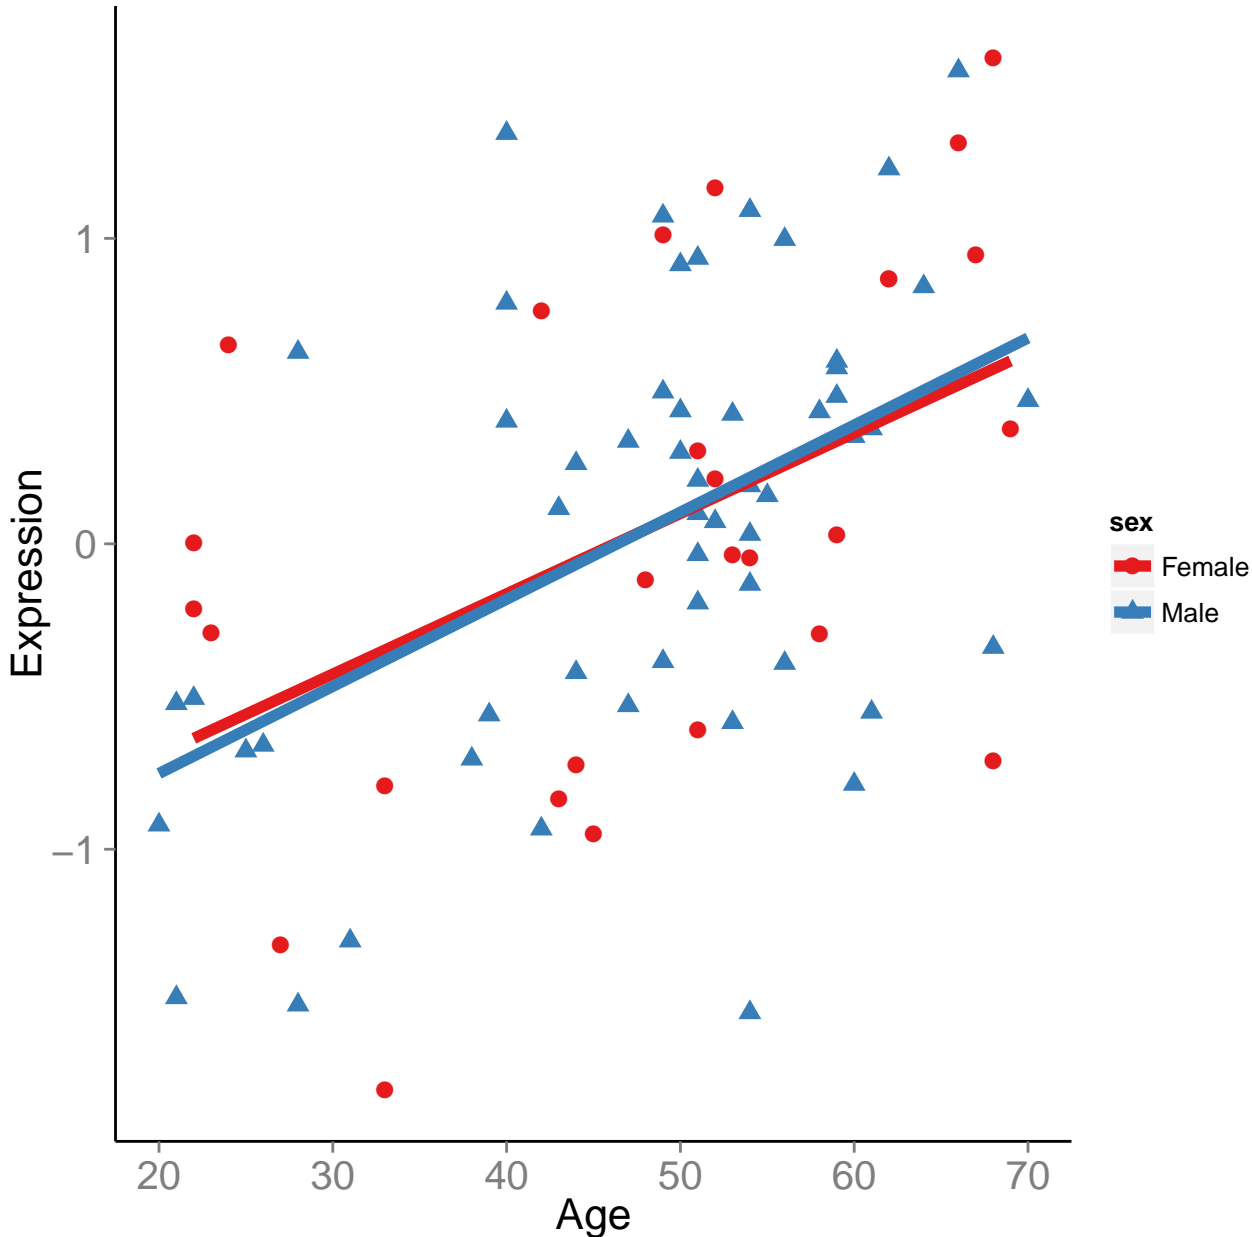

Heart: ZNF76 Pearson-R=0.48 Pval=3.59E-06

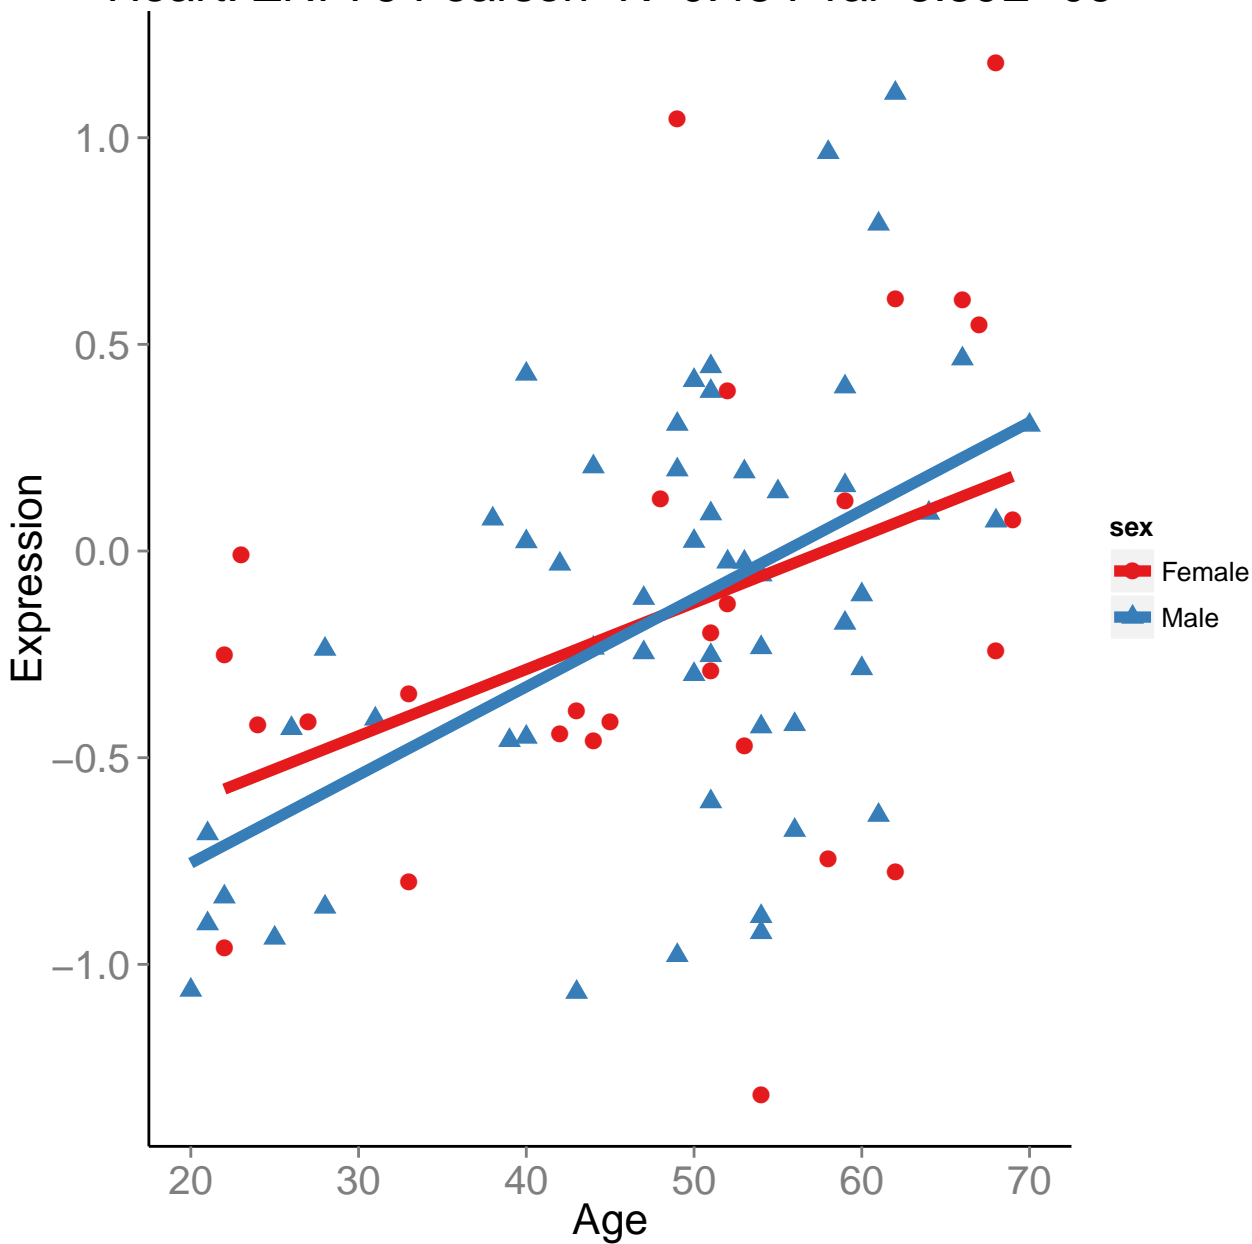

Heart: CBFA2T2 Pearson-R=0.48 Pval=4.02E-06

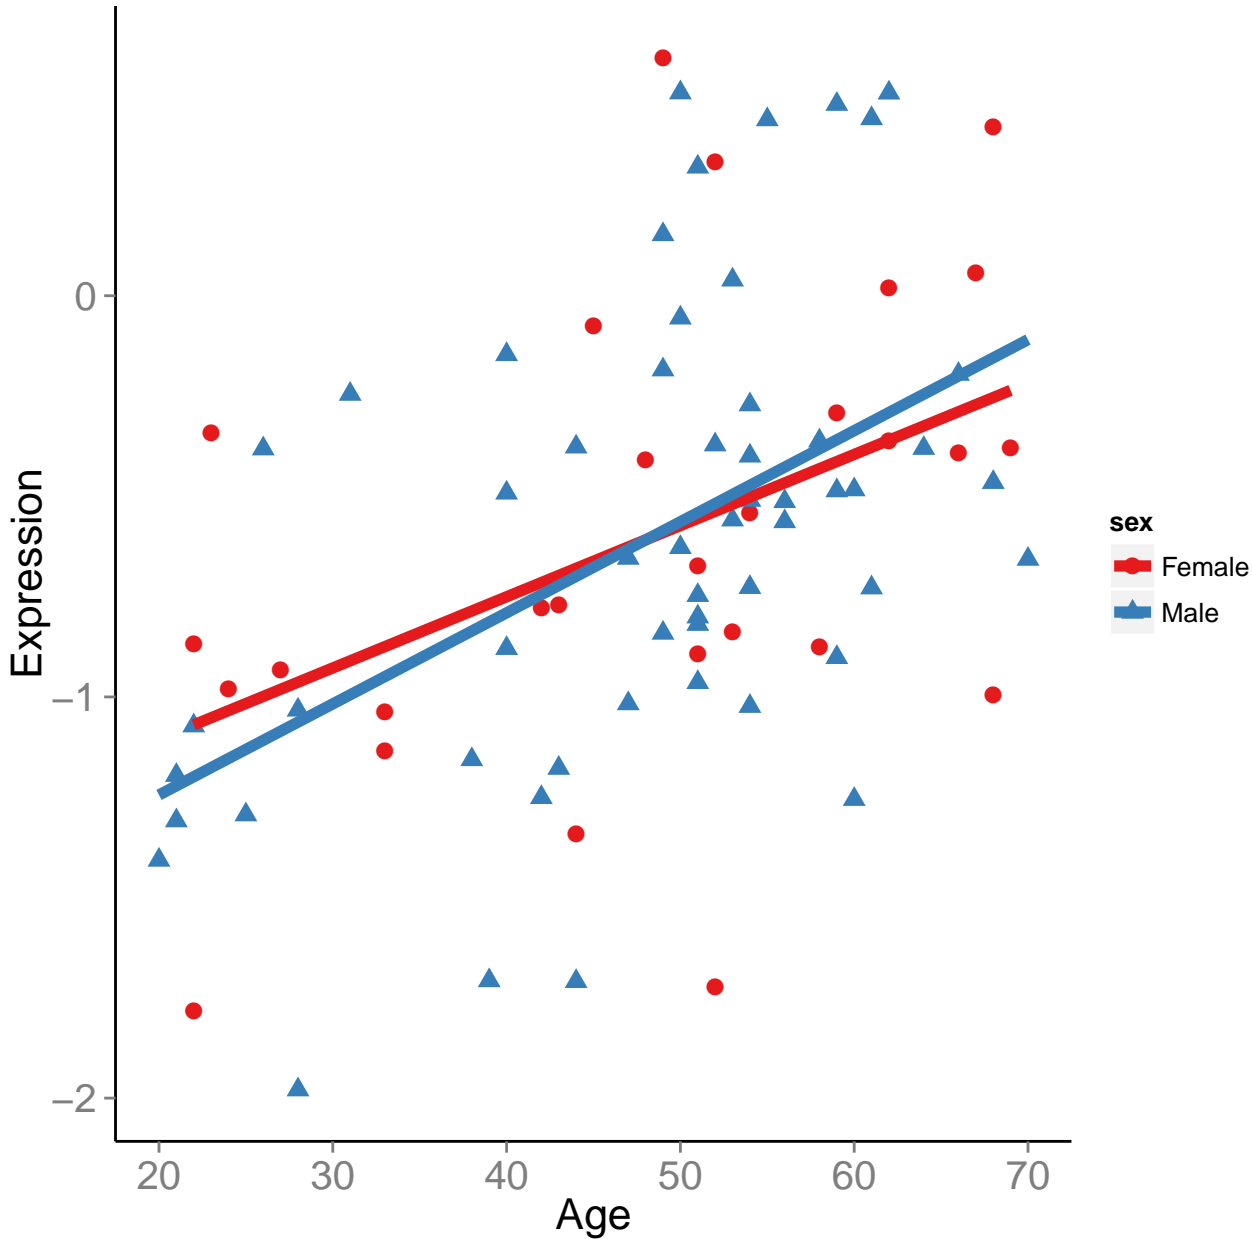

Heart: VAMP7 Pearson-R=-0.48 Pval=4.33E-06

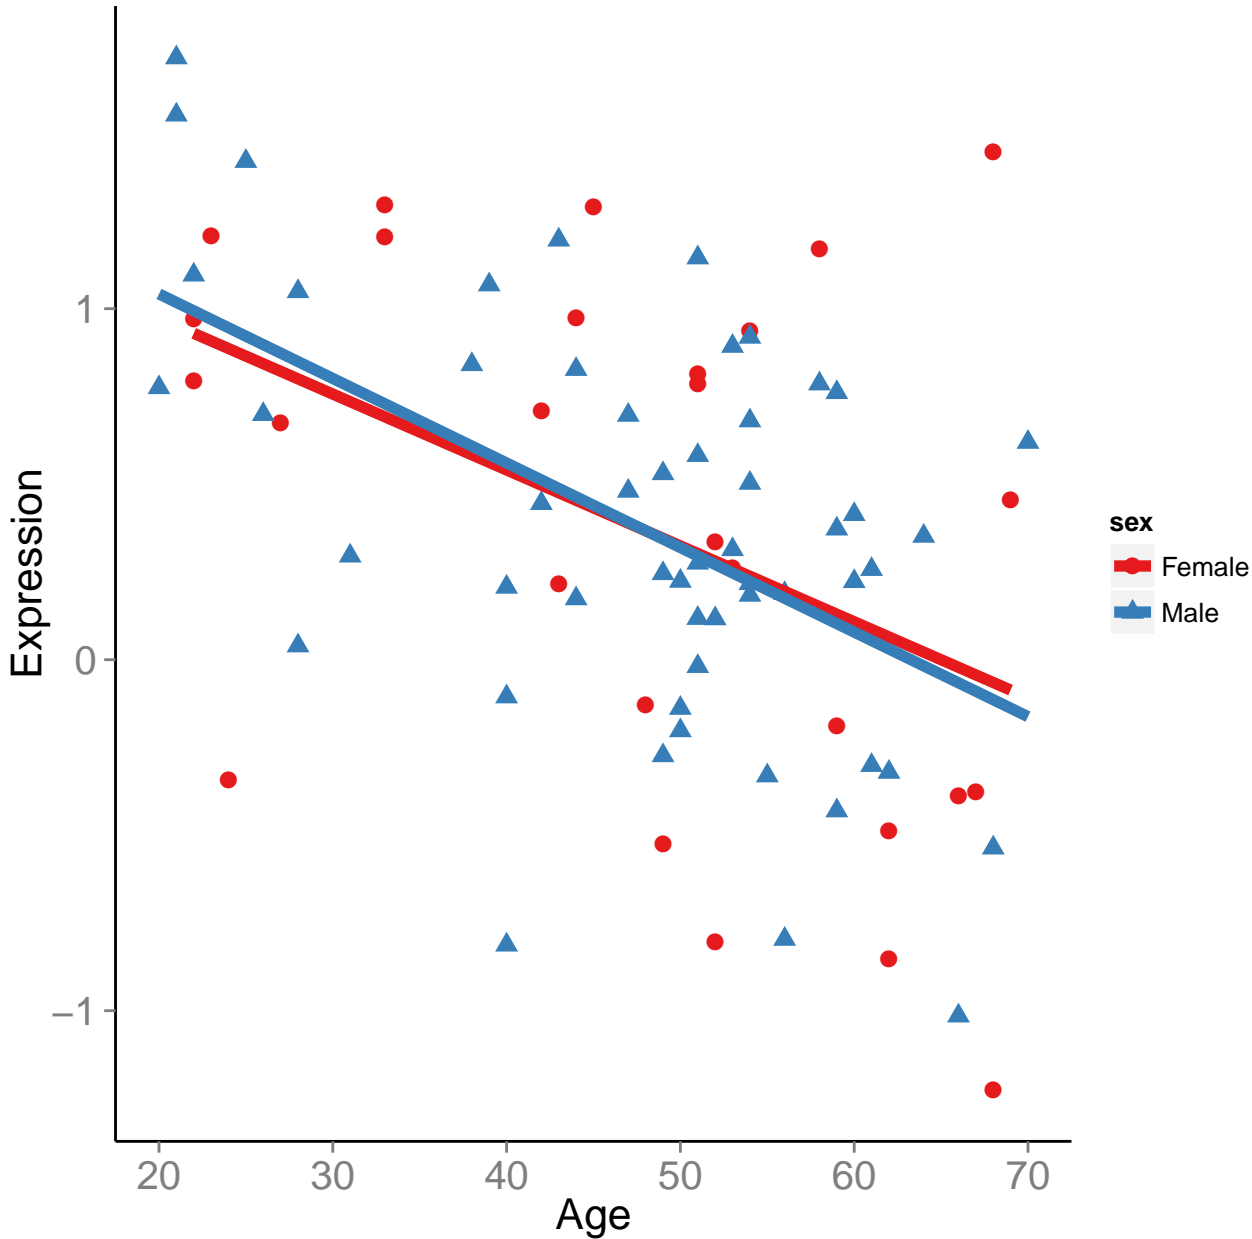

Heart: TOP3B Pearson-R=0.48 Pval=4.36E-06

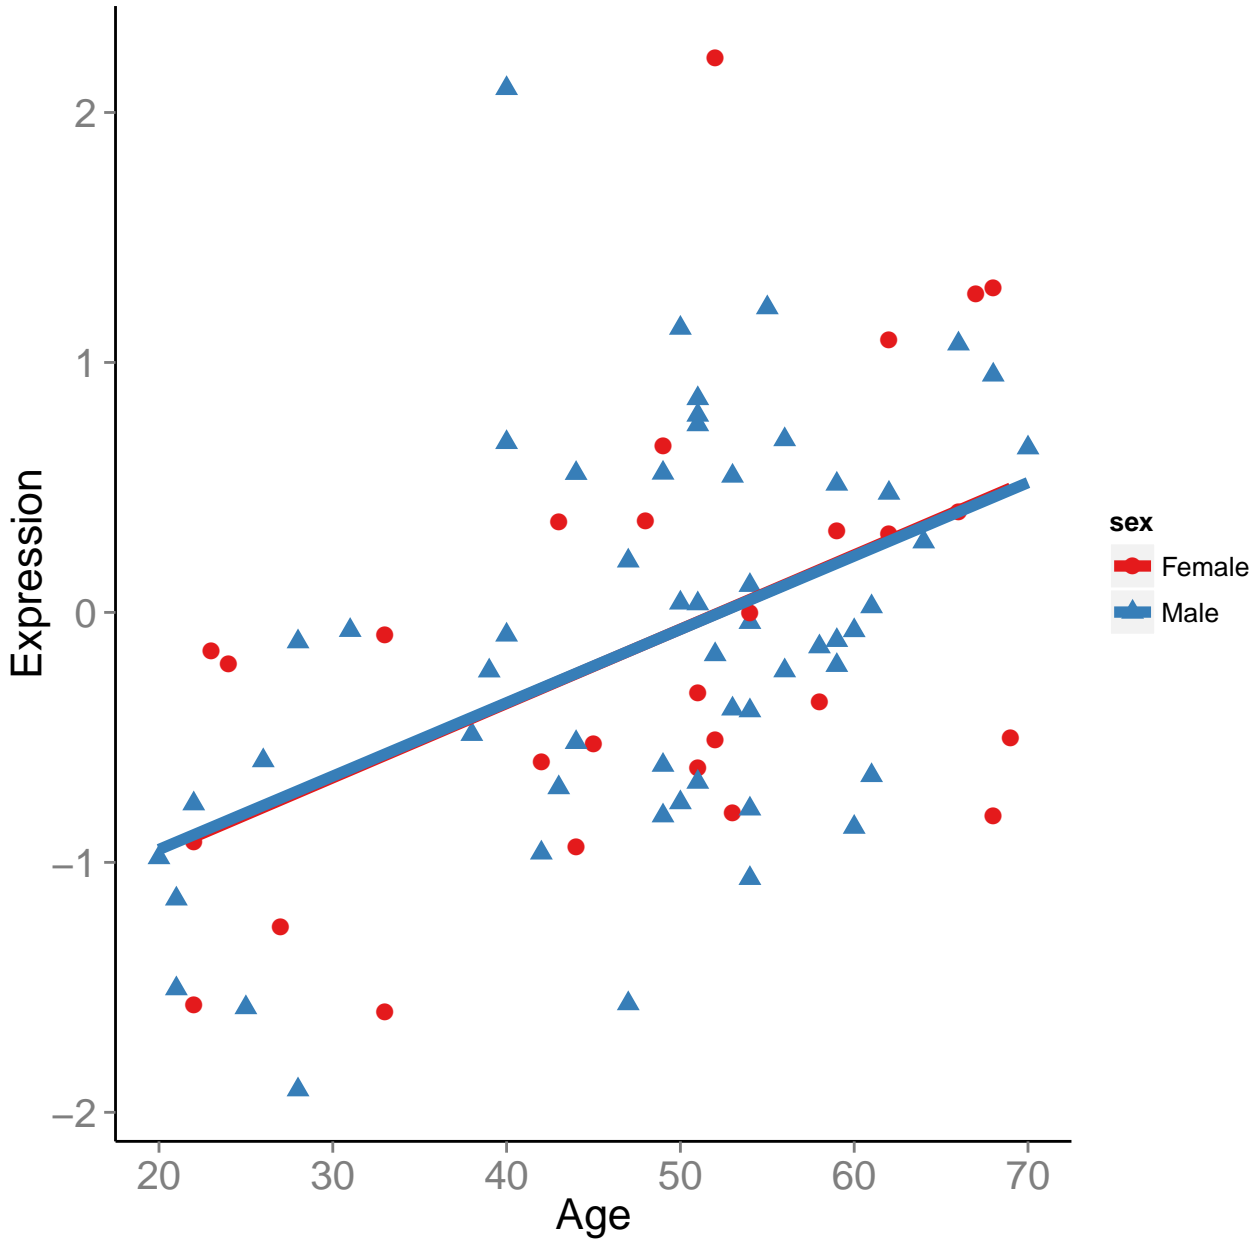



Heart: SMARCD2 Pearson-R=0.48 Pval=4.55E-06

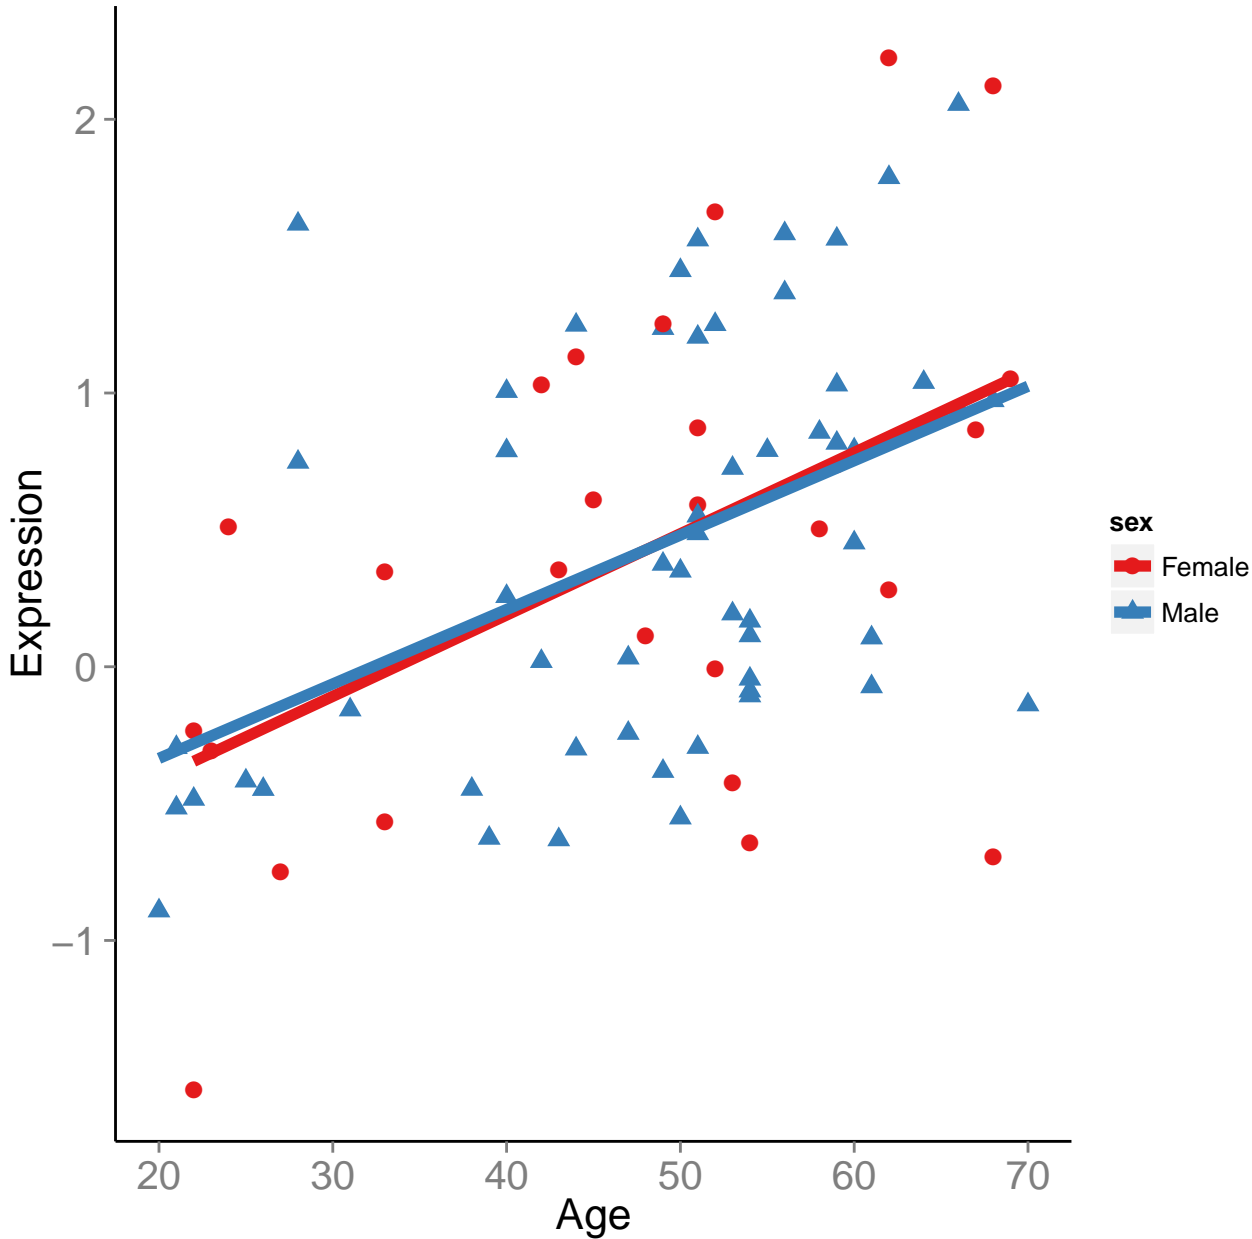

Heart: NDUFS4 Pearson-R=-0.48 Pval=4.68E-06

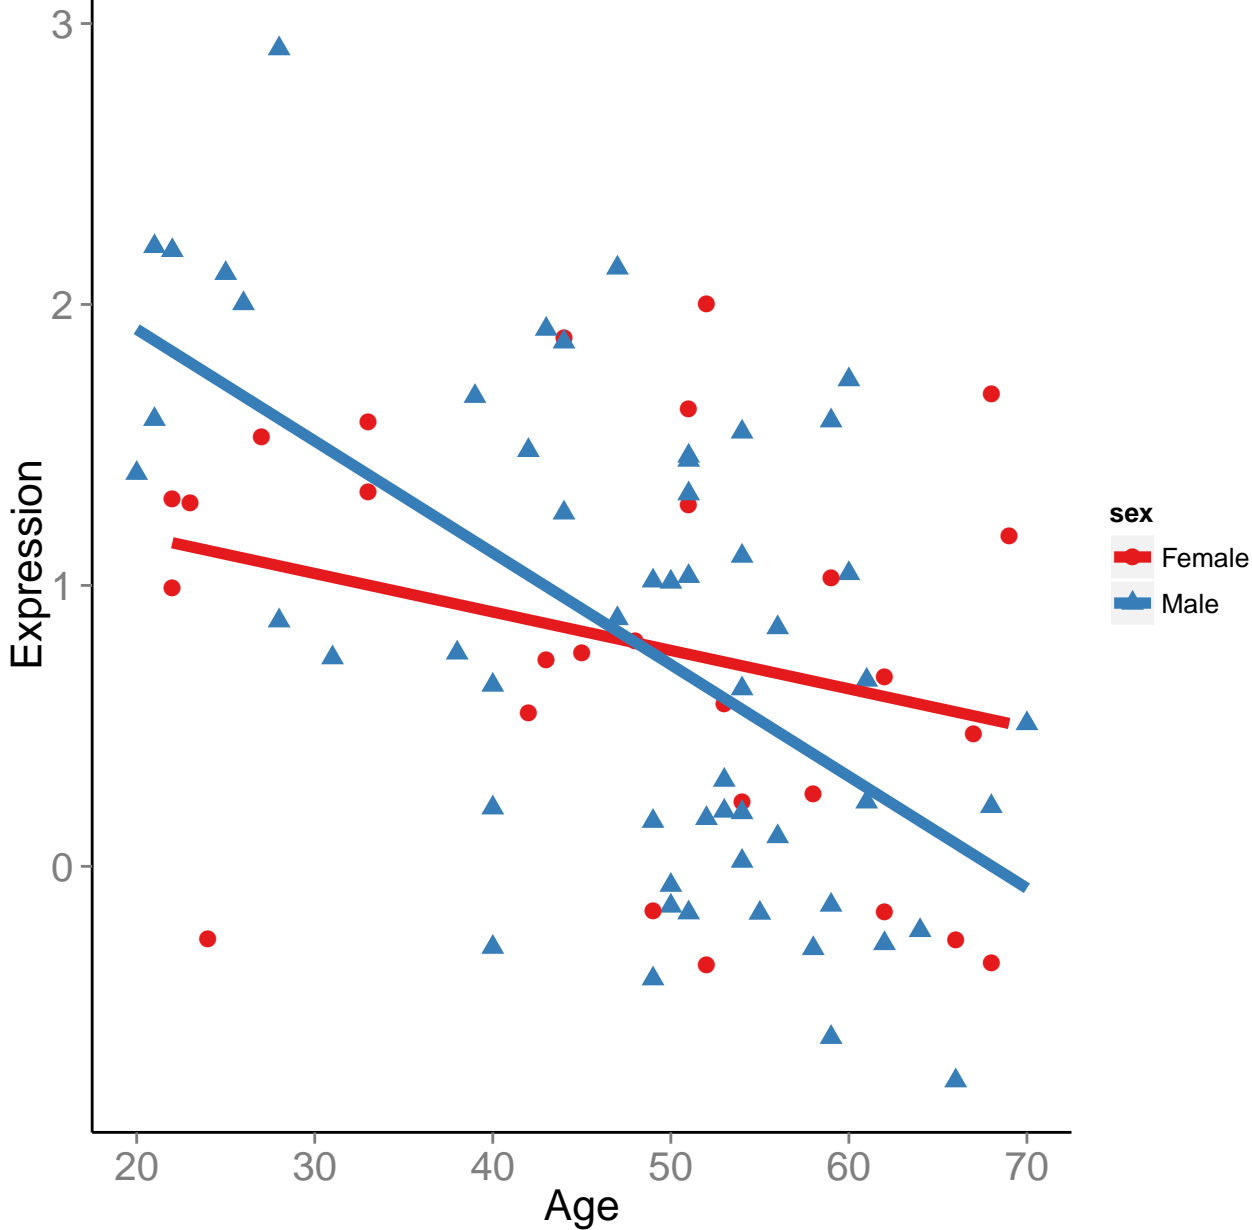

Heart: SLCO4A1 Pearson-R=0.48 Pval=4.76E-06

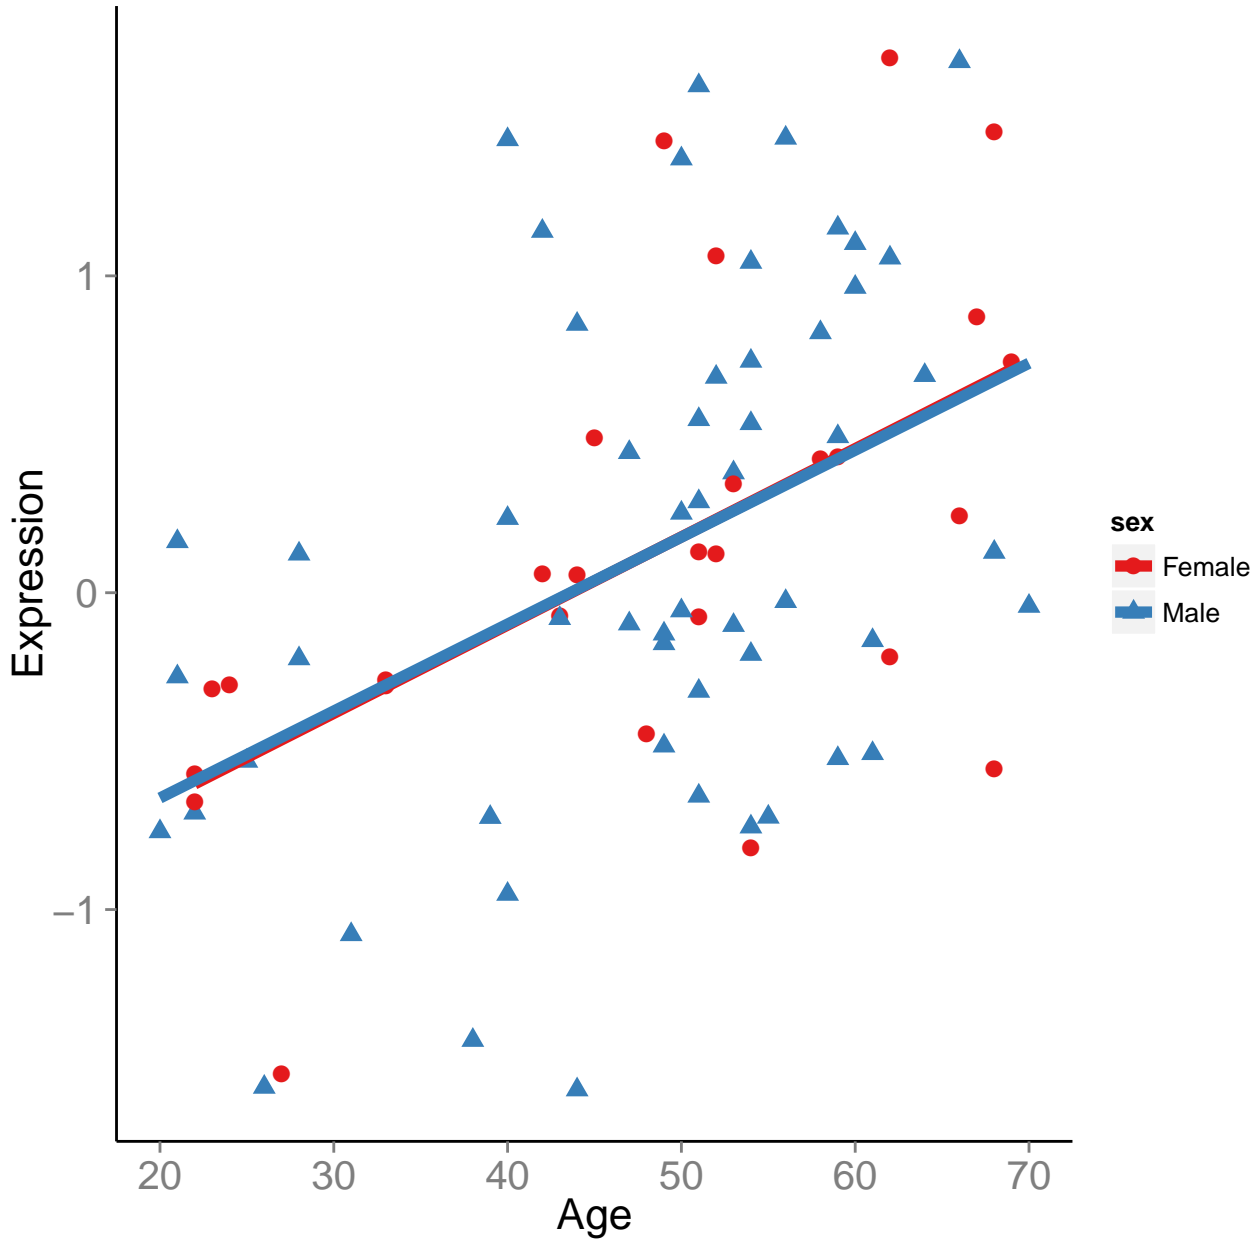

Heart: C9orf114 Pearson-R=0.48 Pval=4.88E-06

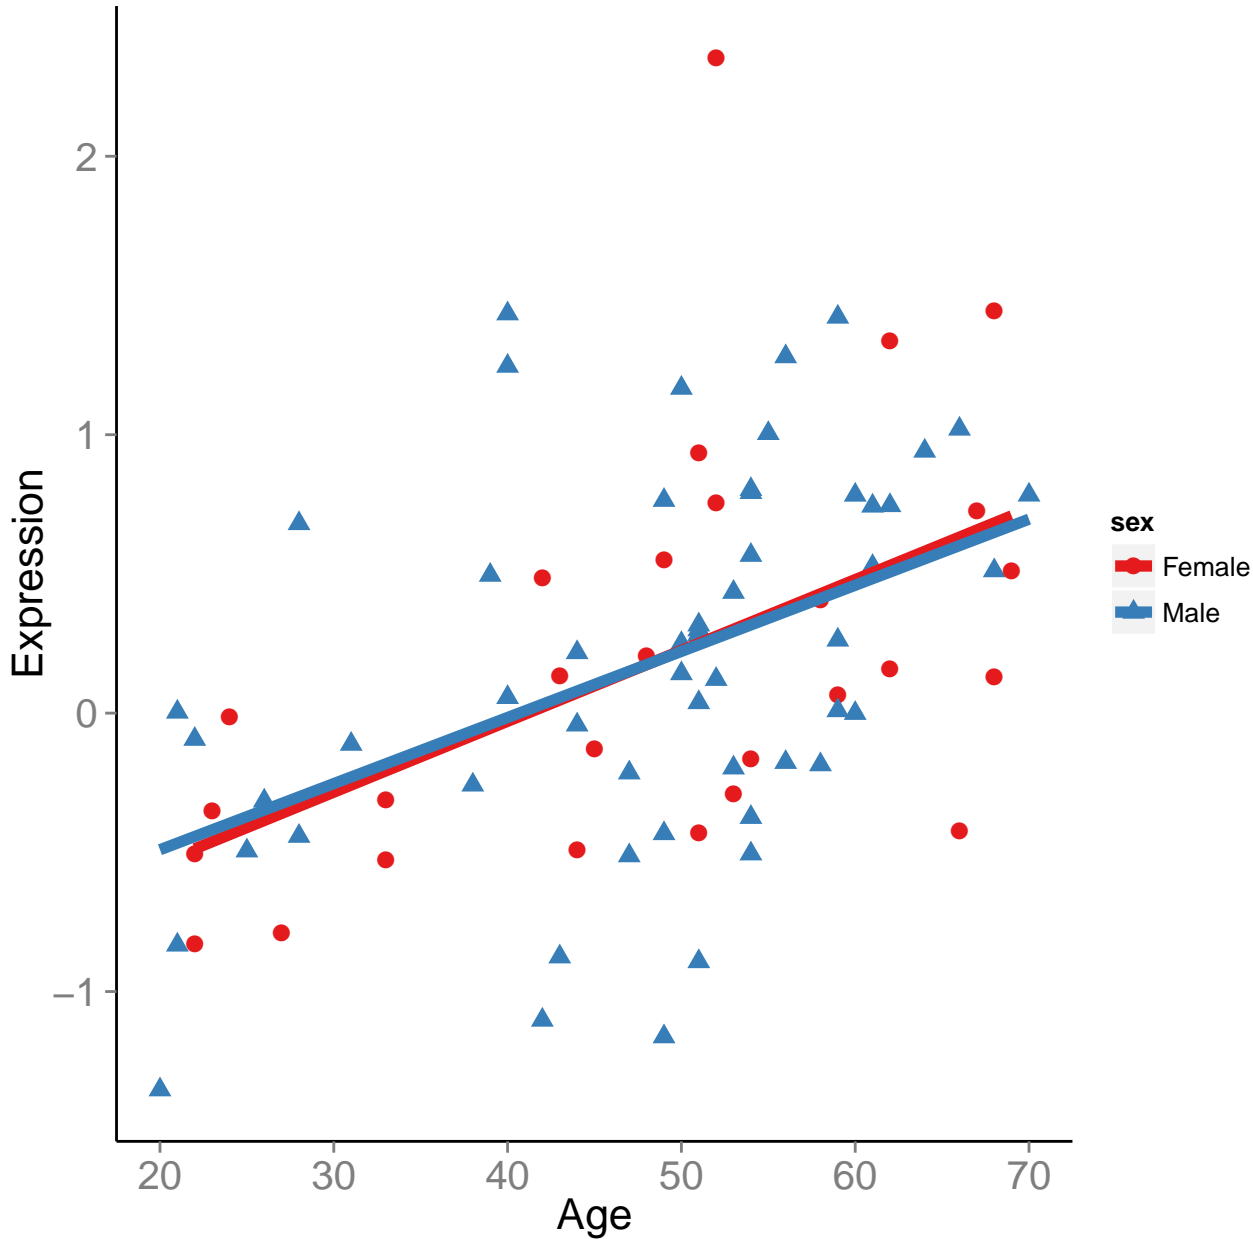

Heart: CDK19 Pearson-R=0.48 Pval=5.43E-06

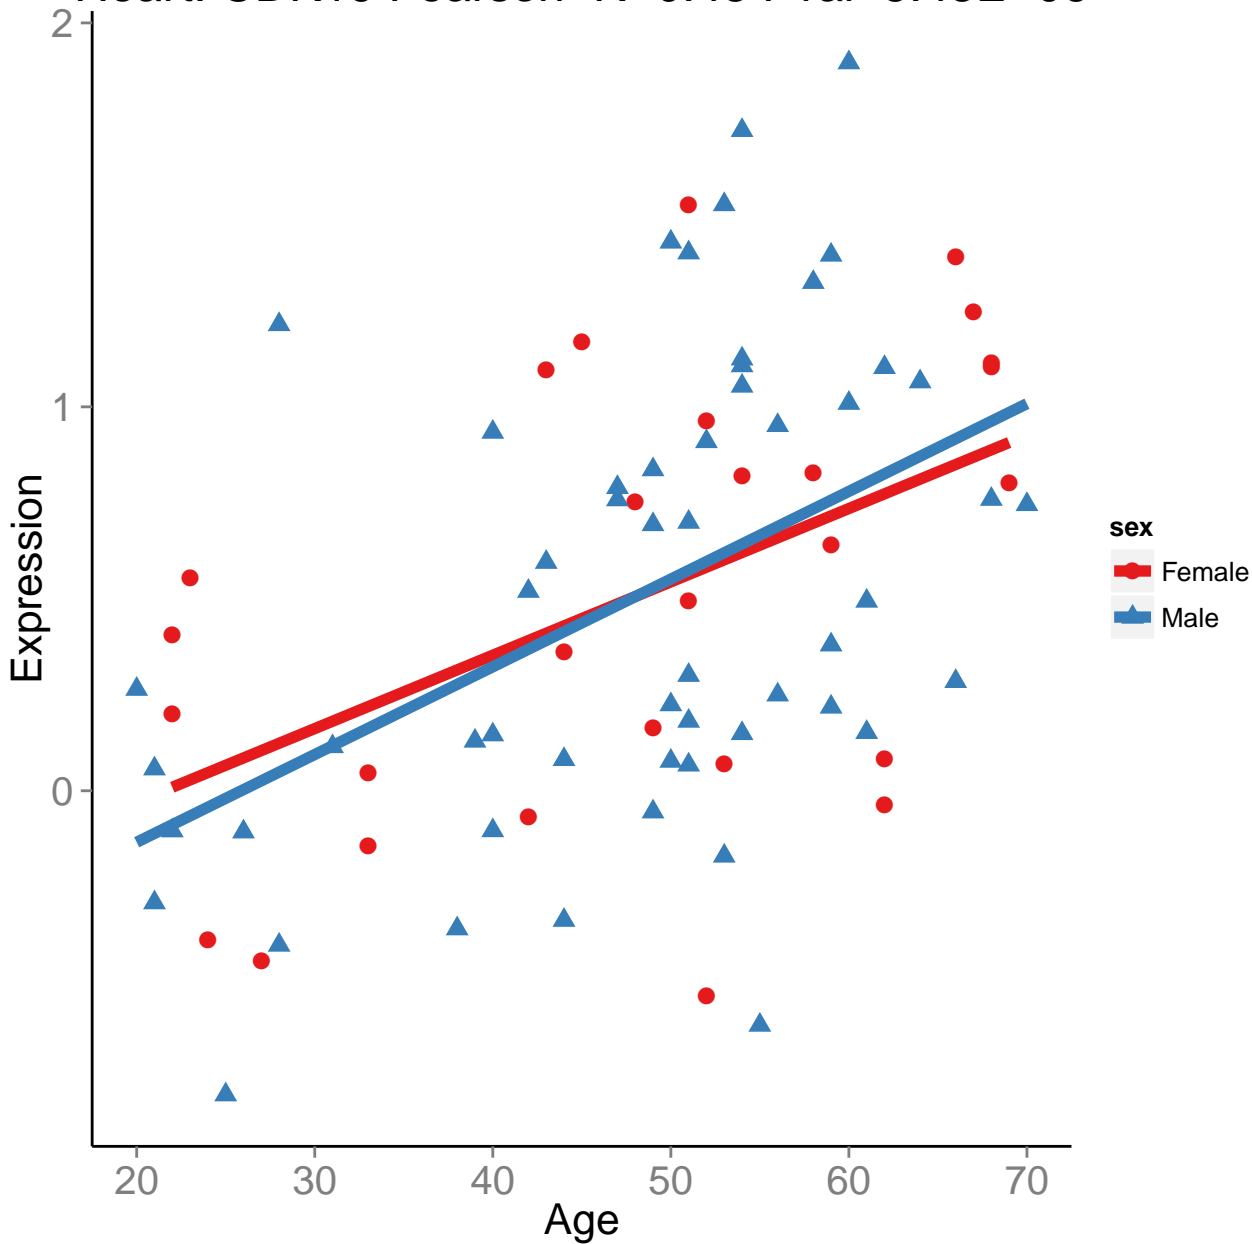

Heart: NR1H3 Pearson-R=0.48 Pval=5.64E-06

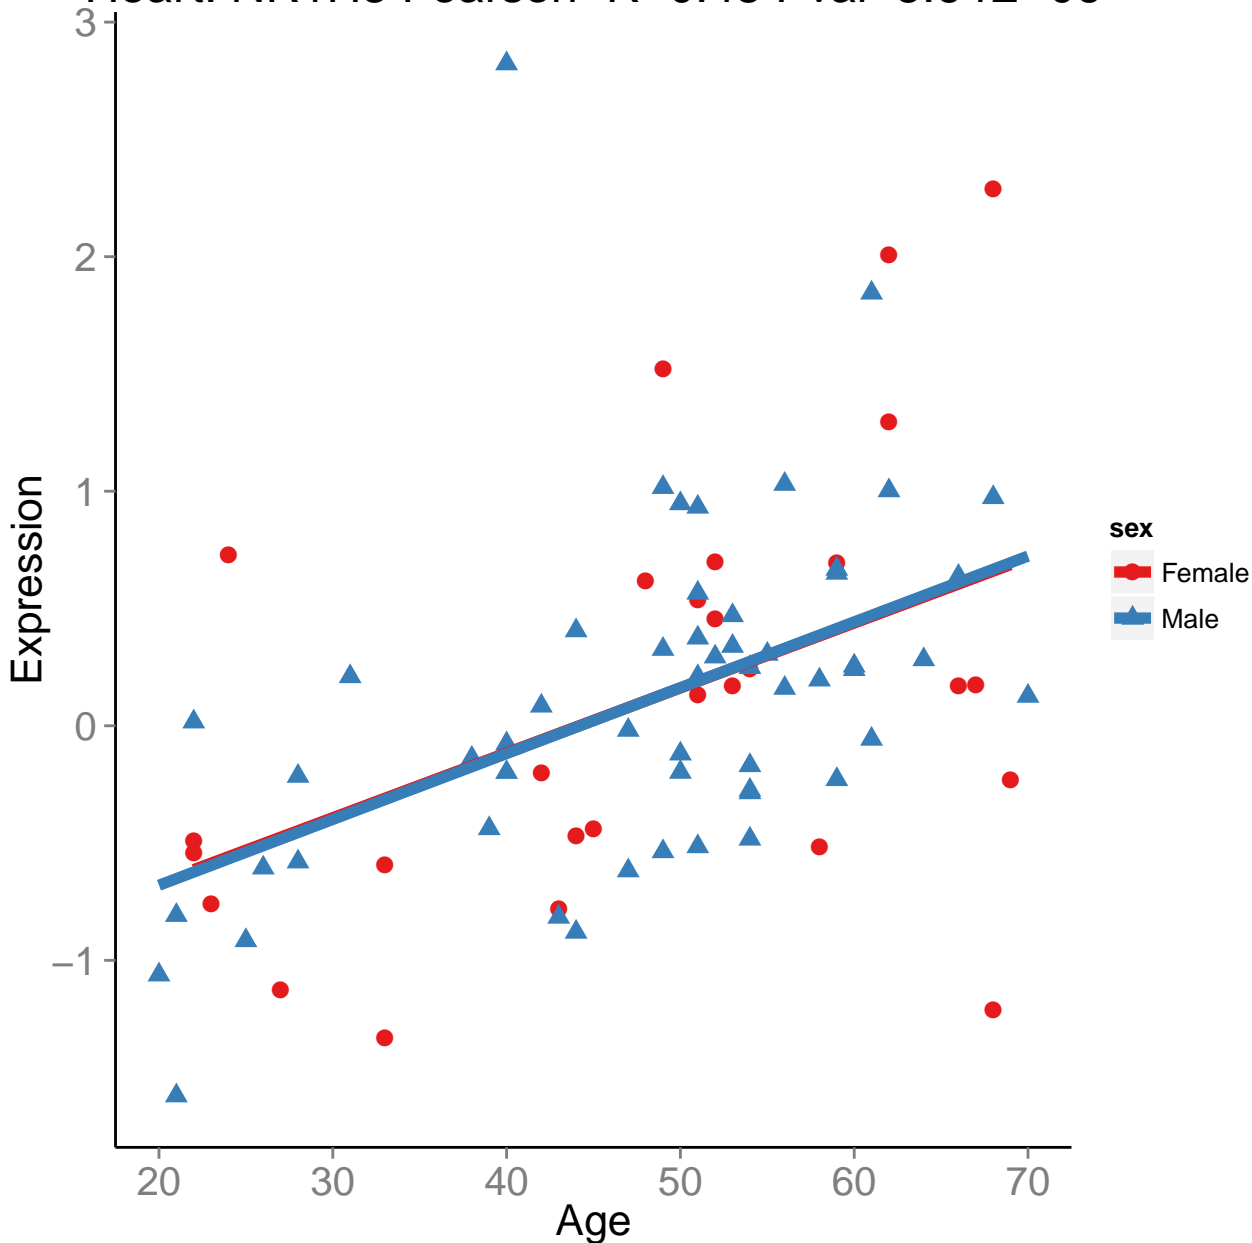

Heart: UQCRFS1 Pearson-R=-0.48 Pval=5.64E-06

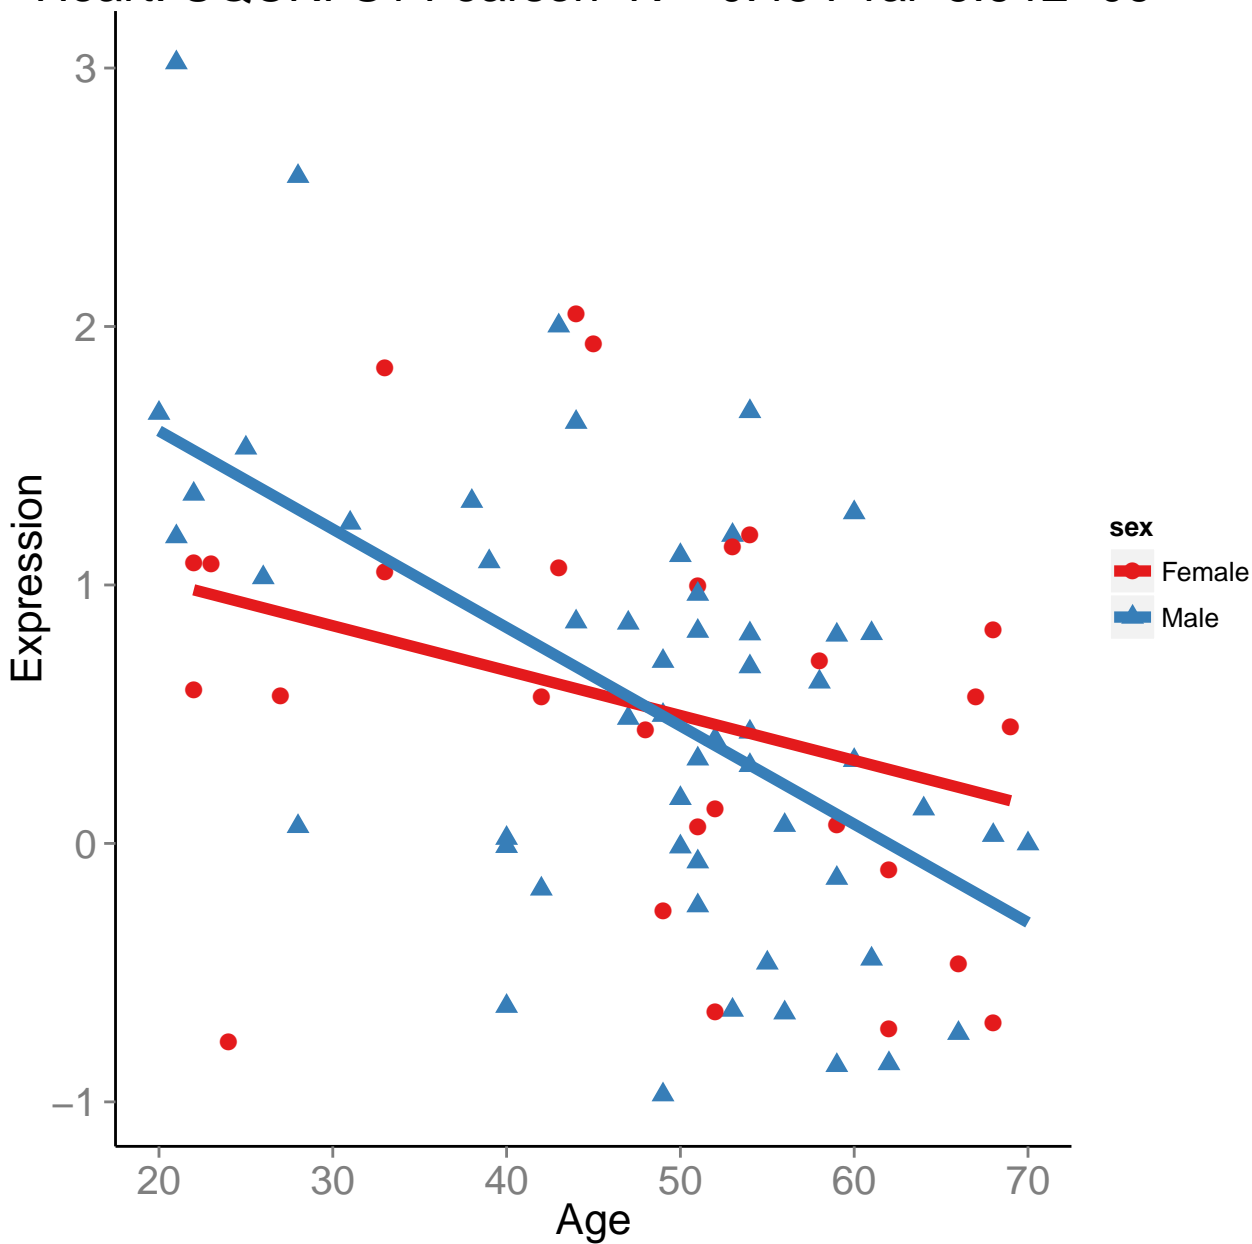

Heart: AEN Pearson-R=0.48 Pval=5.44E-06

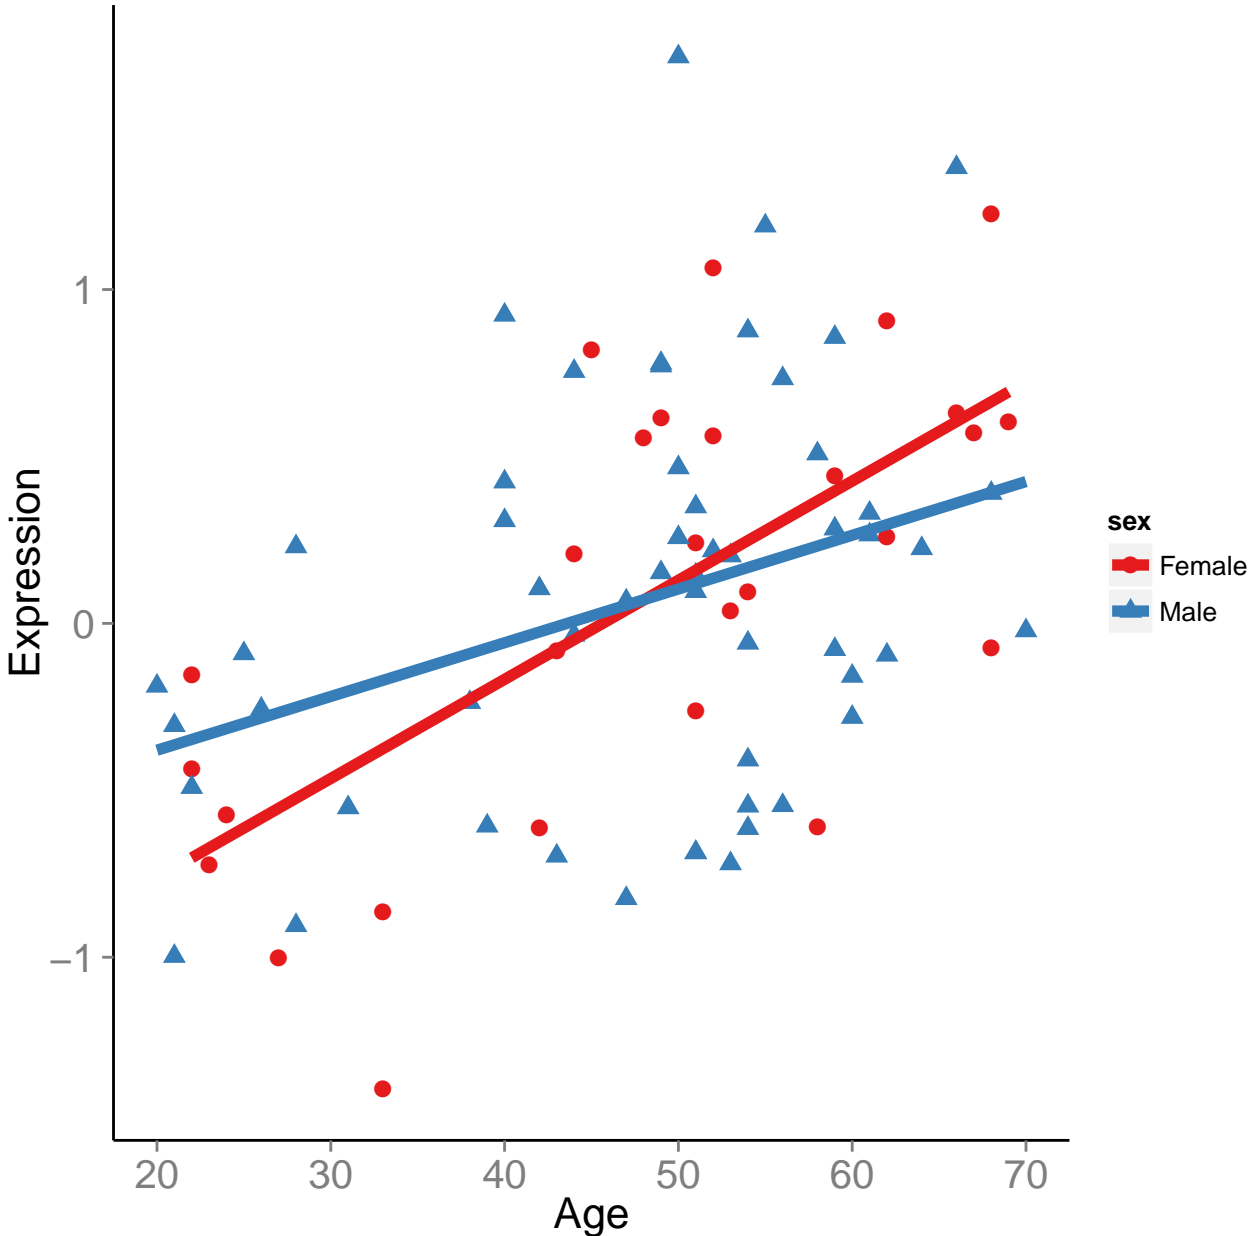



Heart: MALSU1 Pearson-R=-0.48 Pval=5.50E-06

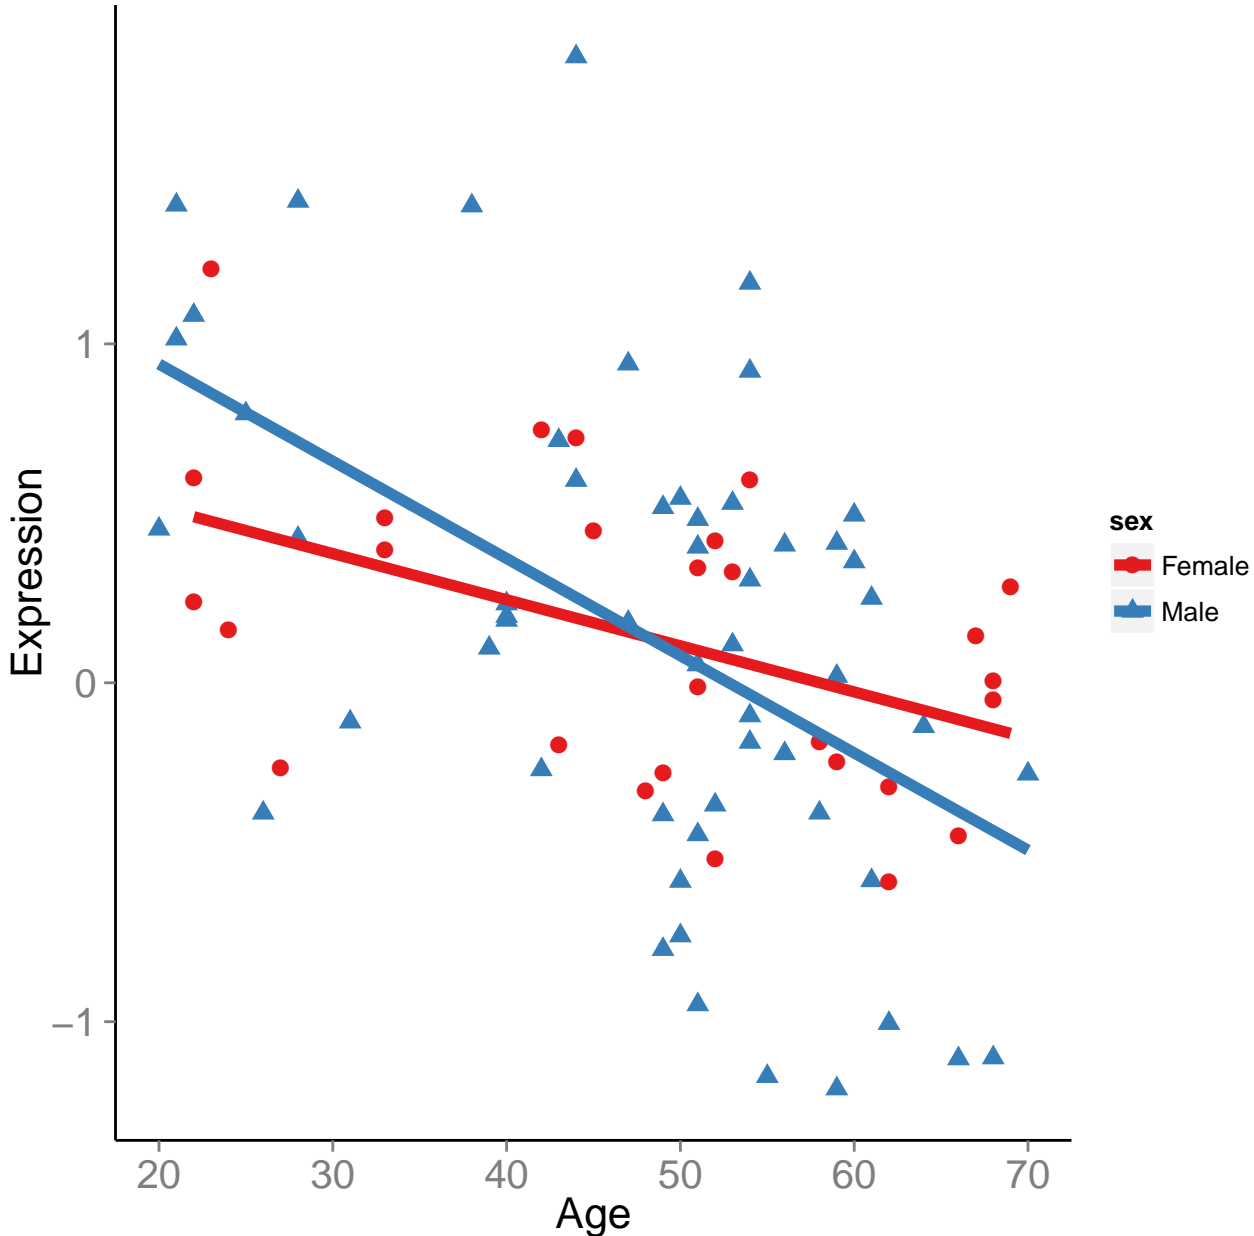

Heart: AC068831.15 Pearson-R=0.48 Pval=5.61E-06

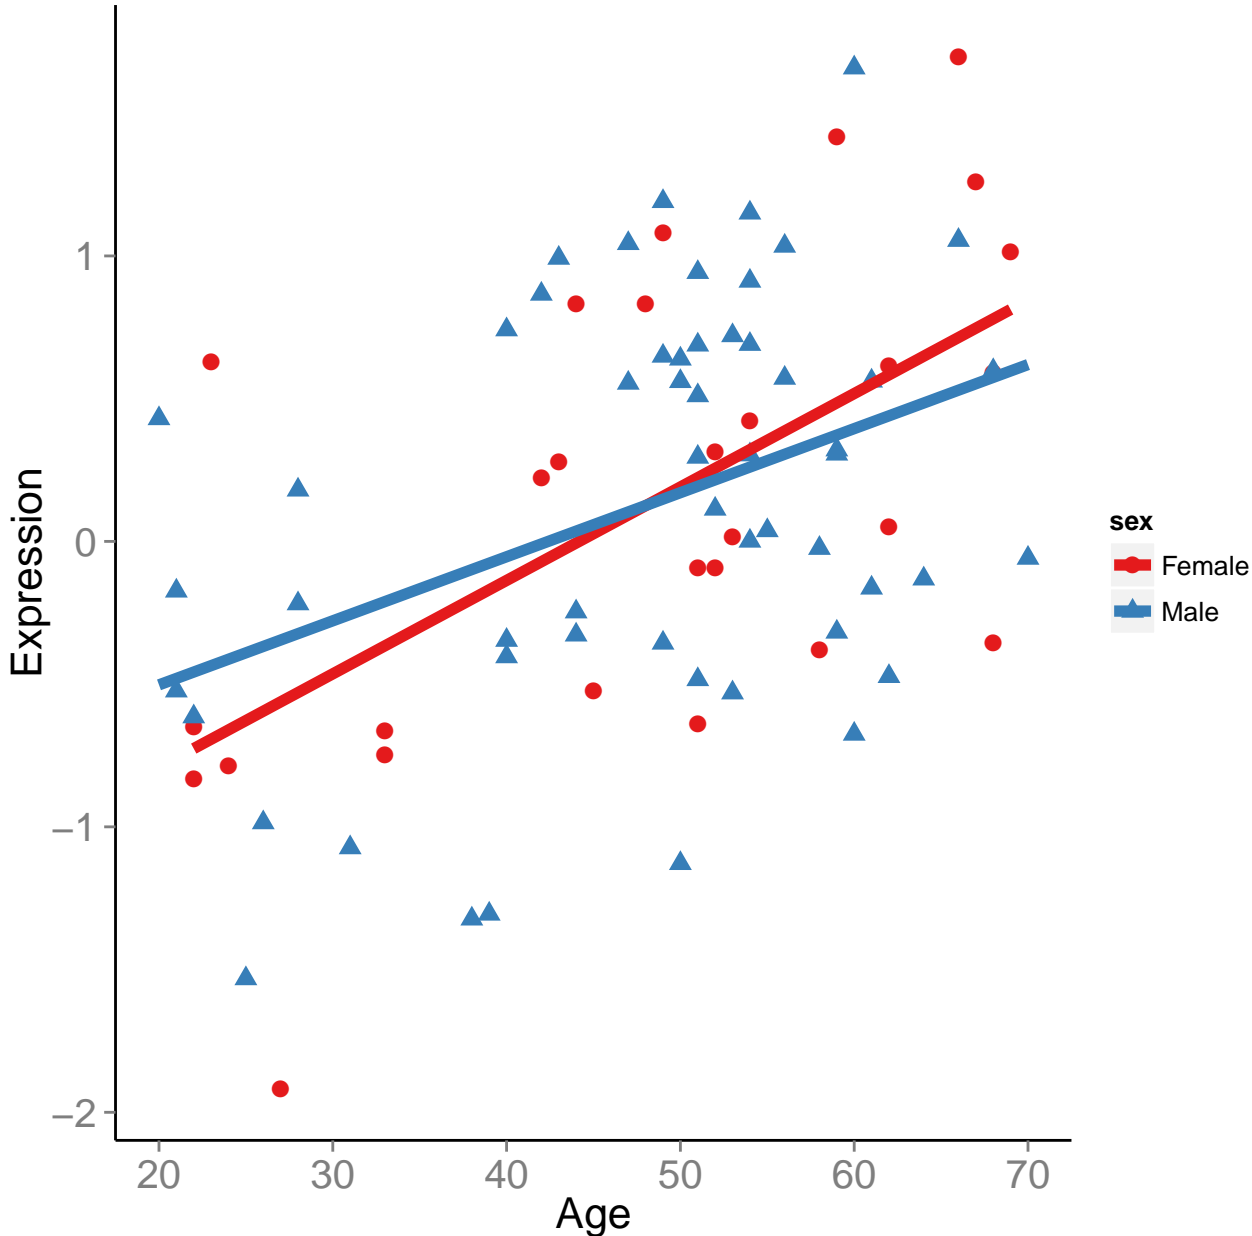

Heart: MRPL47 Pearson-R=-0.48 Pval=5.56E-06

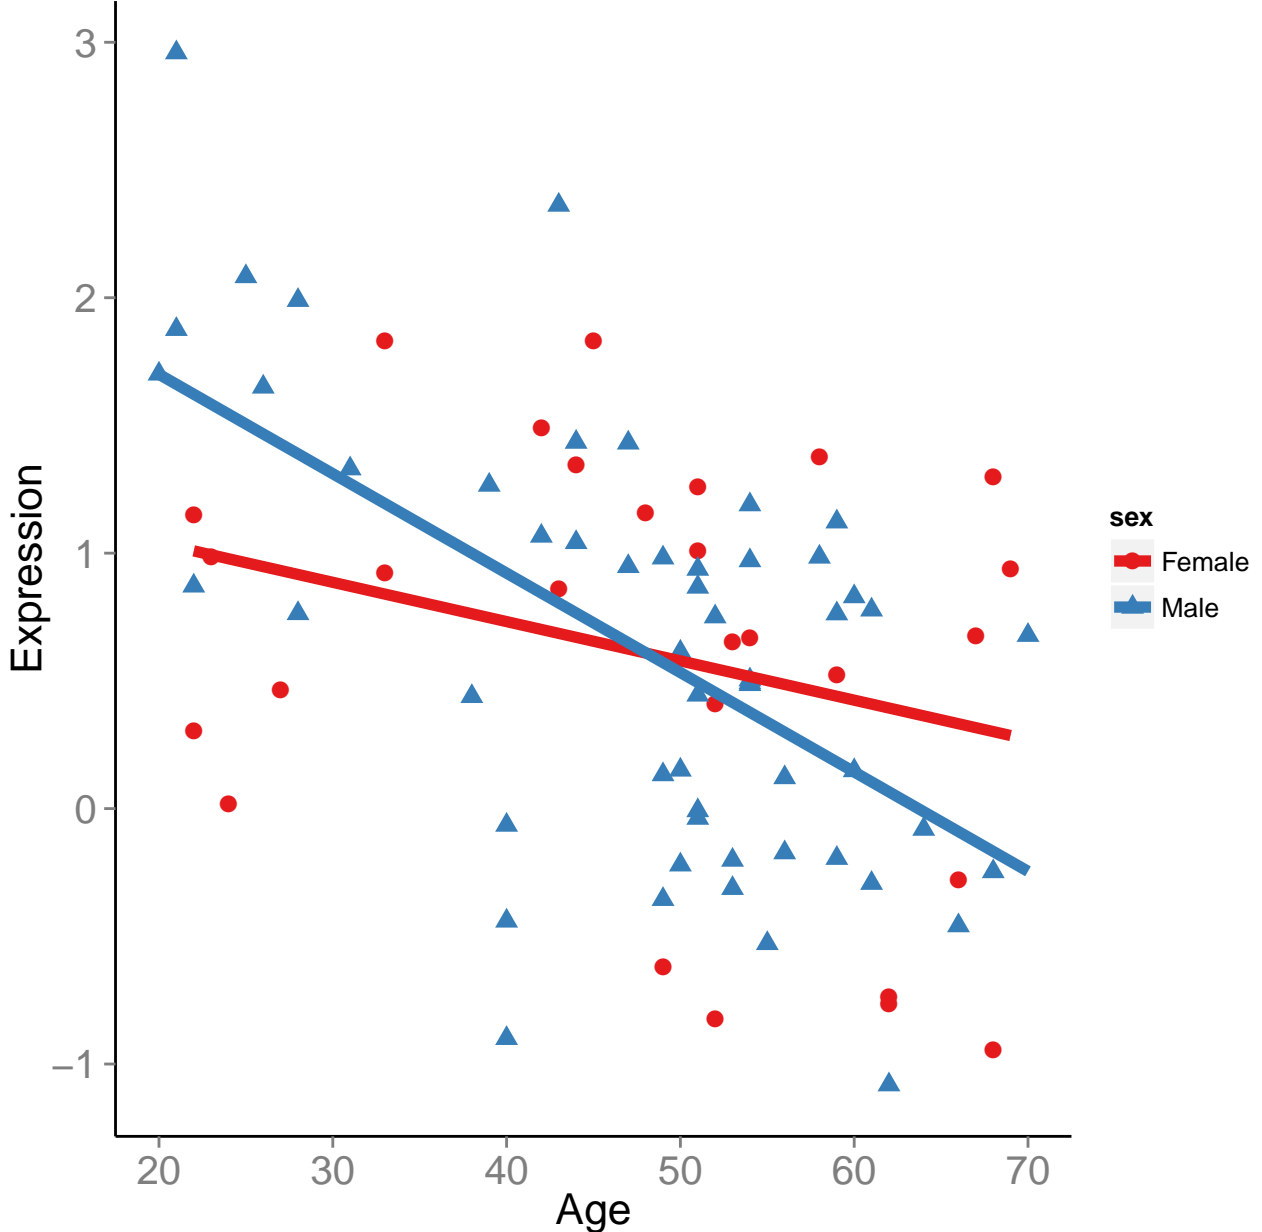

Heart: SUMF2 Pearson-R=0.48 Pval=5.32E-06

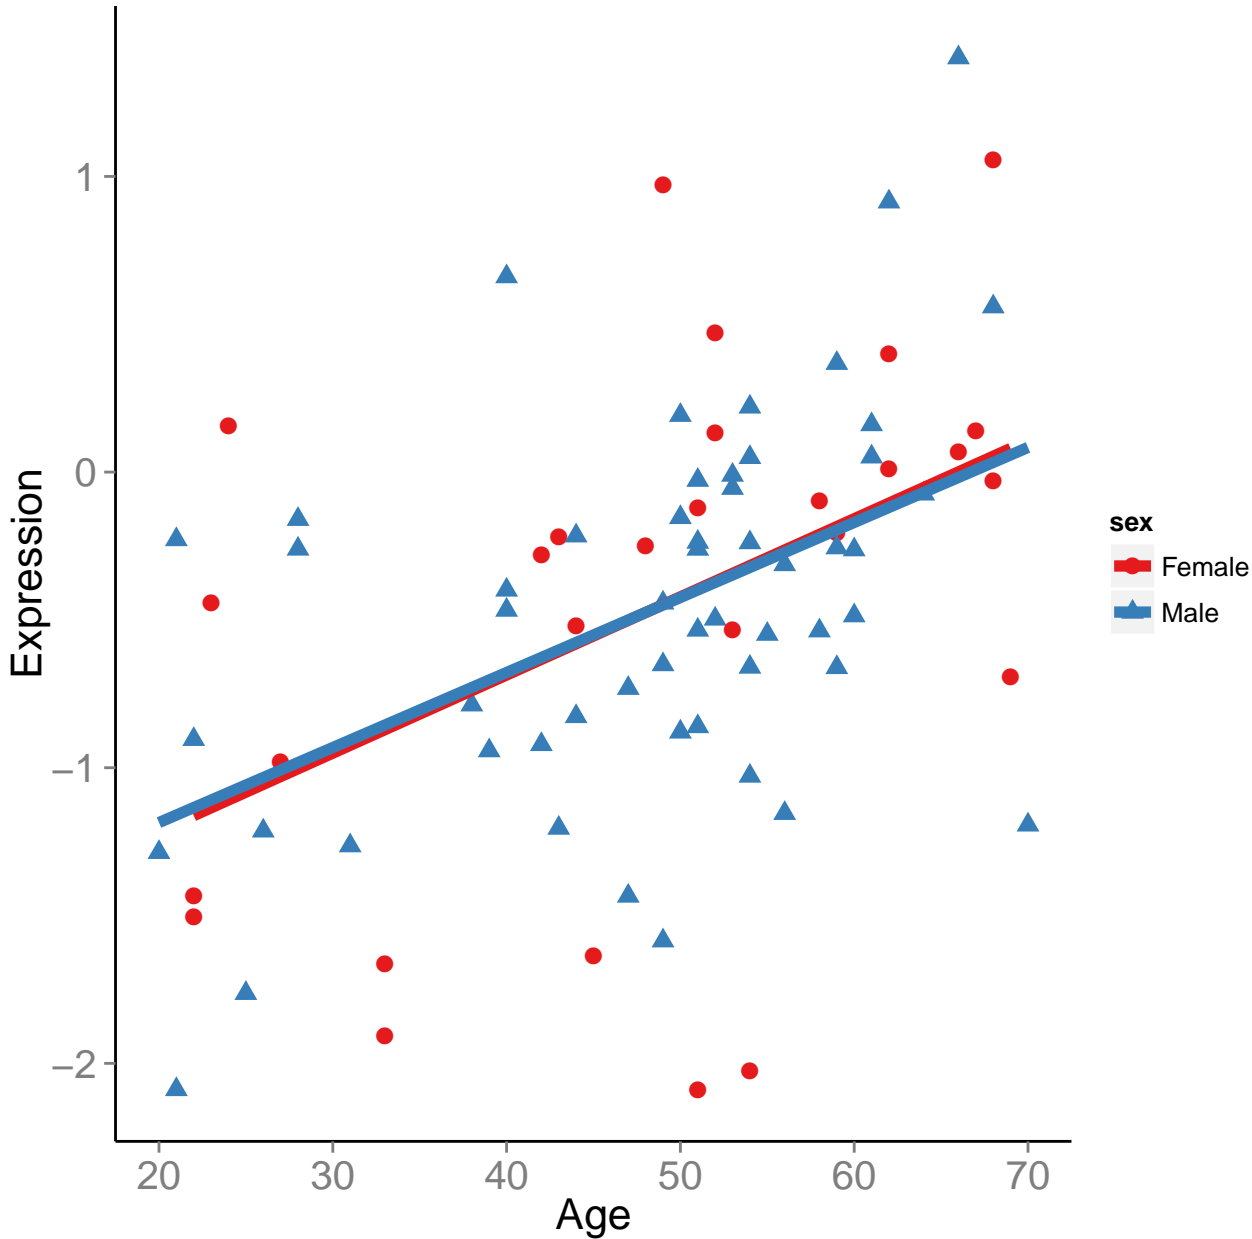

Heart: METAP2 Pearson-R=-0.48 Pval=5.40E-06

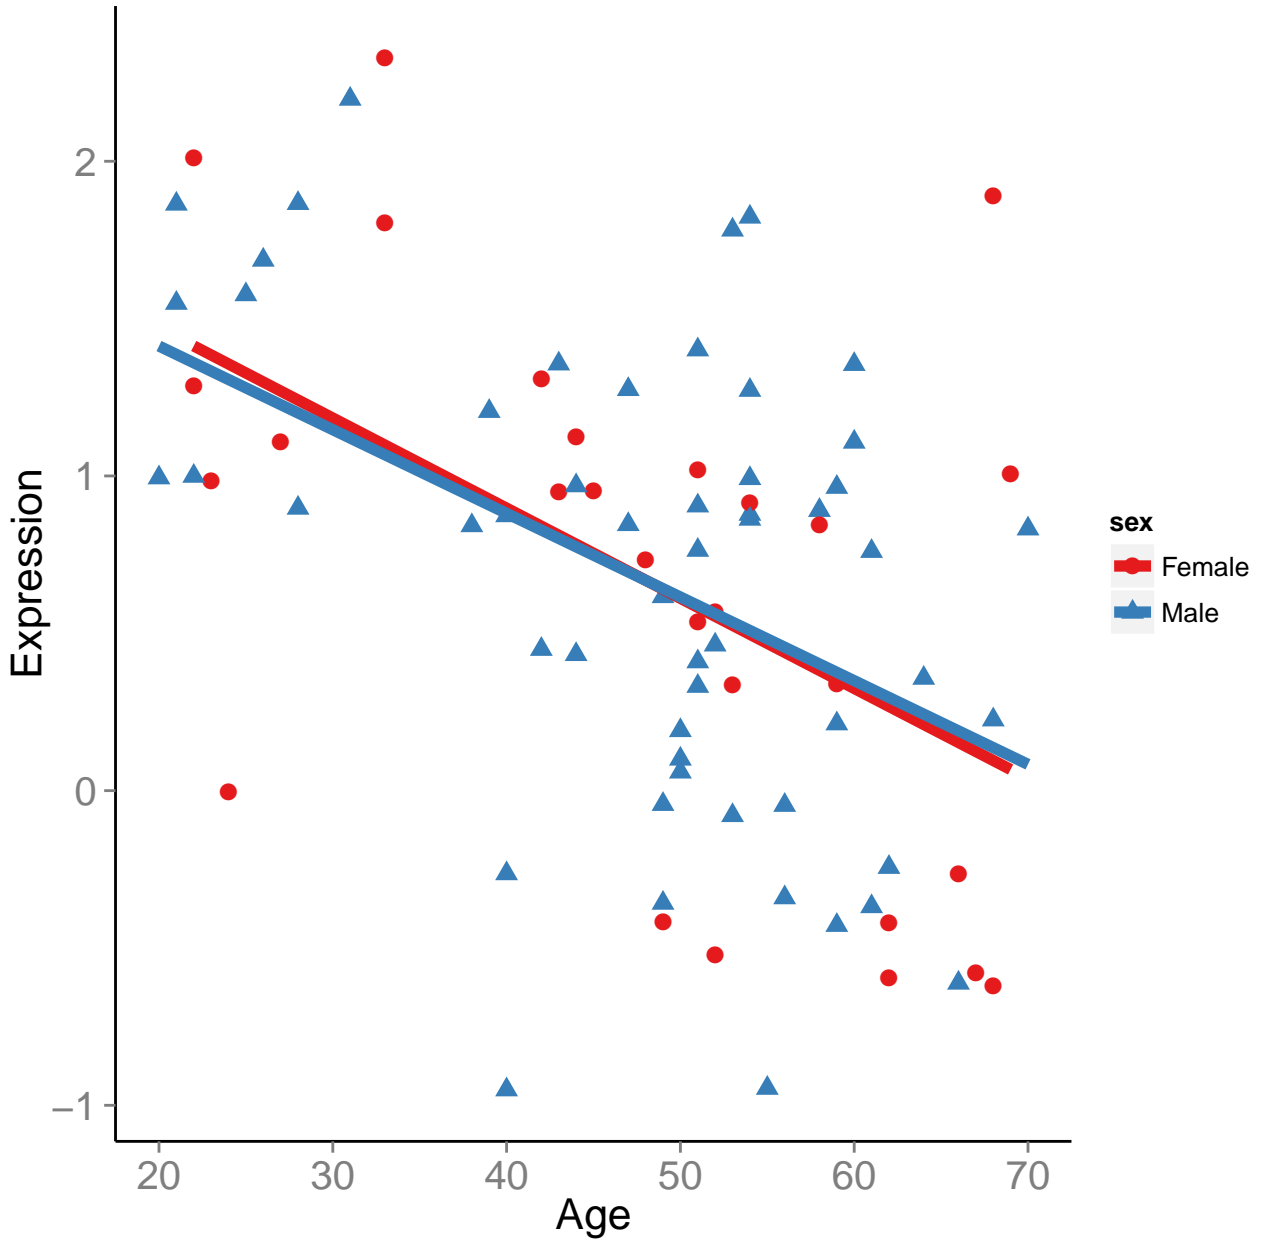

Heart: RP1-5O6.6 Pearson-R=0.48 Pval=5.37E-06

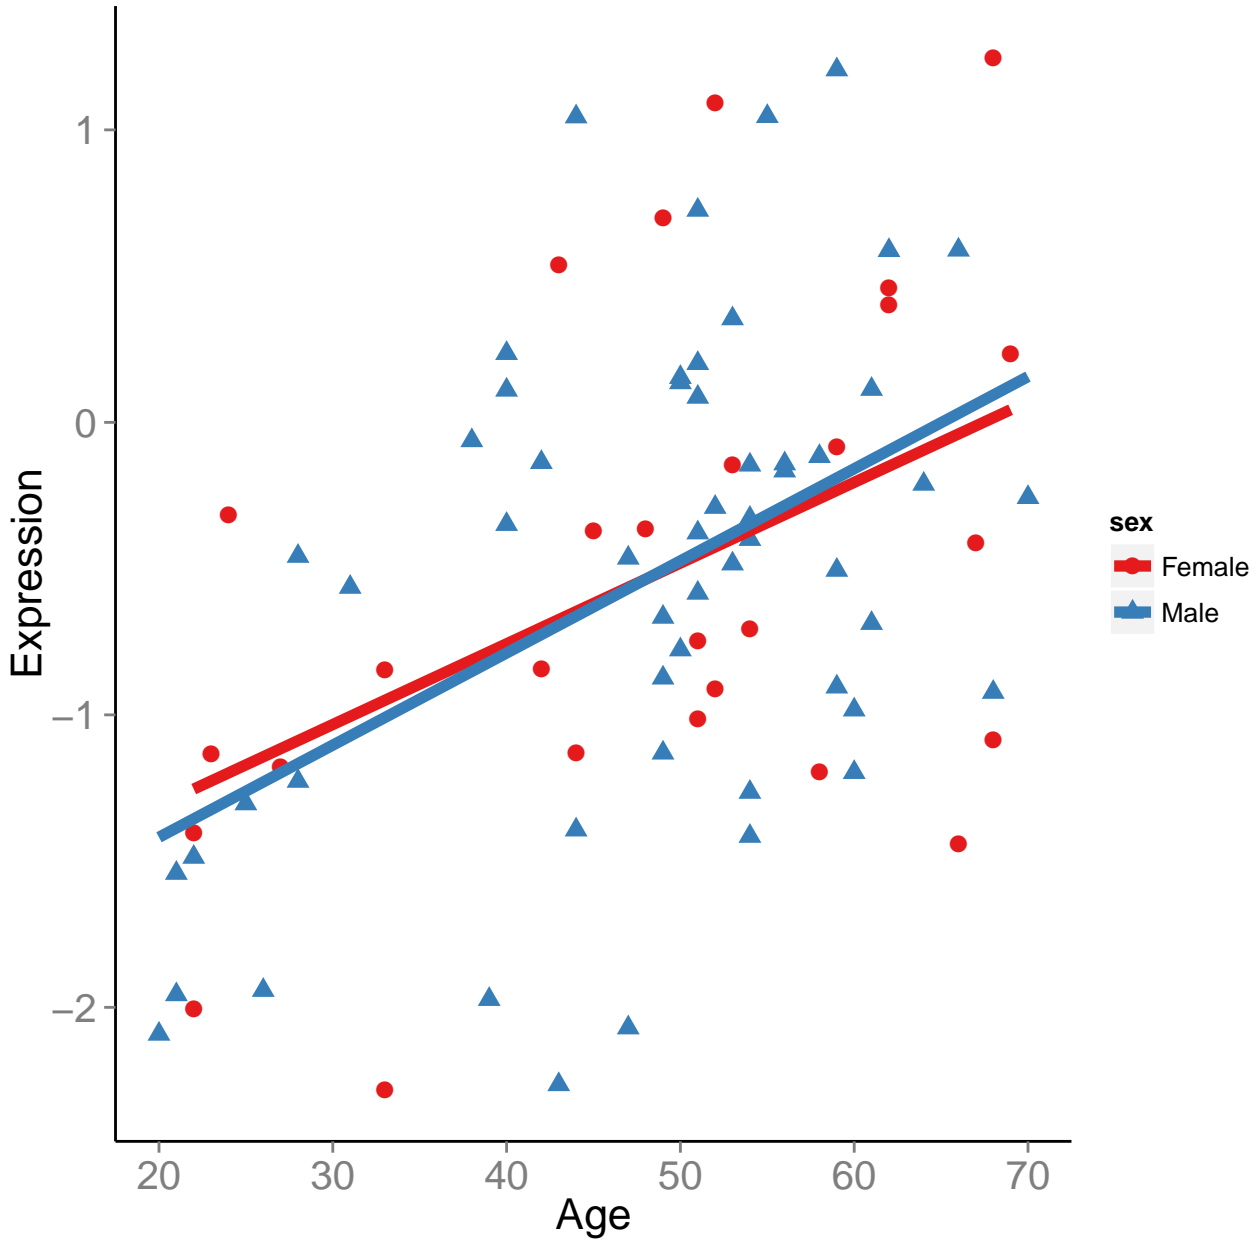

Heart: STC1 Pearson-R=0.47 Pval=7.08E-06

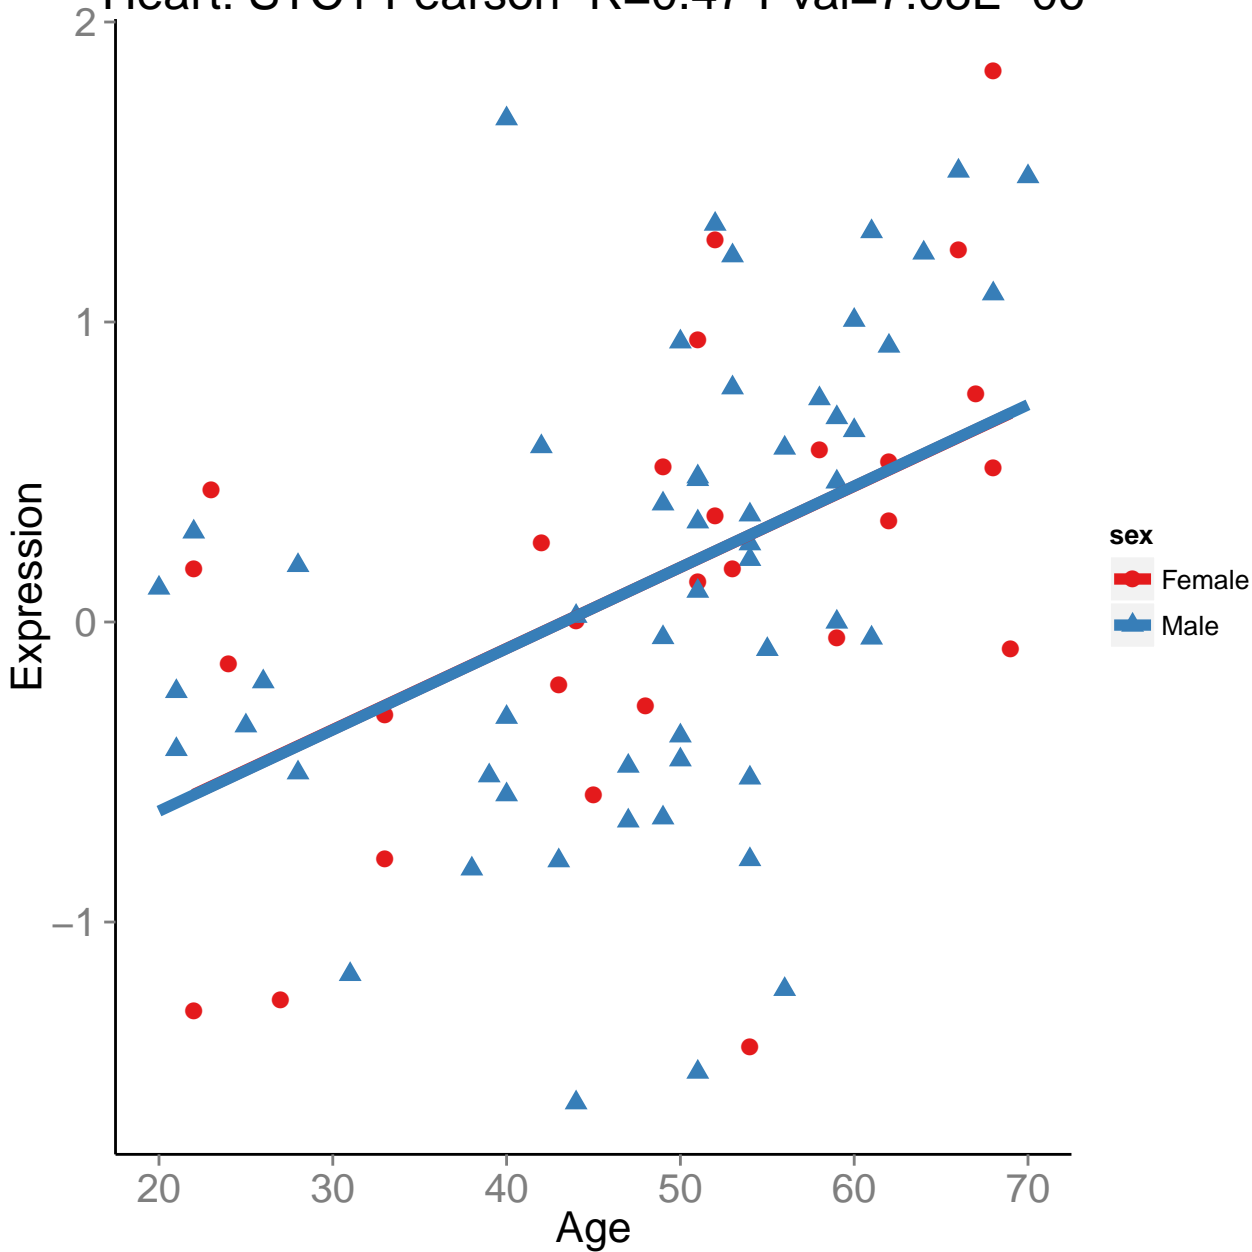

Heart: MYPN Pearson-R=-0.47 Pval=6.81E-06

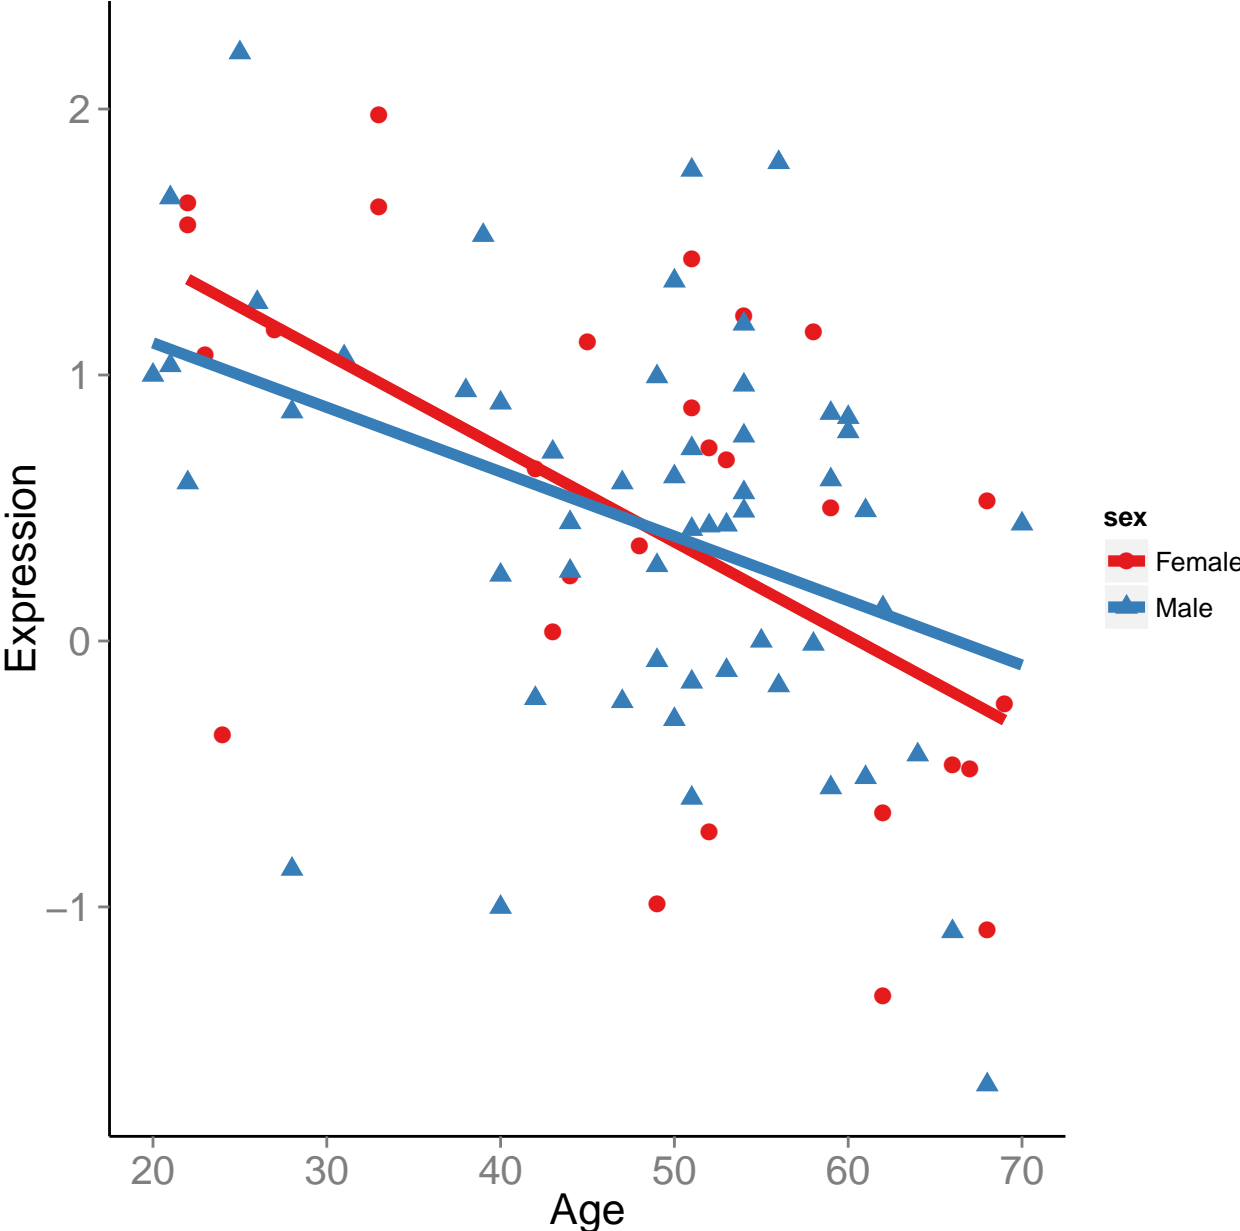



Heart: NPIPP1 Pearson-R=0.47 Pval=6.79E-06

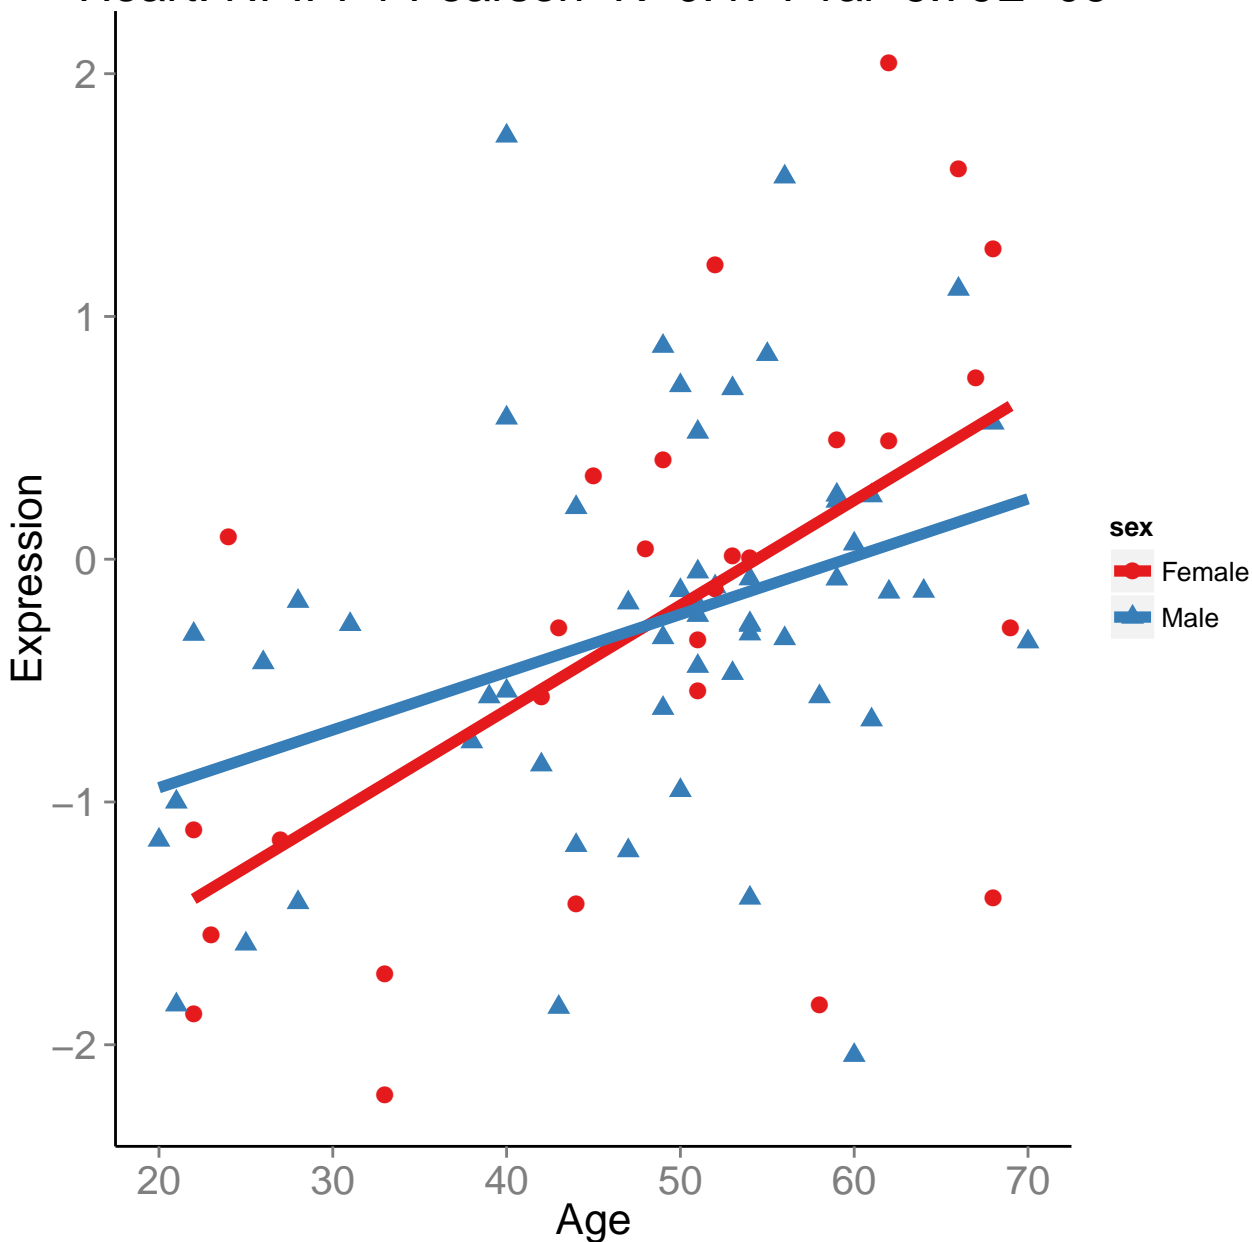

Heart: PRELP Pearson-R=0.47 Pval=7.29E-06

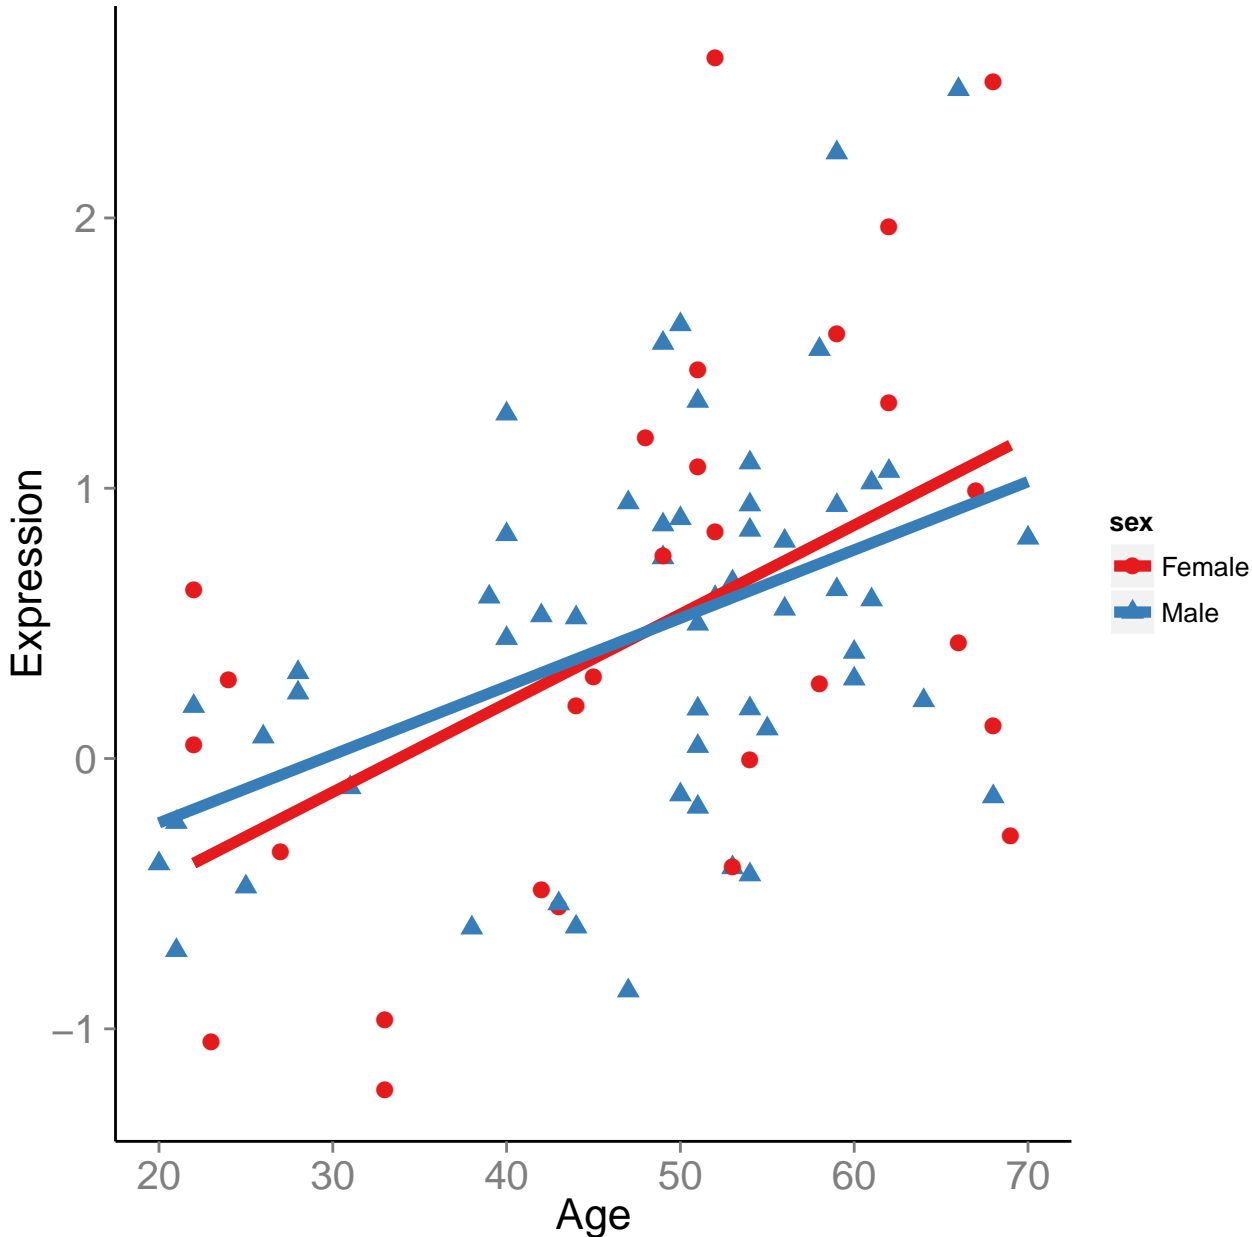

Heart: INHBB Pearson-R=0.47 Pval=6.38E-06

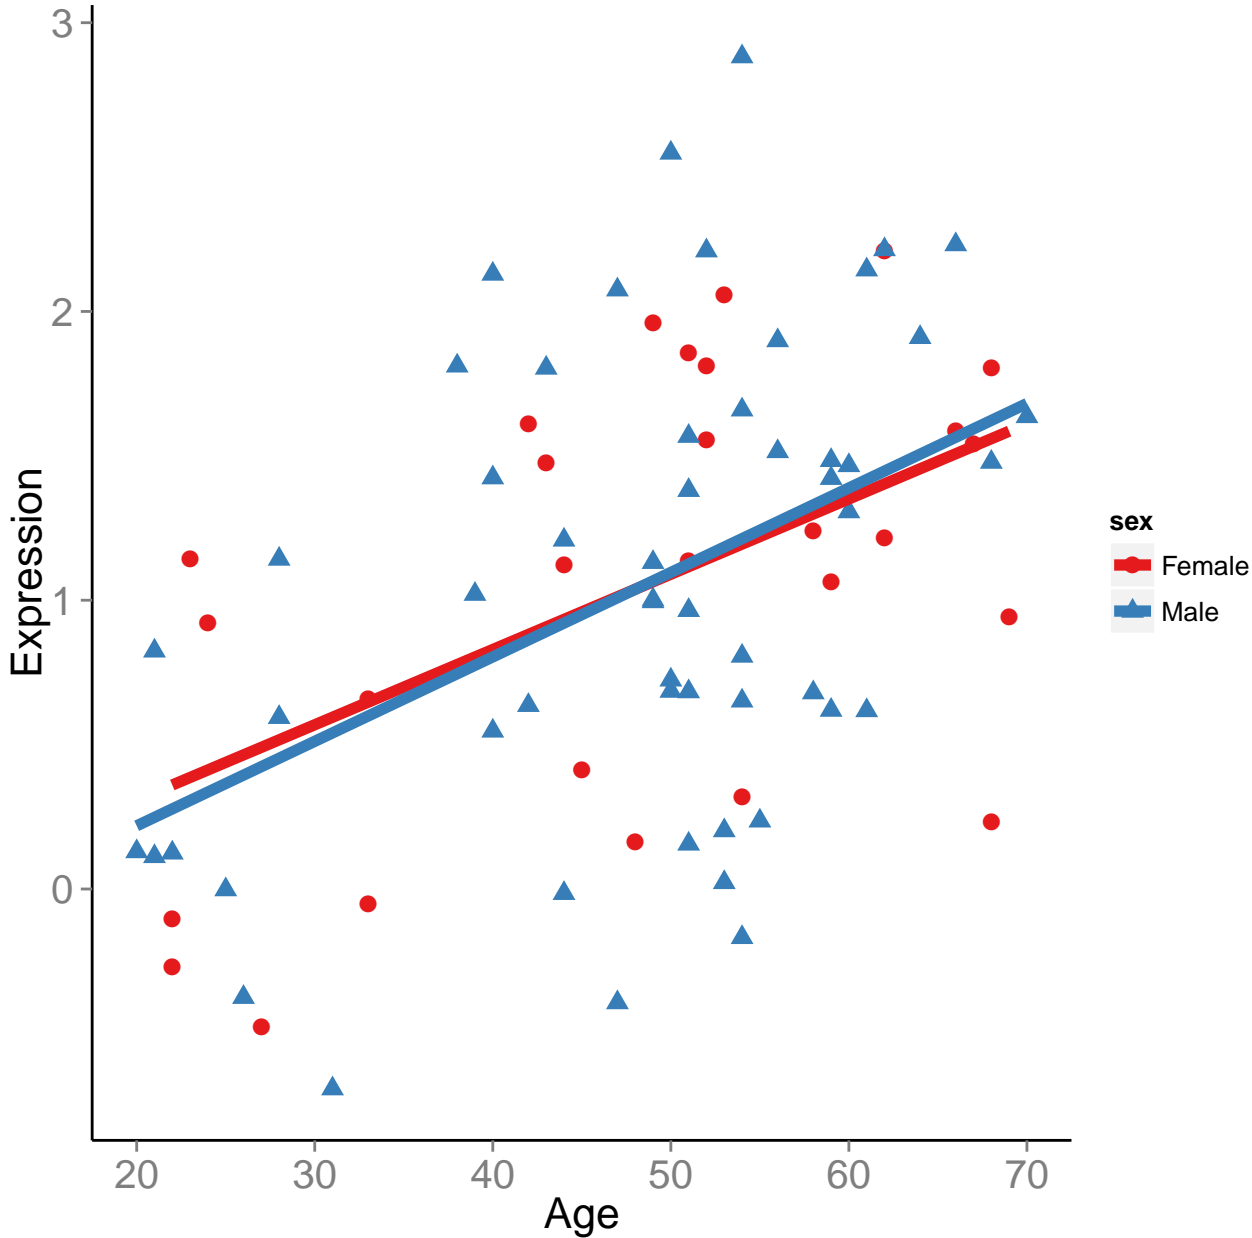

Heart: NUPR1 Pearson-R=0.47 Pval=7.77E-06

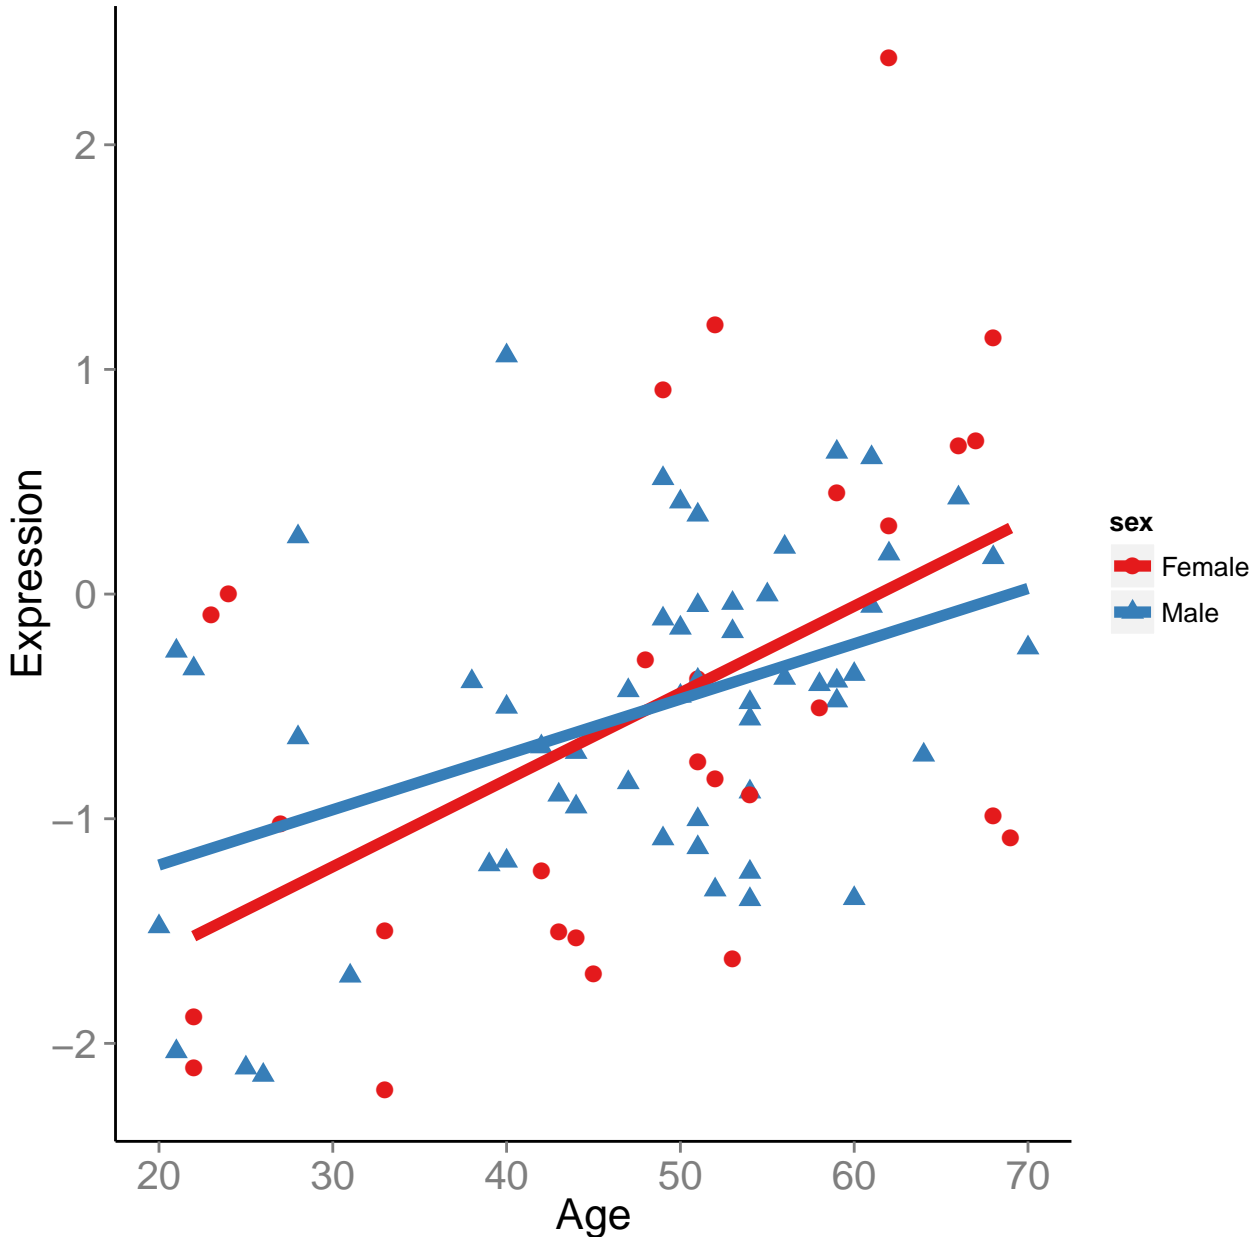

Heart: CCND3 Pearson-R=0.47 Pval=6.47E-06

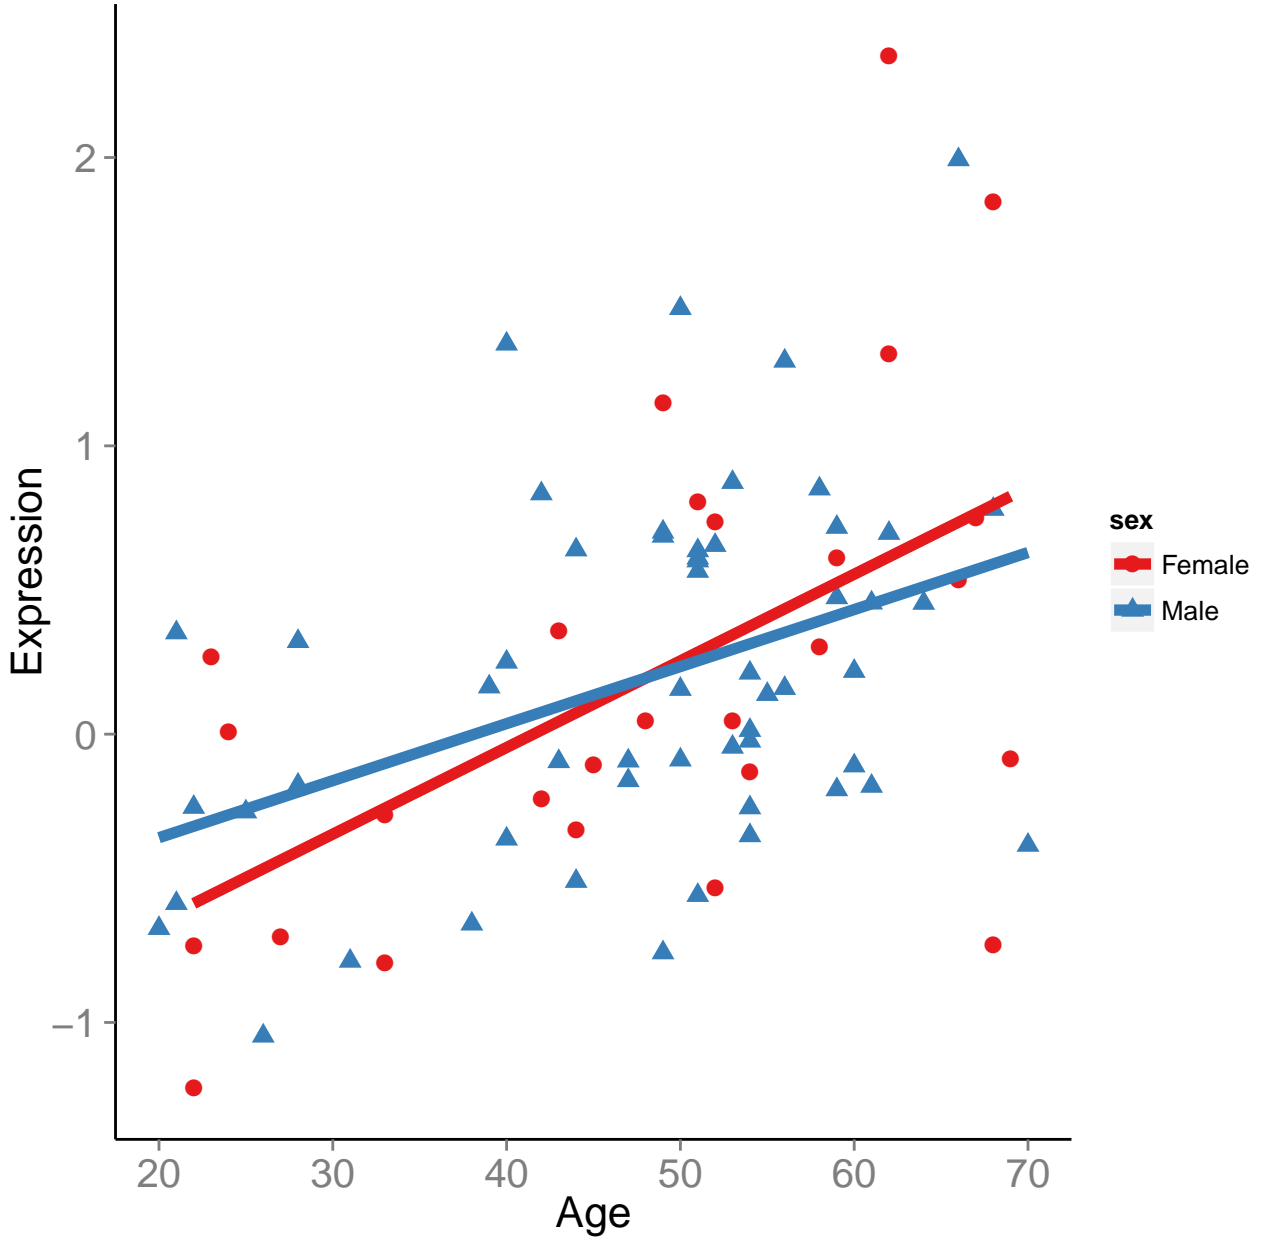

Heart: PER1 Pearson-R=0.47 Pval=7.74E-06

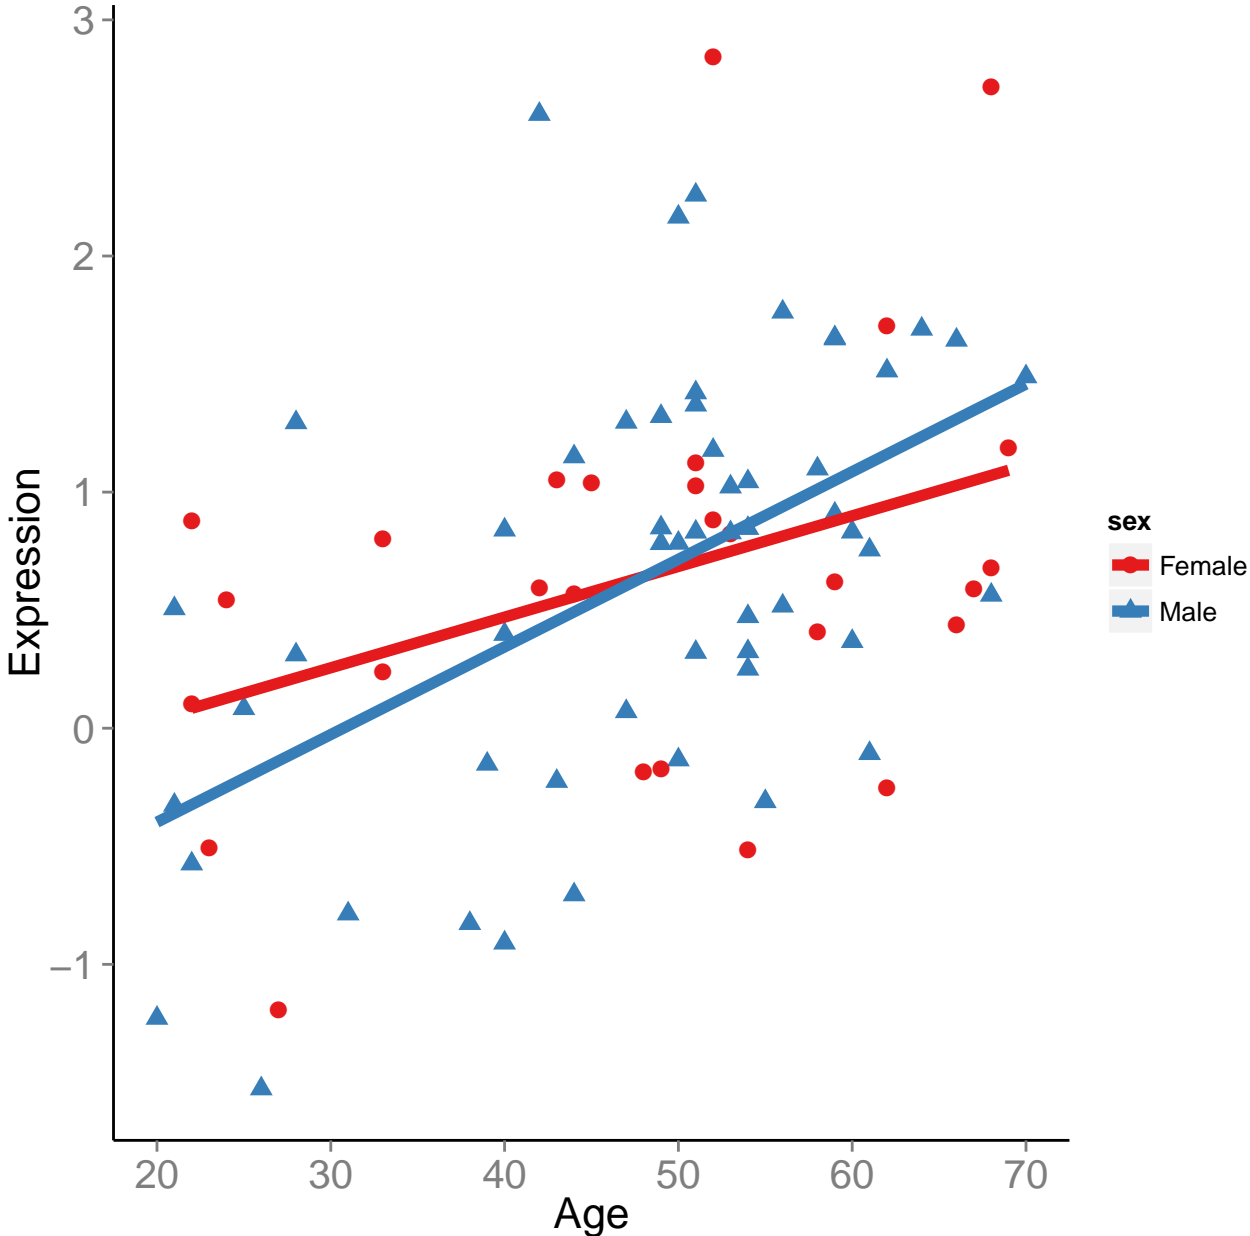

Heart: FGF1 Pearson-R=-0.47 Pval=7.57E-06

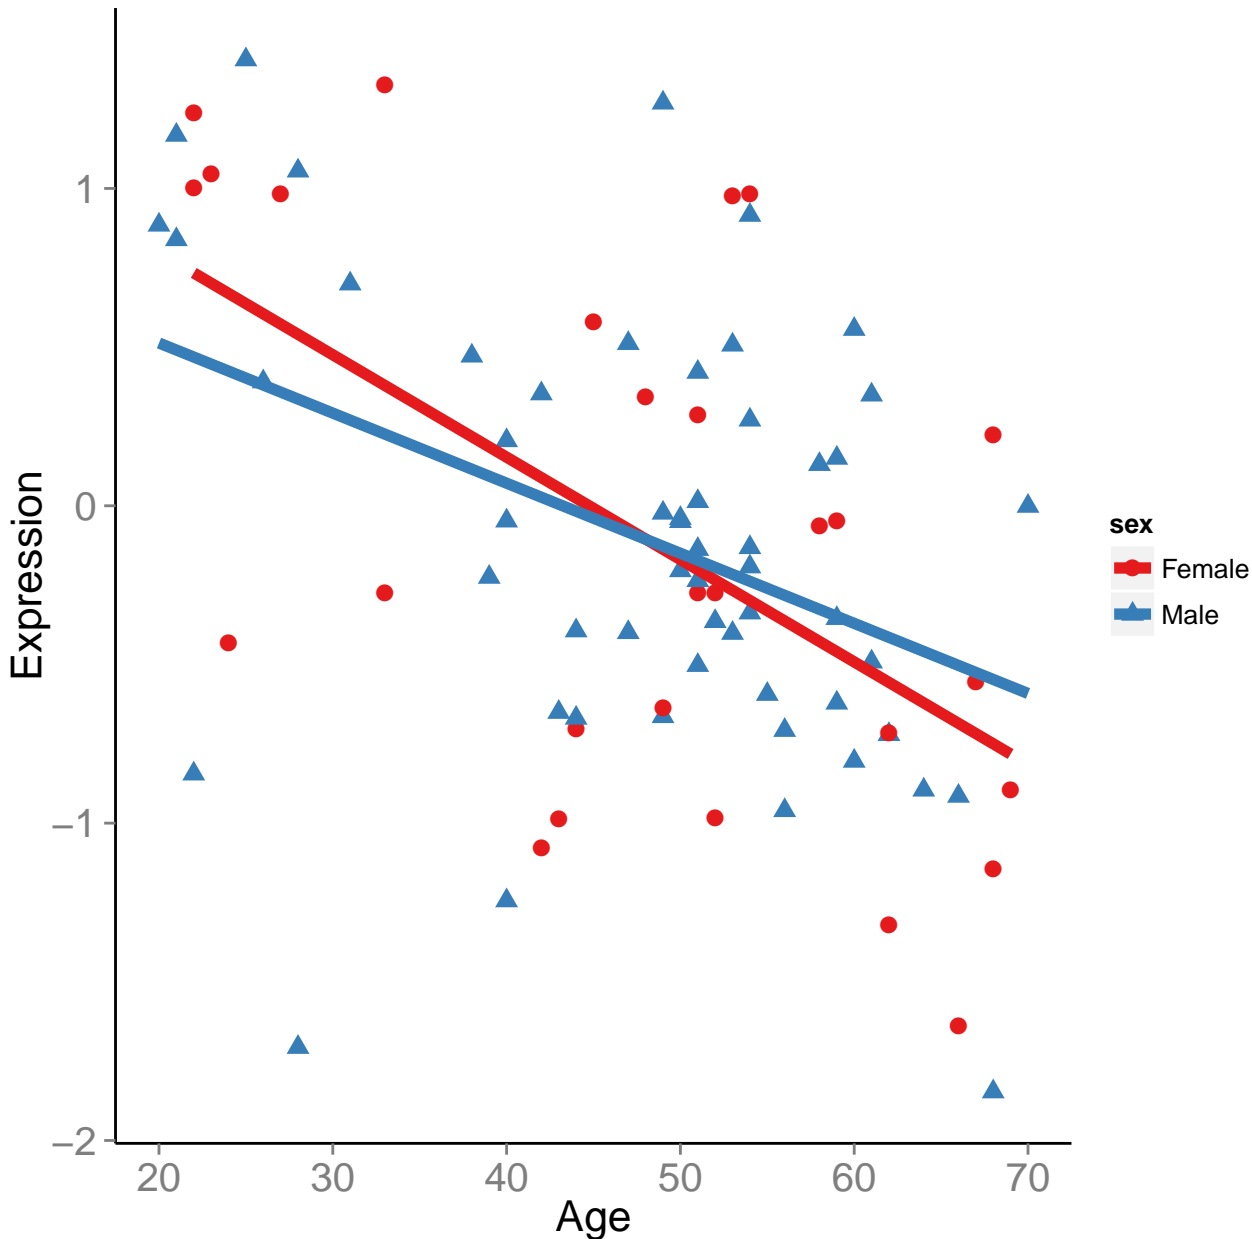

Heart: PSMG1 Pearson-R=-0.47 Pval=6.72E-06

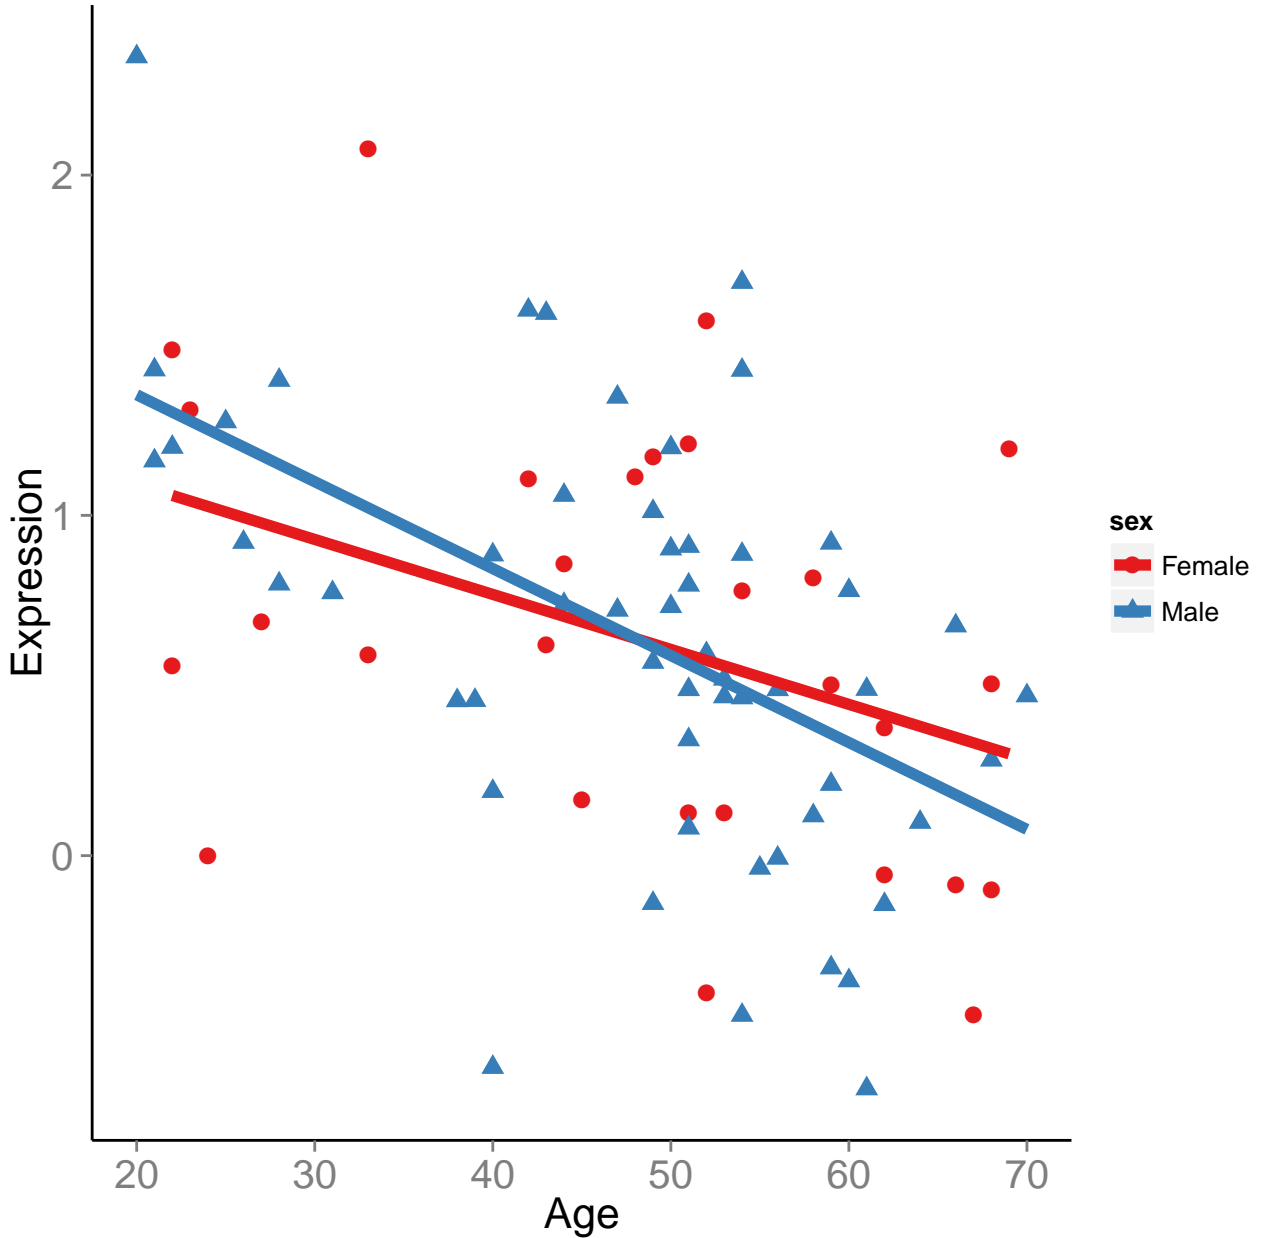



Heart: INTS3 Pearson-R=0.47 Pval=6.97E-06

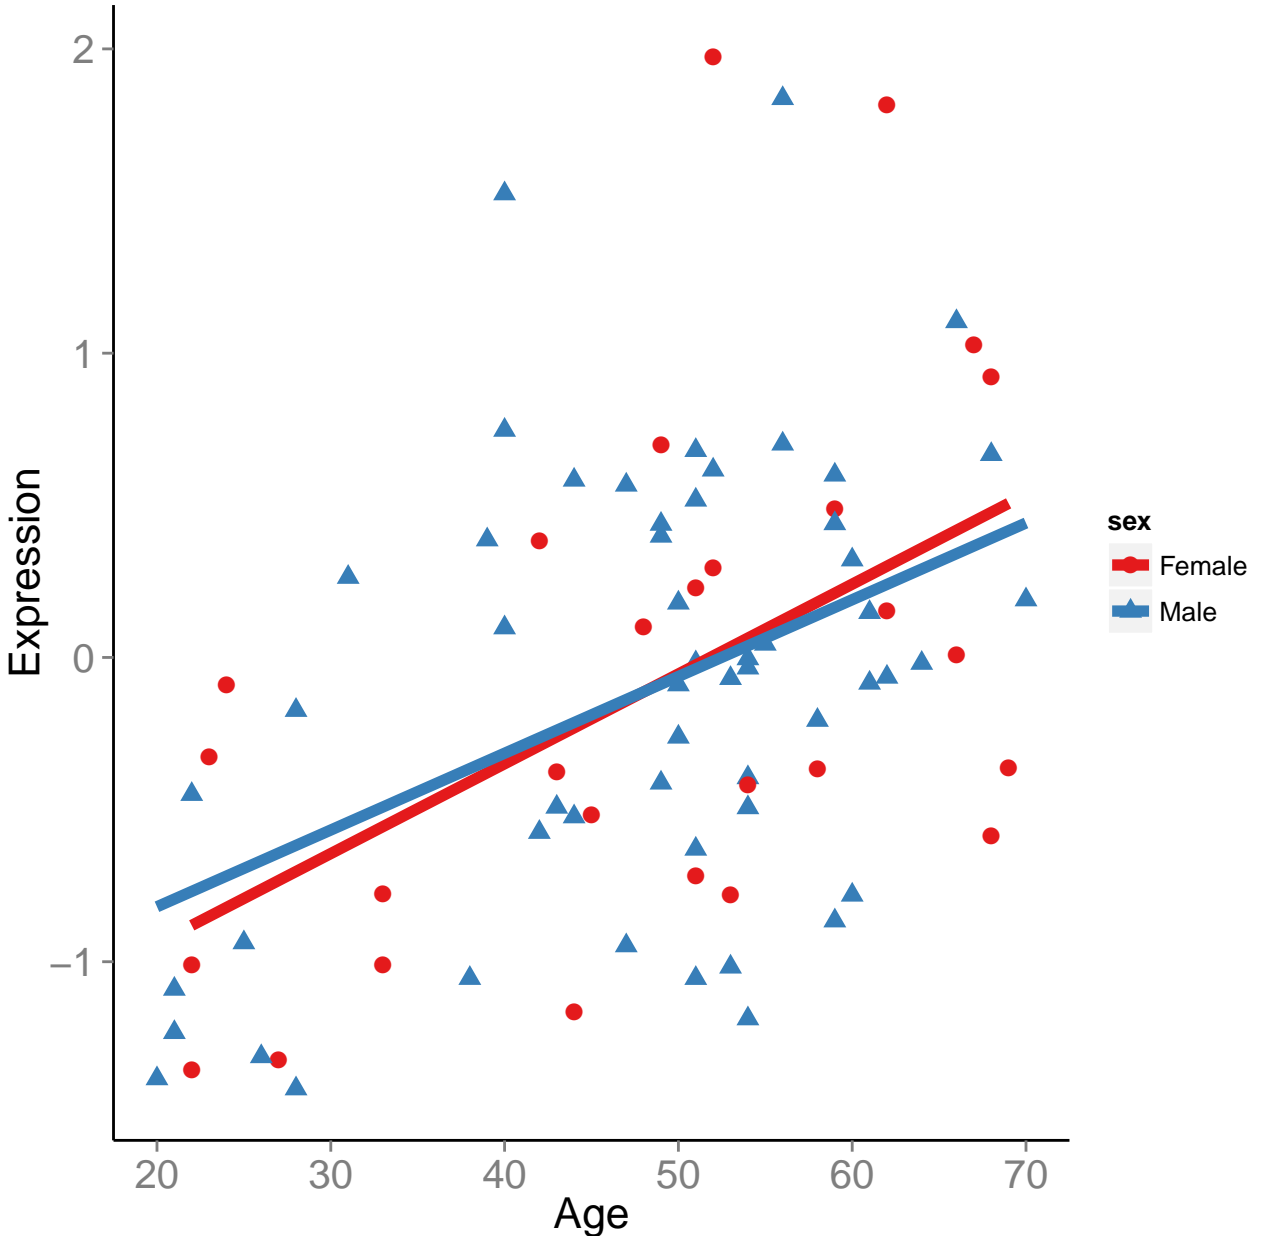

Heart: RP11-93B14.5 Pearson-R=0.47 Pval=7.71E-06

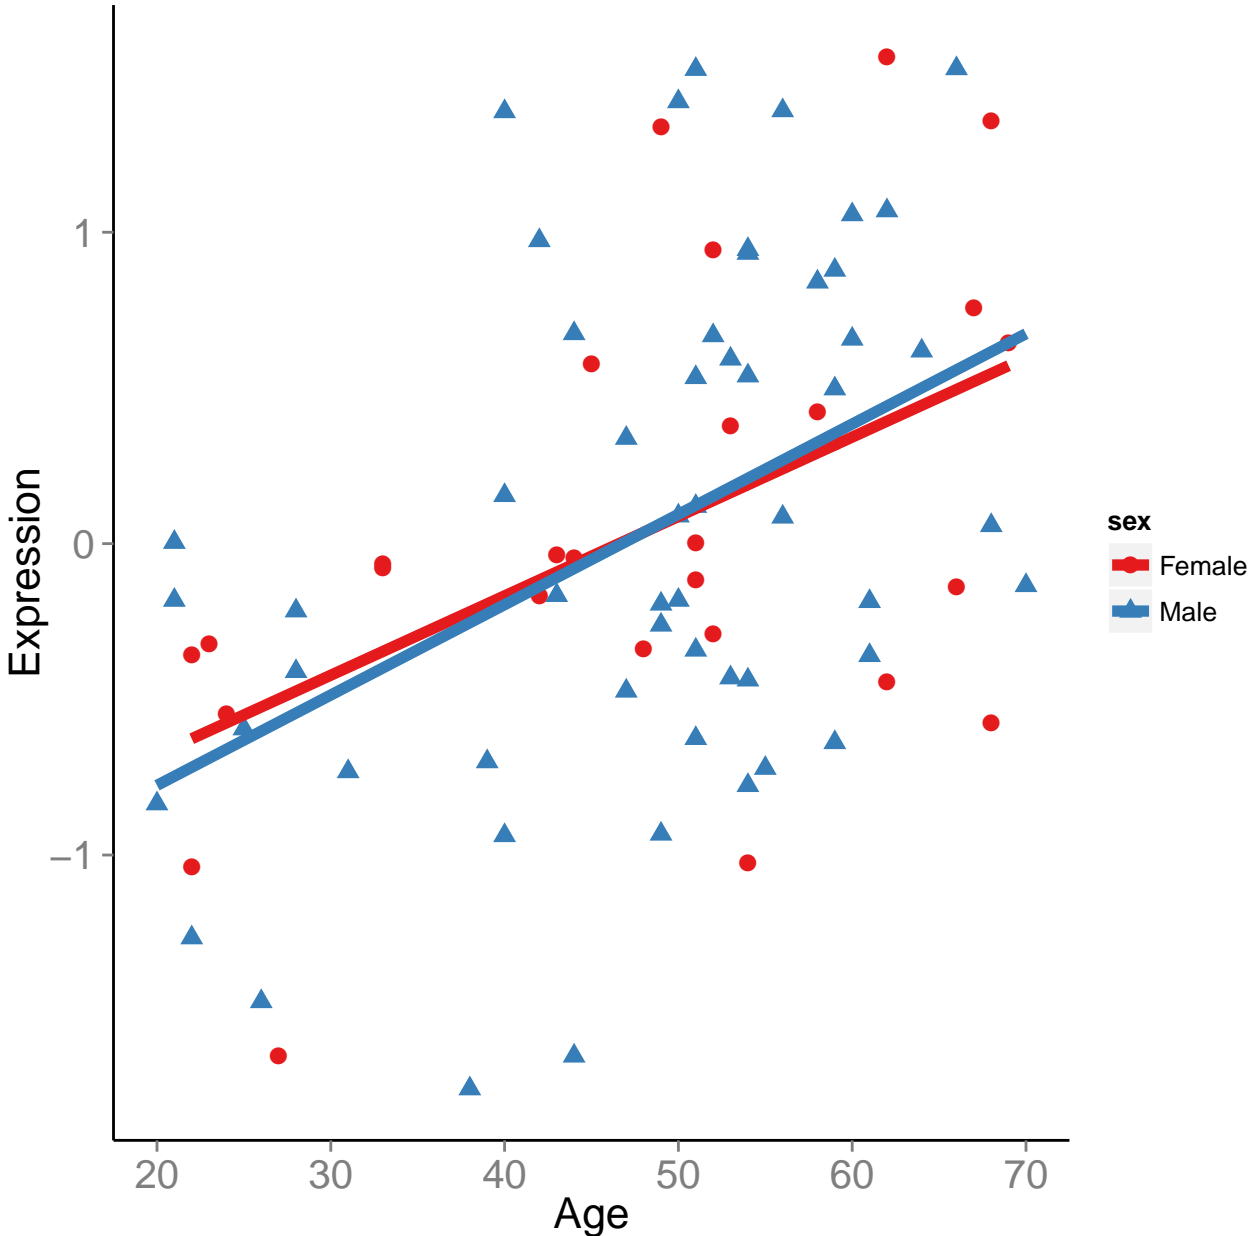

Heart: CAMTA2 Pearson-R=0.47 Pval=6.29E-06

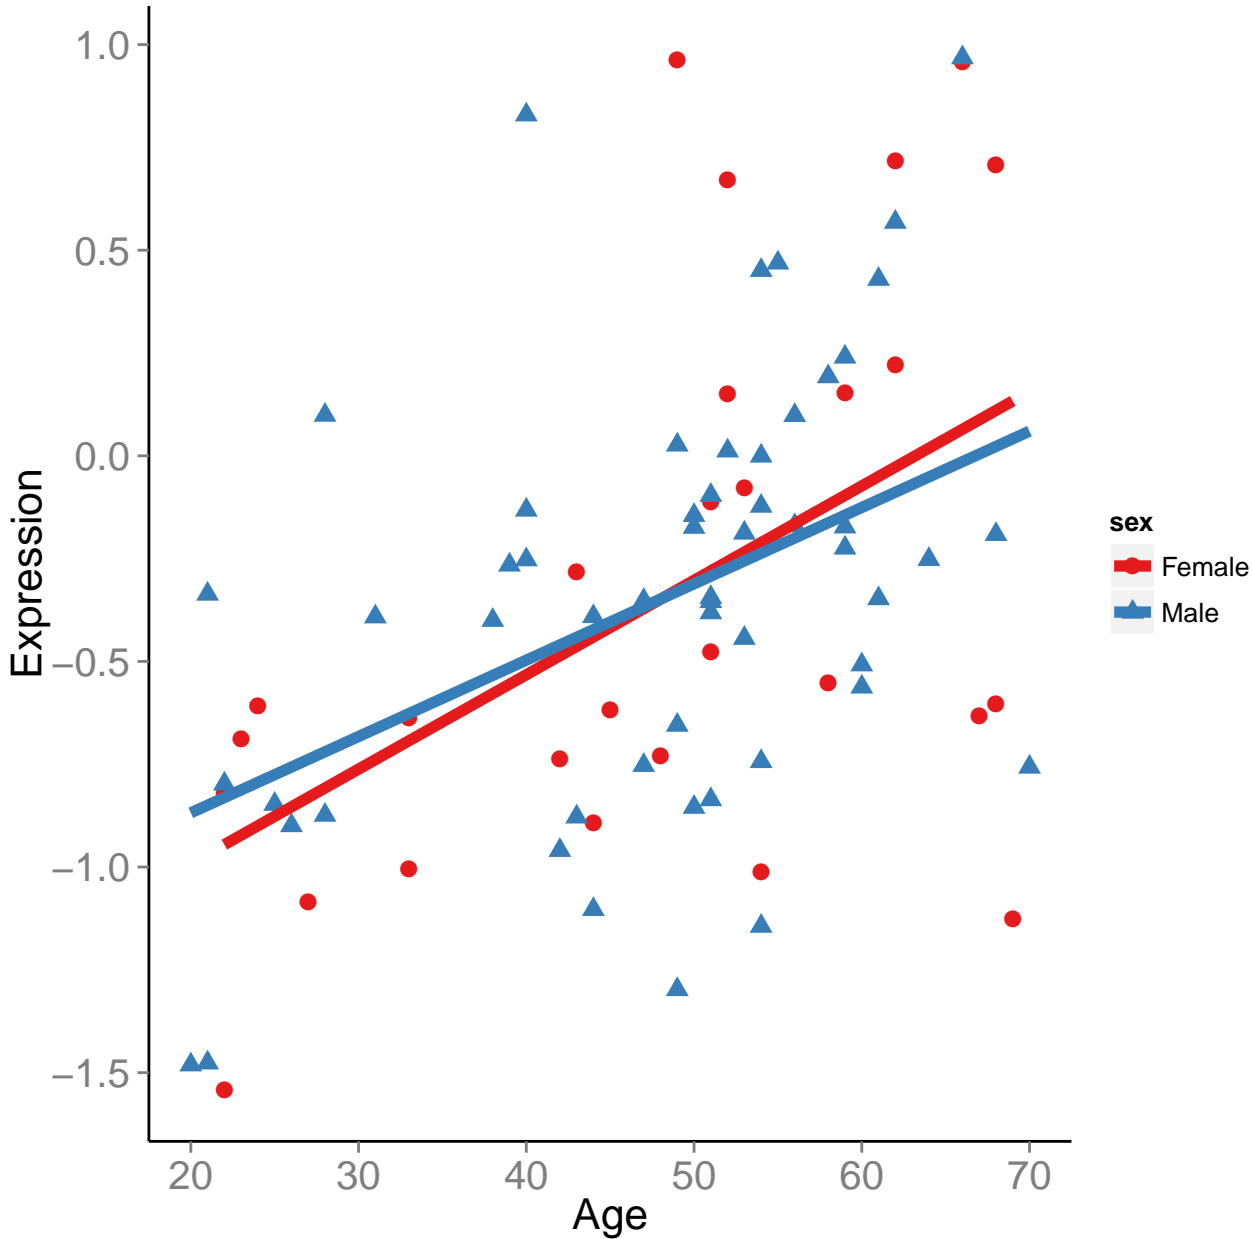

Heart: SAMD1 Pearson-R=0.47 Pval=6.74E-06

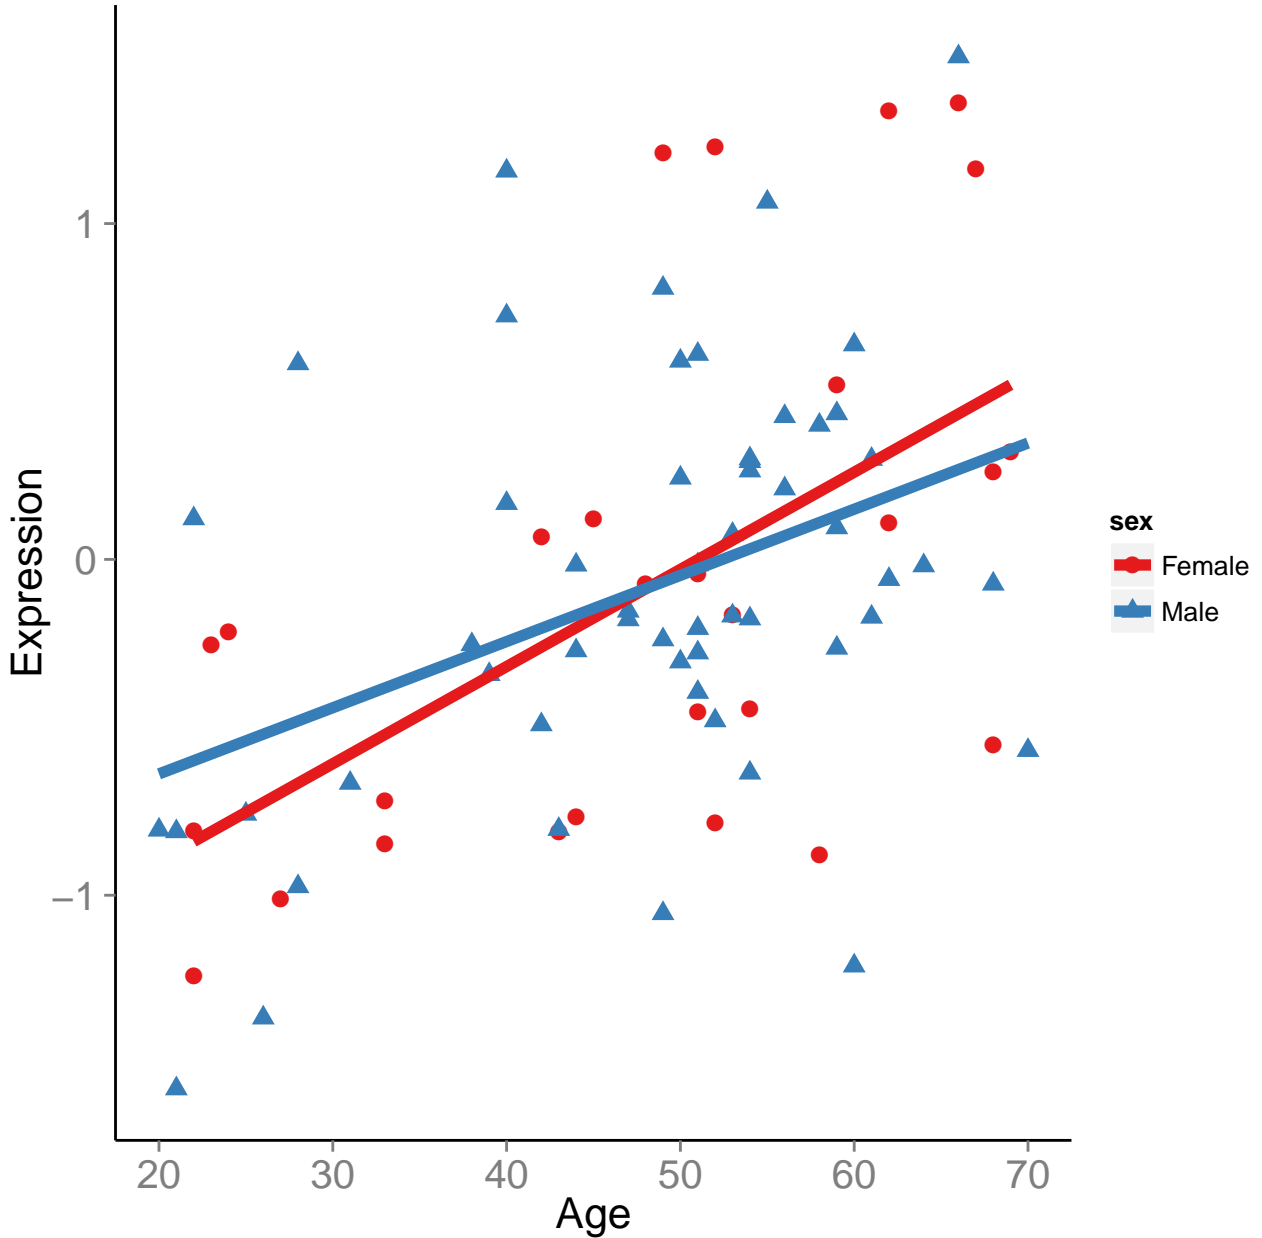

Heart: MAPRE1 Pearson-R=-0.47 Pval=7.75E-06

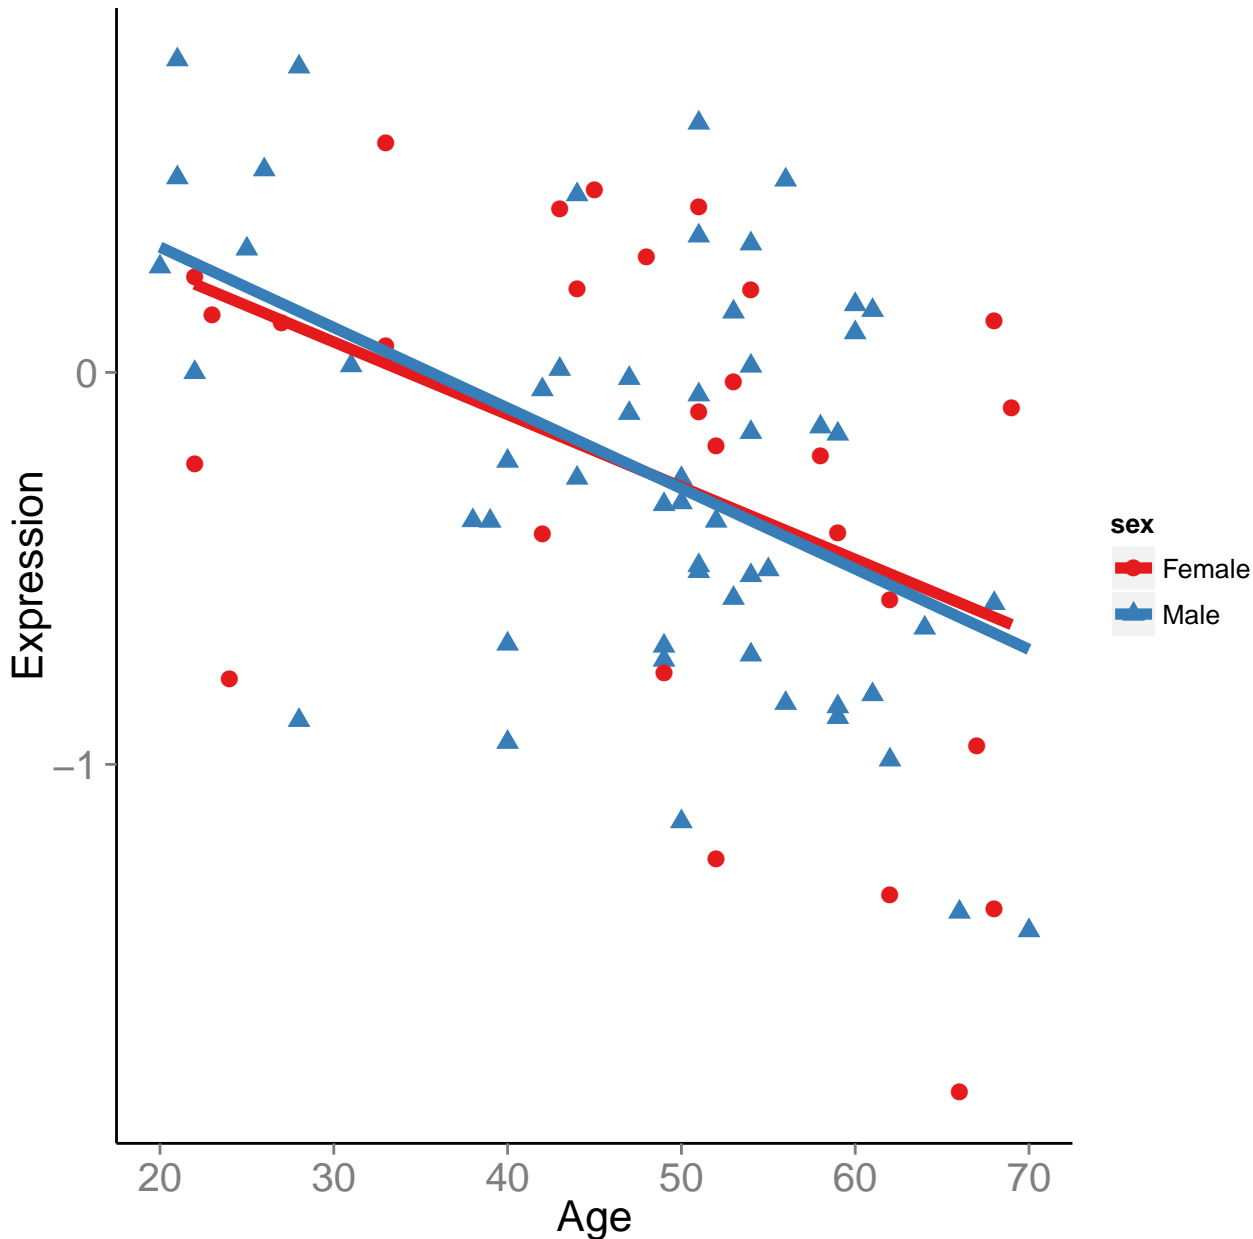

Heart: ATXN10 Pearson-R=-0.47 Pval=6.77E-06

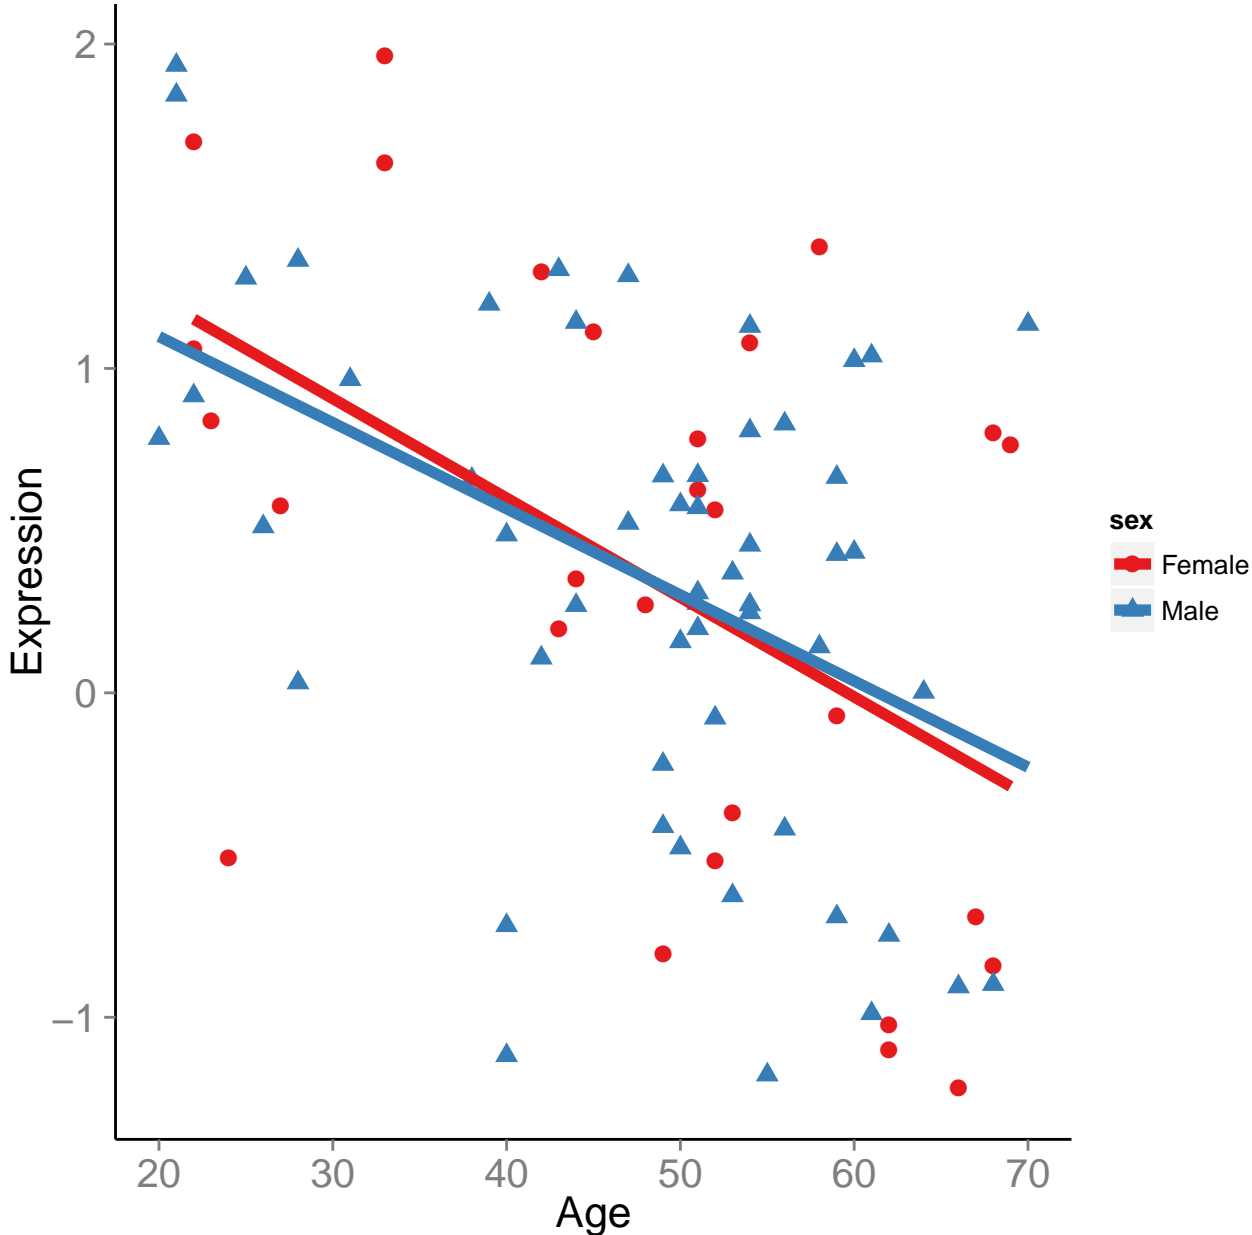

Heart: POLDIP3 Pearson-R=0.47 Pval=7.56E-06

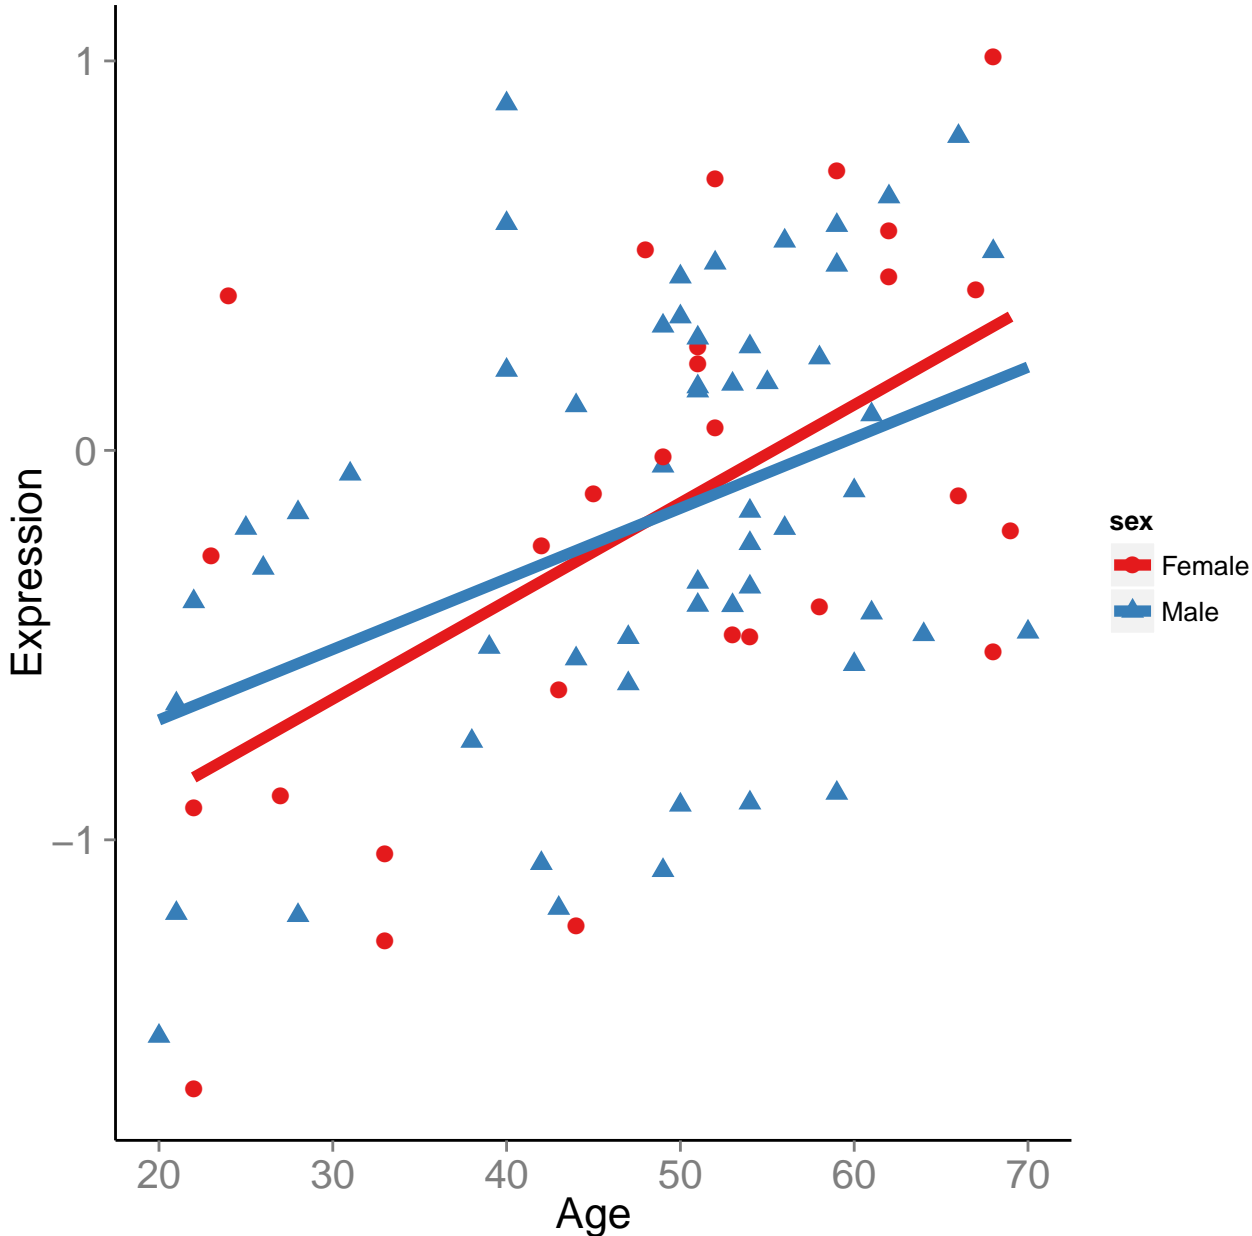

Heart: MRPS18C Pearson-R=-0.47 Pval=6.19E-06

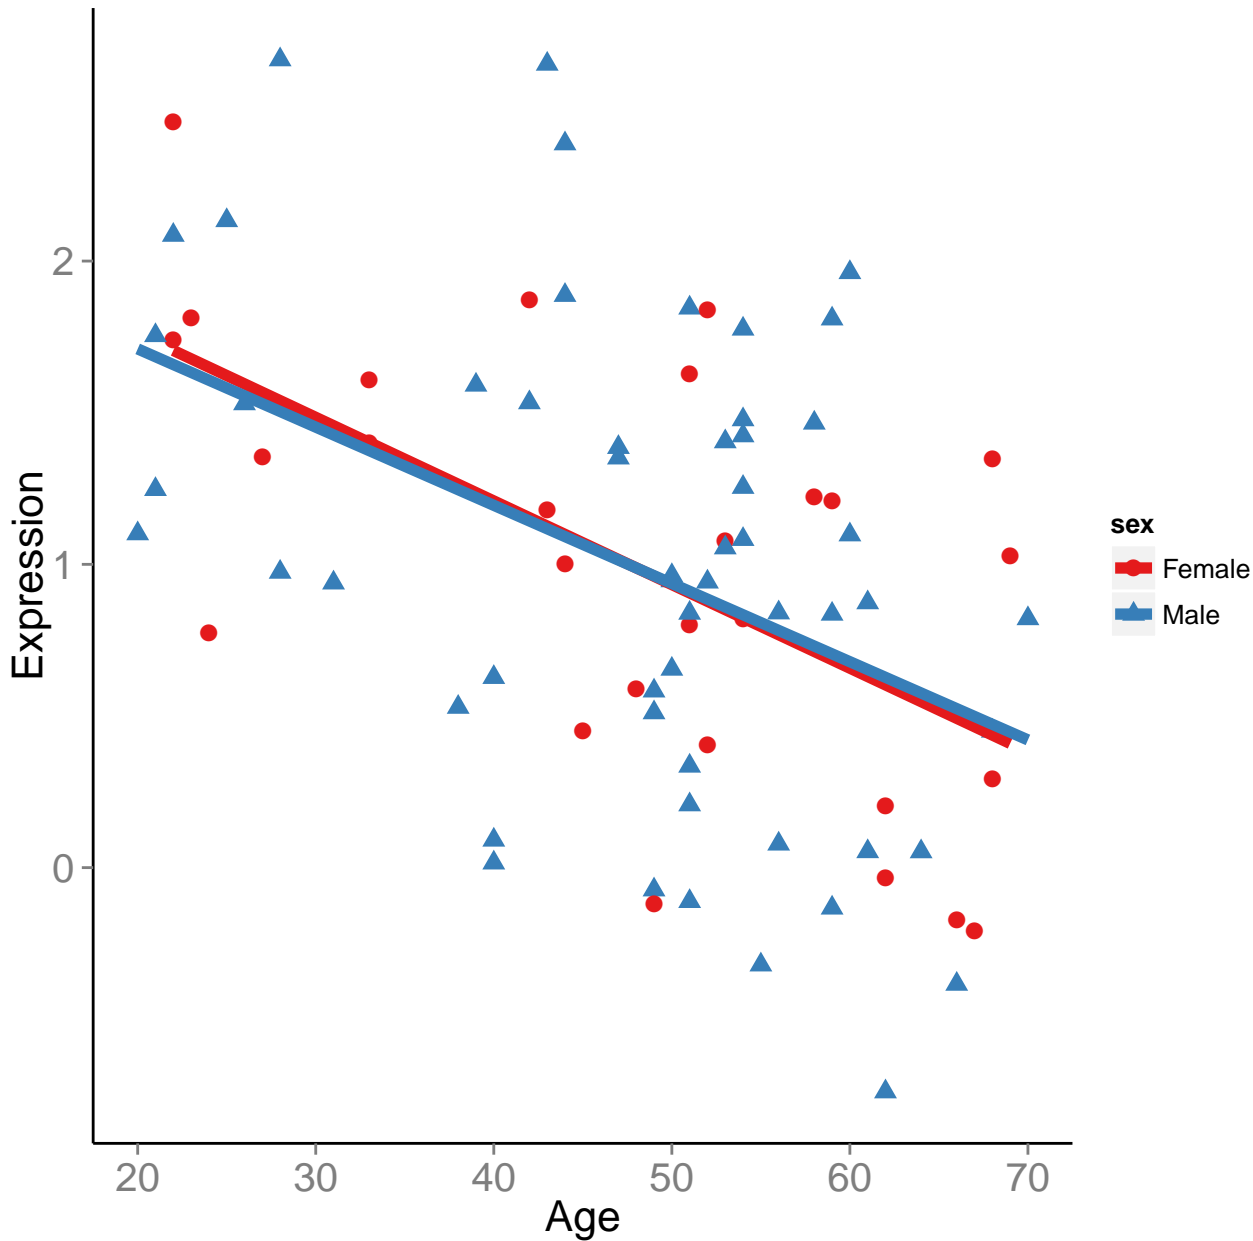



Heart: KIAA0913 Pearson-R=0.47 Pval=7.50E-06

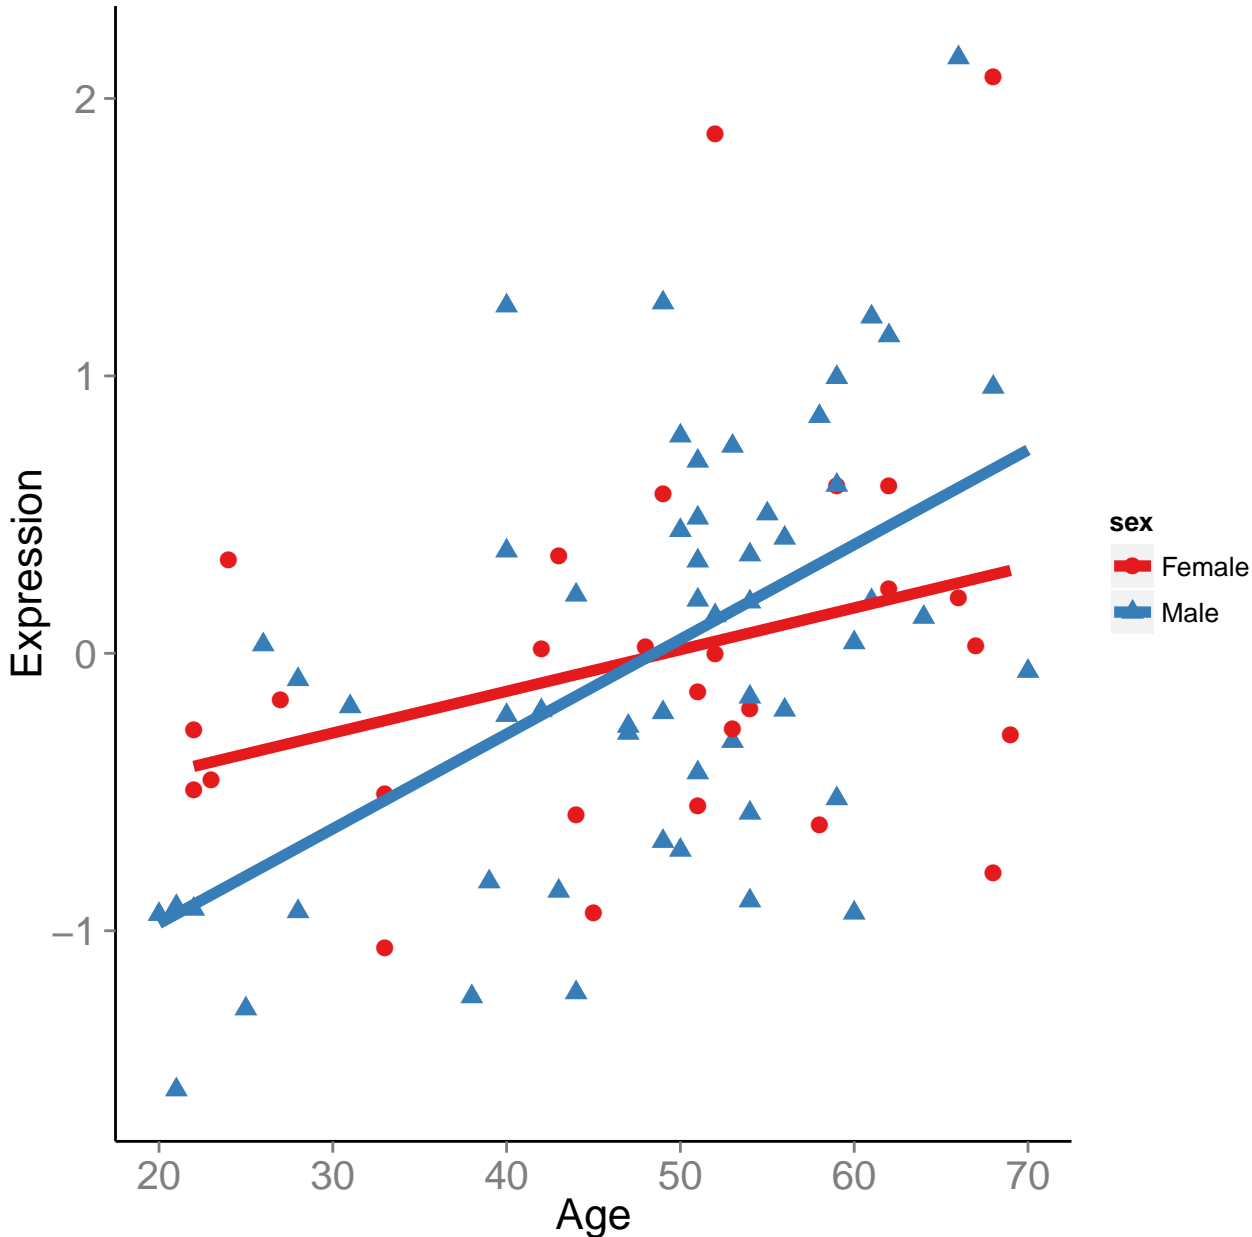

Heart: UCHL3 Pearson-R=-0.47 Pval=6.92E-06

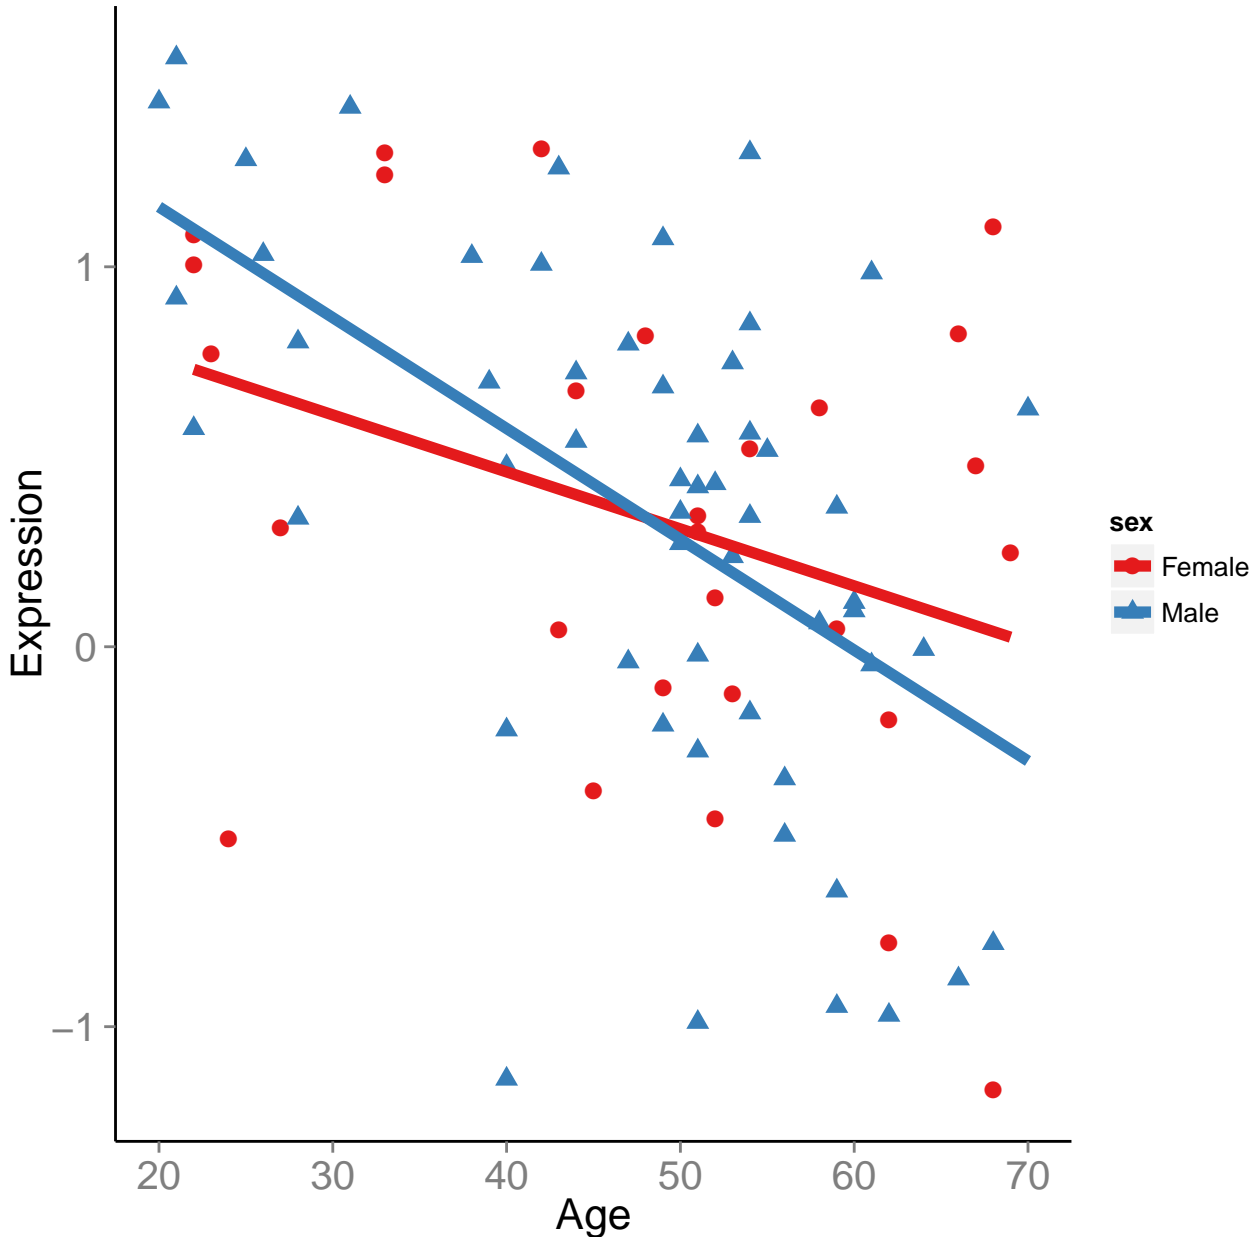

Heart: RECQL5 Pearson-R=0.47 Pval=8.20E-06

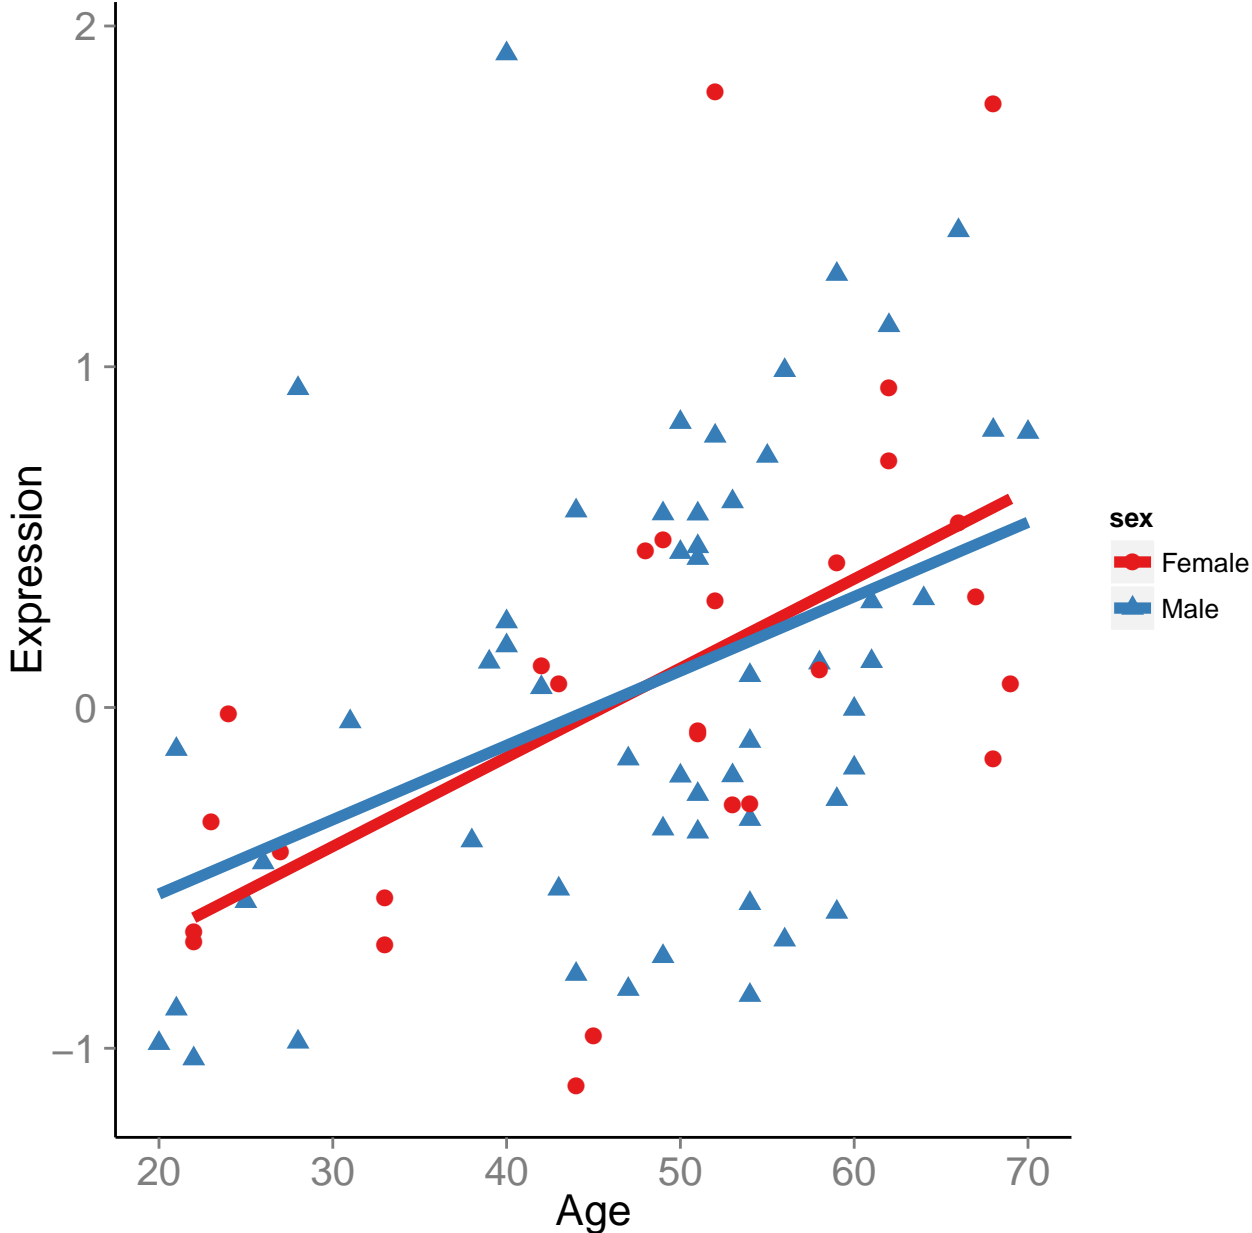

Heart: USP21 Pearson-R=0.47 Pval=8.37E-06

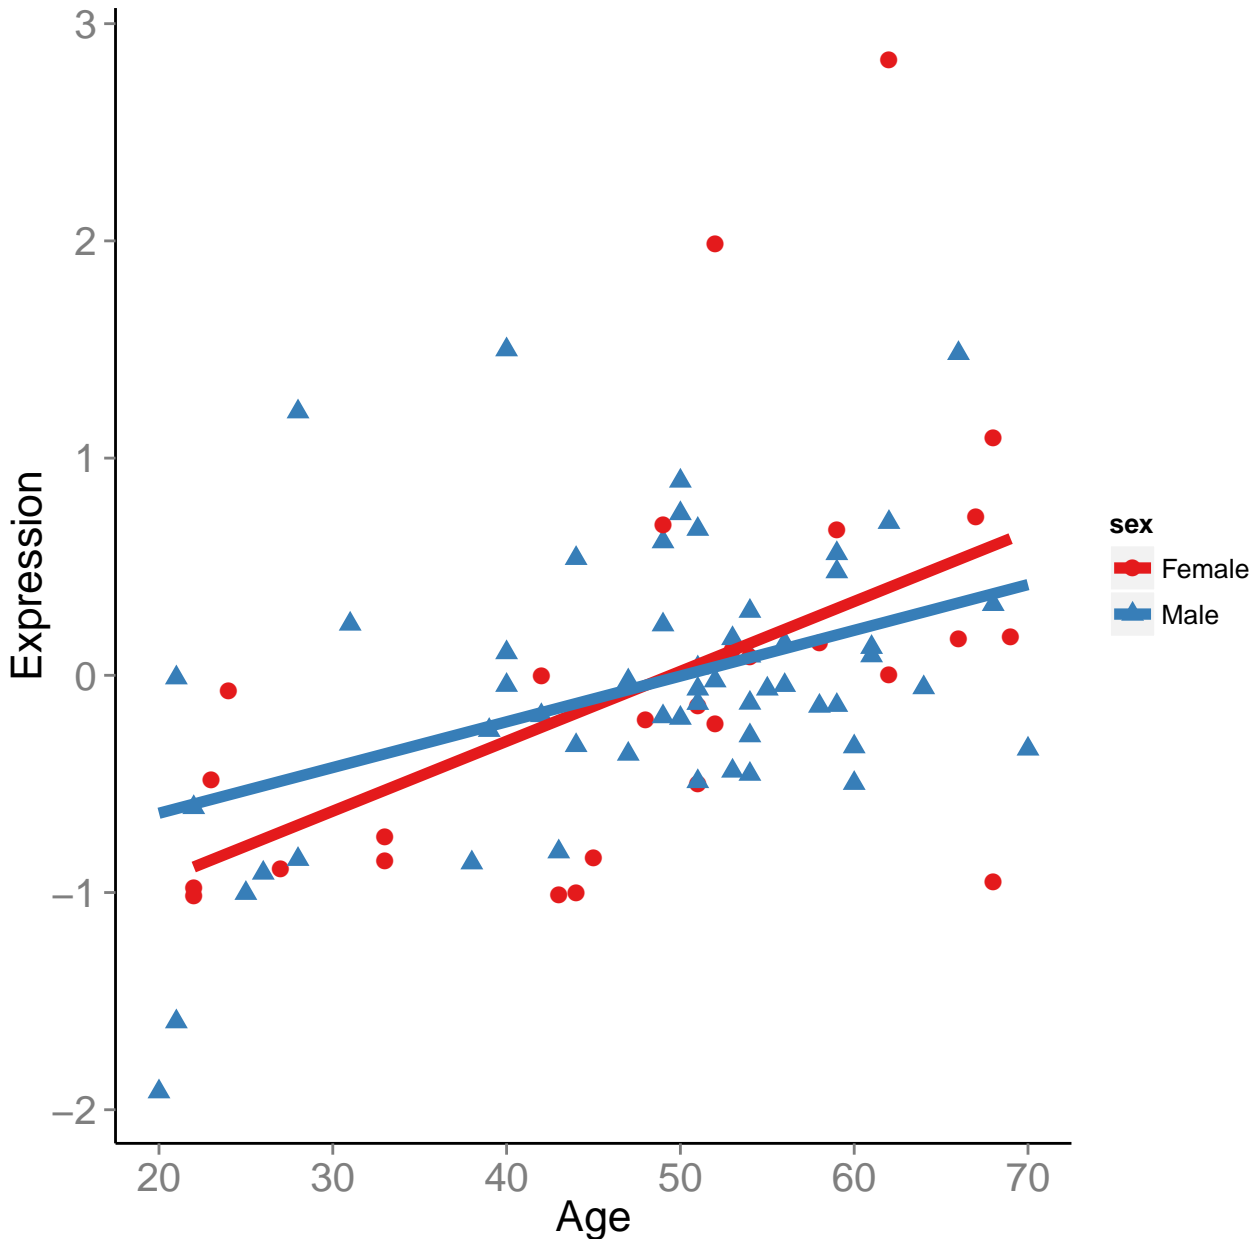

Heart: MAFF Pearson-R=0.47 Pval=8.71E-06

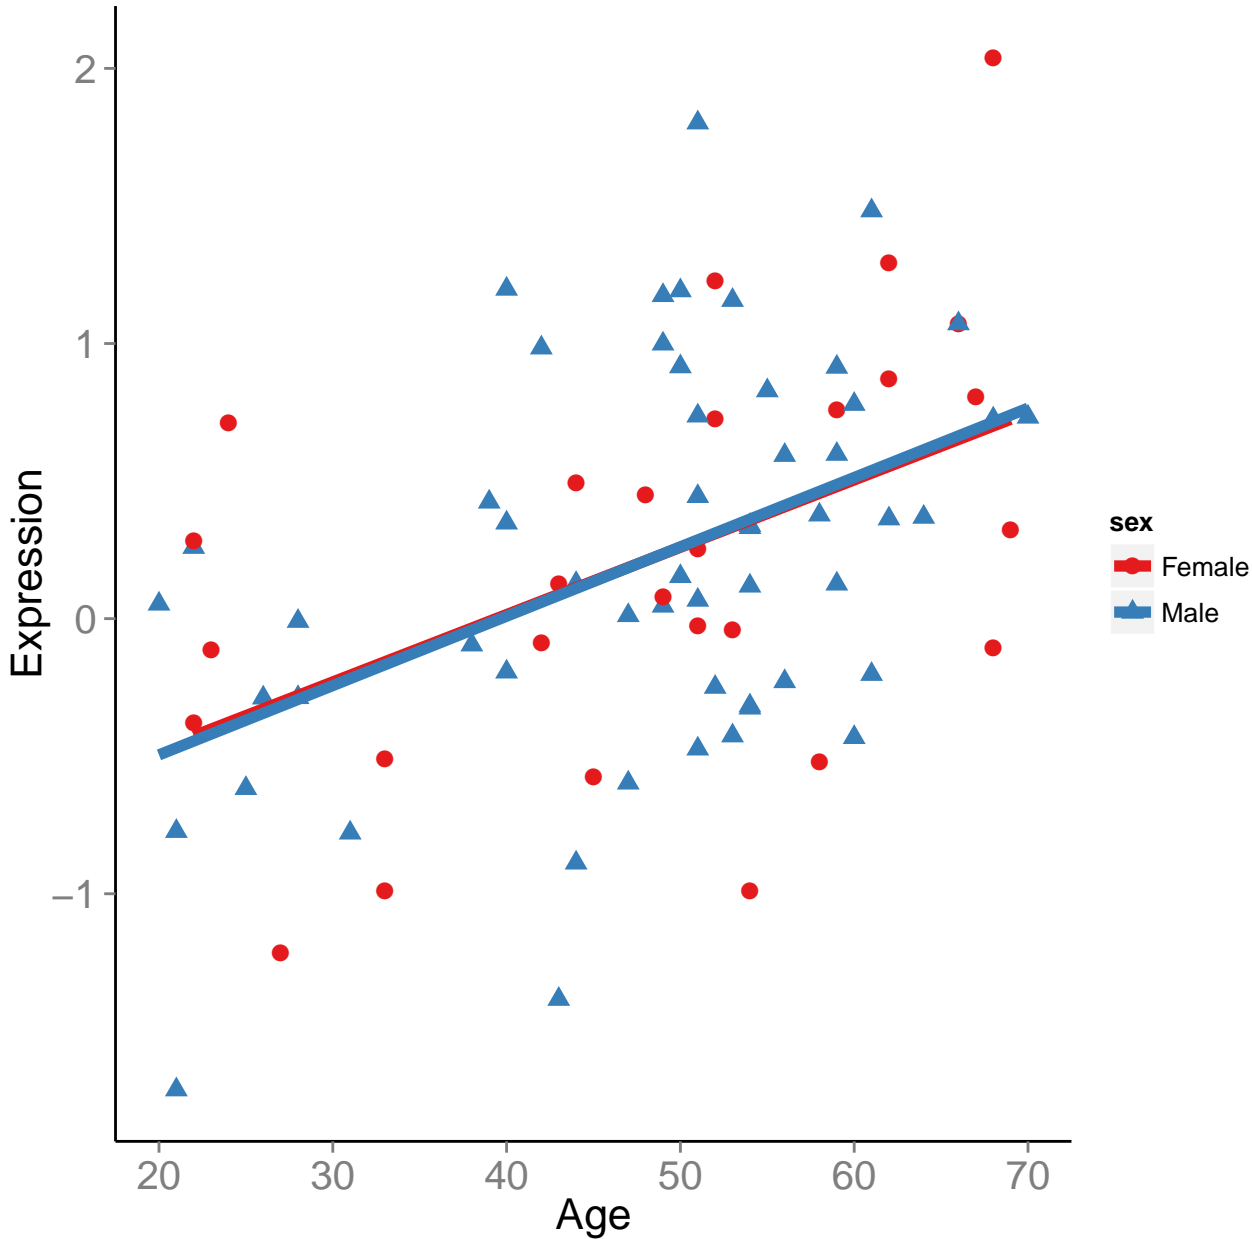

Lung: EDA2R Pearson-R=0.56 Pval=2.77E-11

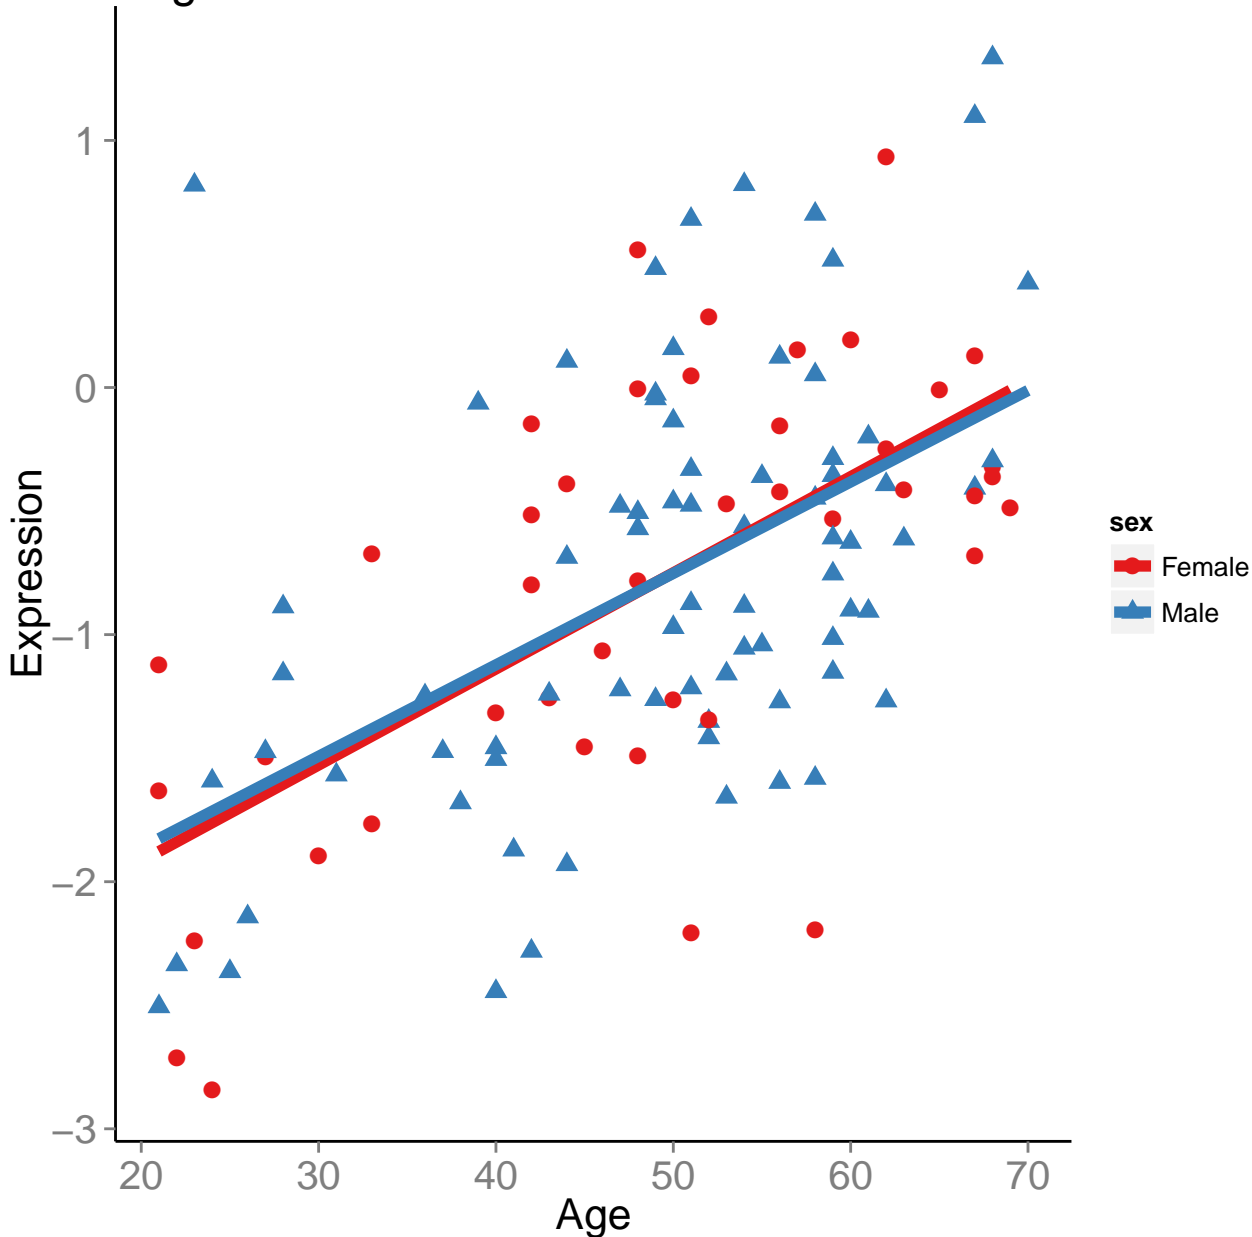

Lung: ZMAT3 Pearson-R=0.49 Pval=1.37E-08

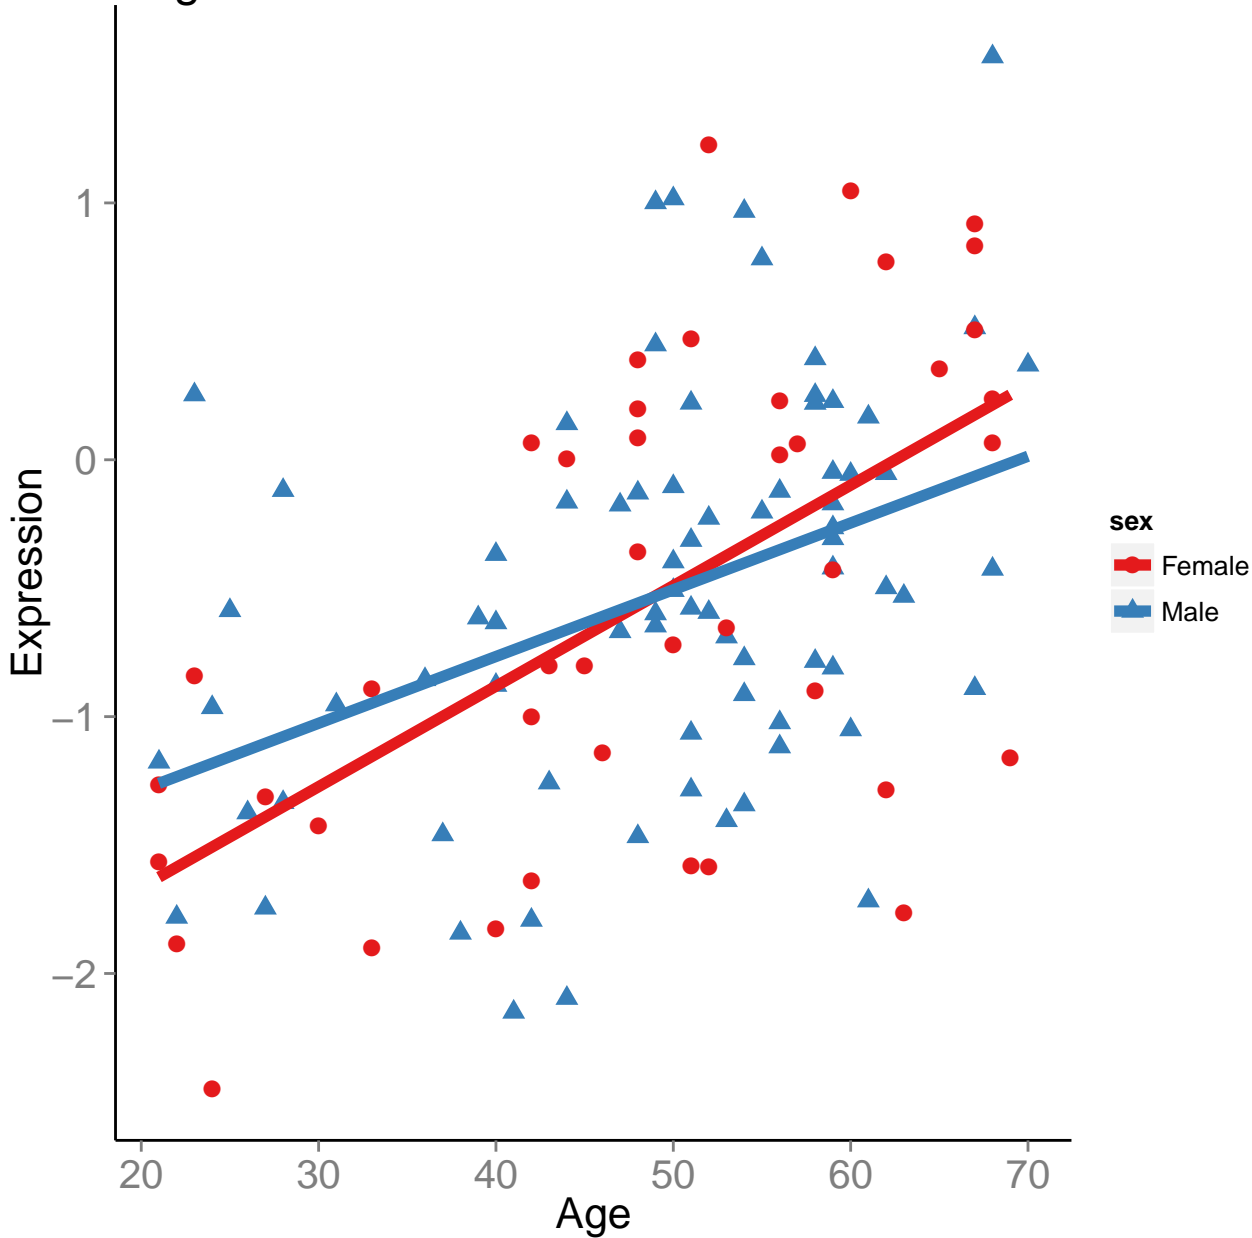

Lung: IMPA2 Pearson-R=-0.49 Pval=1.79E-08

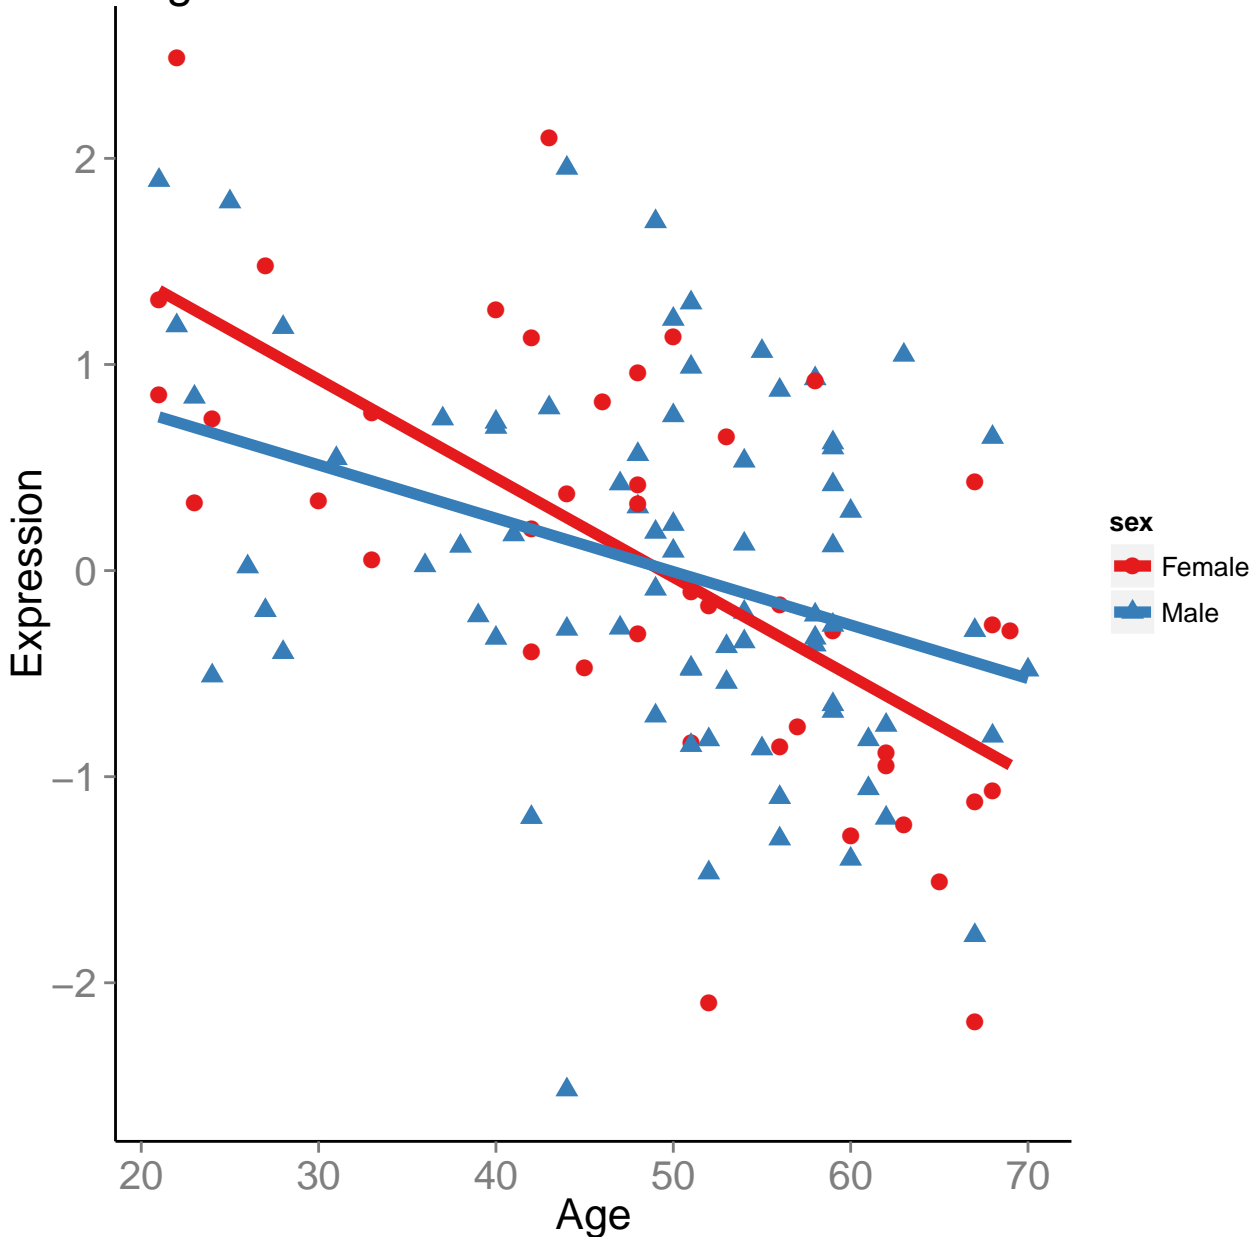



Lung: ITGBL1 Pearson-R=0.49 Pval=1.92E-08

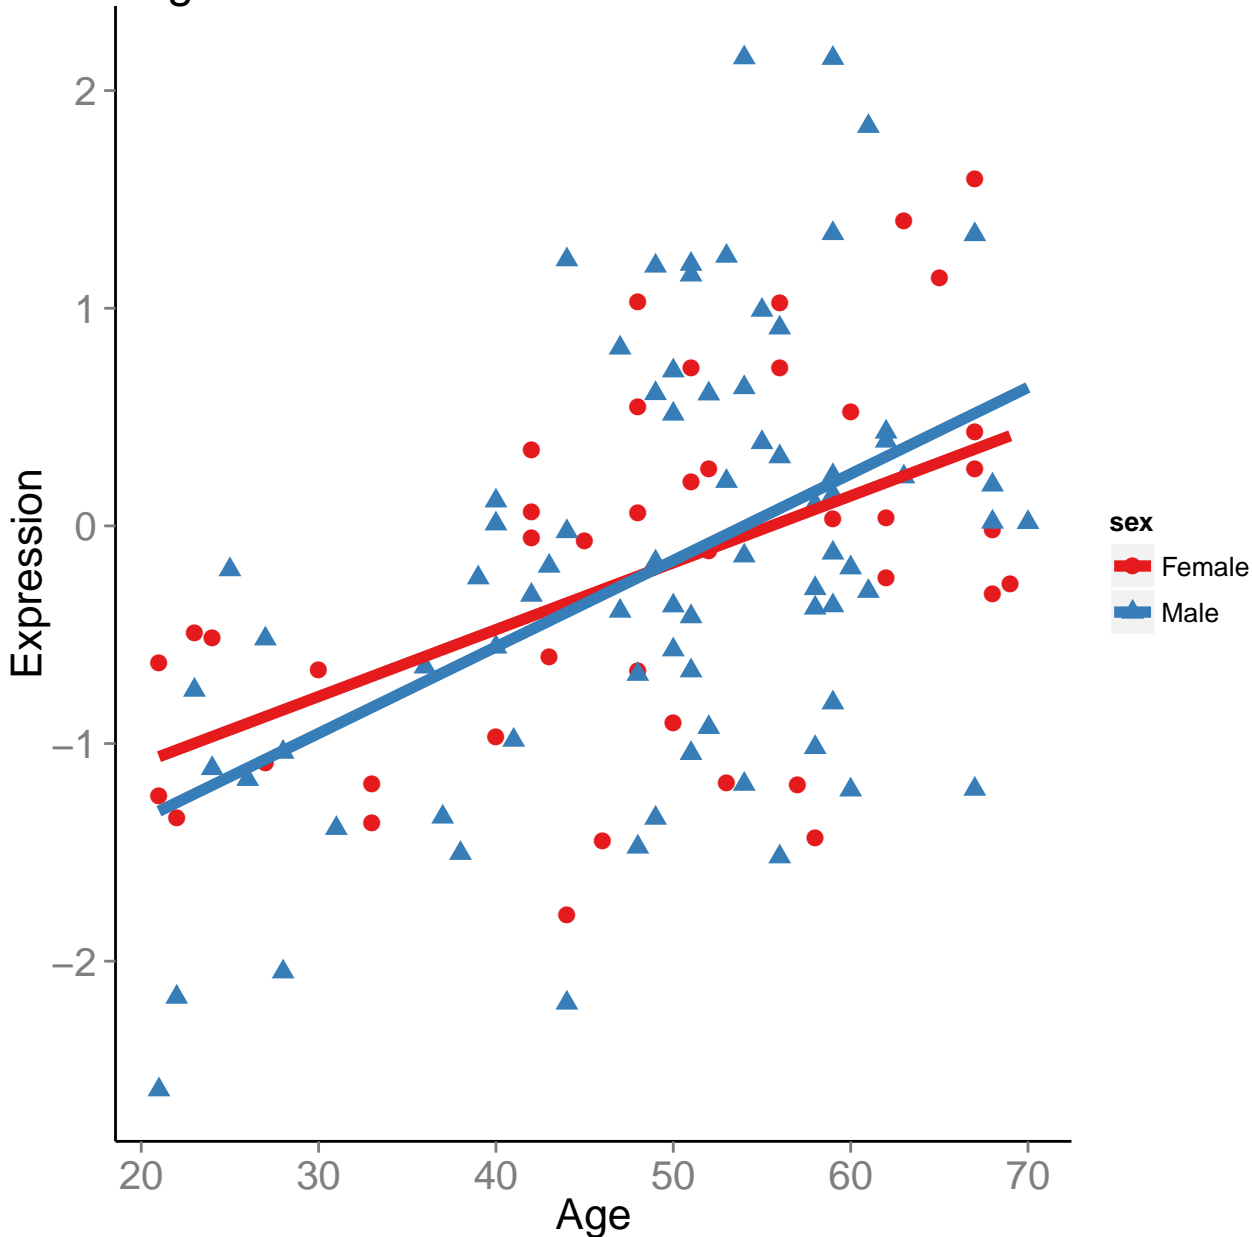

Lung: C10orf10 Pearson-R=0.48 Pval=2.69E-08

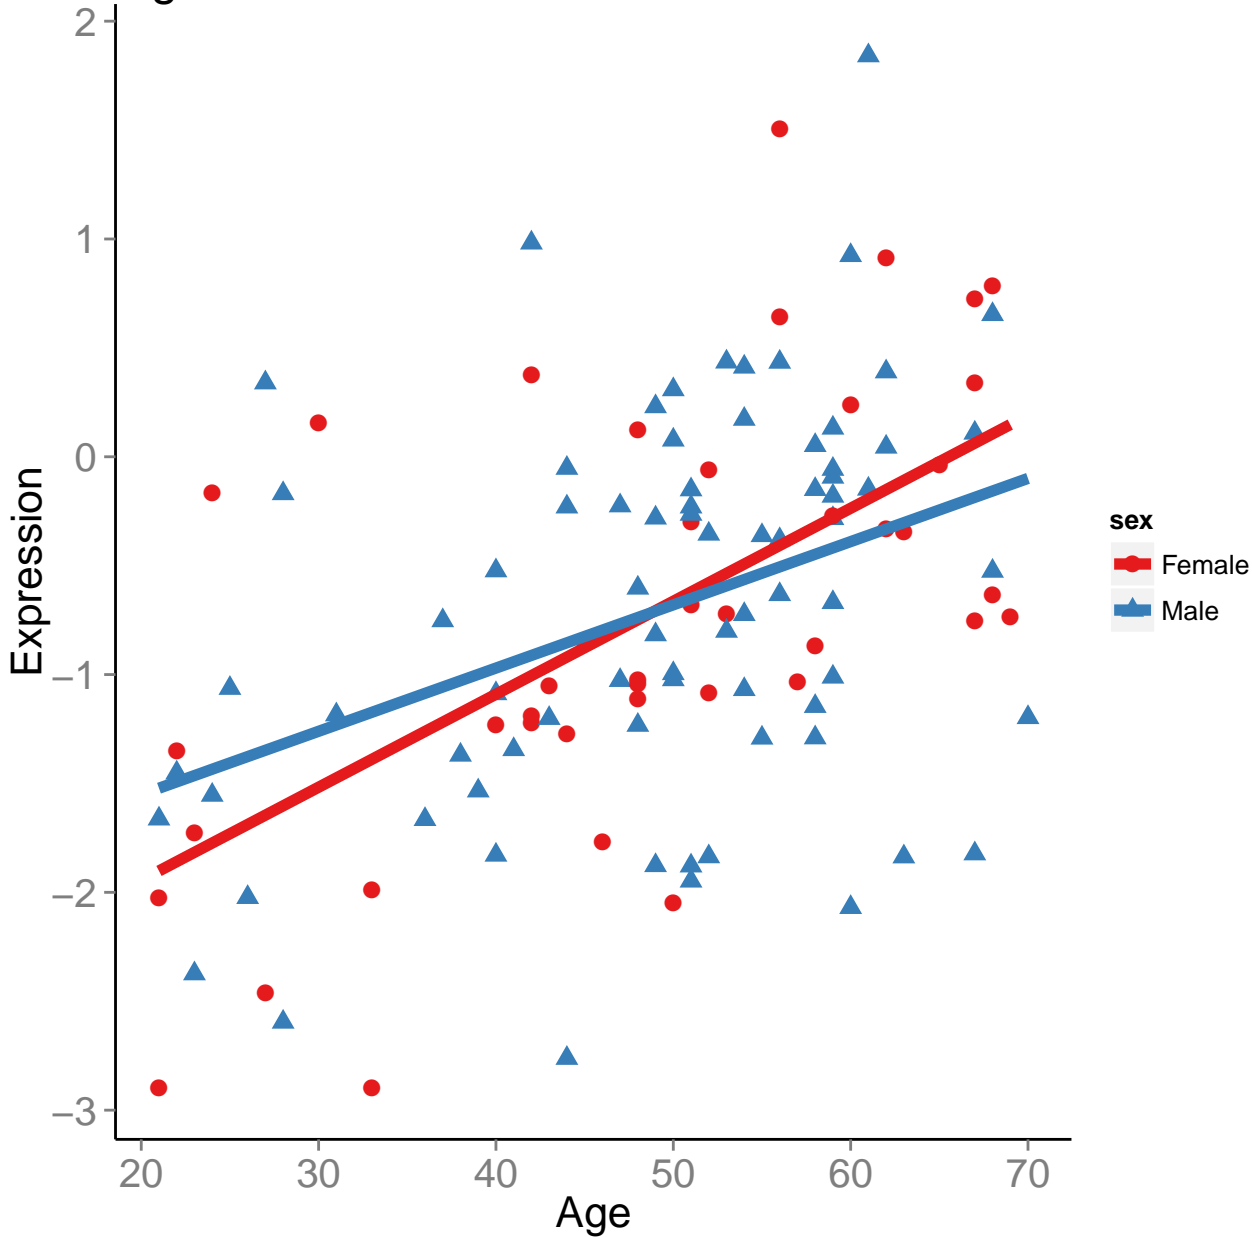

Lung: AC079779.4 Pearson-R=0.47 Pval=4.95E-08

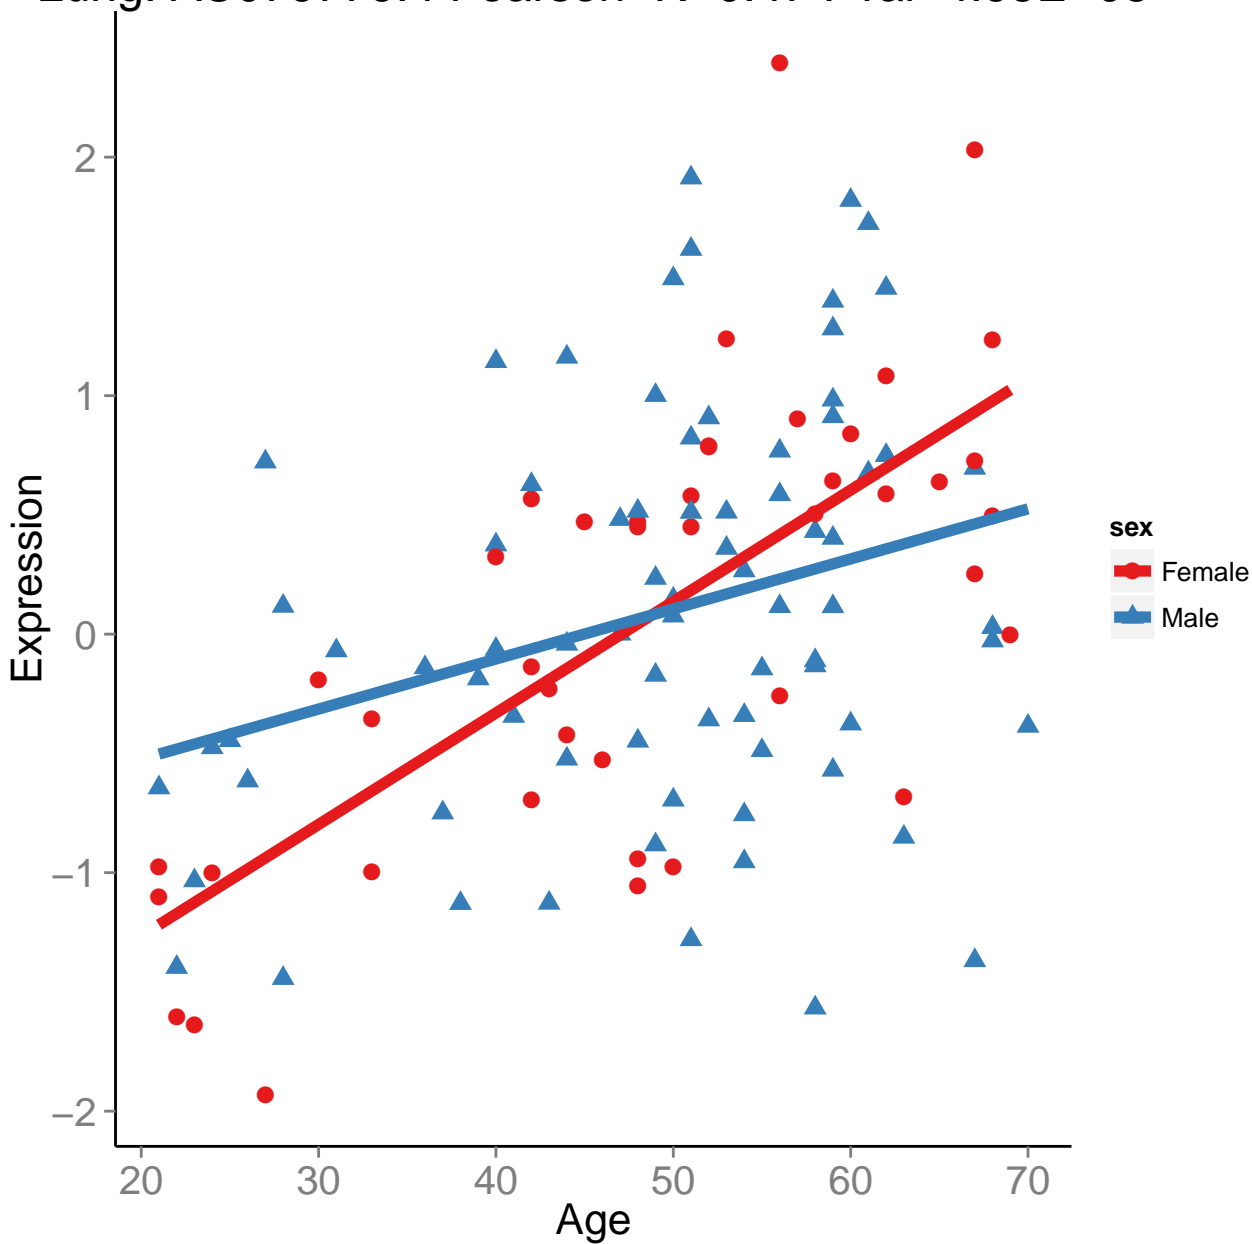

Lung: HENMT1 Pearson-R=-0.46 Pval=1.74E-07

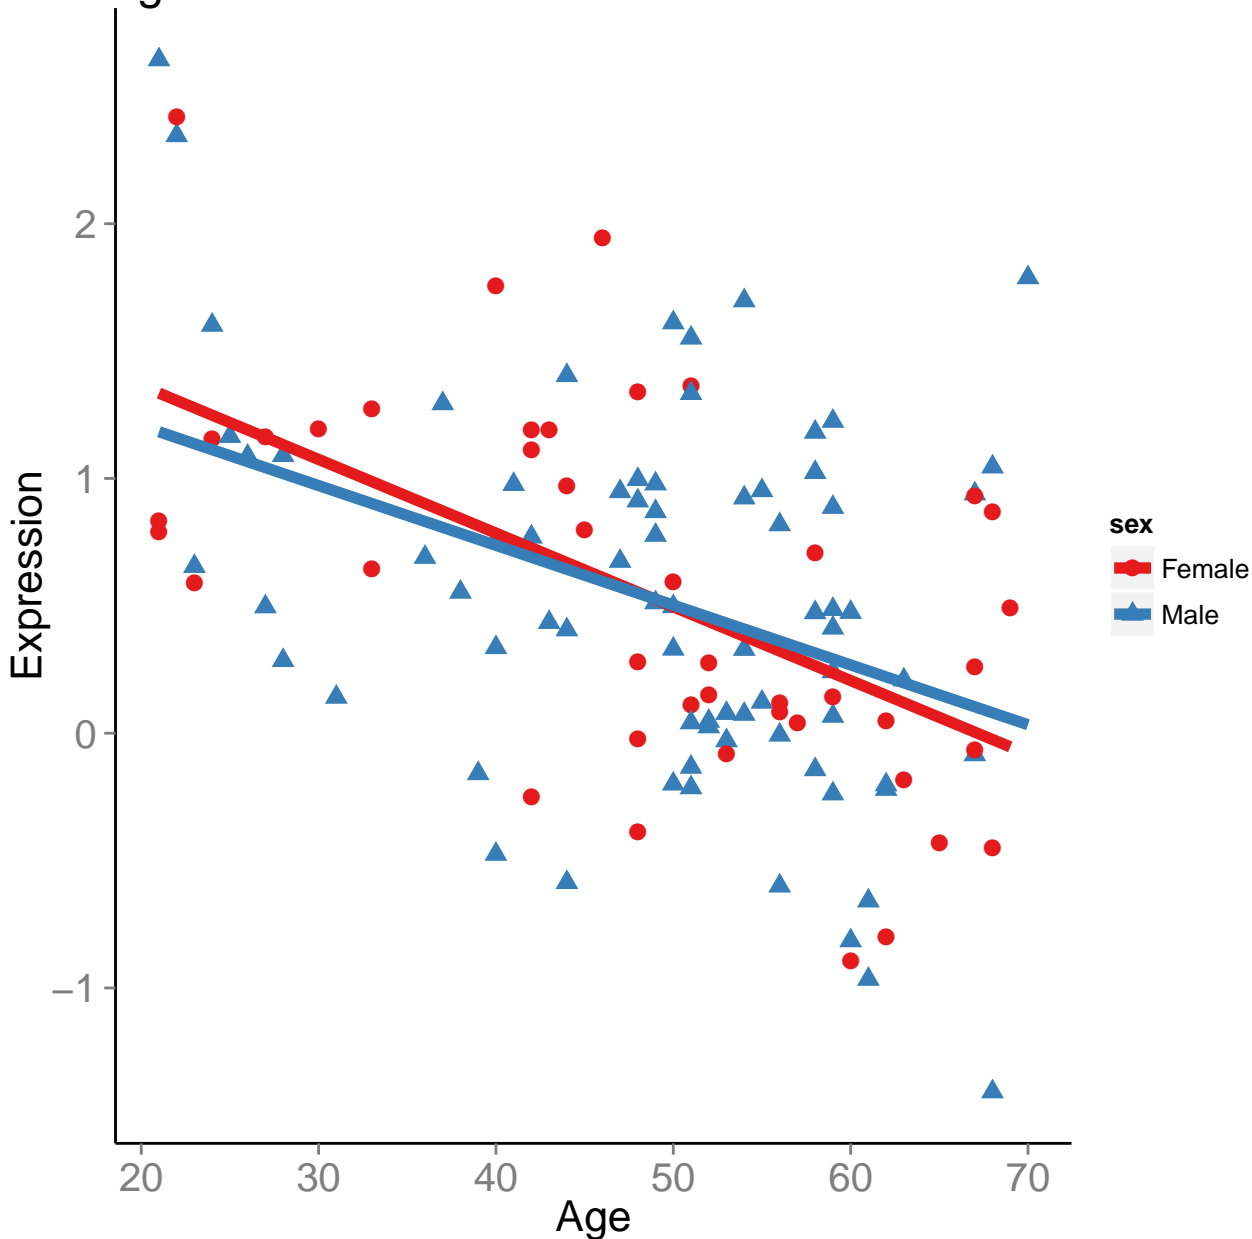

Lung: FMO3 Pearson-R=0.46 Pval=1.55E-07

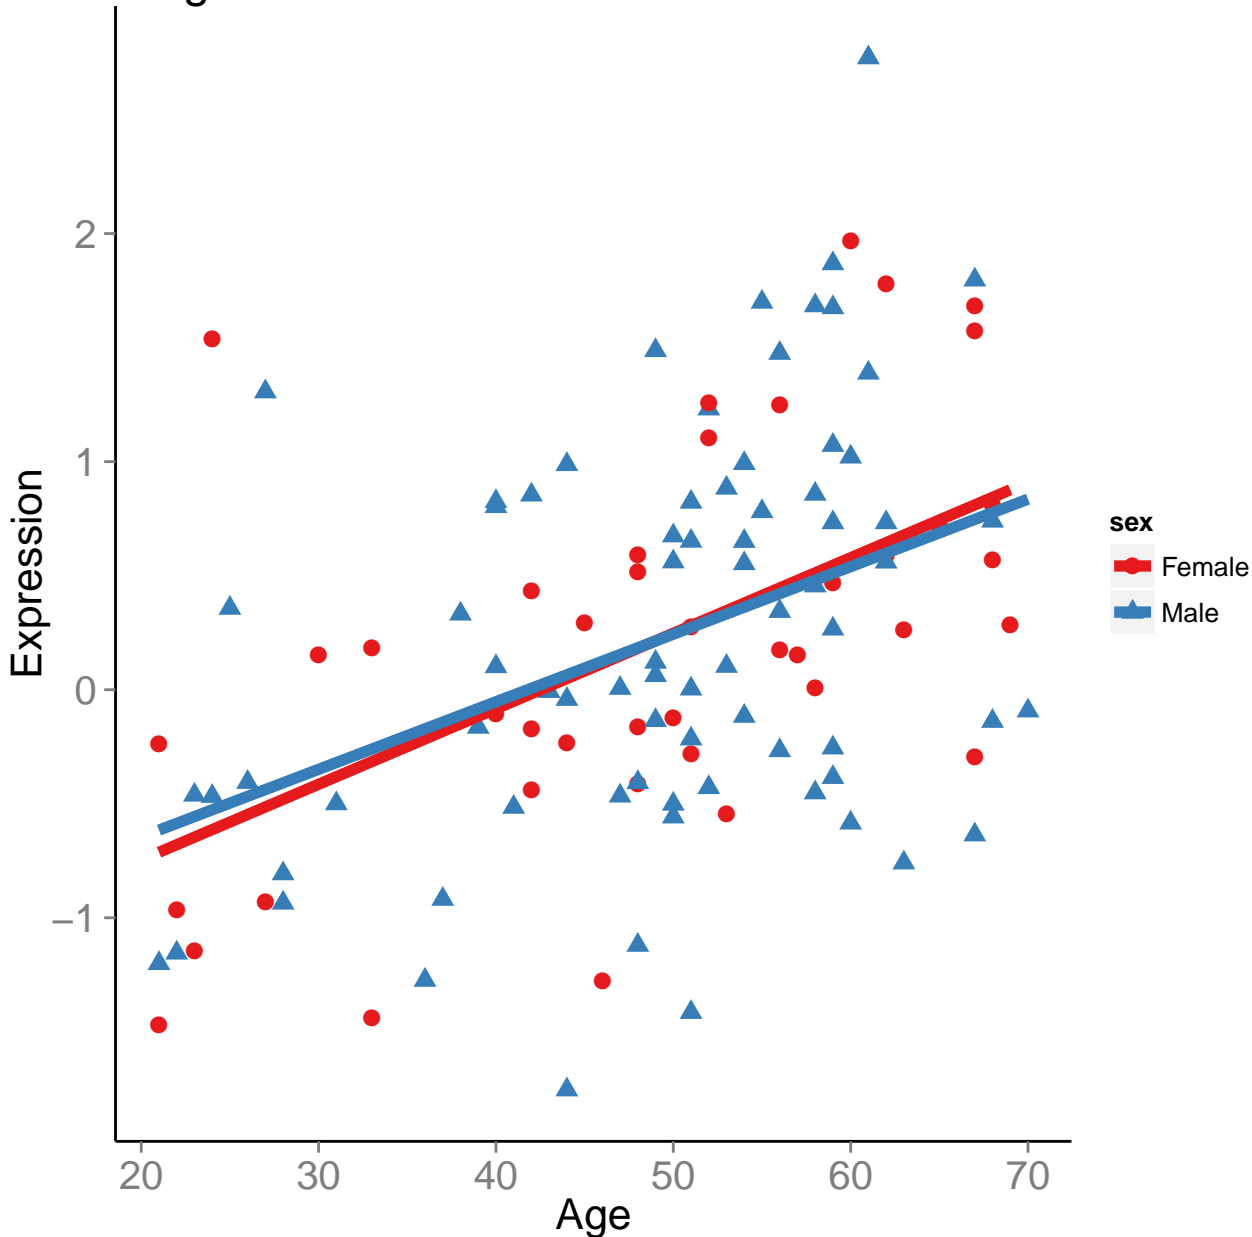

Lung: CFTR Pearson-R=-0.46 Pval=1.76E-07

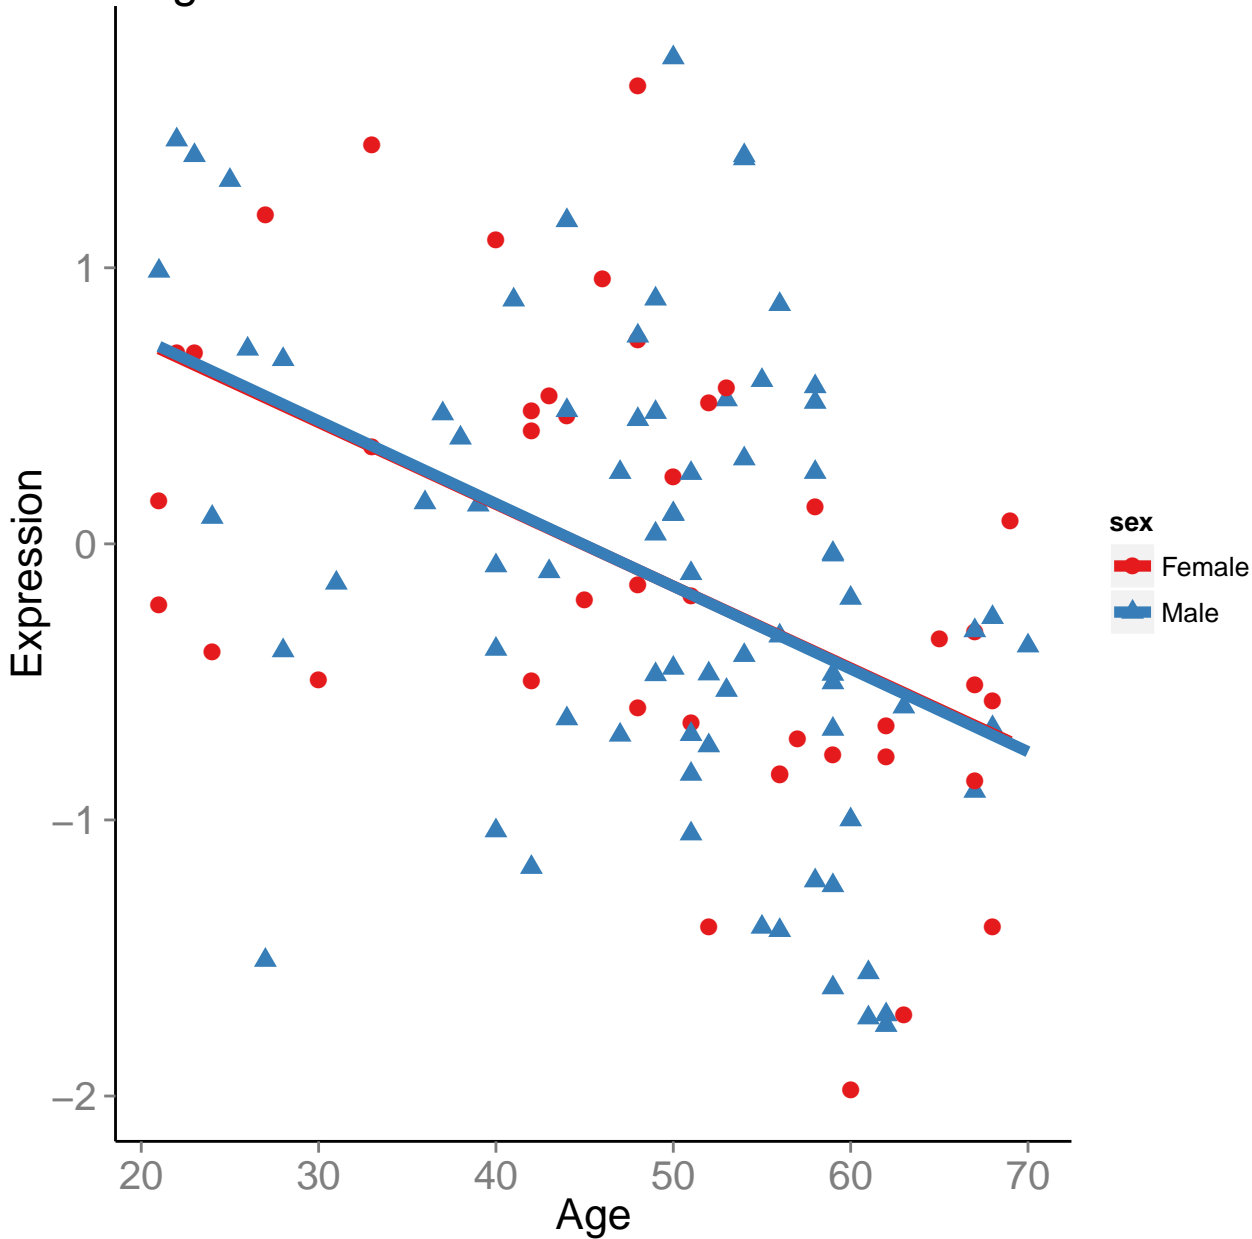

Lung: CERS6 Pearson-R=0.45 Pval=2.24E-07

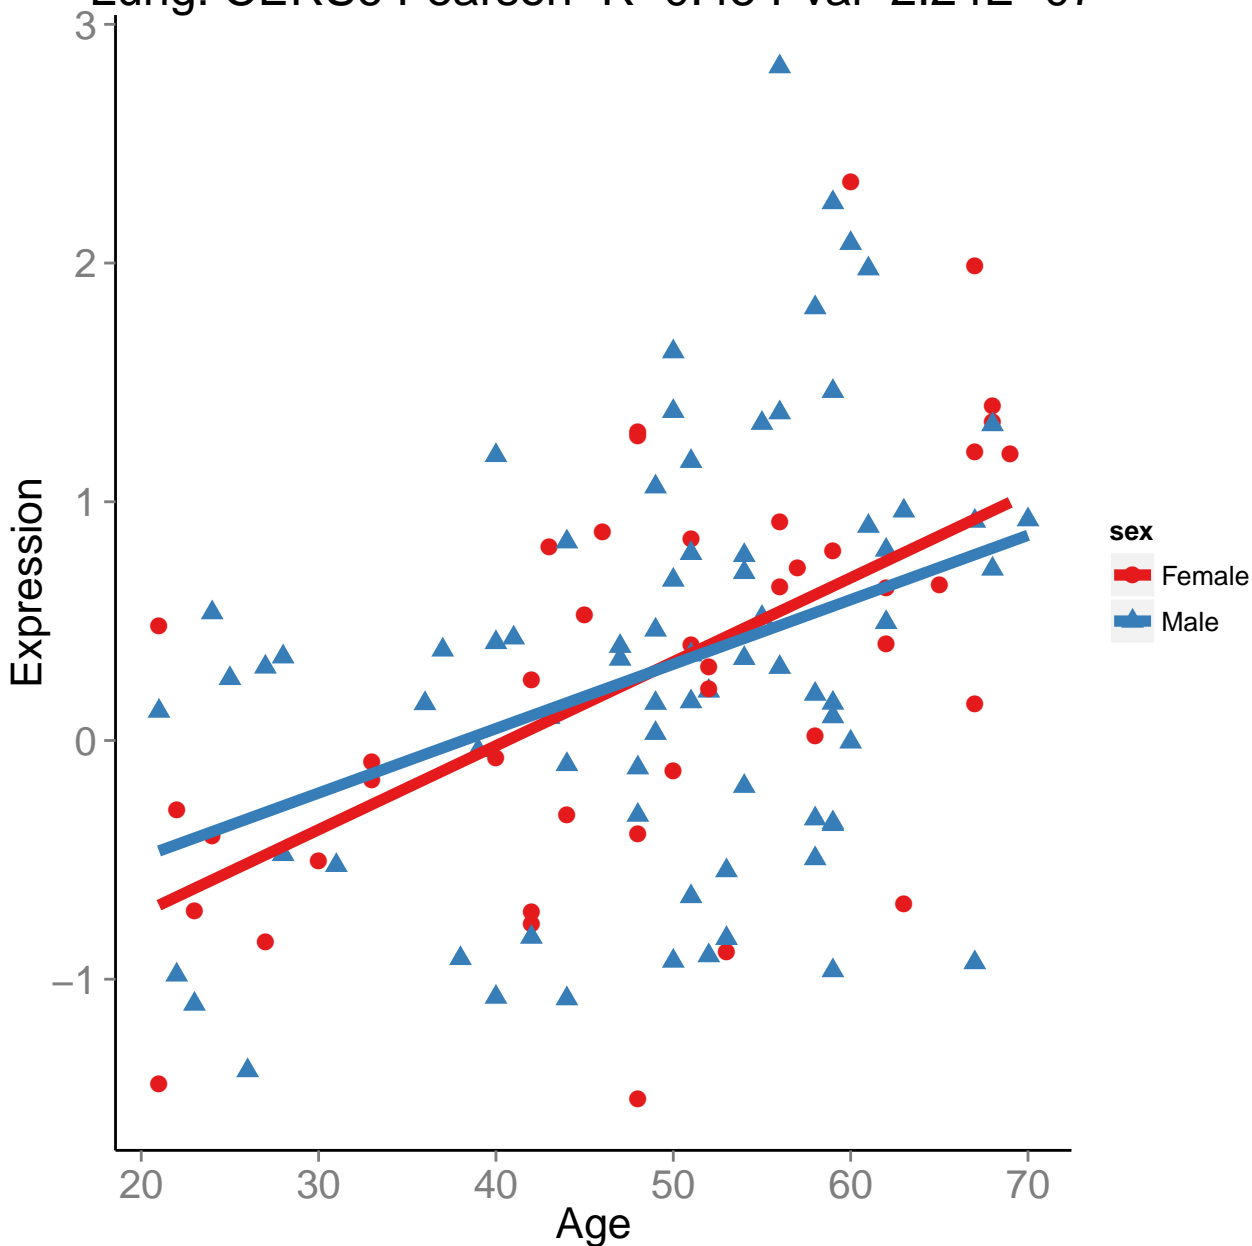

Lung: ATP8B2 Pearson-R=0.45 Pval=2.57E-07

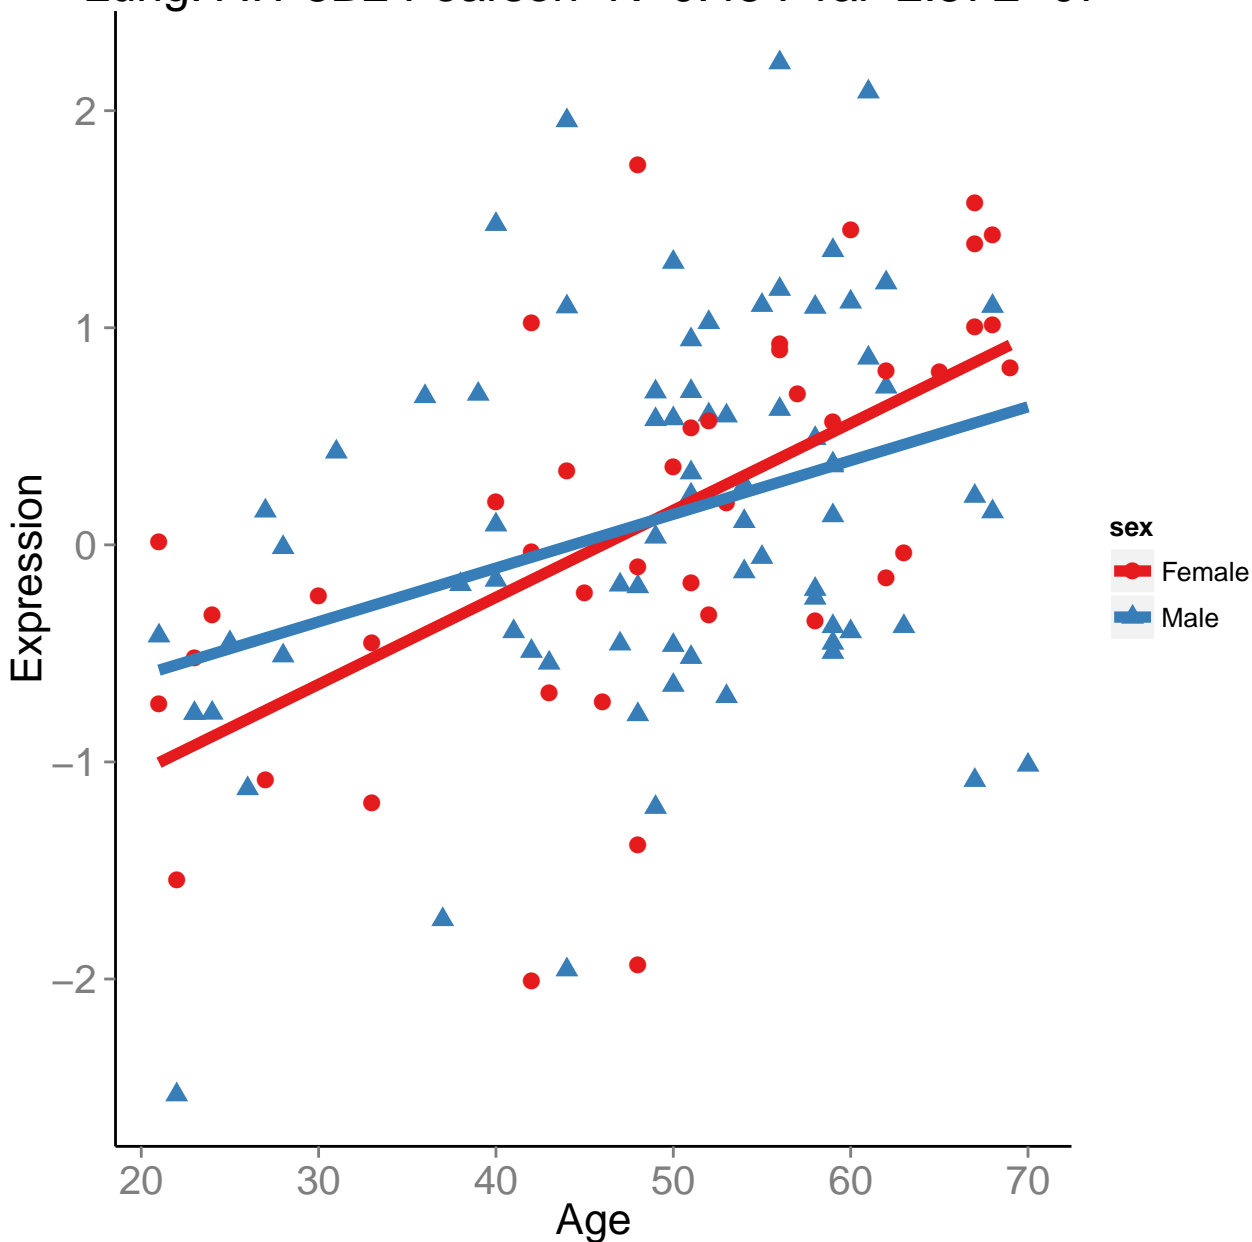



Lung: PDGFD Pearson-R=0.45 Pval=3.41E-07

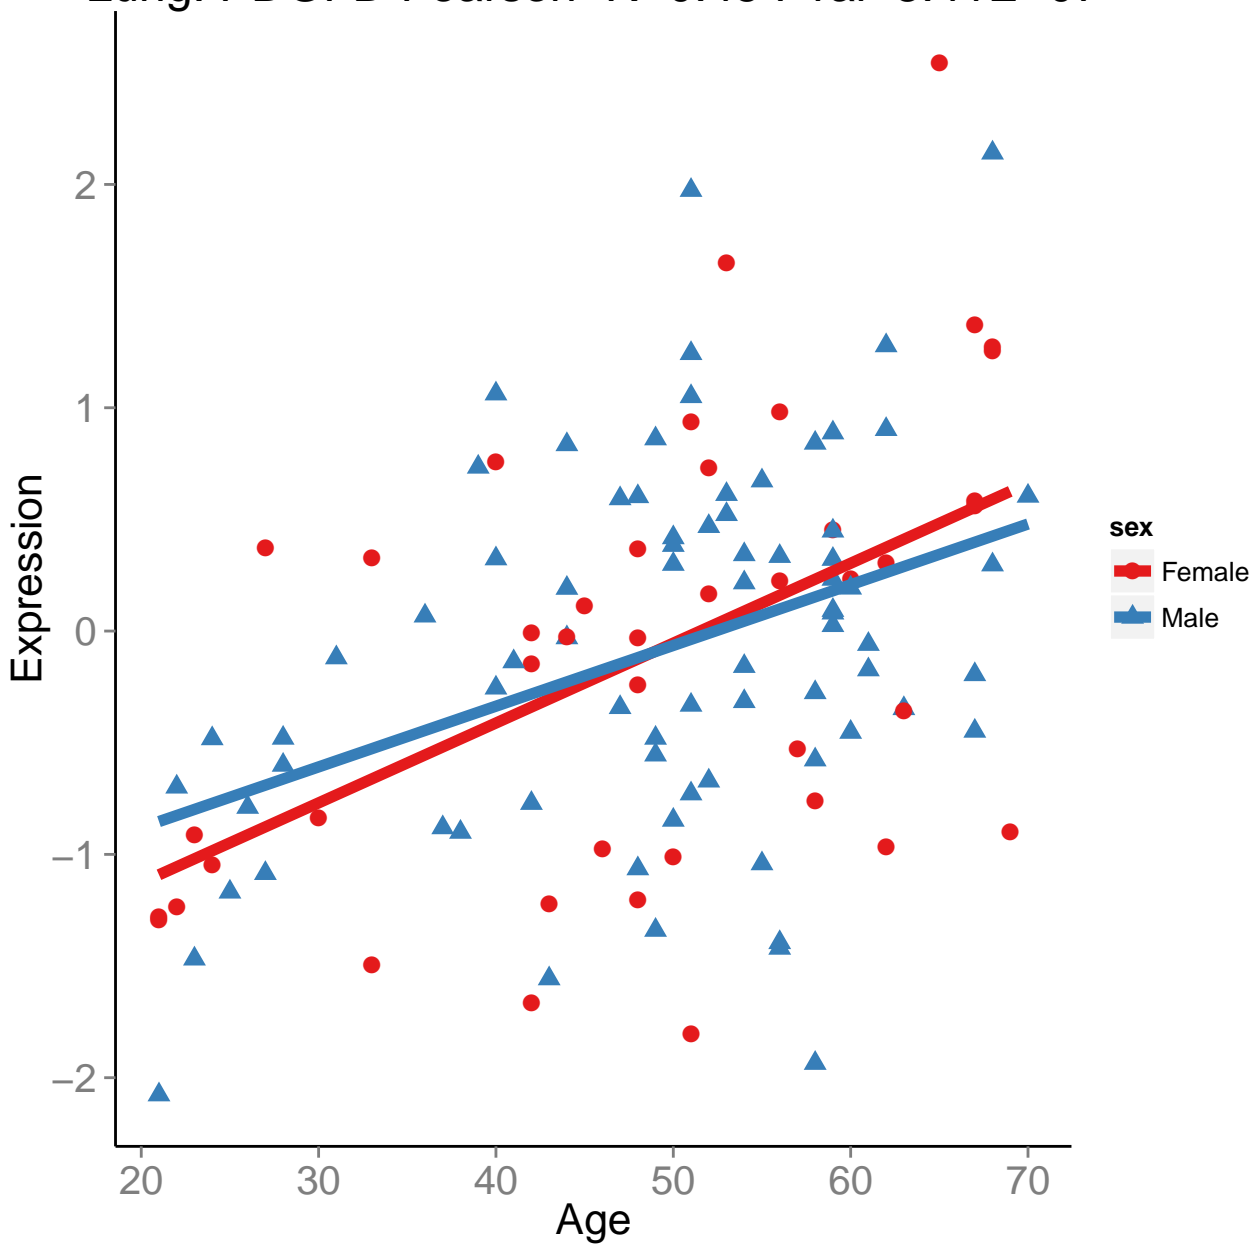

Lung: CCNJL Pearson-R=-0.44 Pval=4.06E-07

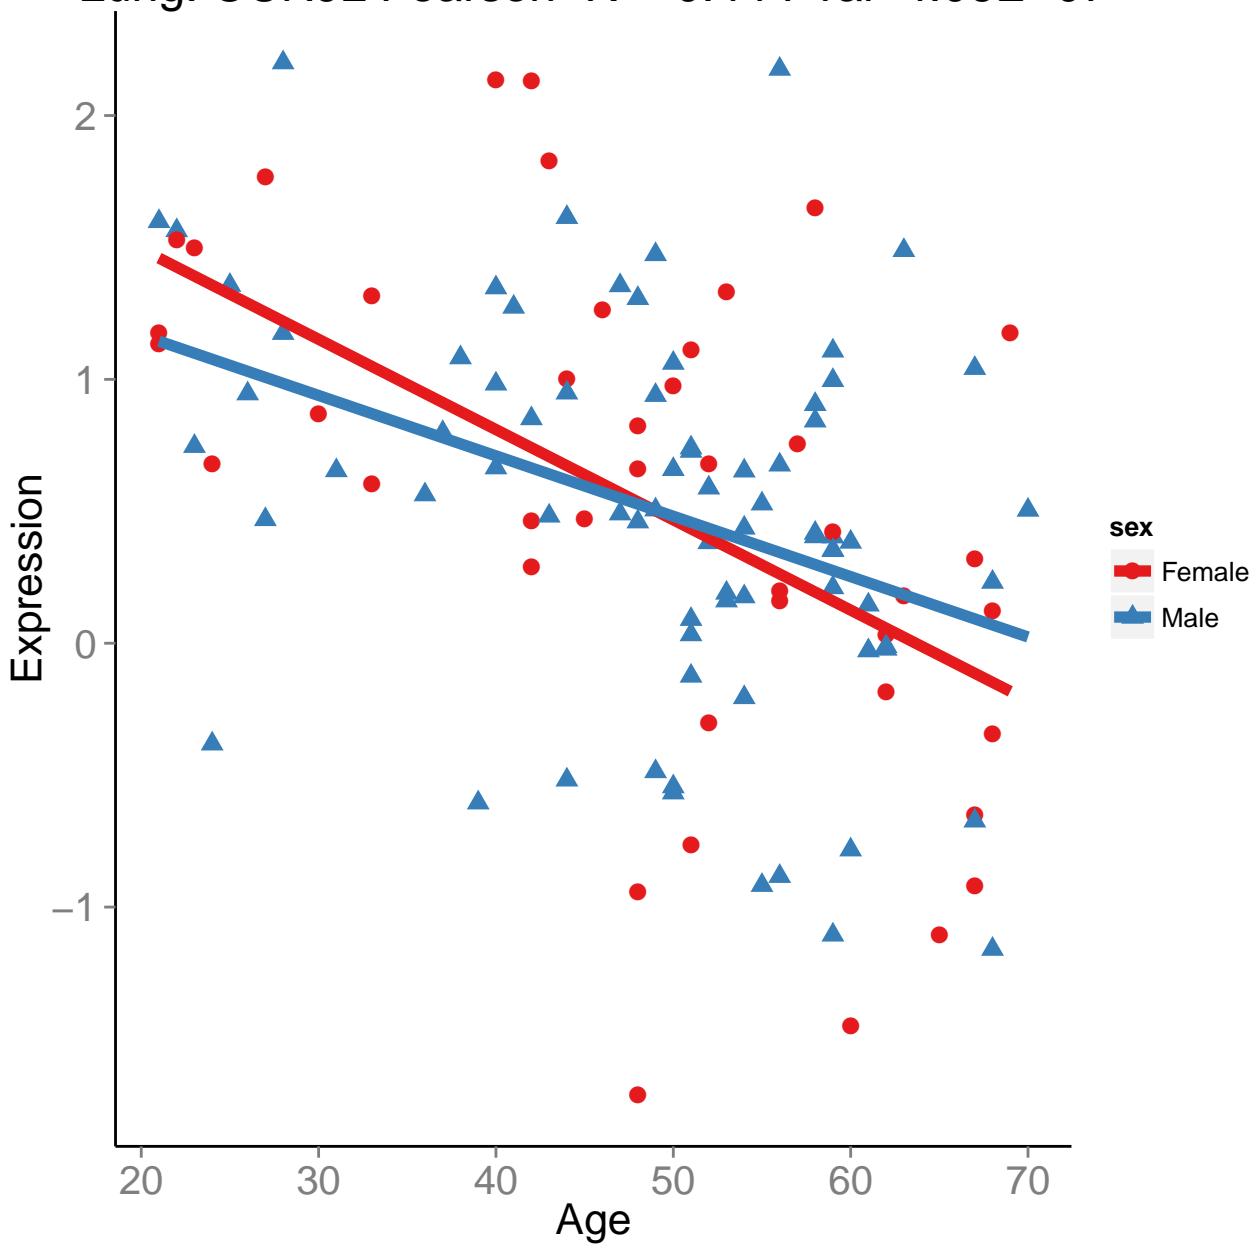

Lung: AHCYL2 Pearson-R=-0.44 Pval=4.07E-07

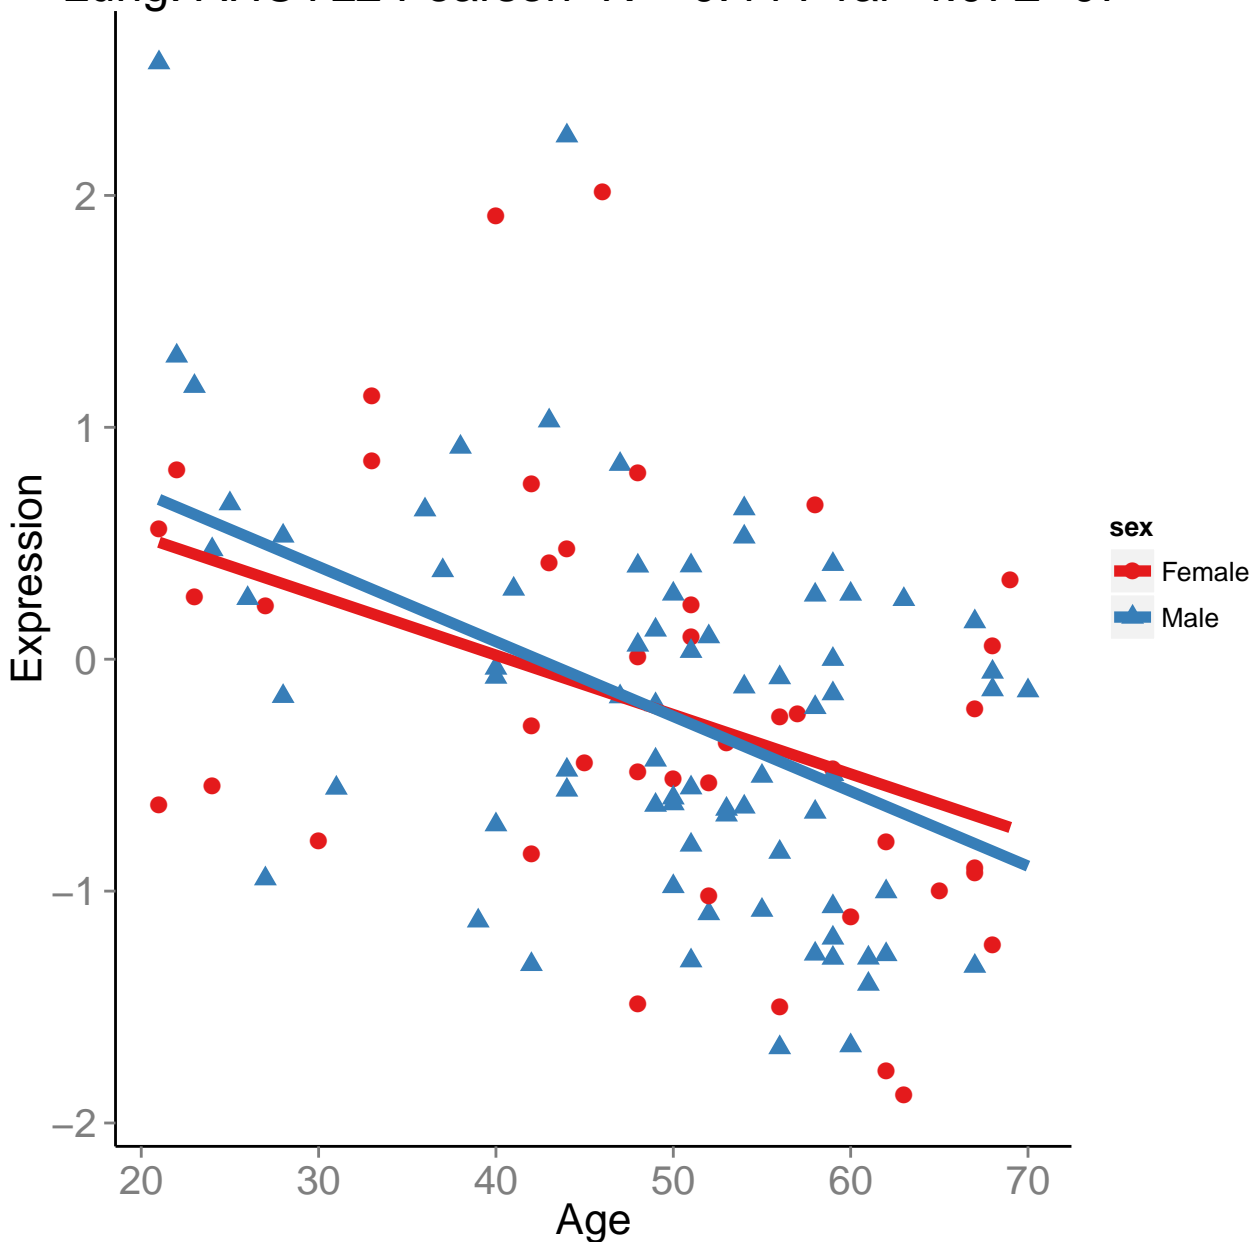

Lung: SERPING1 Pearson-R=0.44 Pval=4.43E-07

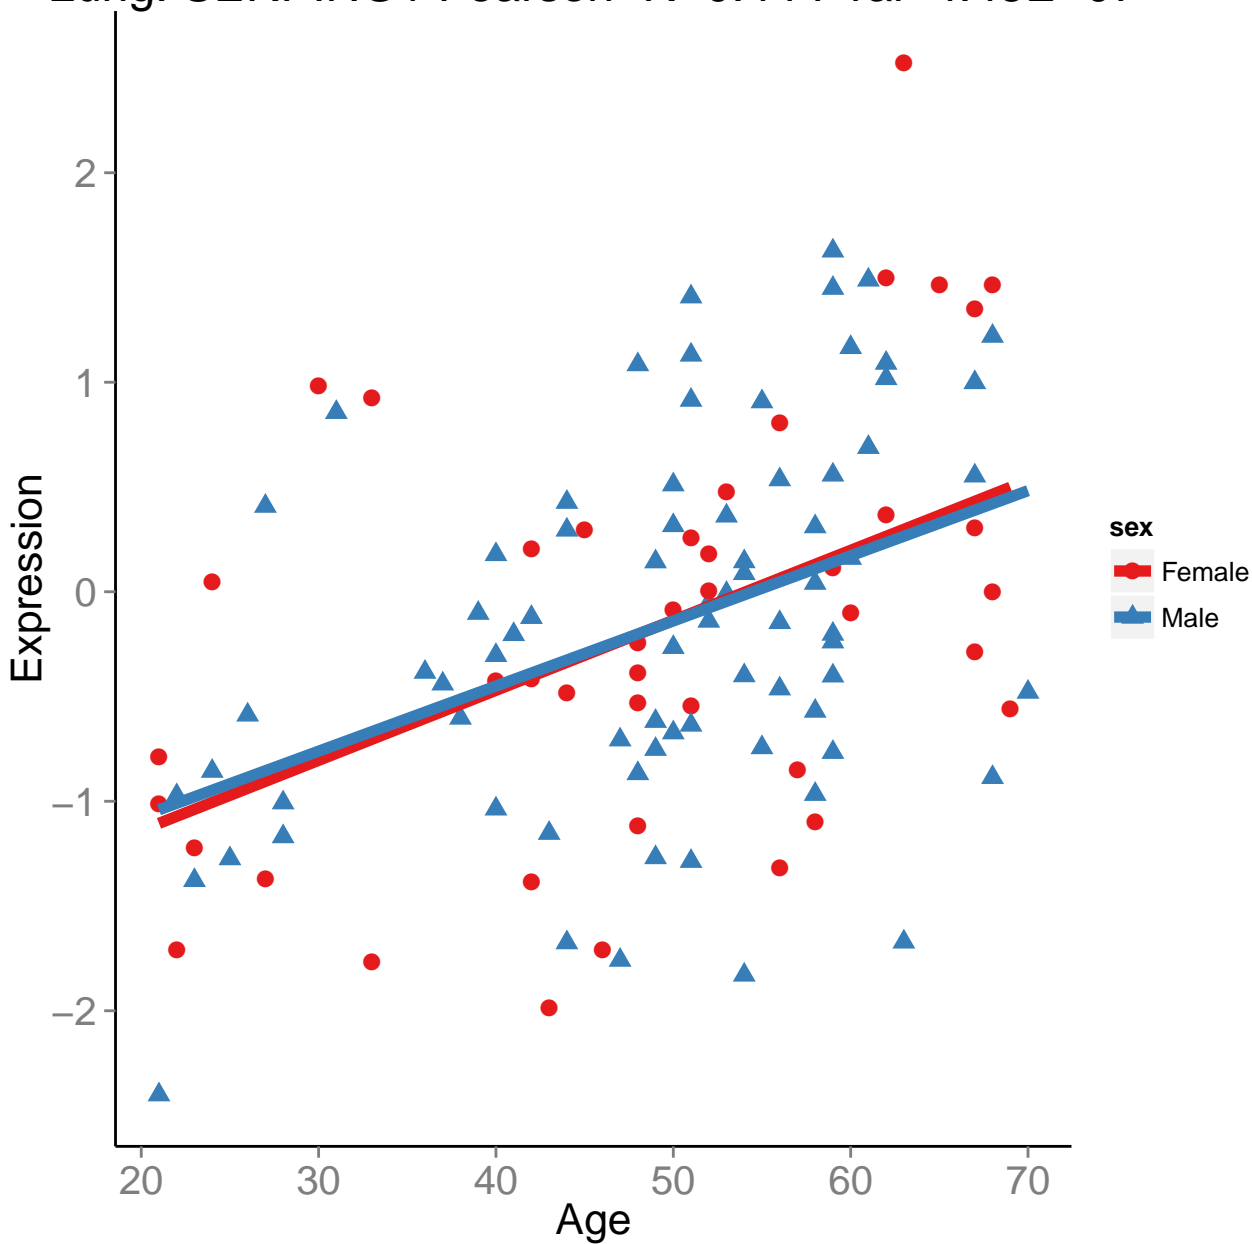

Lung: ACOXL Pearson-R=-0.45 Pval=3.70E-07

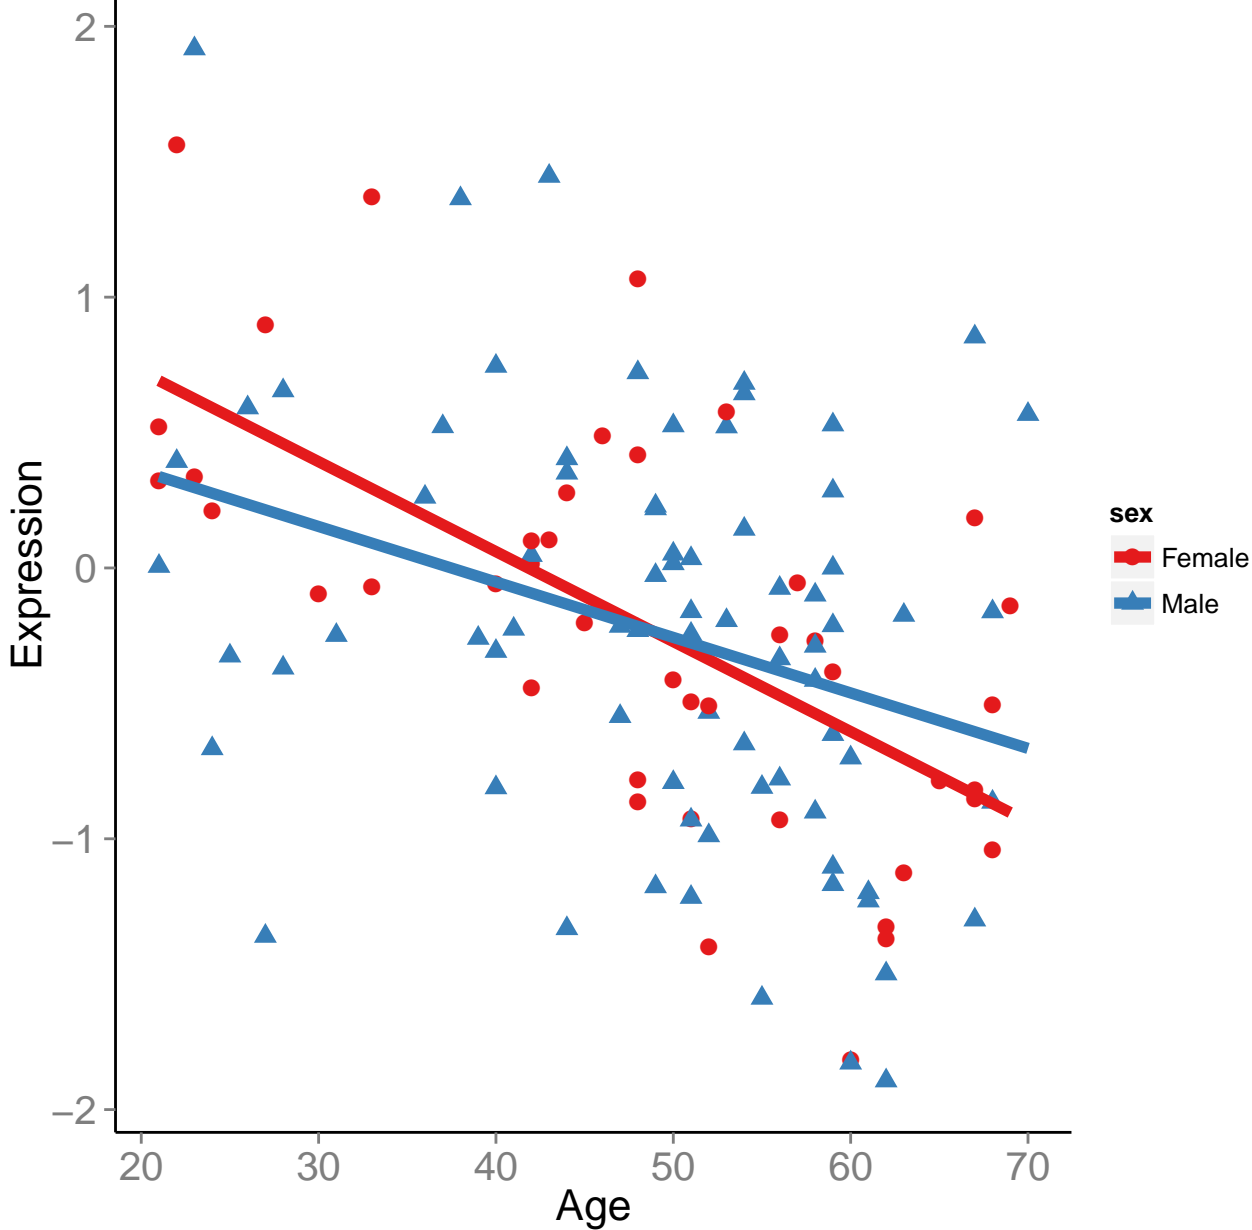

Lung: CSF2 Pearson-R=-0.44 Pval=4.22E-07

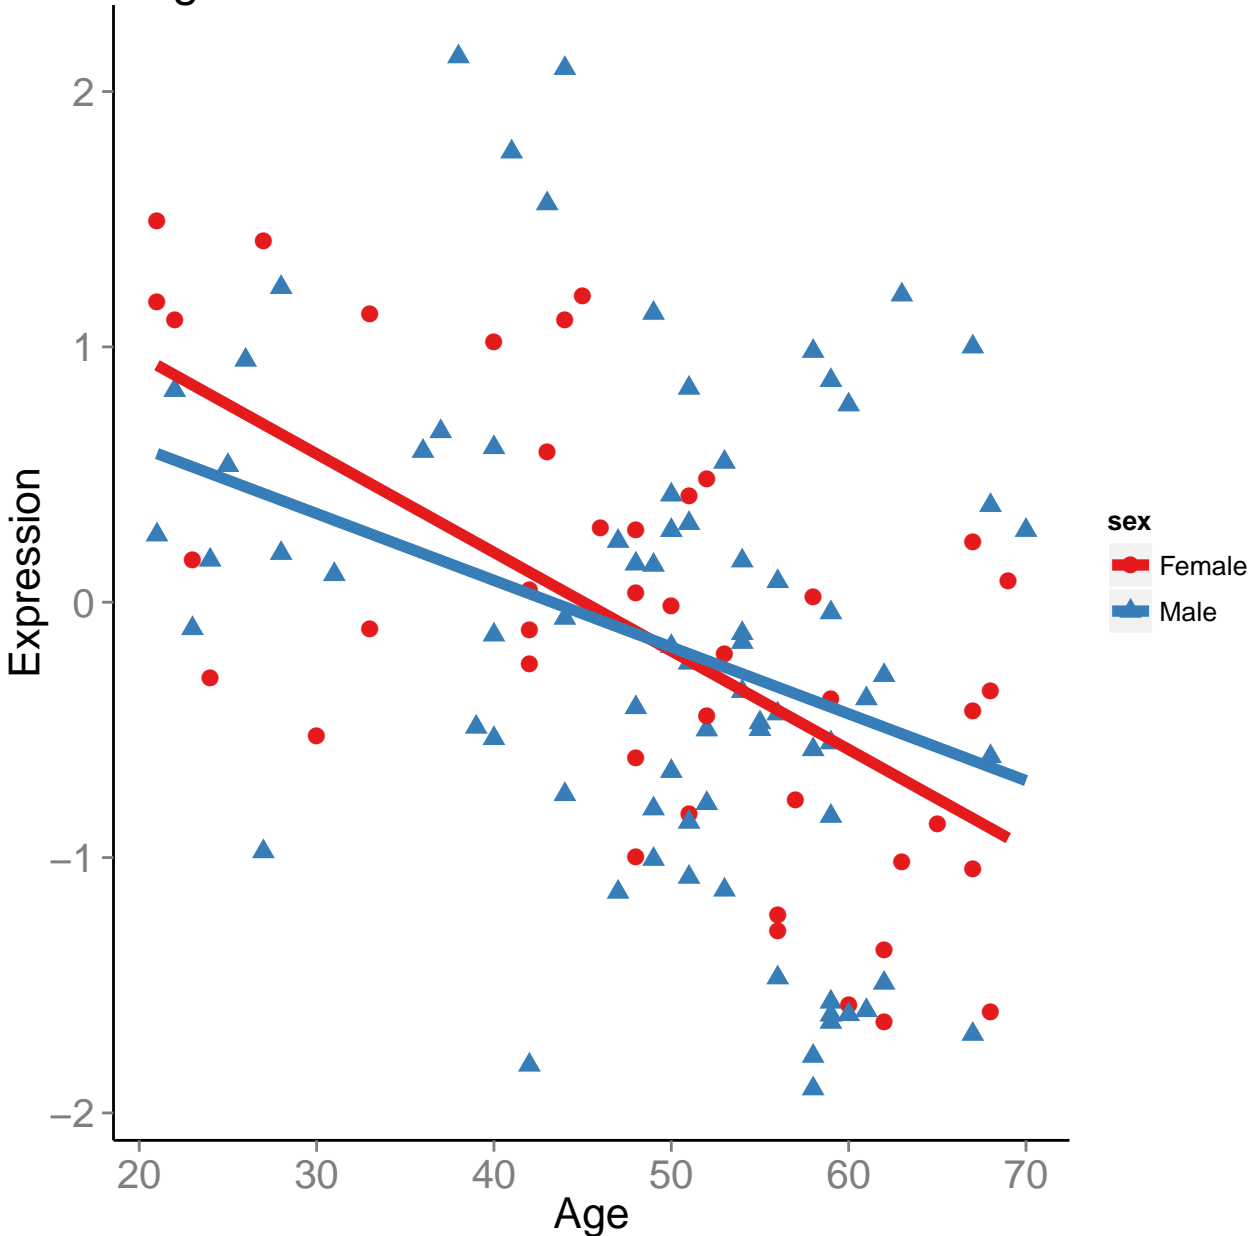

Lung: FOXO3 Pearson-R=0.44 Pval=5.34E-07

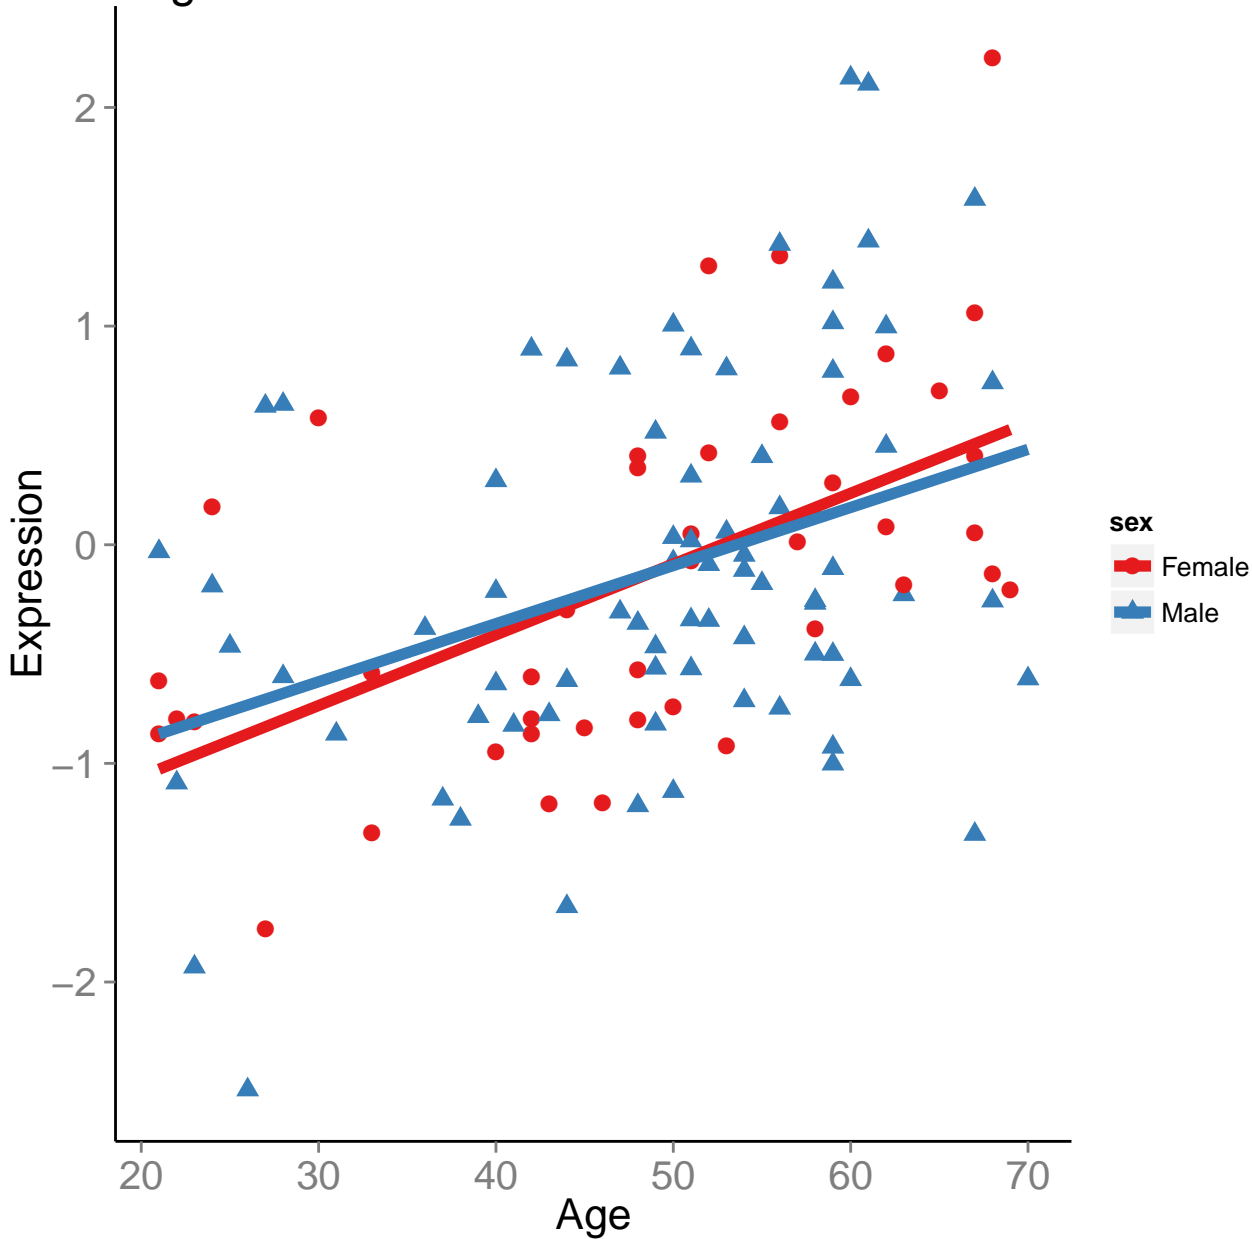

Lung: FRZB Pearson-R=0.44 Pval=5.98E-07

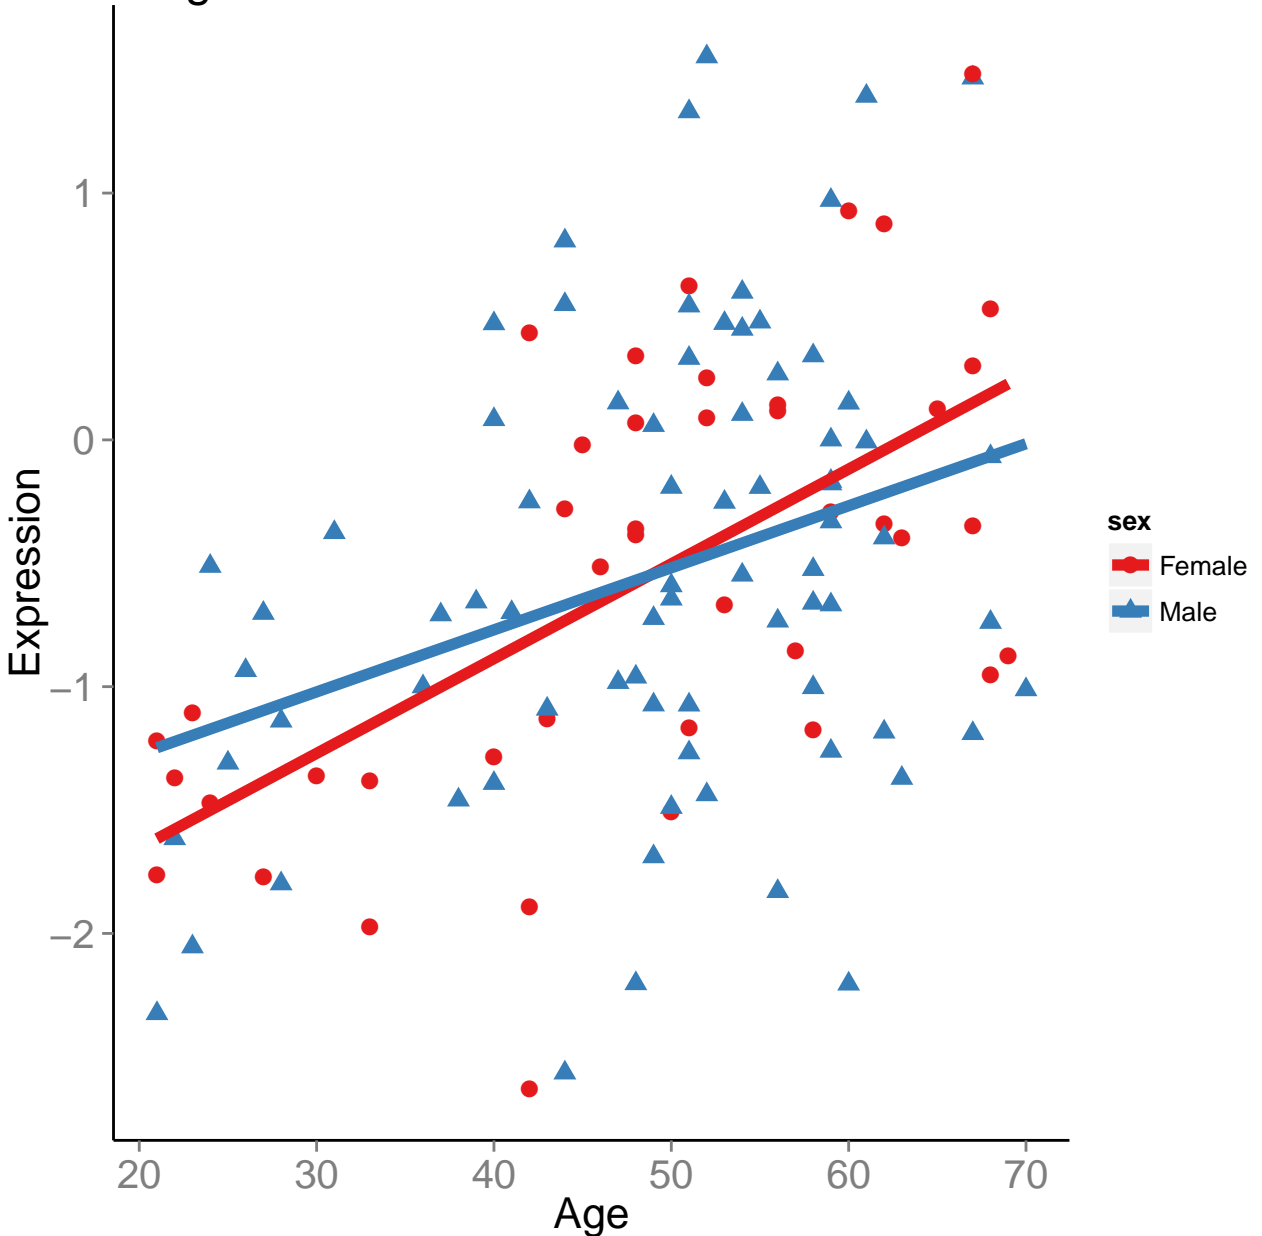



Lung: CHCHD7 Pearson-R=-0.44 Pval=7.52E-07

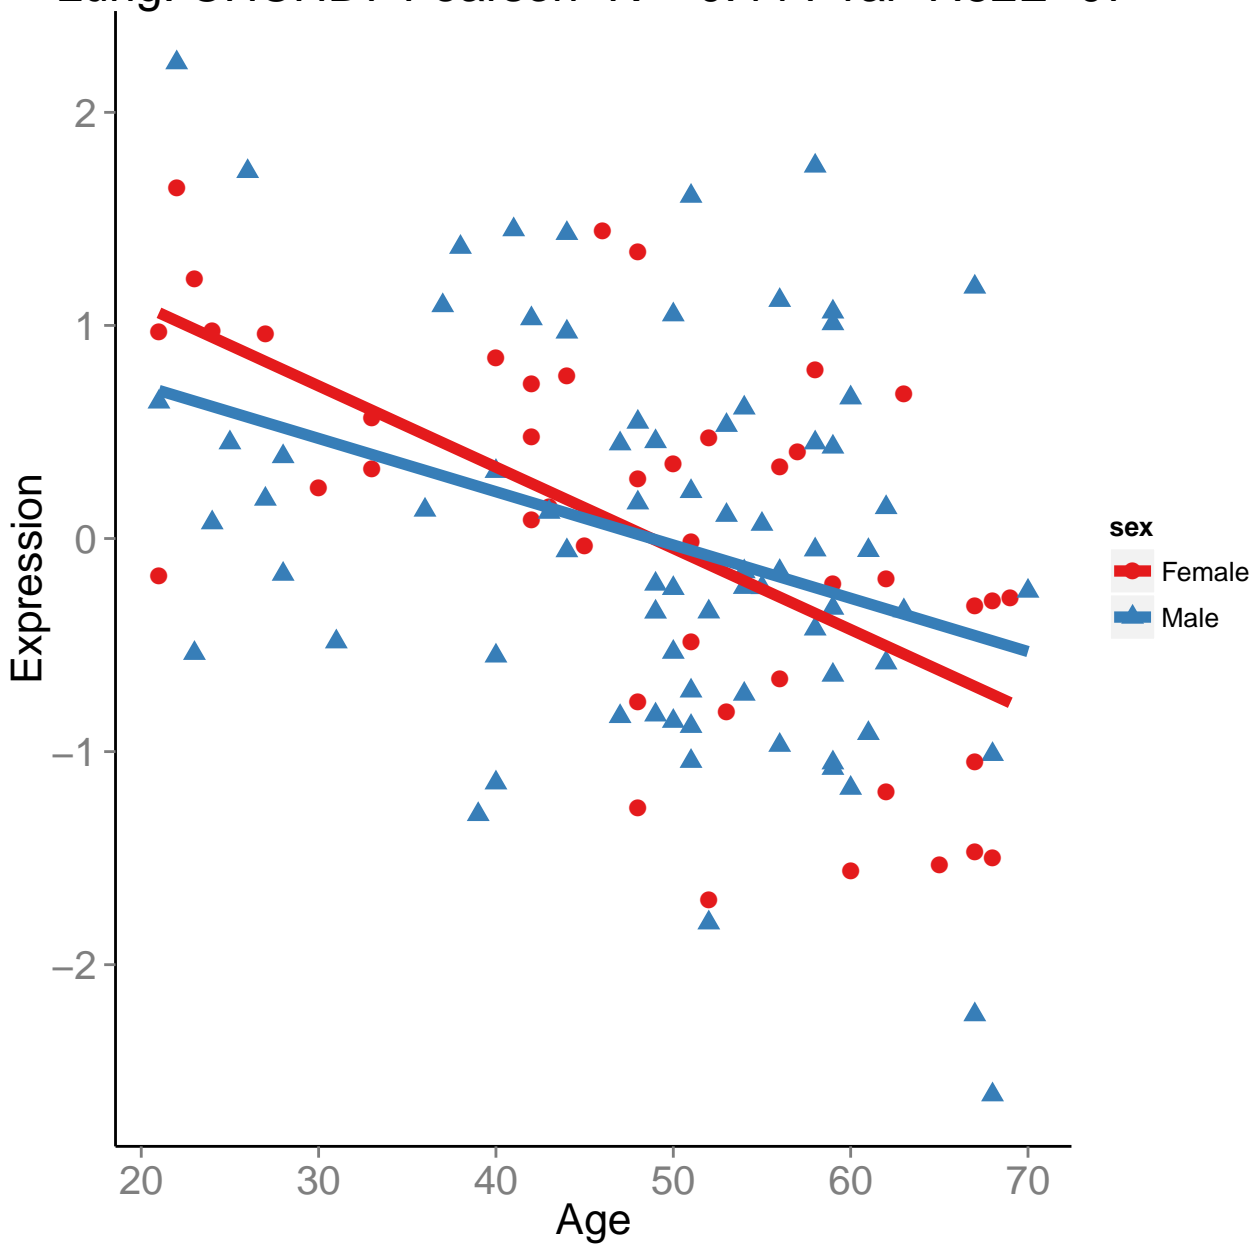

Lung: AC009475.2 Pearson-R=0.44 Pval=7.28E-07

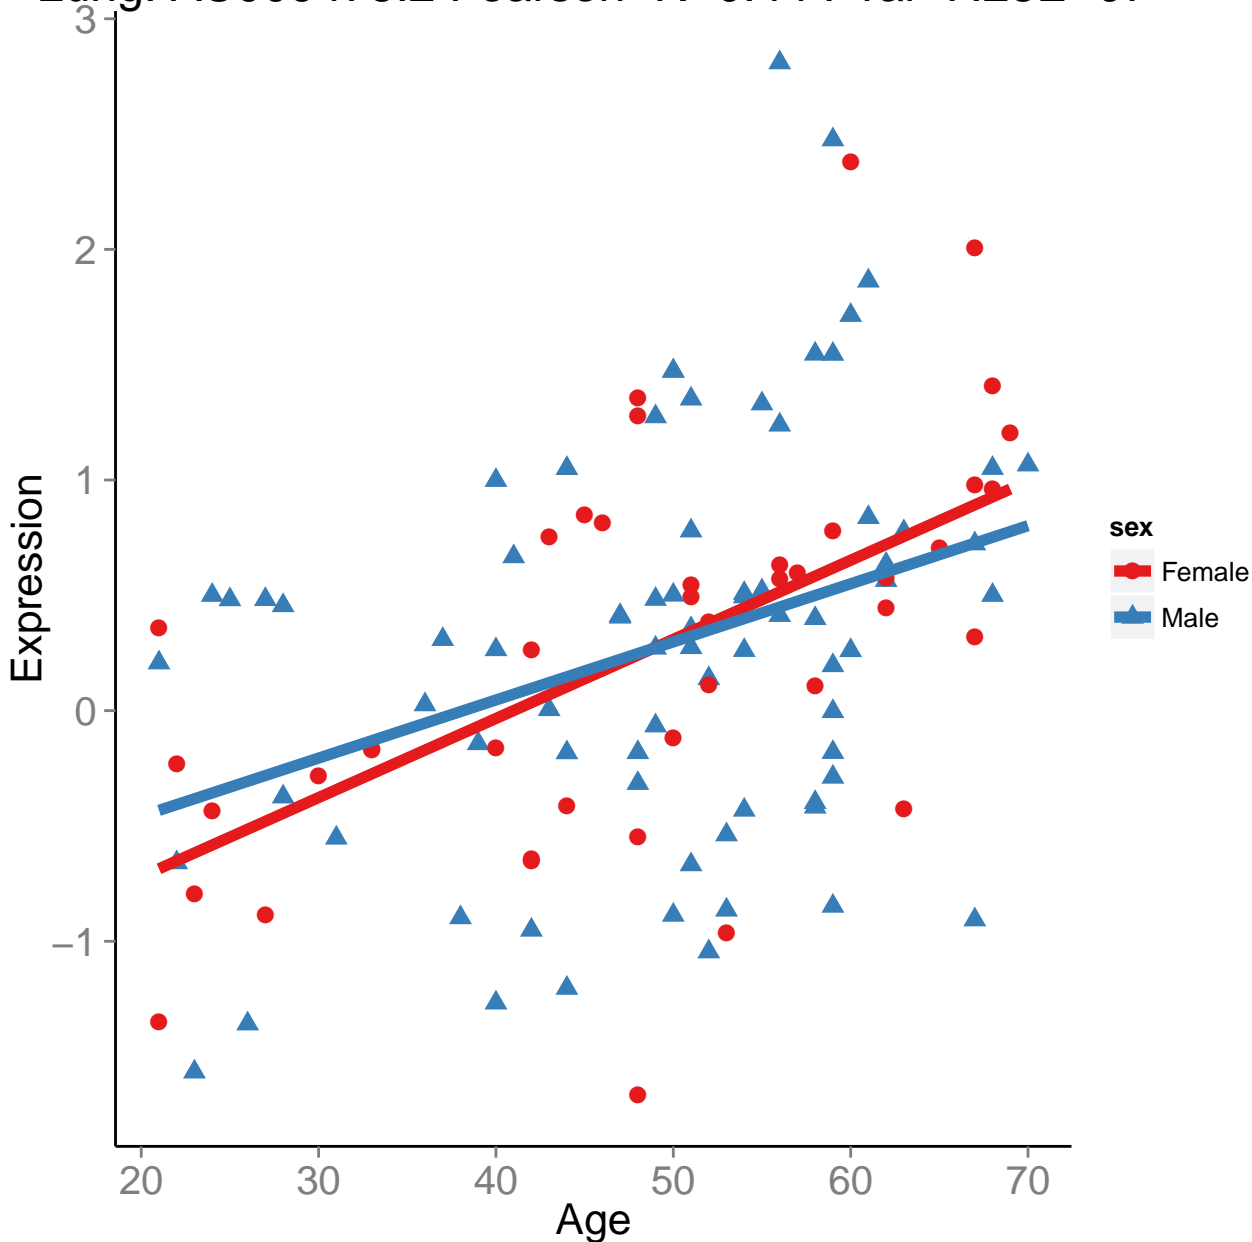

Lung: MFGE8 Pearson-R=0.43 Pval=9.15E-07

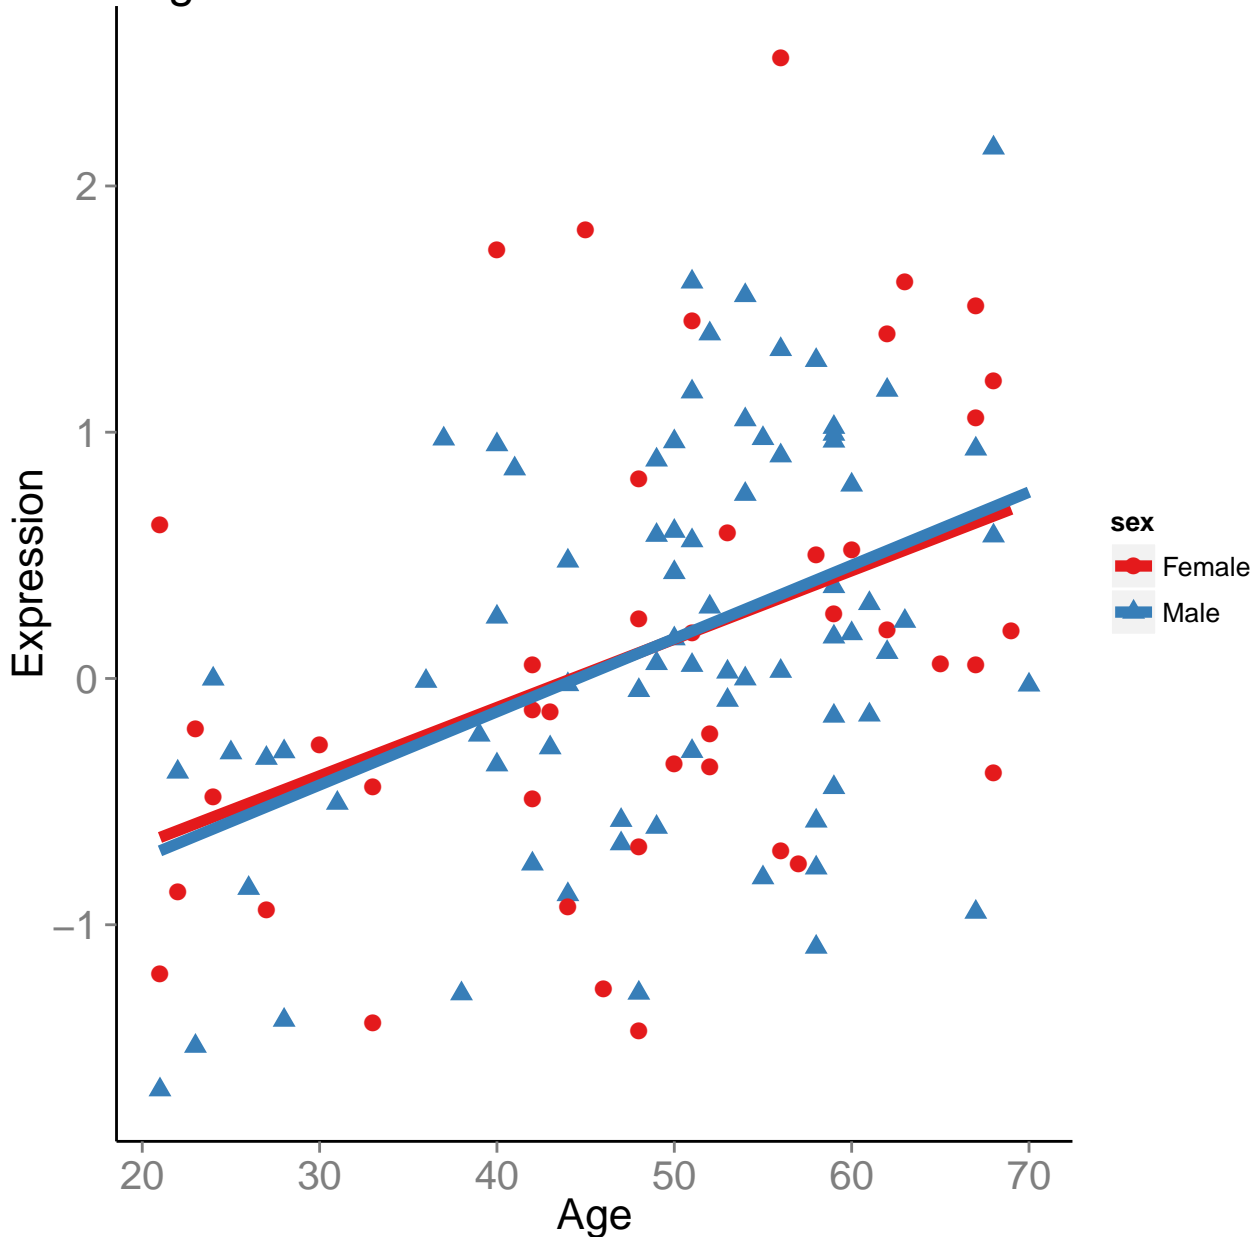

Lung: WISP2 Pearson-R=0.43 Pval=9.68E-07

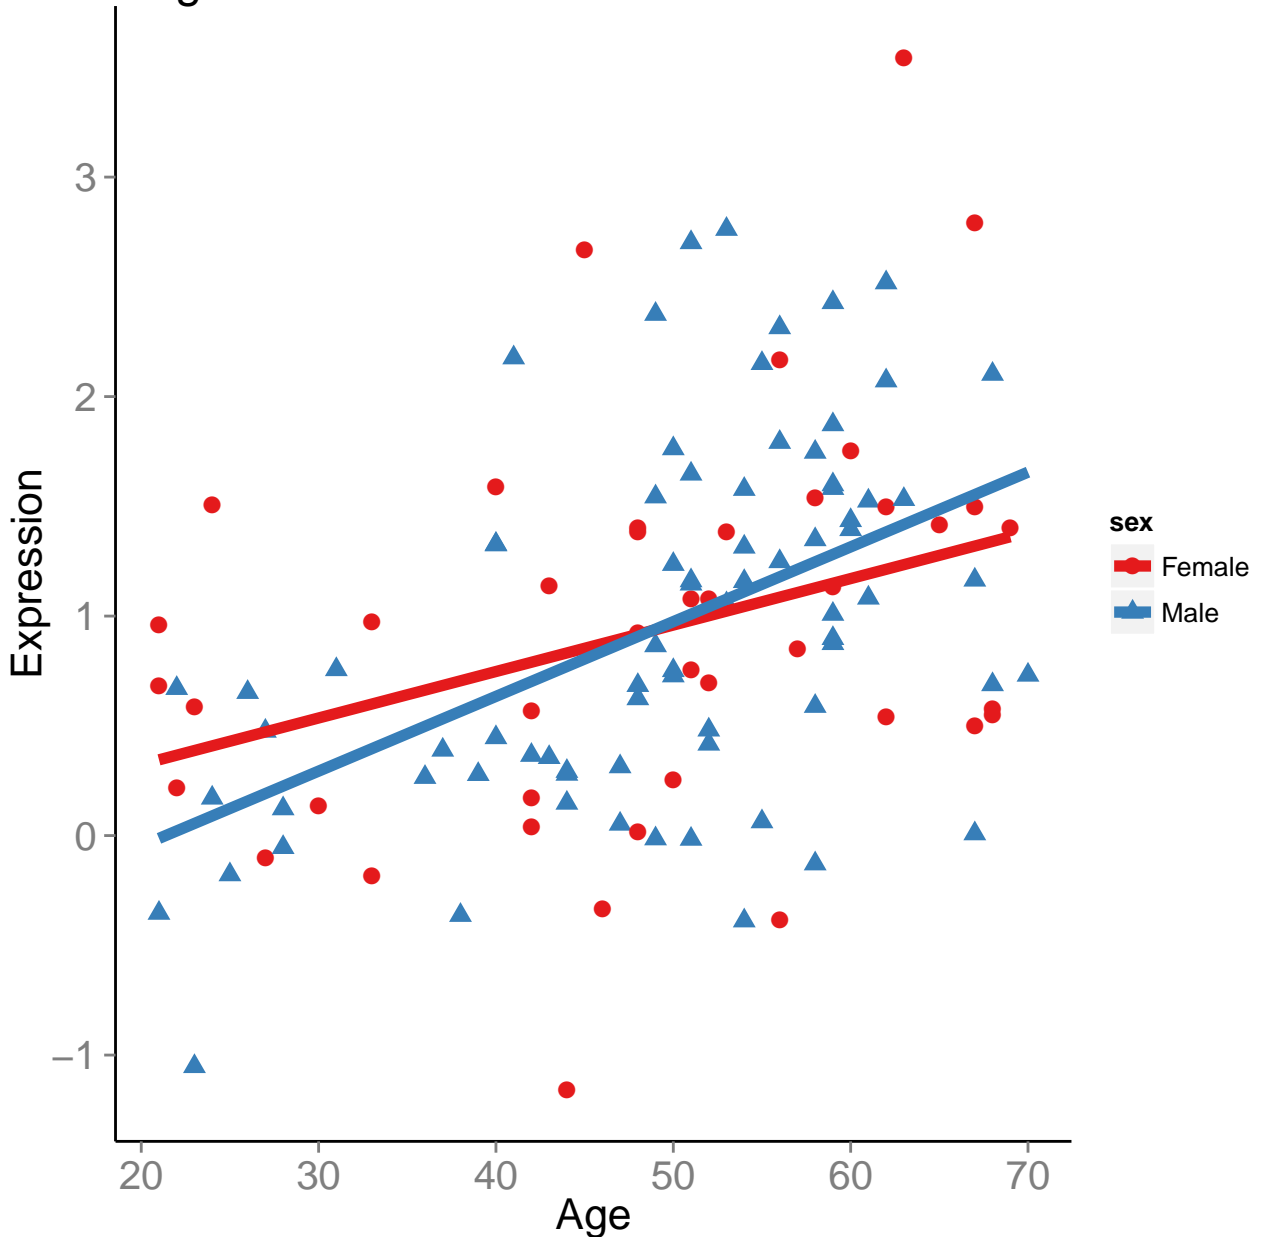

Lung: TMEM130 Pearson-R=0.43 Pval=1.04E-06

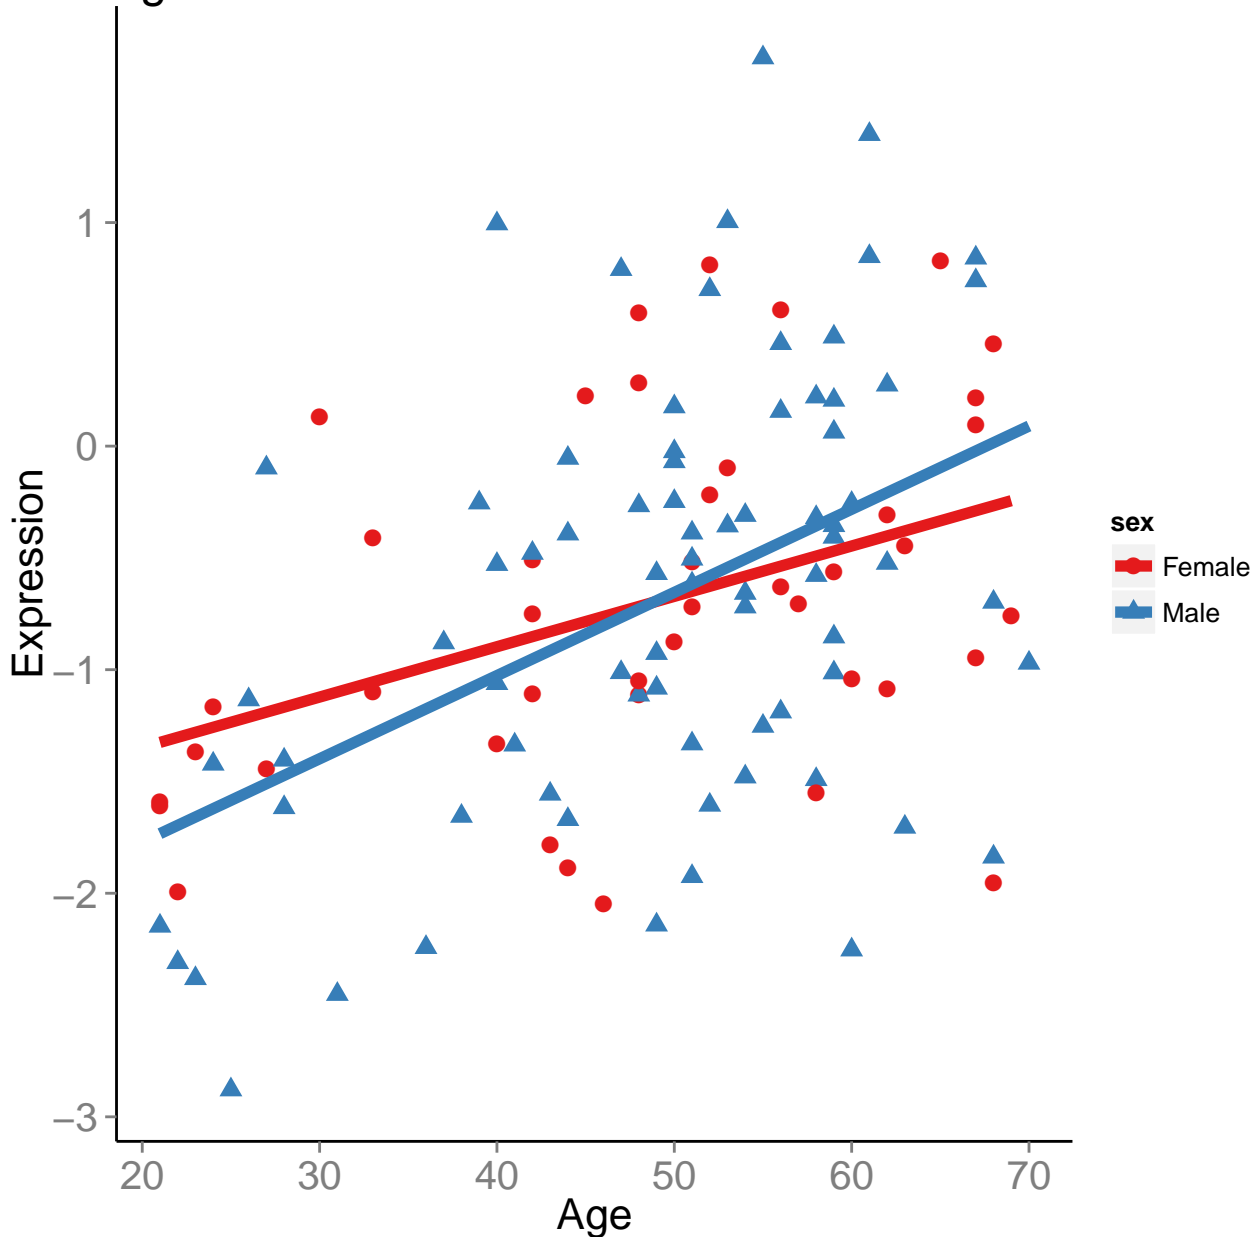

Lung: ZNF710 Pearson-R=-0.43 Pval=1.22E-06

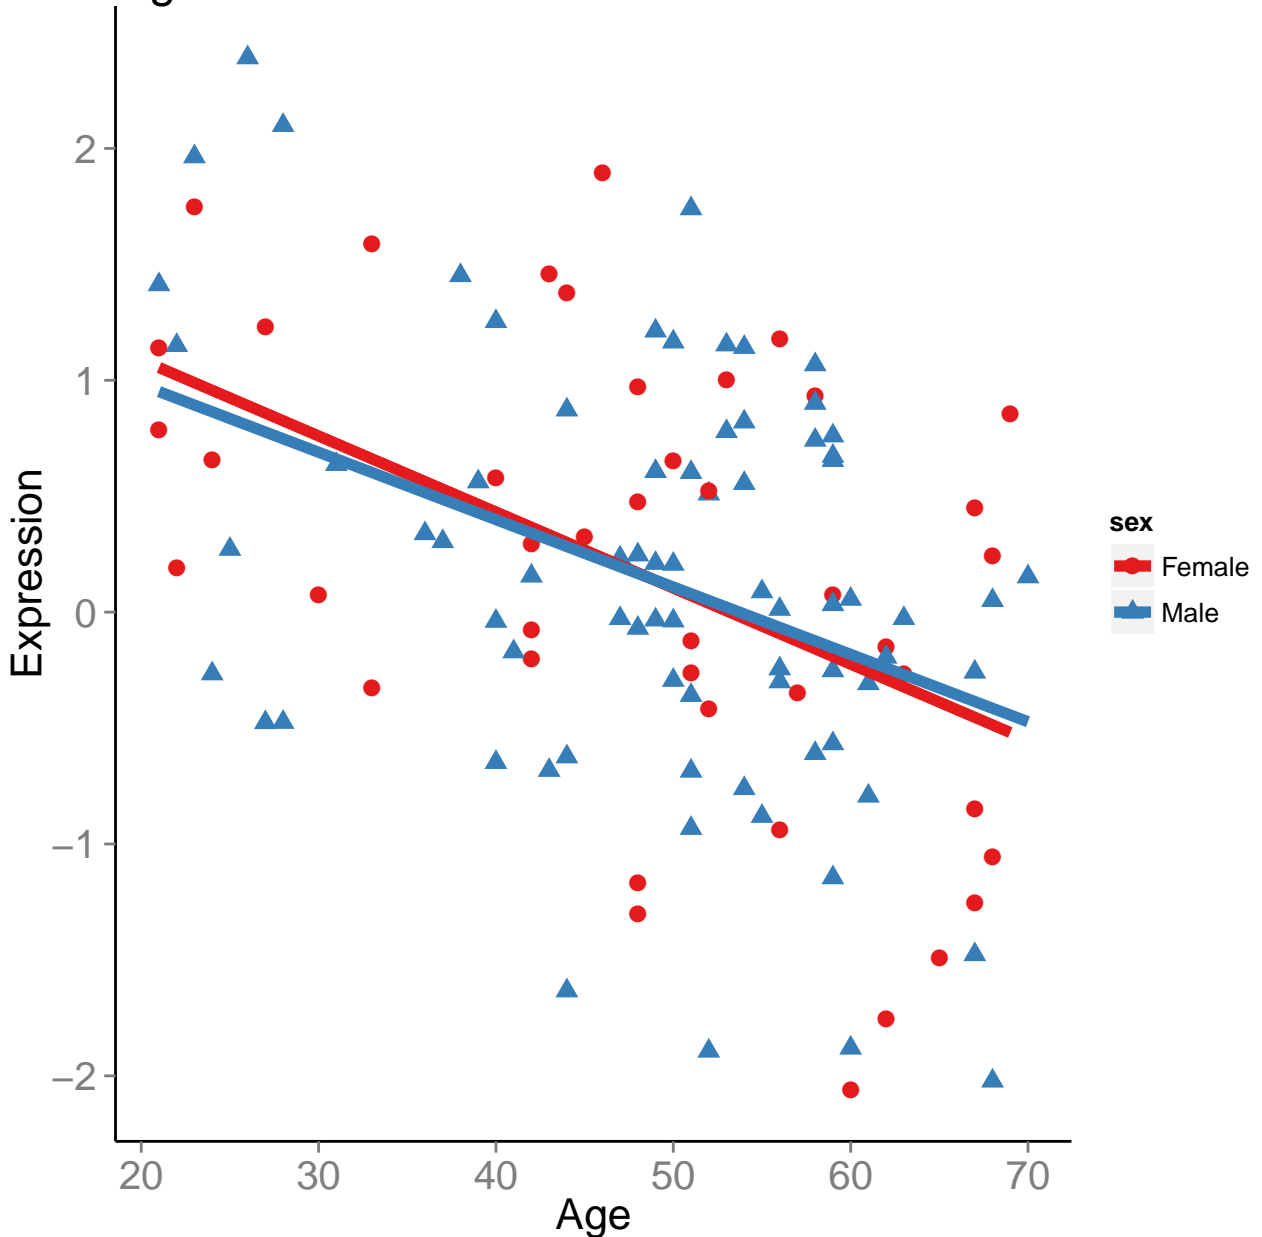

Lung: USP40 Pearson-R=-0.43 Pval=1.25E-06

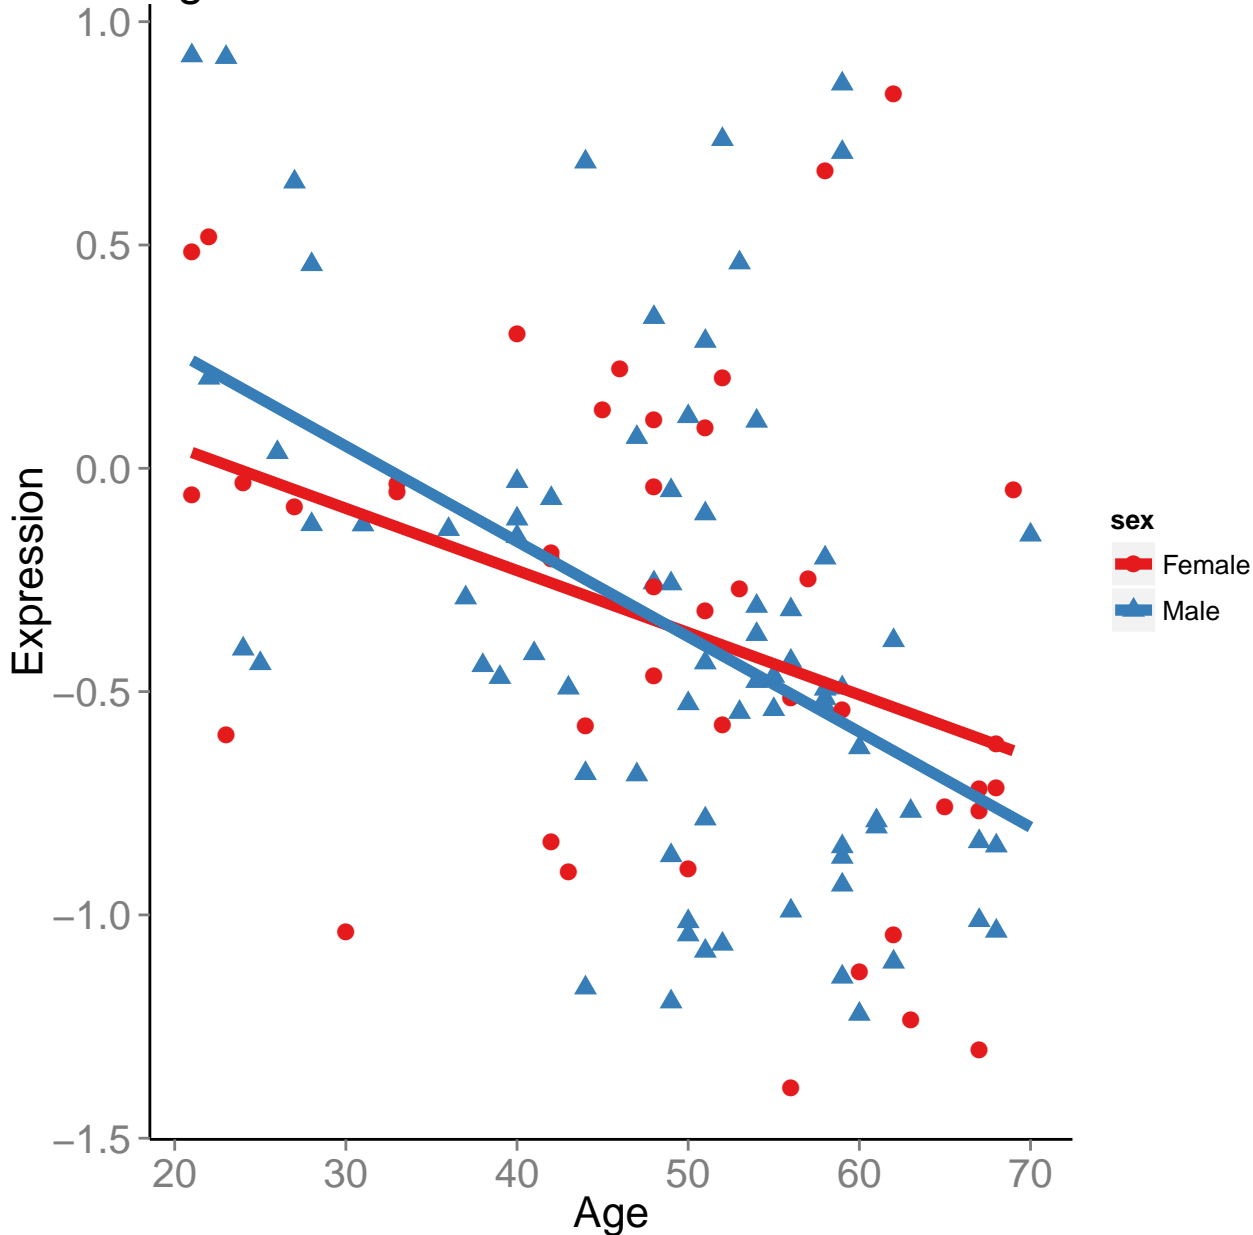

Lung: MIR17HG Pearson-R=-0.43 Pval=1.33E-06

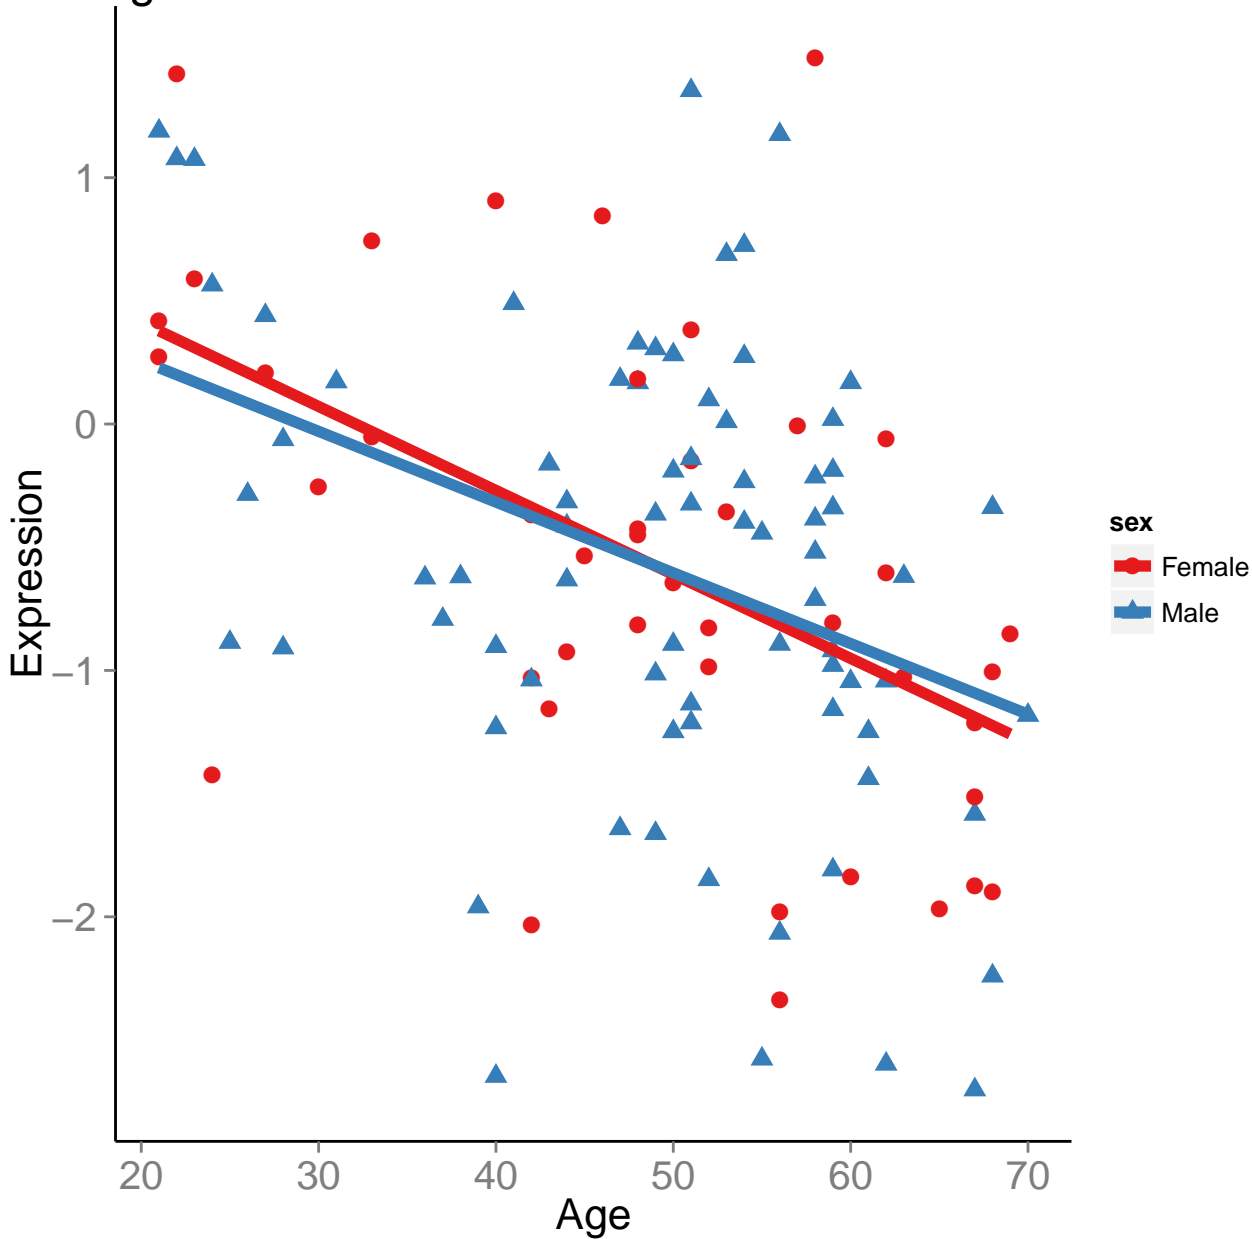



Lung: PCDHB2 Pearson-R=0.42 Pval=1.69E-06

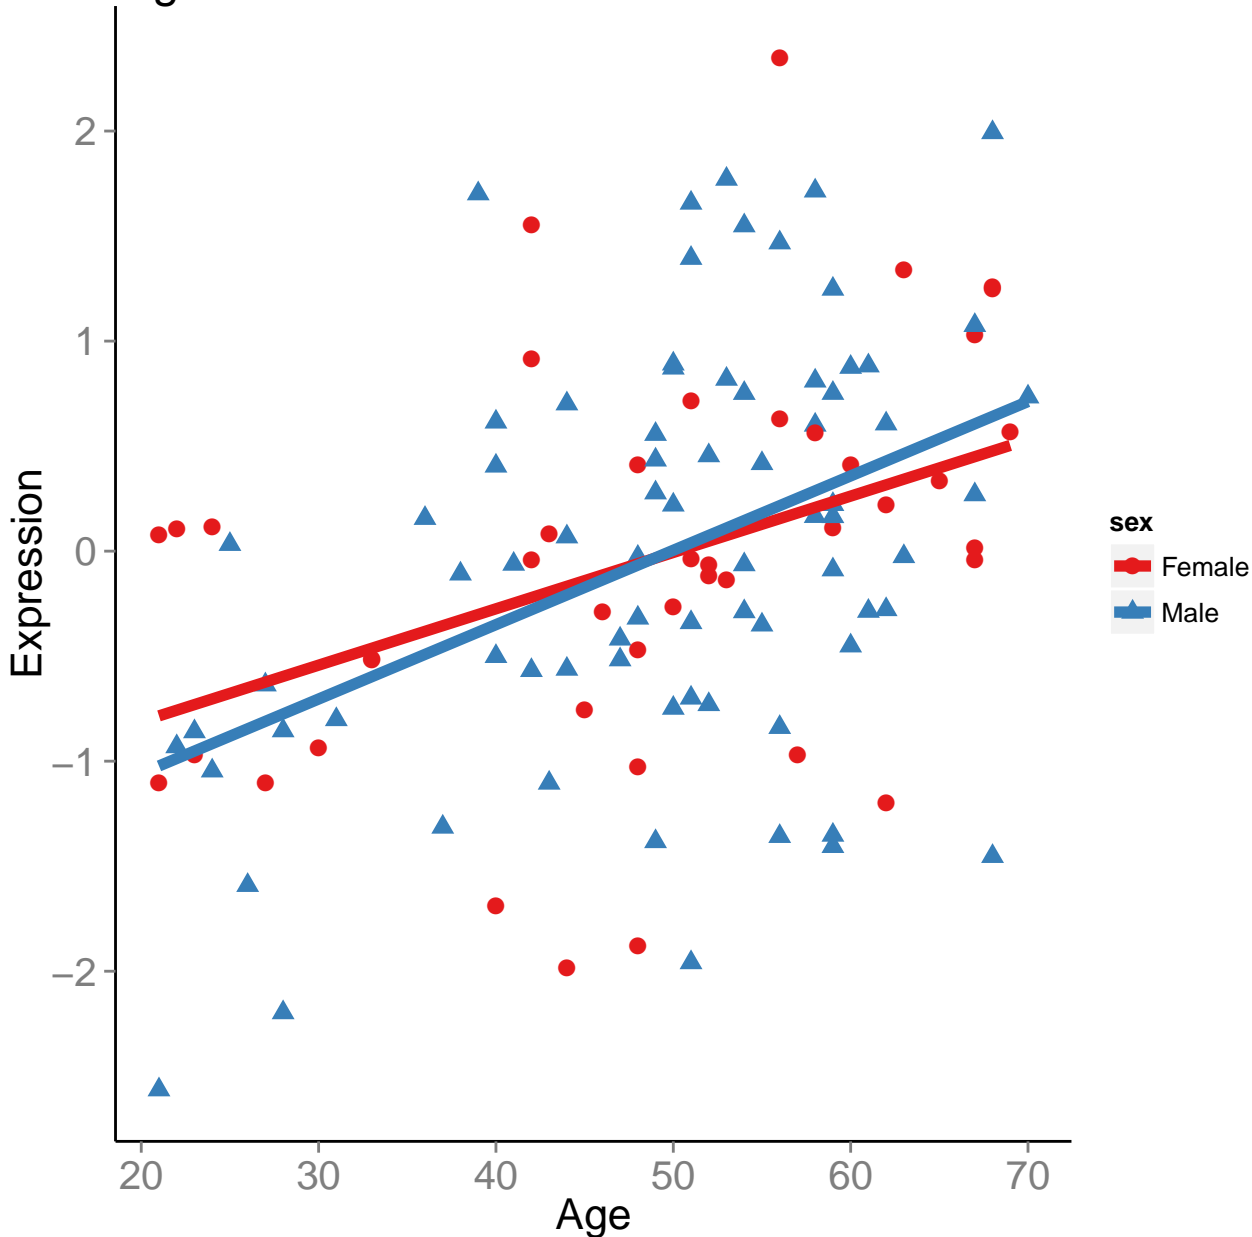

Lung: LSR Pearson-R=-0.42 Pval=1.65E-06

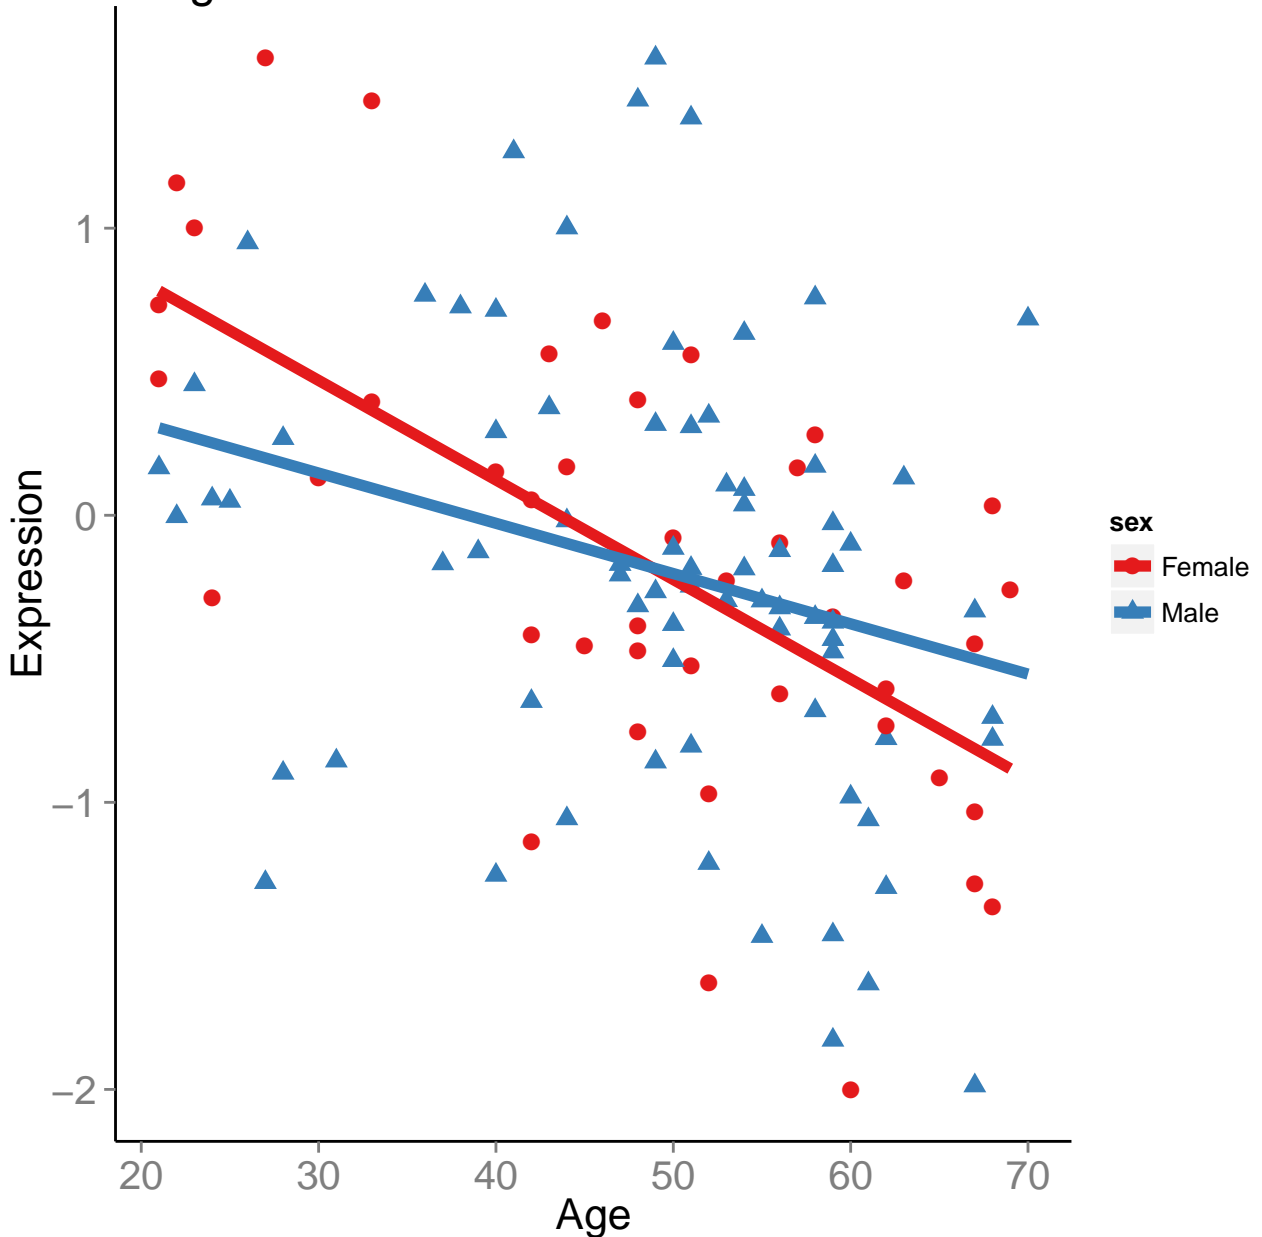

Lung: EFHD1 Pearson-R=0.42 Pval=1.62E-06

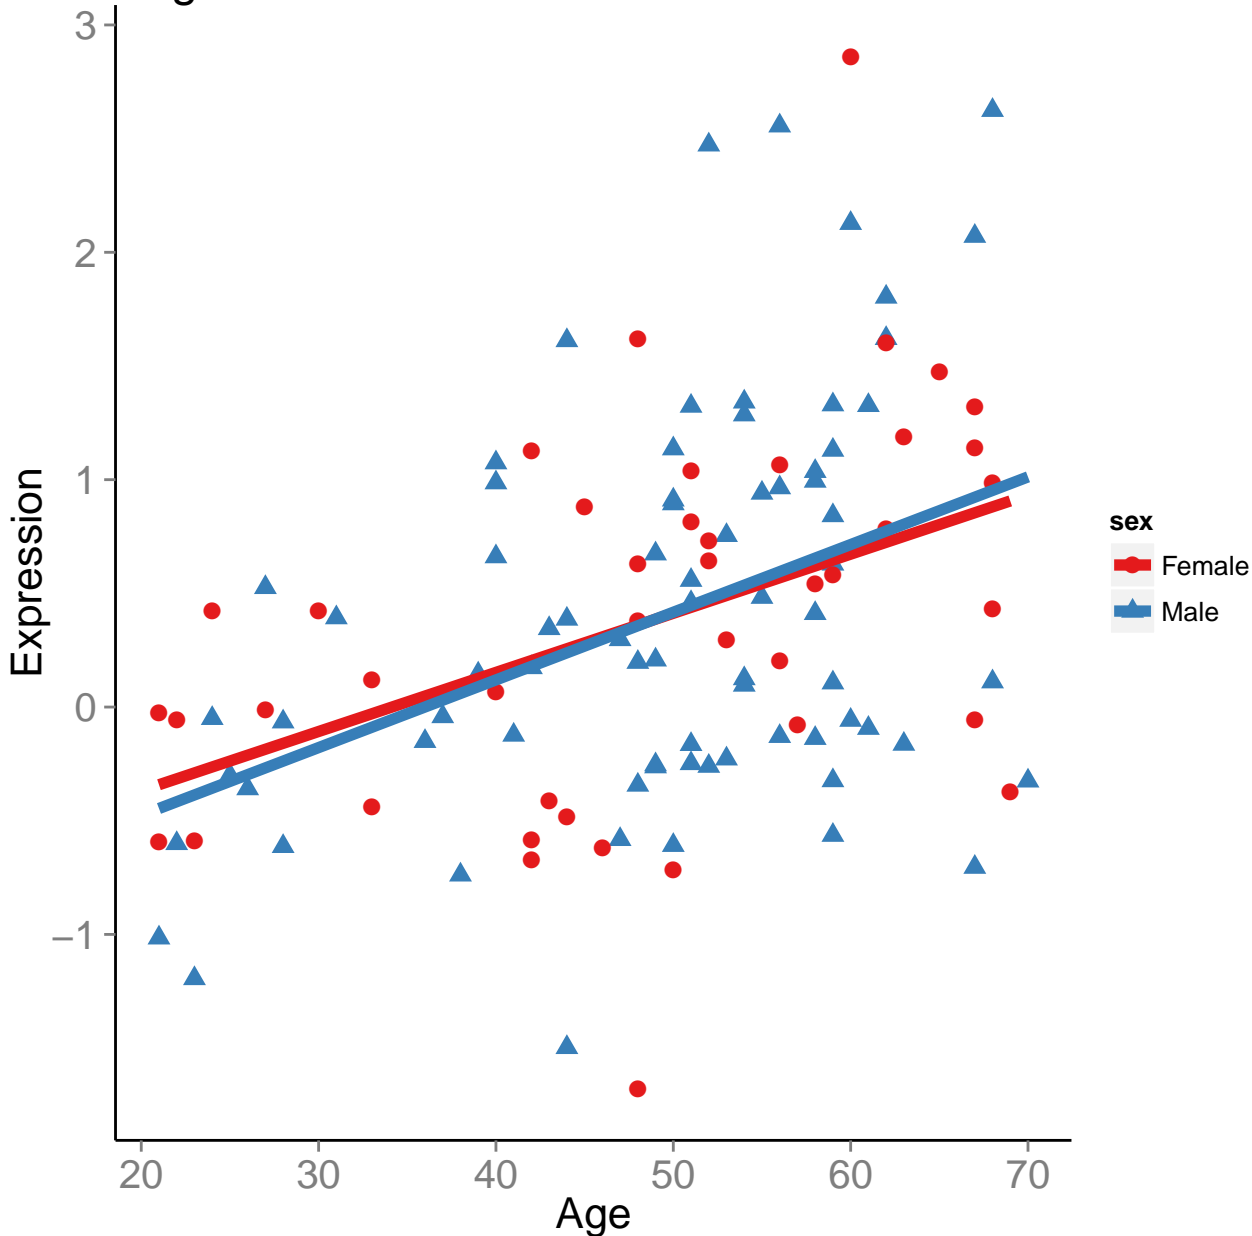

Lung: RP11-517C16.2 Pearson-R=-0.42 Pval=1.88E-06

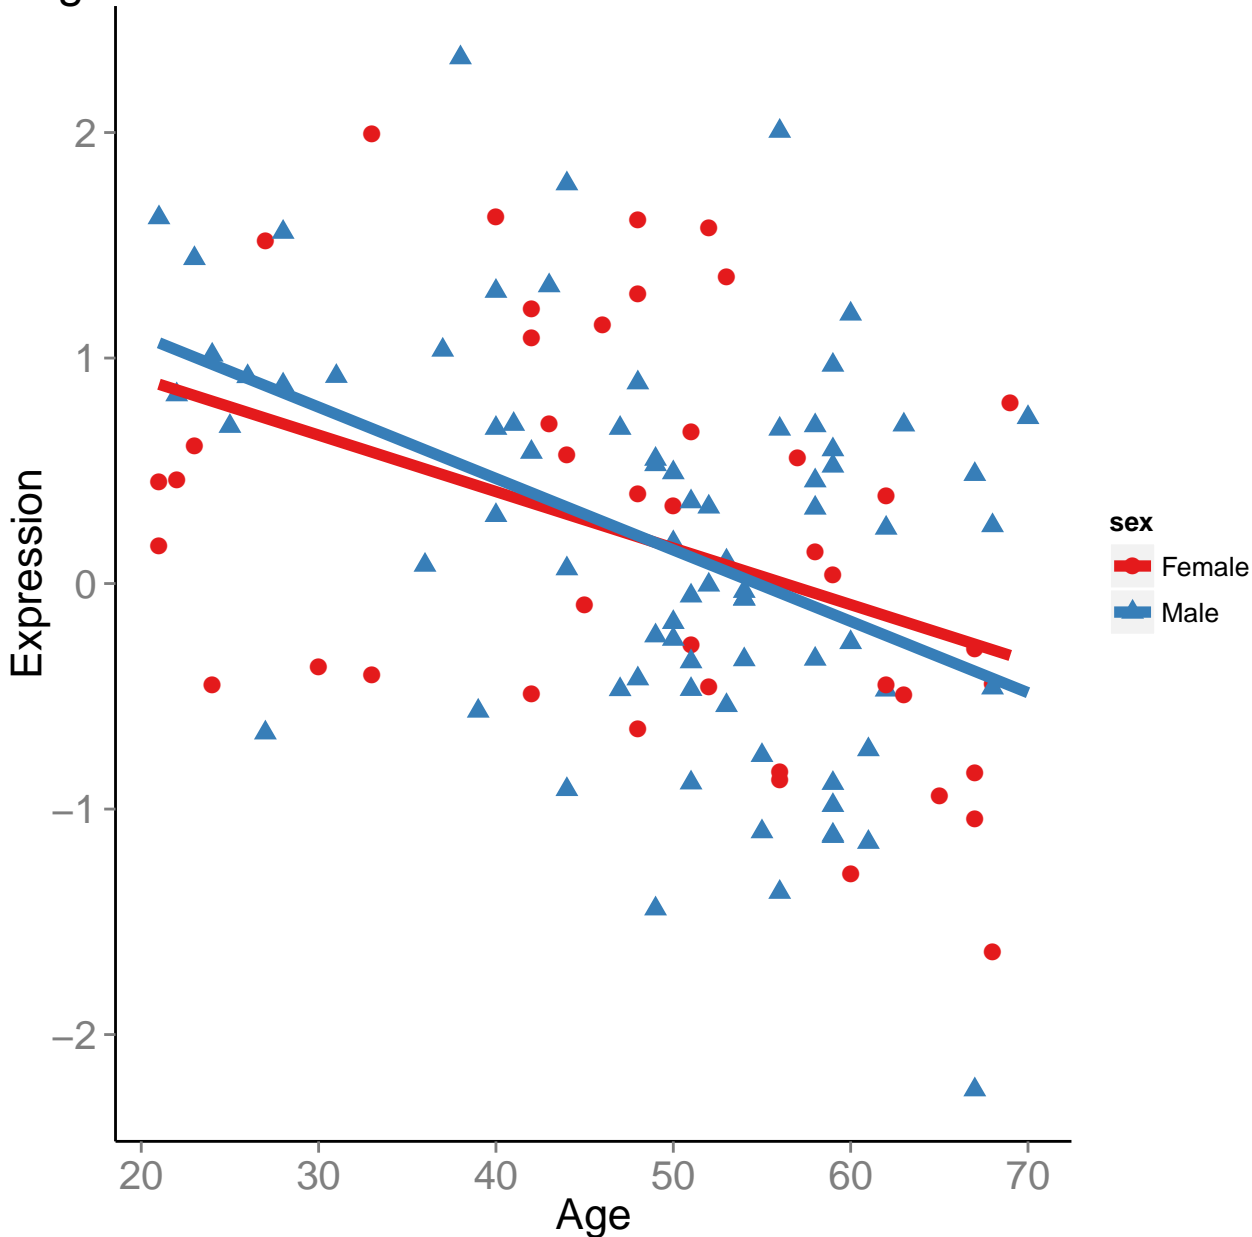

Lung: PDE1A Pearson-R=0.42 Pval=1.79E-06

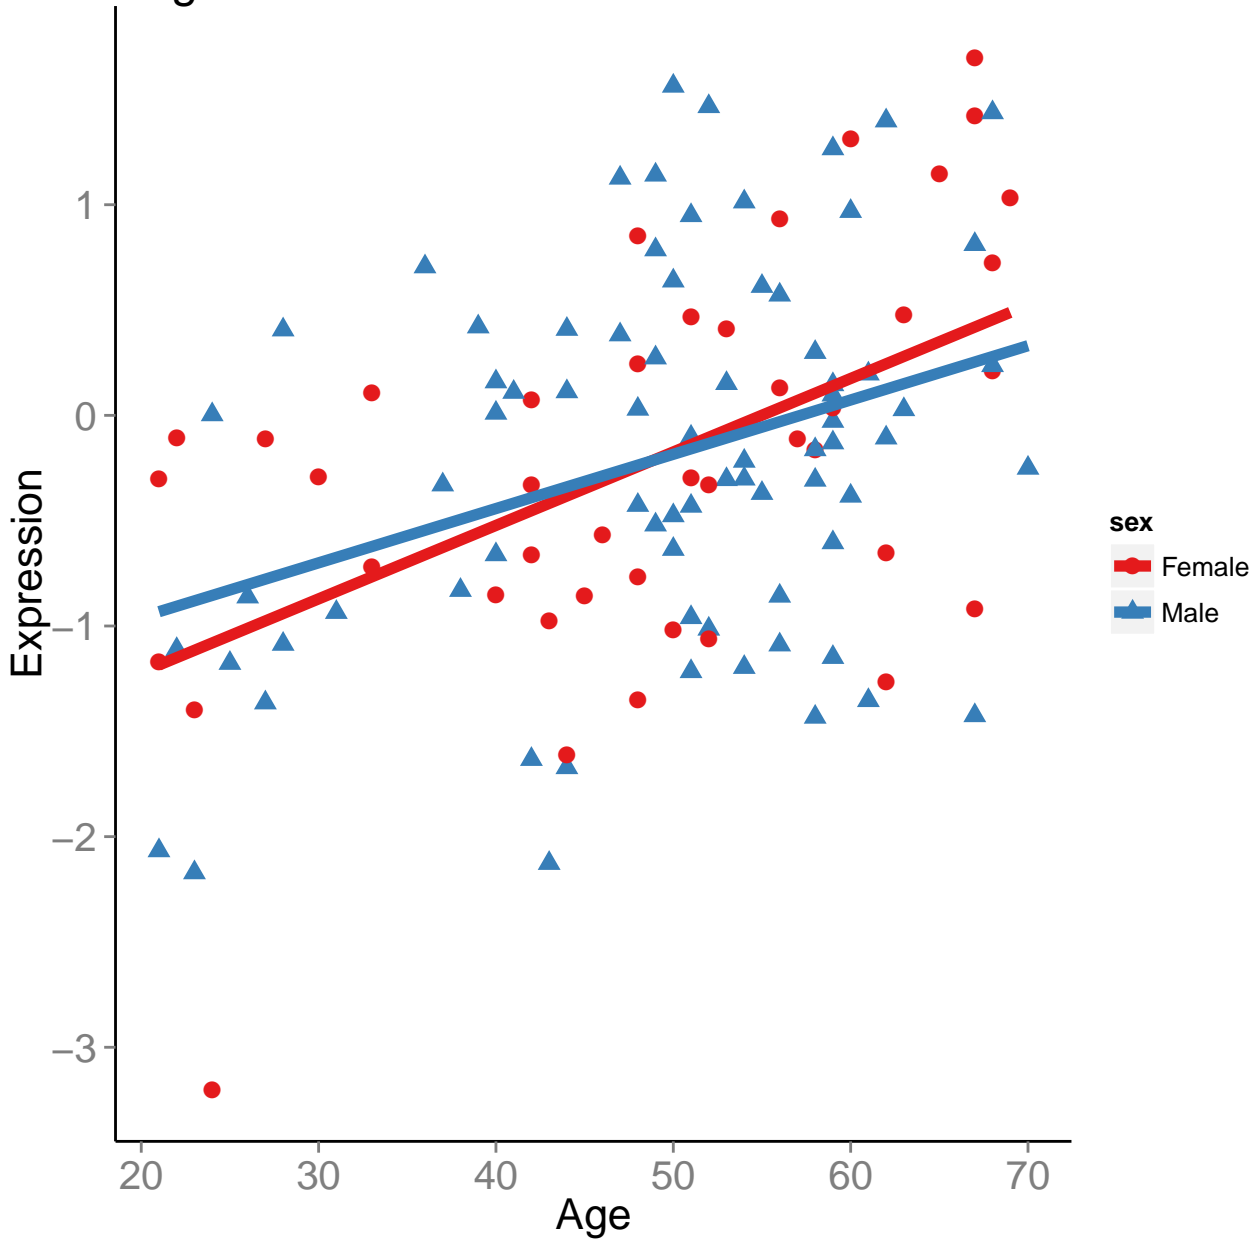

Lung: NEGR1 Pearson-R=0.42 Pval=2.19E-06

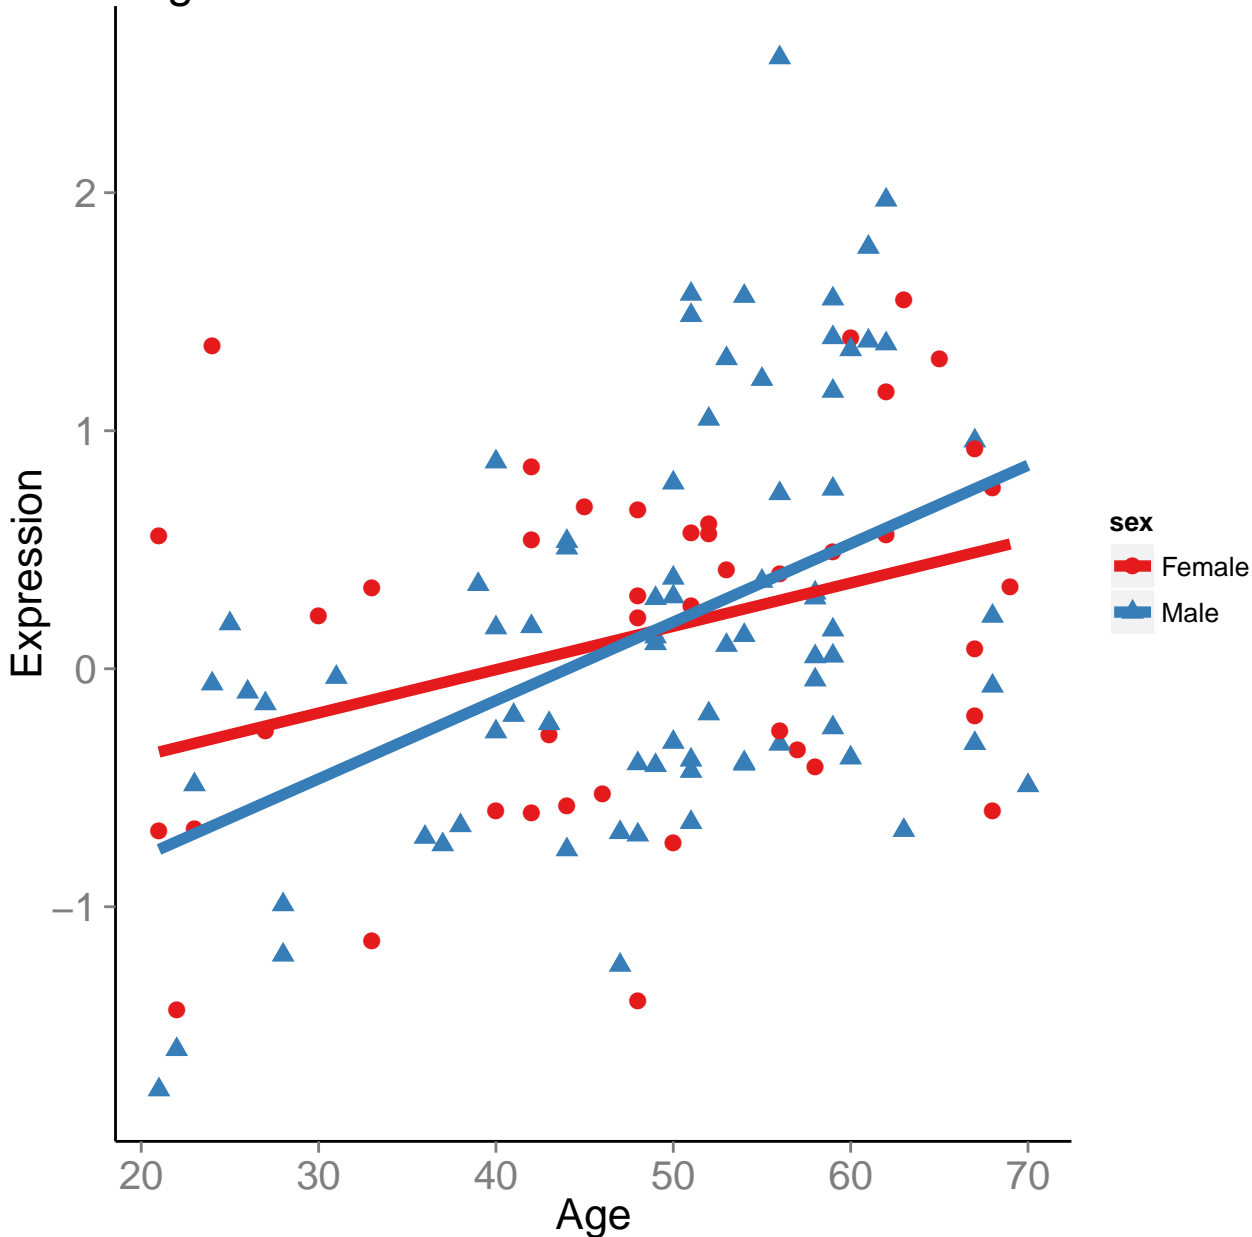

Lung: C1S Pearson-R=0.42 Pval=2.45E-06

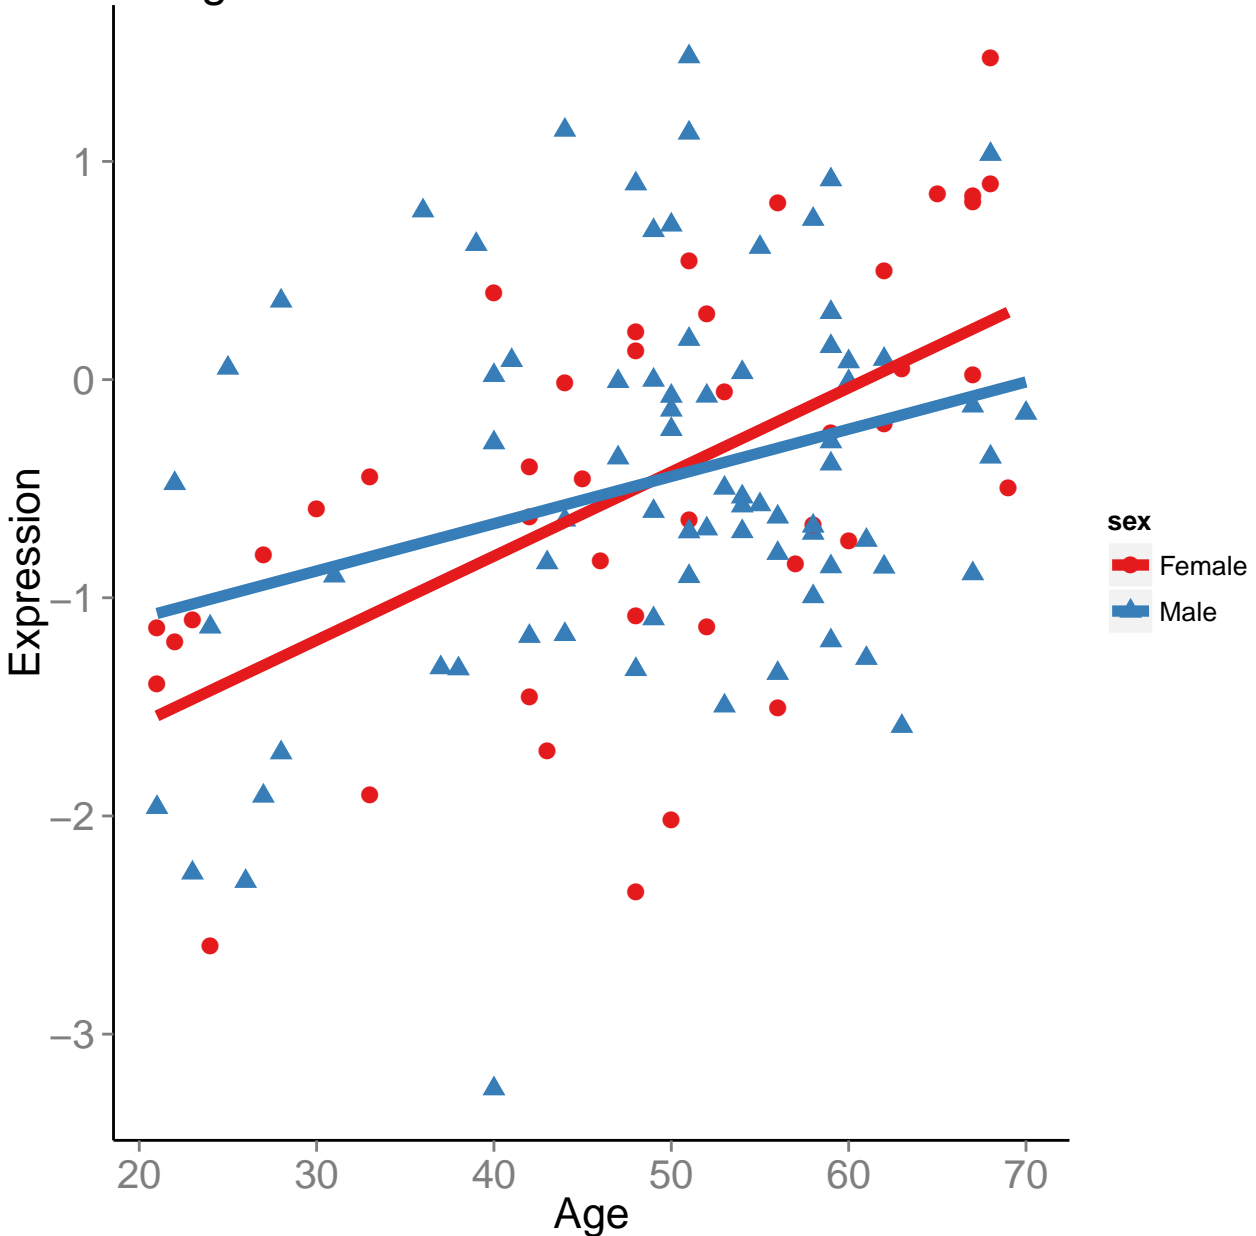

Lung: PALLD Pearson-R=0.42 Pval=2.48E-06

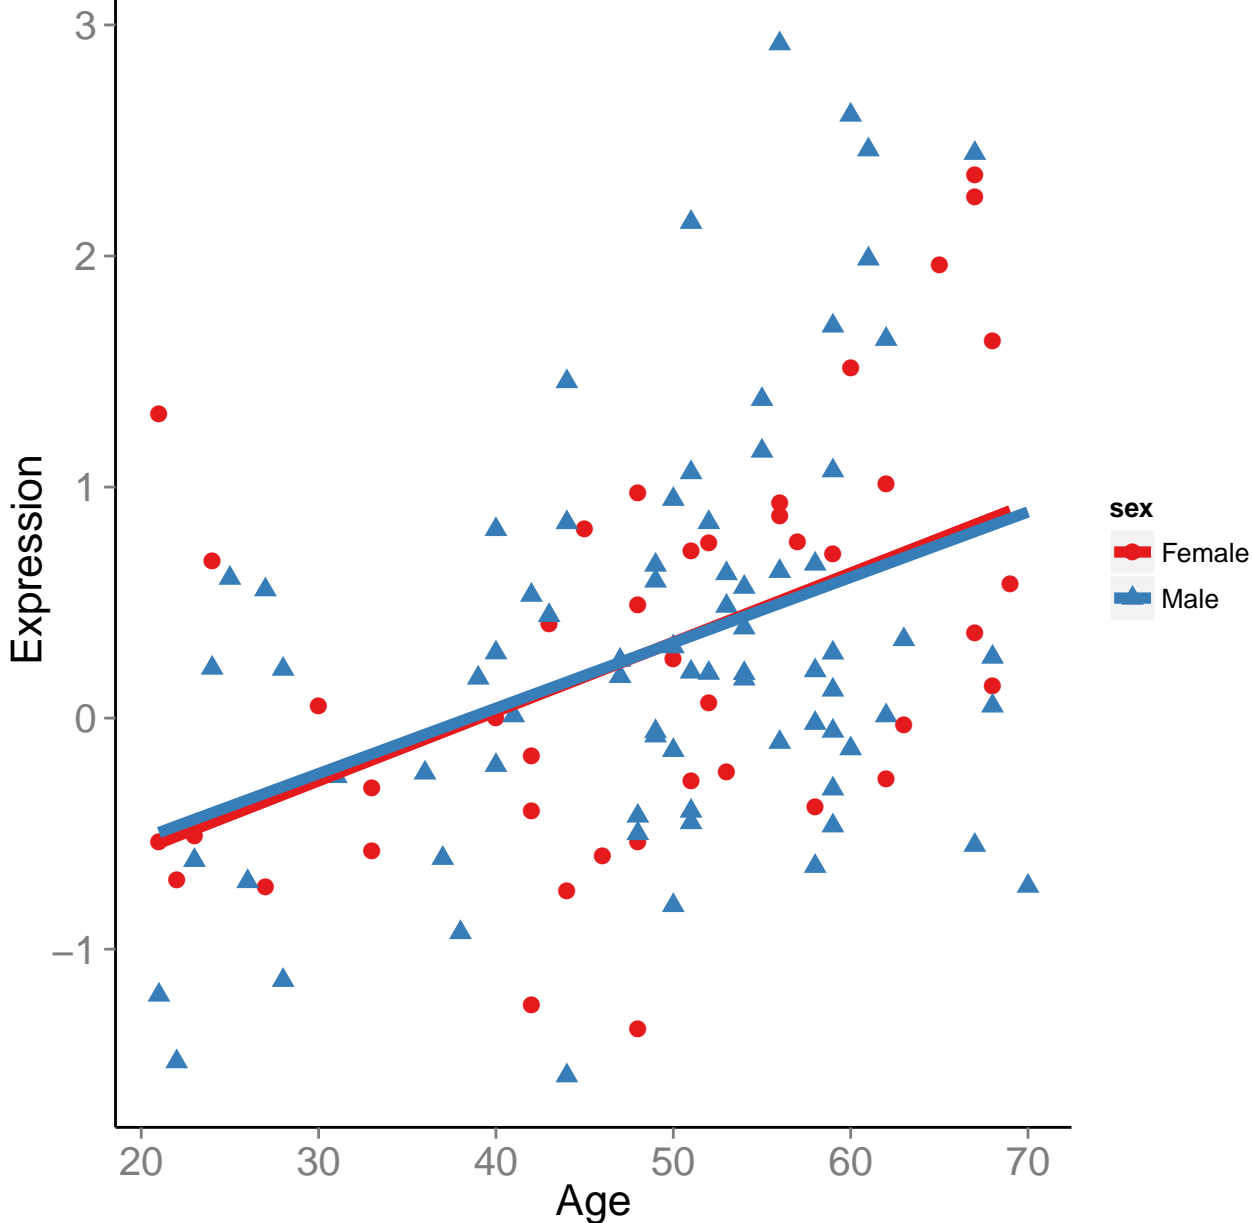



Lung: AE000658.22 Pearson-R=-0.42 Pval=2.67E-06

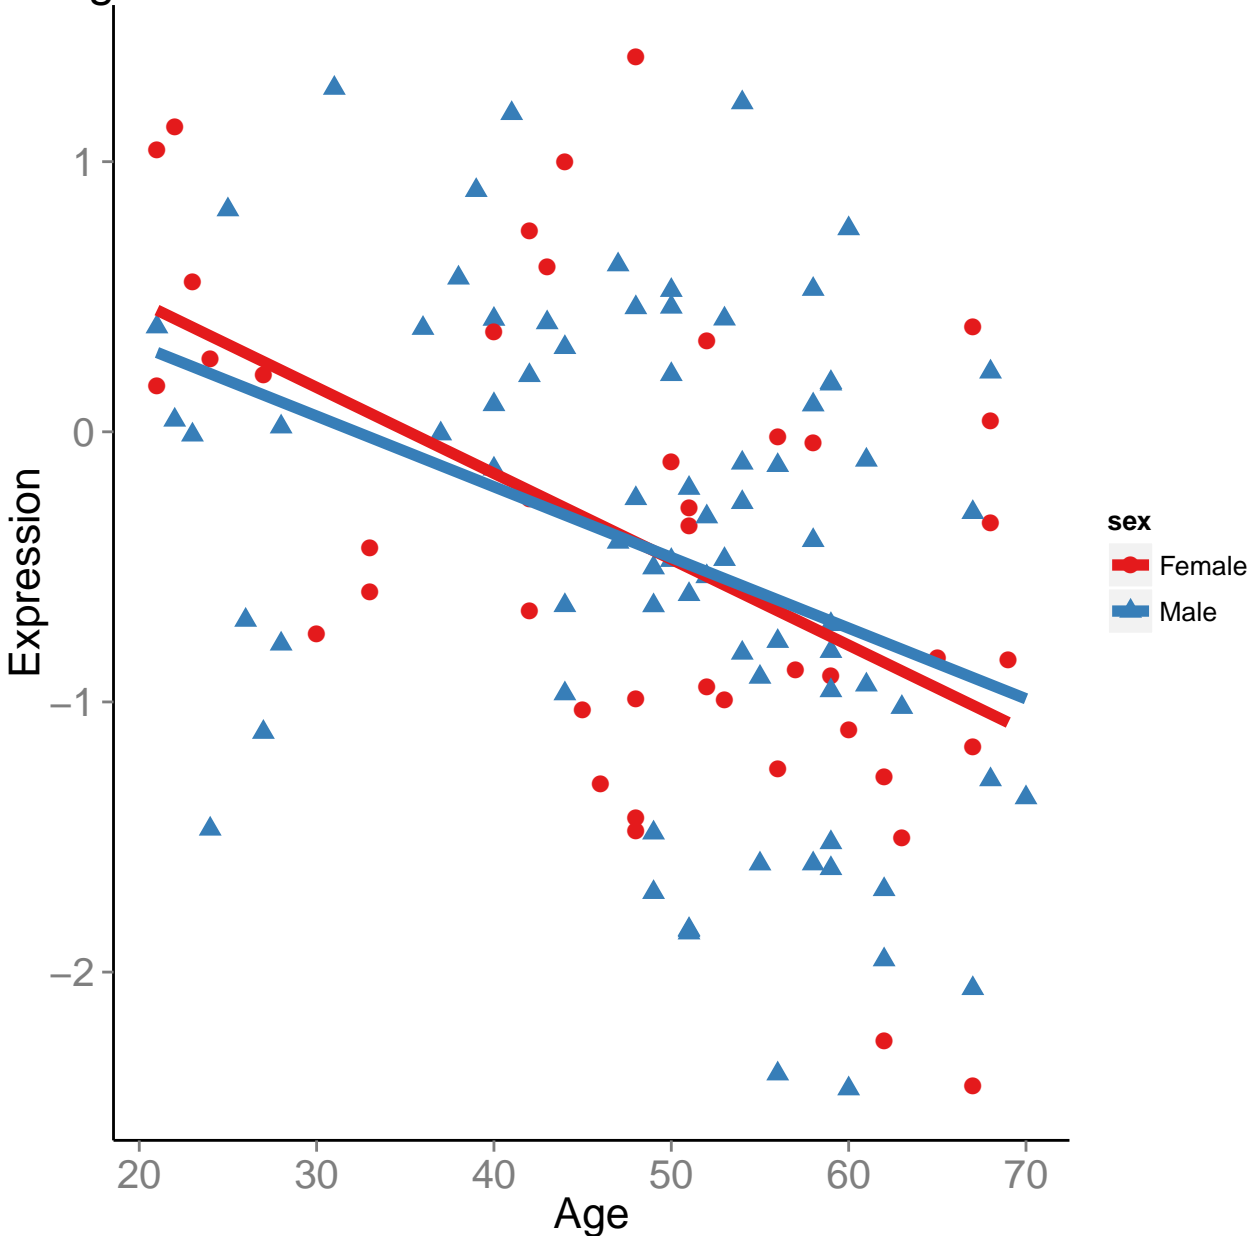

Lung: MAN1A1 Pearson-R=0.41 Pval=2.93E-06

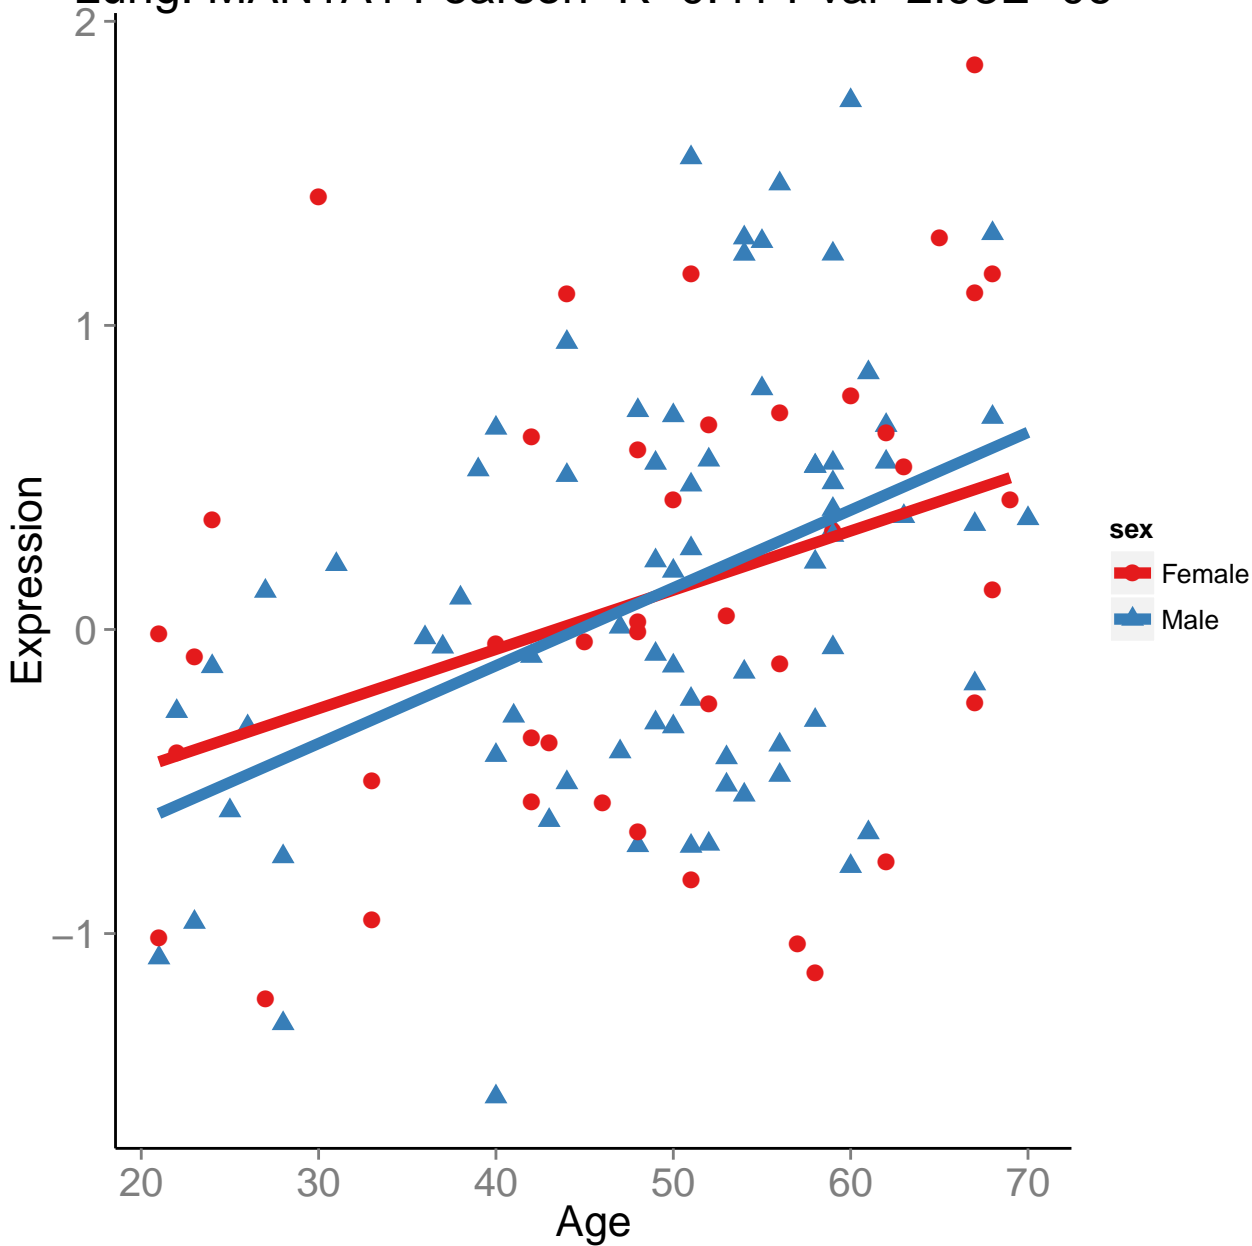

Lung: SPARCL1 Pearson-R=0.41 Pval=3.15E-06

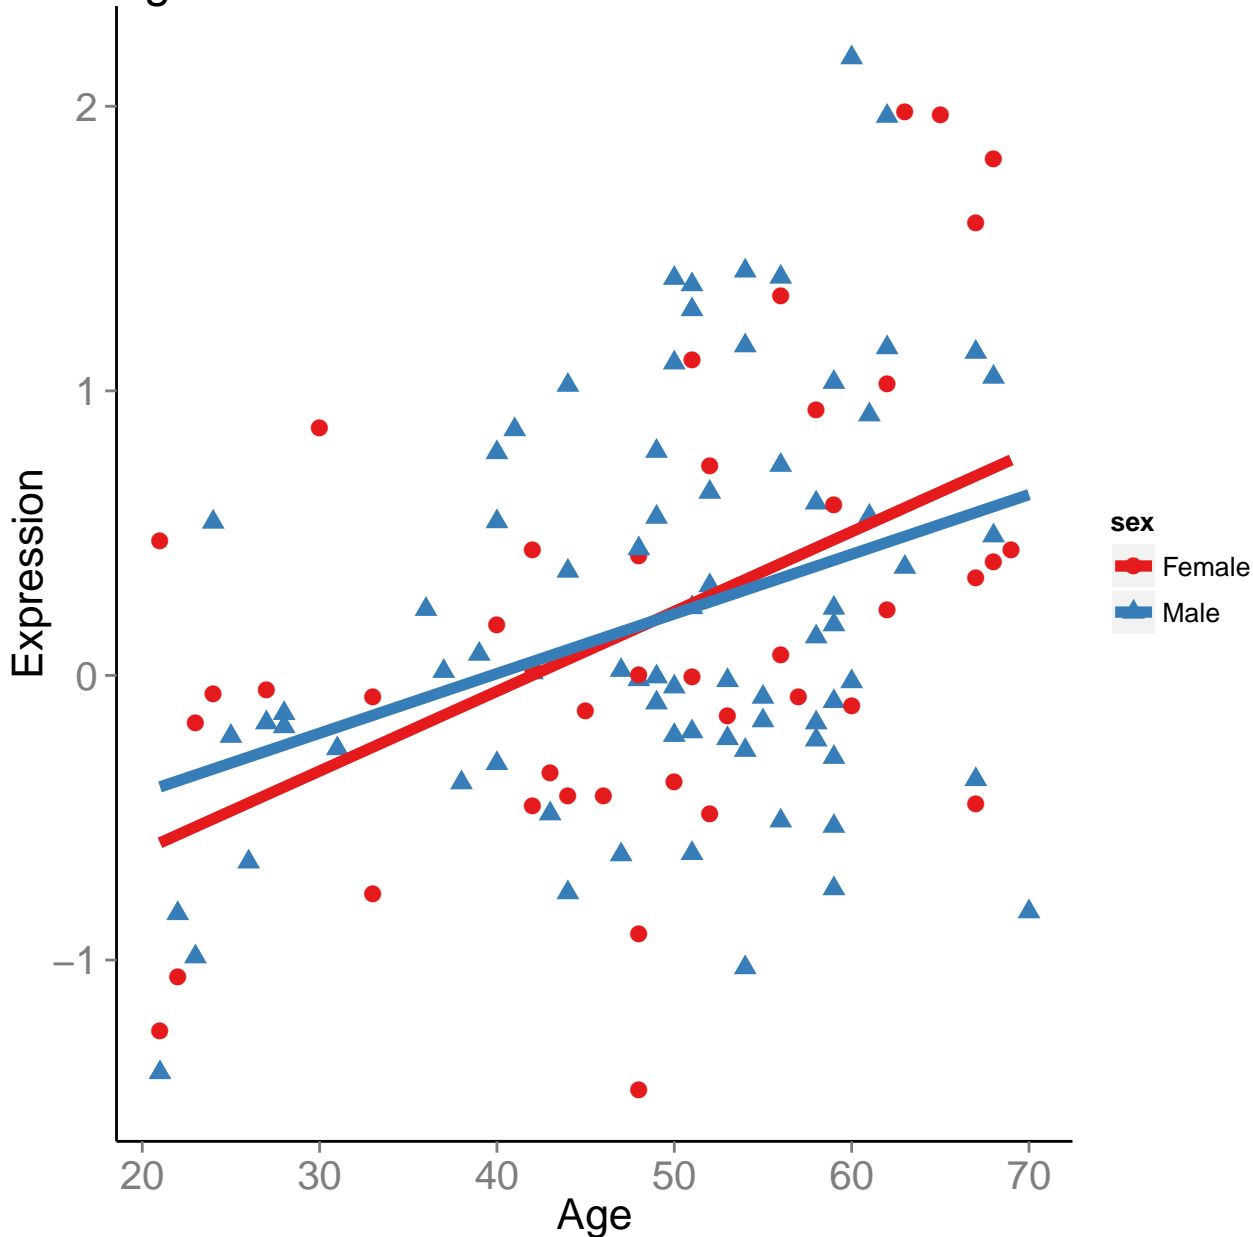

Lung: SLC6A14 Pearson-R=-0.41 Pval=3.43E-06

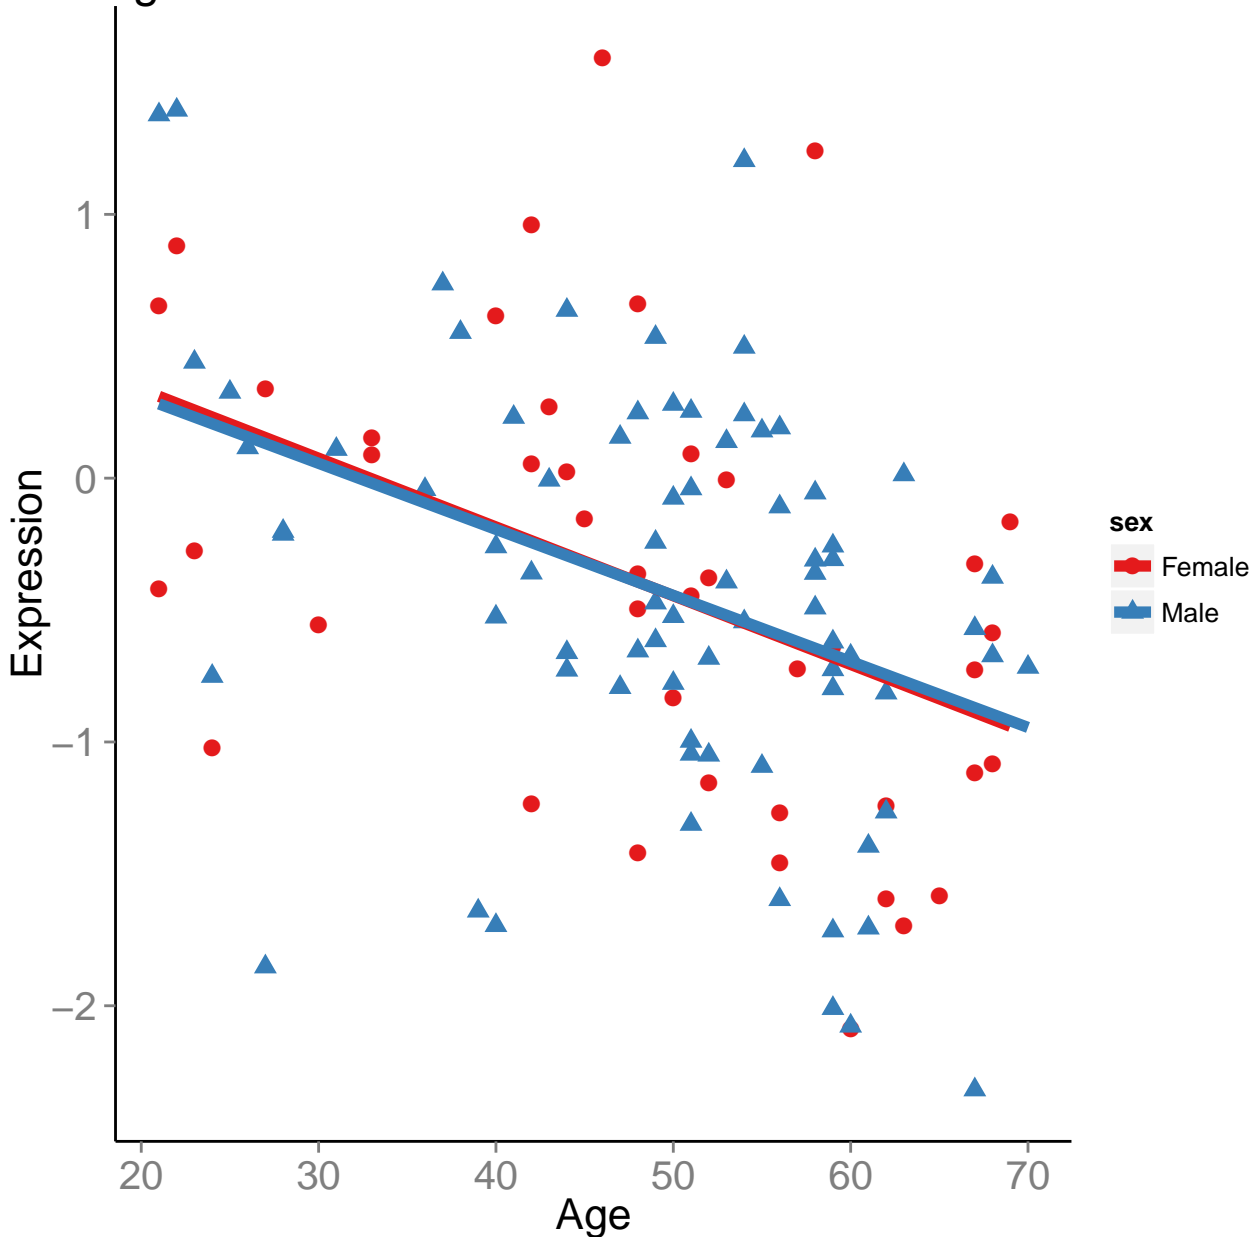

Lung: RP11-761I4.1 Pearson-R=0.41 Pval=3.43E-06

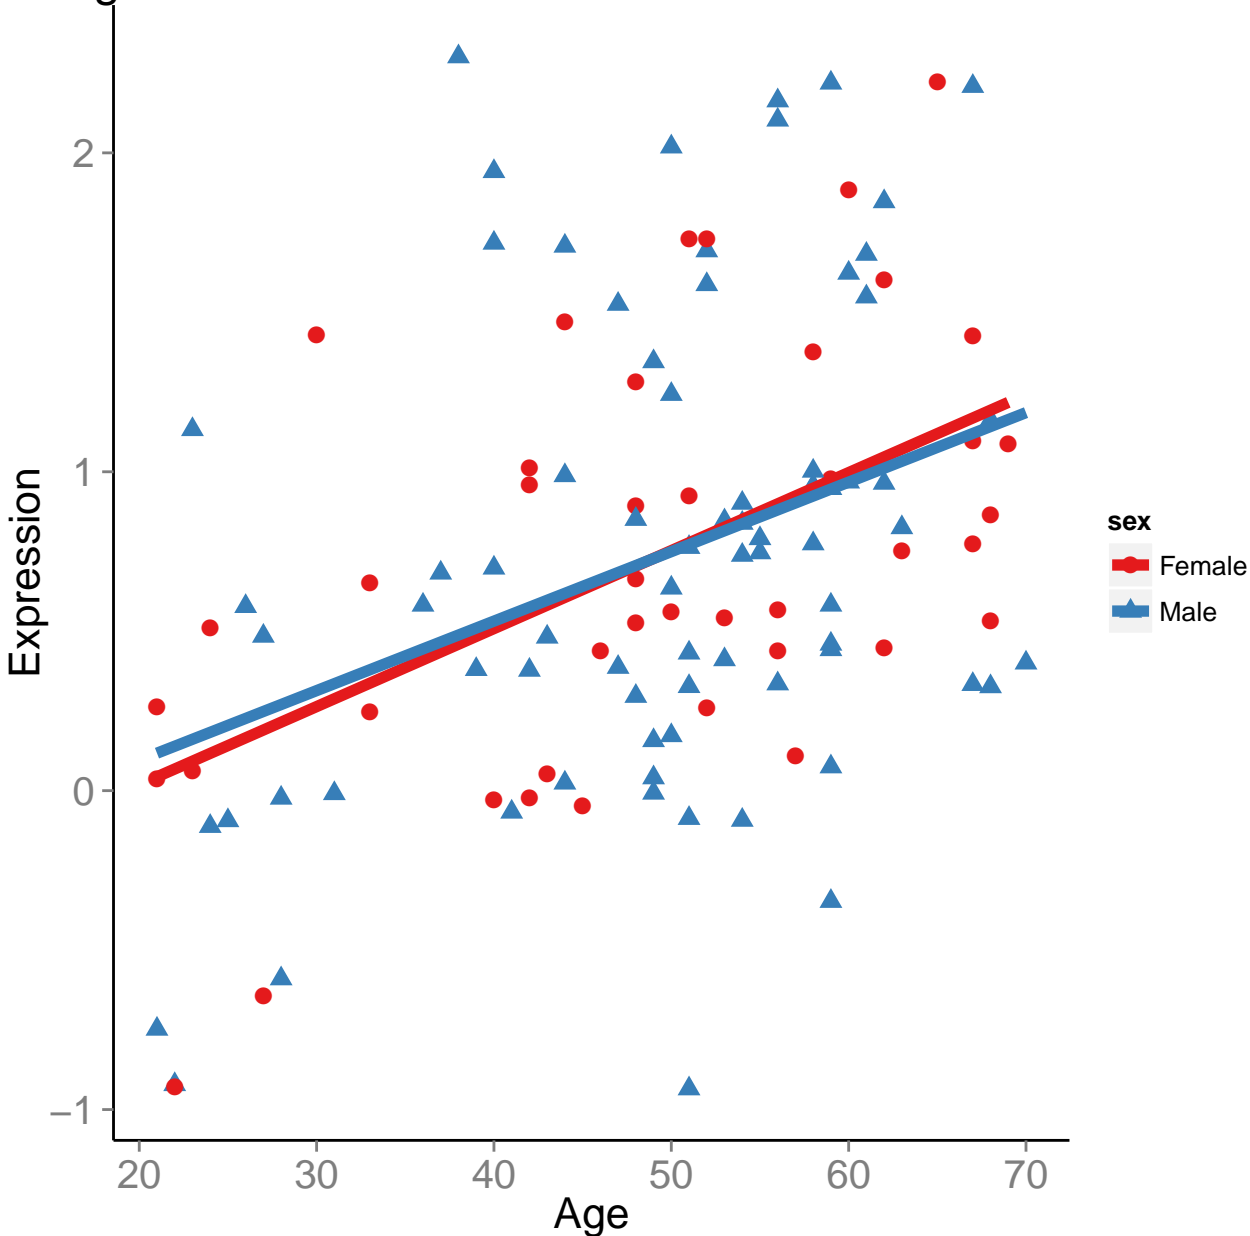

Lung: MMP15 Pearson-R=-0.41 Pval=3.40E-06

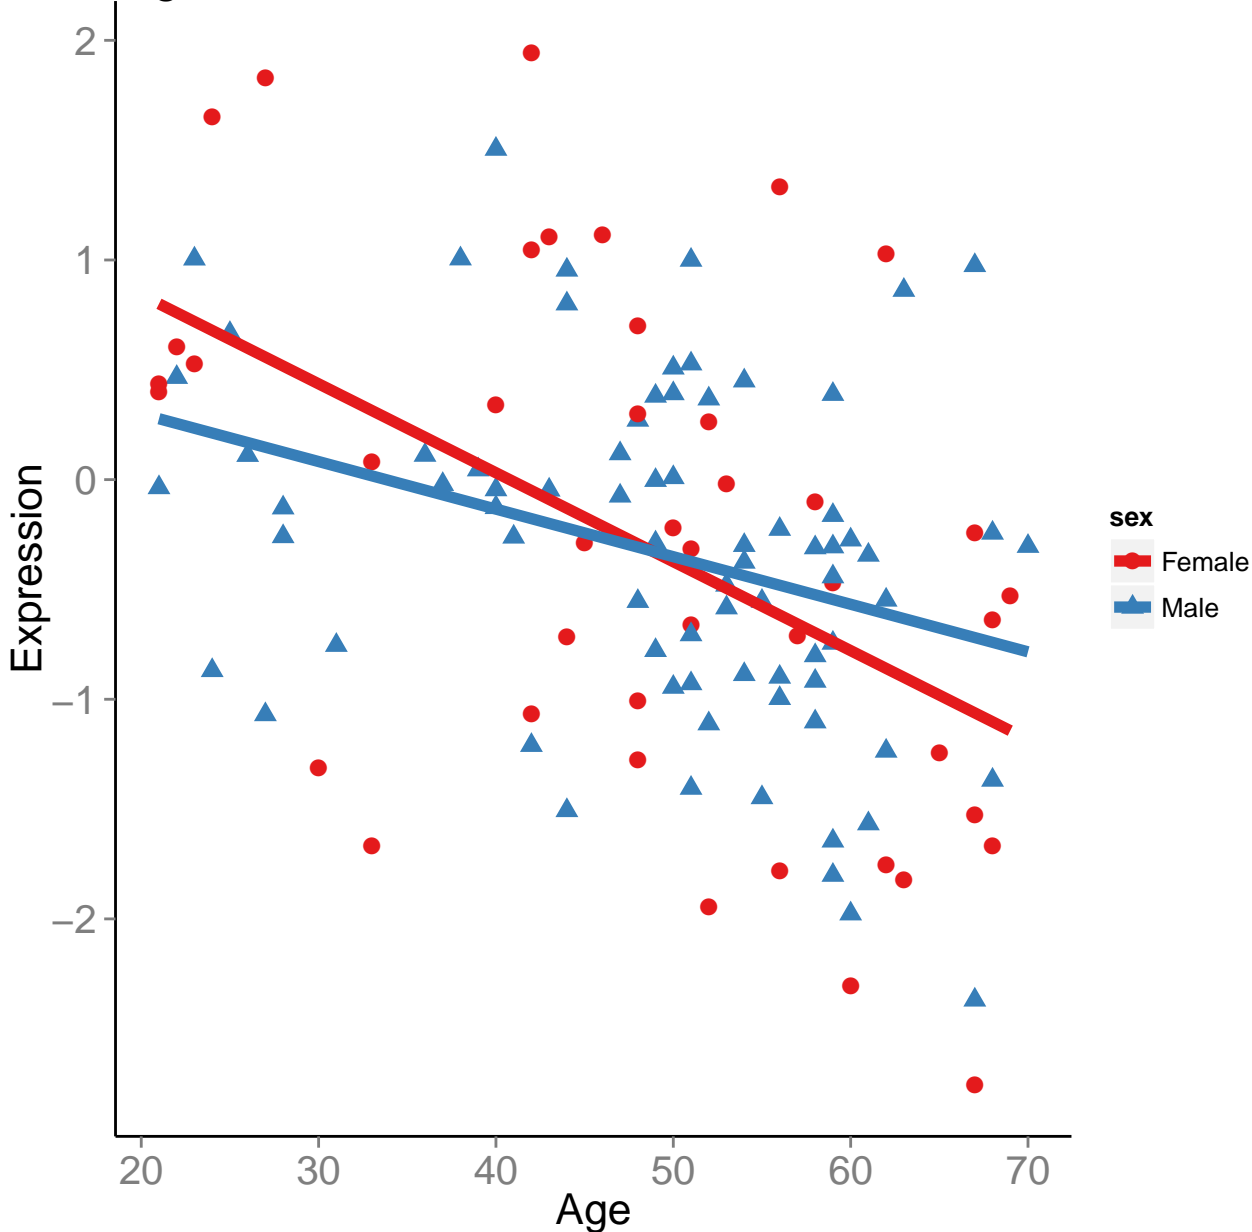

Lung: RBMS3 Pearson-R=0.41 Pval=3.77E-06

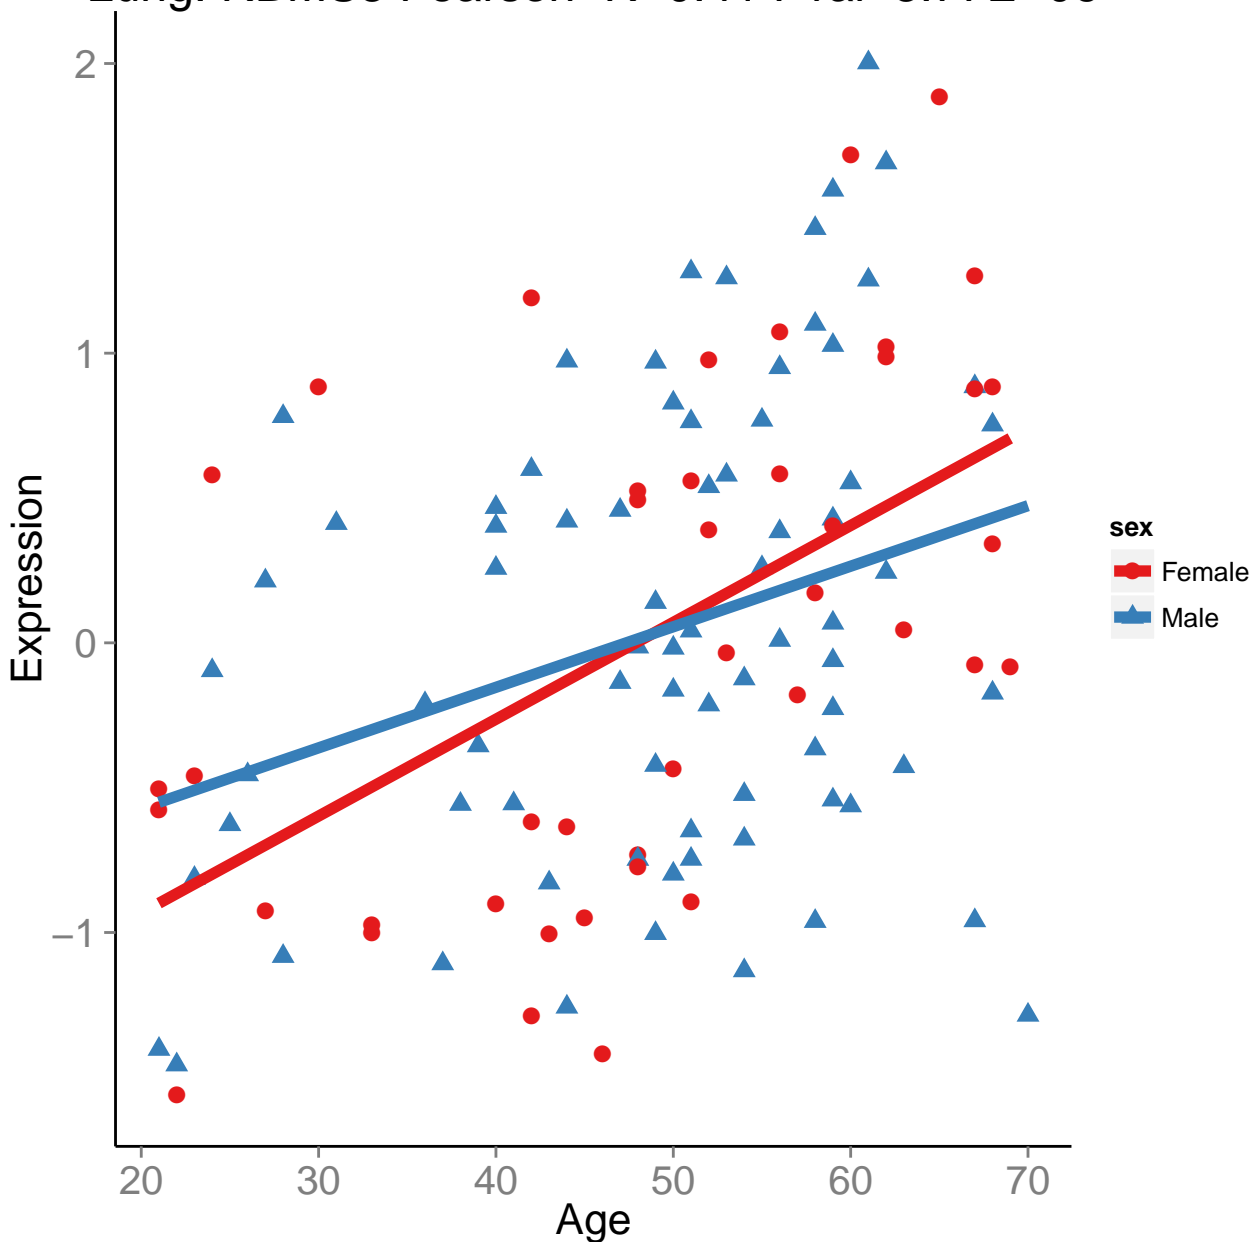

Lung: DKK3 Pearson-R=0.41 Pval=3.72E-06

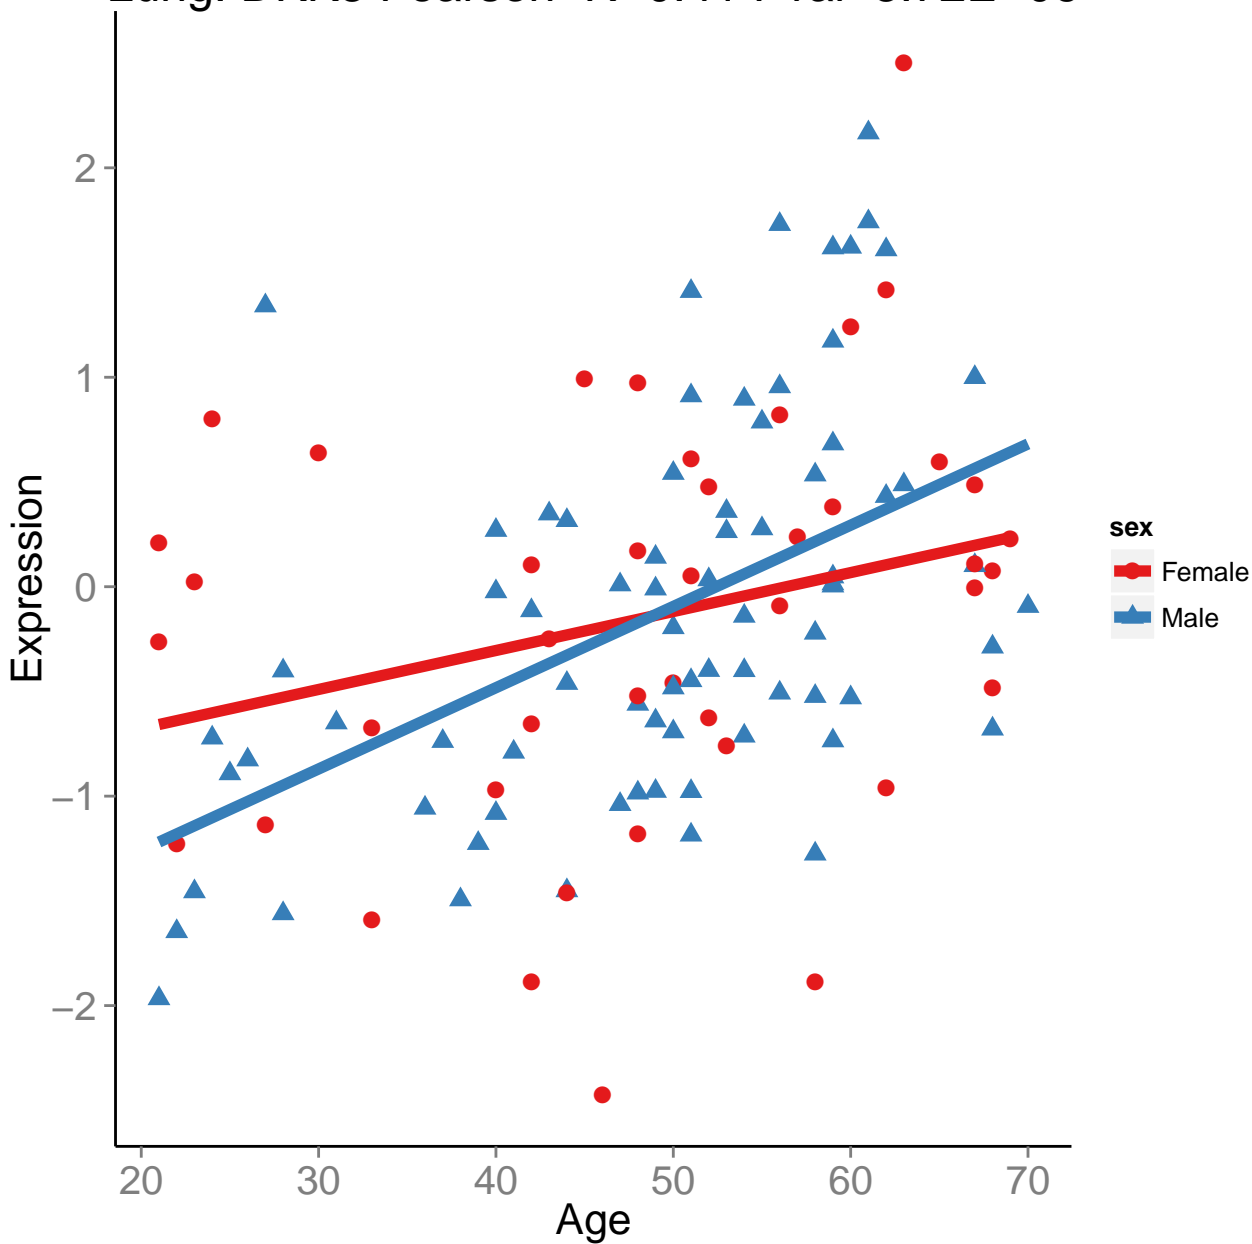



Lung: NR0B2 Pearson-R=-0.41 Pval=3.79E-06

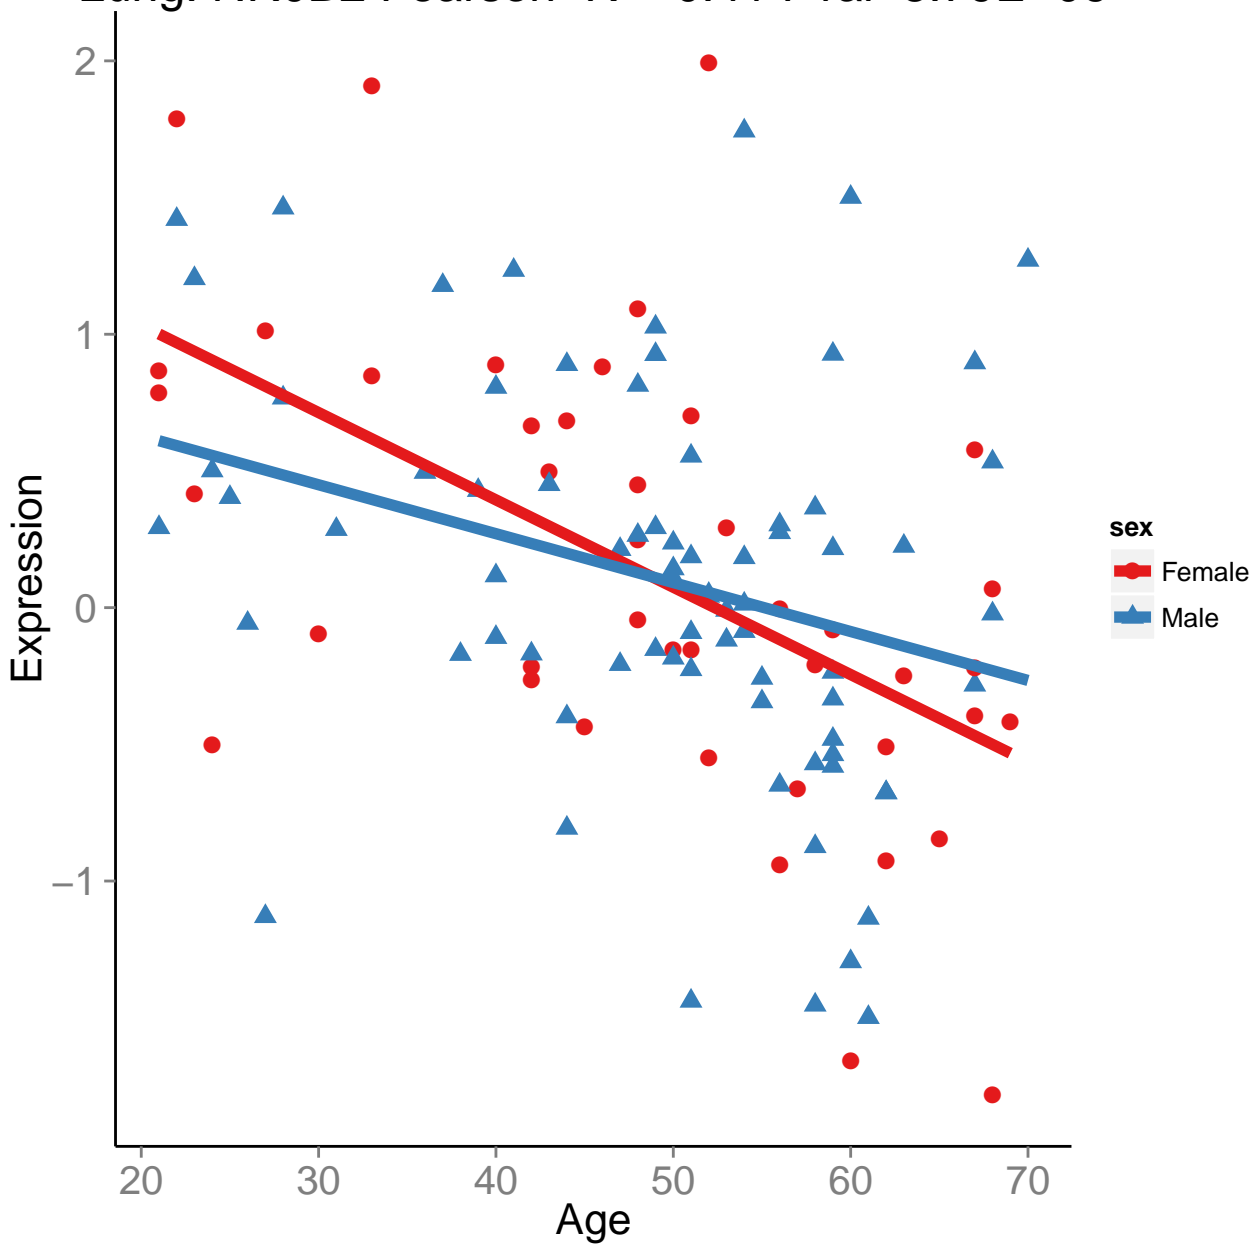

Lung: ZFP90 Pearson-R=0.41 Pval=3.94E-06

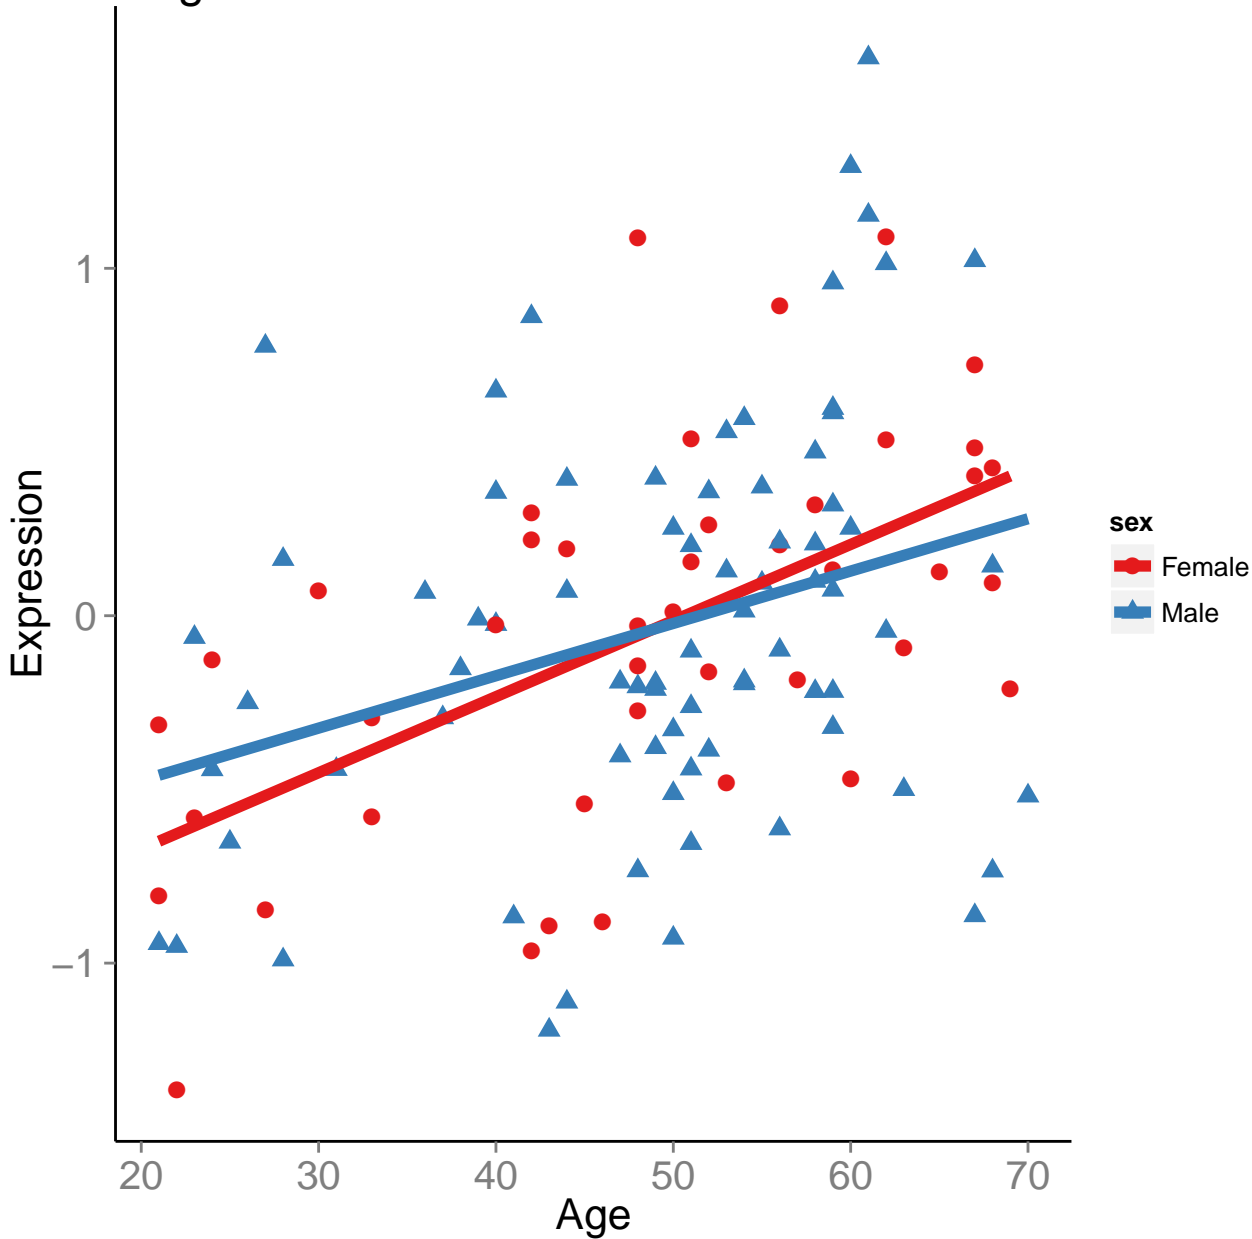

Lung: AEBP1 Pearson-R=0.41 Pval=4.69E-06

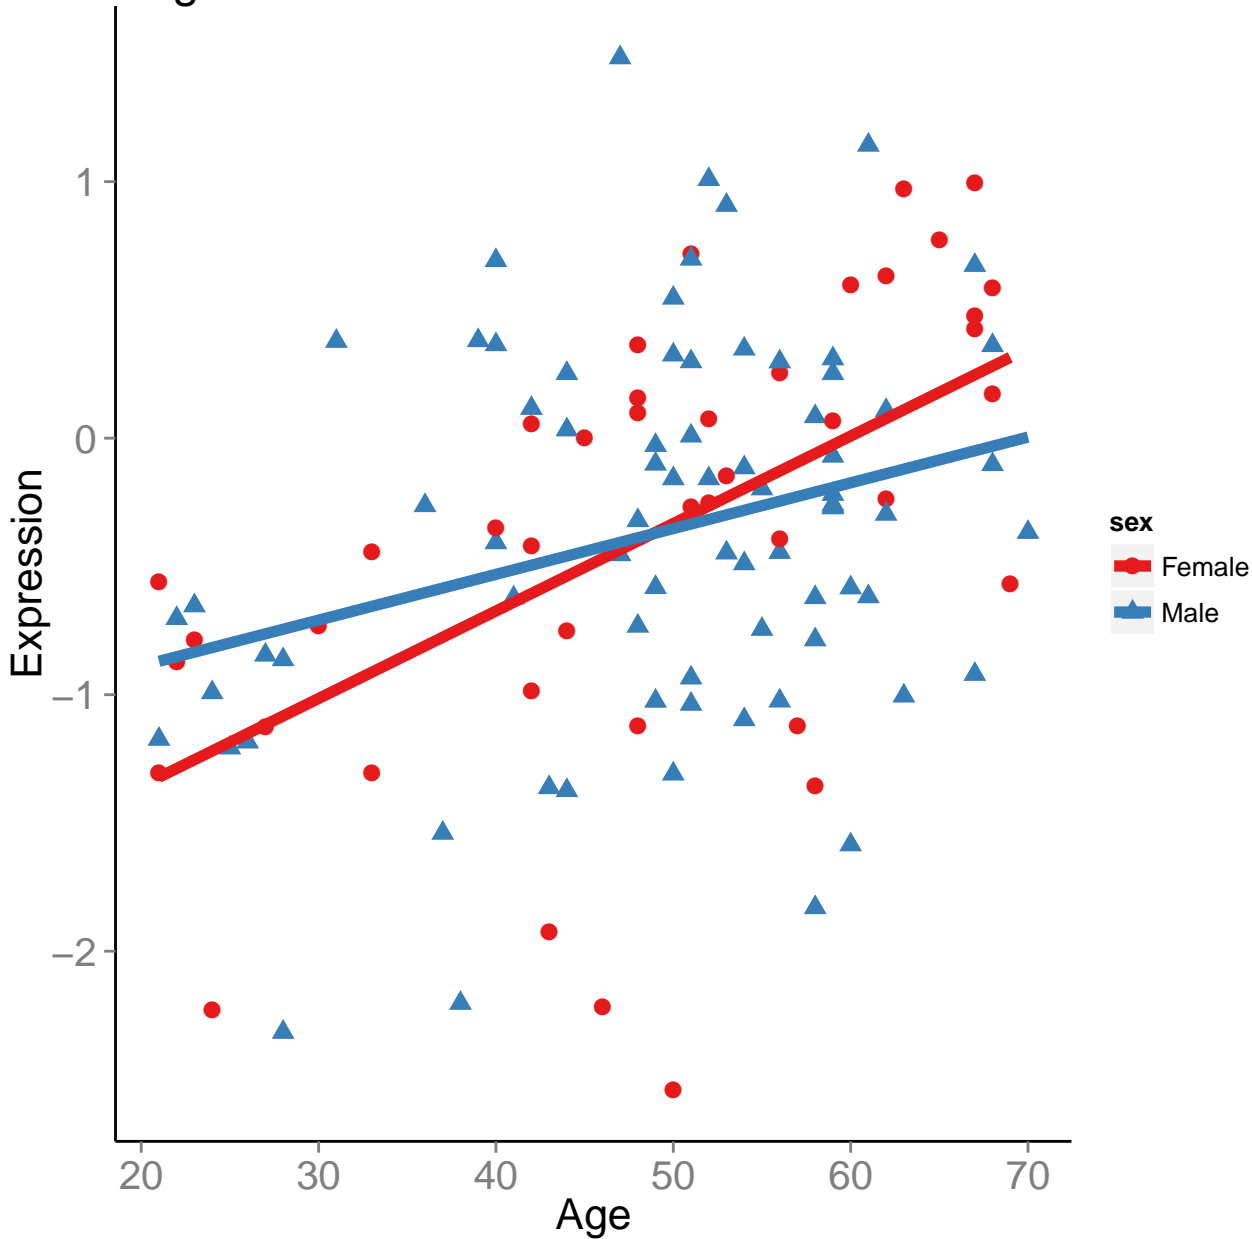

Lung: PHF17 Pearson-R=0.41 Pval=4.74E-06

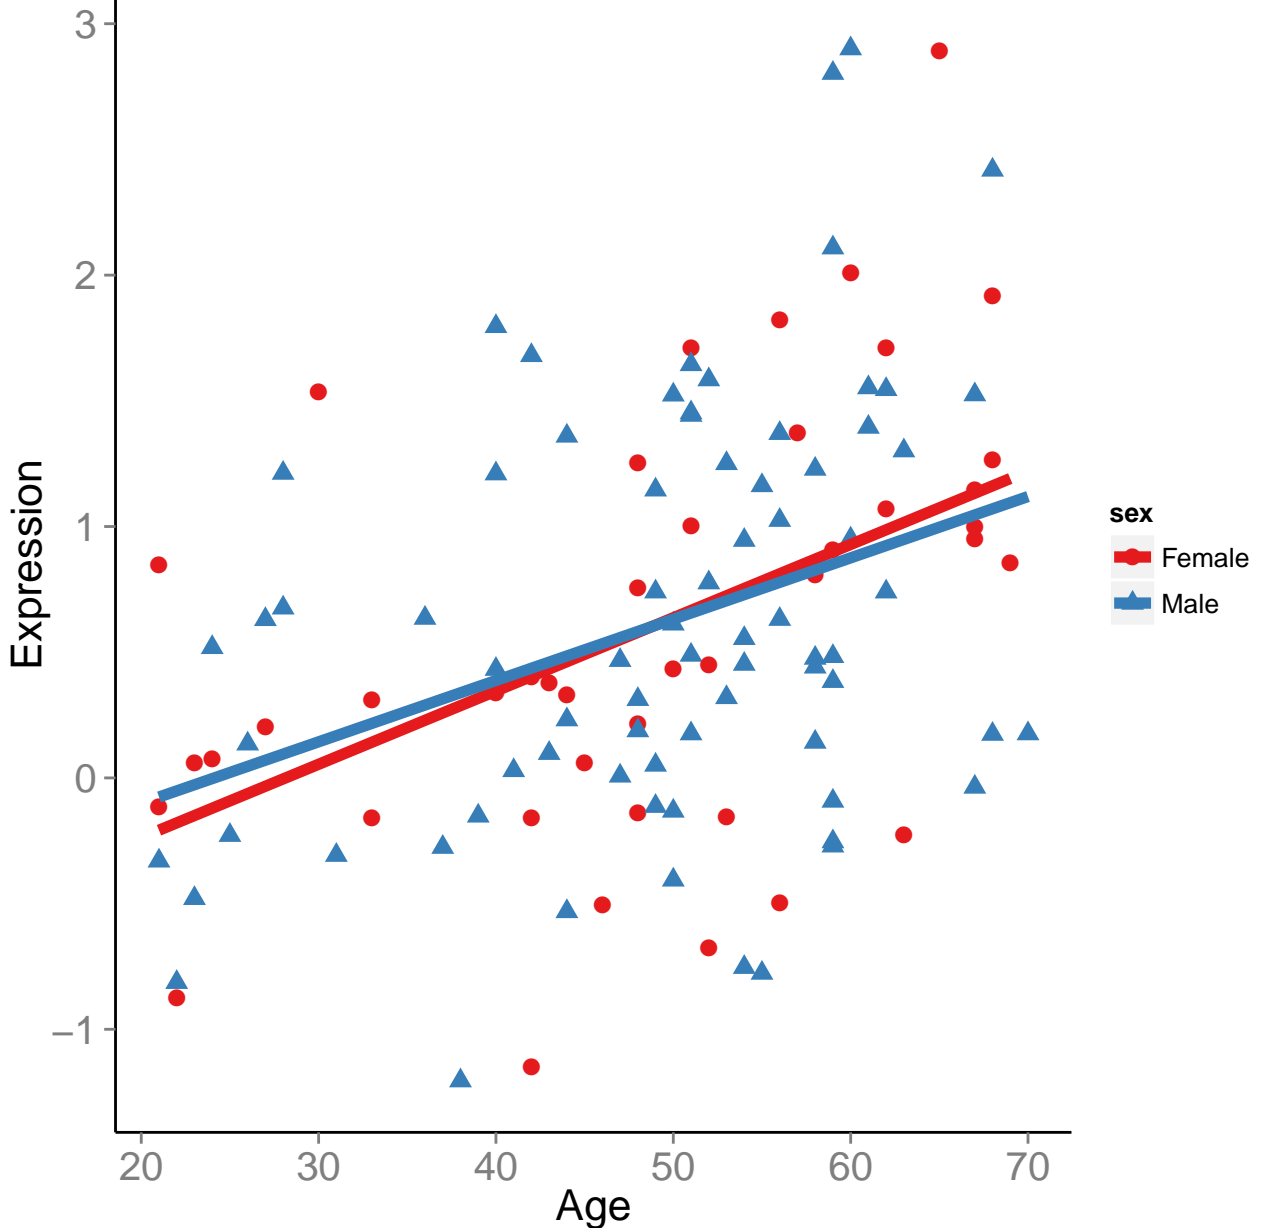

Lung: NNAT Pearson-R=-0.41 Pval=4.64E-06

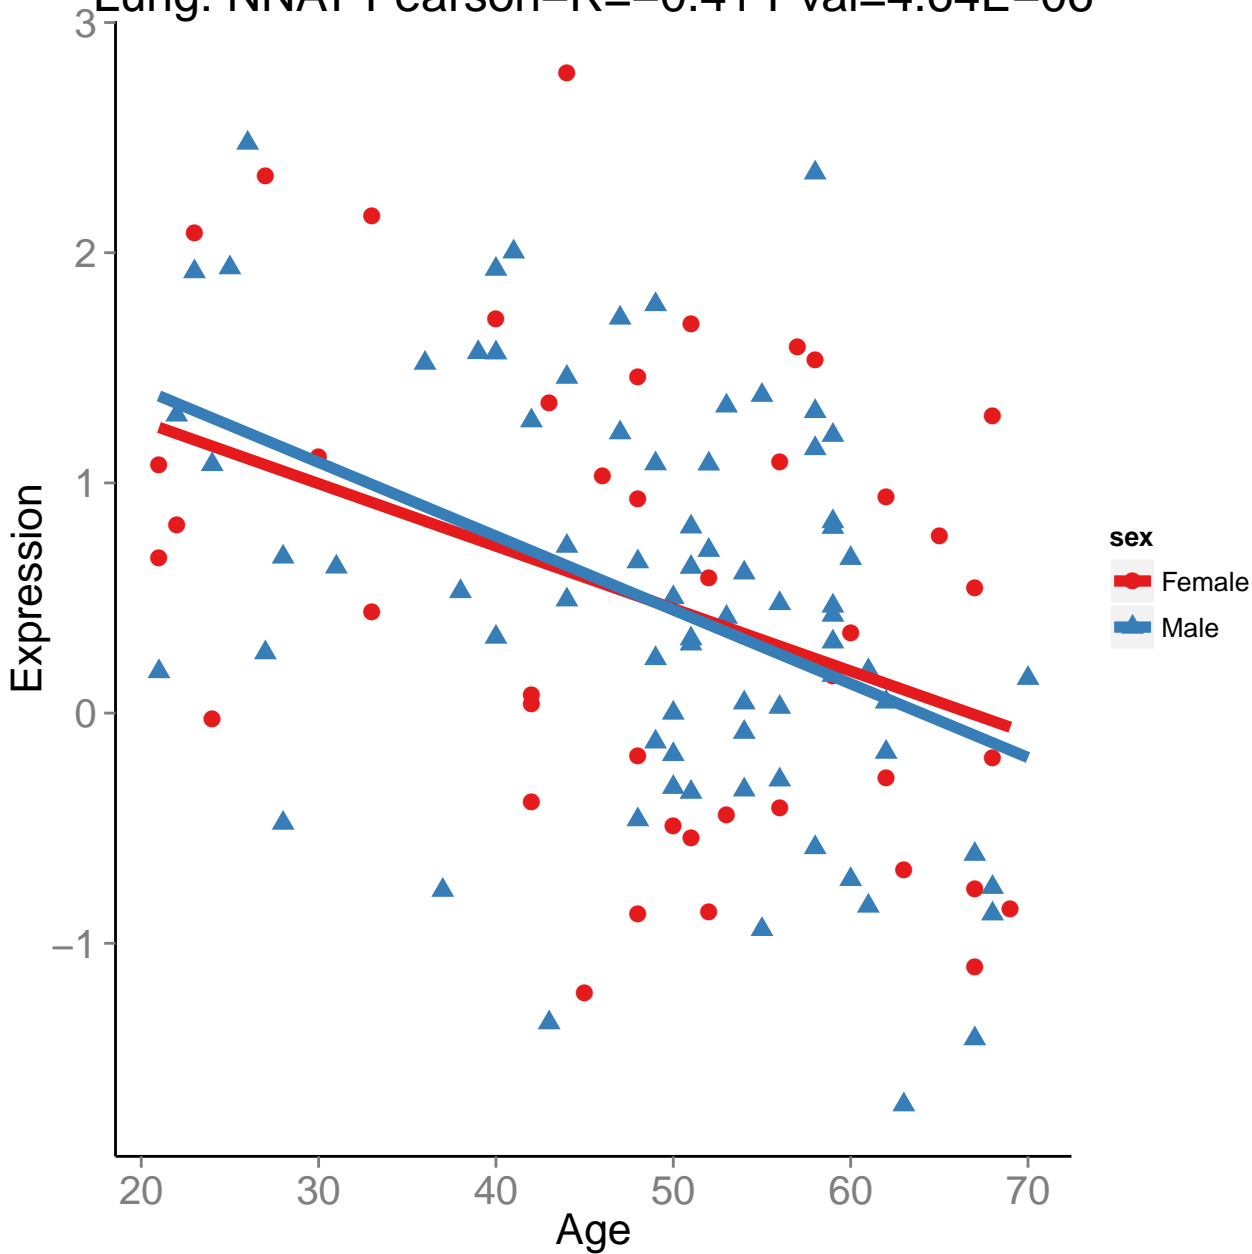

Lung: PLAGL2 Pearson-R=-0.41 Pval=4.69E-06

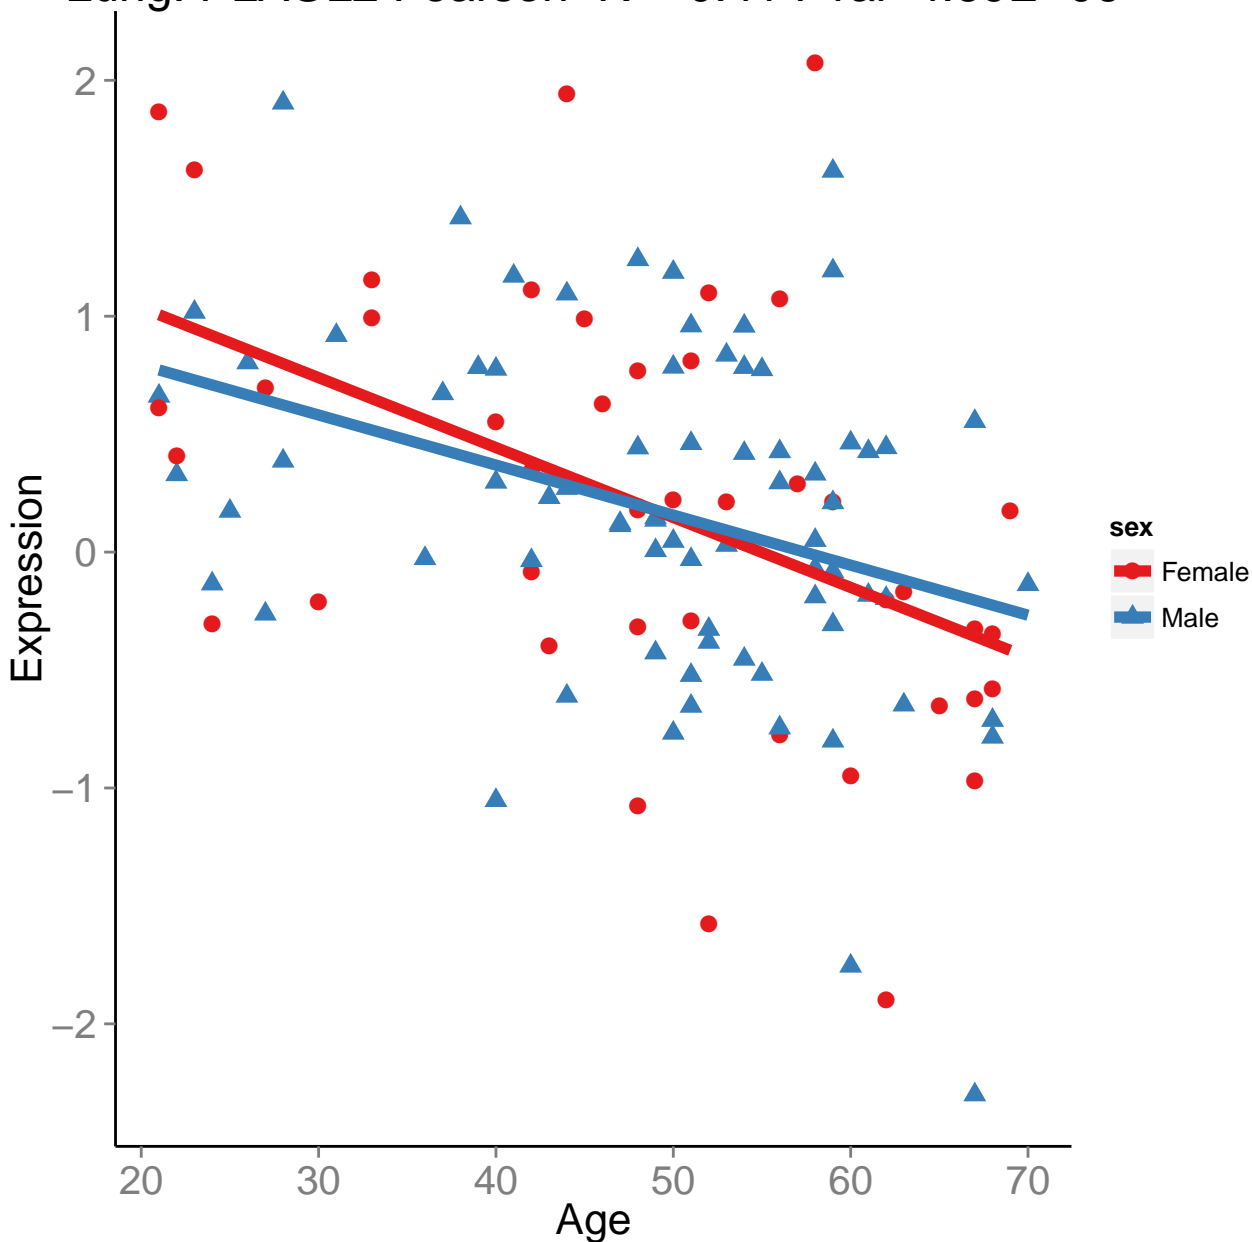

Lung: ATPAF2 Pearson-R=-0.41 Pval=4.72E-06

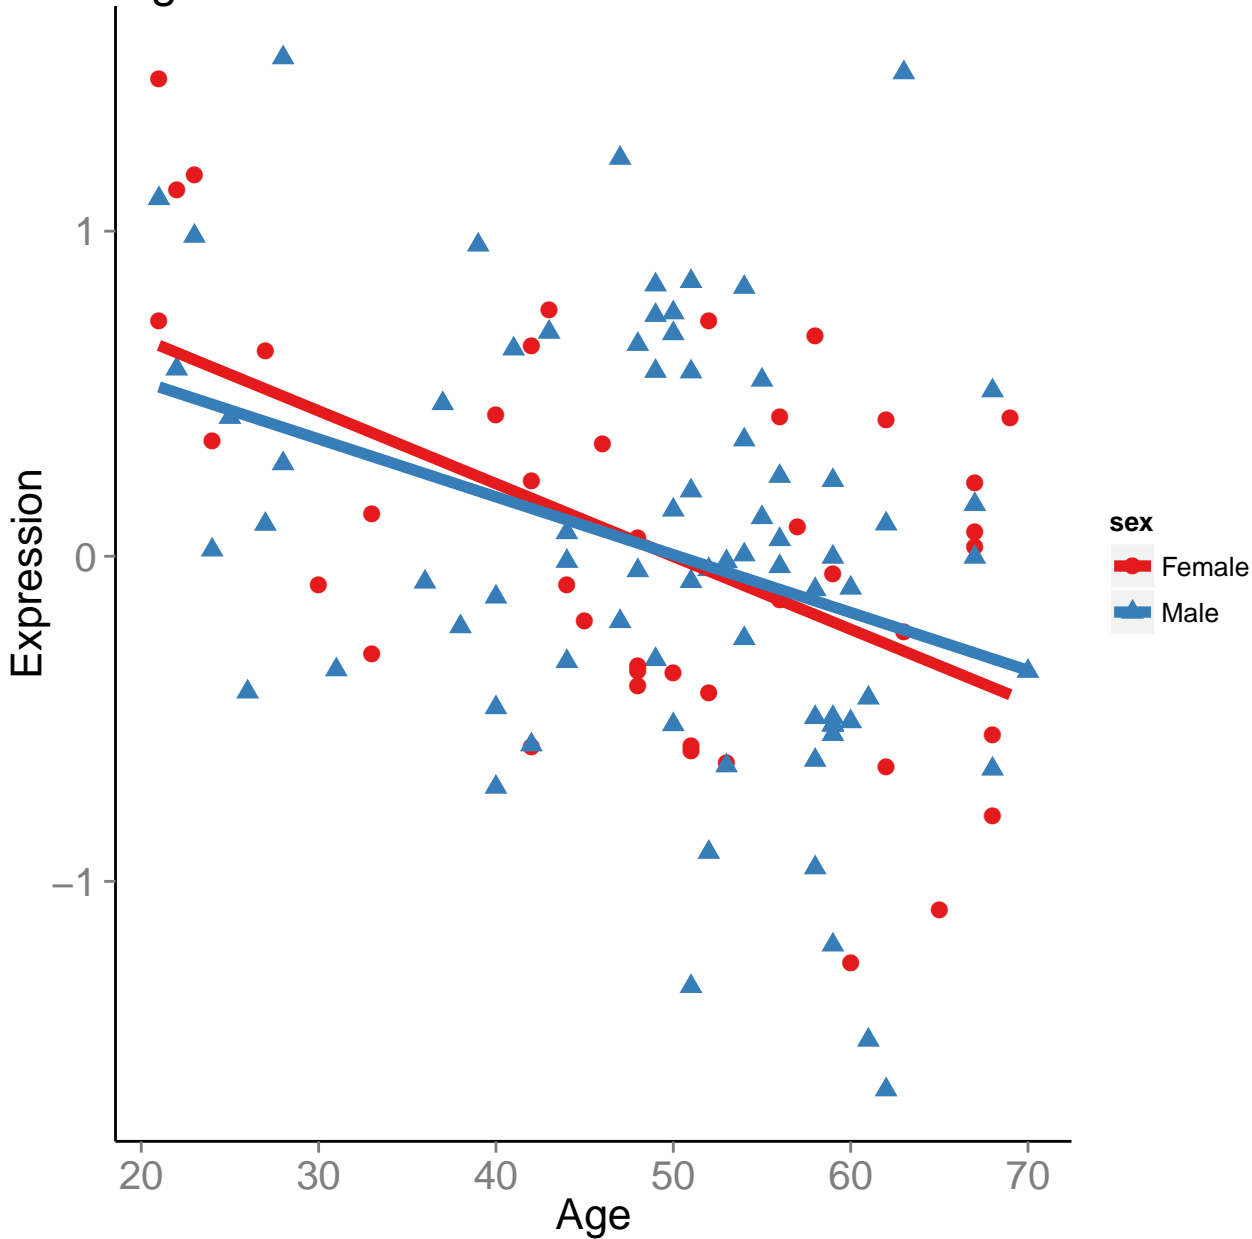

Lung: MTHFD2L Pearson-R=-0.40 Pval=4.91E-06

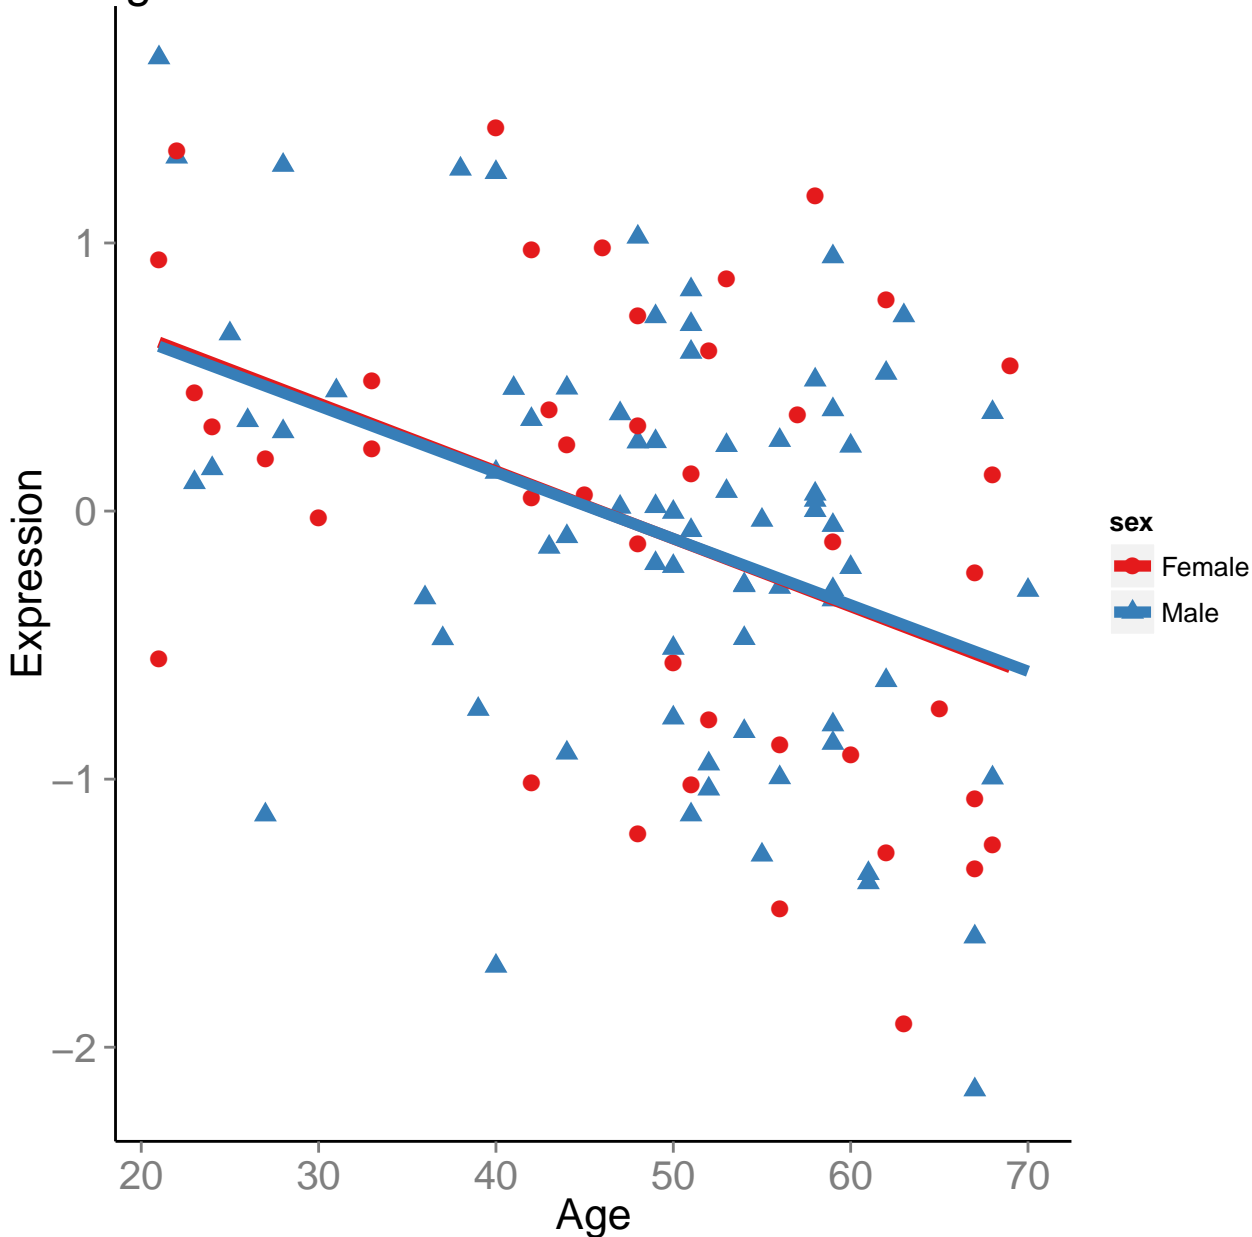



Lung: ROS1 Pearson-R=-0.41 Pval=4.90E-06

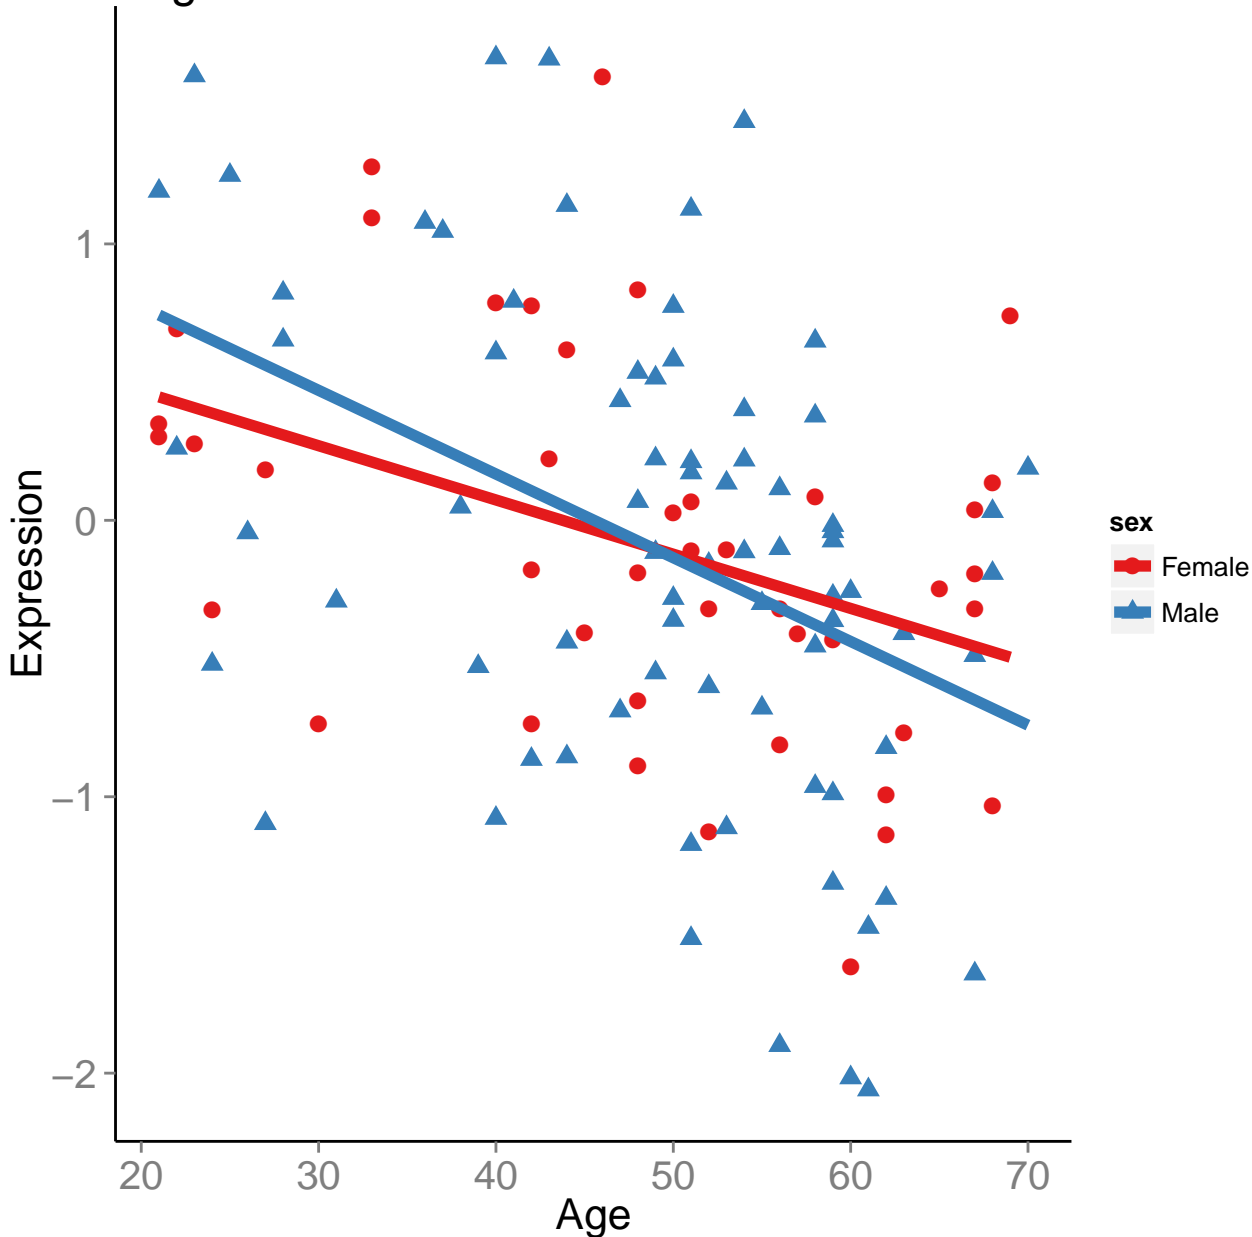

Lung: RNMTL1 Pearson-R=-0.40 Pval=5.41E-06

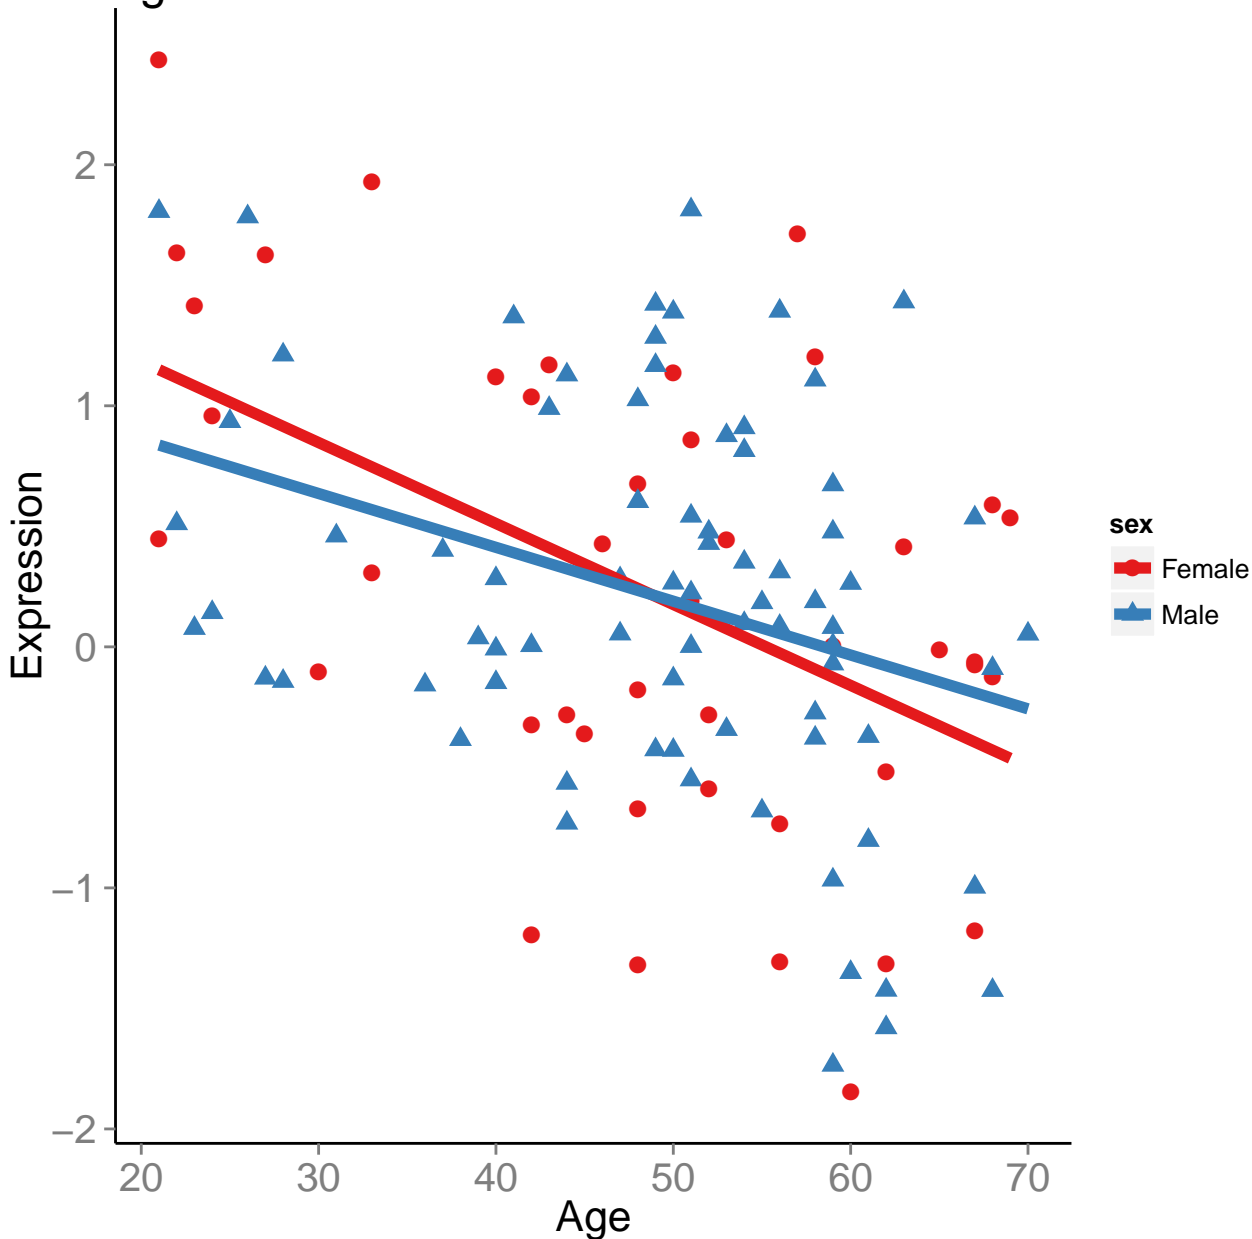

Lung: SVEP1 Pearson-R=0.40 Pval=5.90E-06

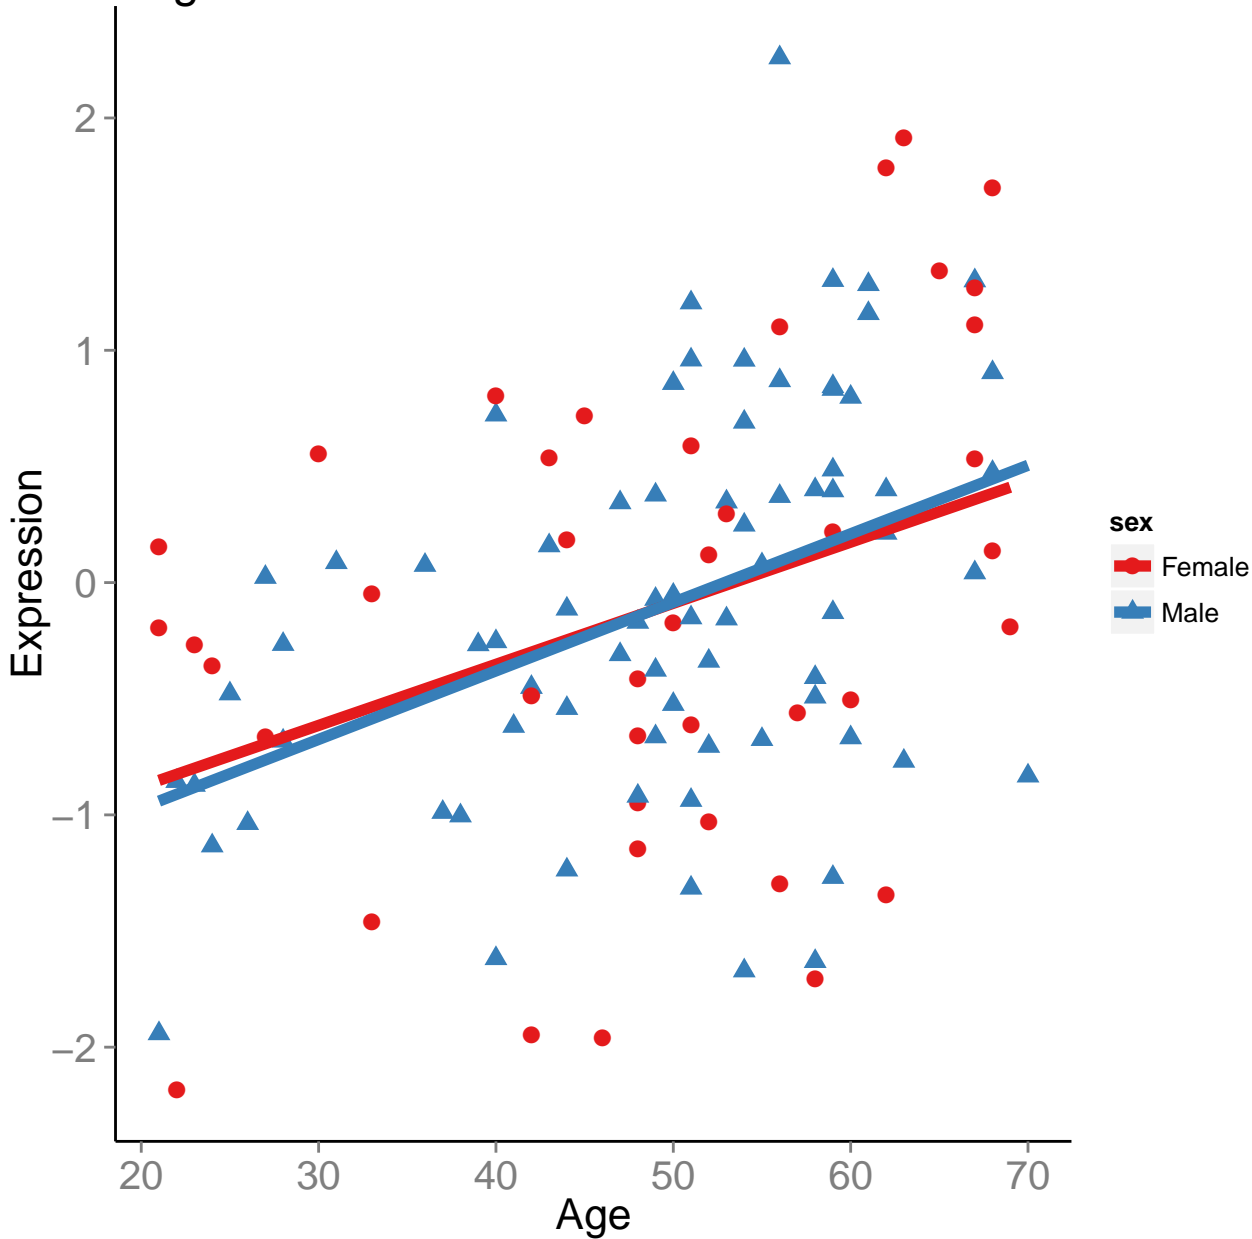

Lung: CHRDL1 Pearson-R=0.40 Pval=5.82E-06

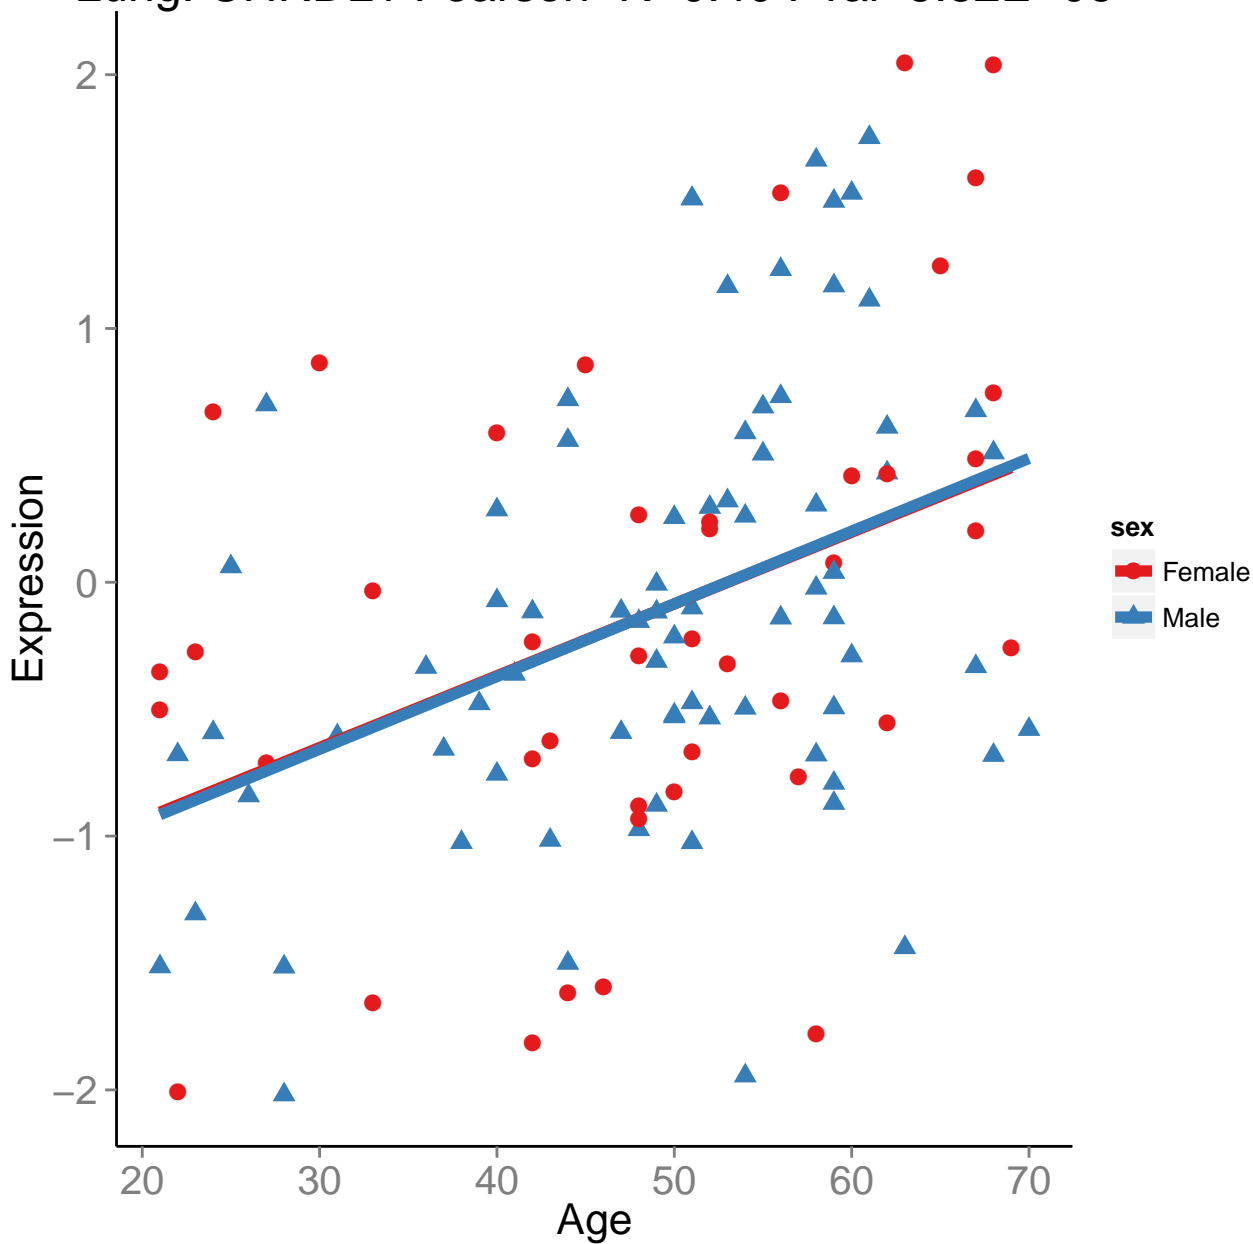

Lung: SEPT4 Pearson-R=0.40 Pval=6.32E-06

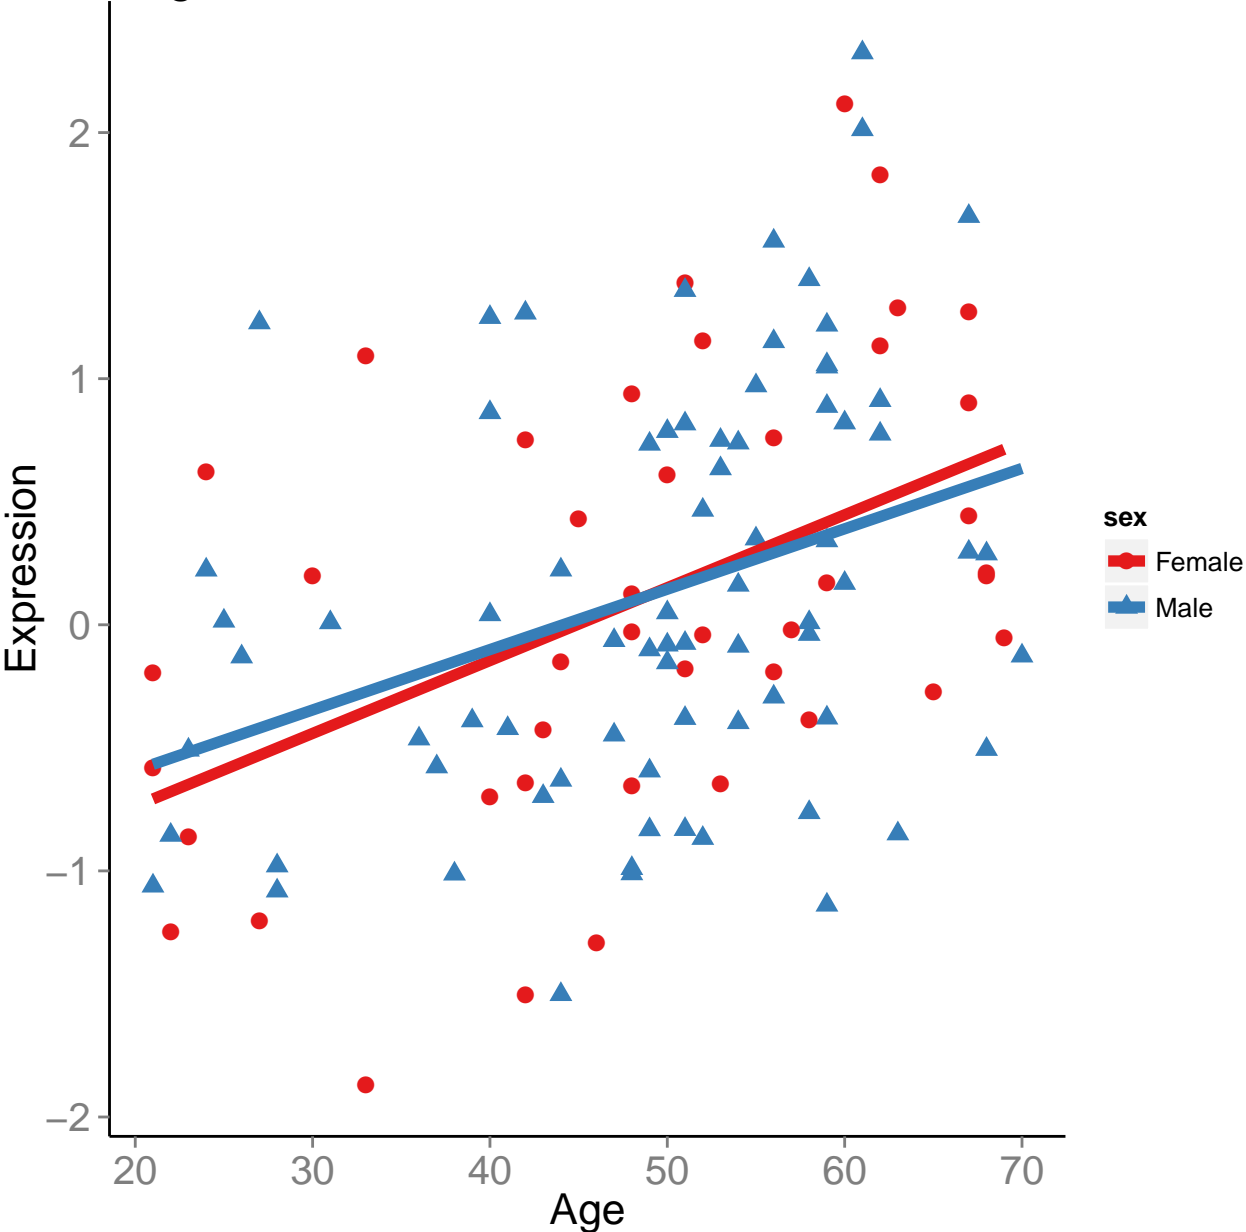

Lung: FAM83E Pearson-R=-0.40 Pval=6.67E-06

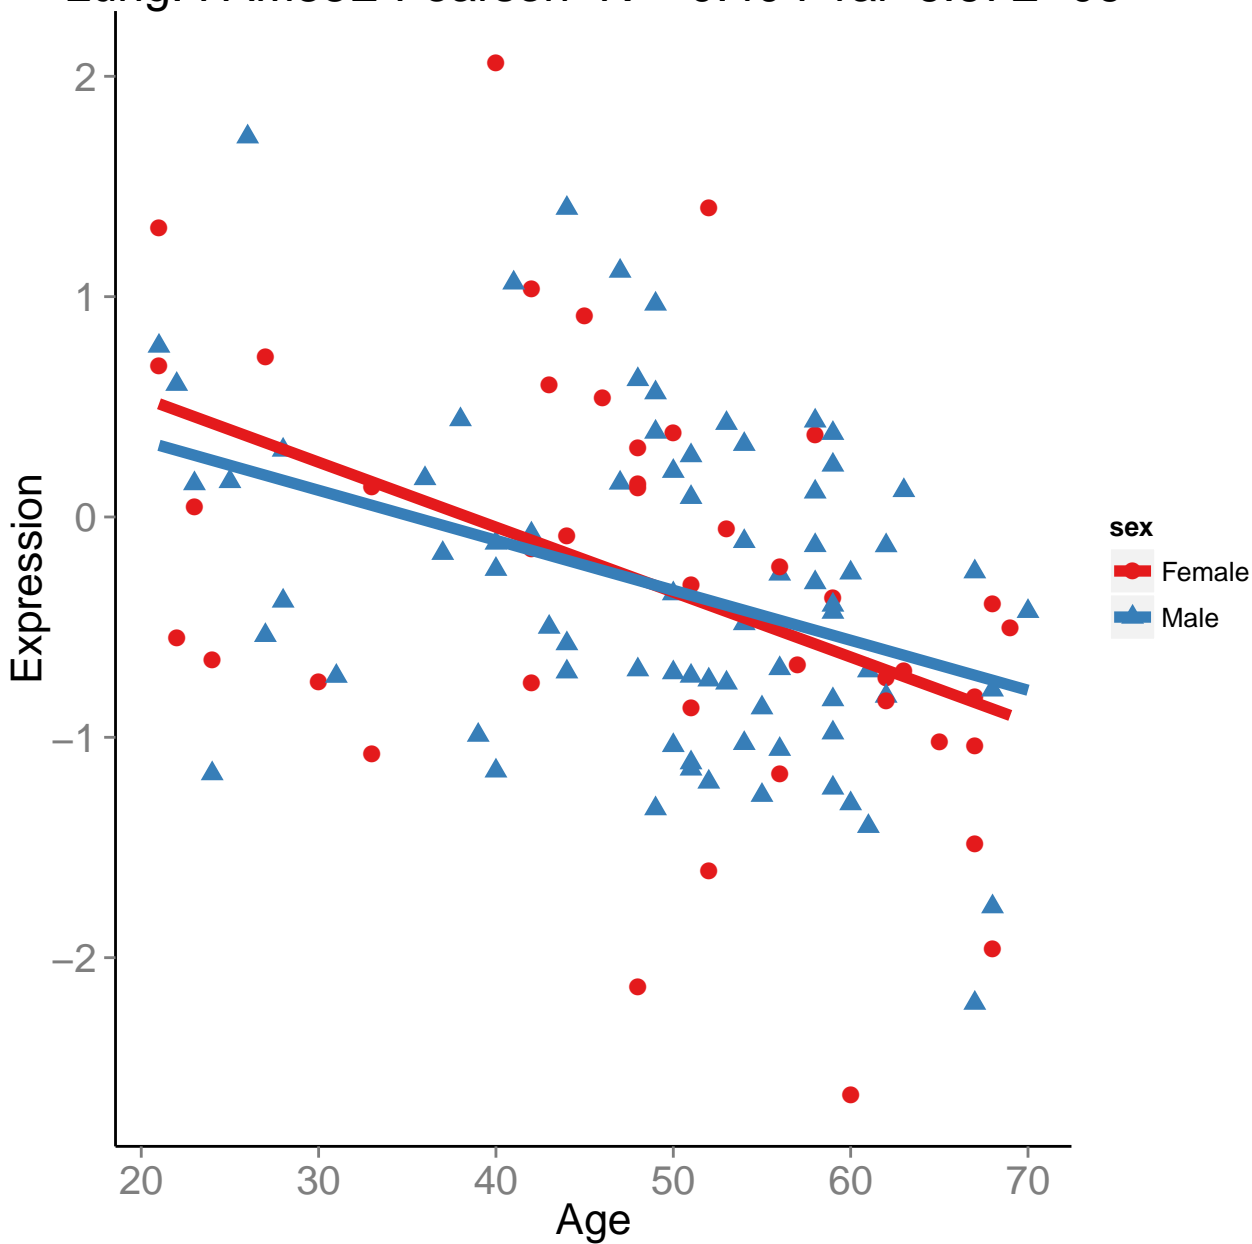

Lung: MTRR Pearson-R=-0.40 Pval=7.21E-06

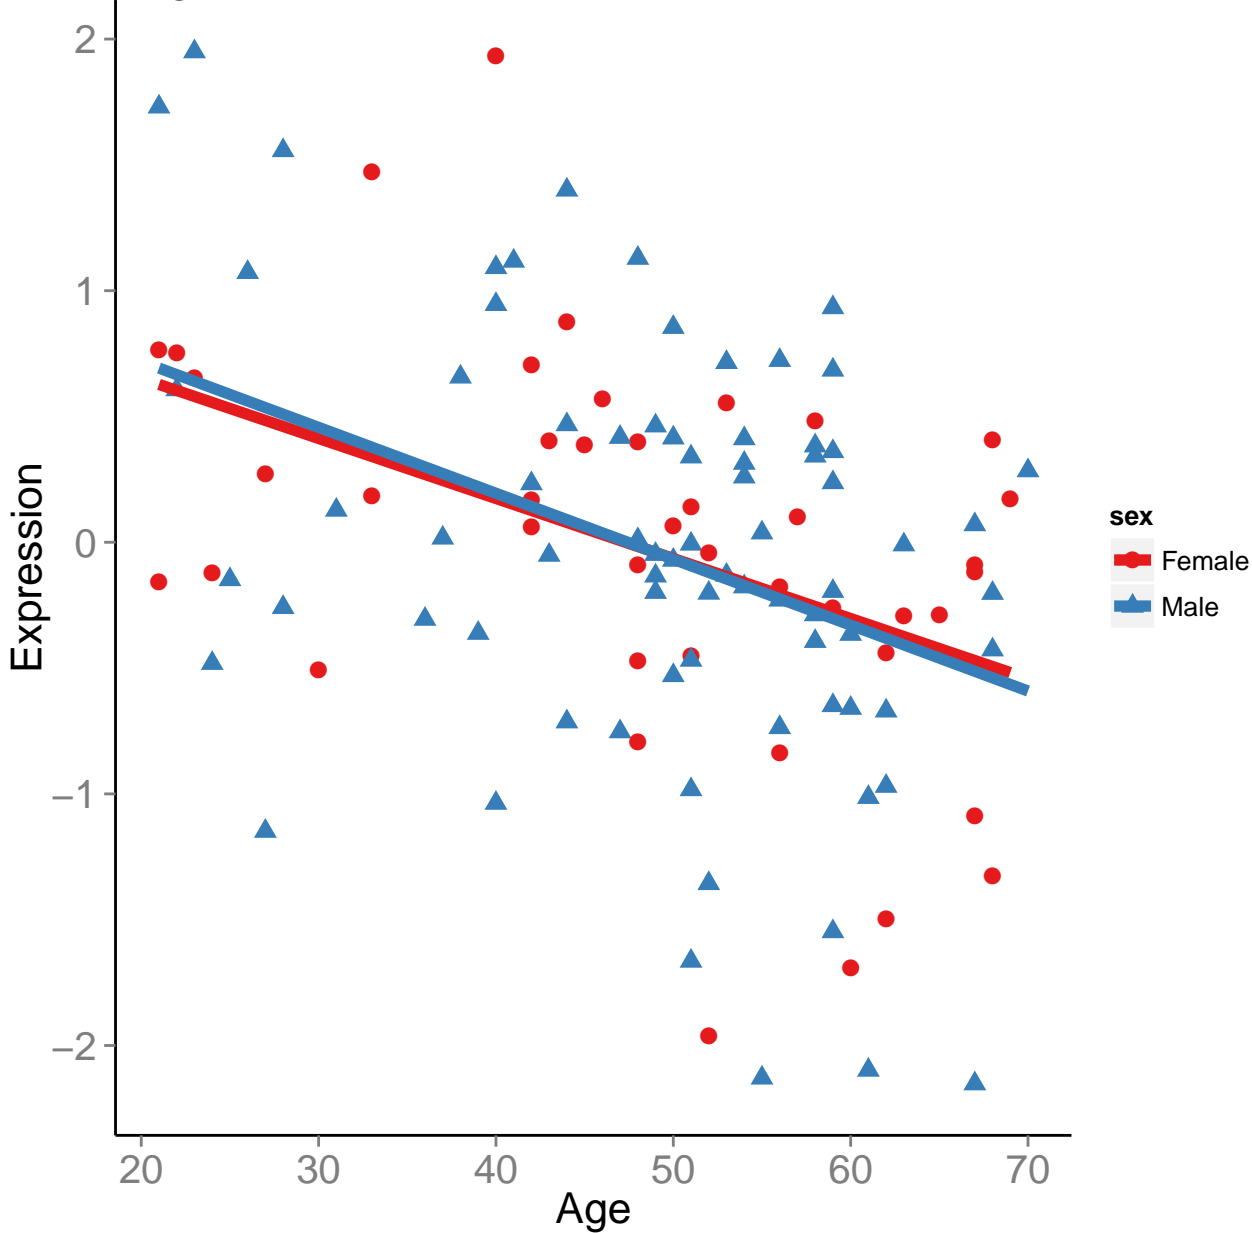

Lung: USP53 Pearson-R=0.40 Pval=7.45E-06

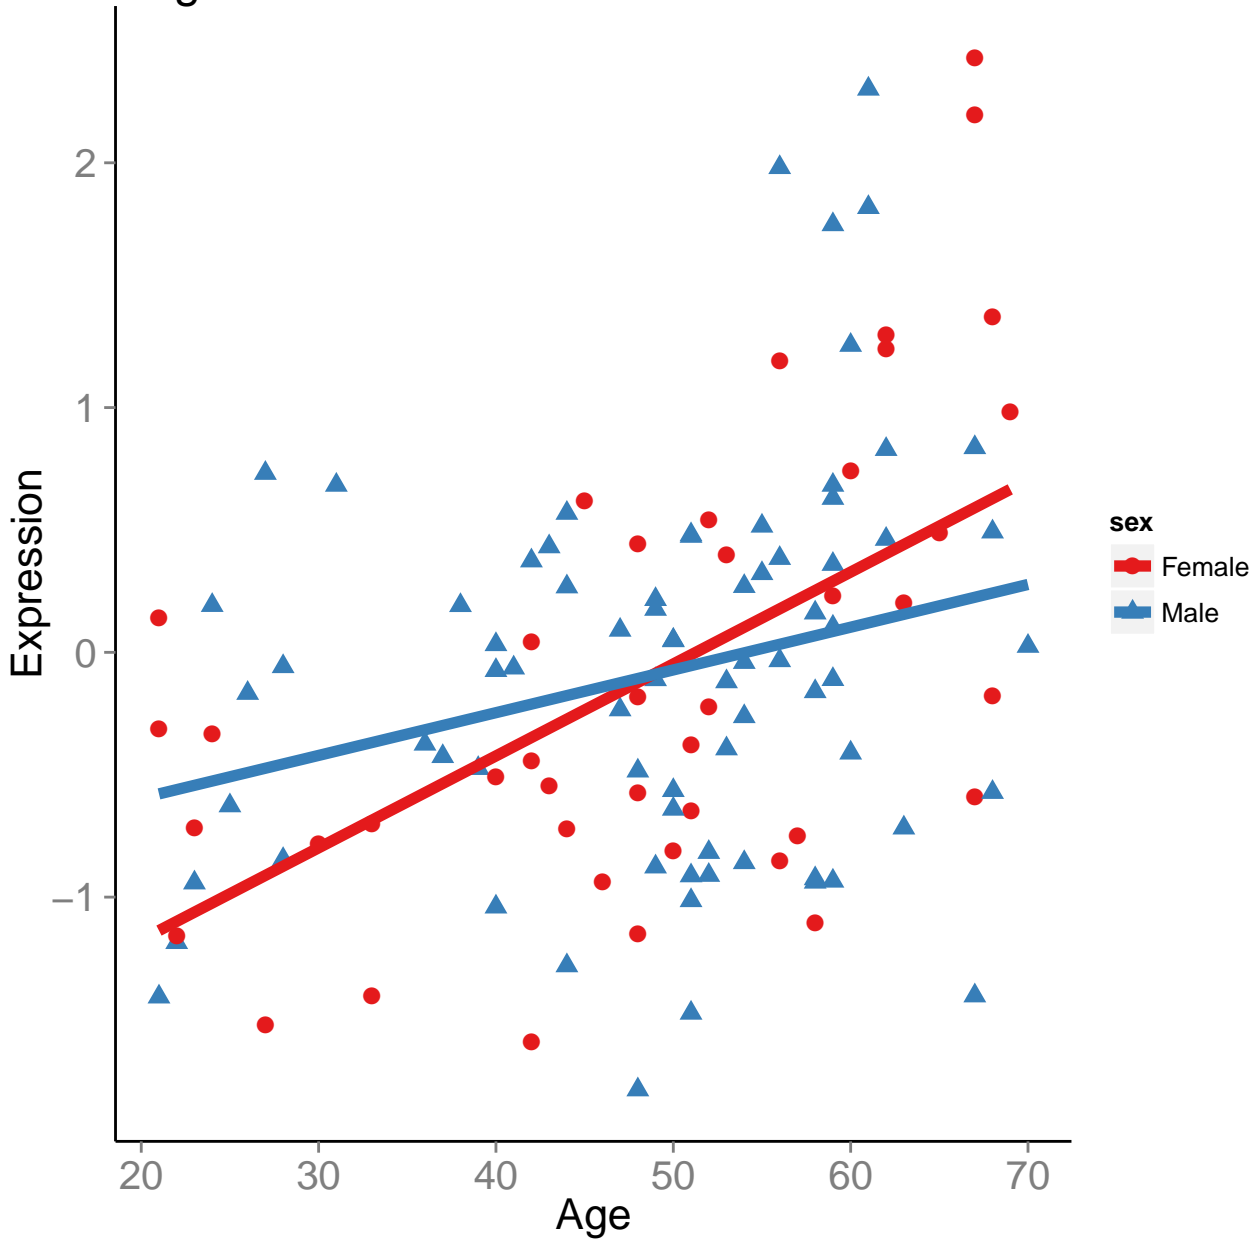



Lung: ATP2C2 Pearson-R=-0.40 Pval=7.49E-06

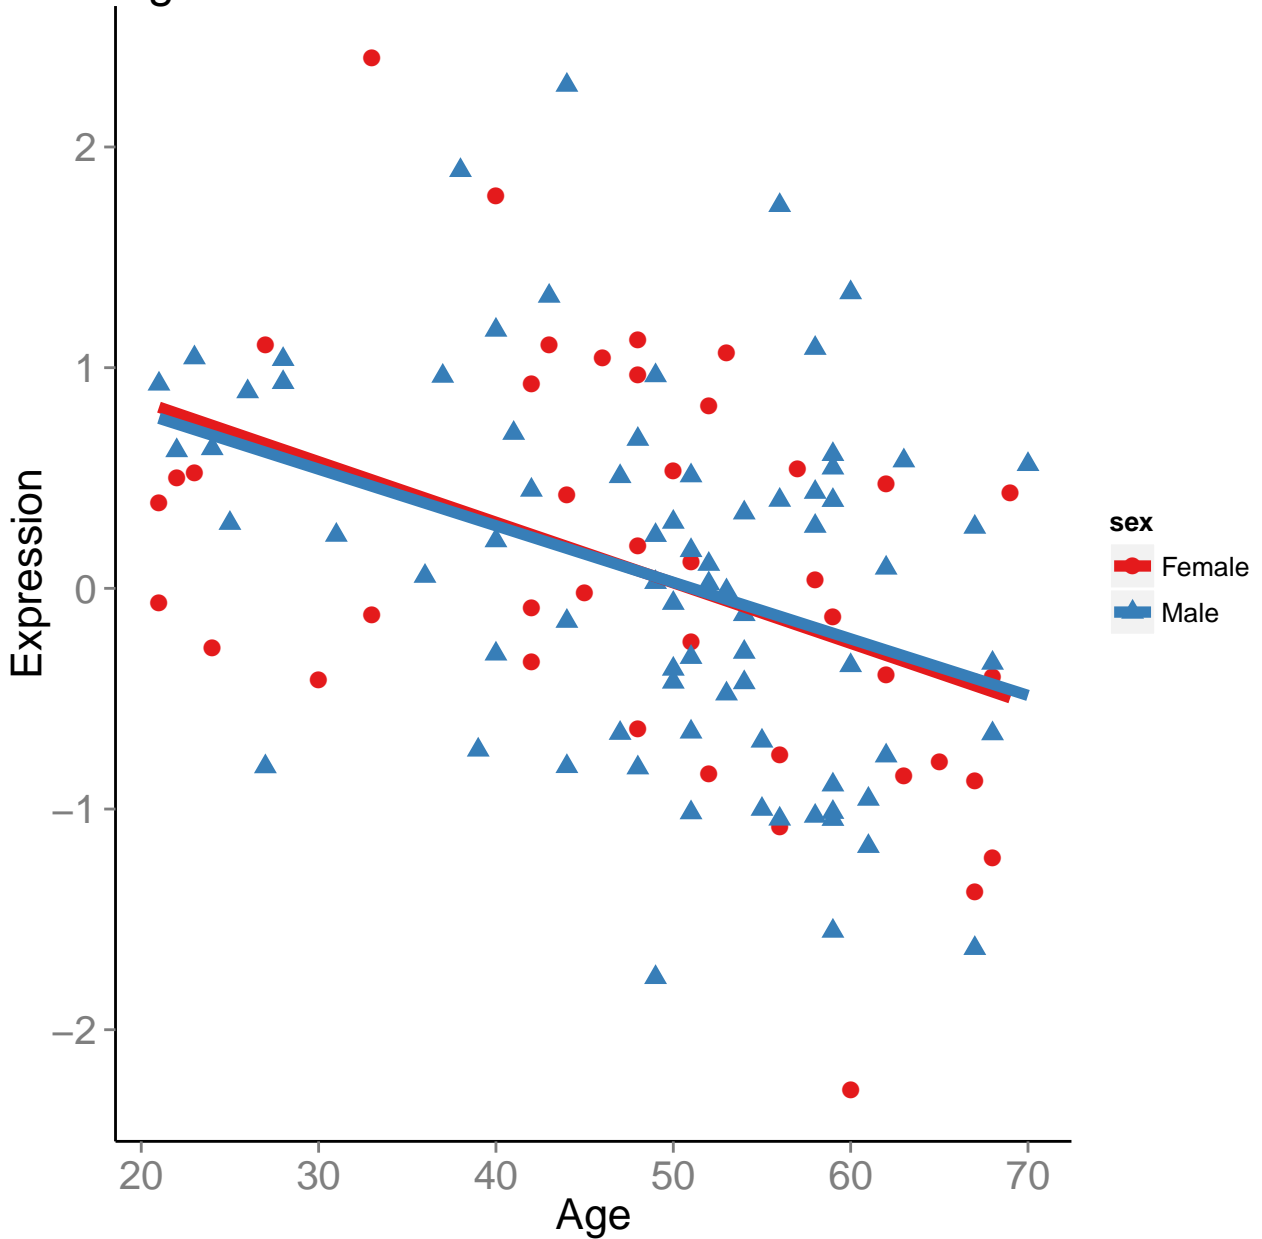

Lung: AC007970.1 Pearson-R=-0.40 Pval=8.30E-06

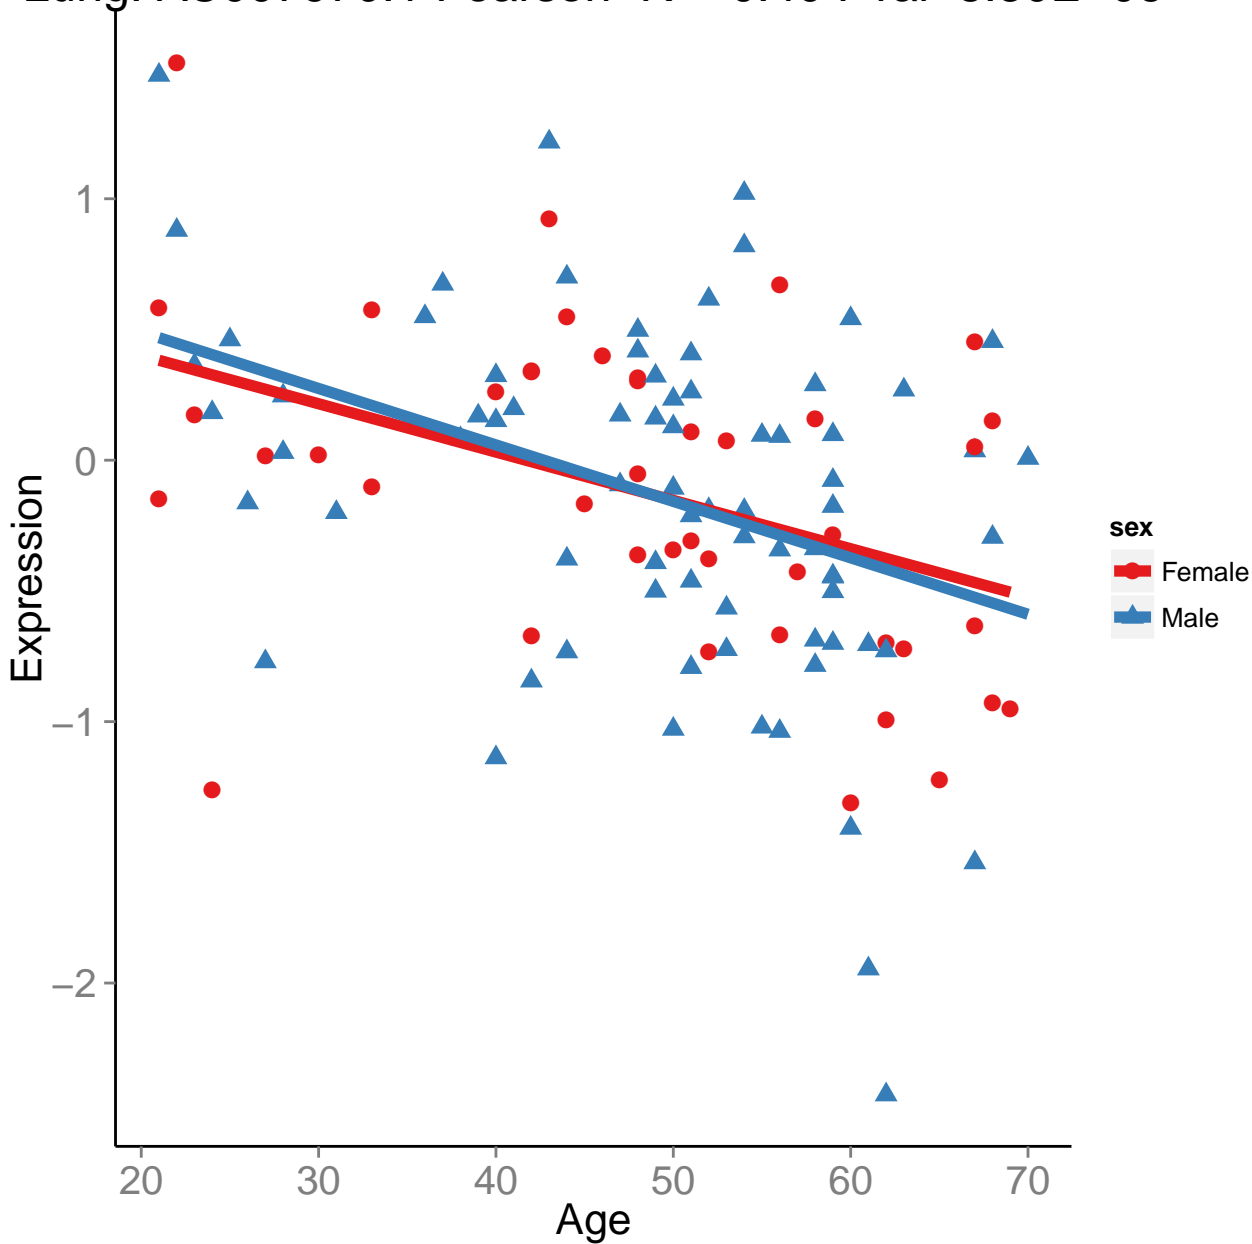

Lung: EBF1 Pearson-R=0.40 Pval=8.48E-06

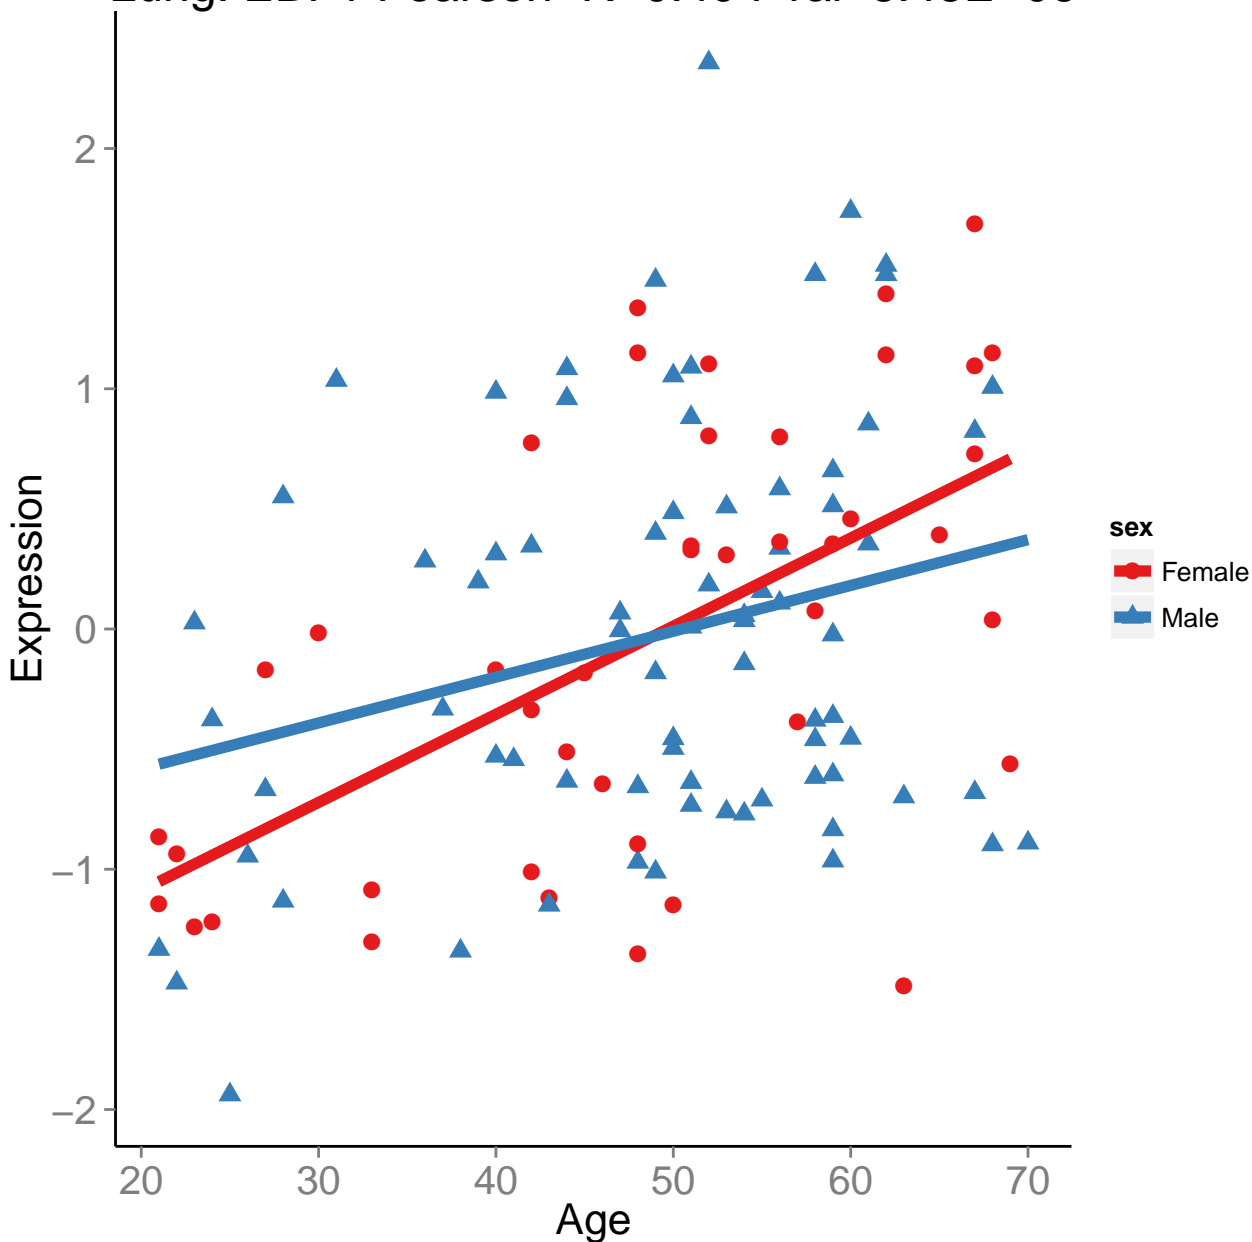

Lung: SNX5 Pearson-R=-0.39 Pval=8.83E-06

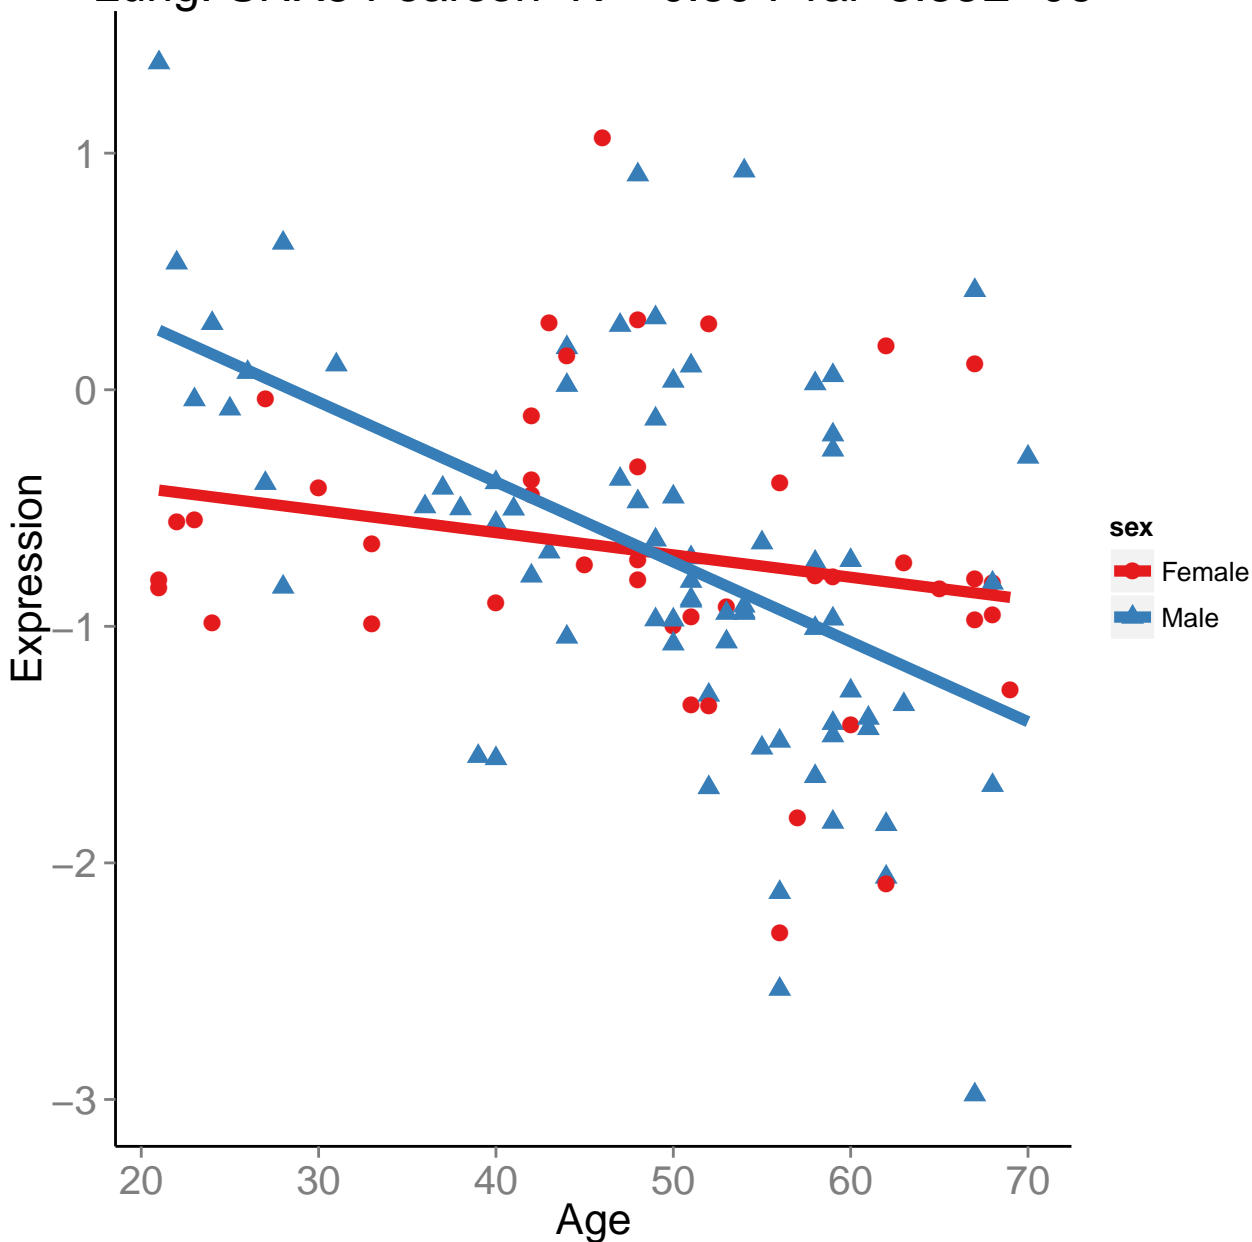

Lung: PEX3 Pearson-R=-0.39 Pval=9.04E-06

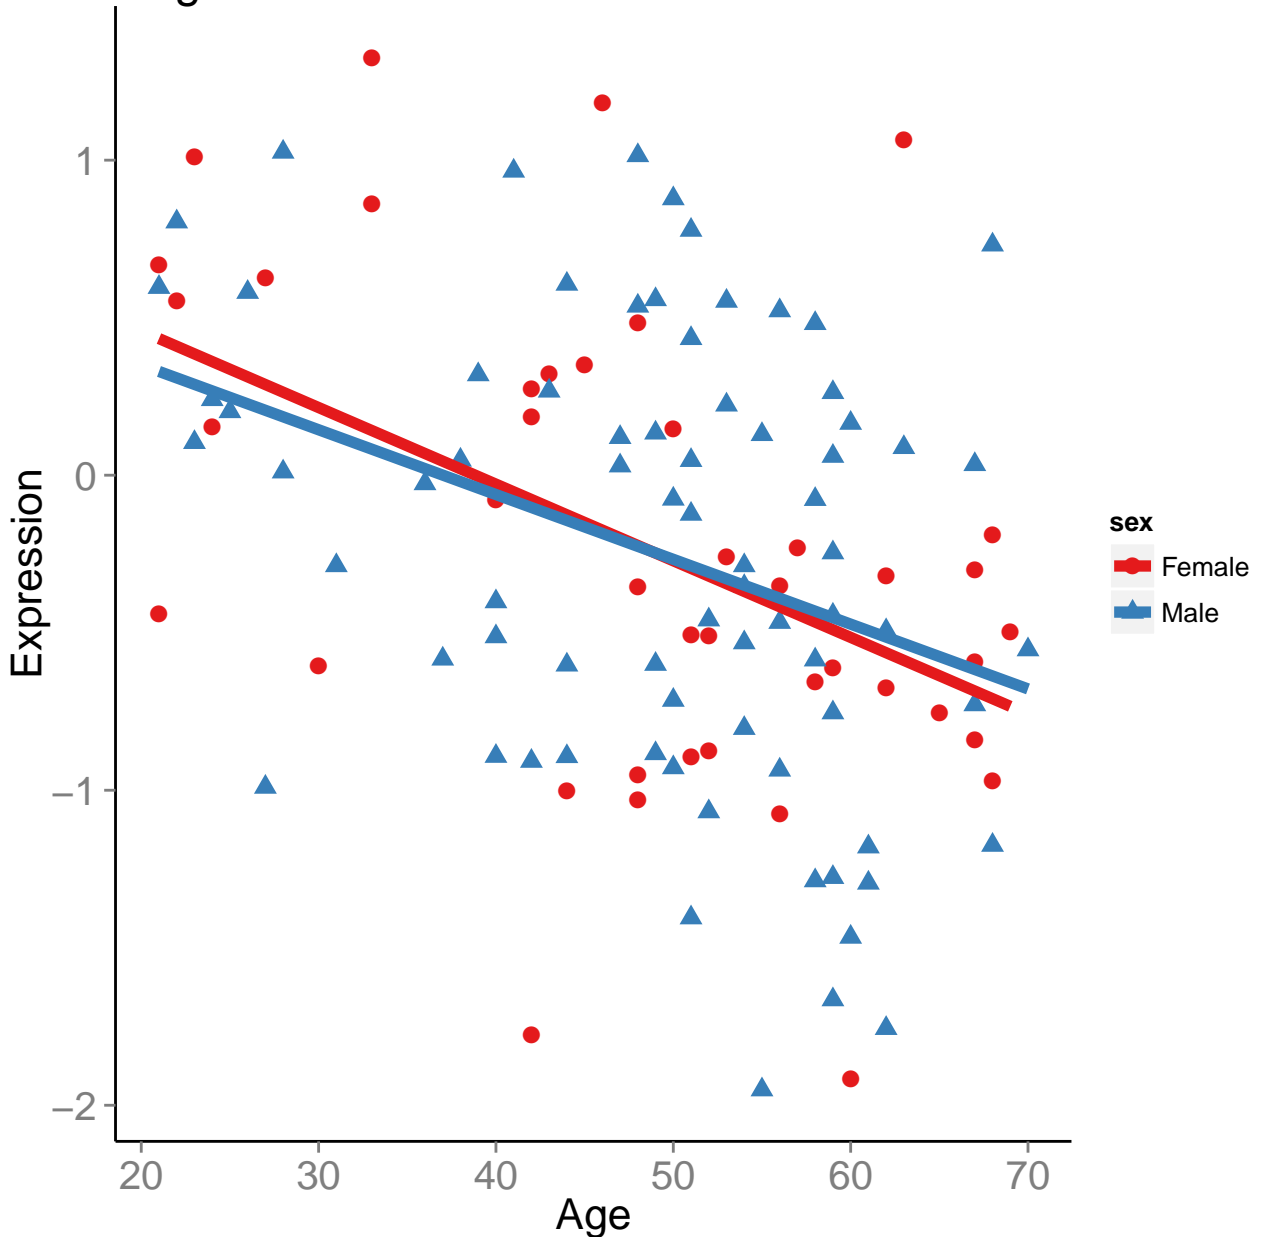

Lung: HSPB6 Pearson-R=0.39 Pval=9.60E-06

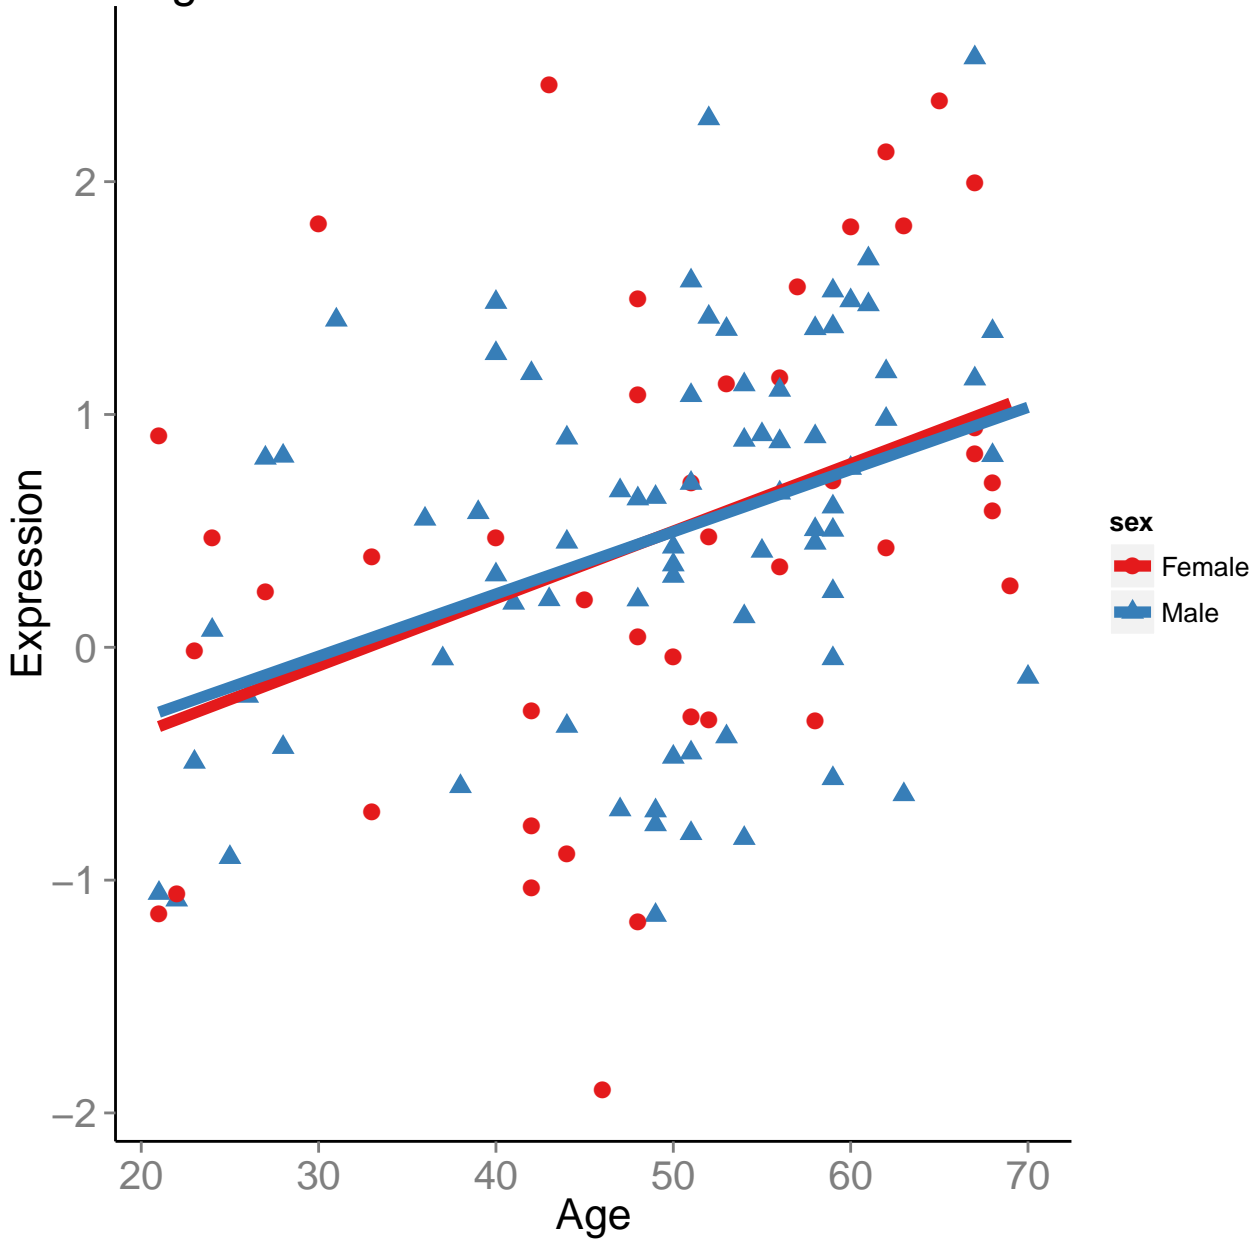

Lung: PKD2 Pearson-R=0.39 Pval=1.03E-05

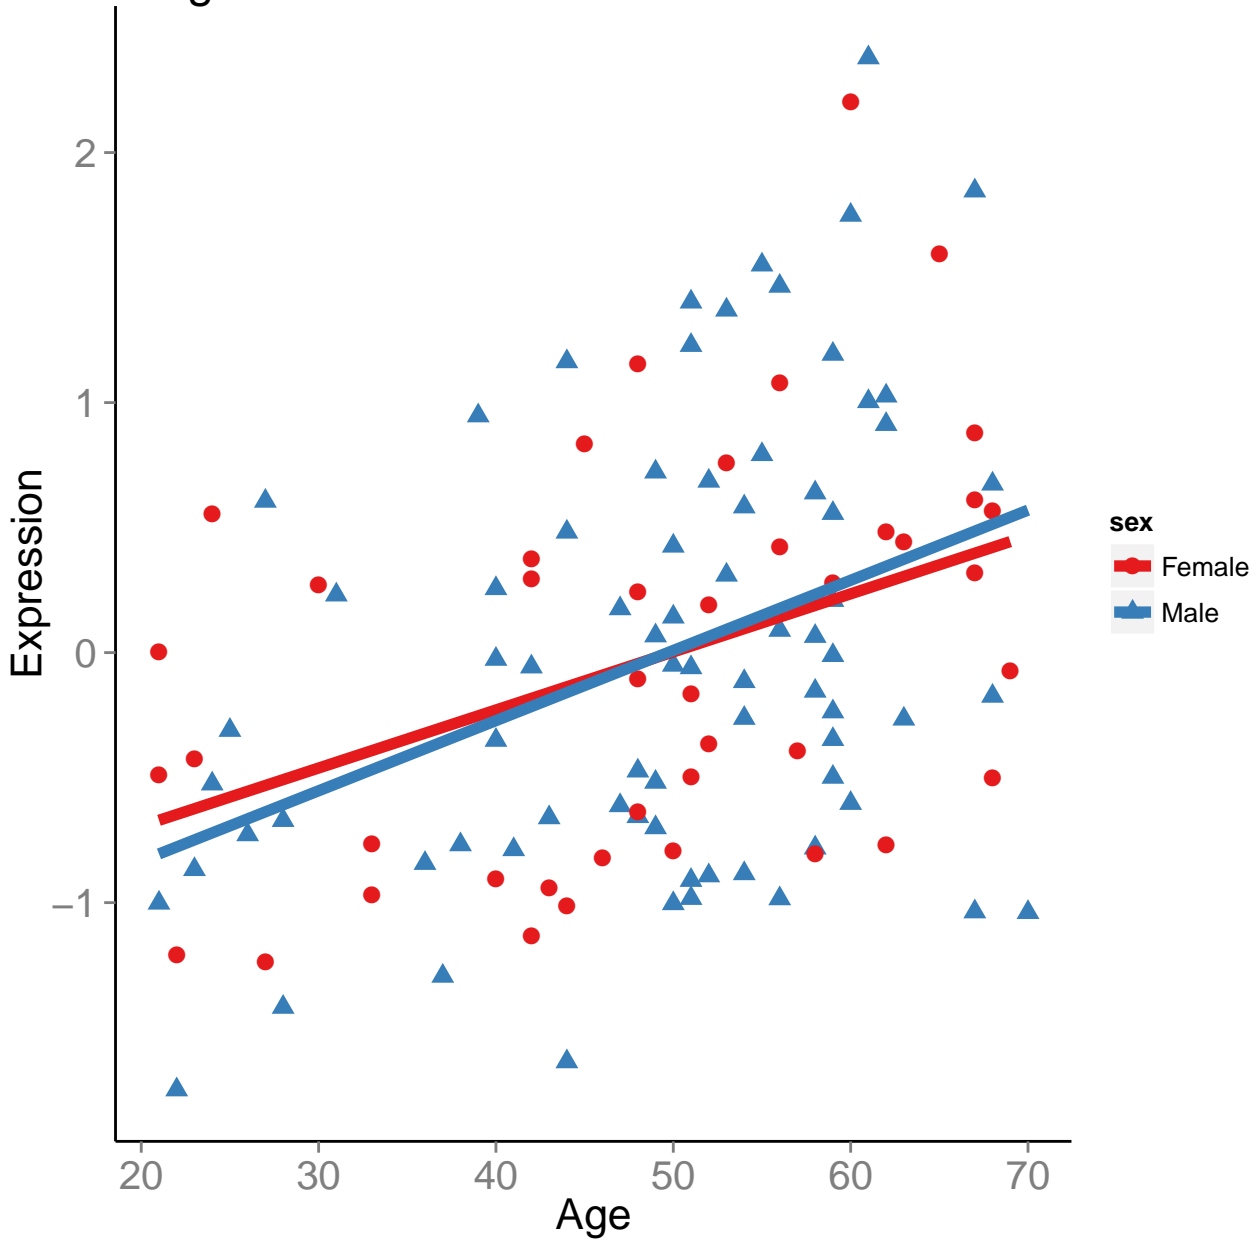

Lung: ASAP1 Pearson-R=0.39 Pval=1.03E-05

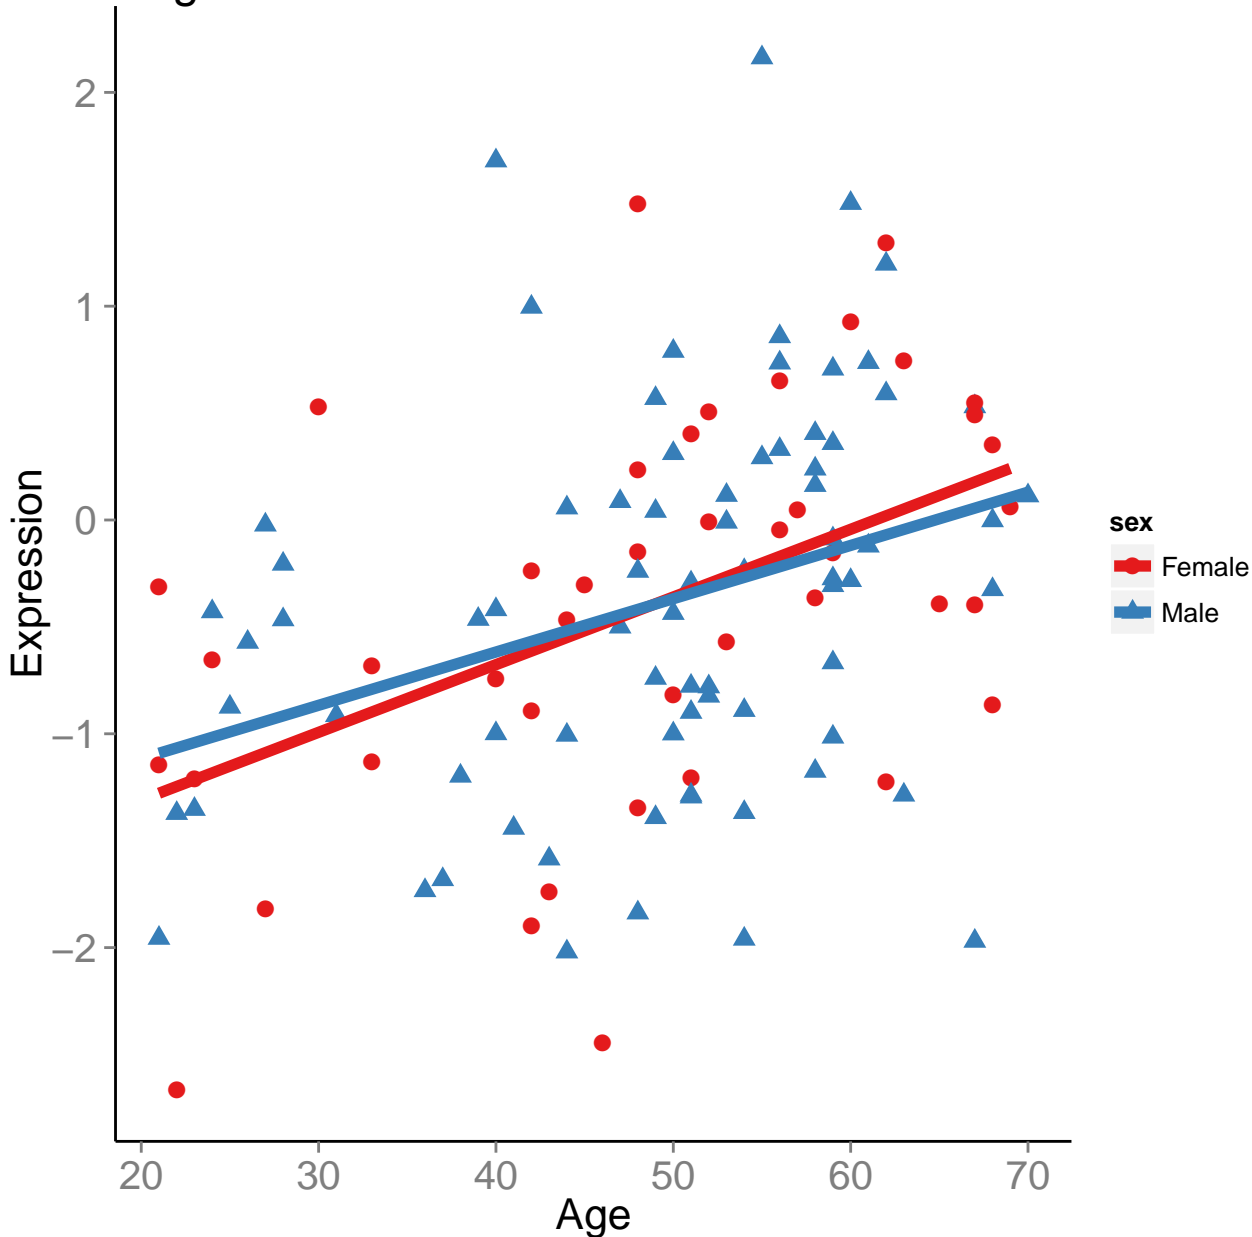



Lung: RAI2 Pearson-R=0.39 Pval=1.13E-05

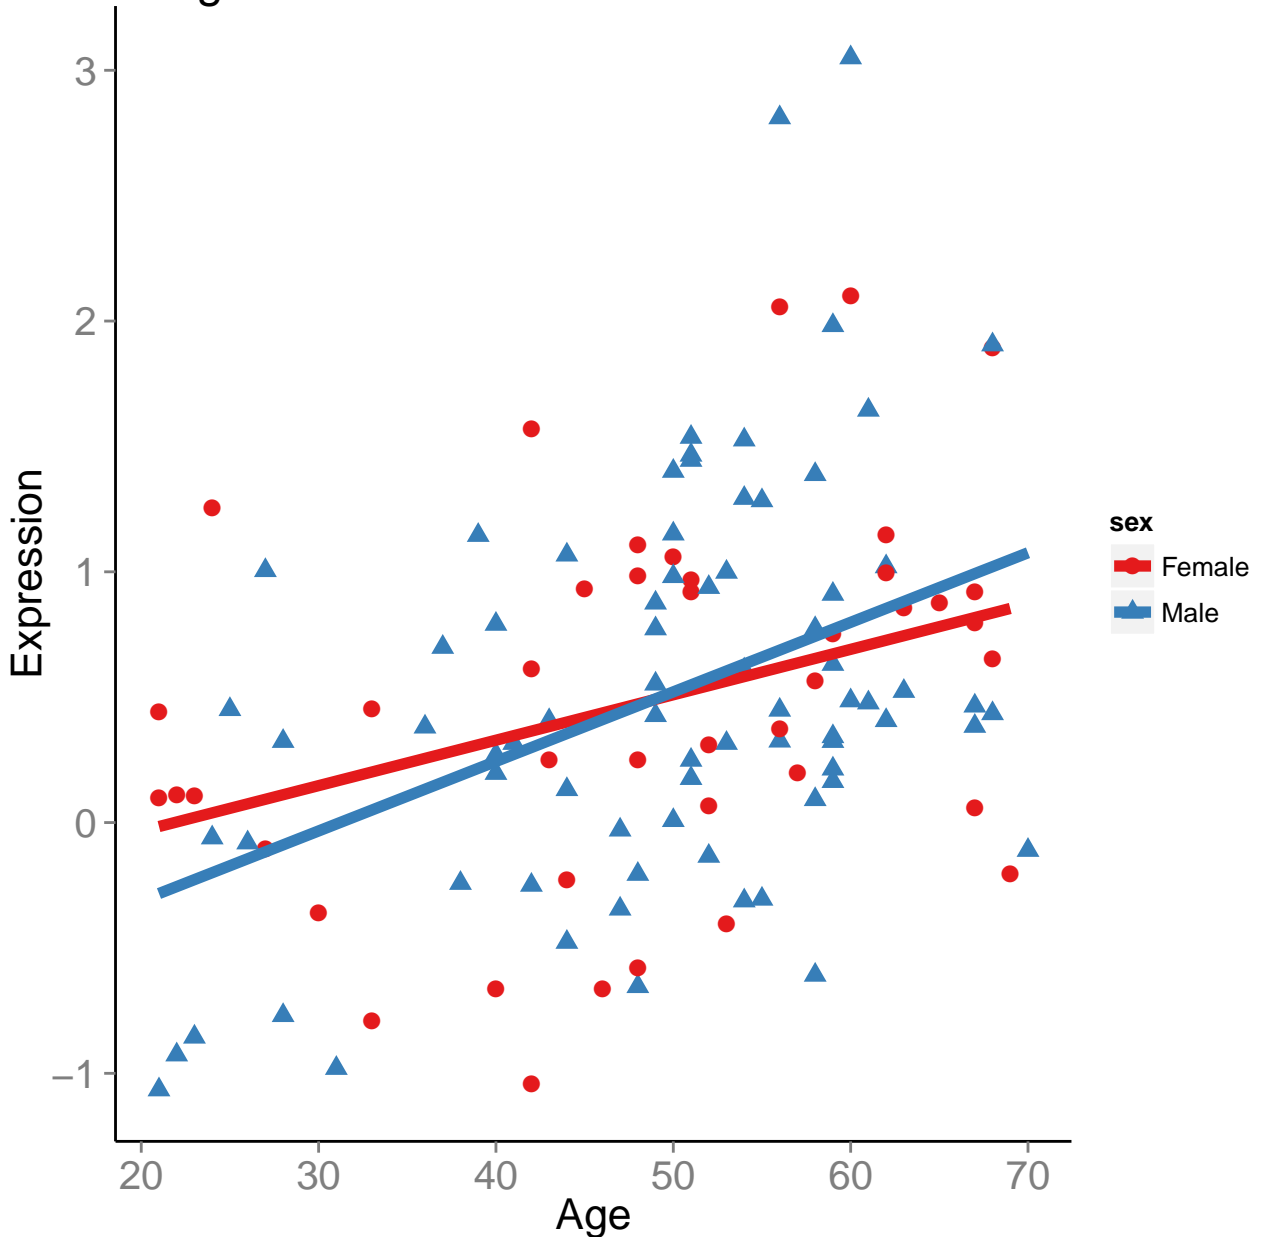

Lung: Z98256.1 Pearson-R=0.39 Pval=1.14E-05

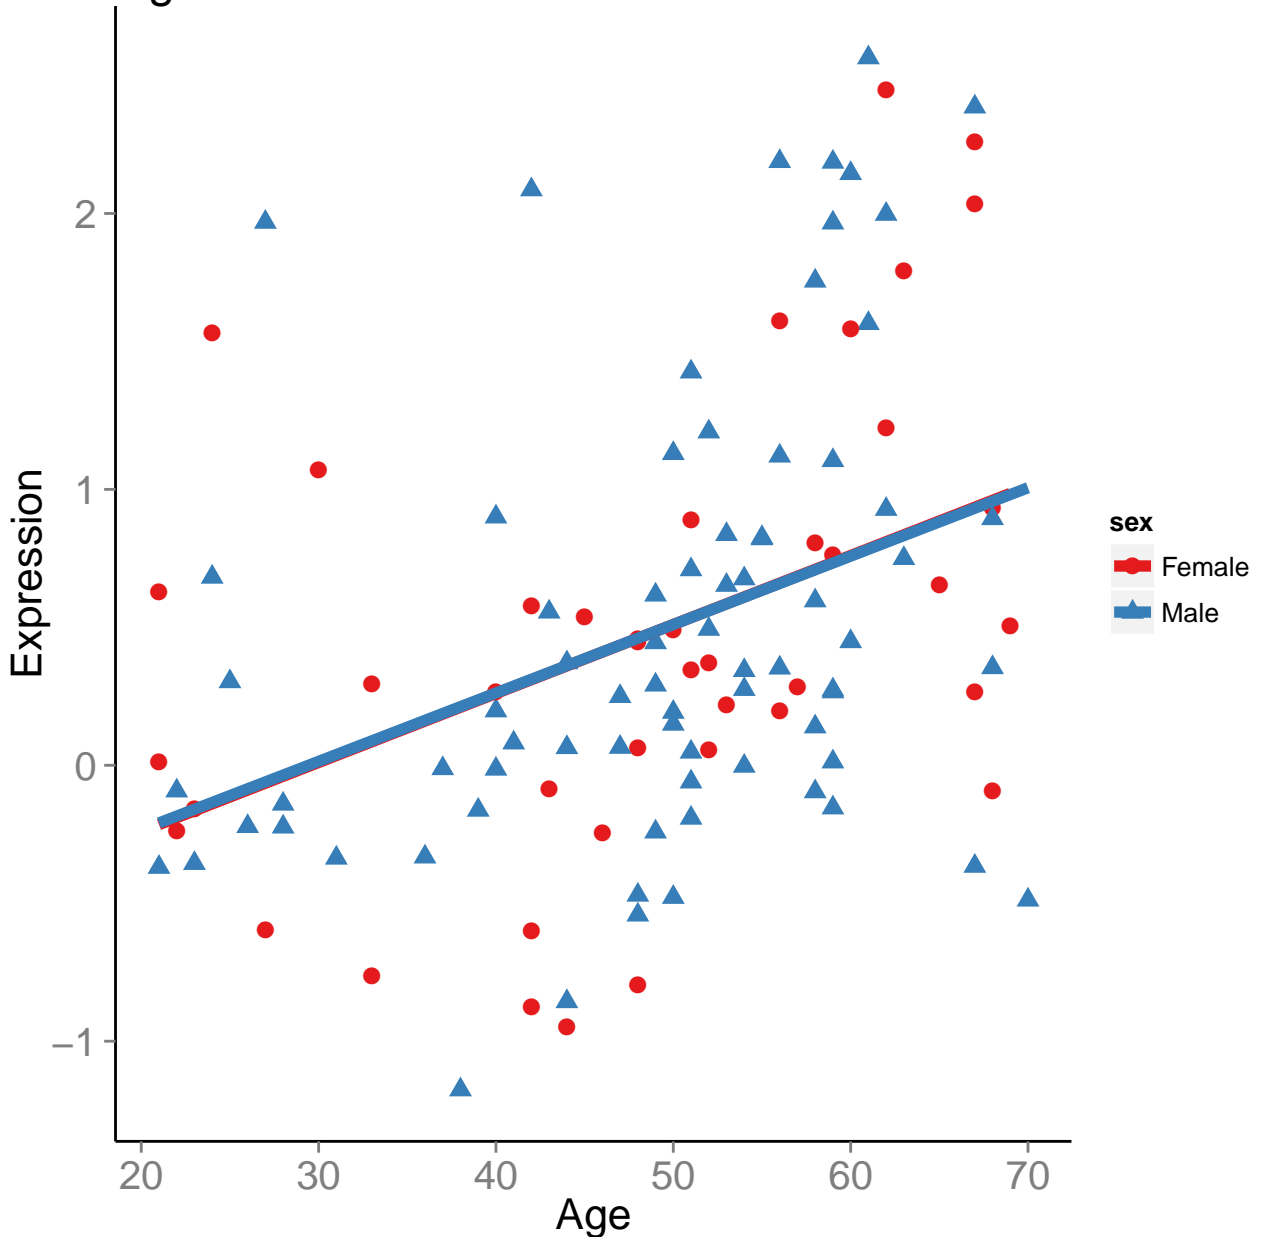

Lung: SNX30 Pearson-R=-0.39 Pval=1.12E-05

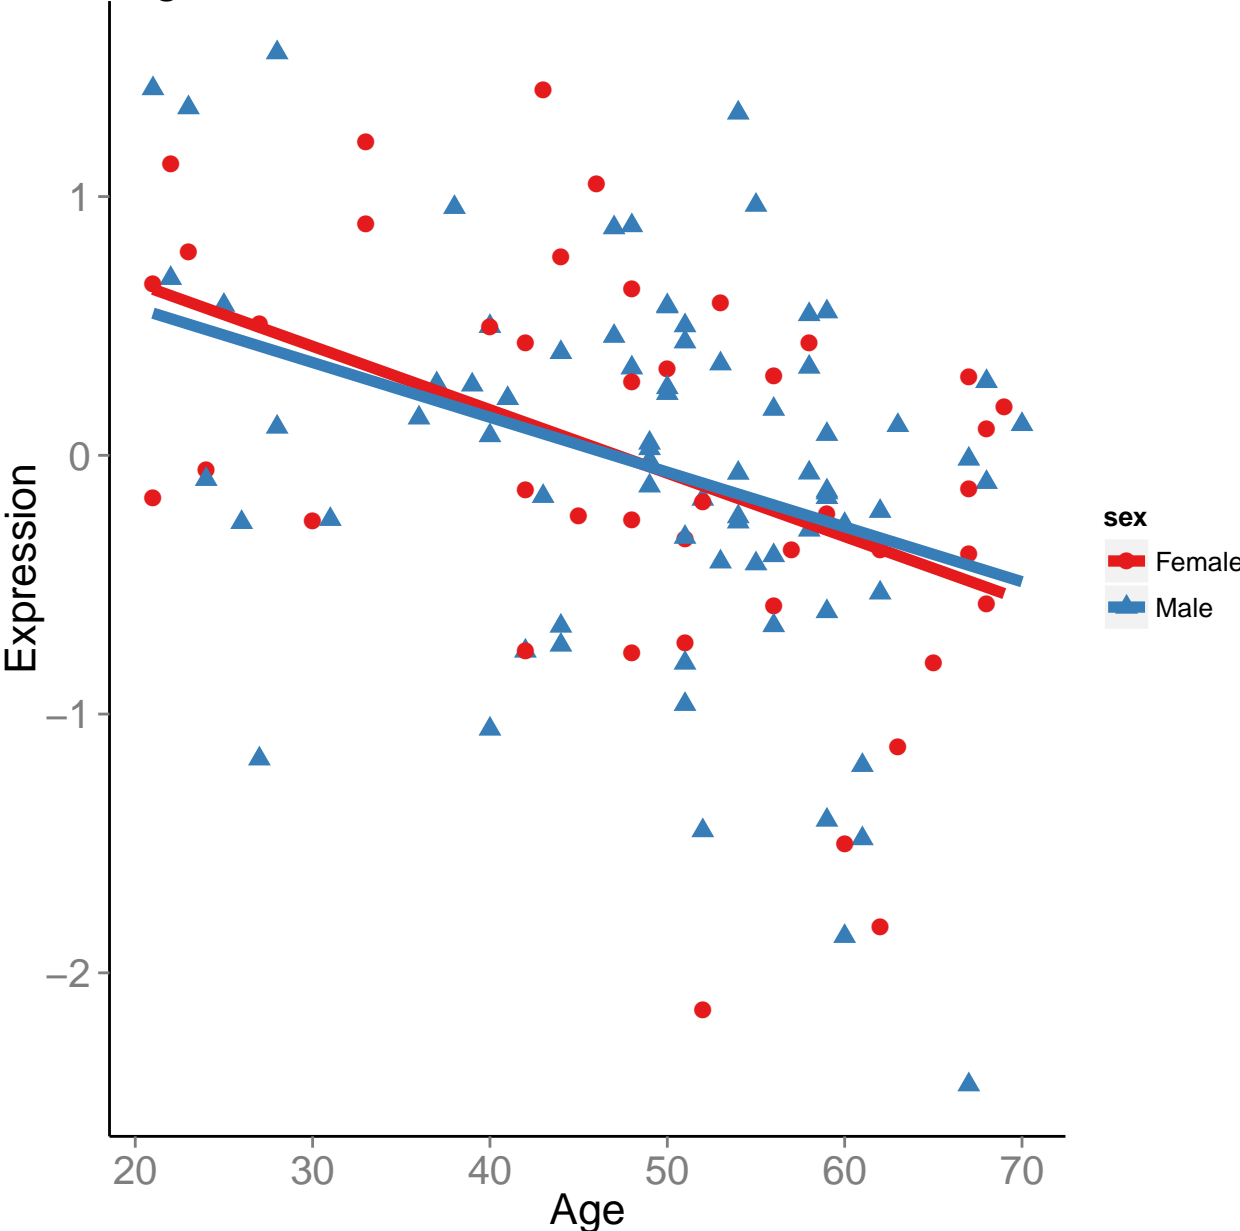

Lung: FAM184A Pearson-R=-0.39 Pval=1.17E-05

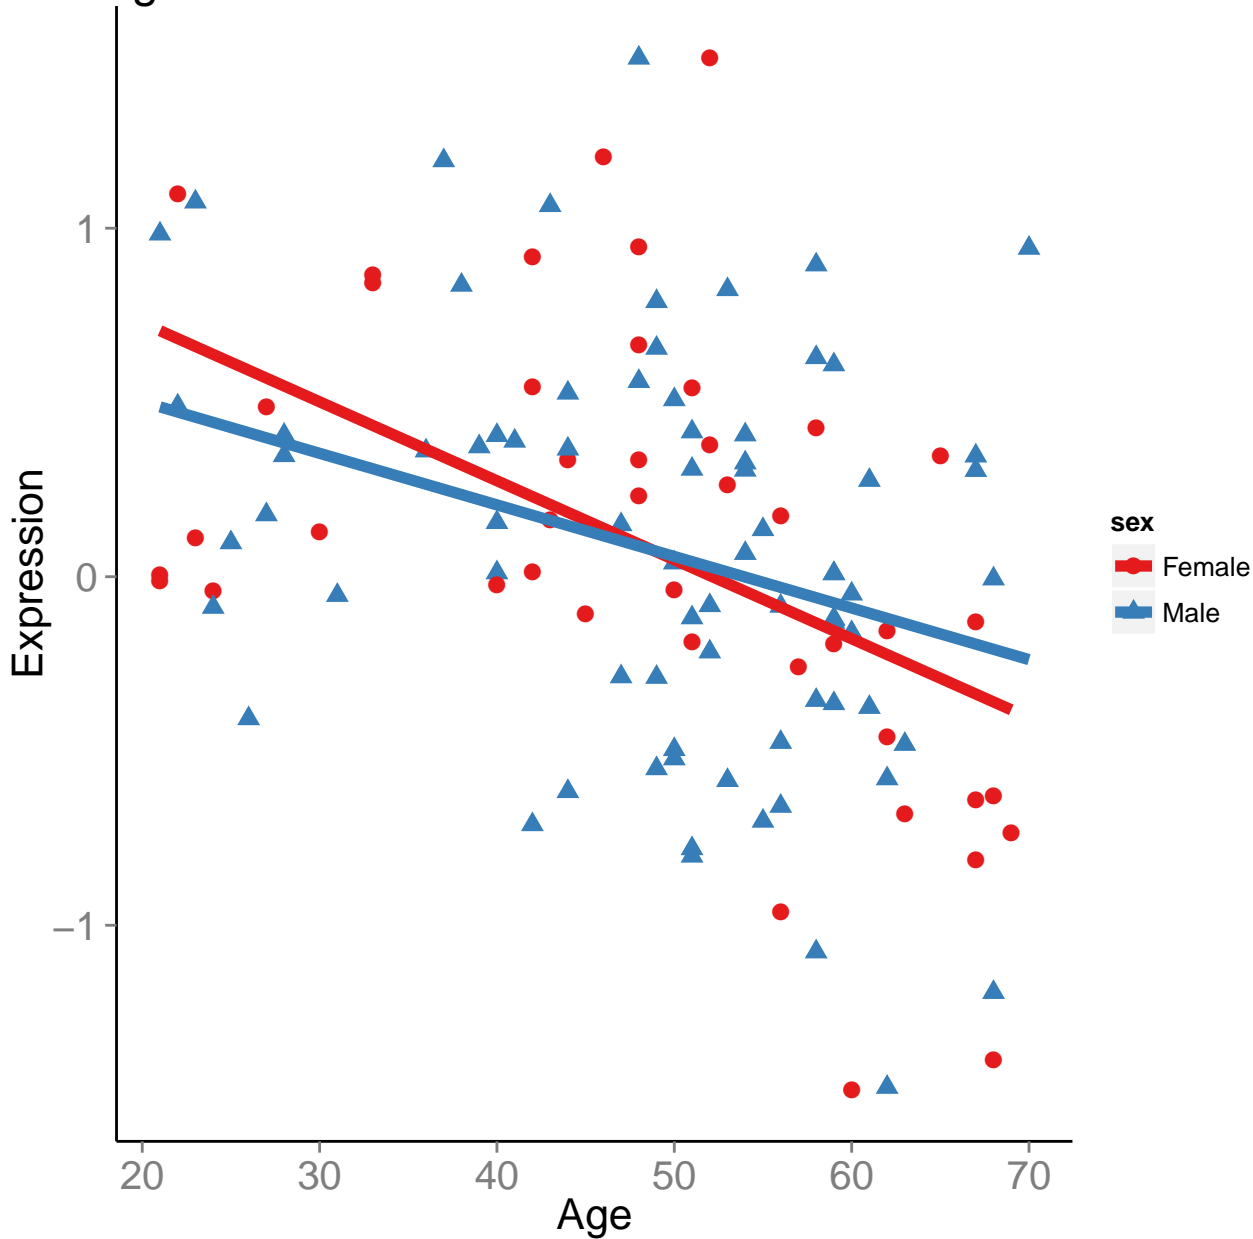

Lung: CALCOCO2 Pearson-R=0.39 Pval=1.32E-05

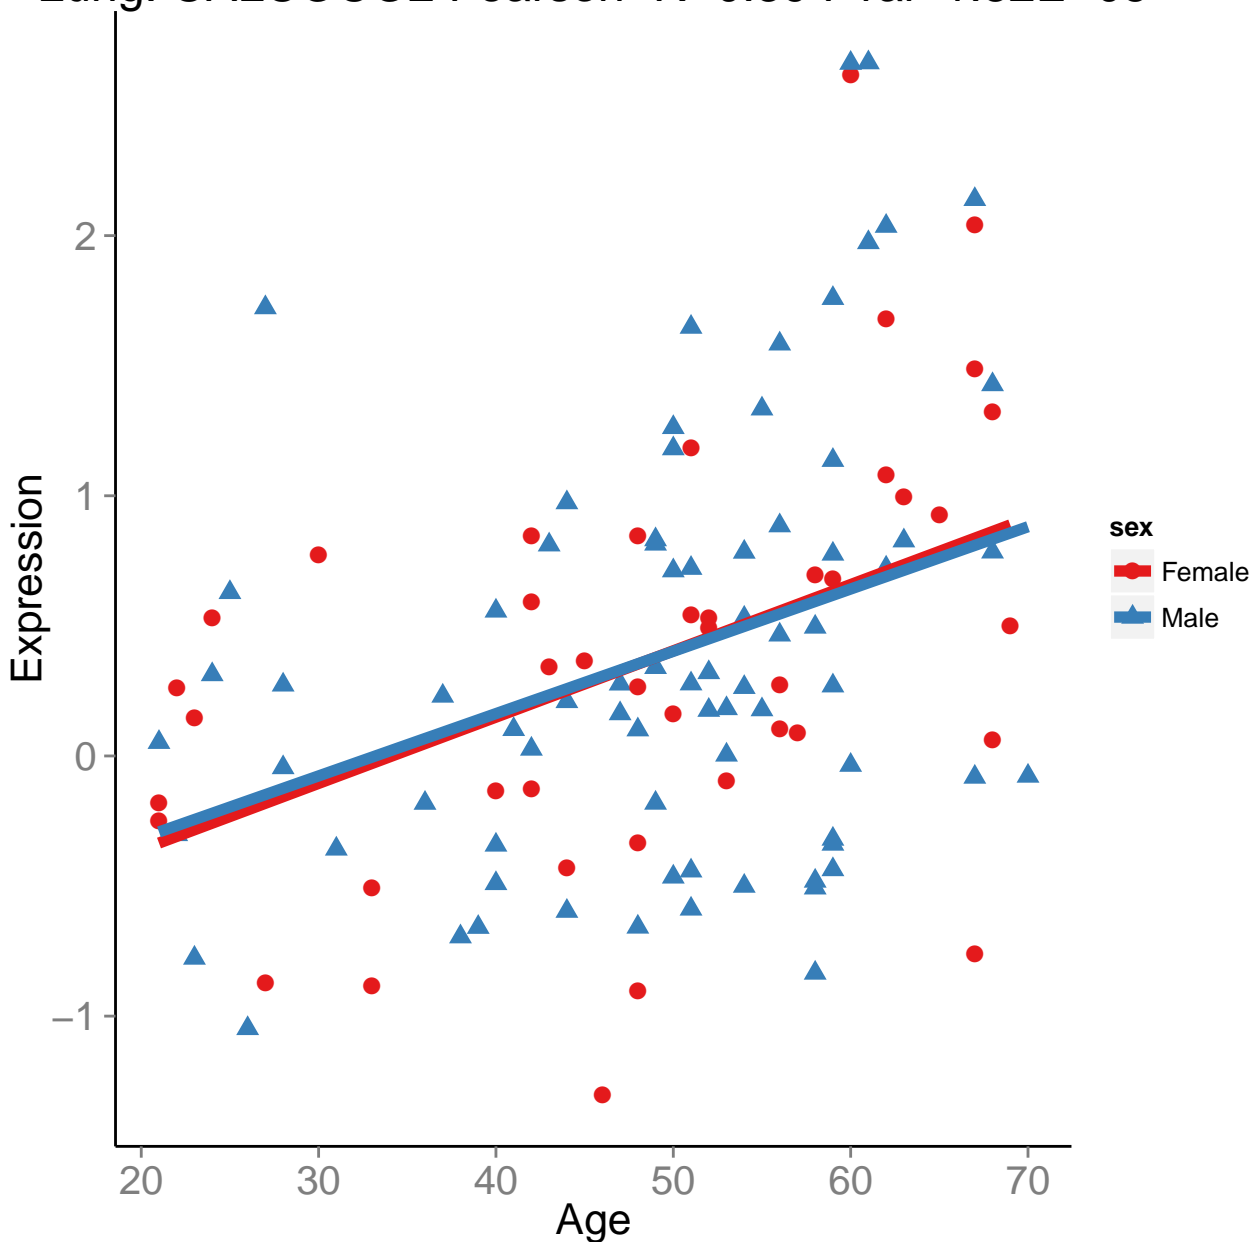

Lung: YTHDF2 Pearson-R=-0.39 Pval=1.23E-05

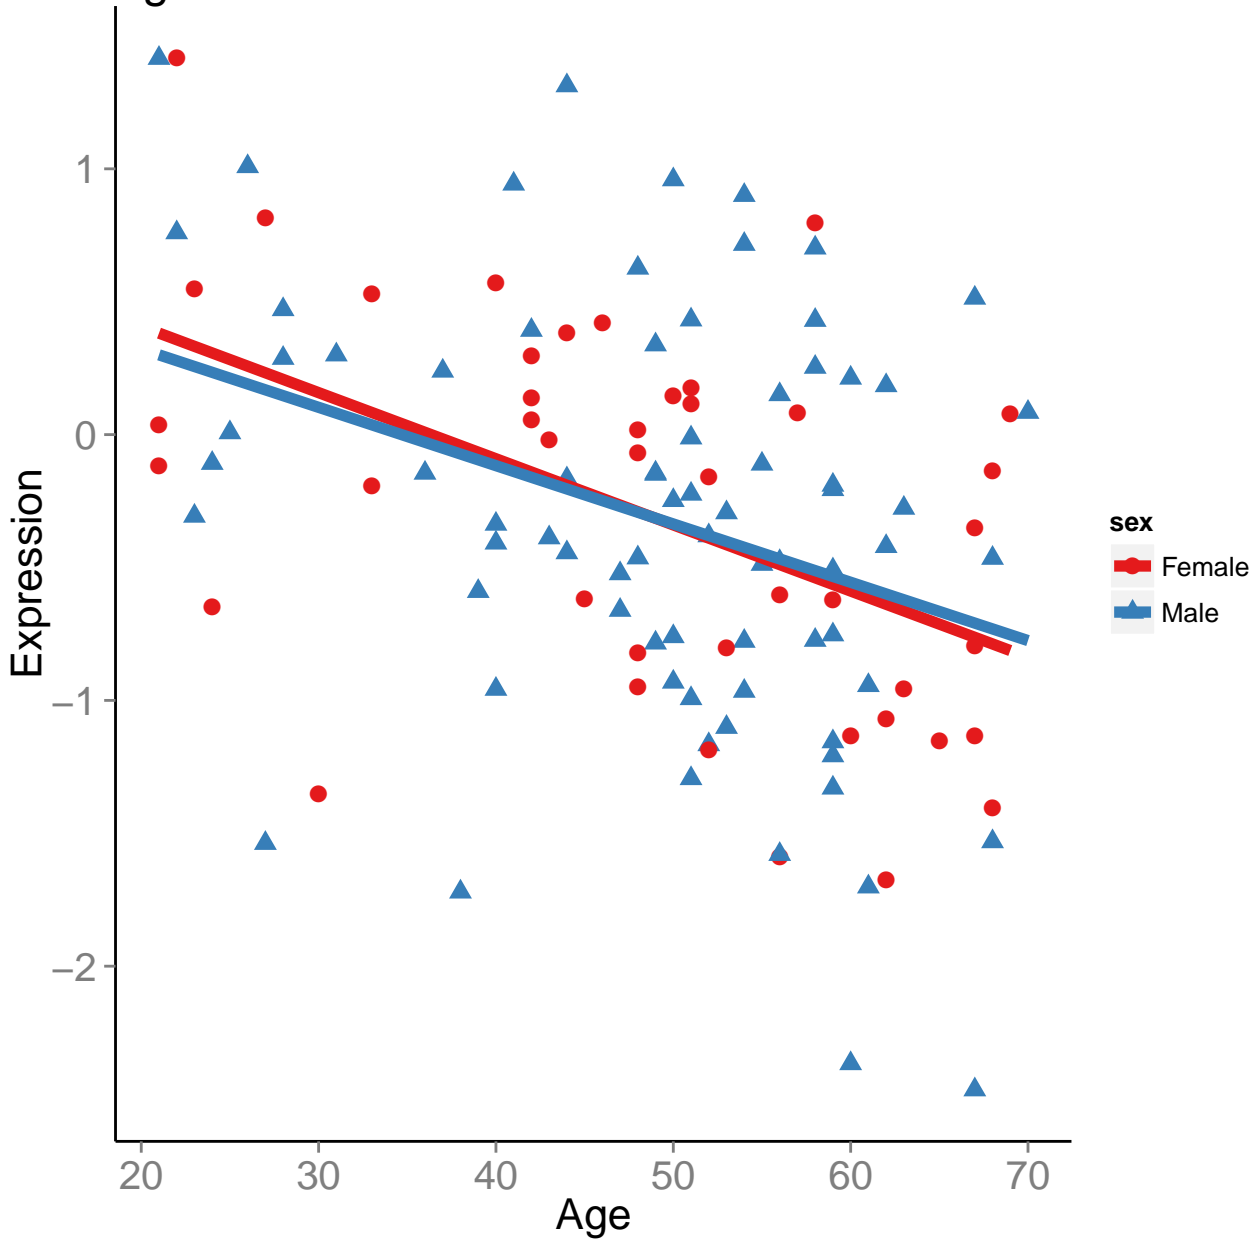

Lung: ATP10D Pearson-R=0.39 Pval=1.30E-05

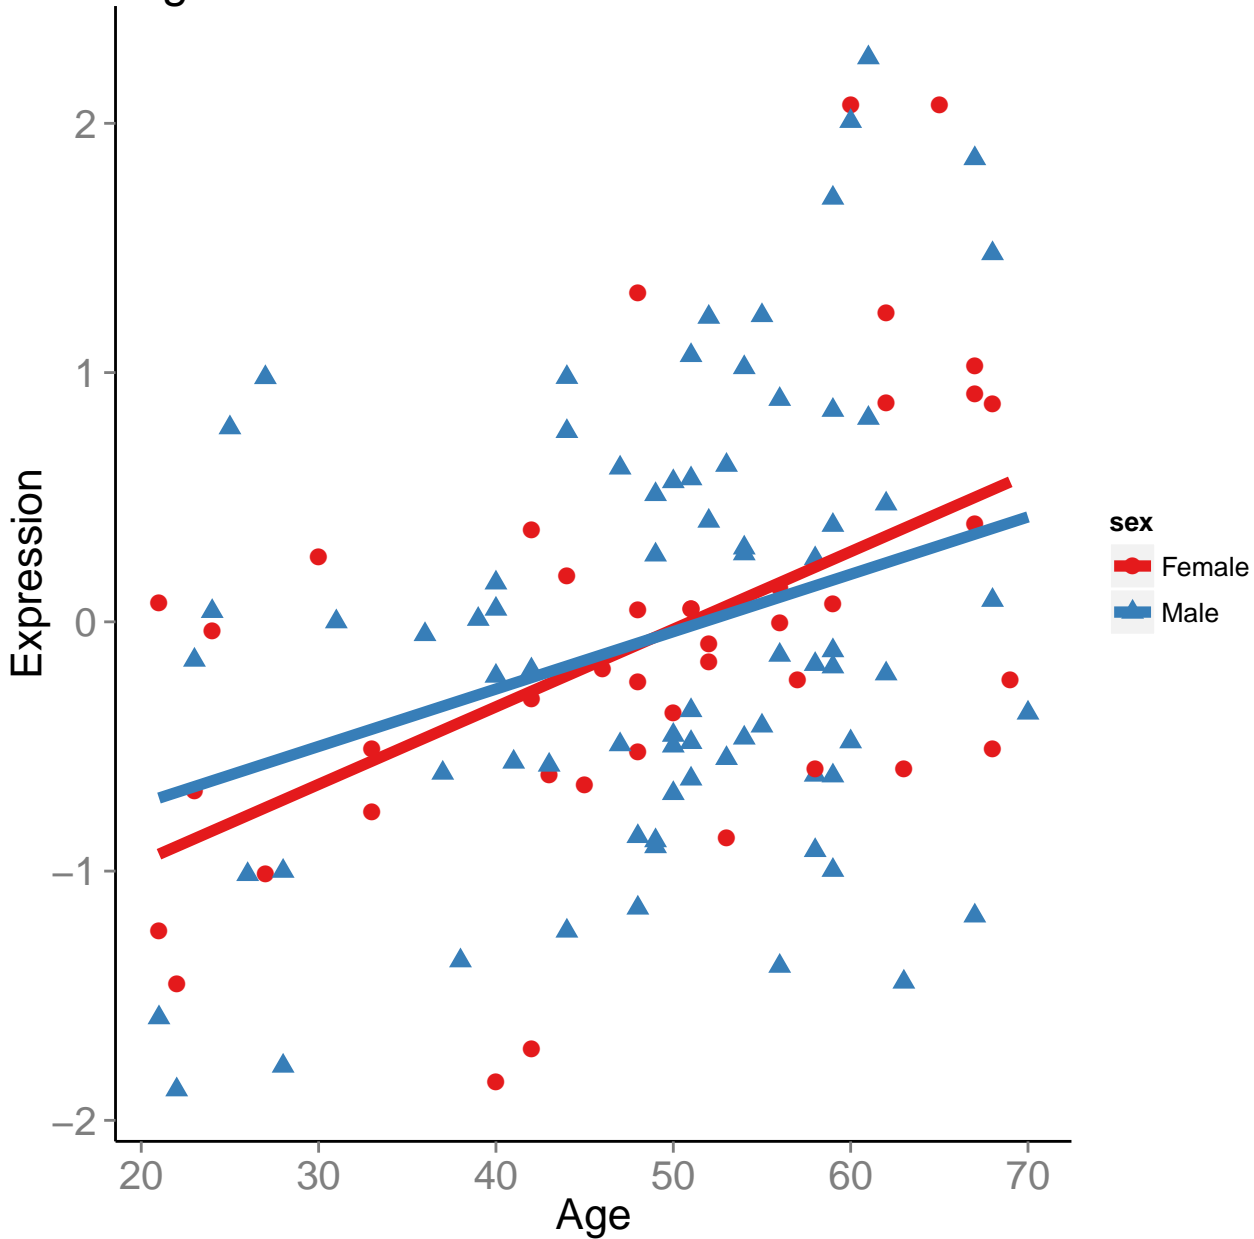

Lung: RP11-615l2.7 Pearson-R=0.39 Pval=1.20E-05

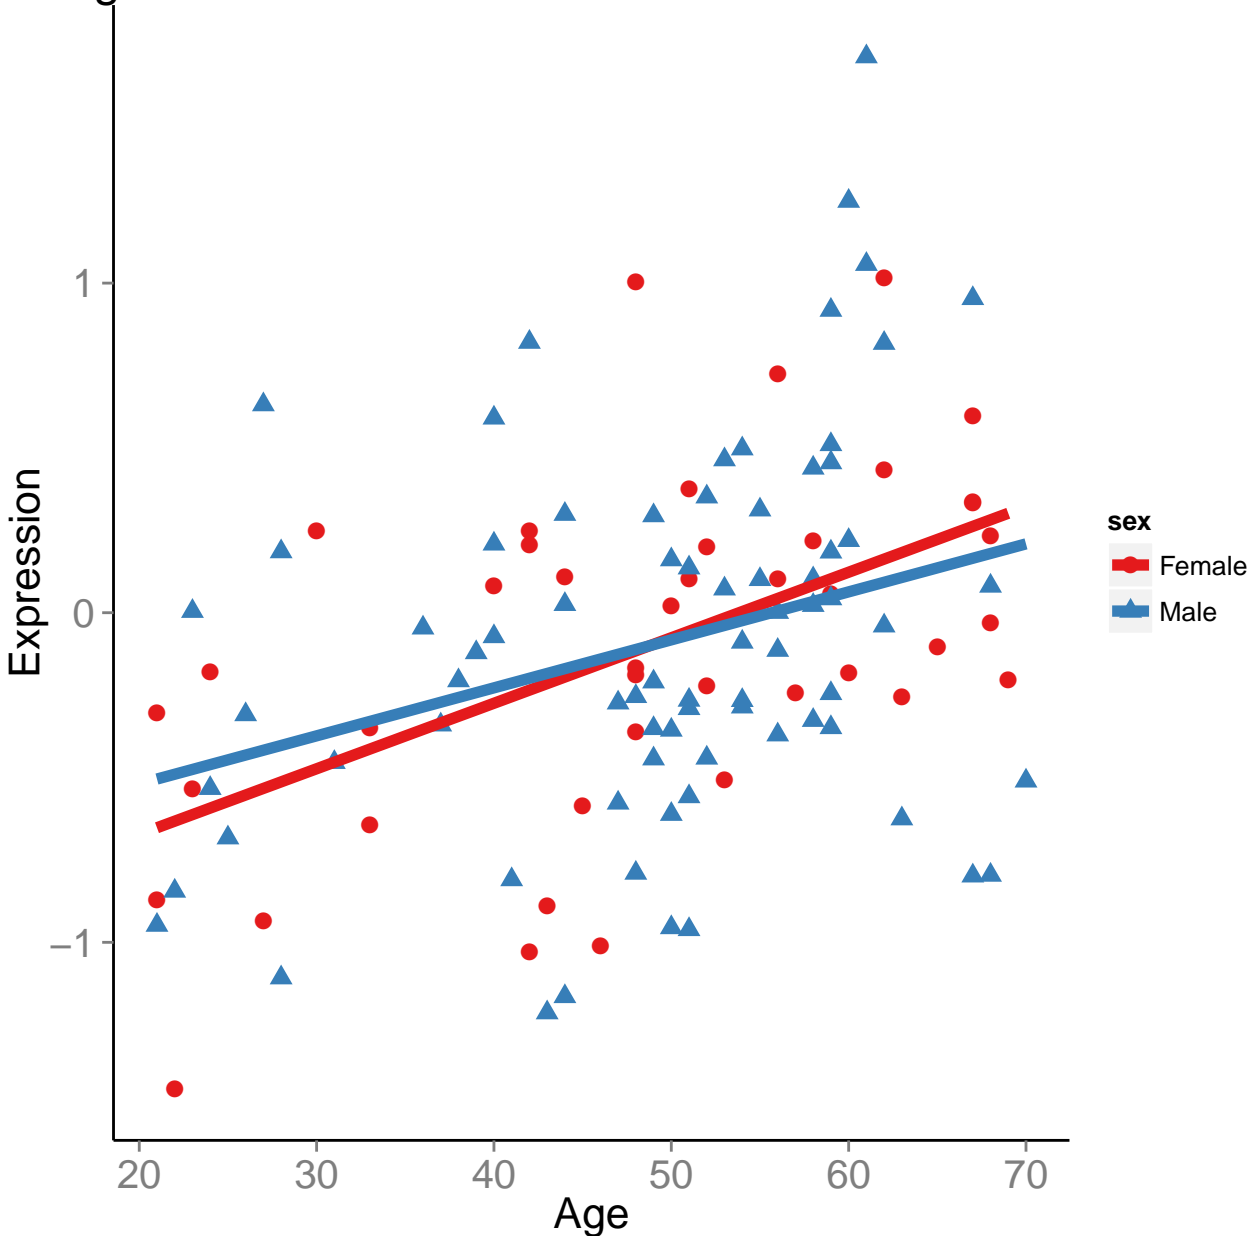



Lung: RBM47 Pearson-R=-0.39 Pval=1.30E-05

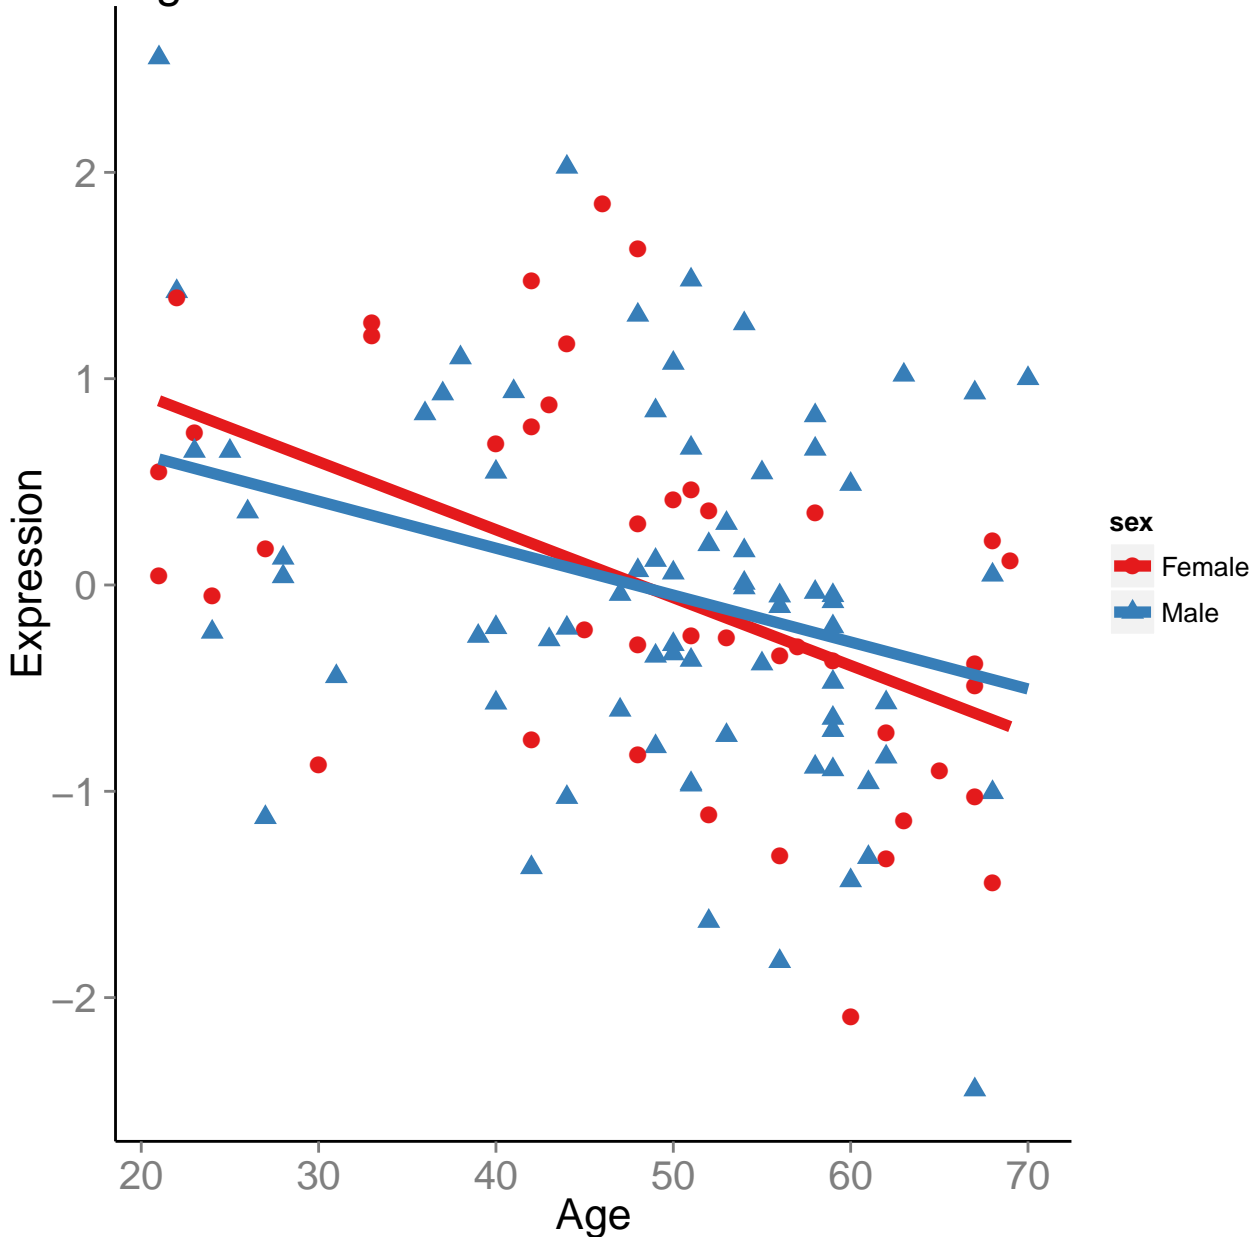

Lung: ATP11A Pearson-R=-0.39 Pval=1.30E-05

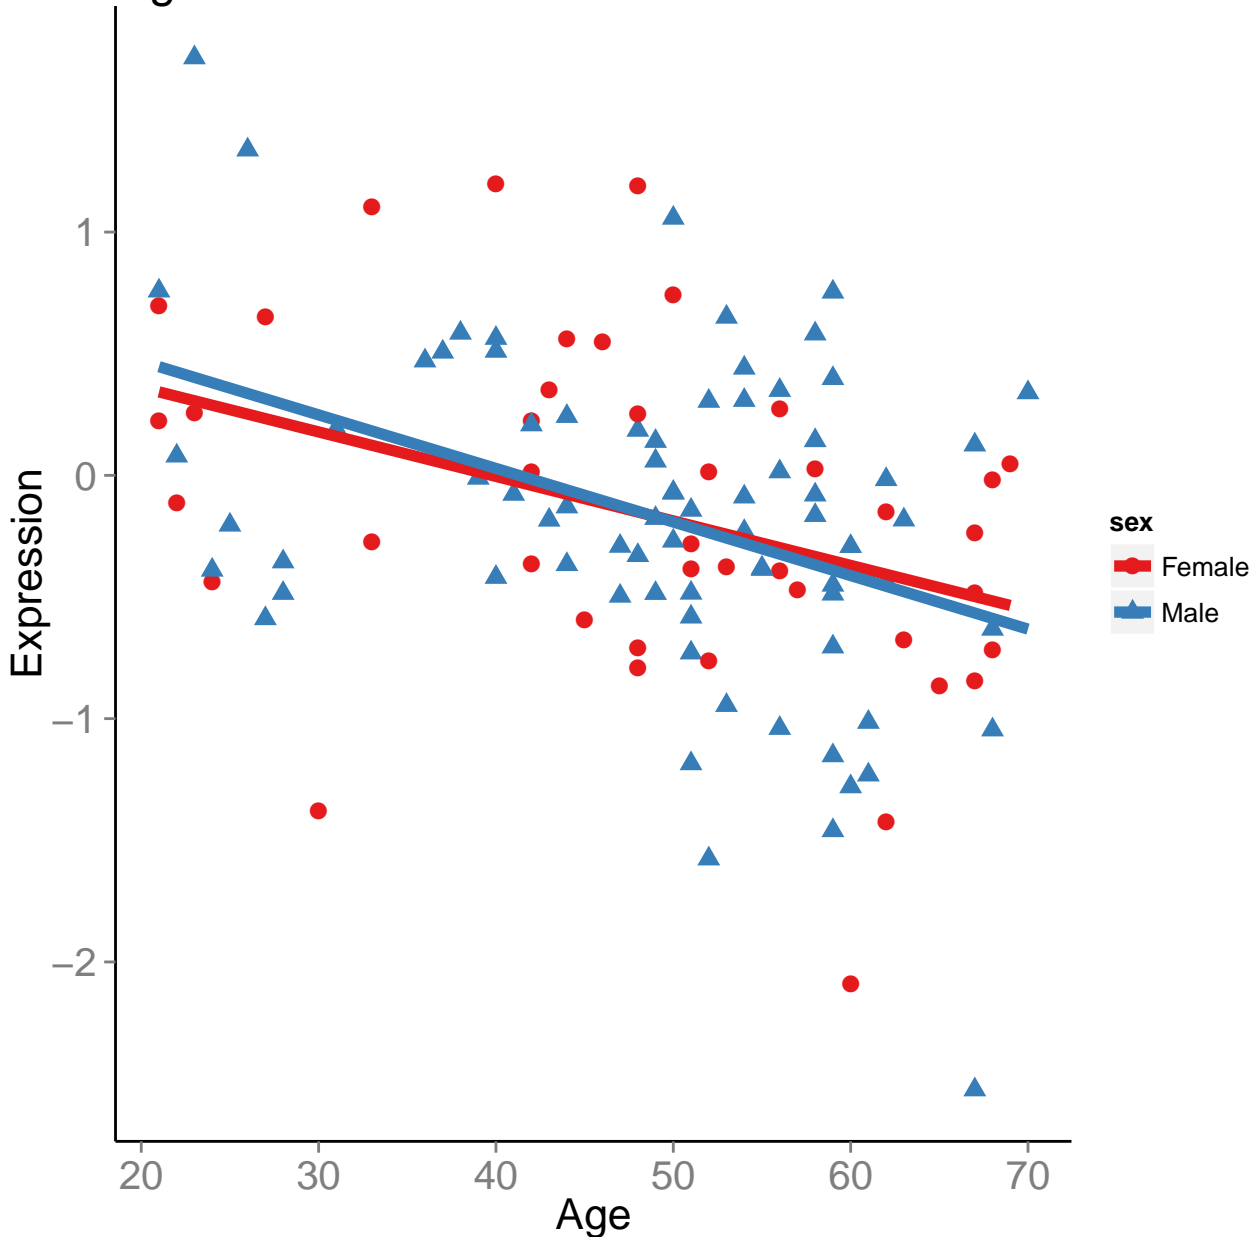

Lung: LAMP3 Pearson-R=-0.39 Pval=1.26E-05

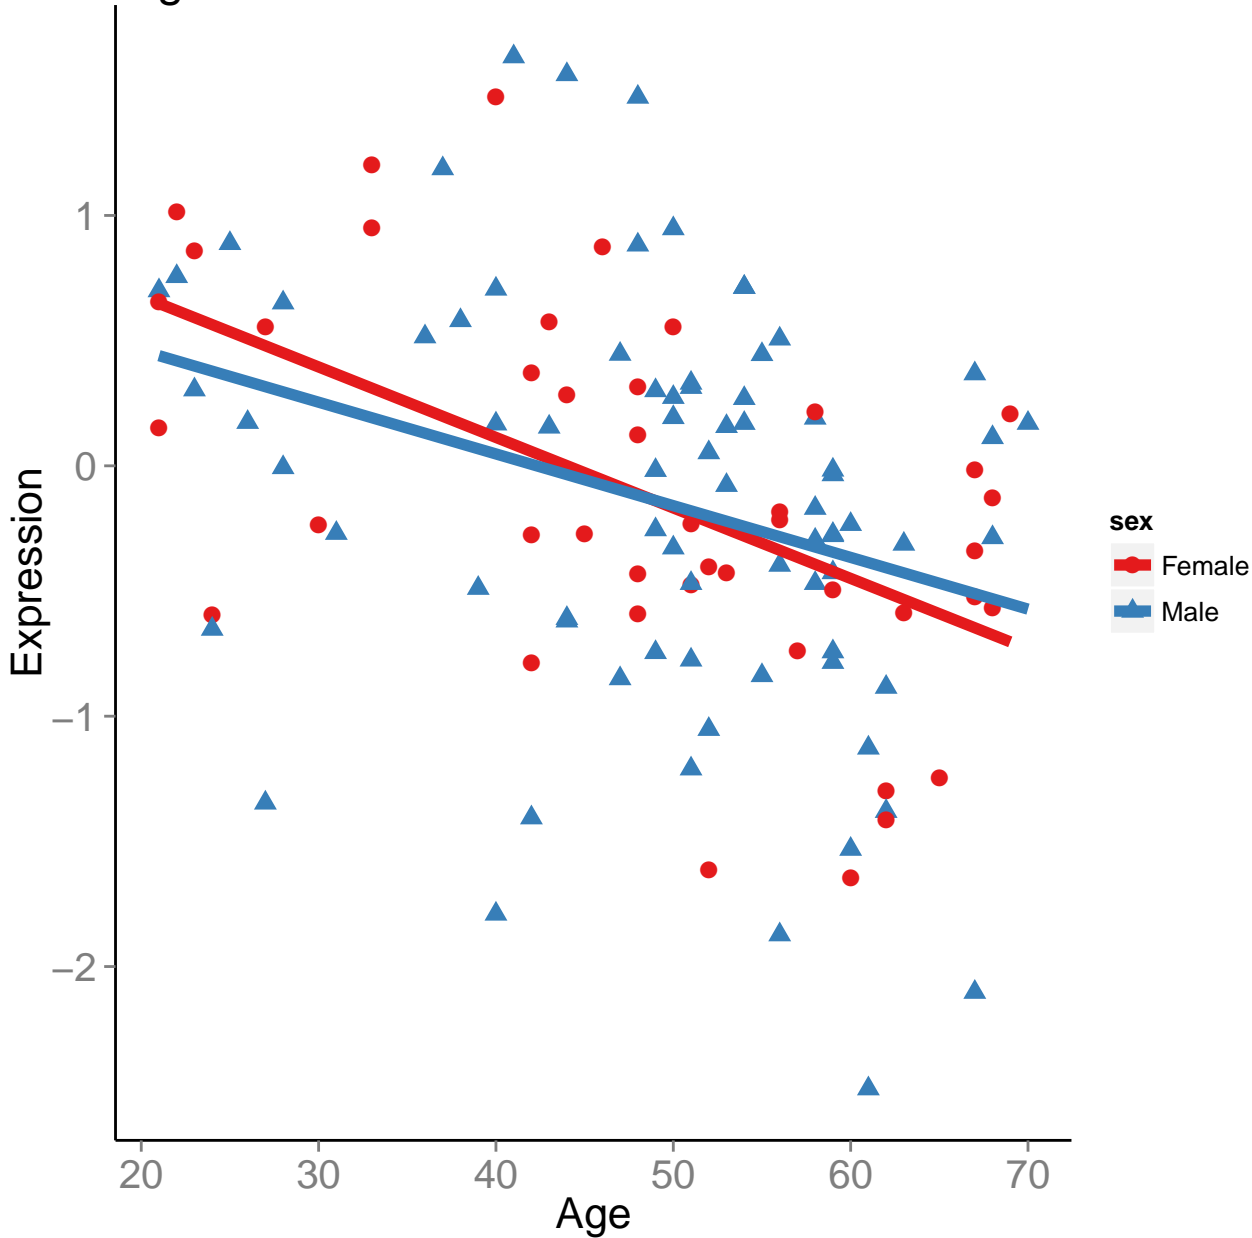

Lung: ARHGEF38 Pearson-R=-0.39 Pval=1.31E-05

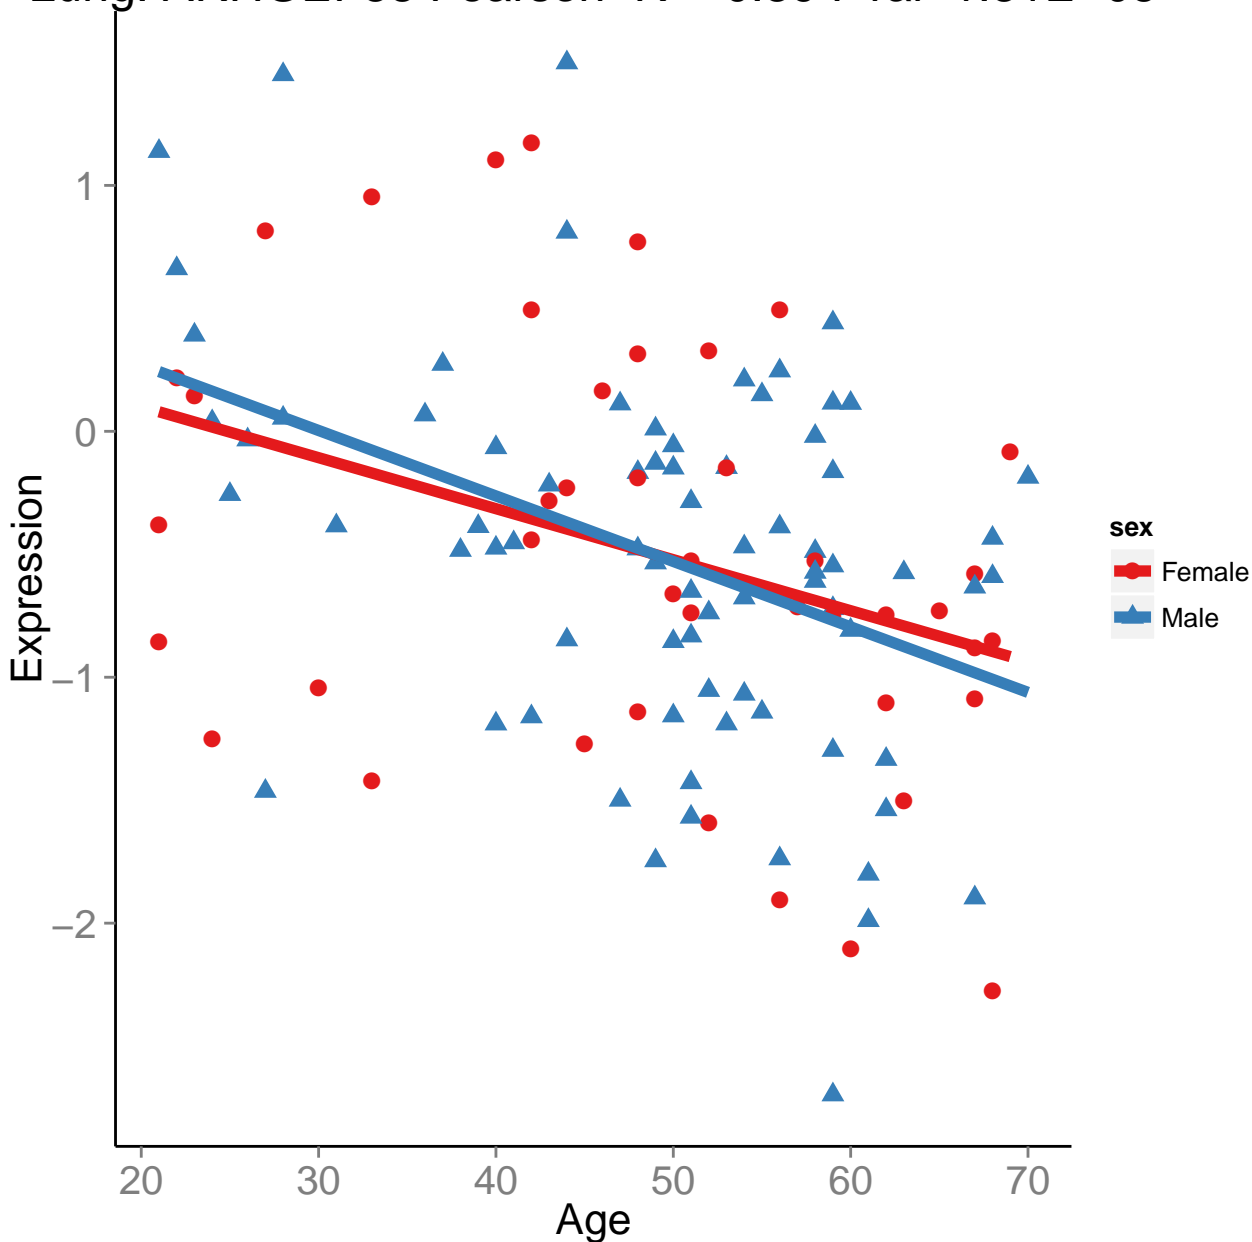

Lung: ALAS1 Pearson-R=-0.39 Pval=1.26E-05

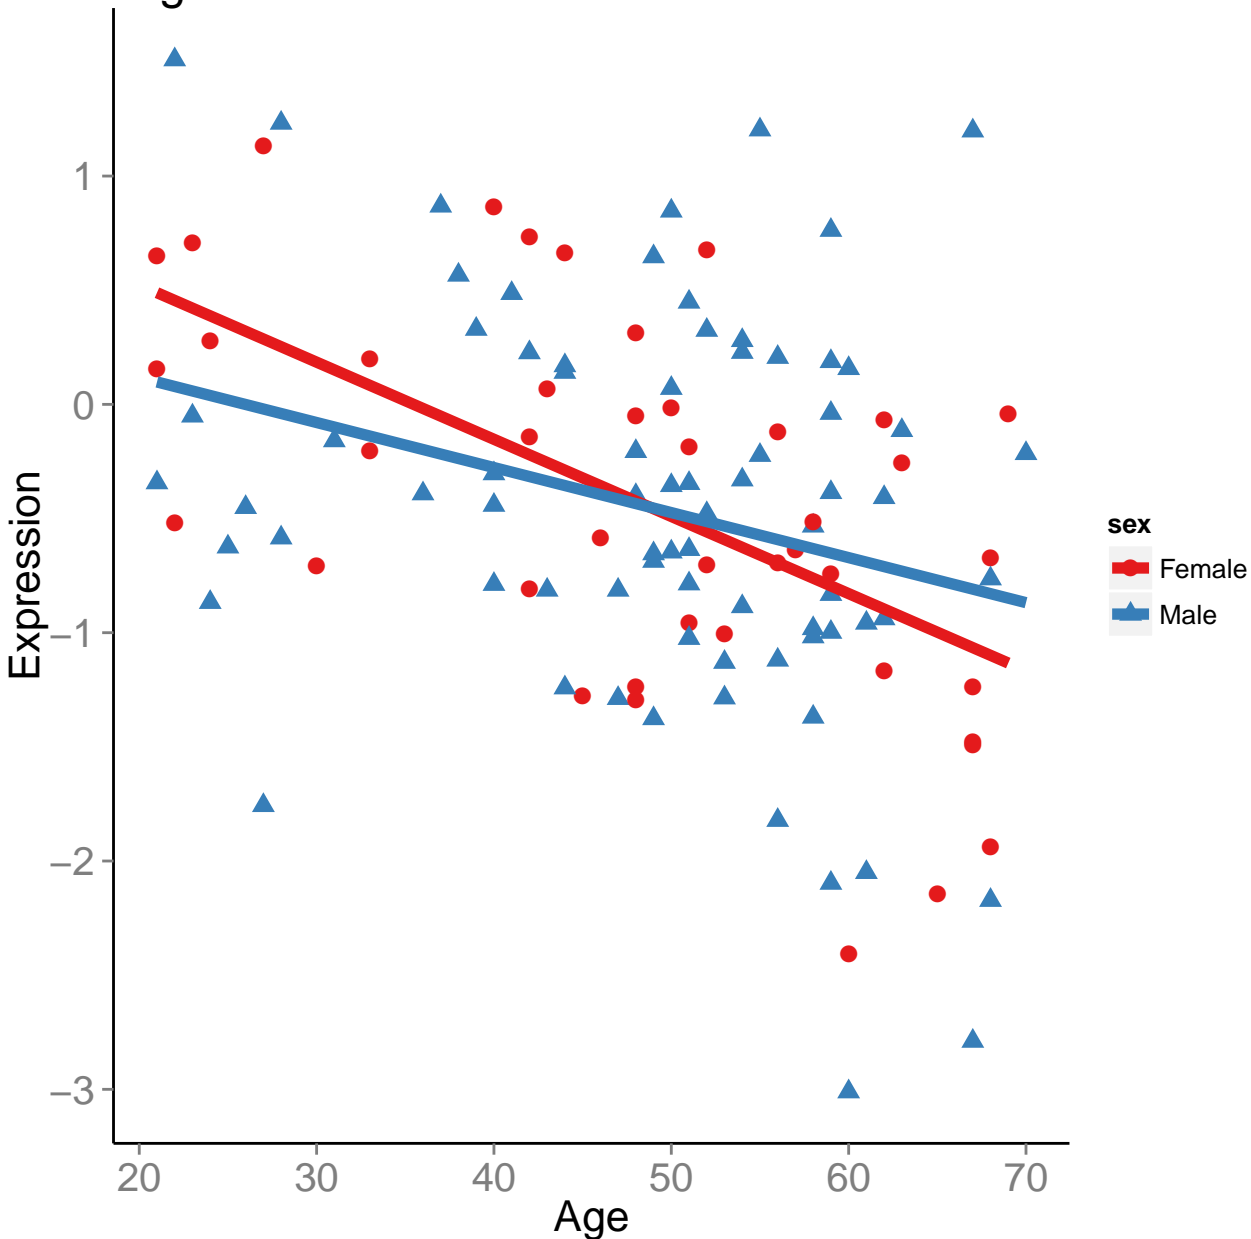

Lung: C1orf130 Pearson-R=-0.39 Pval=1.33E-05

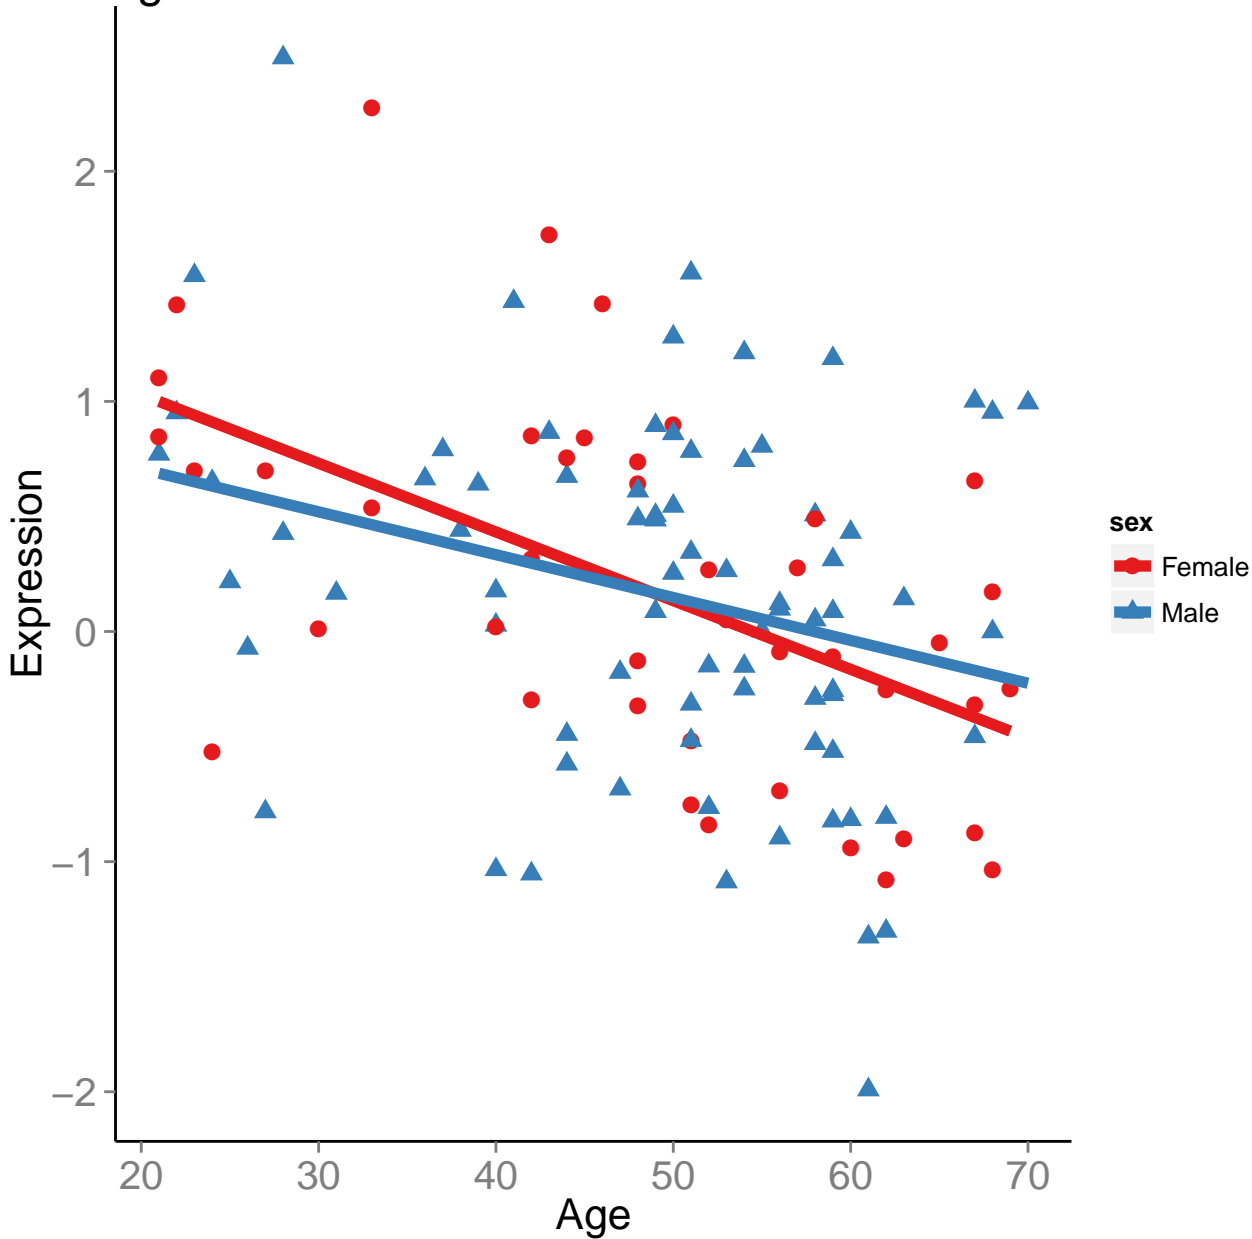

Lung: WDR18 Pearson-R=-0.39 Pval=1.35E-05

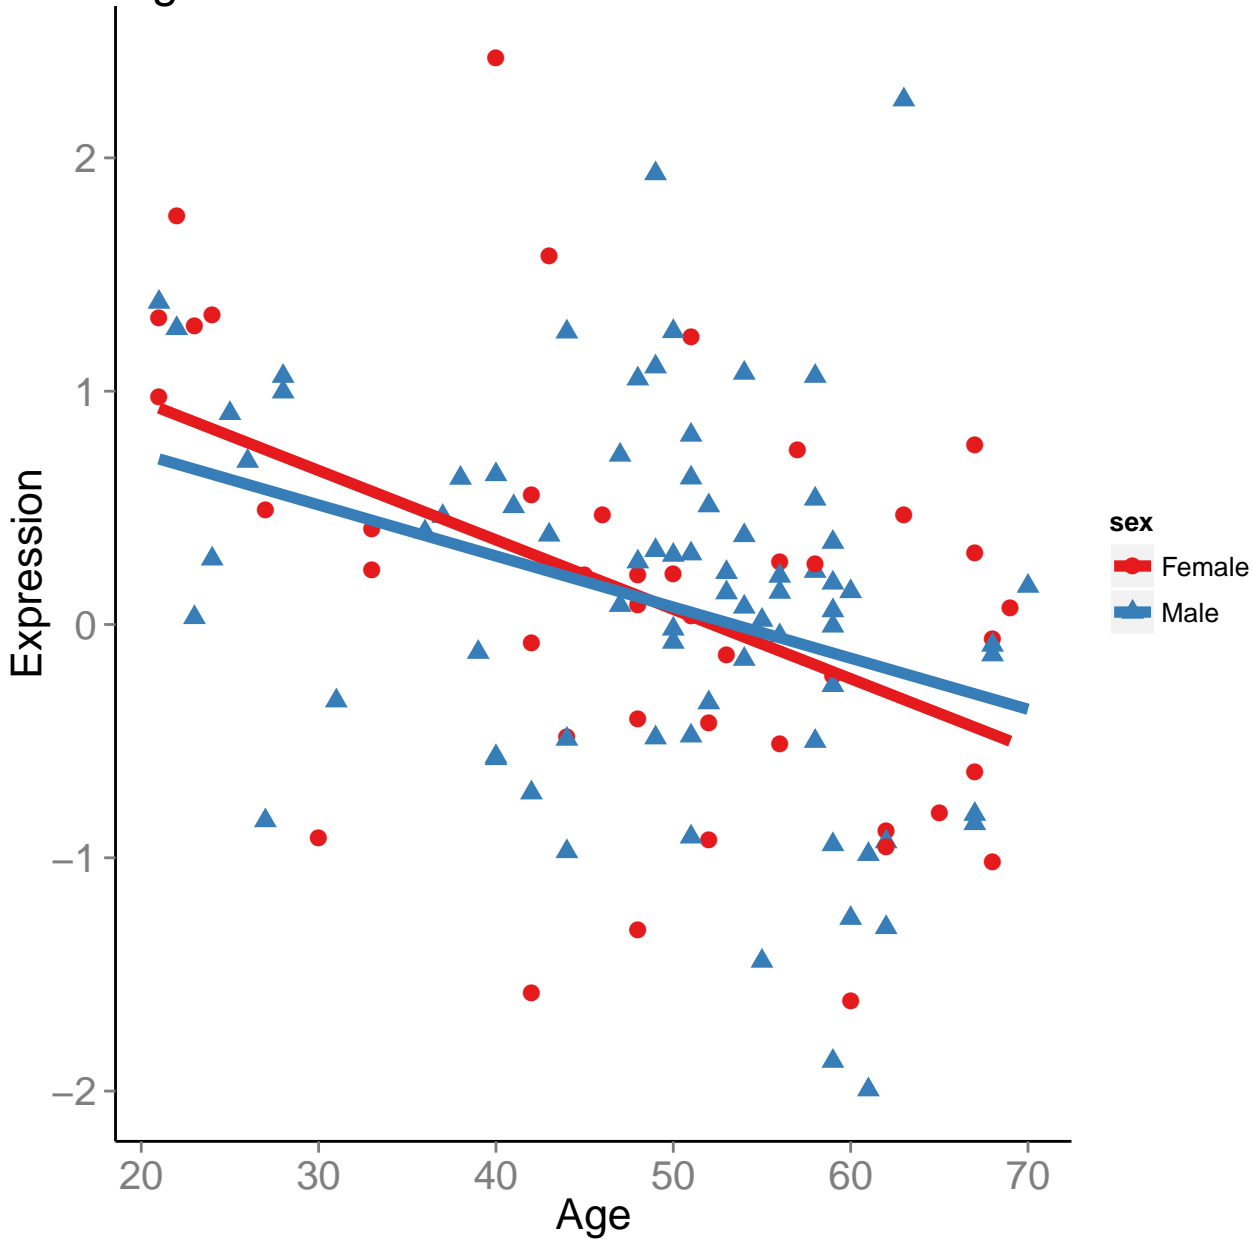

Lung: RECK Pearson-R=0.39 Pval=1.48E-05

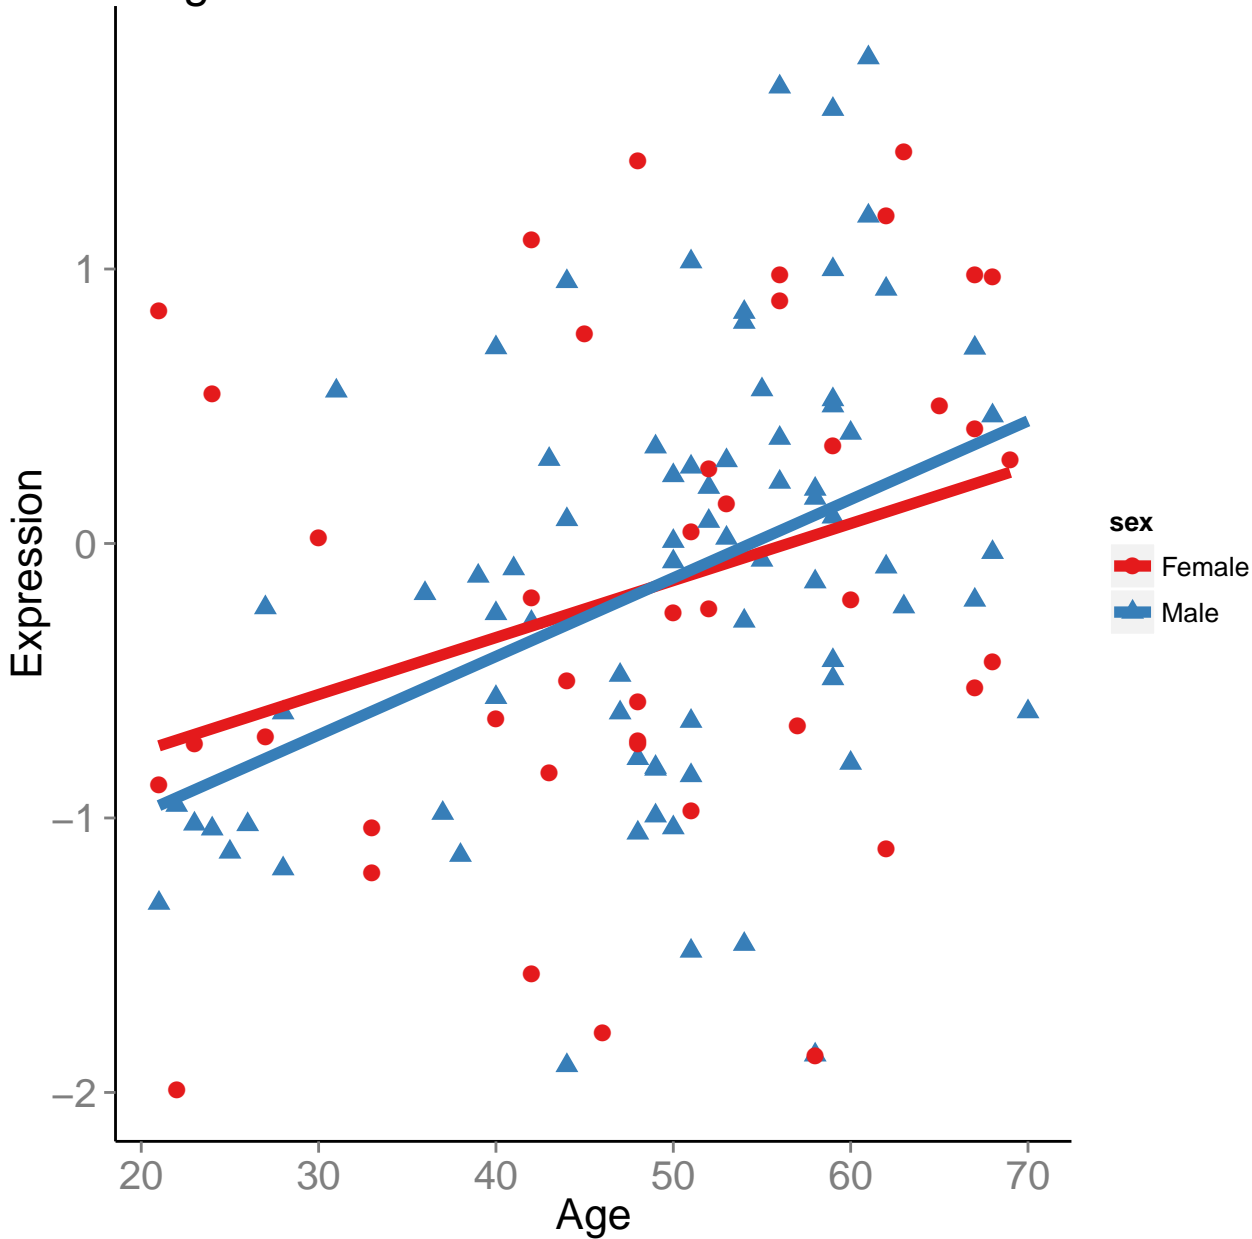



Lung: SLC46A2 Pearson-R=-0.39 Pval=1.47E-05

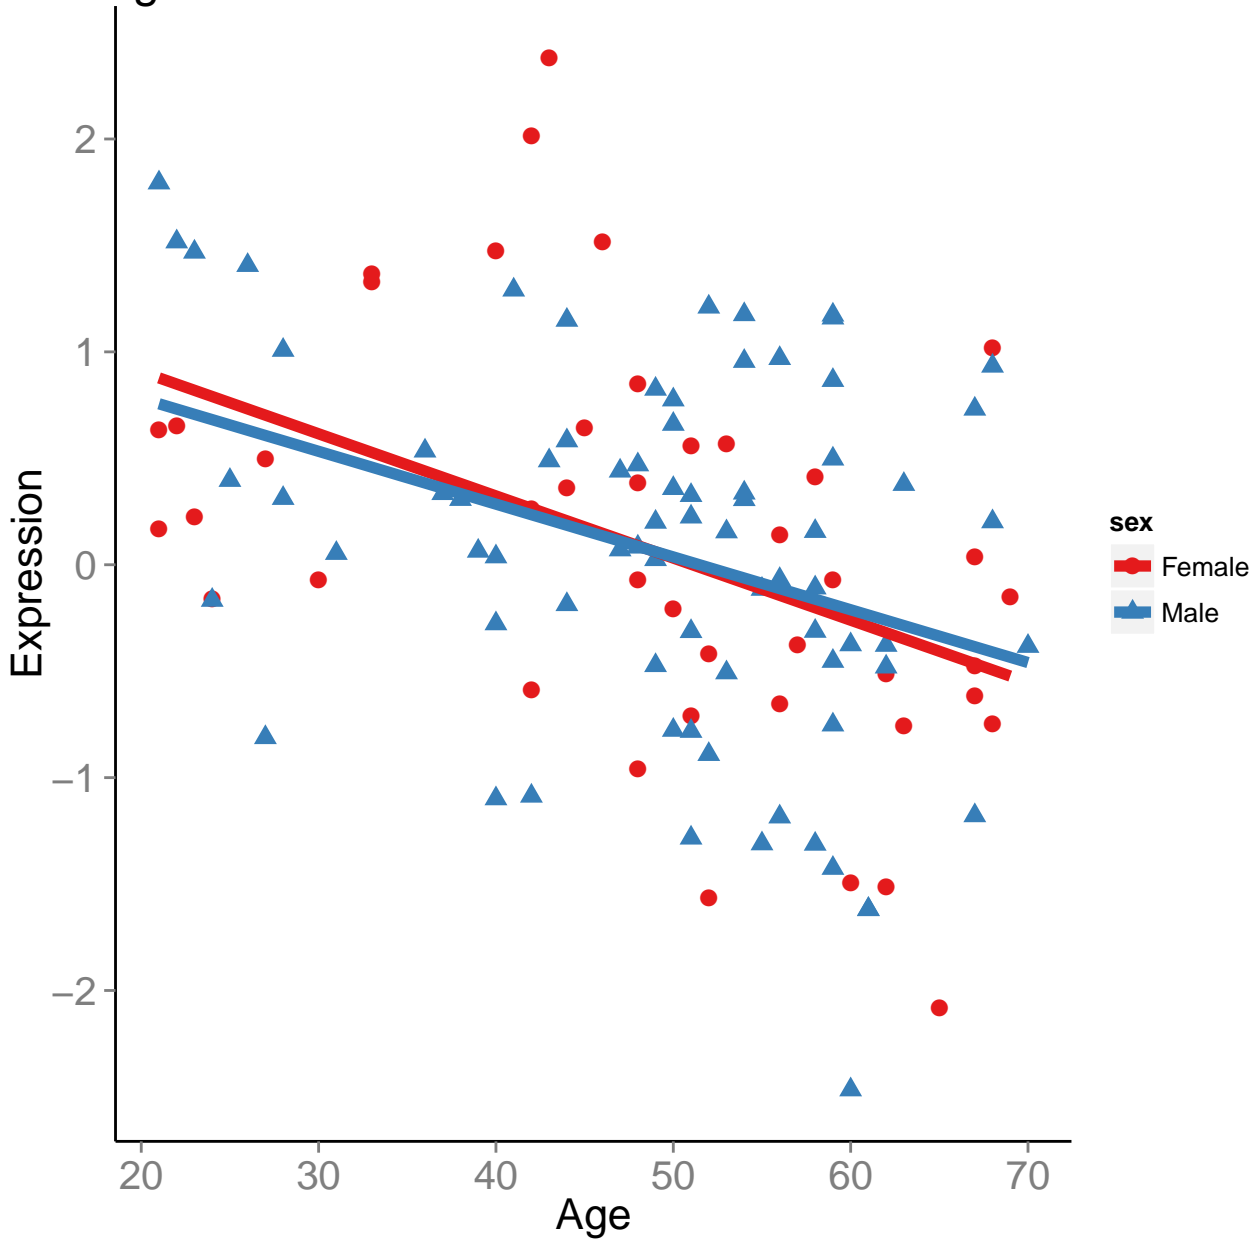

Lung: PPP3CC Pearson-R=0.39 Pval=1.48E-05

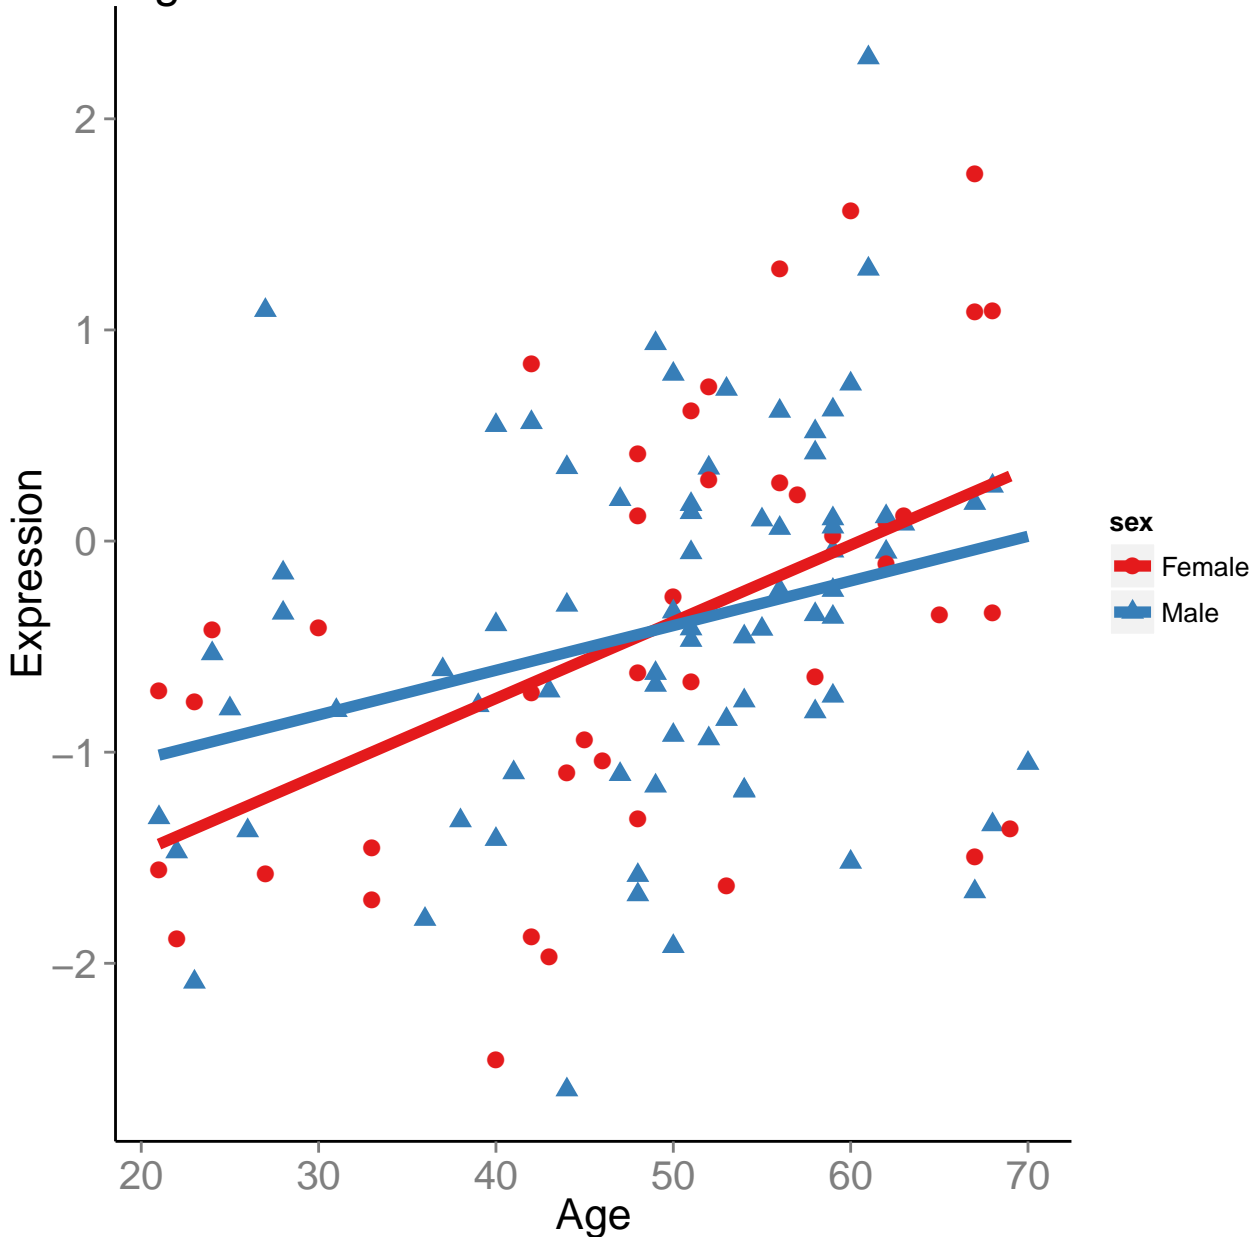

Lung: RAB8B Pearson-R=0.39 Pval=1.44E-05

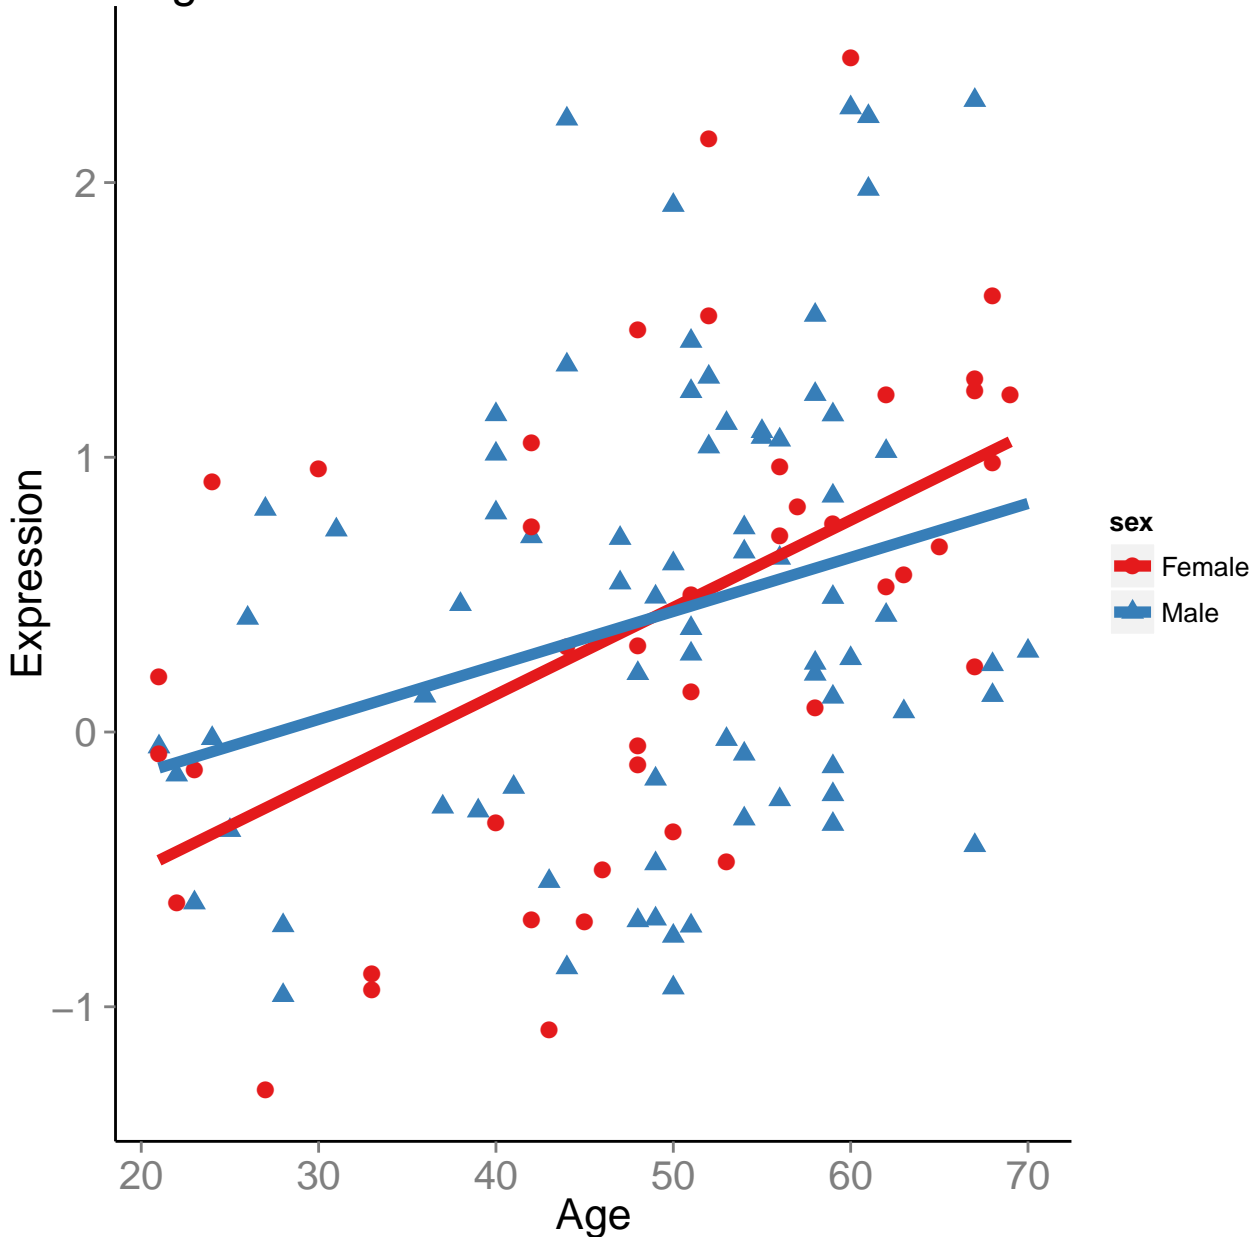

Lung: MOCS1 Pearson-R=0.38 Pval=1.54E-05

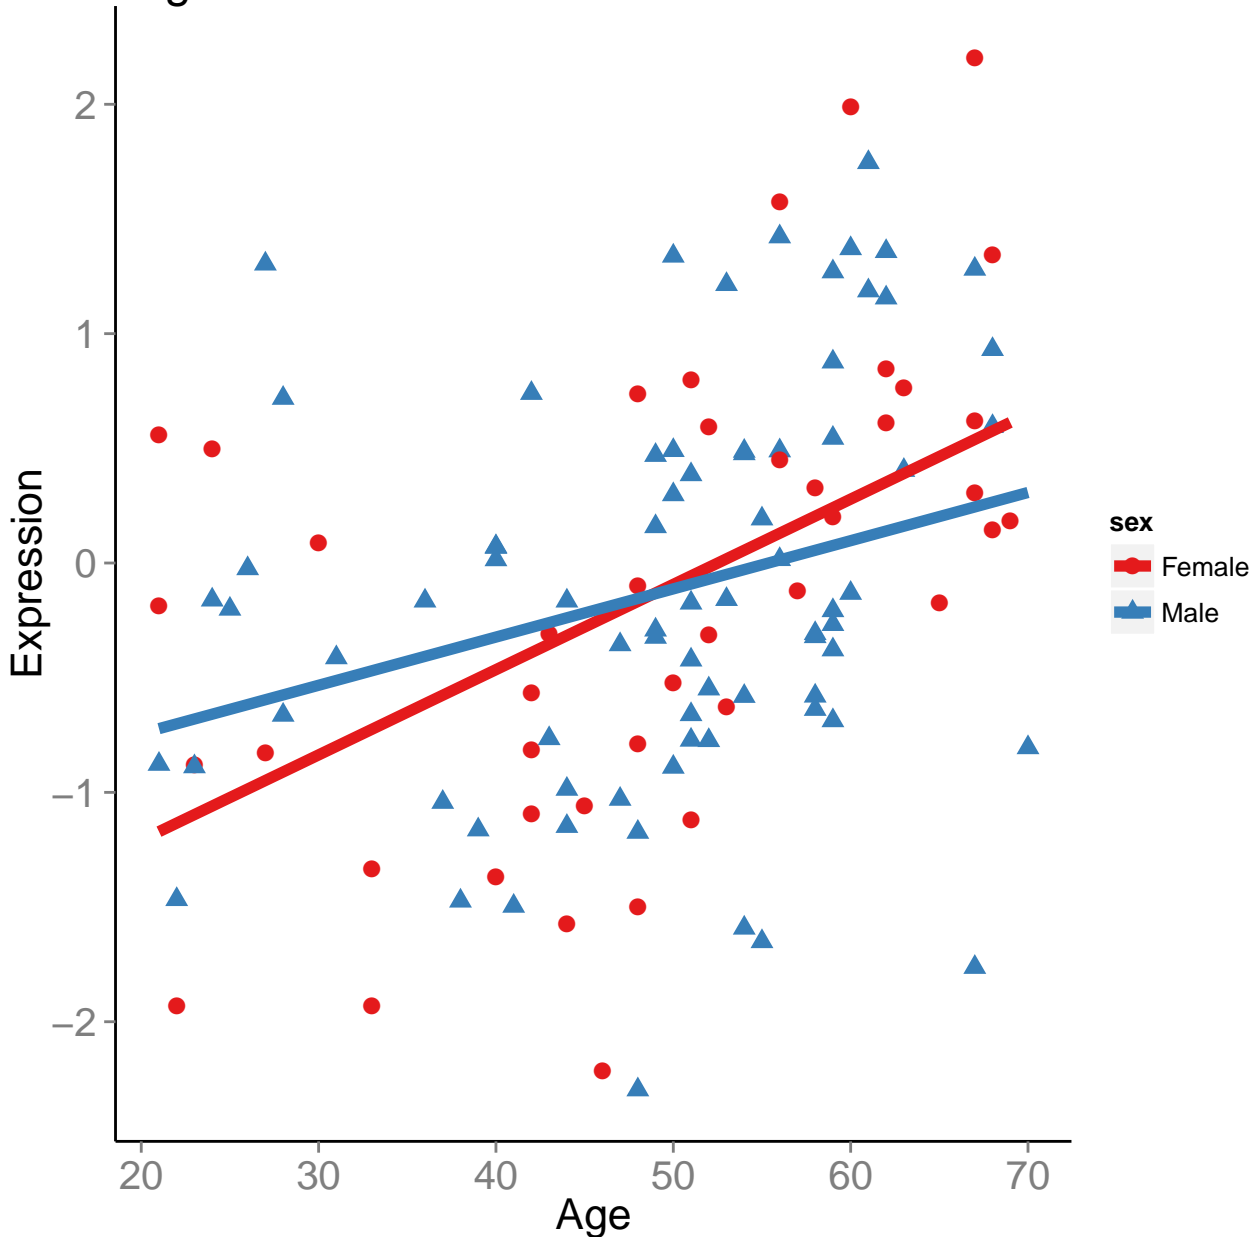

Lung: CAMKK1 Pearson-R=-0.38 Pval=1.60E-05

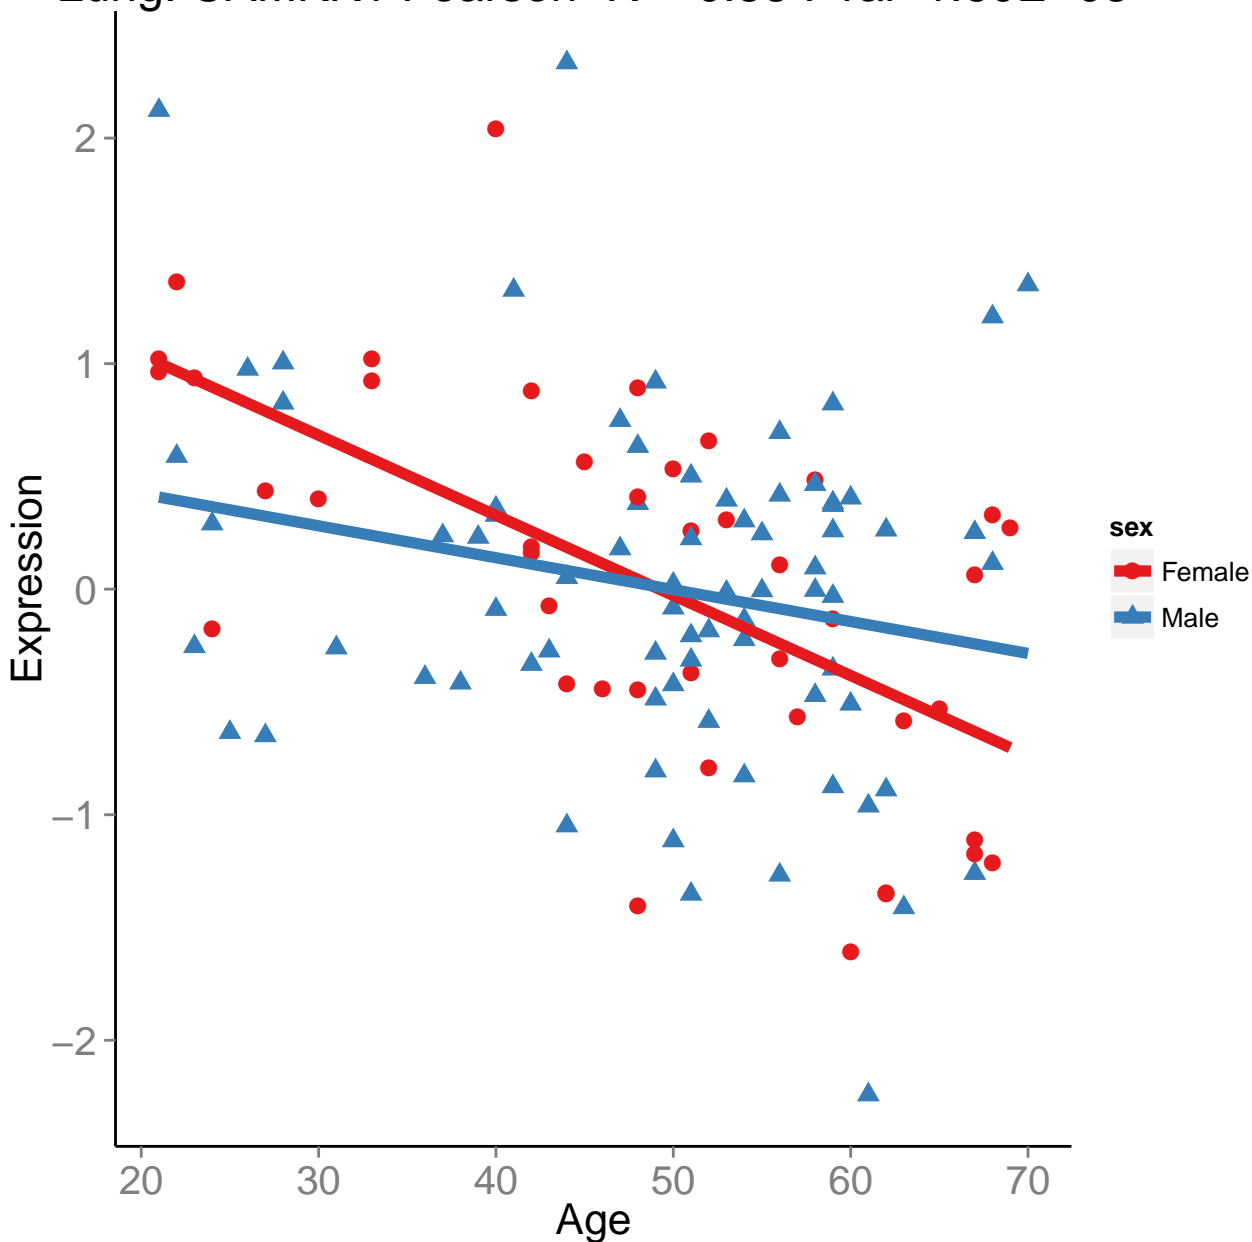

Lung: DPT Pearson-R=0.38 Pval=1.61E-05

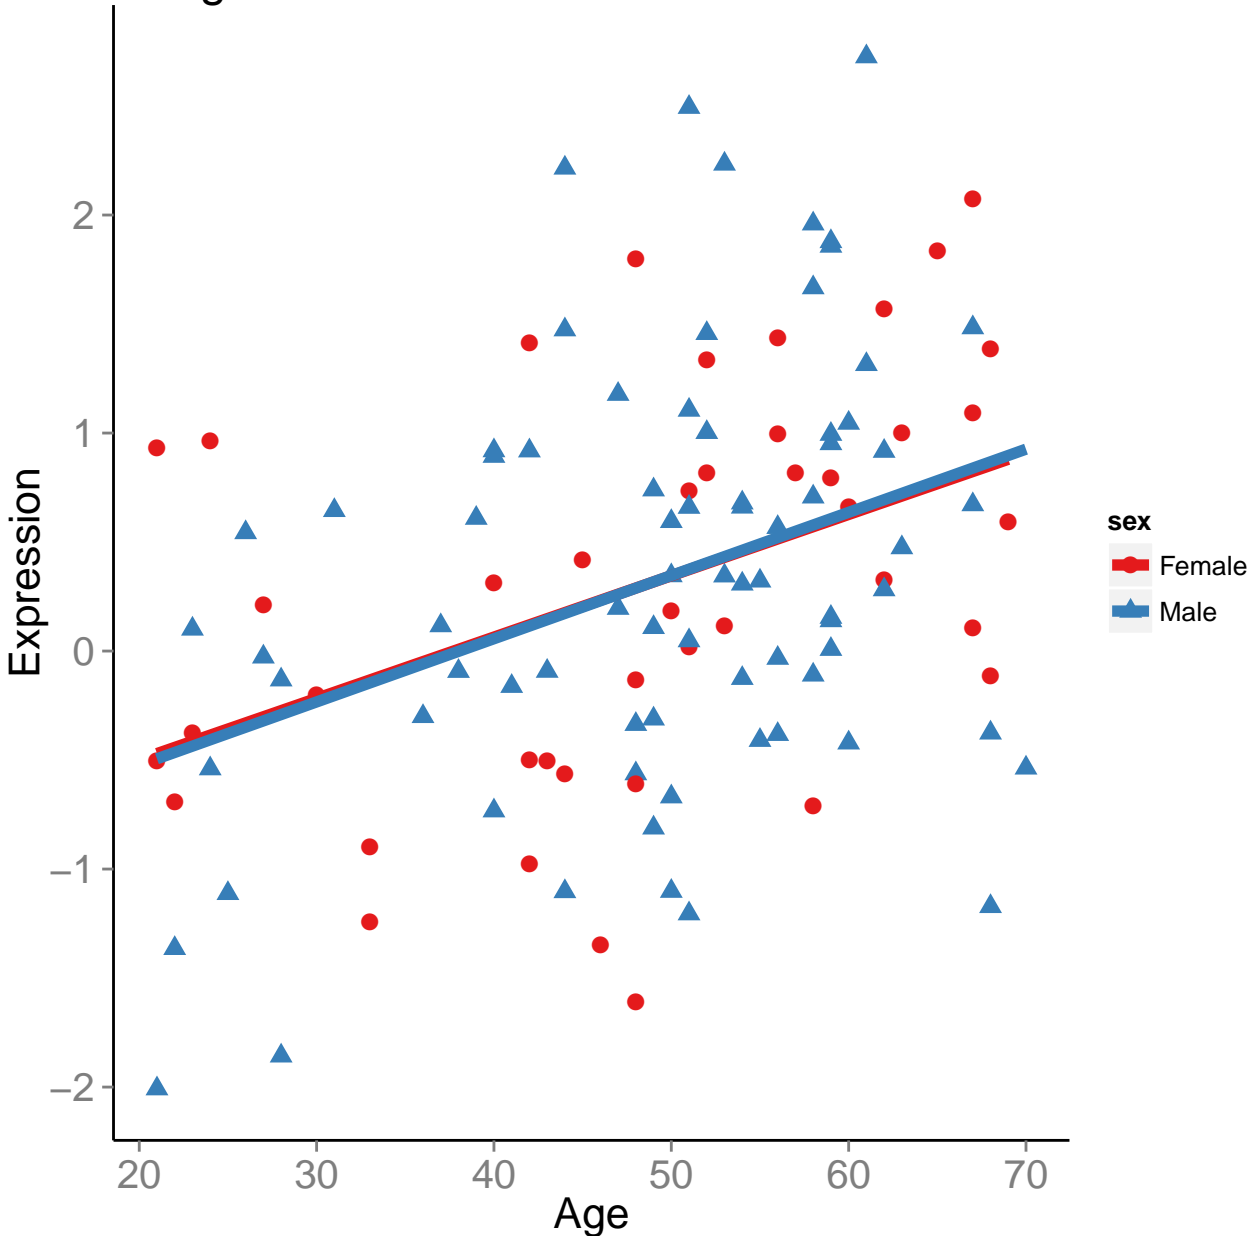

Lung: LTA4H Pearson-R=-0.38 Pval=1.59E-05

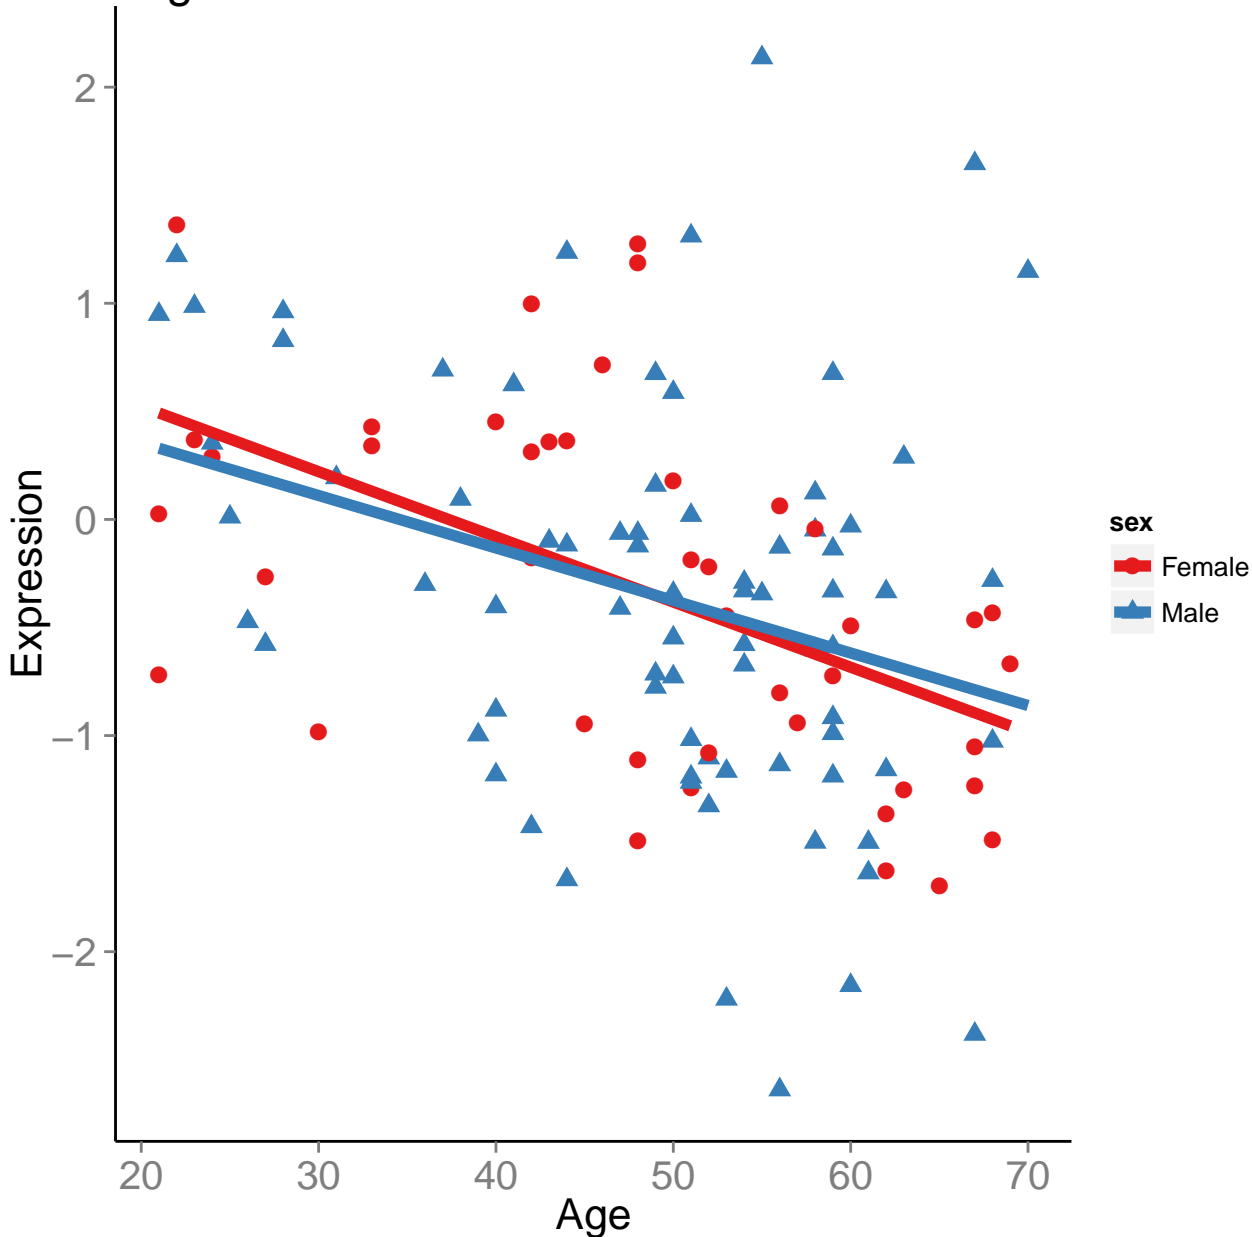

Lung: KLF9 Pearson-R=0.38 Pval=1.80E-05

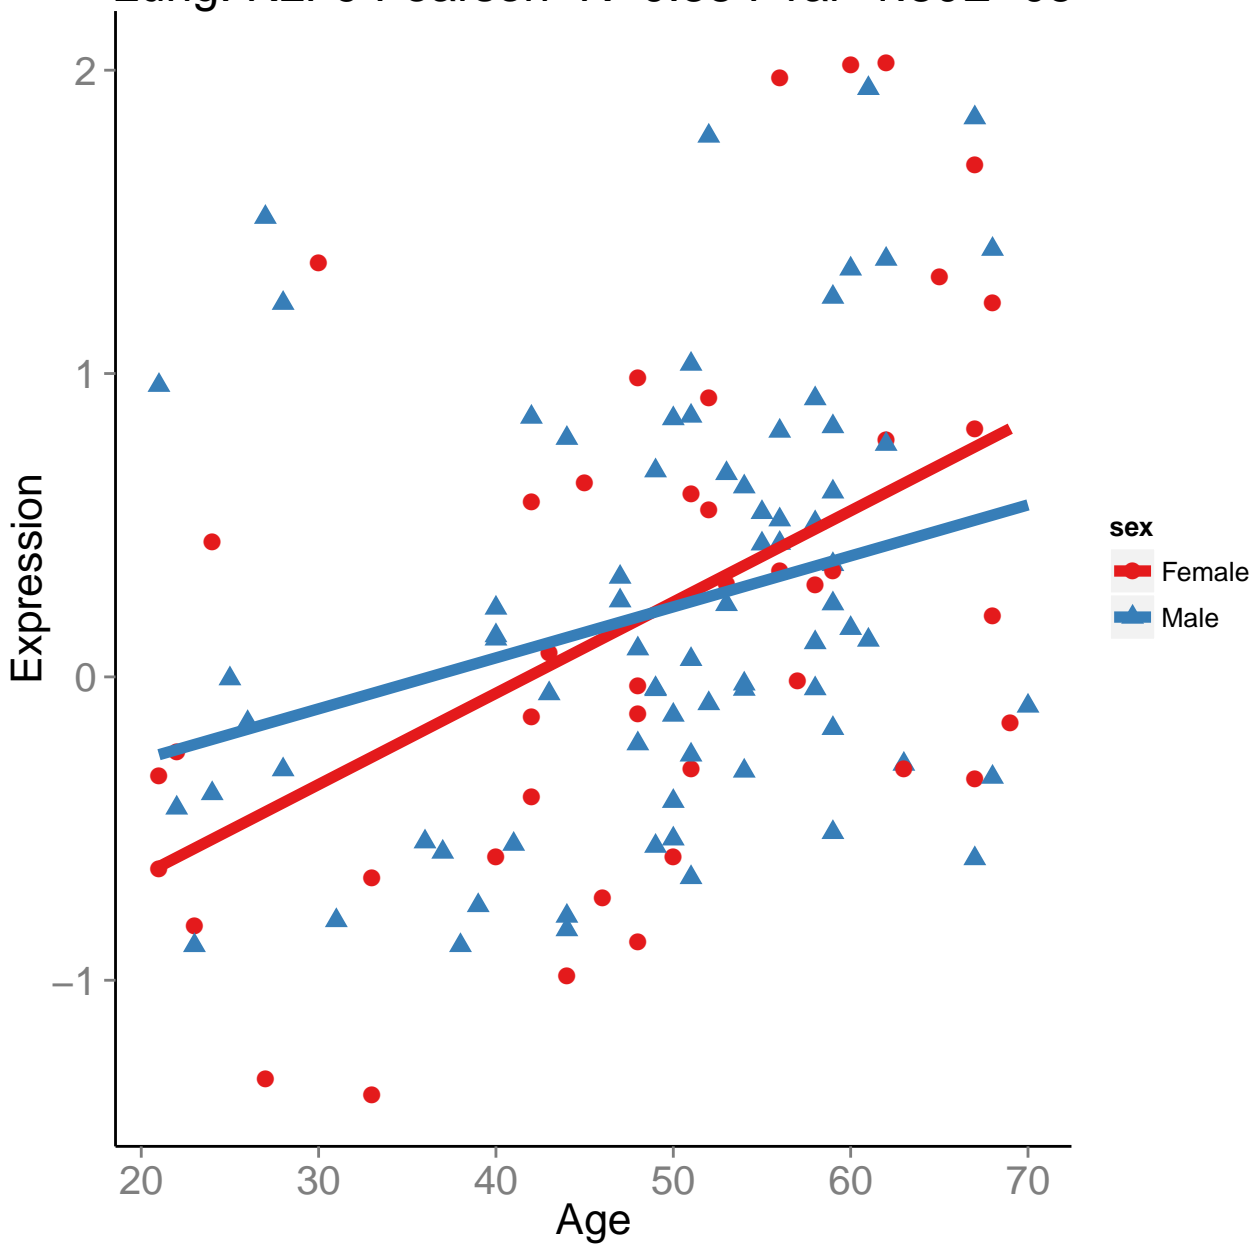



Lung: MAP1B Pearson-R=0.38 Pval=1.80E-05

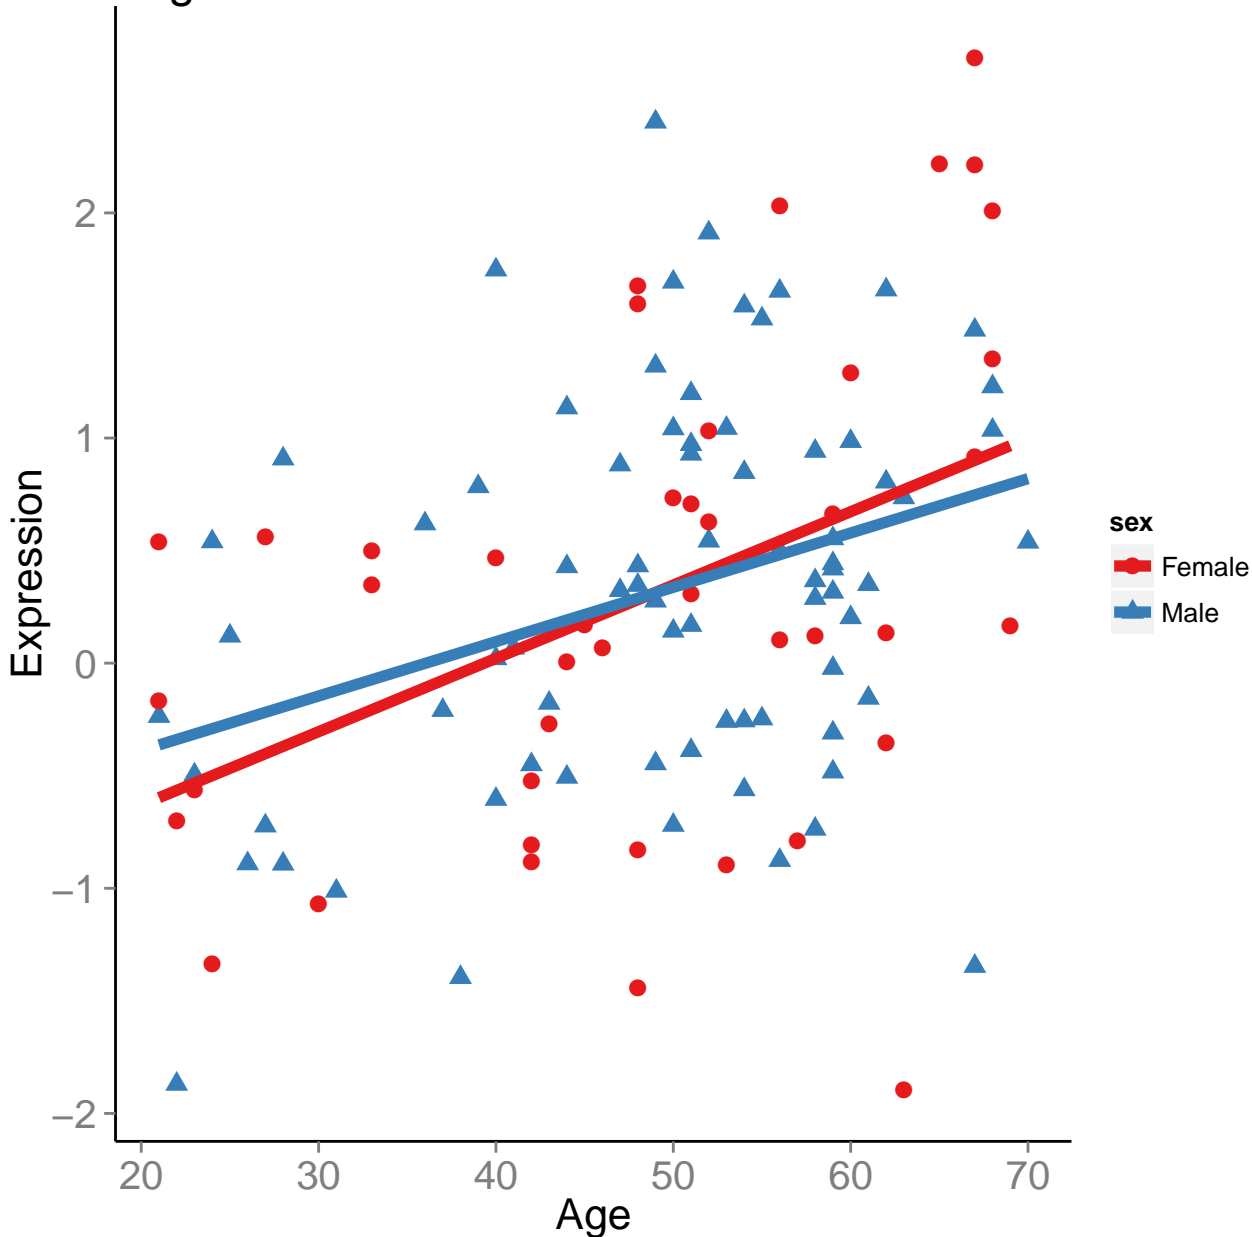

Lung: GYPC Pearson-R=0.38 Pval=1.84E-05

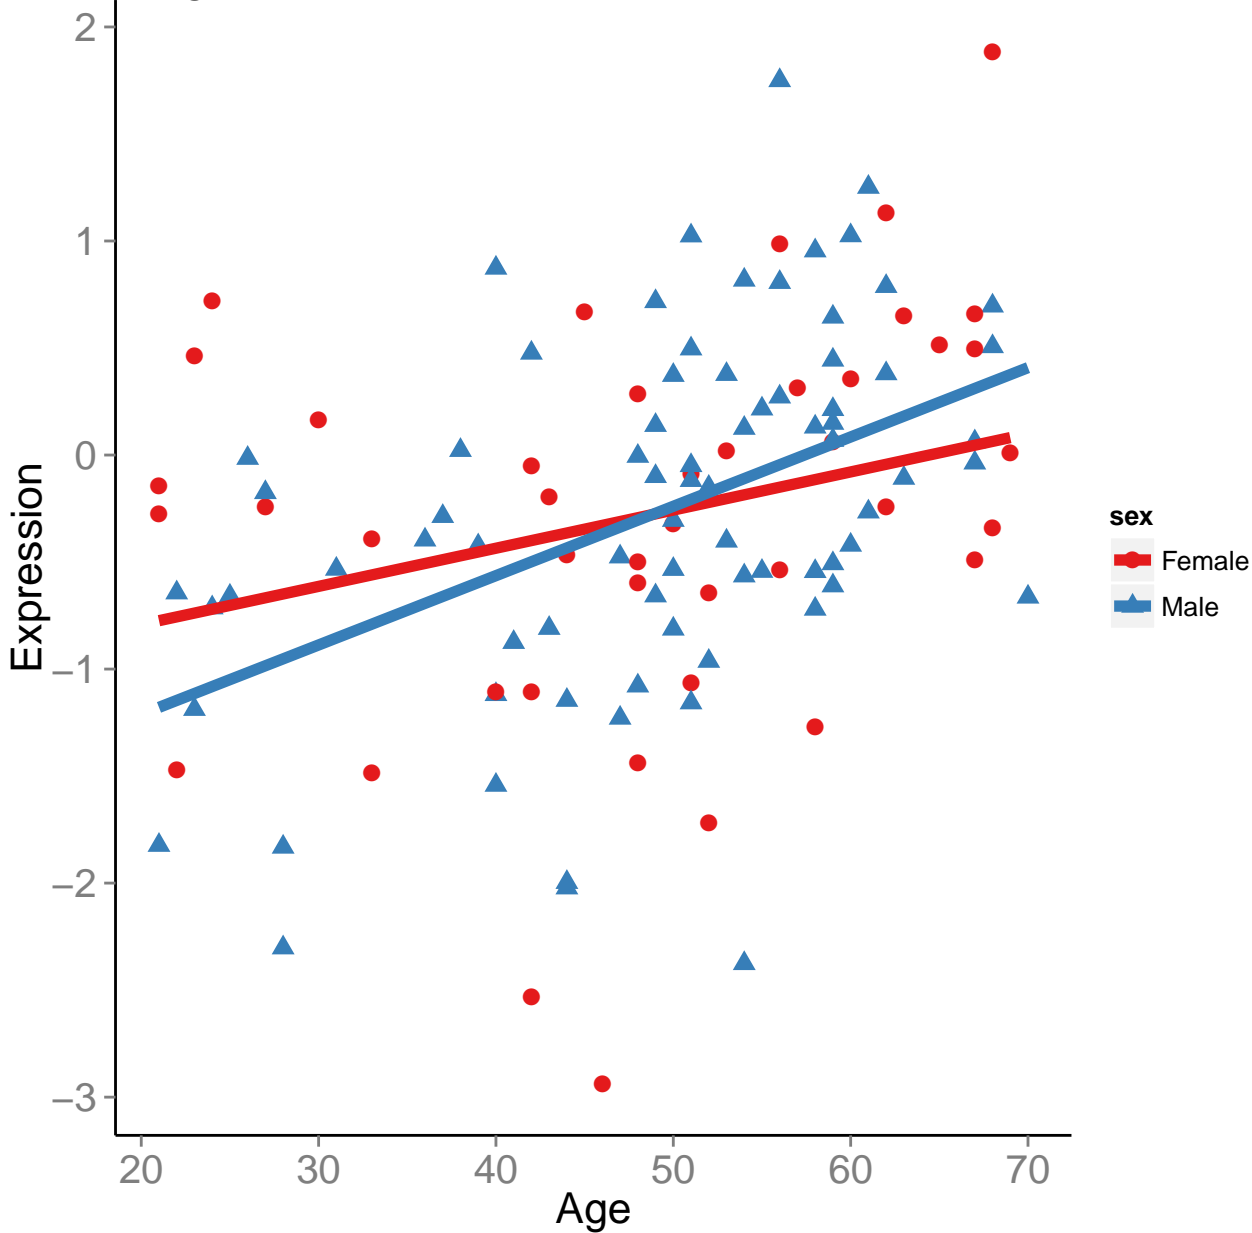

Lung: YEATS4 Pearson-R=-0.38 Pval=2.07E-05

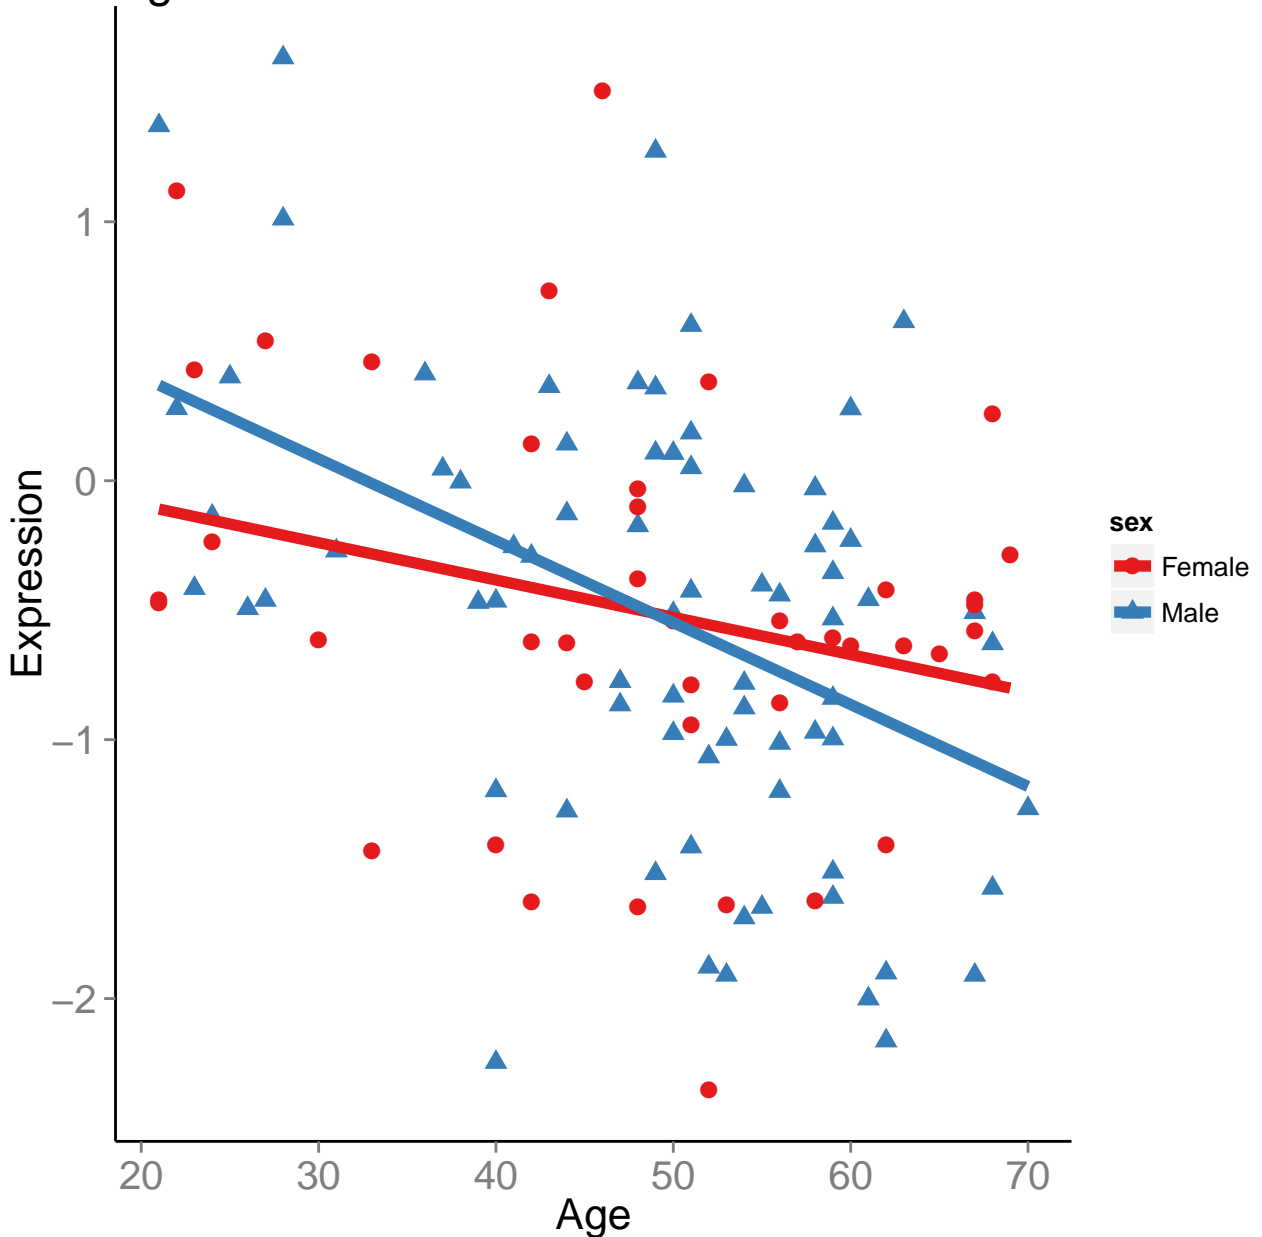

Lung: FEN1 Pearson-R=-0.38 Pval=2.01E-05

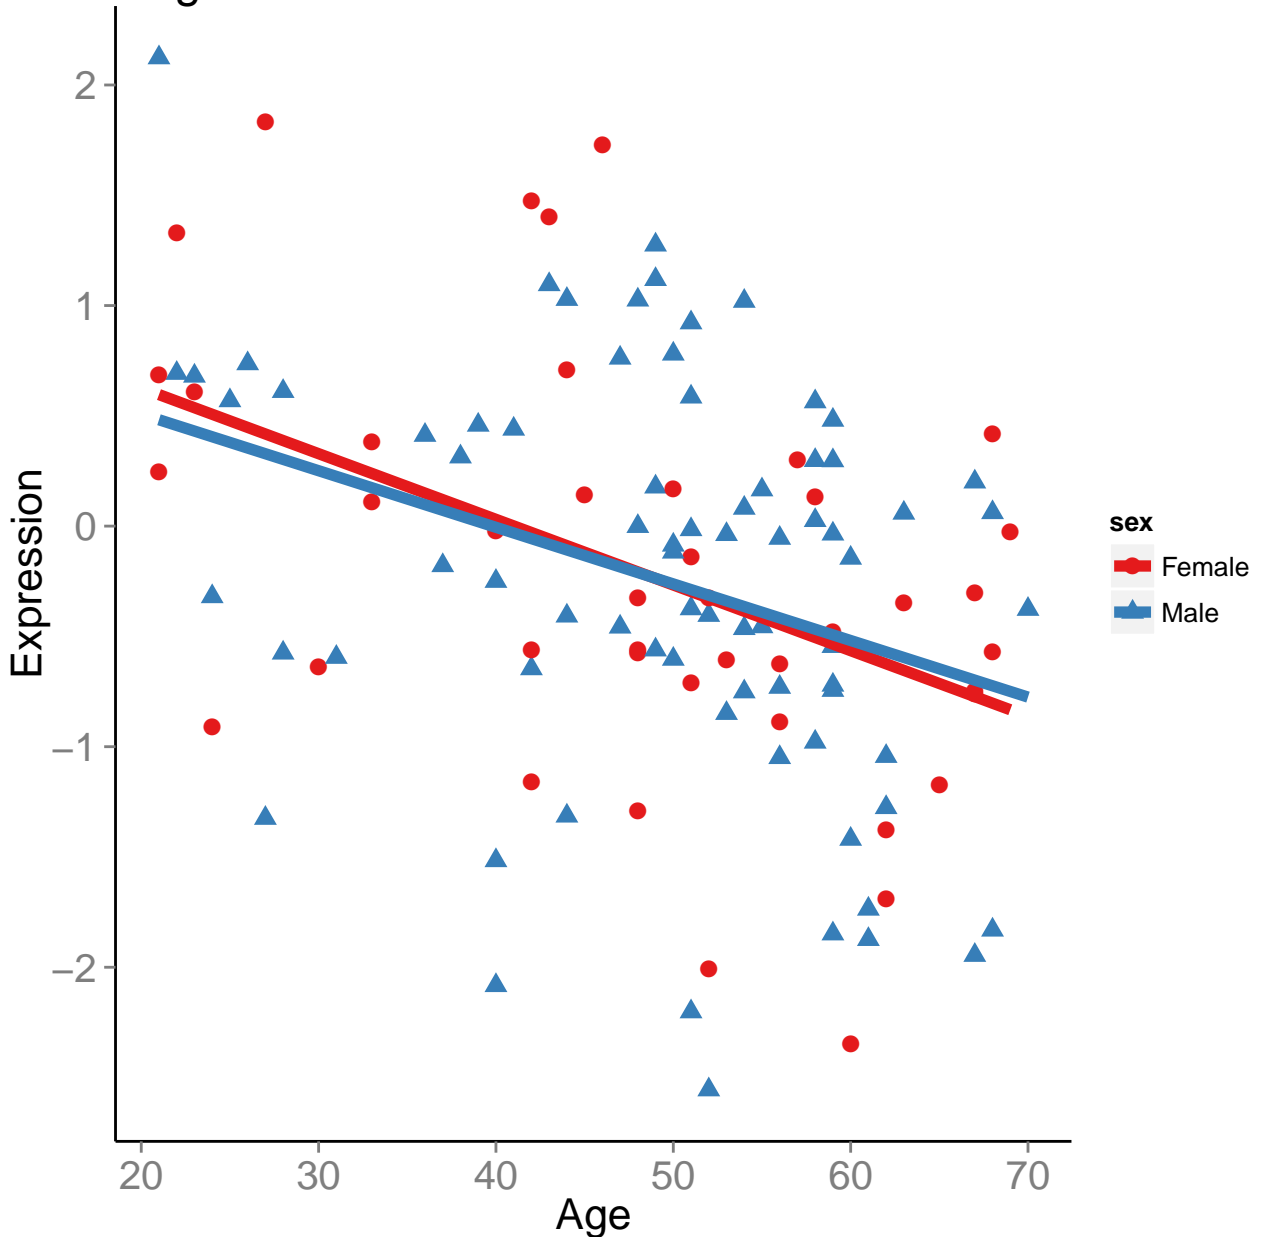

Lung: FBLN5 Pearson-R=0.38 Pval=2.04E-05

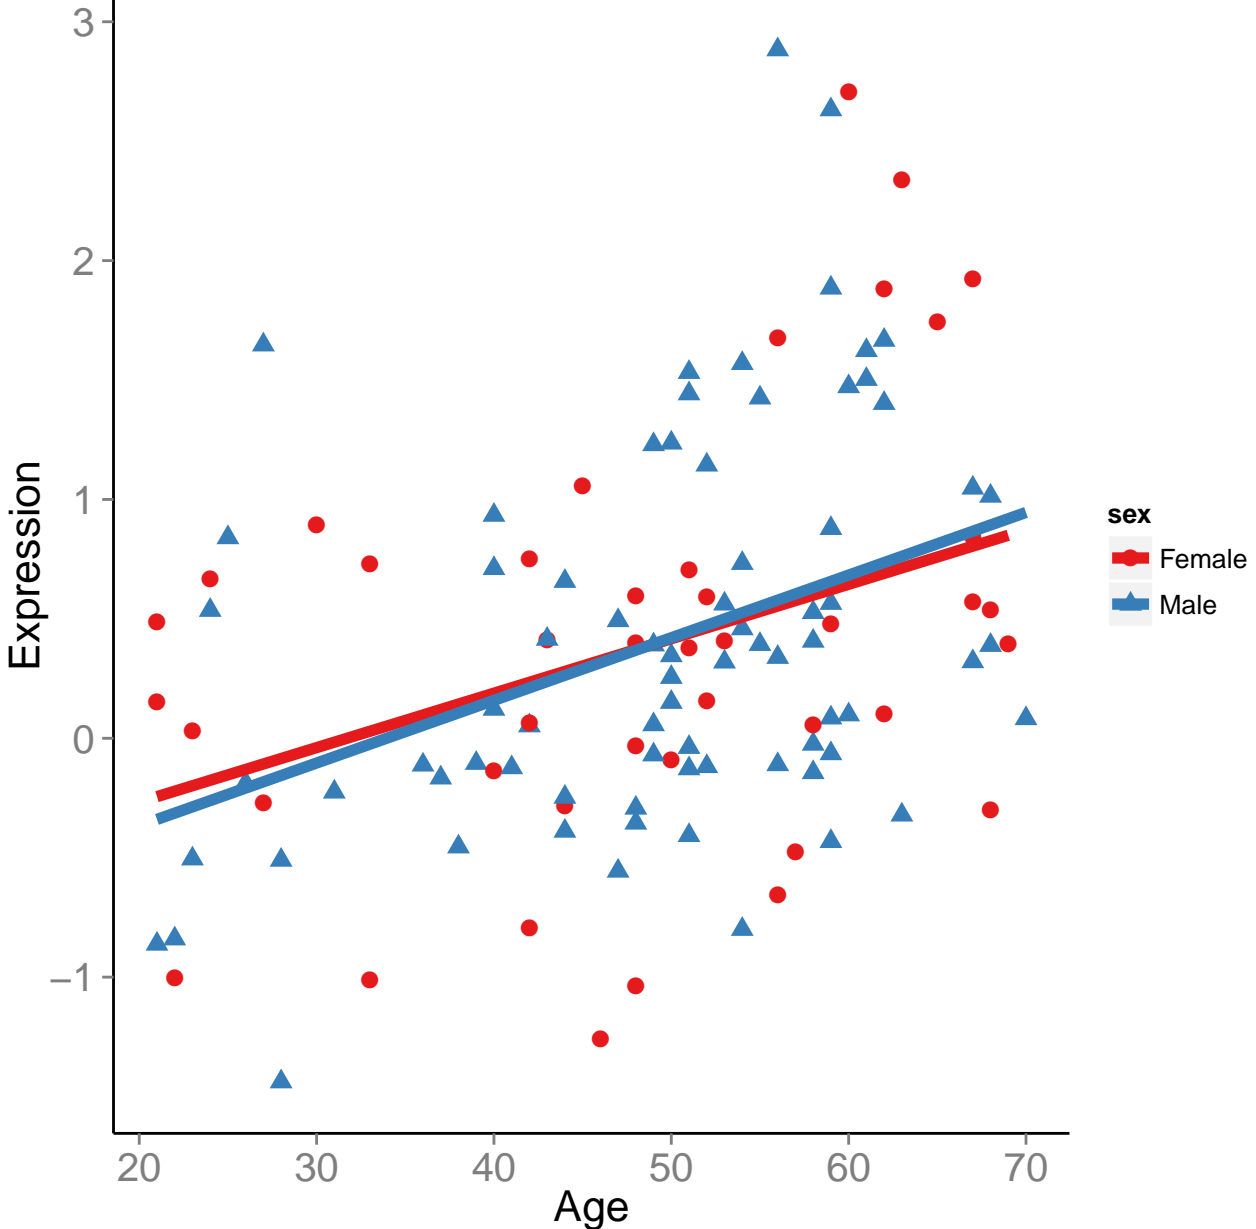

Lung: ACAA2 Pearson-R=-0.38 Pval=2.08E-05

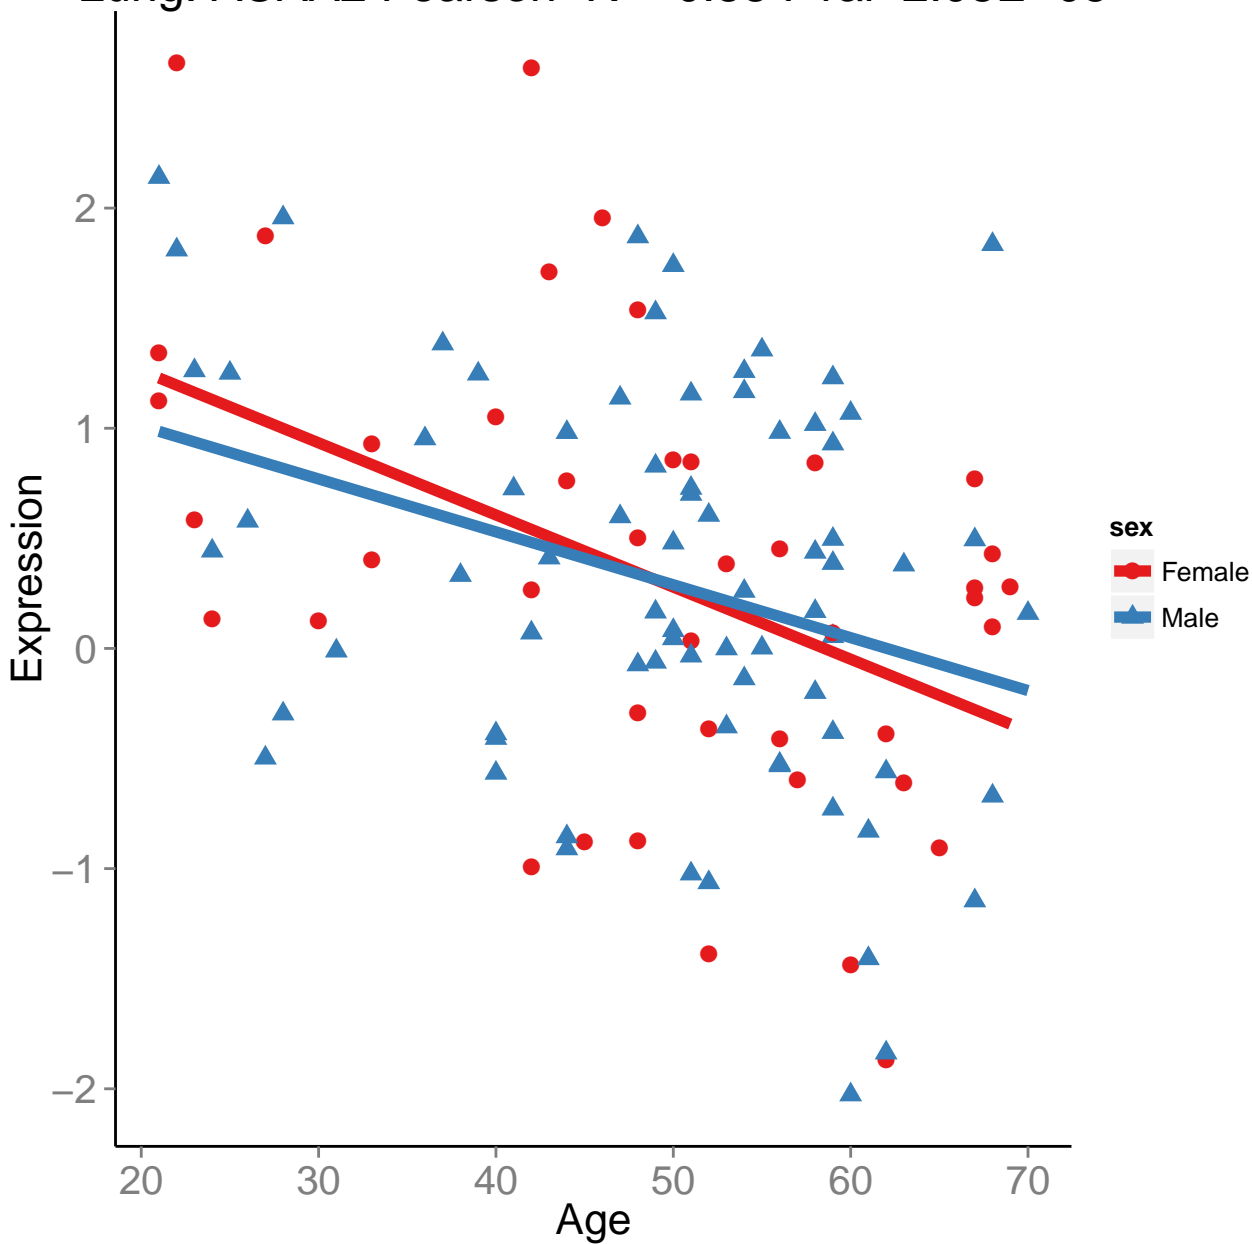

Lung: HSDL1 Pearson-R=-0.38 Pval=2.00E-05

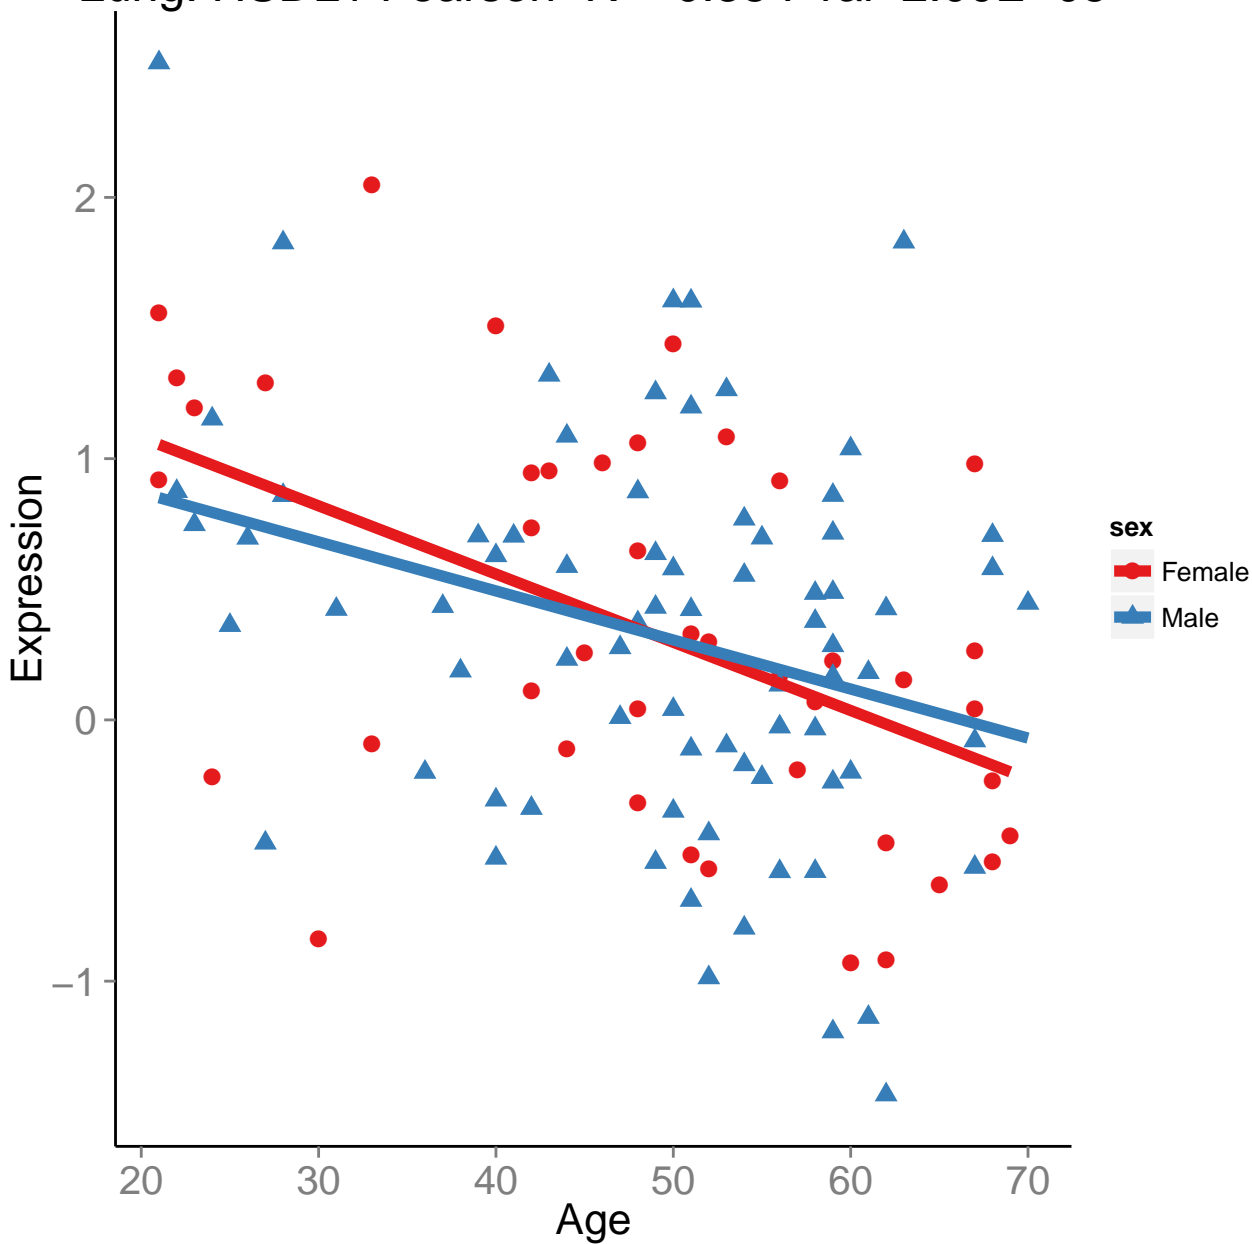

Lung: ST14 Pearson-R=-0.38 Pval=1.89E-05

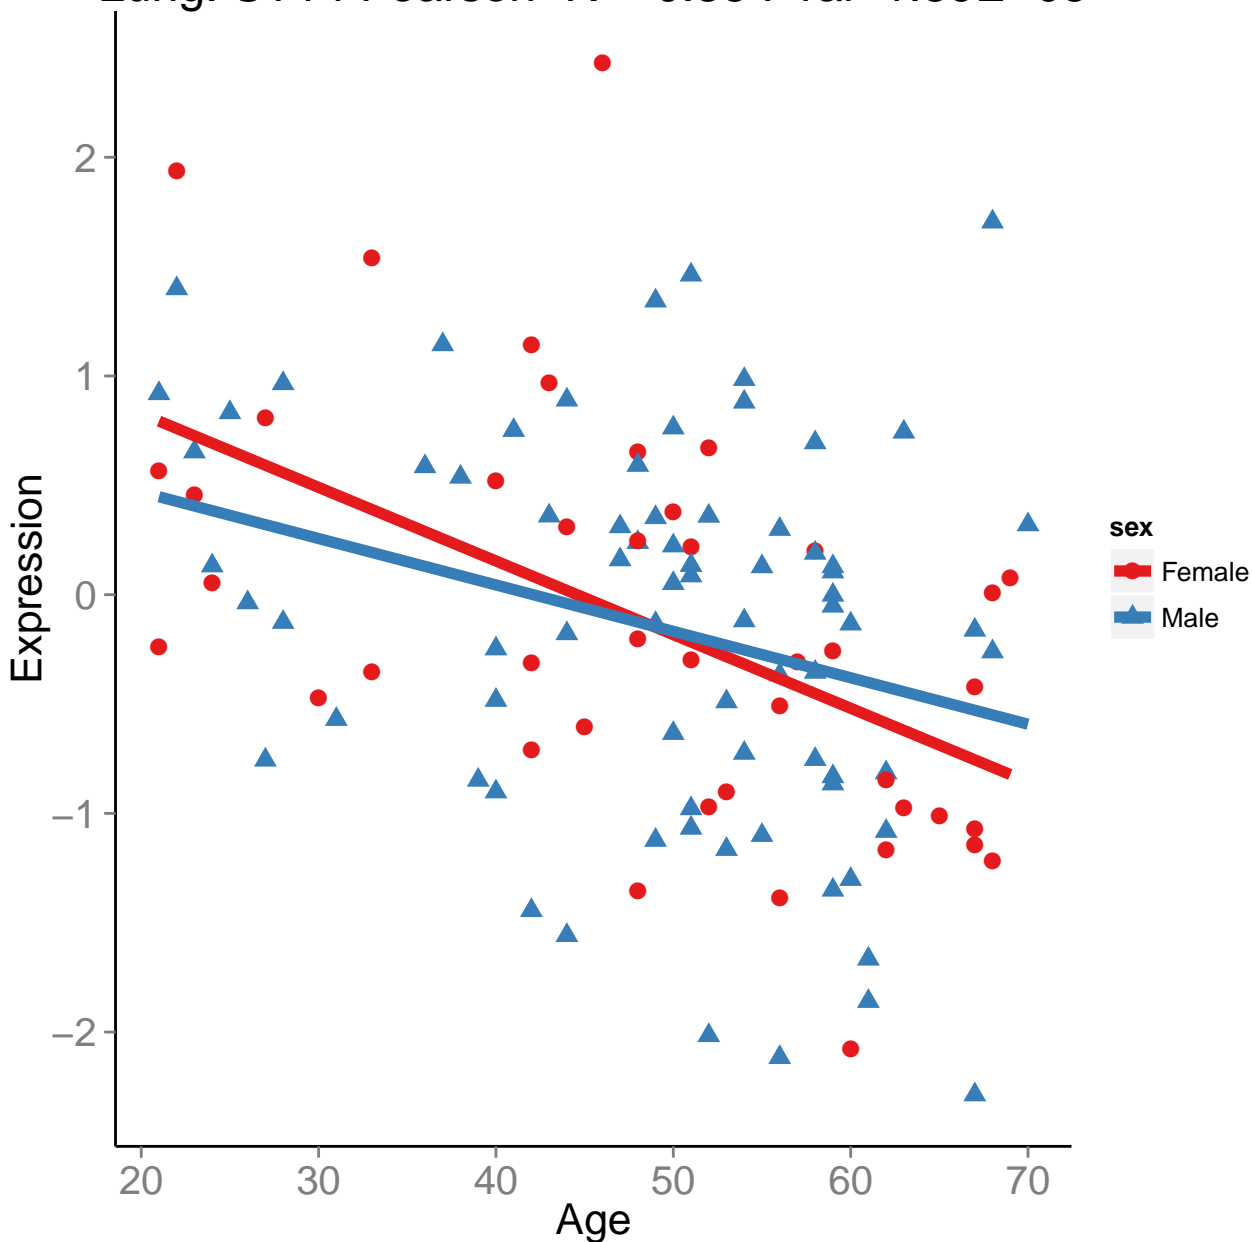



Lung: PTPN6 Pearson-R=-0.38 Pval=1.99E-05

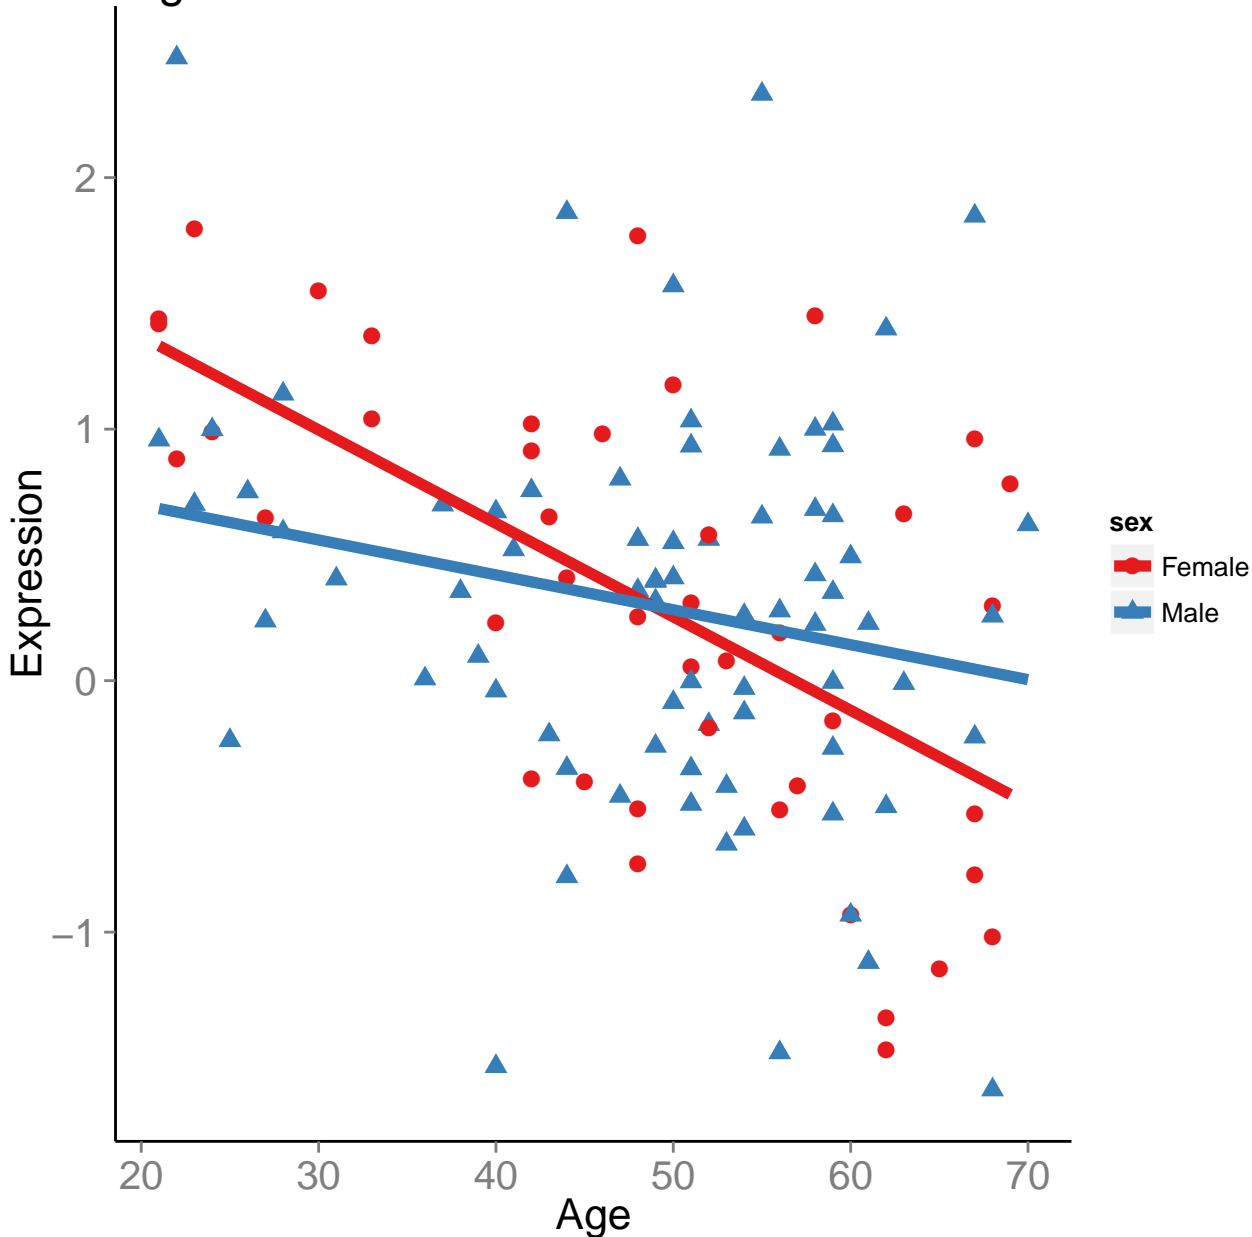

Muscle: UNC13C Pearson-R=0.56 Pval=5.52E-13

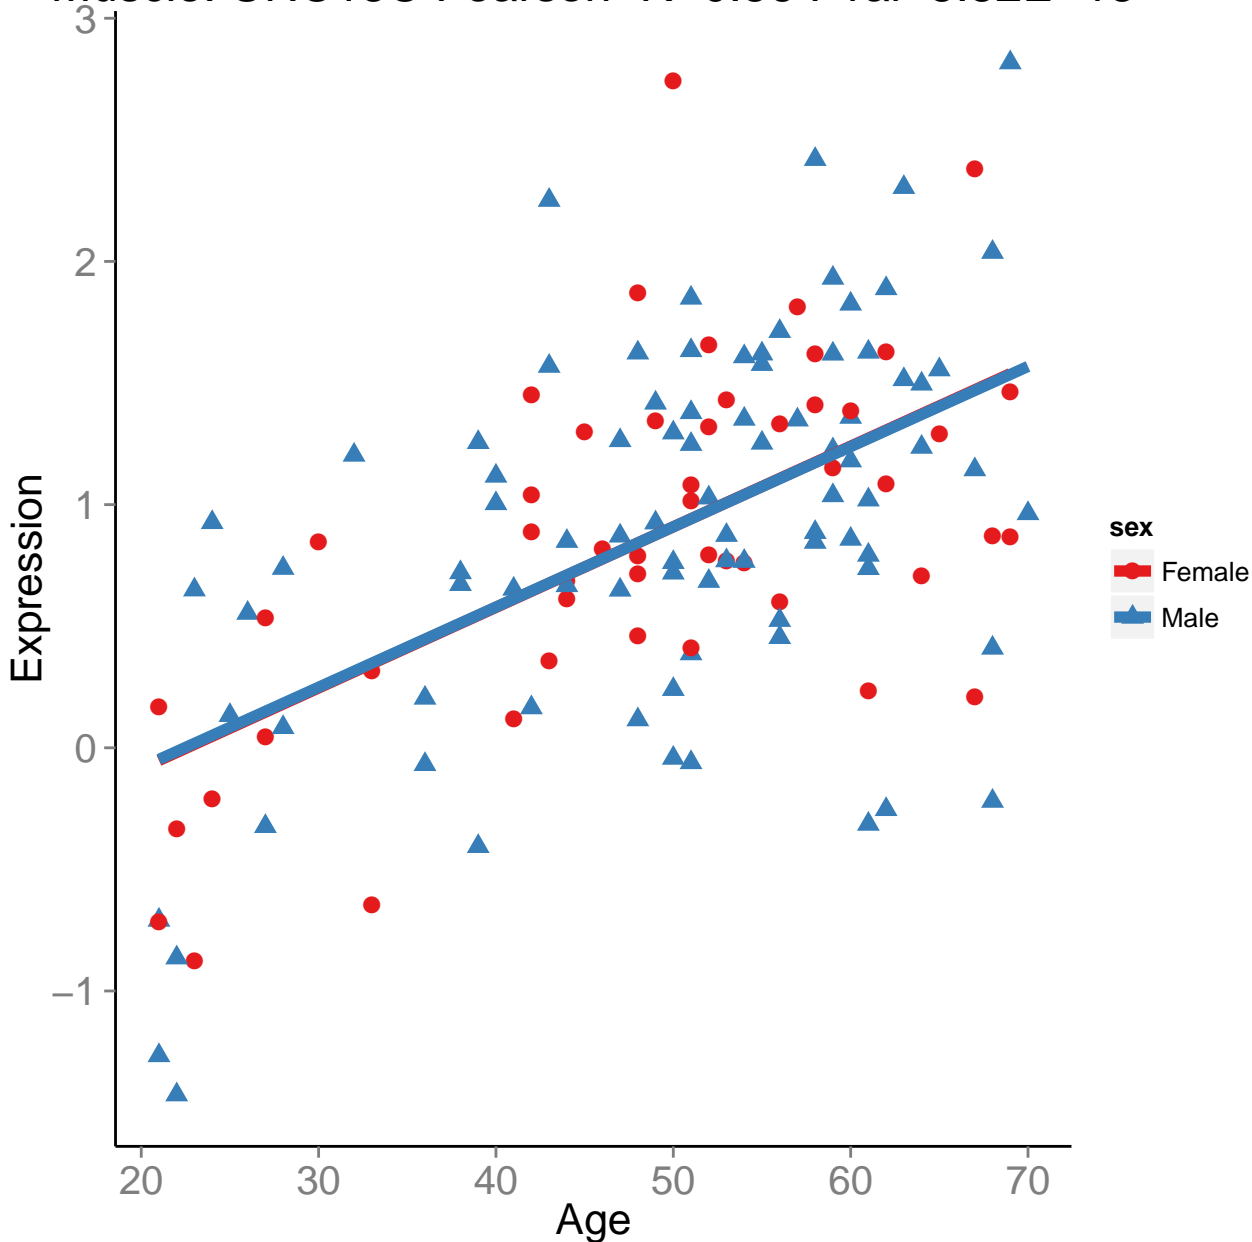

Muscle: GPATCH8 Pearson-R=0.52 Pval=7.30E-11

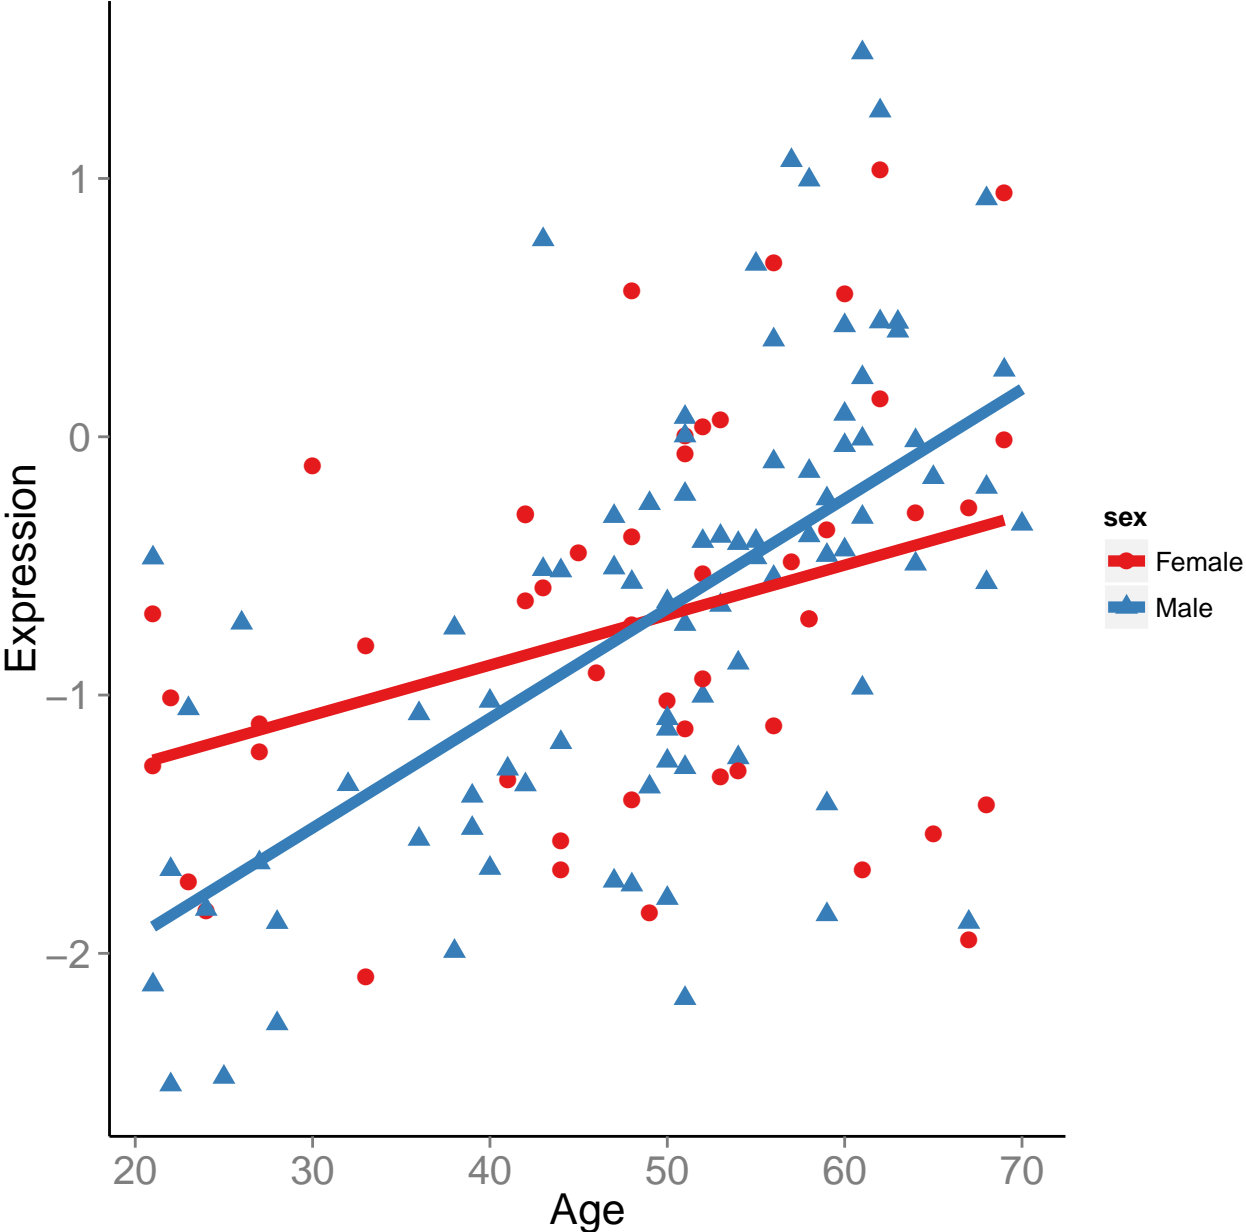

Muscle: EPB41L3 Pearson-R=0.52 Pval=8.50E-11

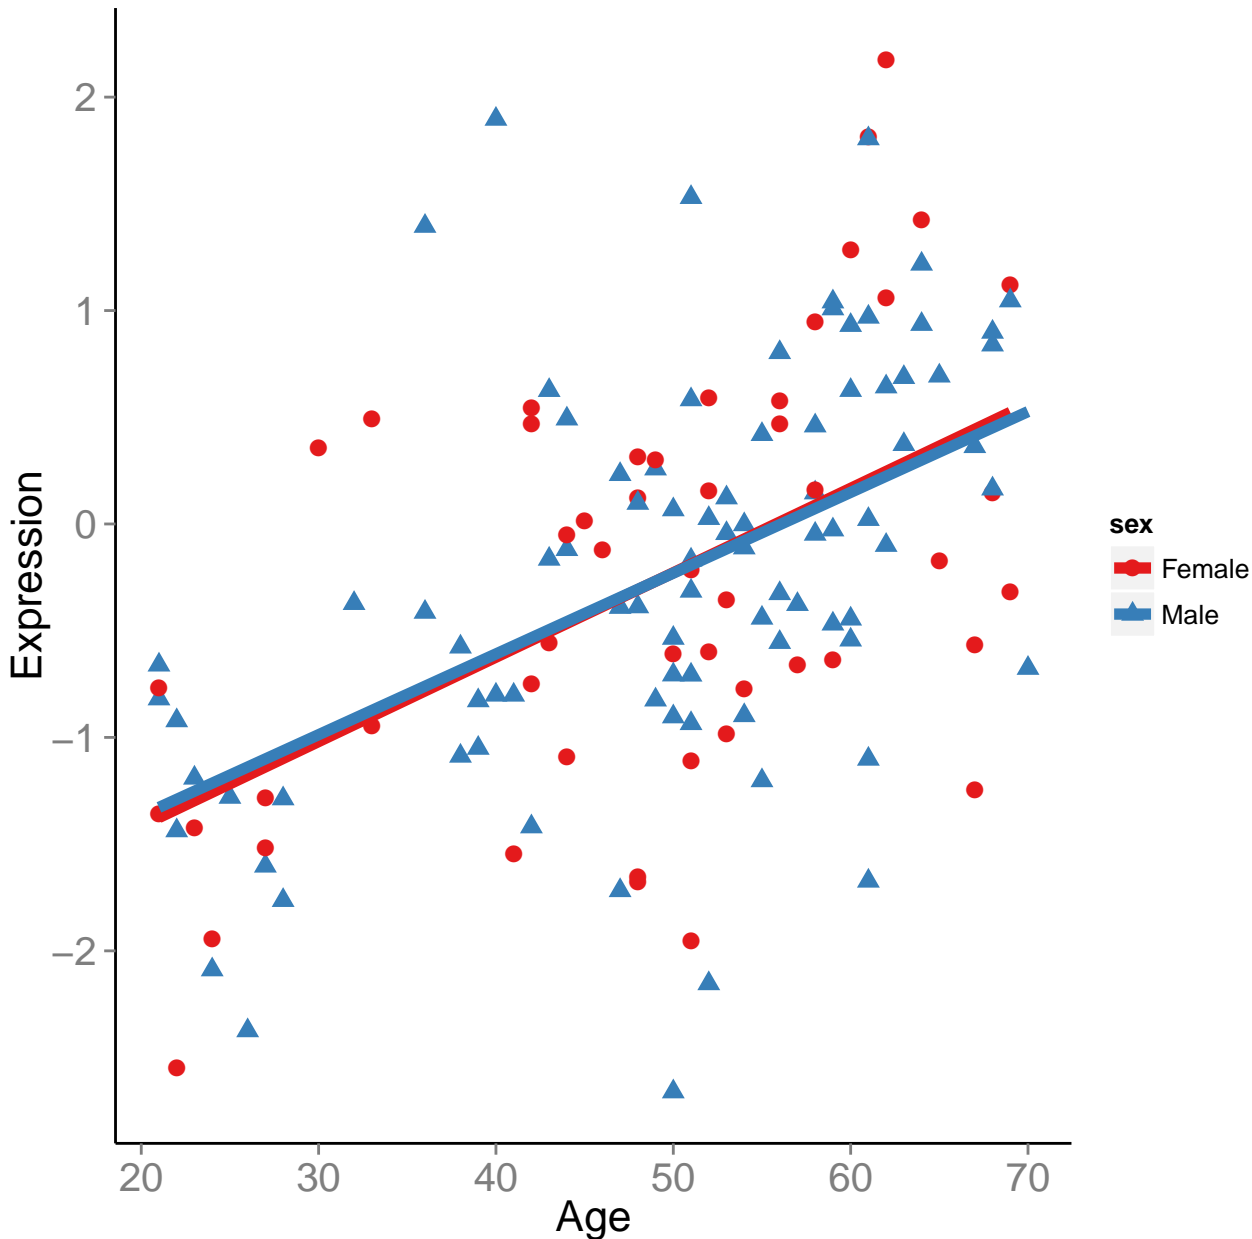

Muscle: FDXR Pearson-R=0.49 Pval=8.85E-10

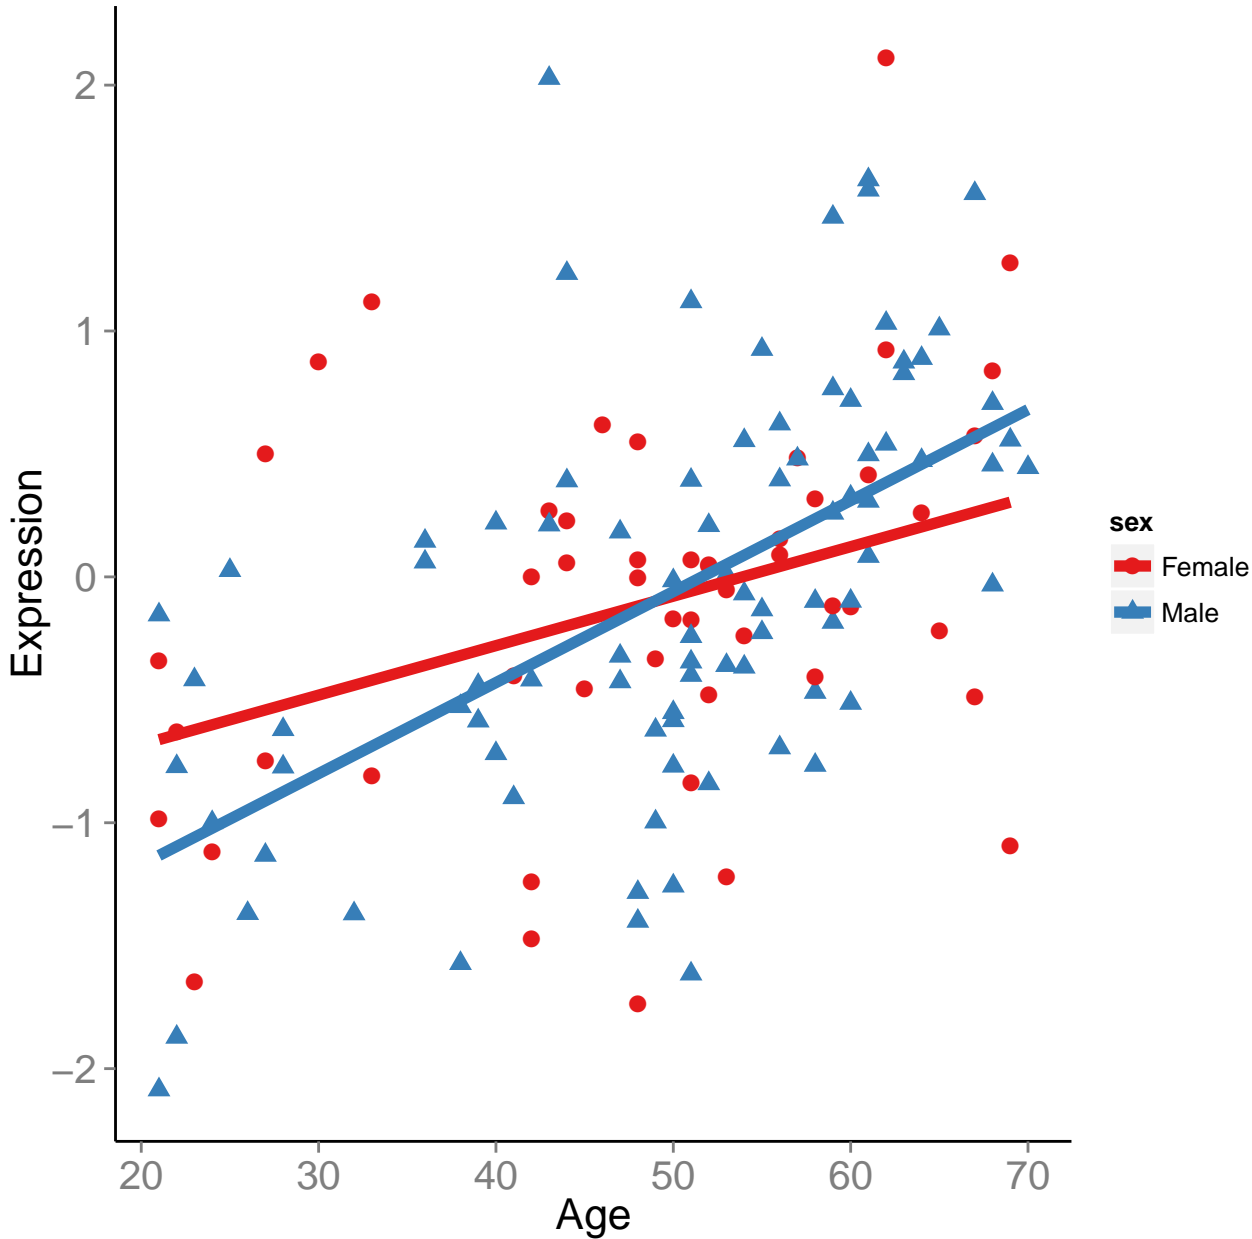

Muscle: KANSL1 Pearson-R=0.49 Pval=7.78E-10

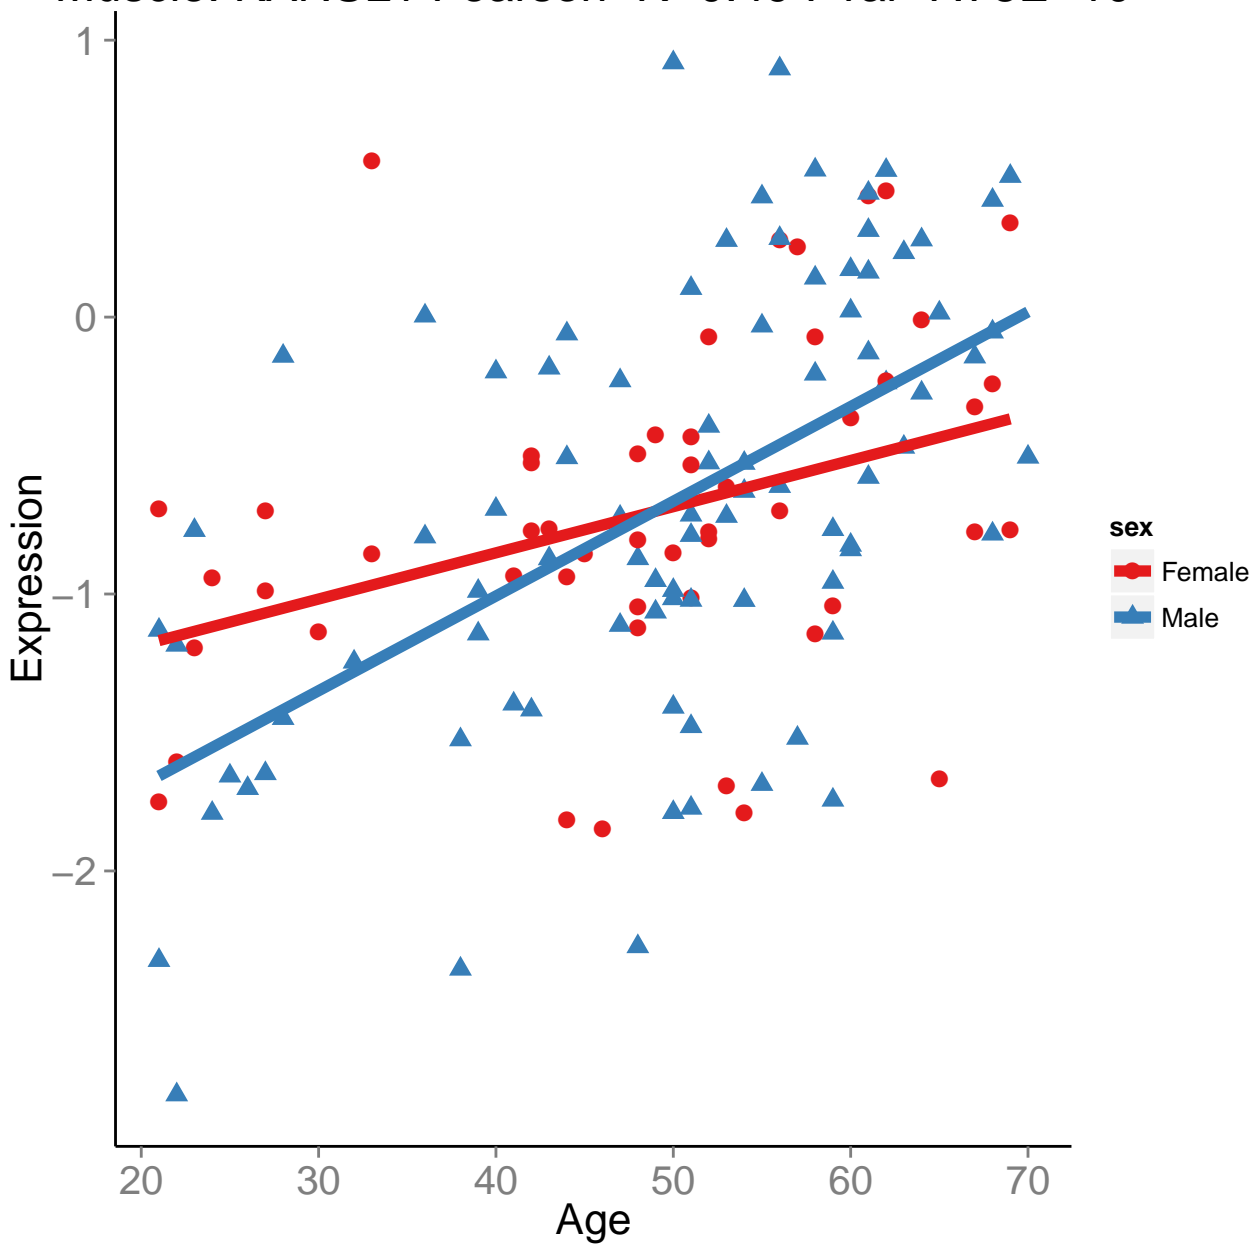

Muscle: SKAP2 Pearson-R=0.49 Pval=1.22E-09

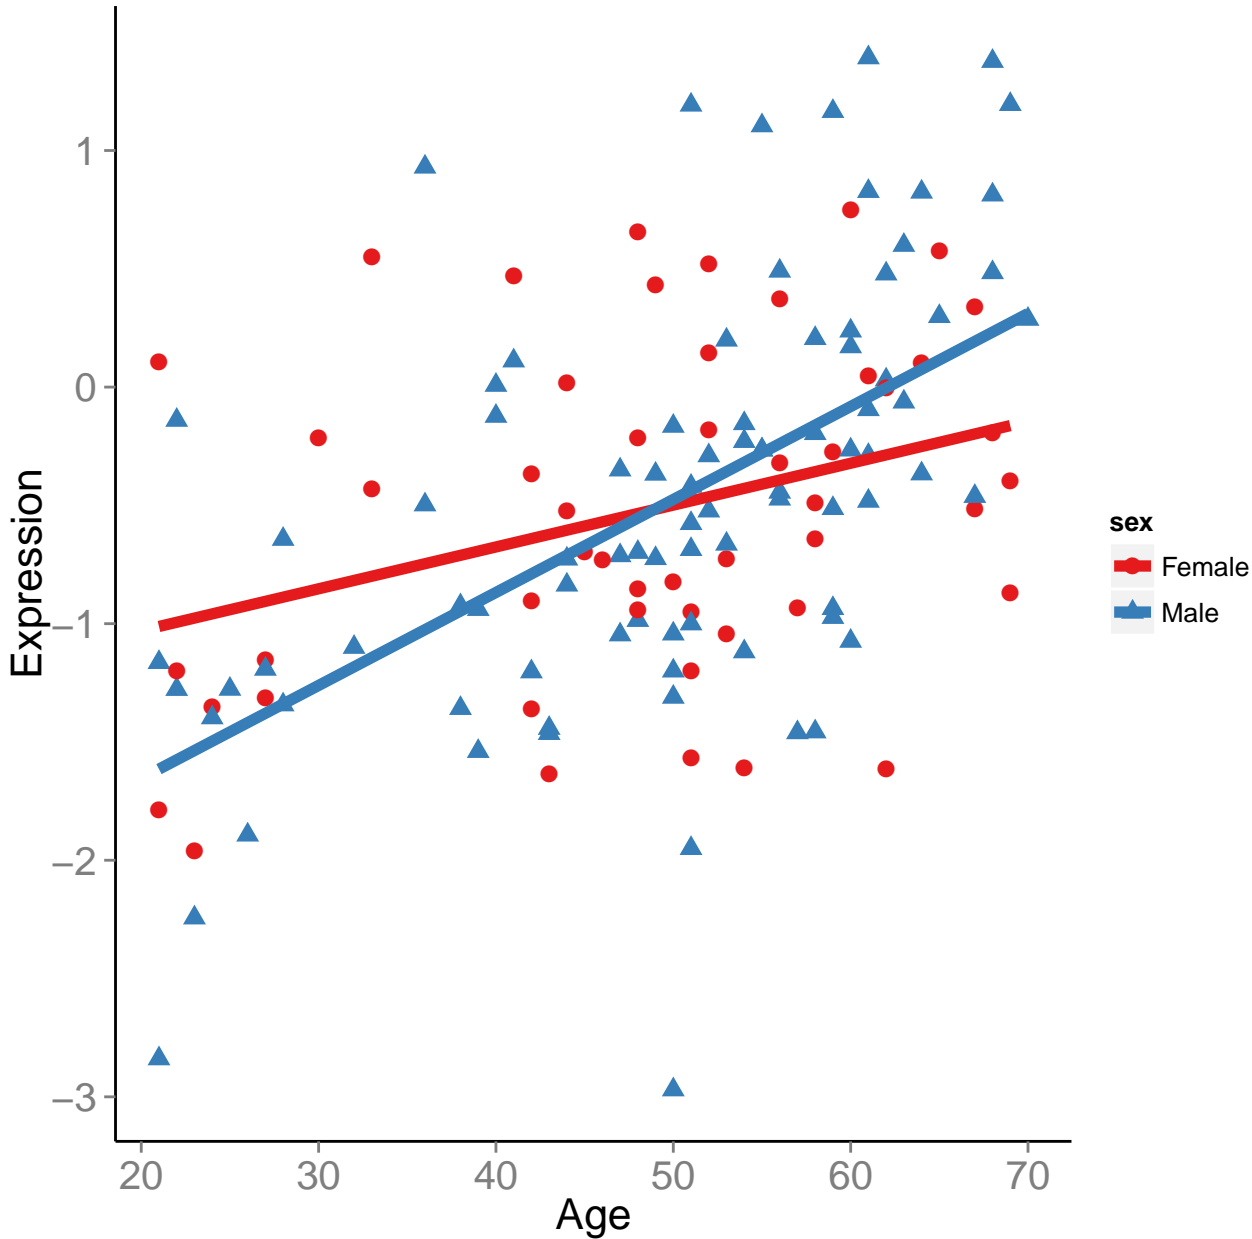

Muscle: FAM171A1 Pearson-R=-0.48 Pval=1.98E-09

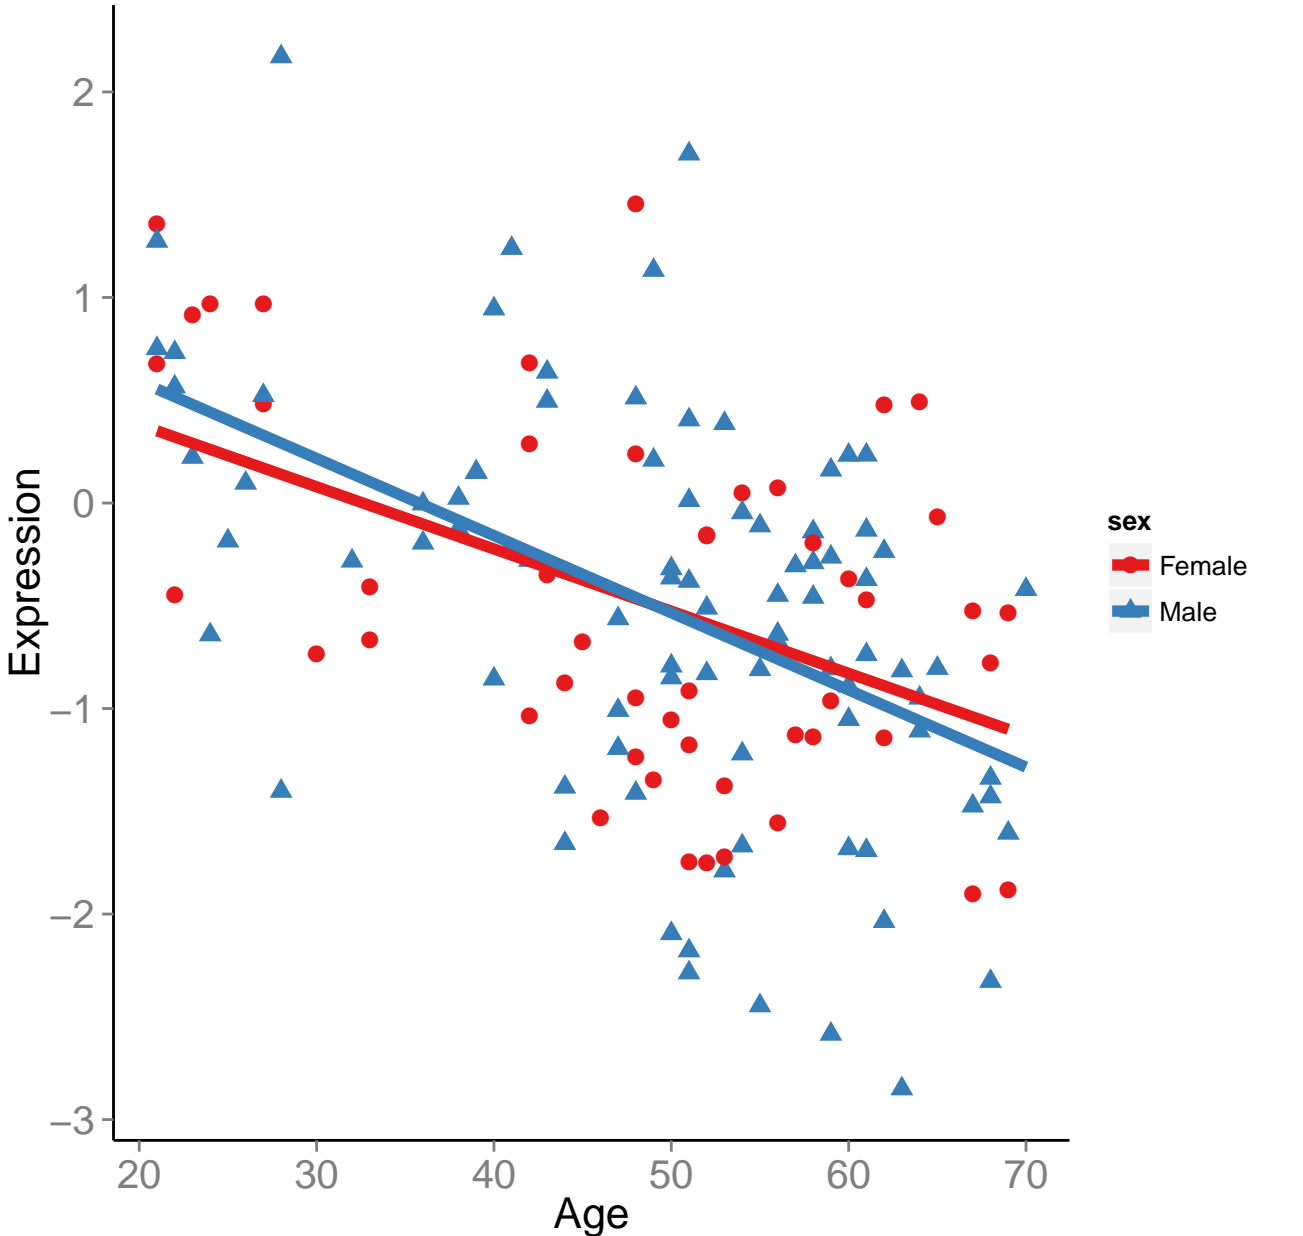



Muscle: SCAP Pearson-R=0.48 Pval=2.54E-09

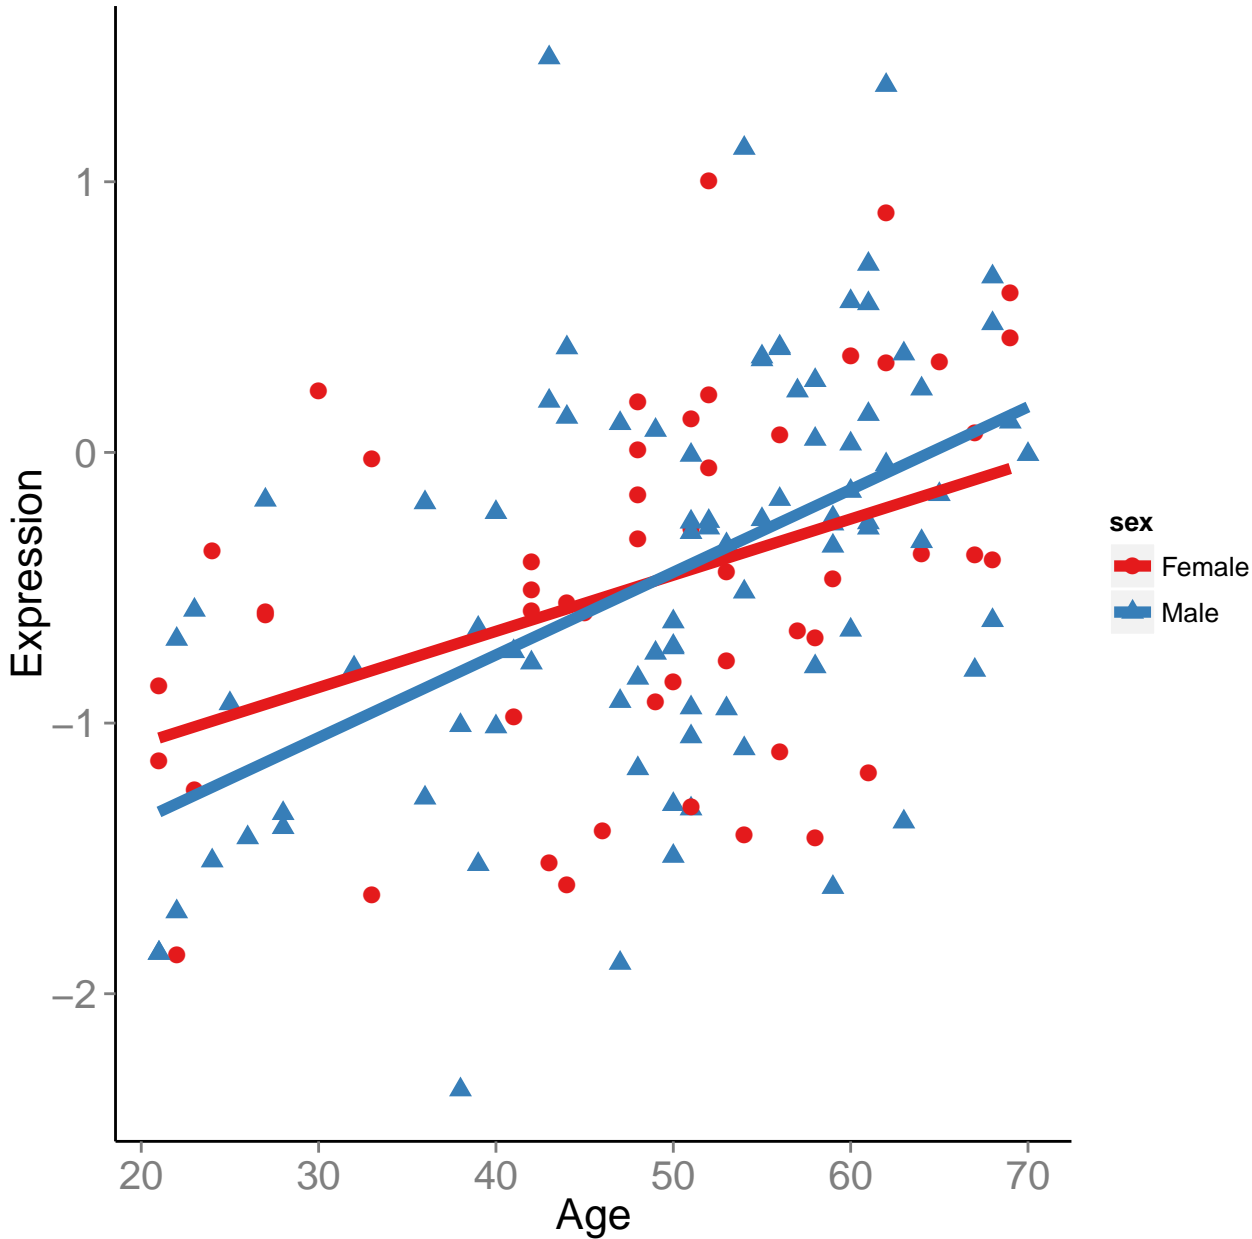

Muscle: CPSF7 Pearson-R=0.48 Pval=3.51E-09

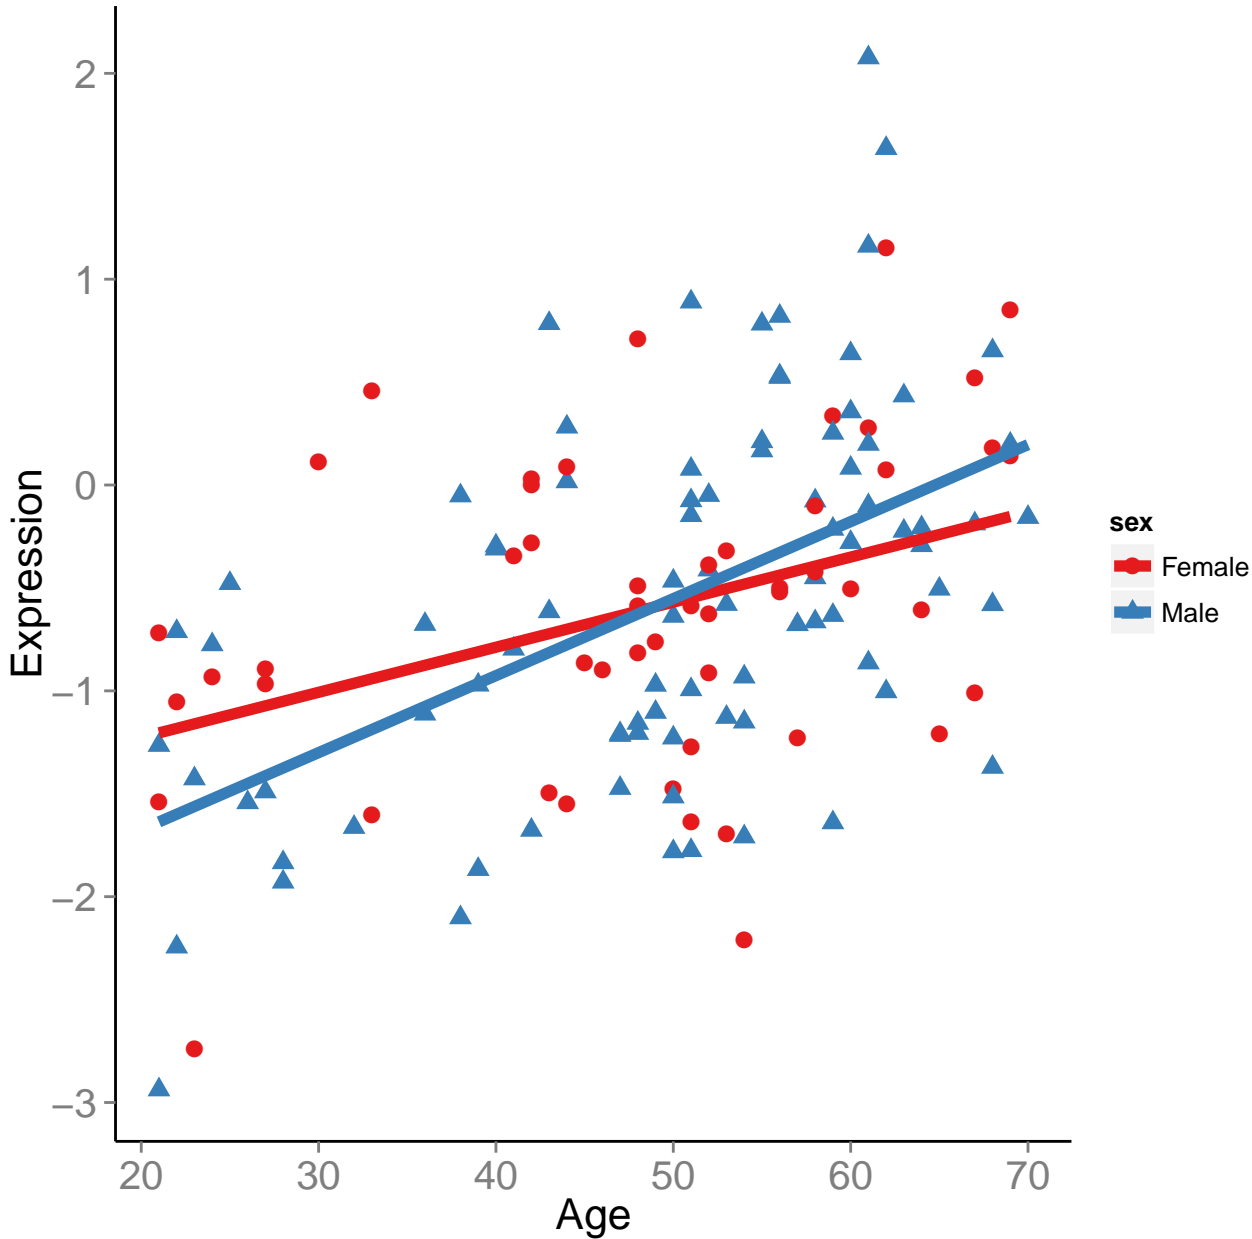

Muscle: ANKRD17 Pearson-R=0.46 Pval=1.17E-08

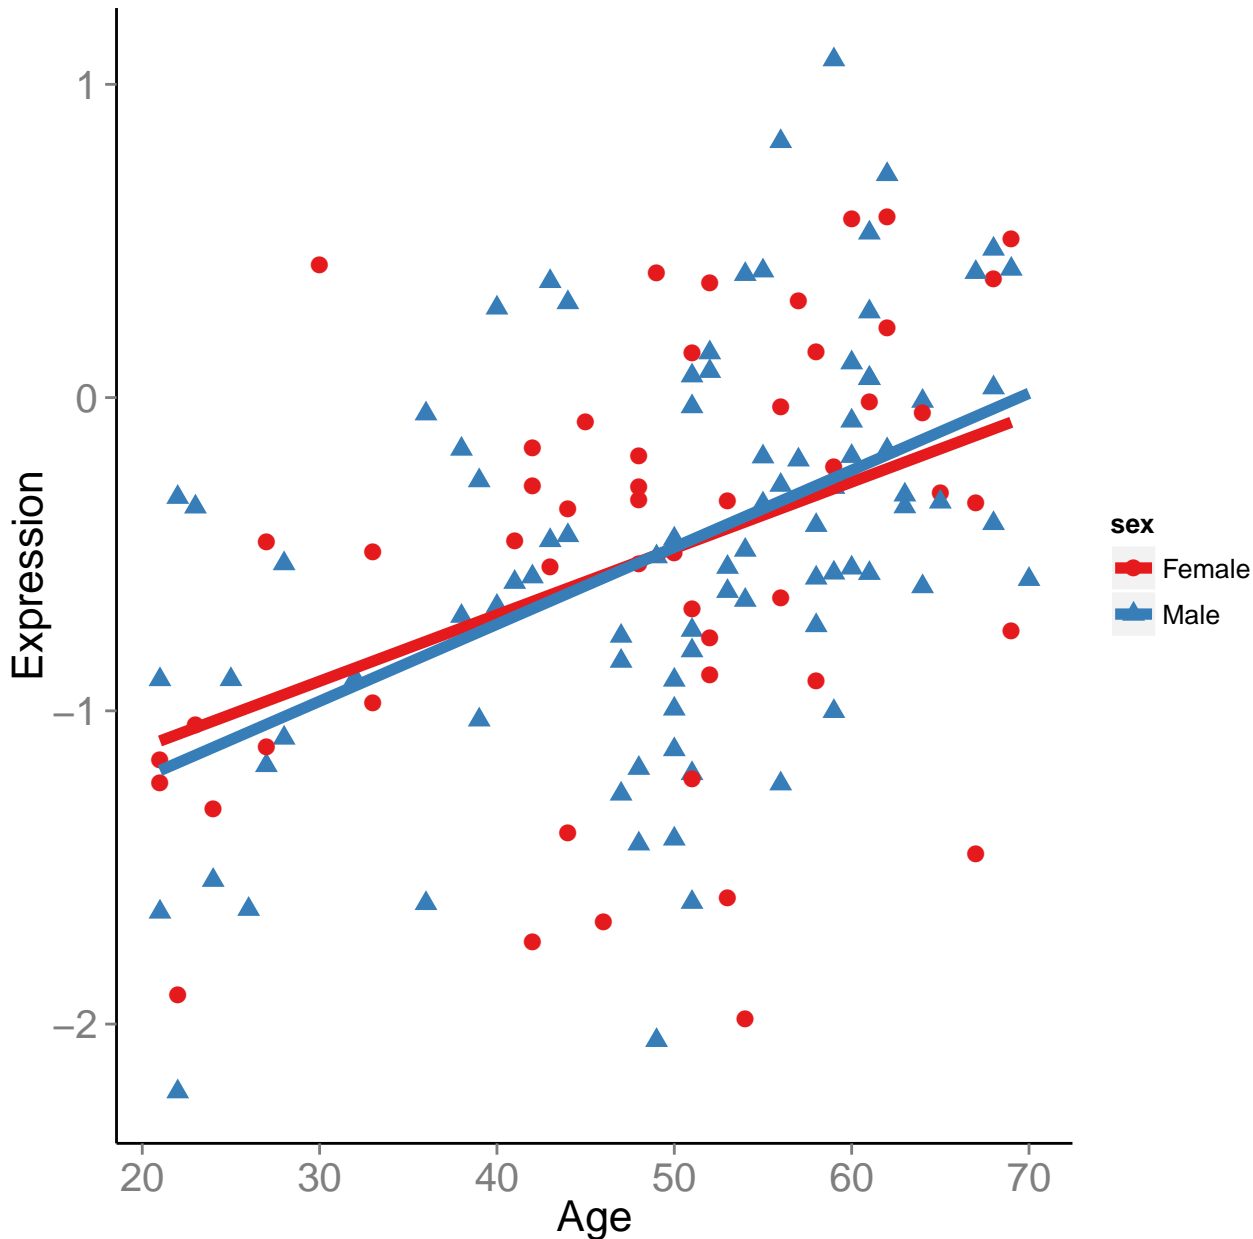

Muscle: ZNF335 Pearson-R=0.46 Pval=1.10E-08

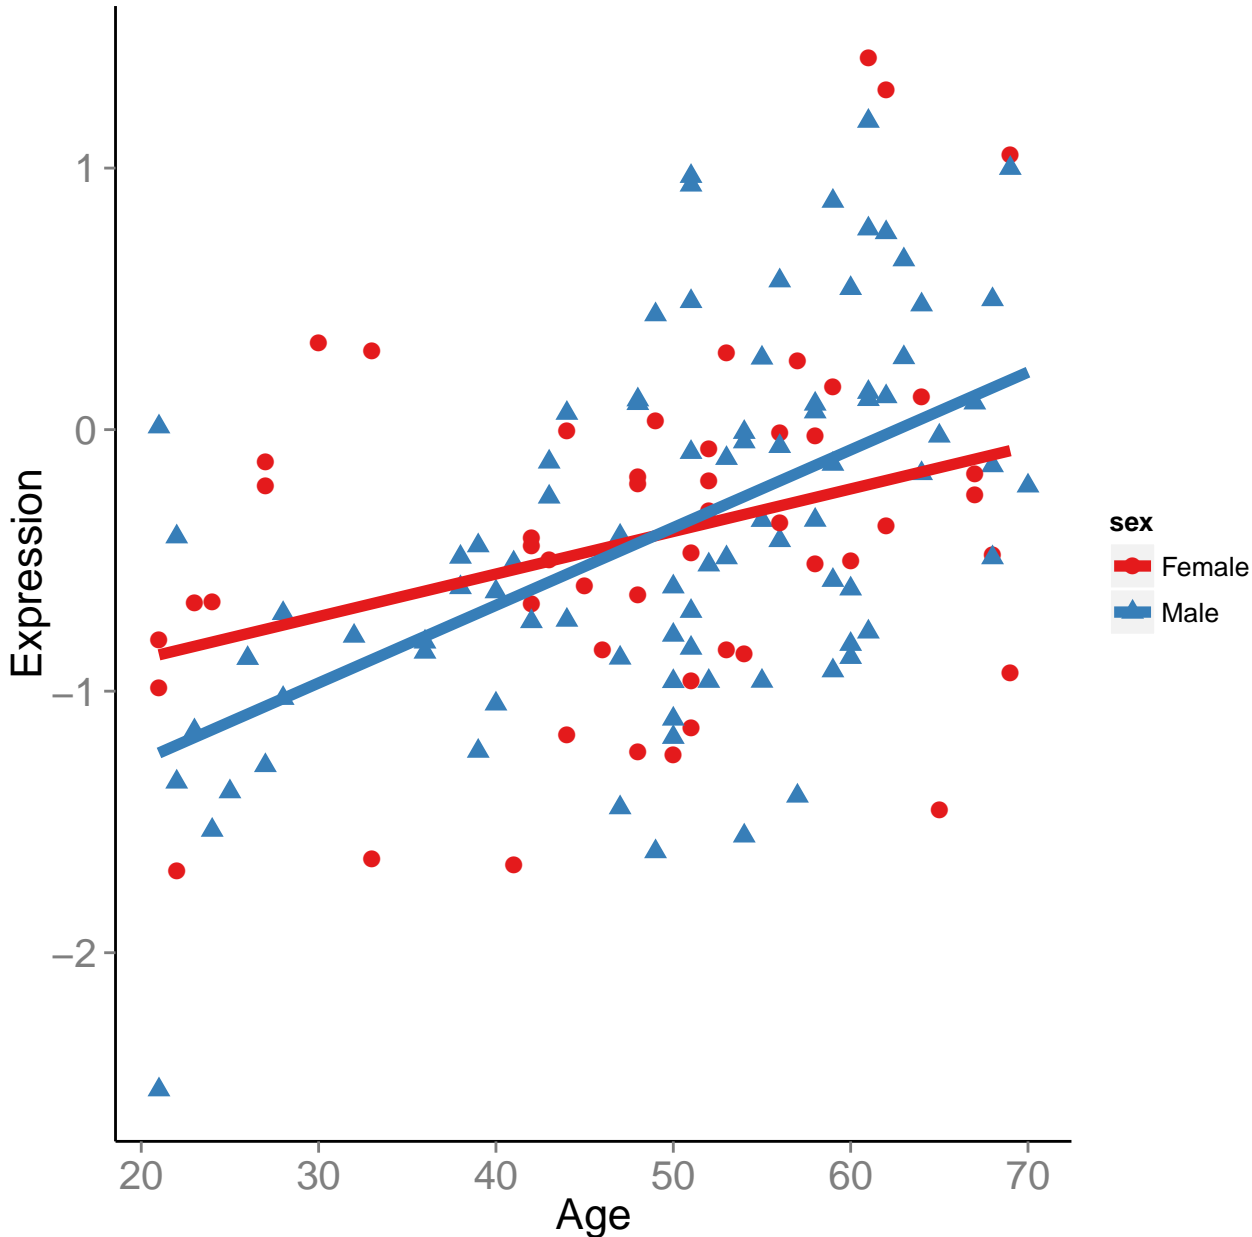

Muscle: TMEM175 Pearson-R=0.45 Pval=2.52E-08

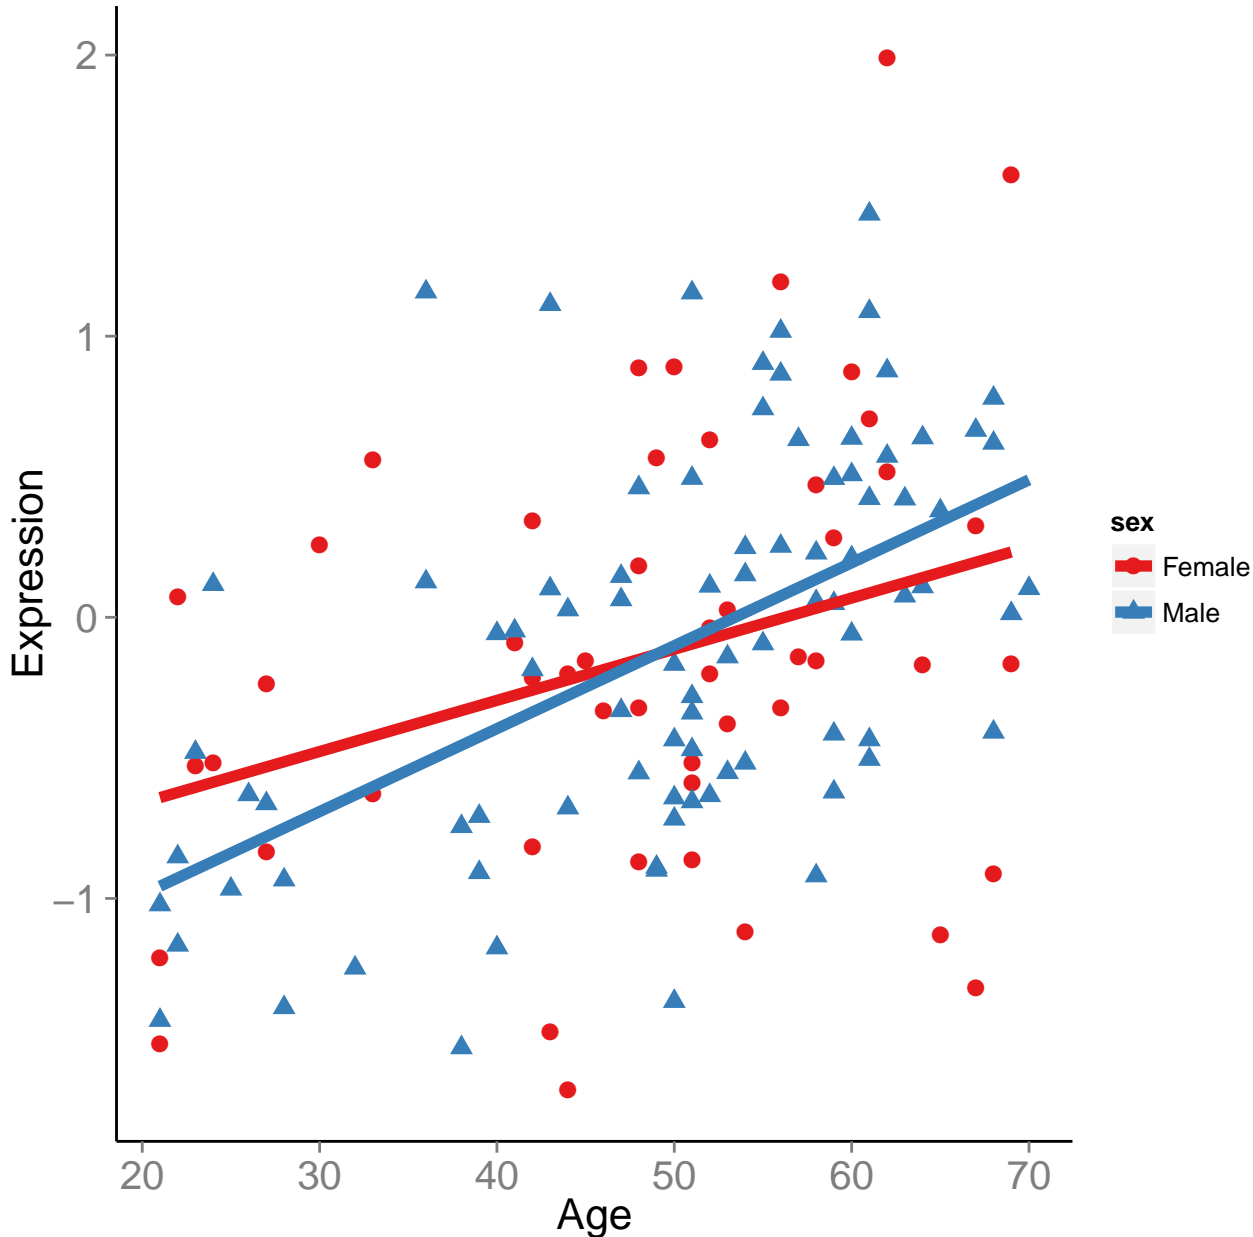

Muscle: CNOT3 Pearson-R=0.45 Pval=3.62E-08

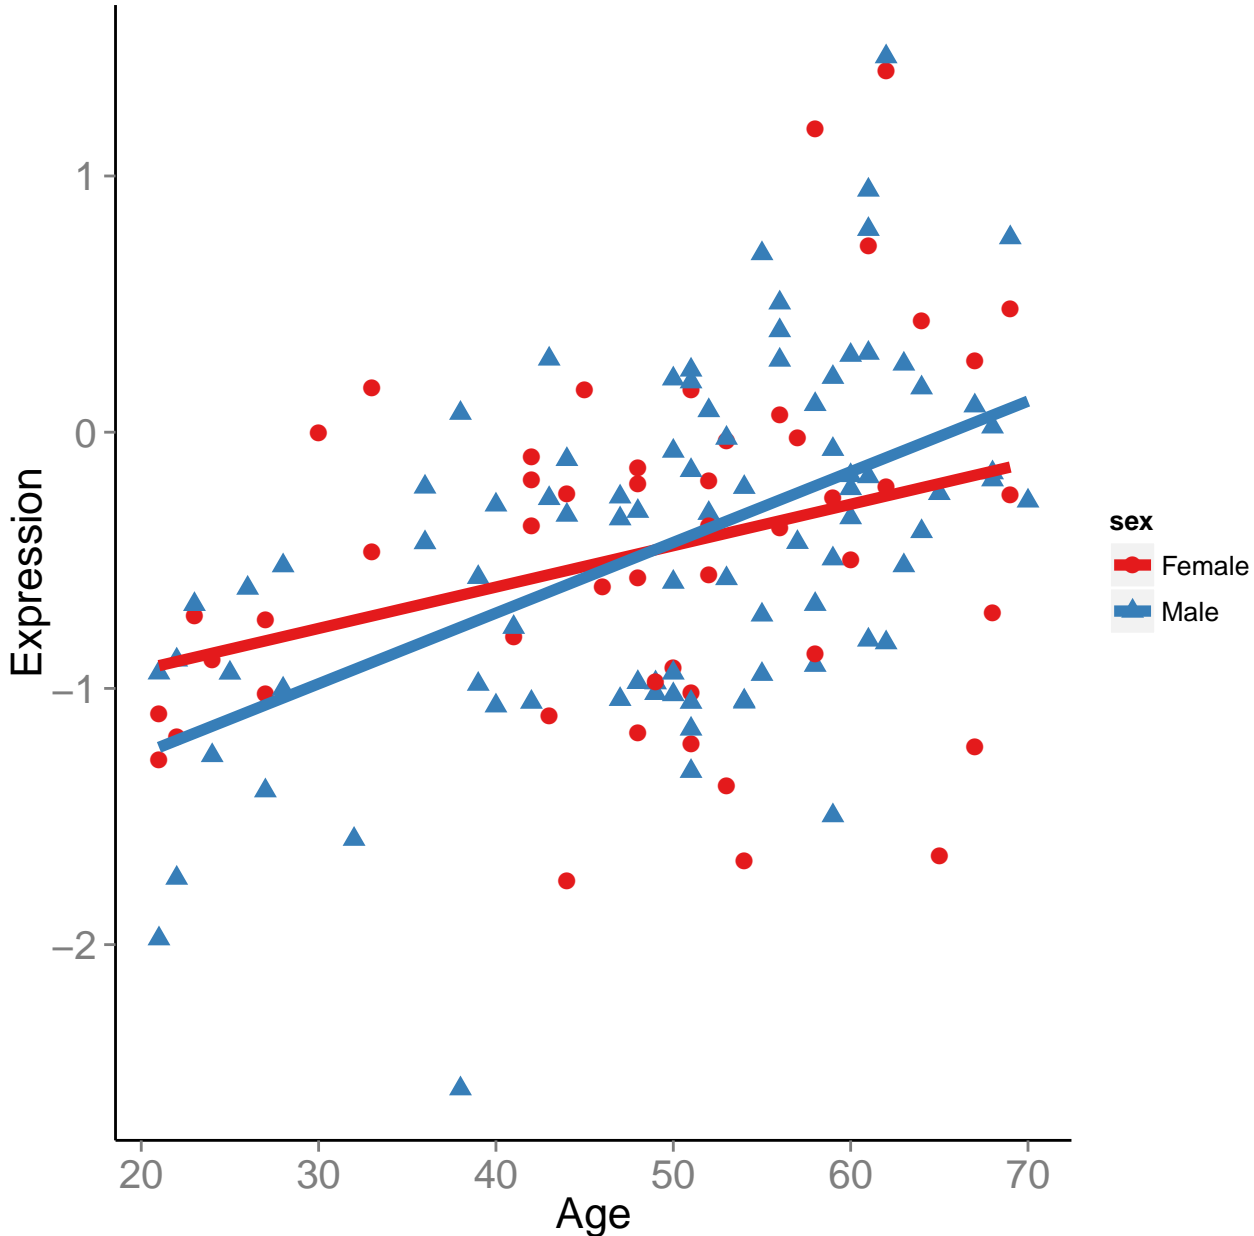

Muscle: RHOD Pearson-R=-0.44 Pval=5.68E-08

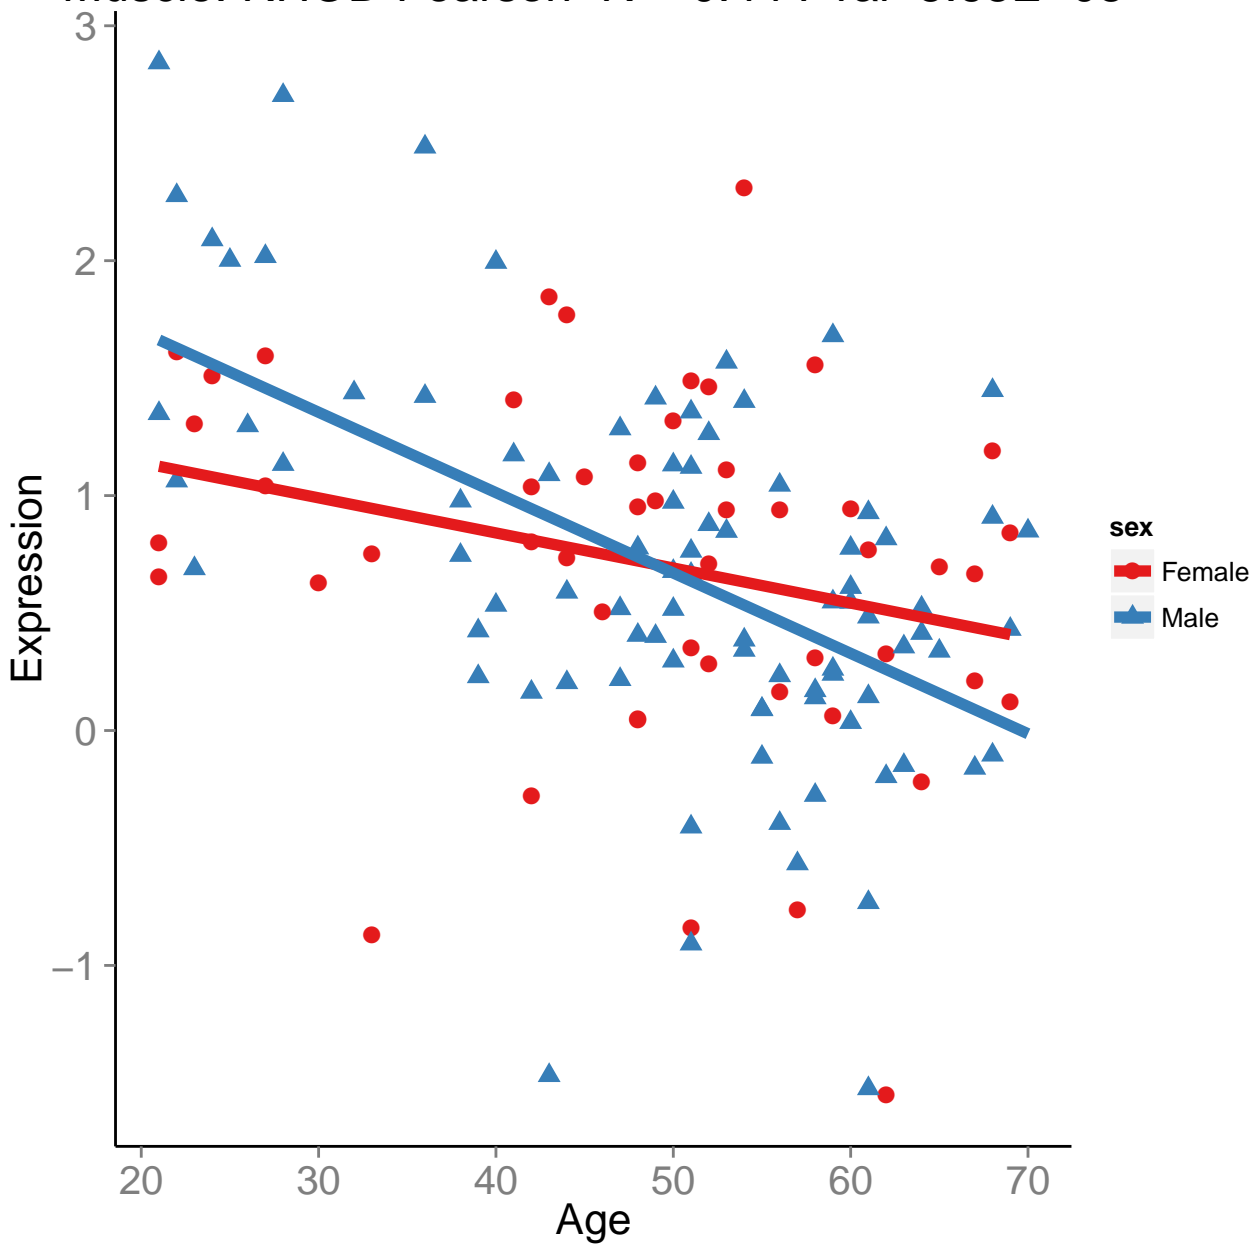

Muscle: FUK Pearson-R=0.44 Pval=6.10E-08

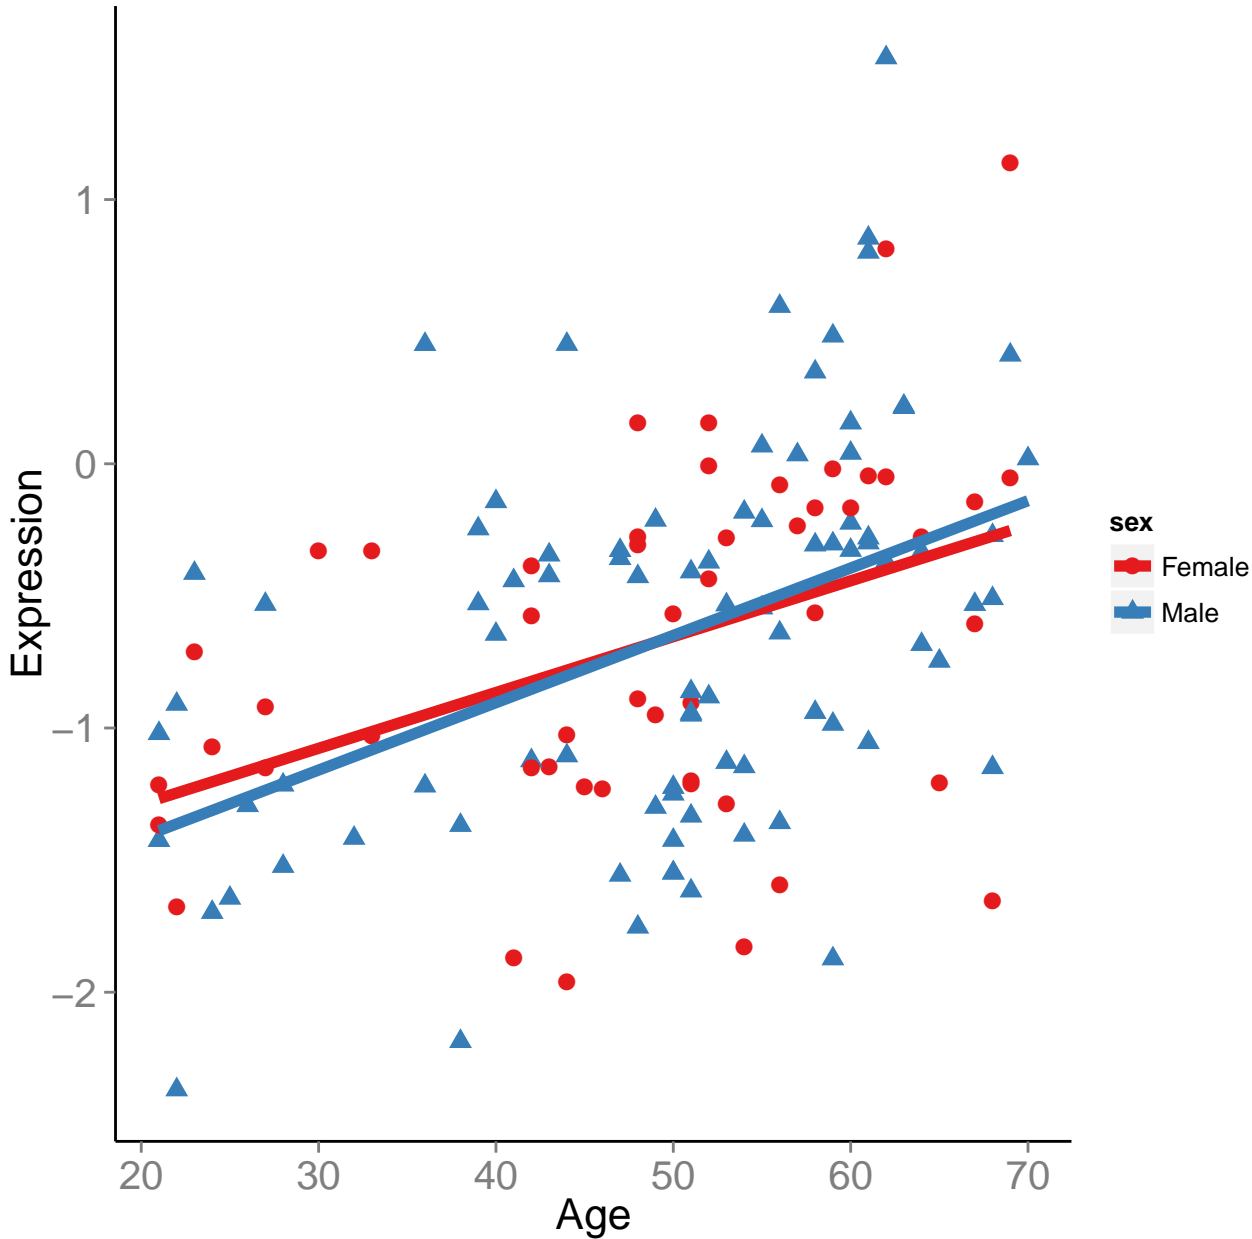



Muscle: NCOA1 Pearson-R=0.44 Pval=6.86E-08

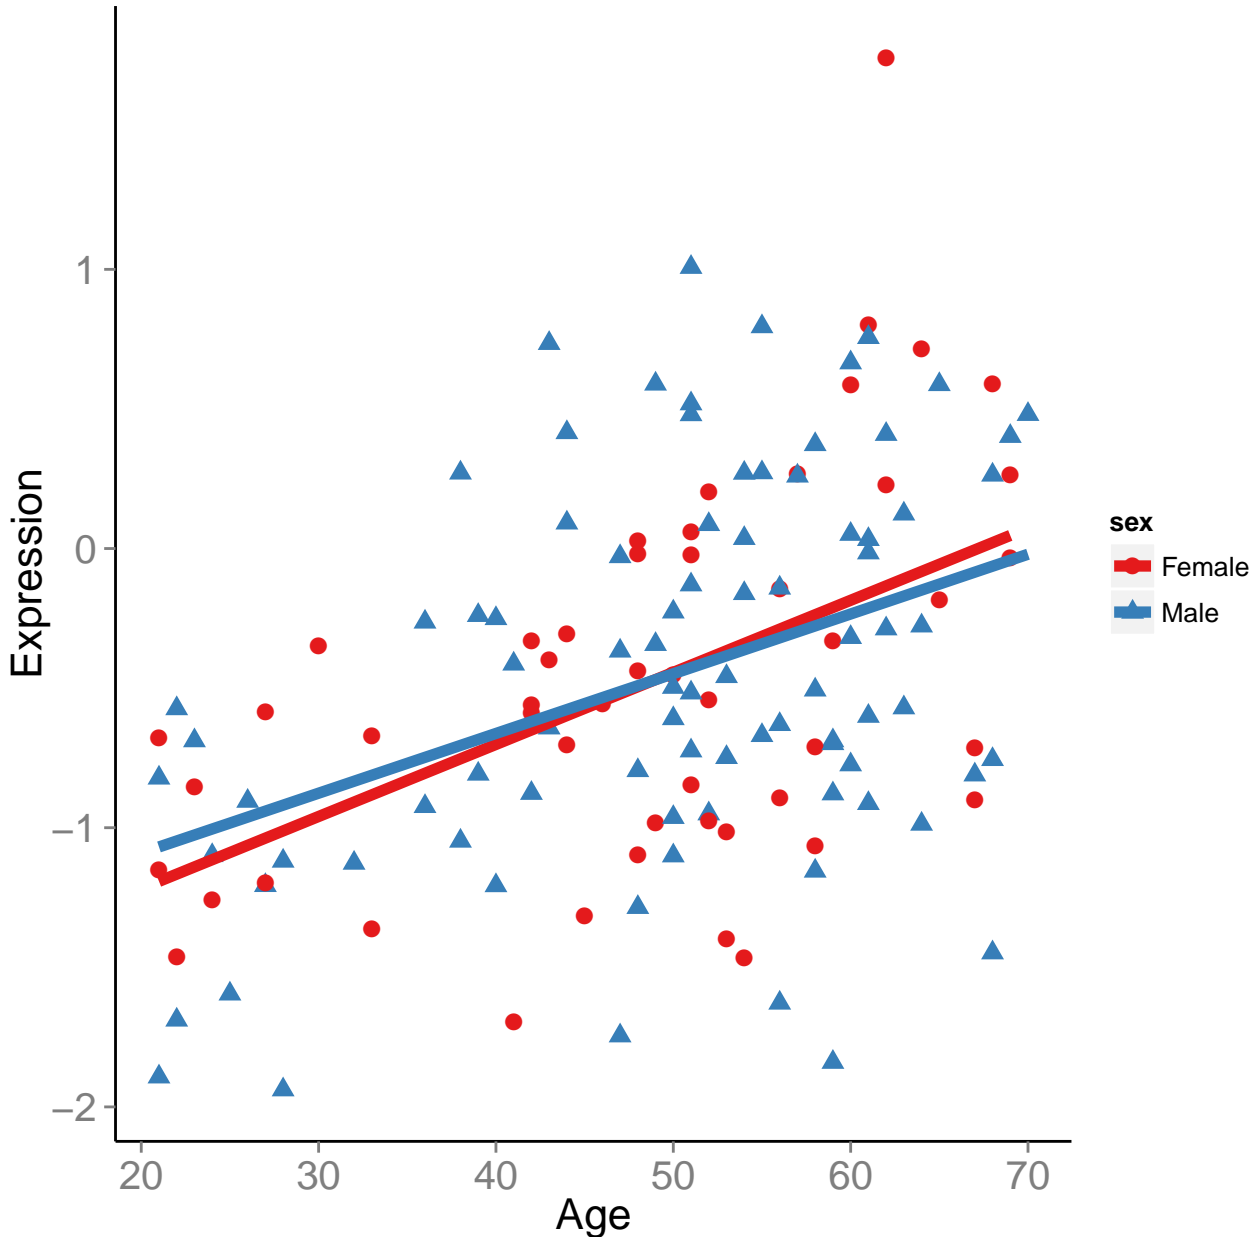

Muscle: DMRT2 Pearson-R=-0.44 Pval=9.12E-08

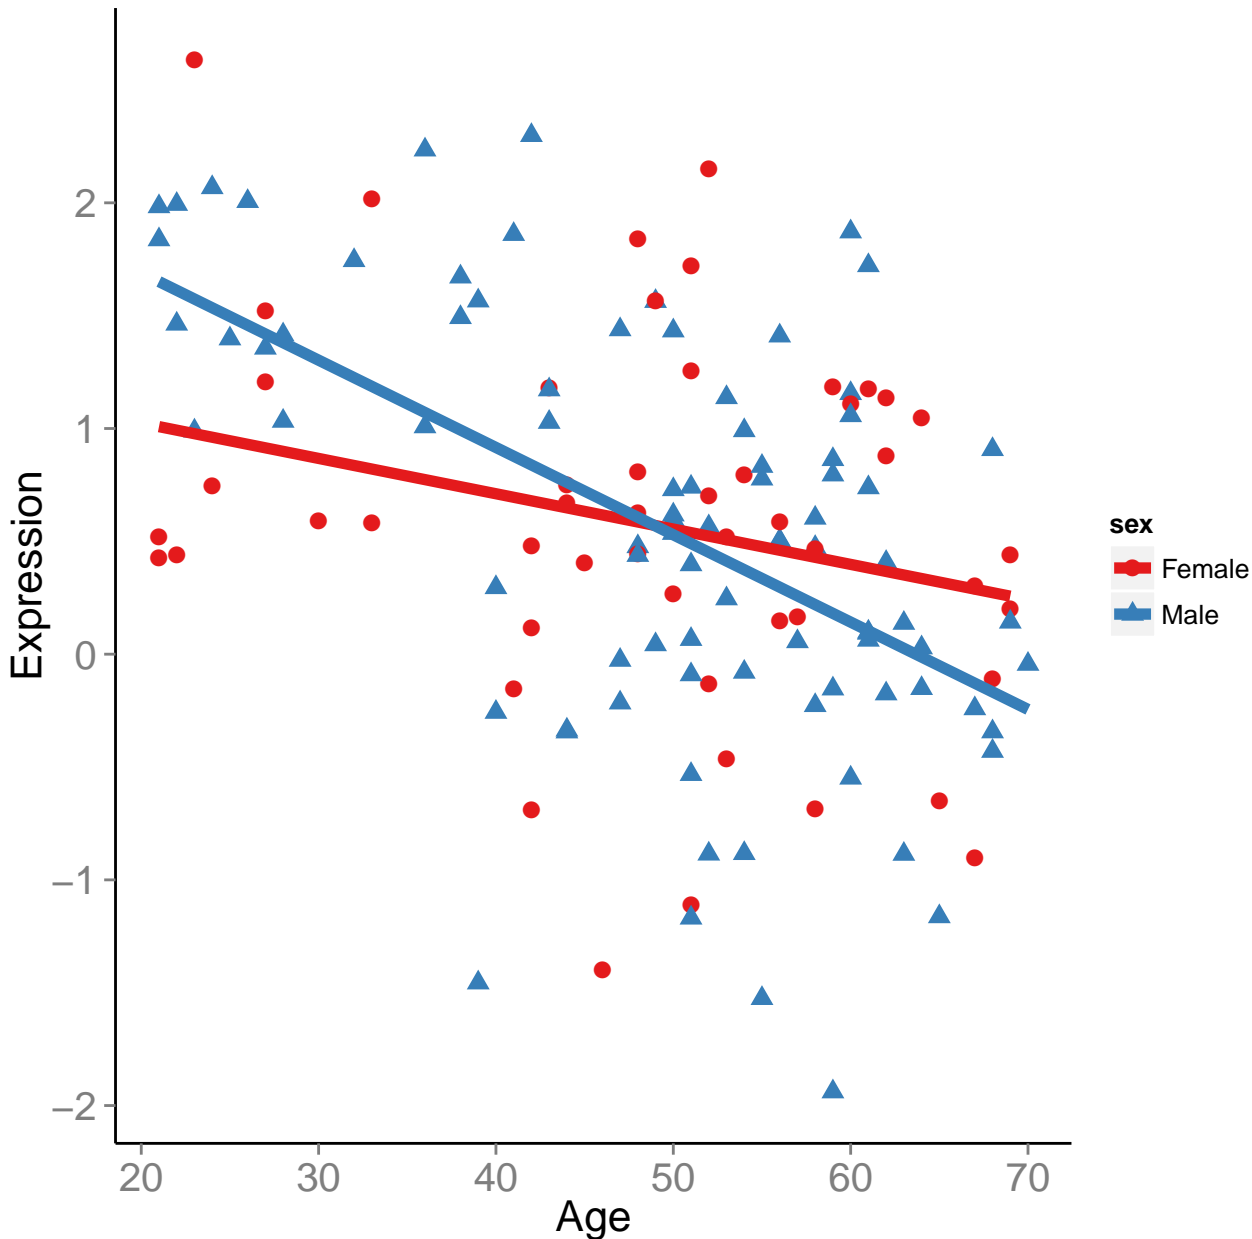

Muscle: ZFYVE16 Pearson-R=0.44 Pval=8.46E-08

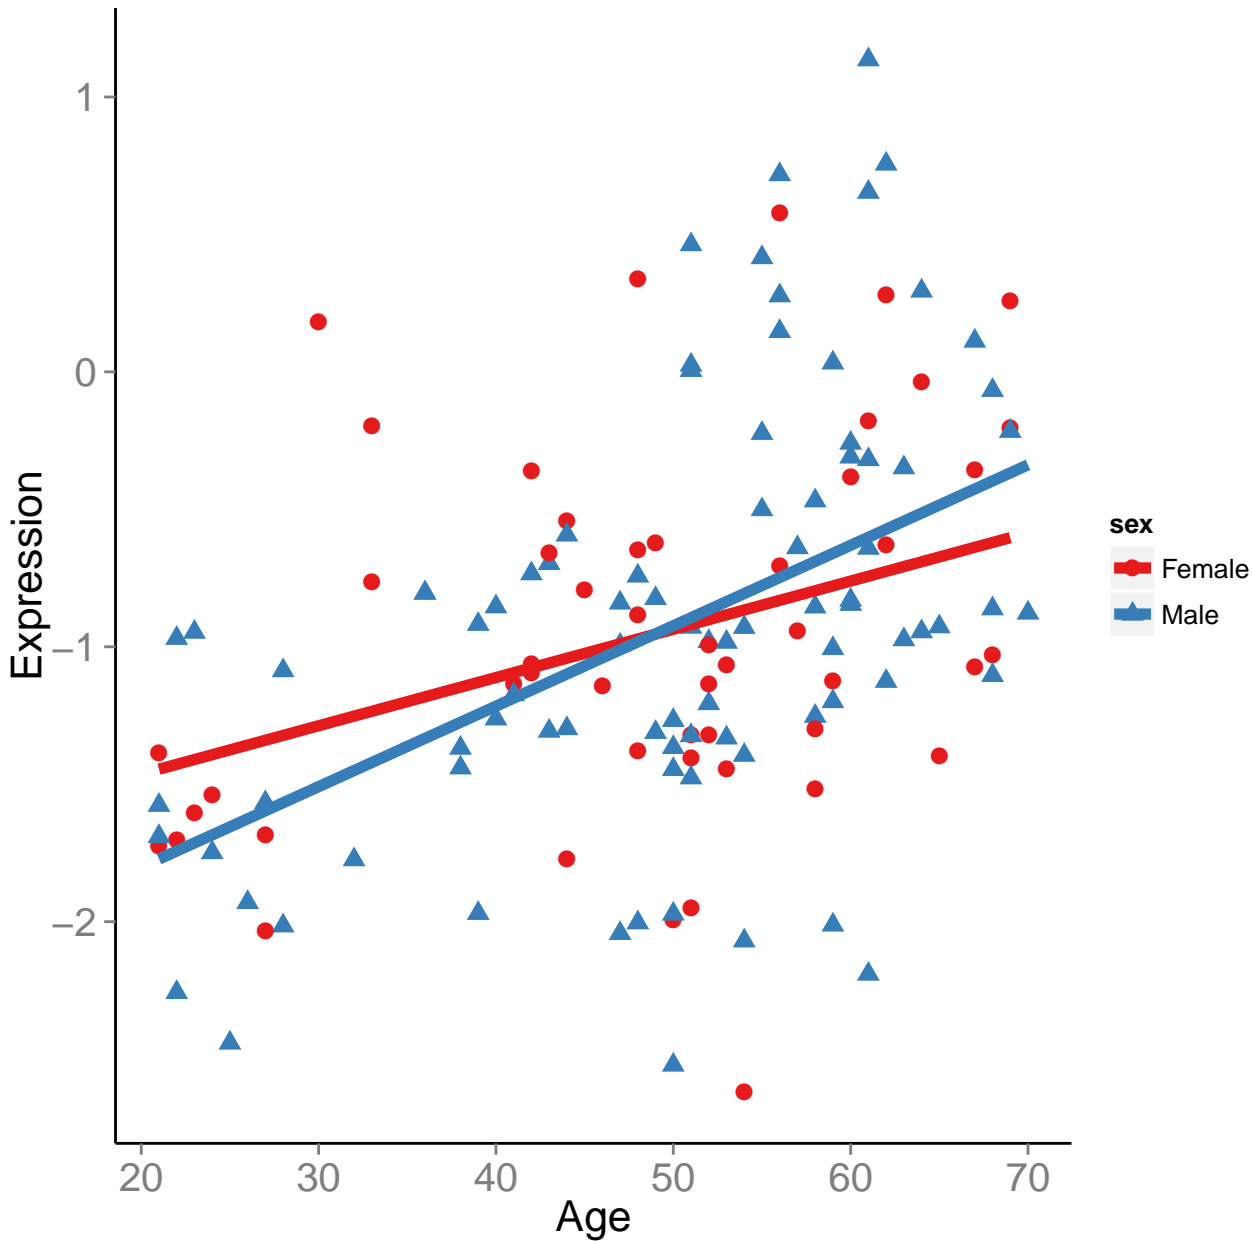

Muscle: NHLRC2 Pearson-R=0.44 Pval=9.18E-08

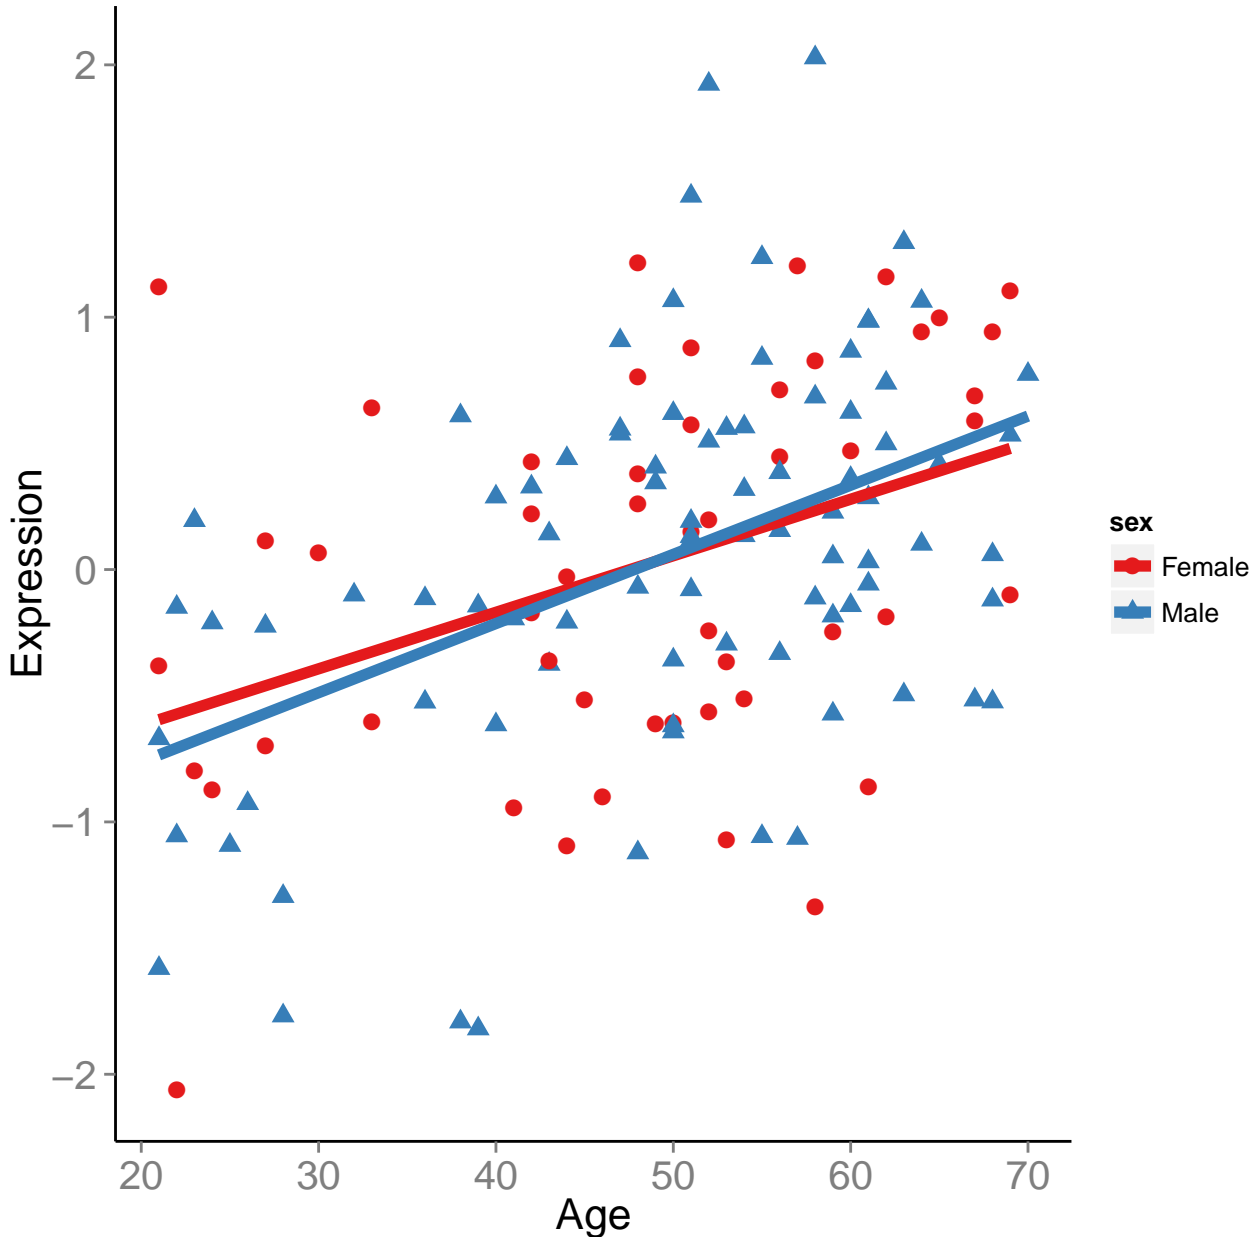

Muscle: MAGED1 Pearson-R=0.44 Pval=9.05E-08

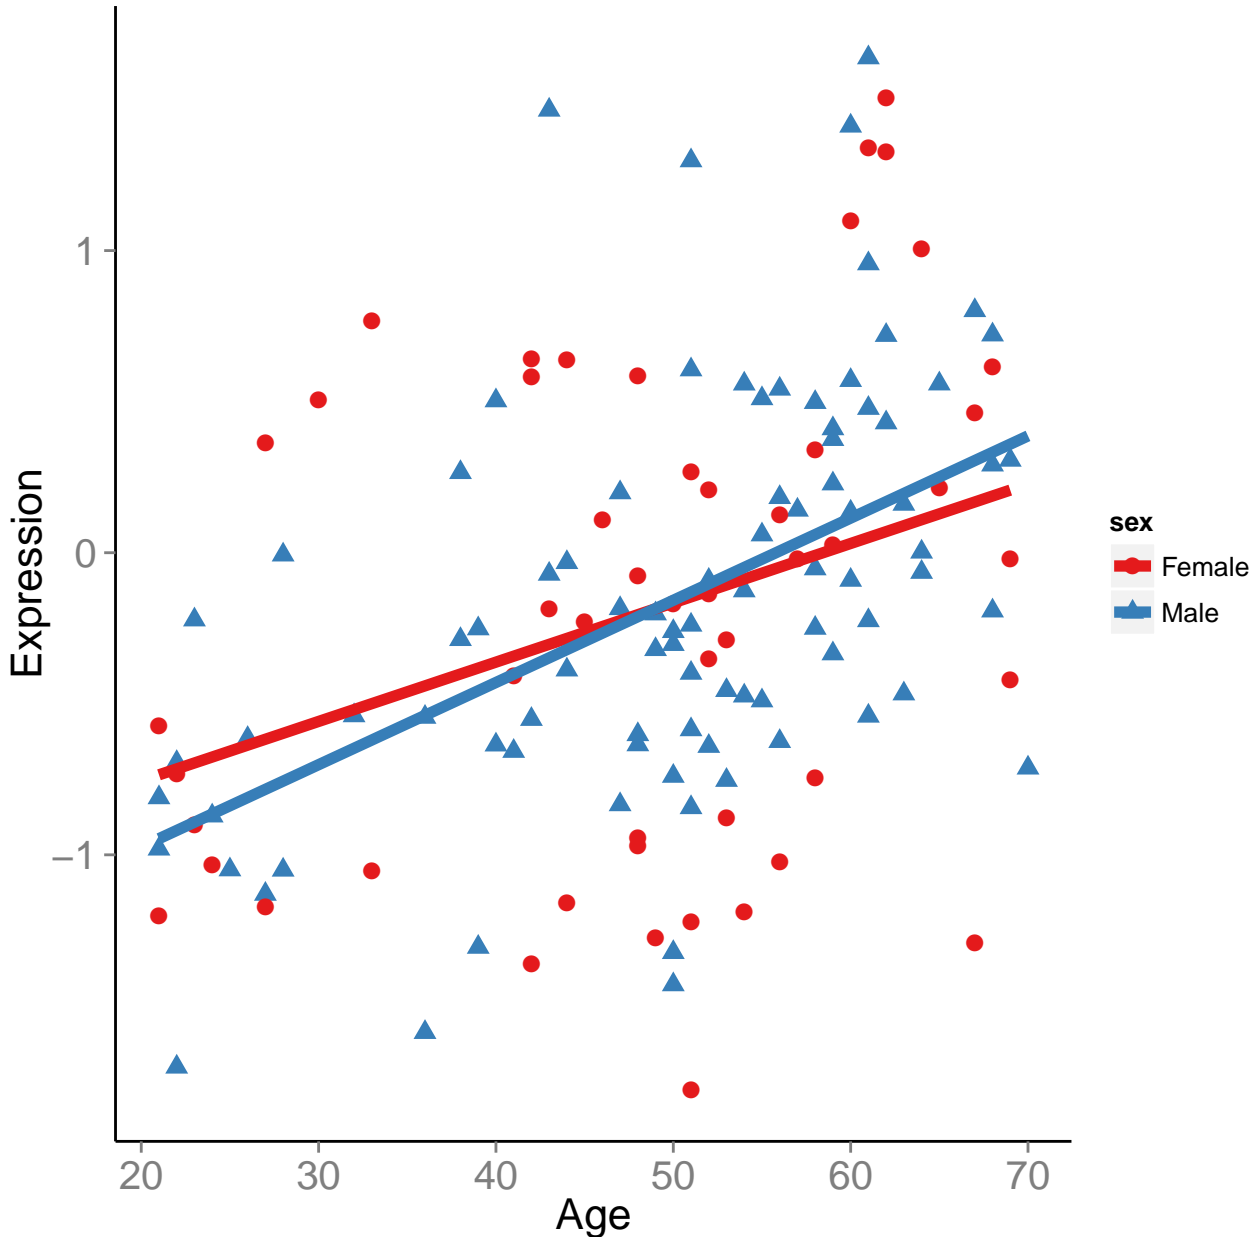

Muscle: RP11-59D5\_\_B.2 Pearson-R=0.44 Pval=9.68E-08

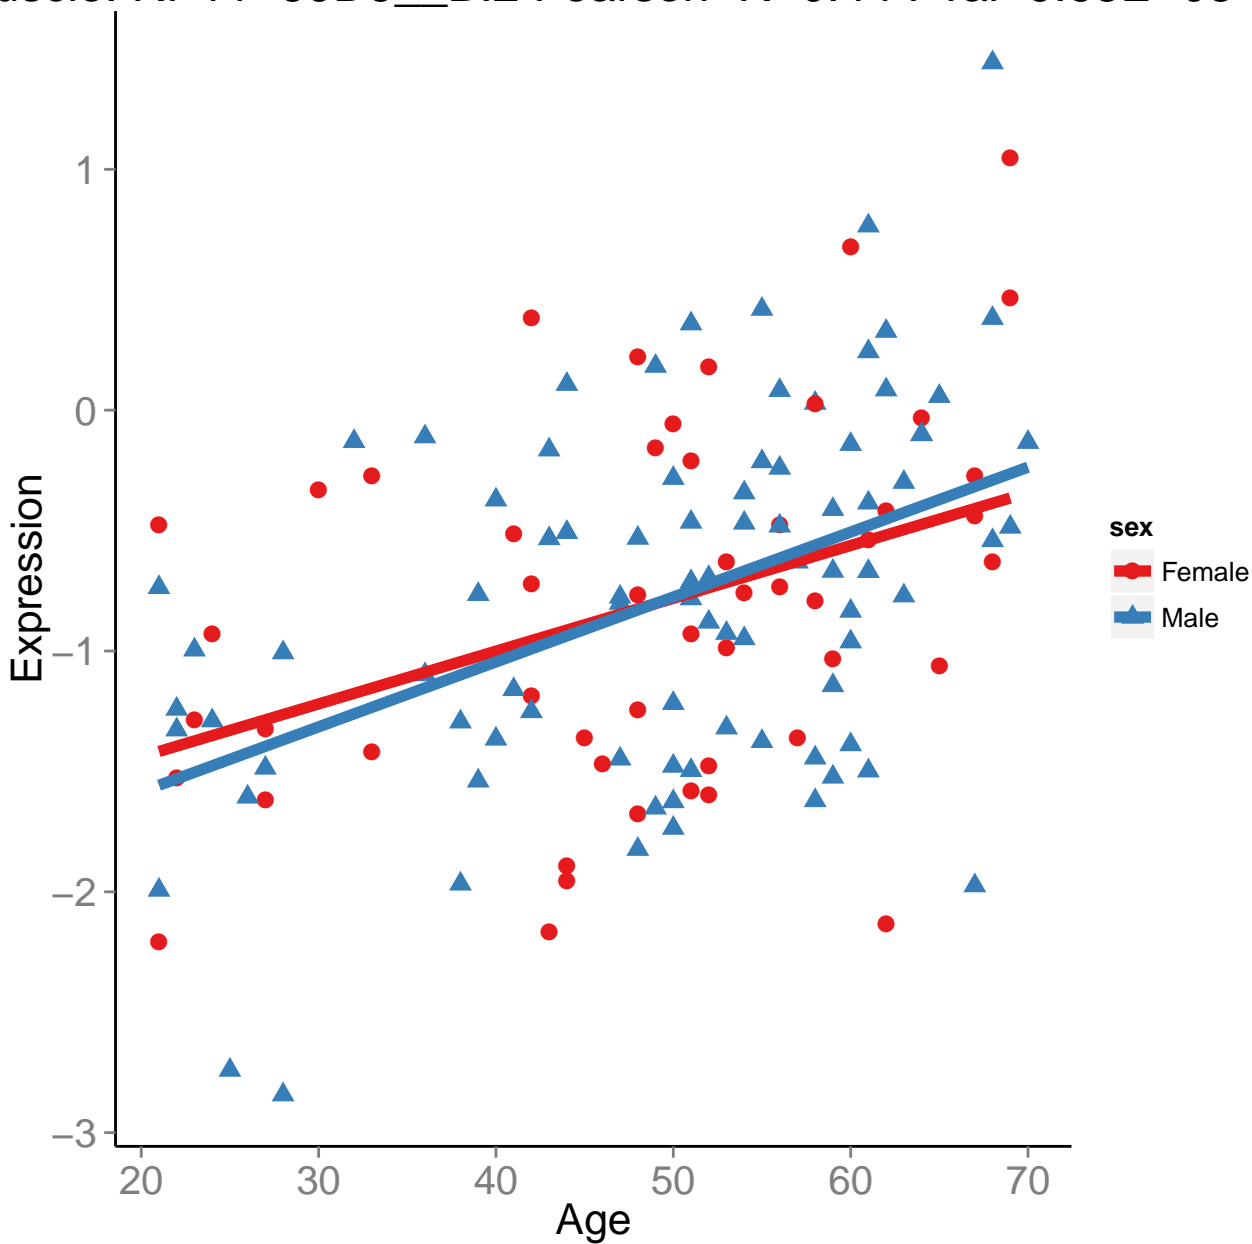

Muscle: CLK4 Pearson-R=0.43 Pval=1.36E-07

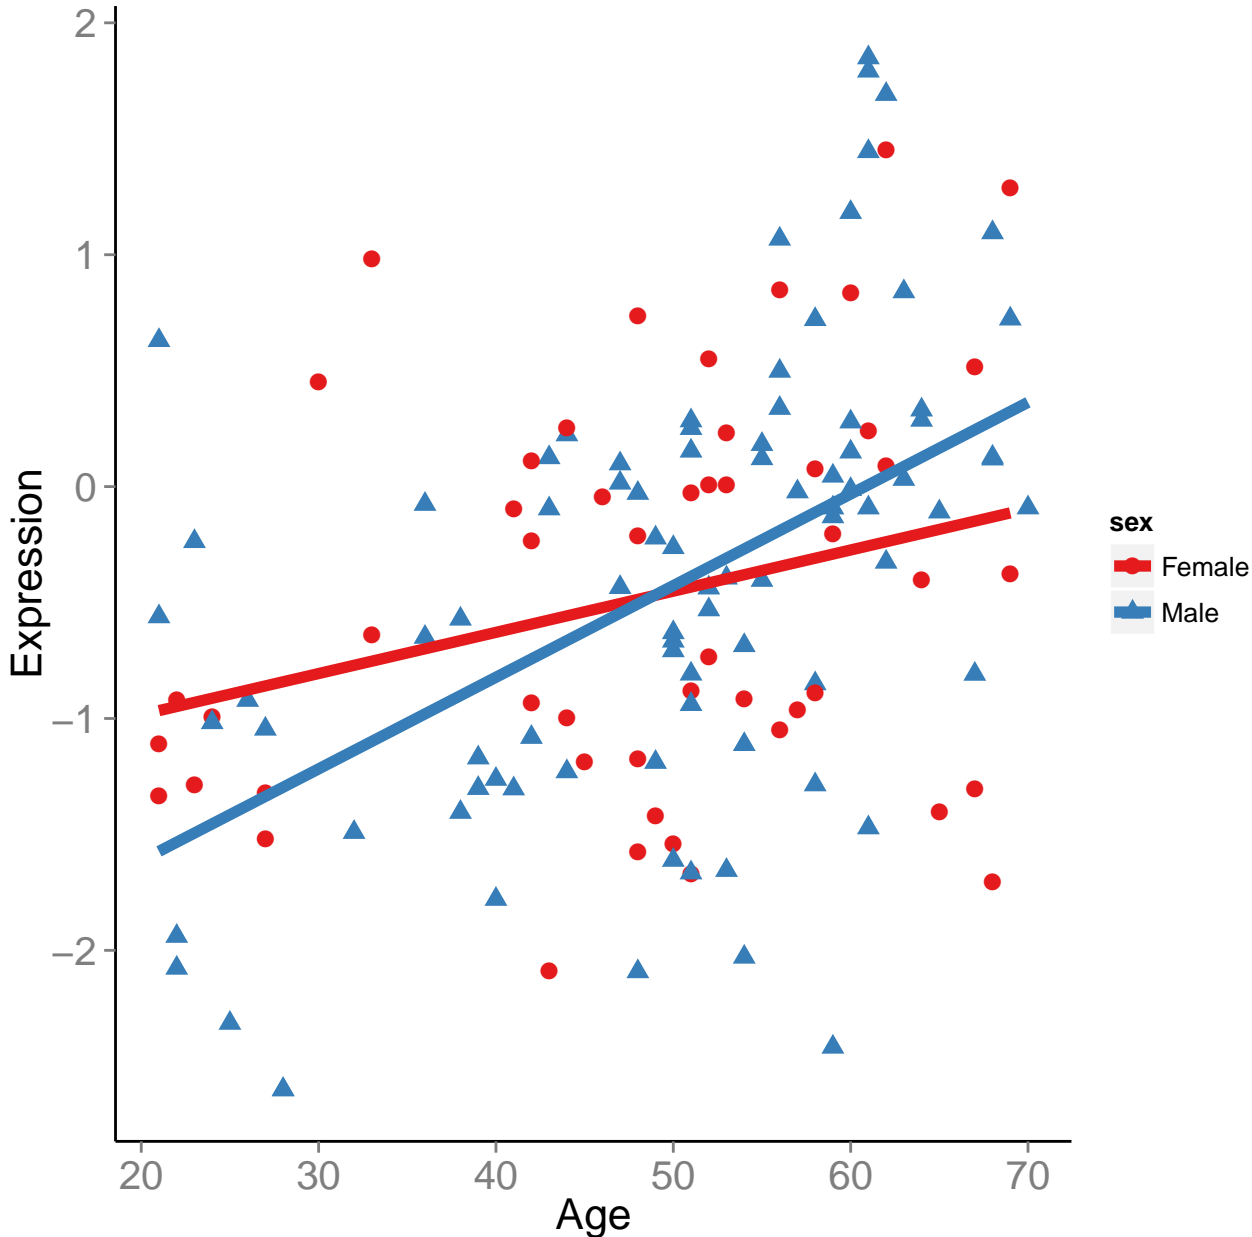

Muscle: EDA2R Pearson-R=0.43 Pval=1.25E-07

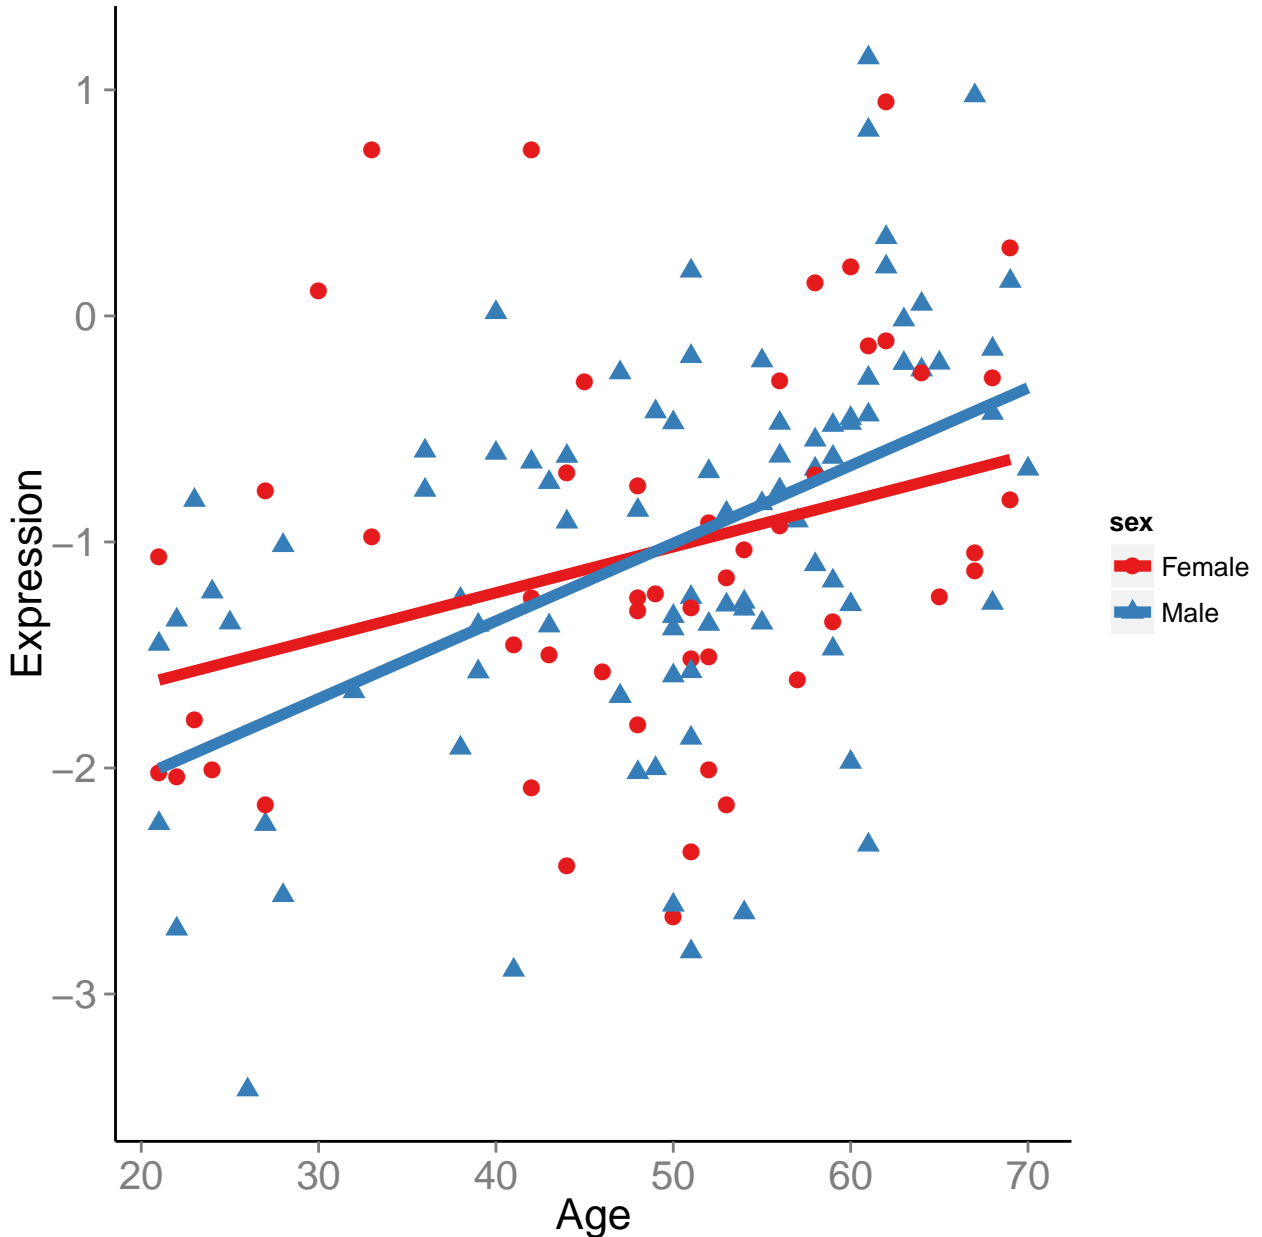



Muscle: ZNF428 Pearson-R=0.43 Pval=1.43E-07

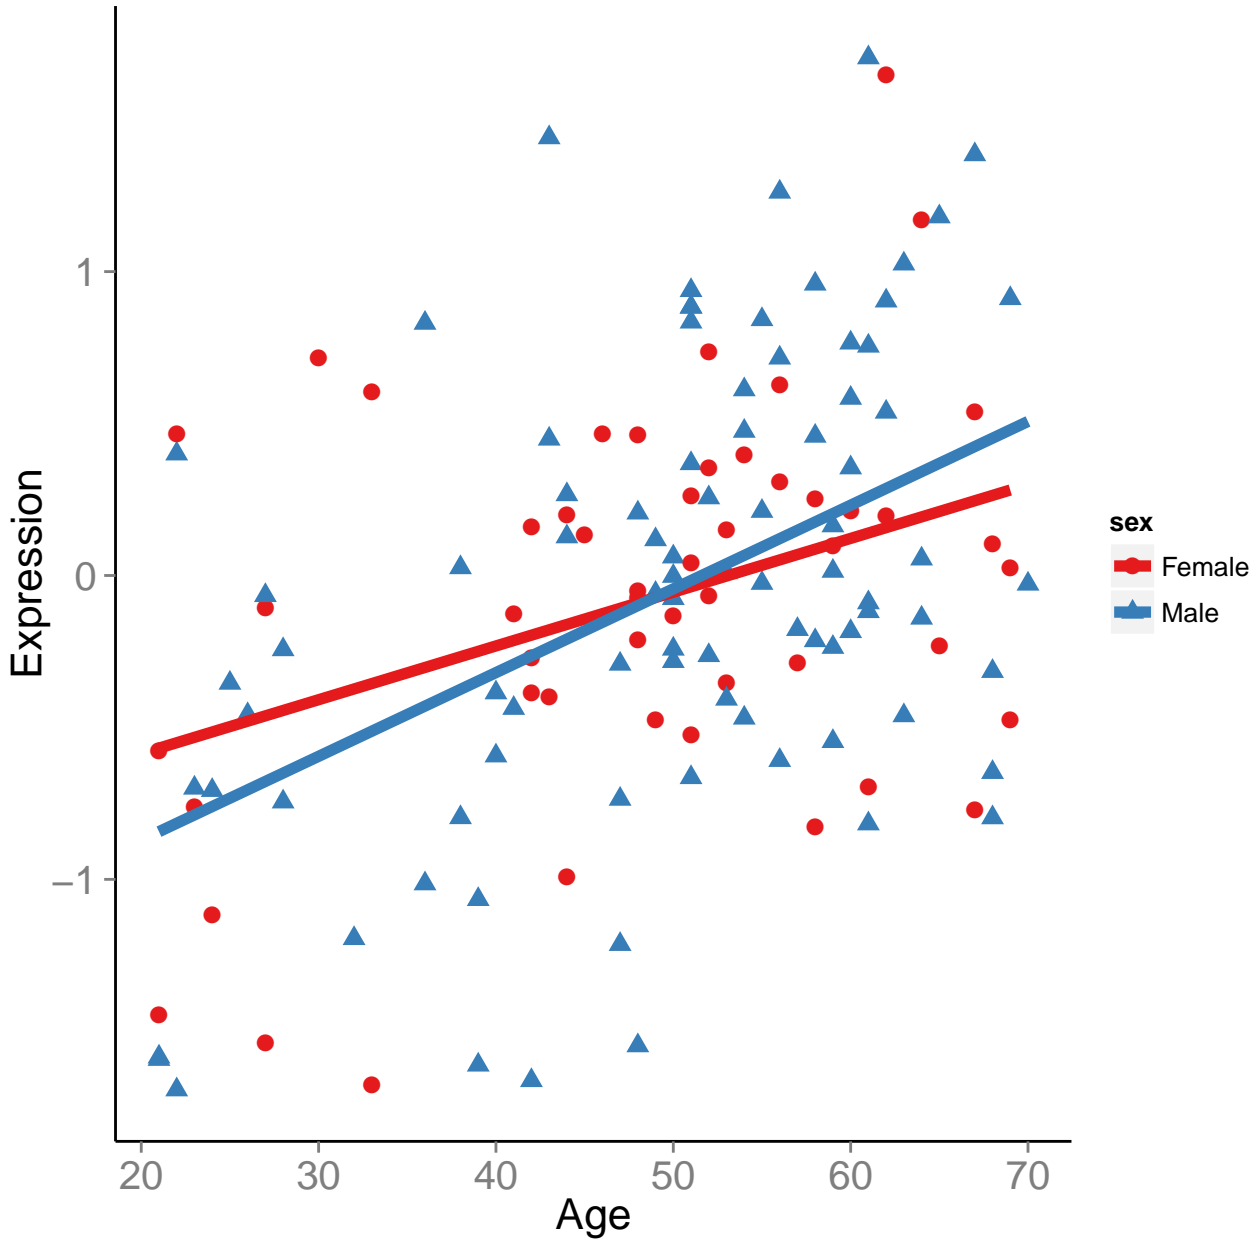

Muscle: SRRM2 Pearson-R=0.43 Pval=1.45E-07

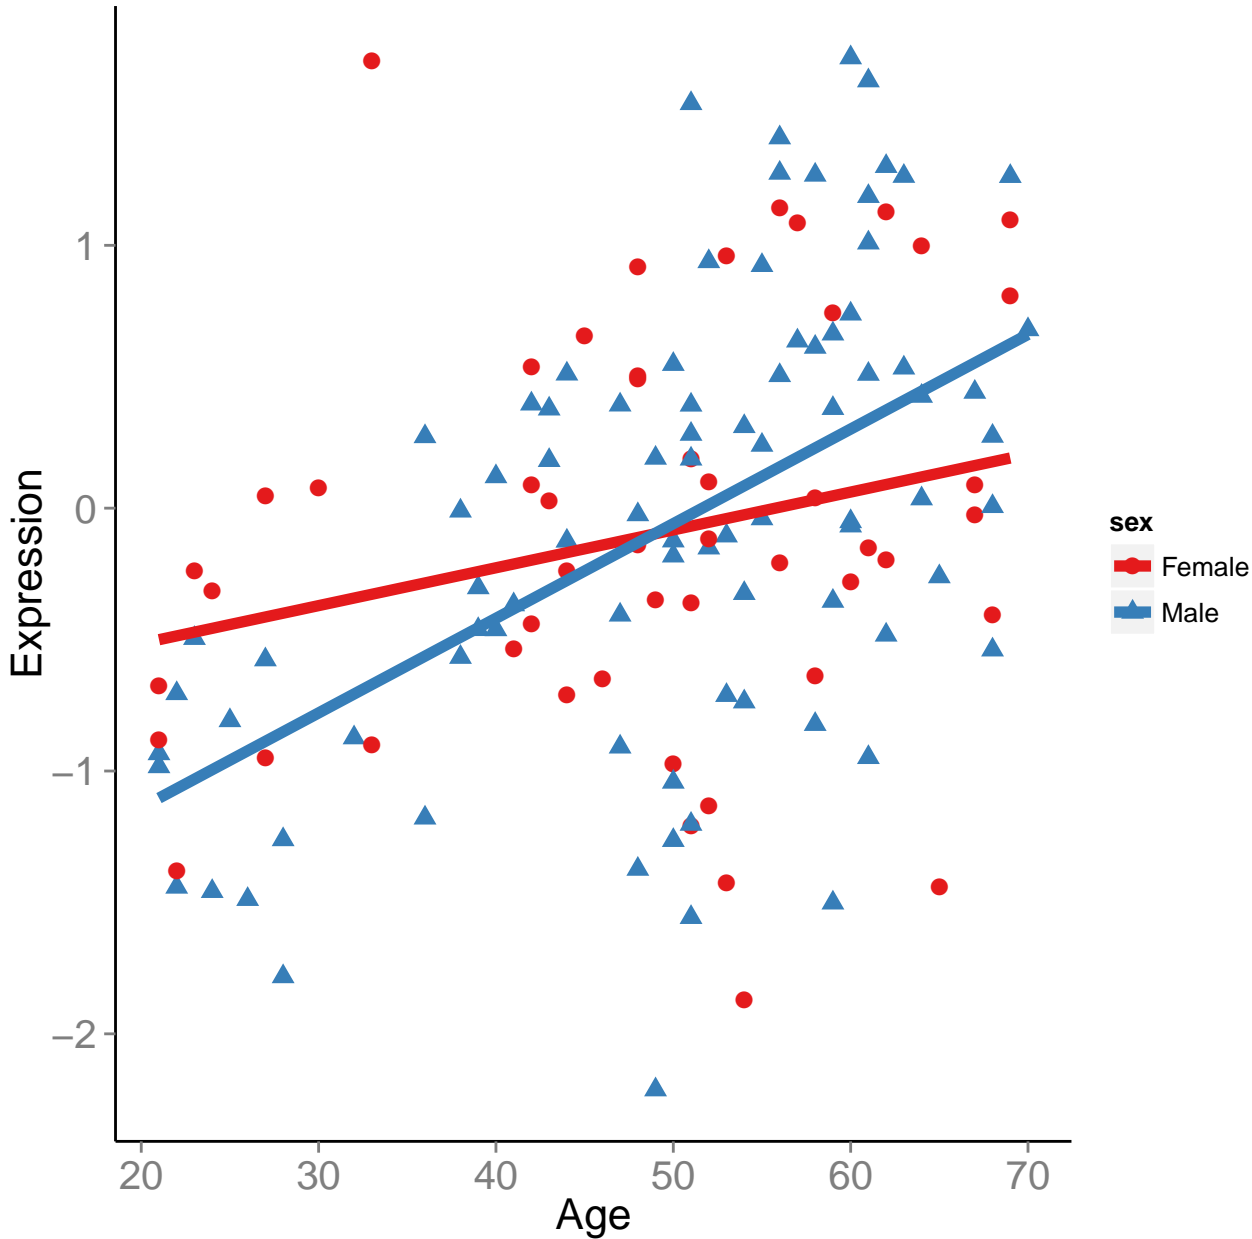

Muscle: BNC2 Pearson-R=0.43 Pval=1.30E-07

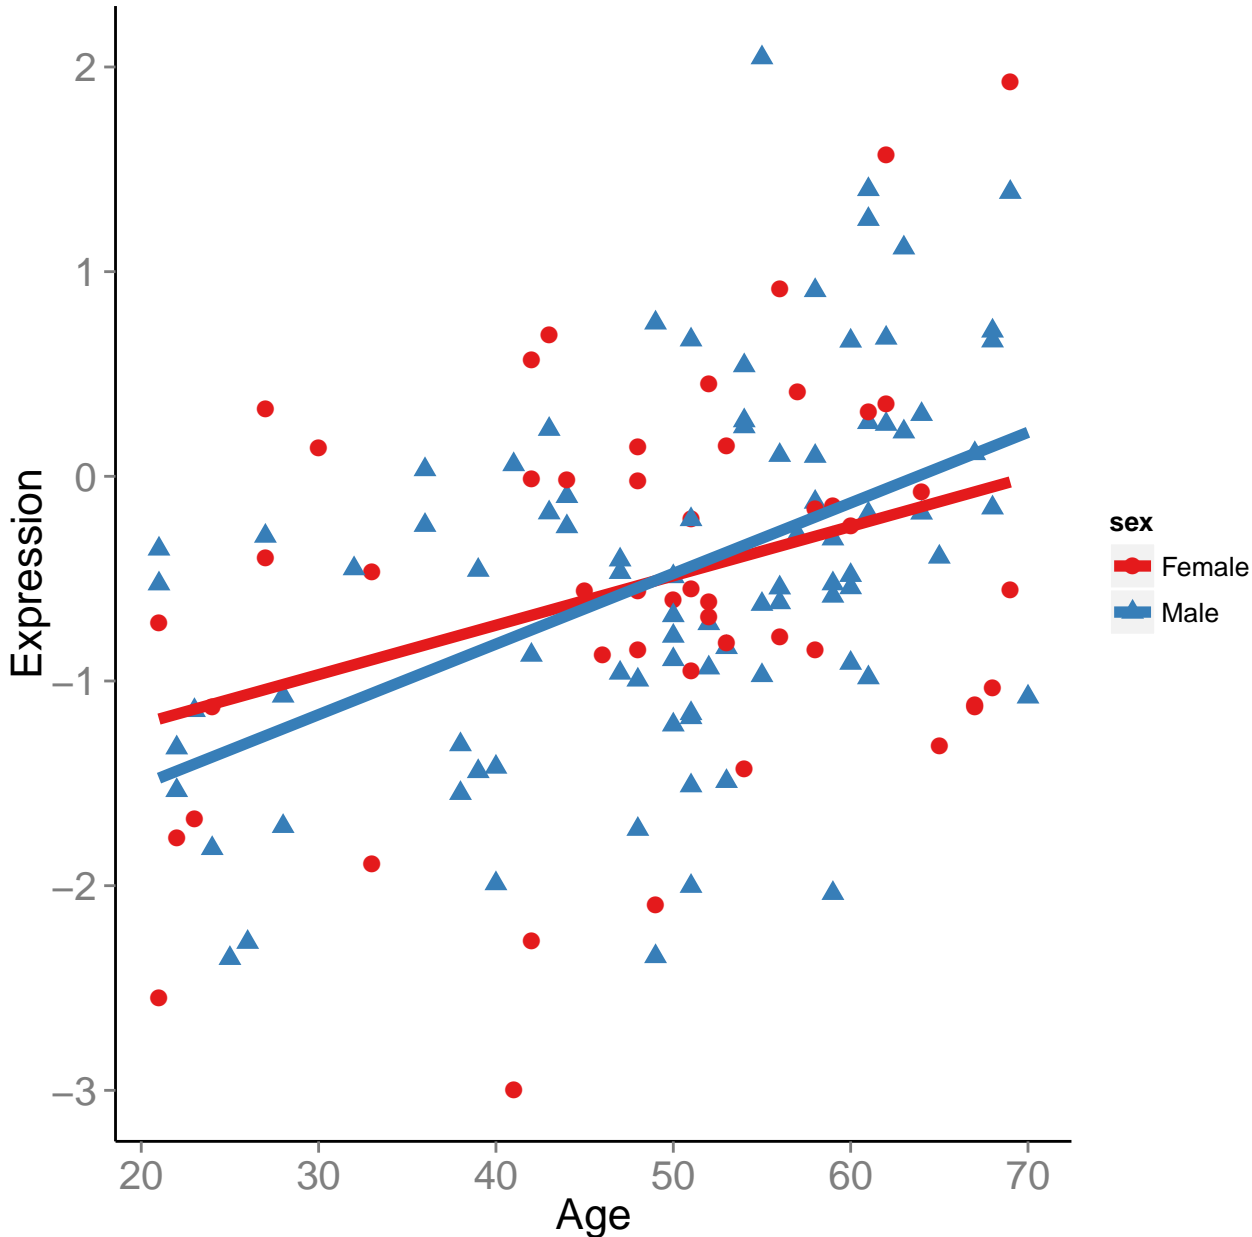

Muscle: NFKBIB Pearson-R=-0.43 Pval=1.28E-07

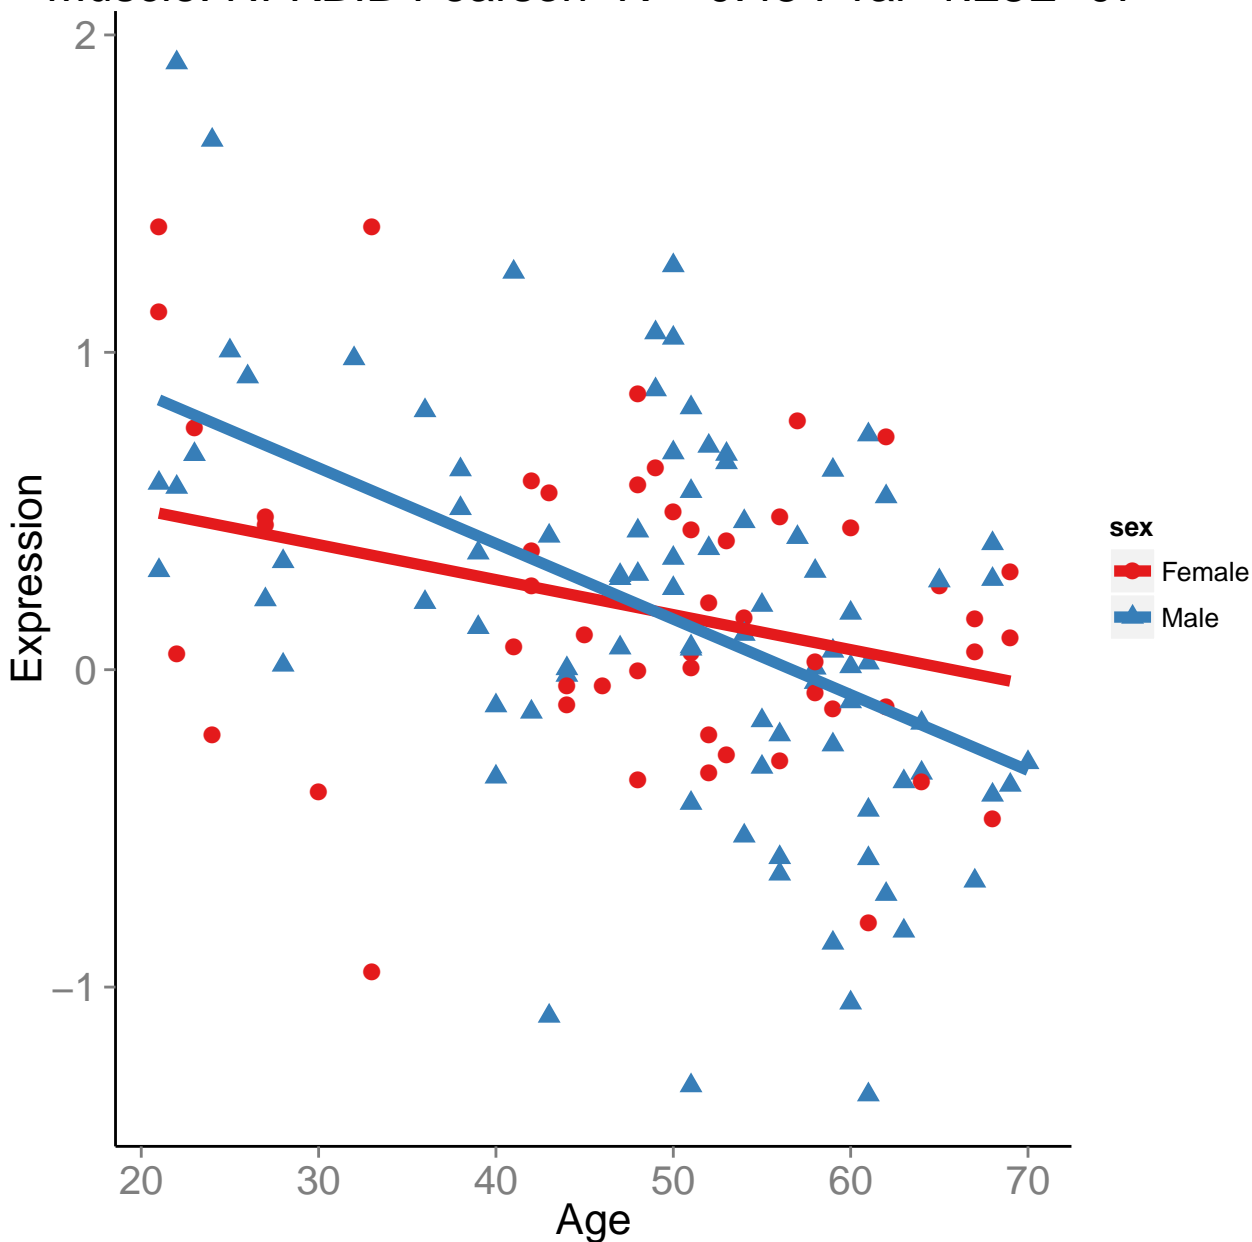

Muscle: FAM198A Pearson-R=0.43 Pval=1.50E-07

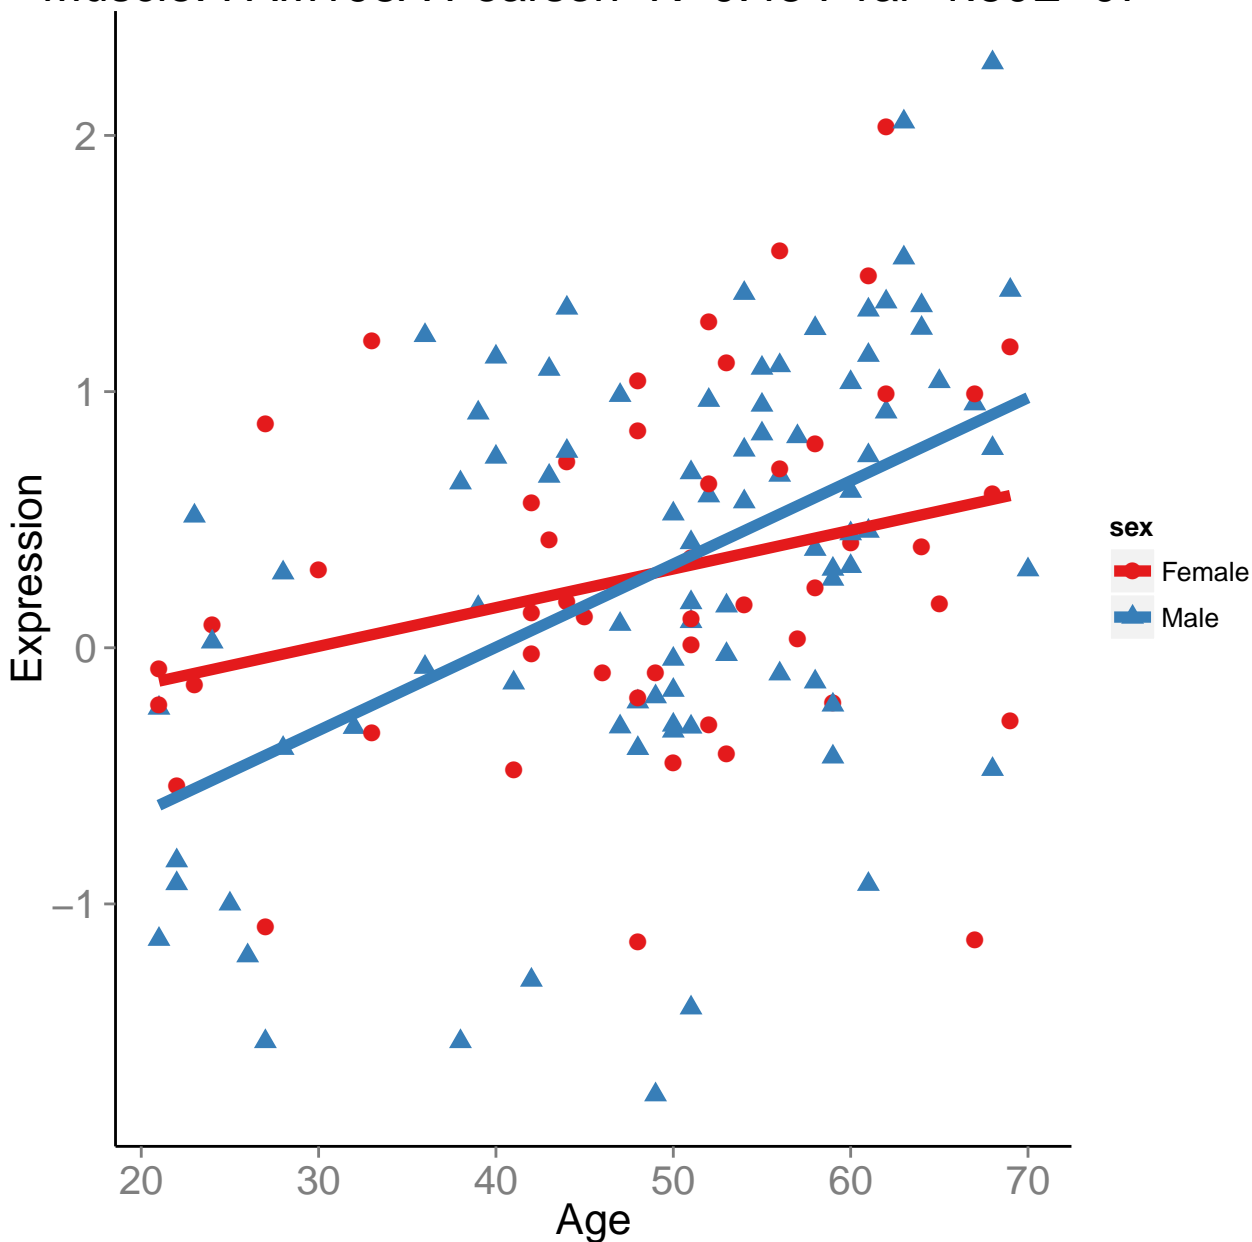

Muscle: ARHGAP36 Pearson-R=0.43 Pval=1.83E-07

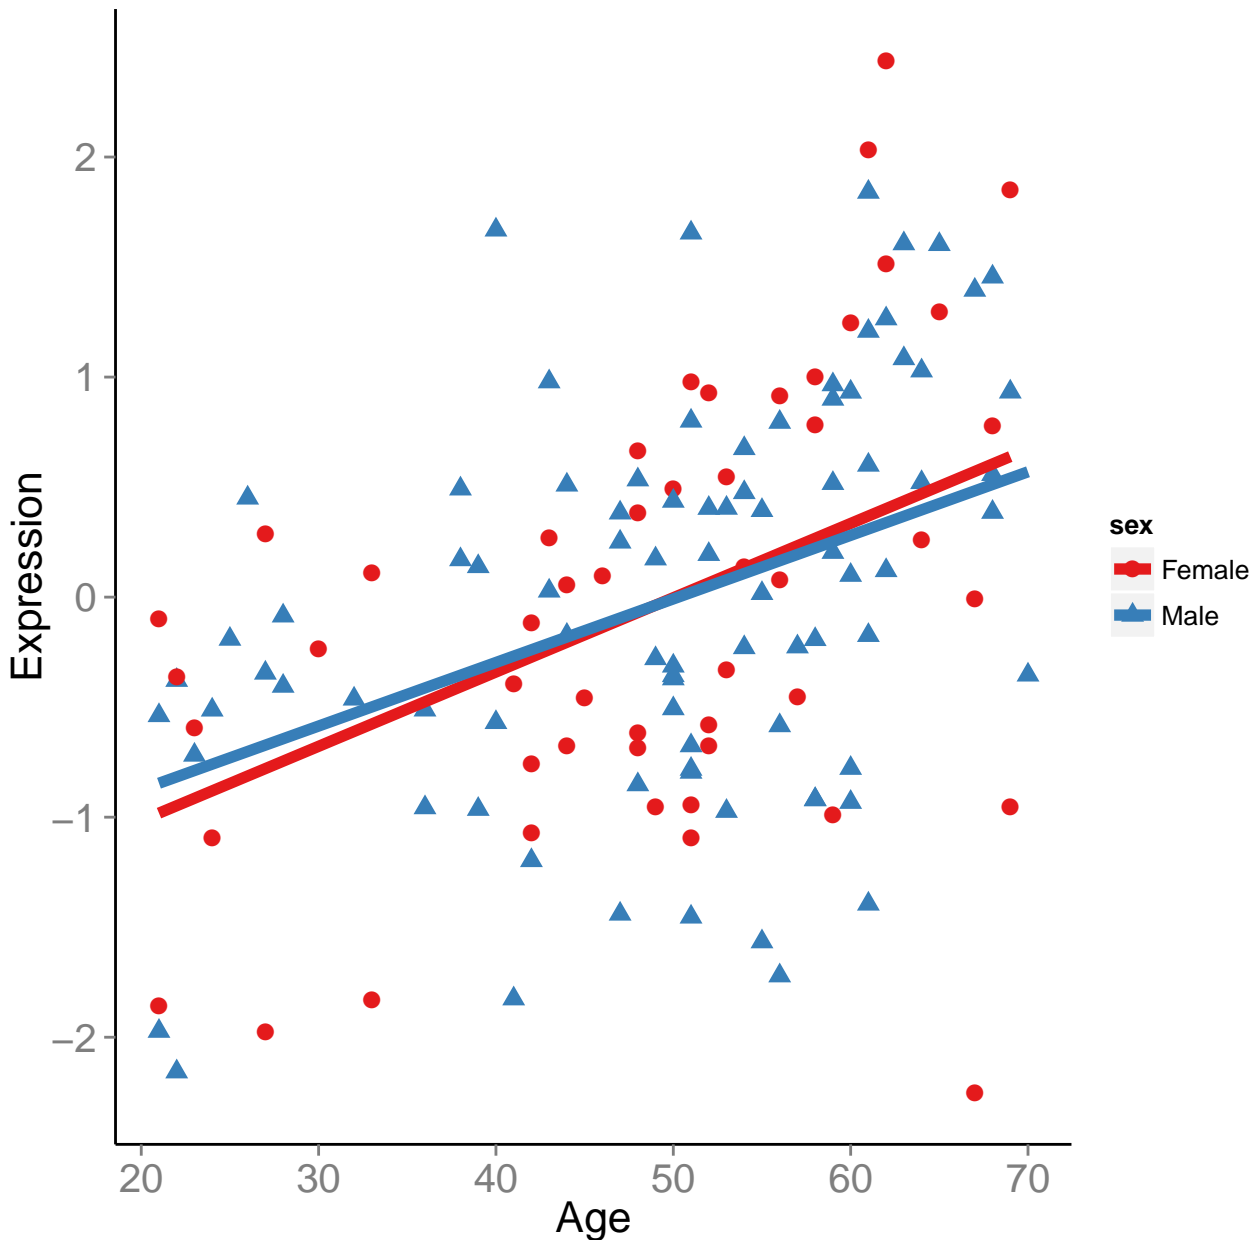

Muscle: AC004562.1 Pearson-R=0.43 Pval=1.71E-07

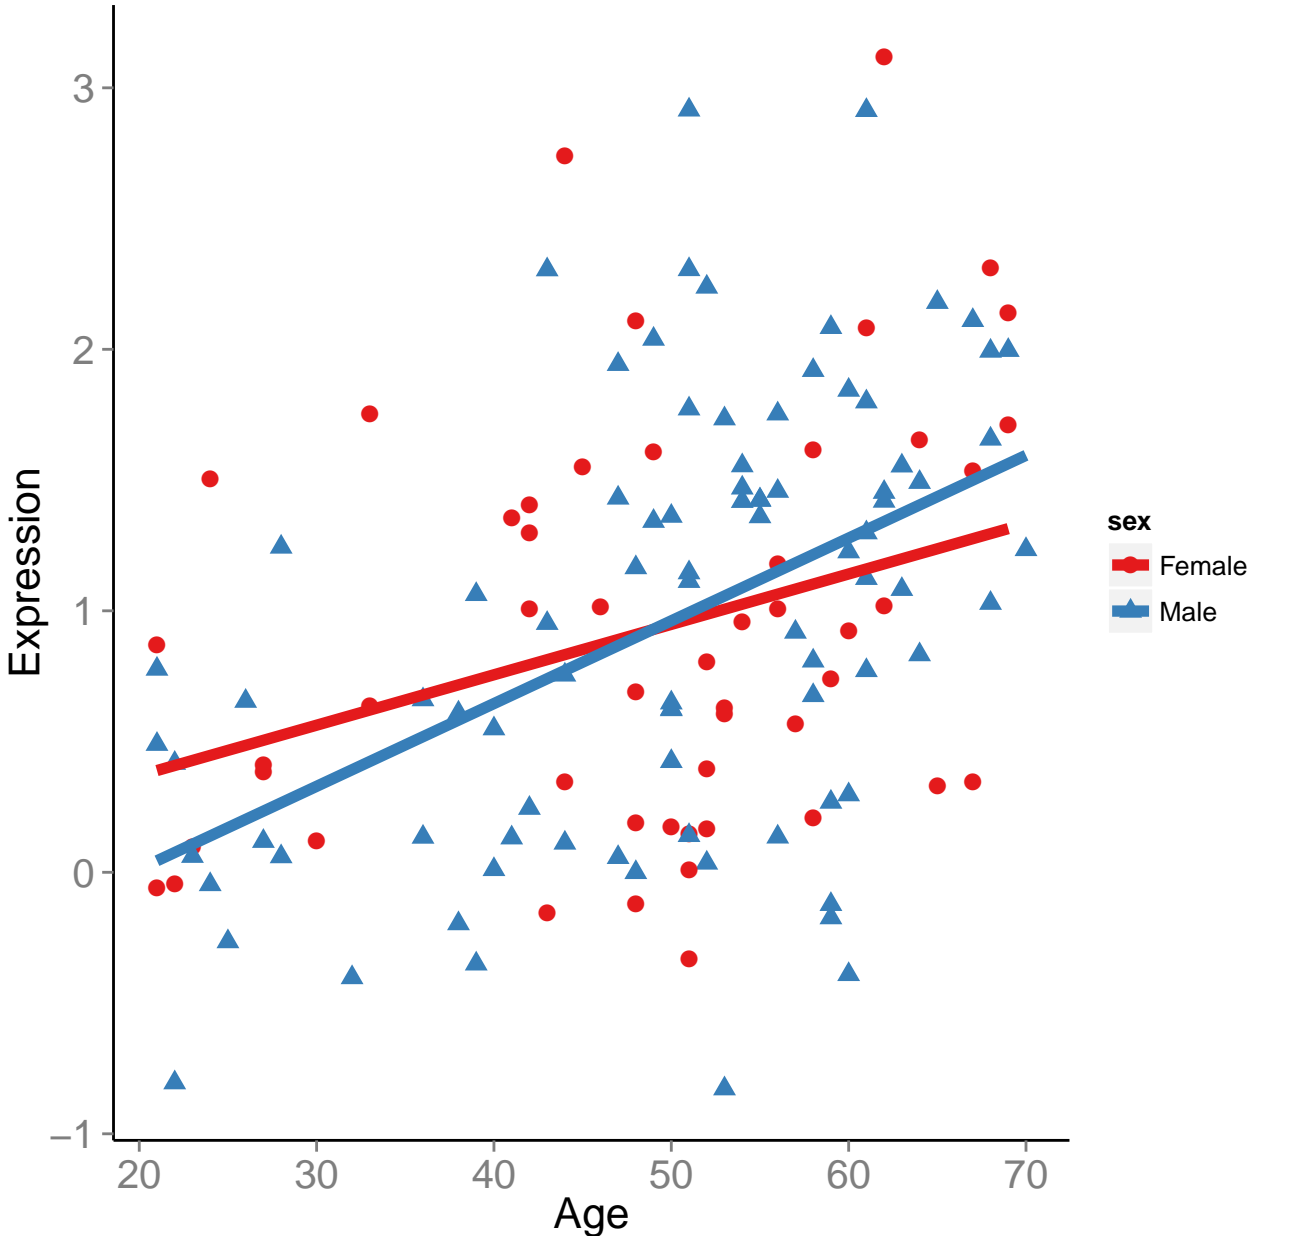

Muscle: AC009475.2 Pearson-R=0.43 Pval=1.77E-07

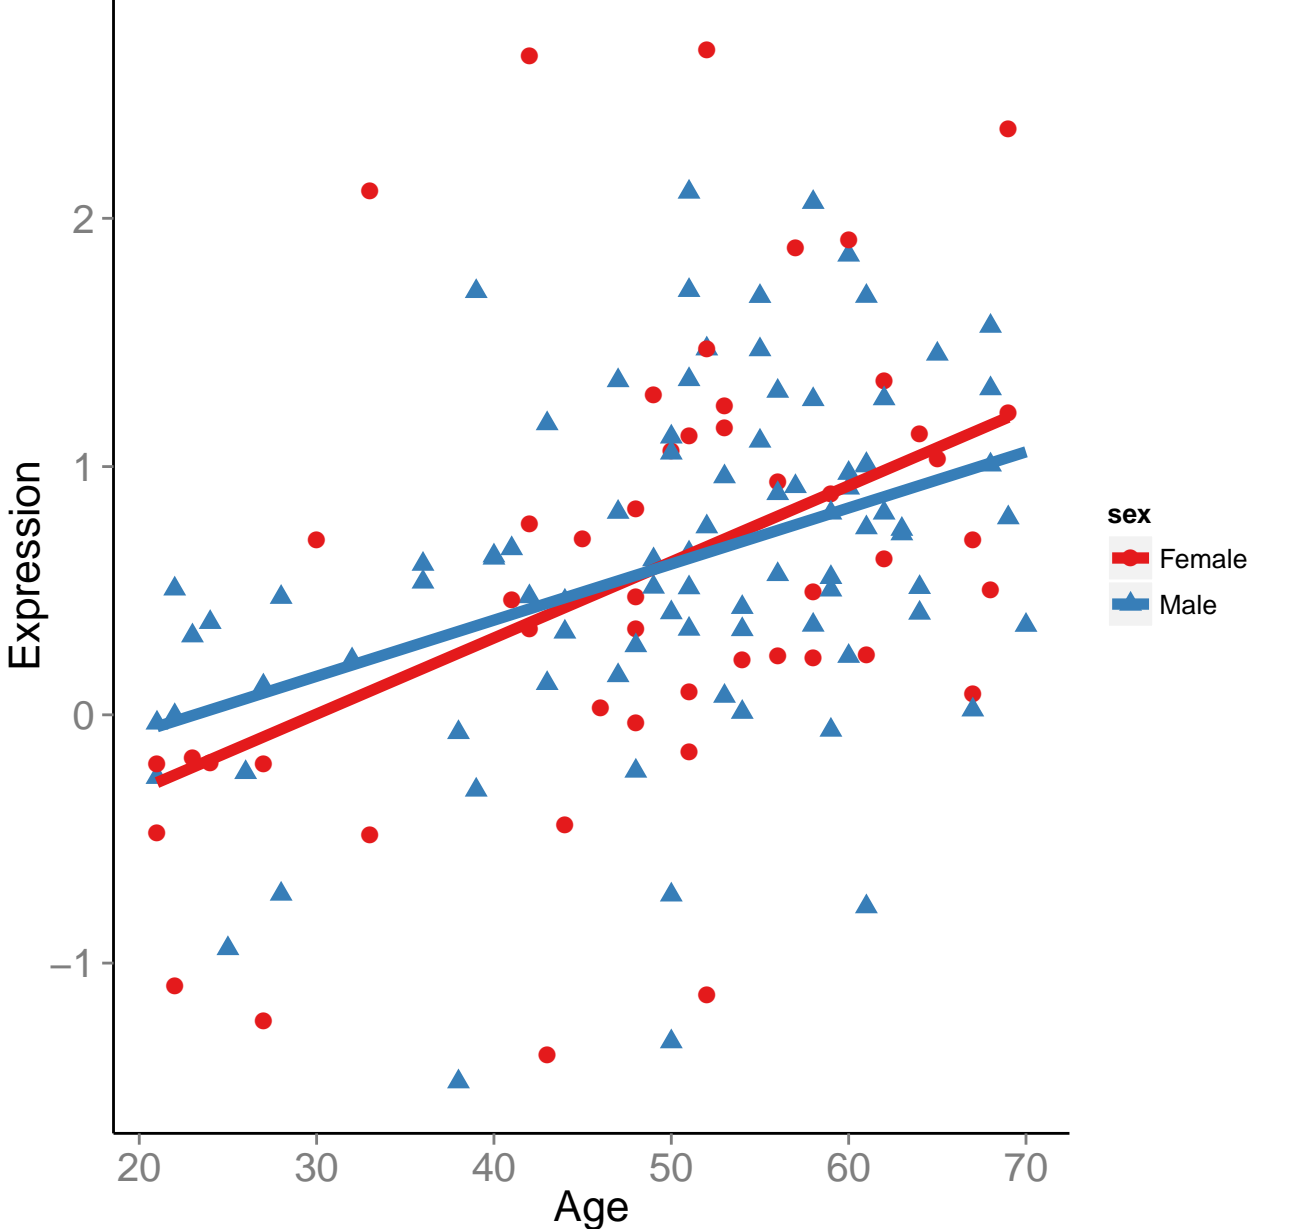



Muscle: STXBP5 Pearson-R=0.42 Pval=2.40E-07

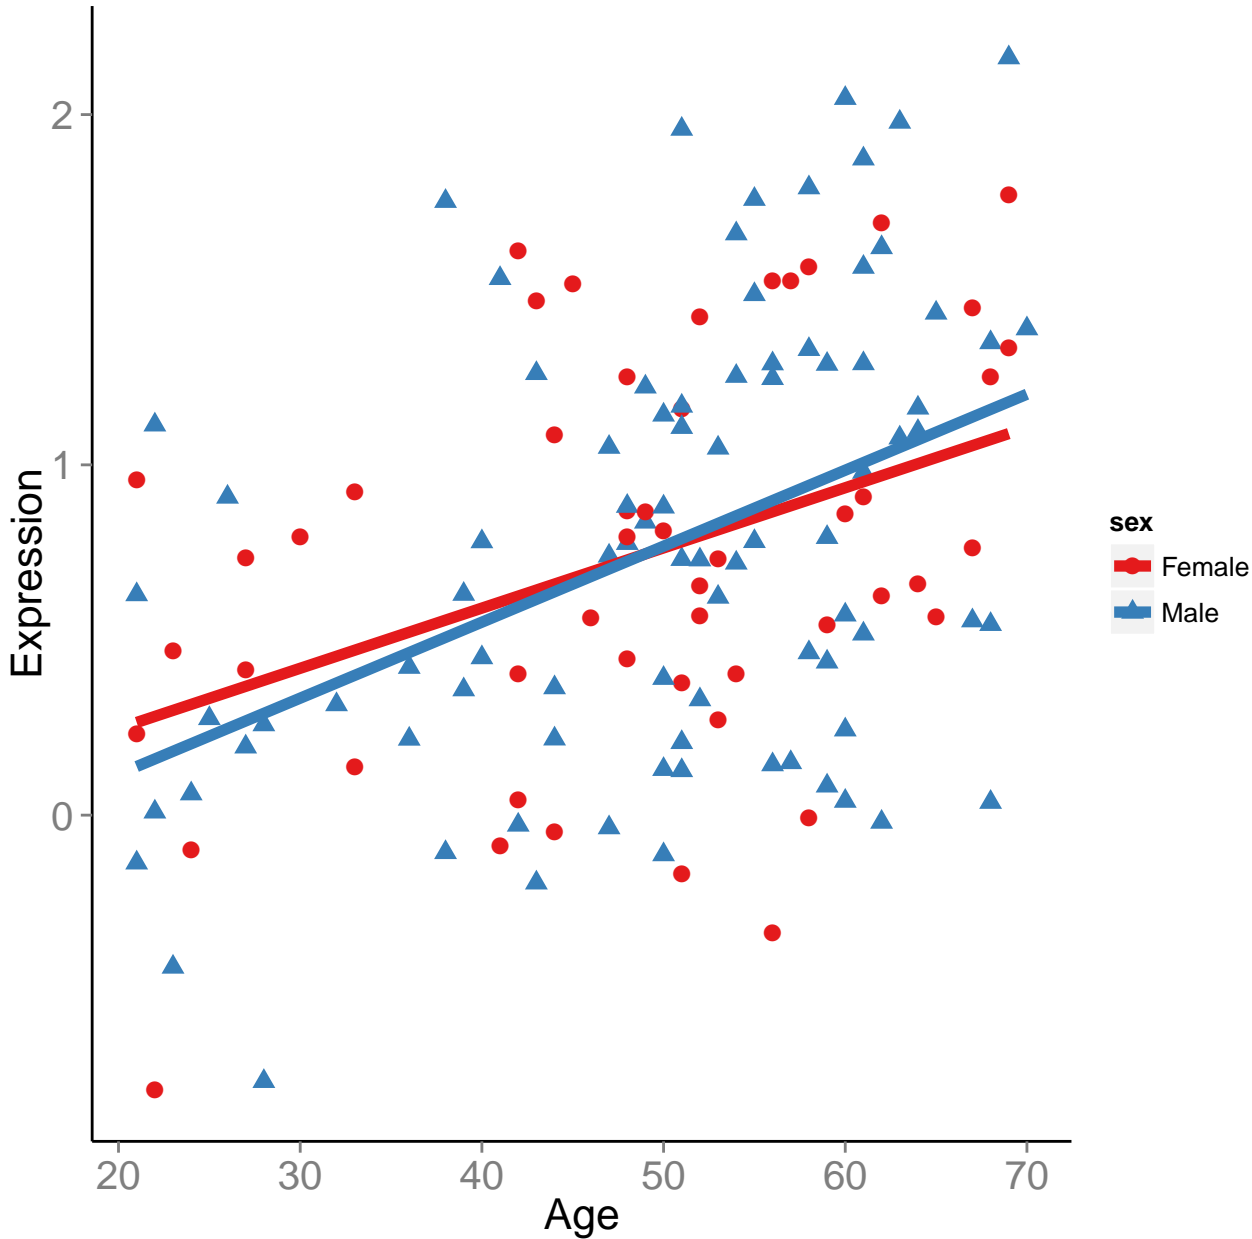

Muscle: IKZF2 Pearson-R=0.42 Pval=2.36E-07

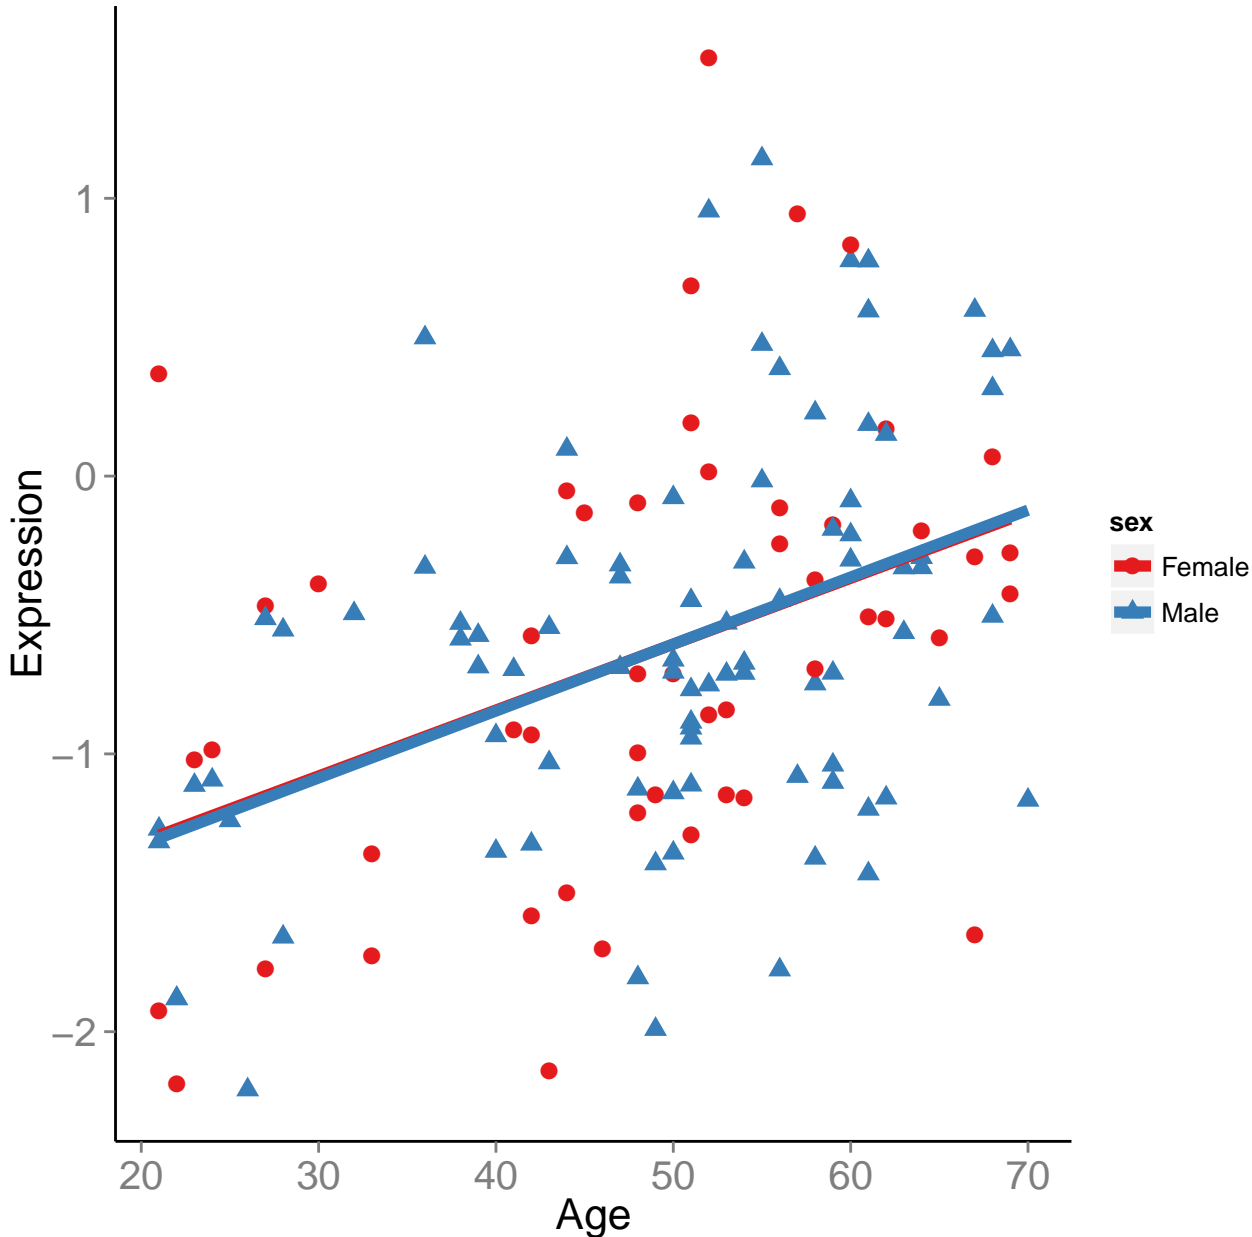

Muscle: CBX5 Pearson-R=0.42 Pval=2.04E-07

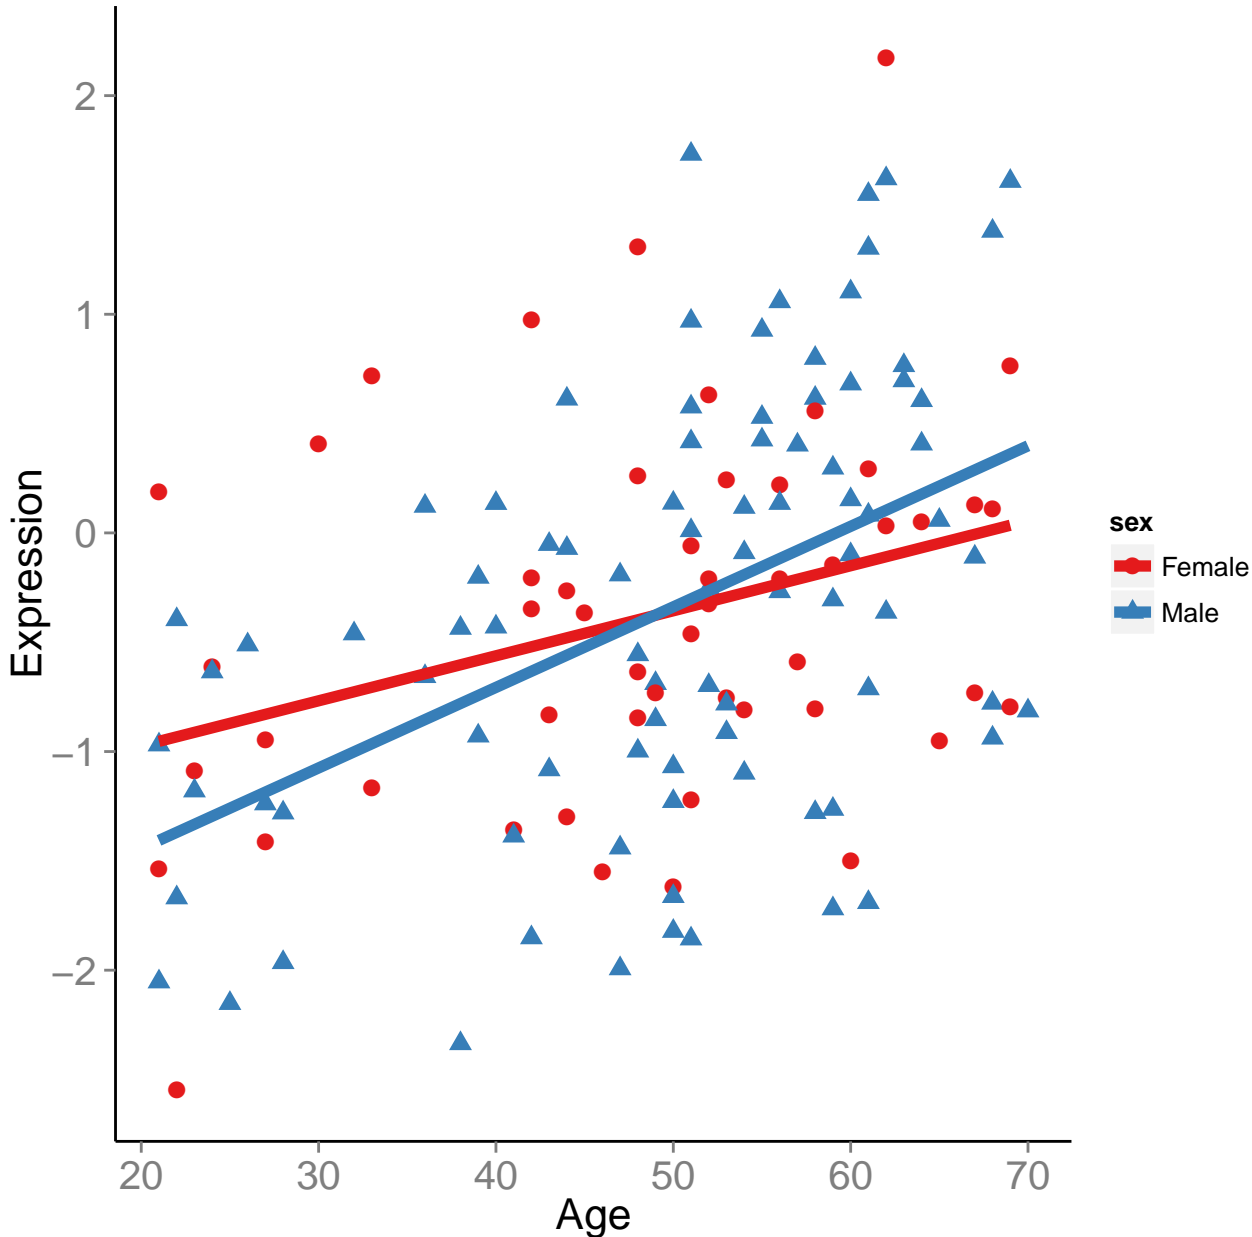

Muscle: PLCE1 Pearson-R=0.42 Pval=2.08E-07

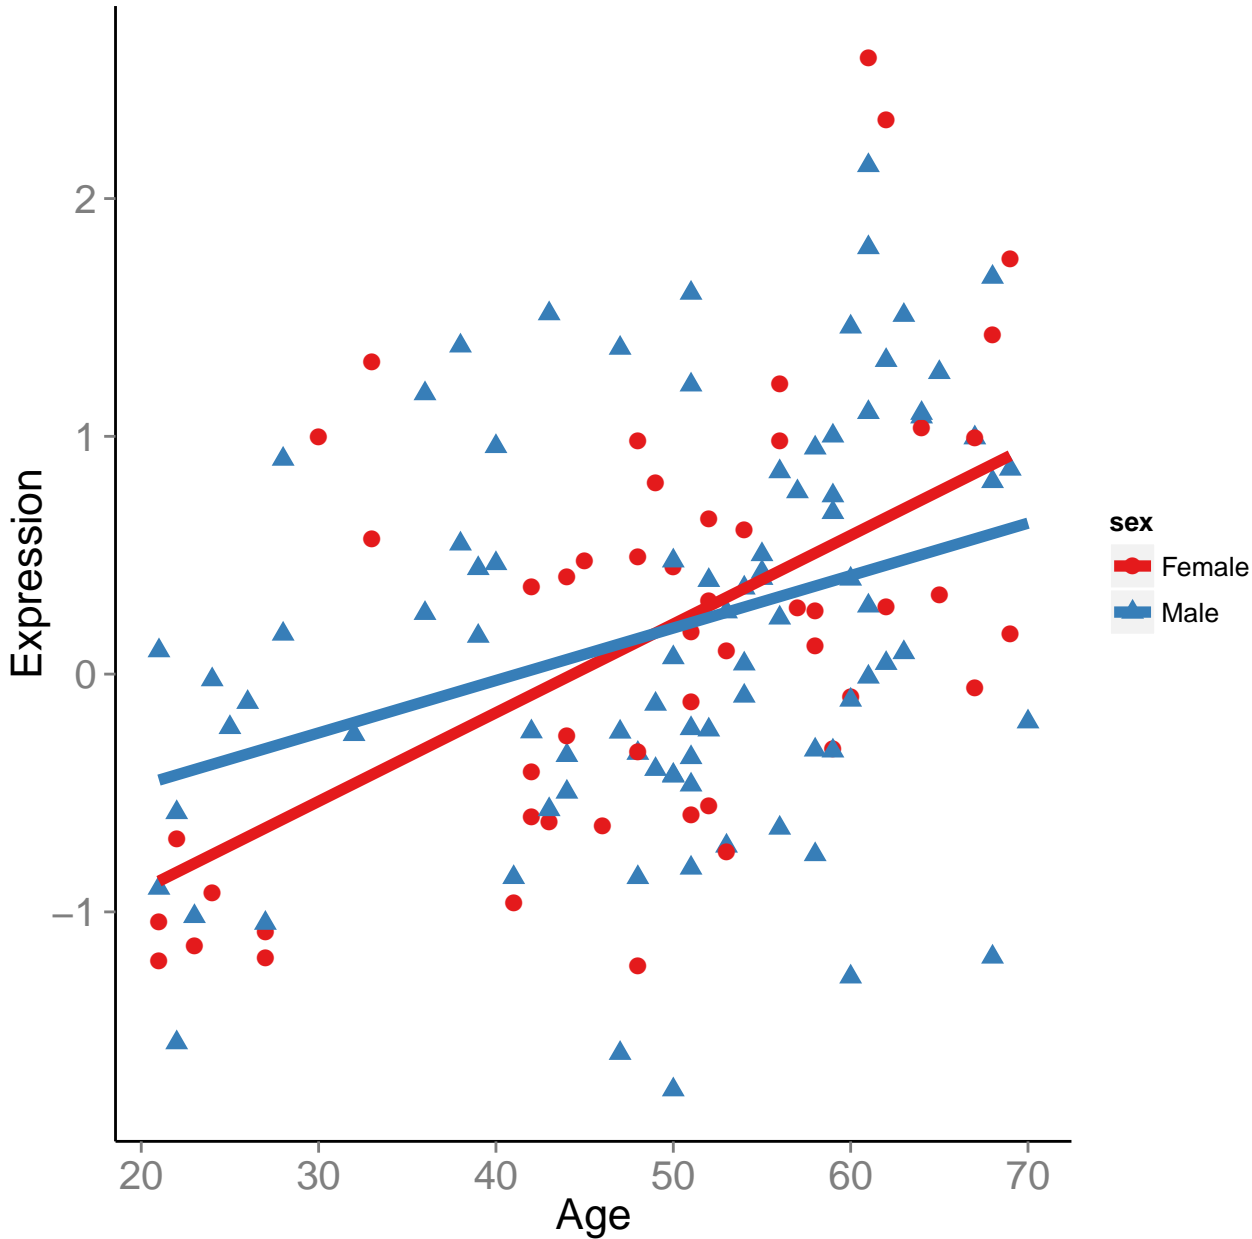

Muscle: CERS6 Pearson-R=0.42 Pval=2.41E-07

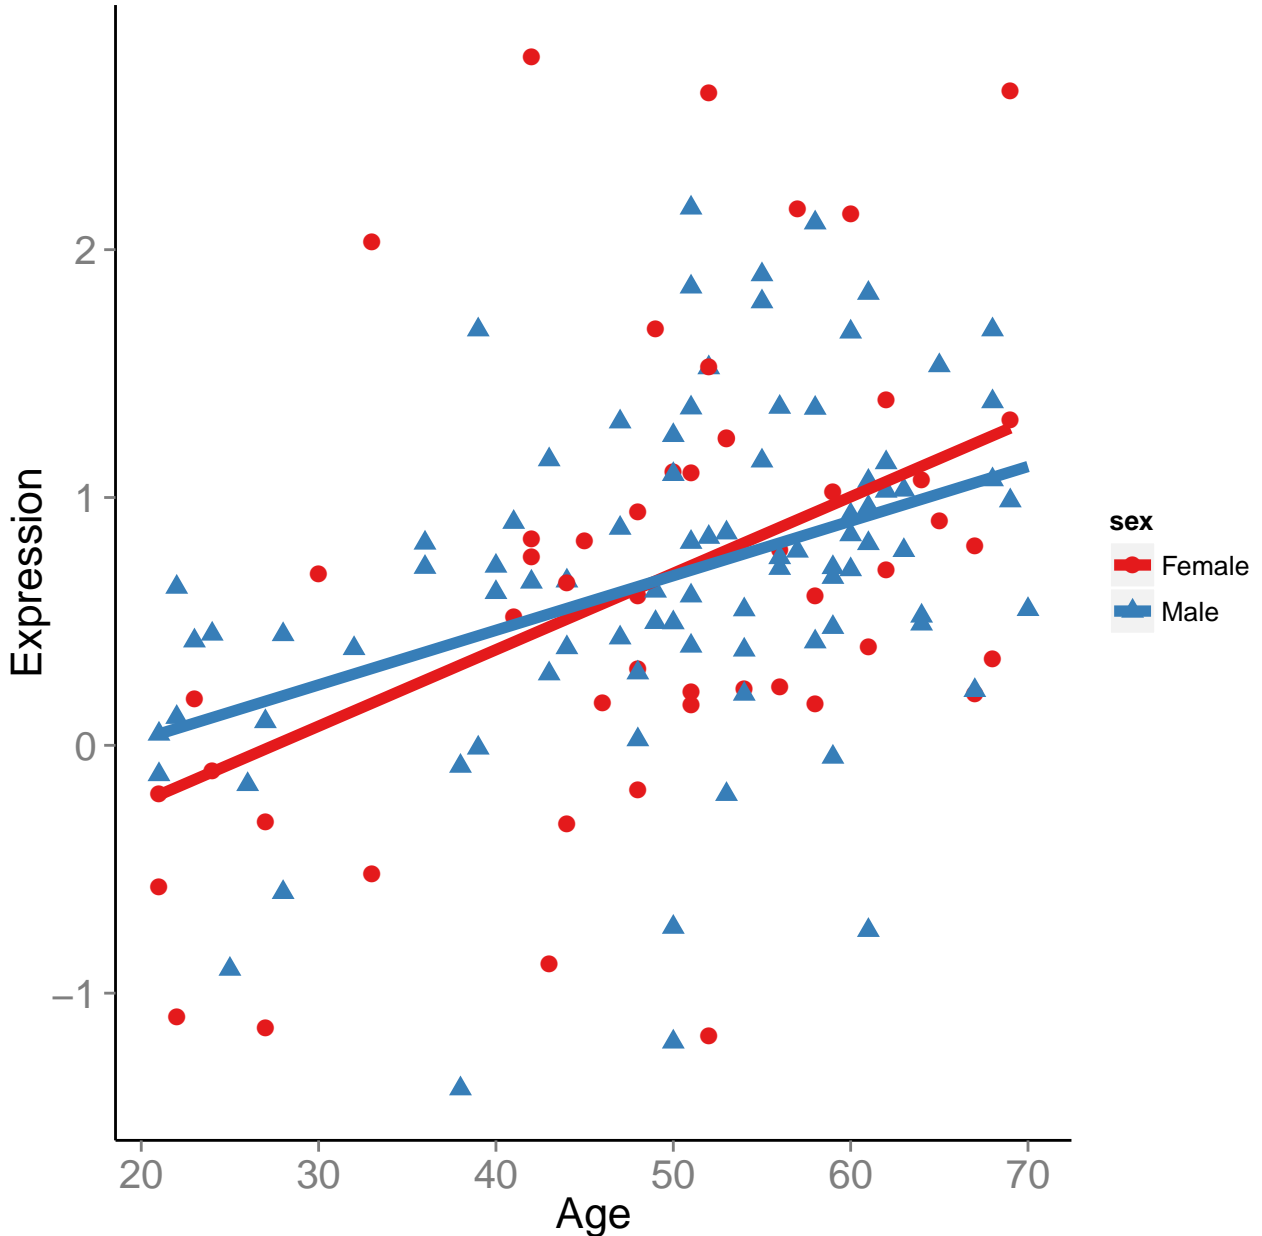

Muscle: NFE2L1 Pearson-R=-0.42 Pval=2.19E-07

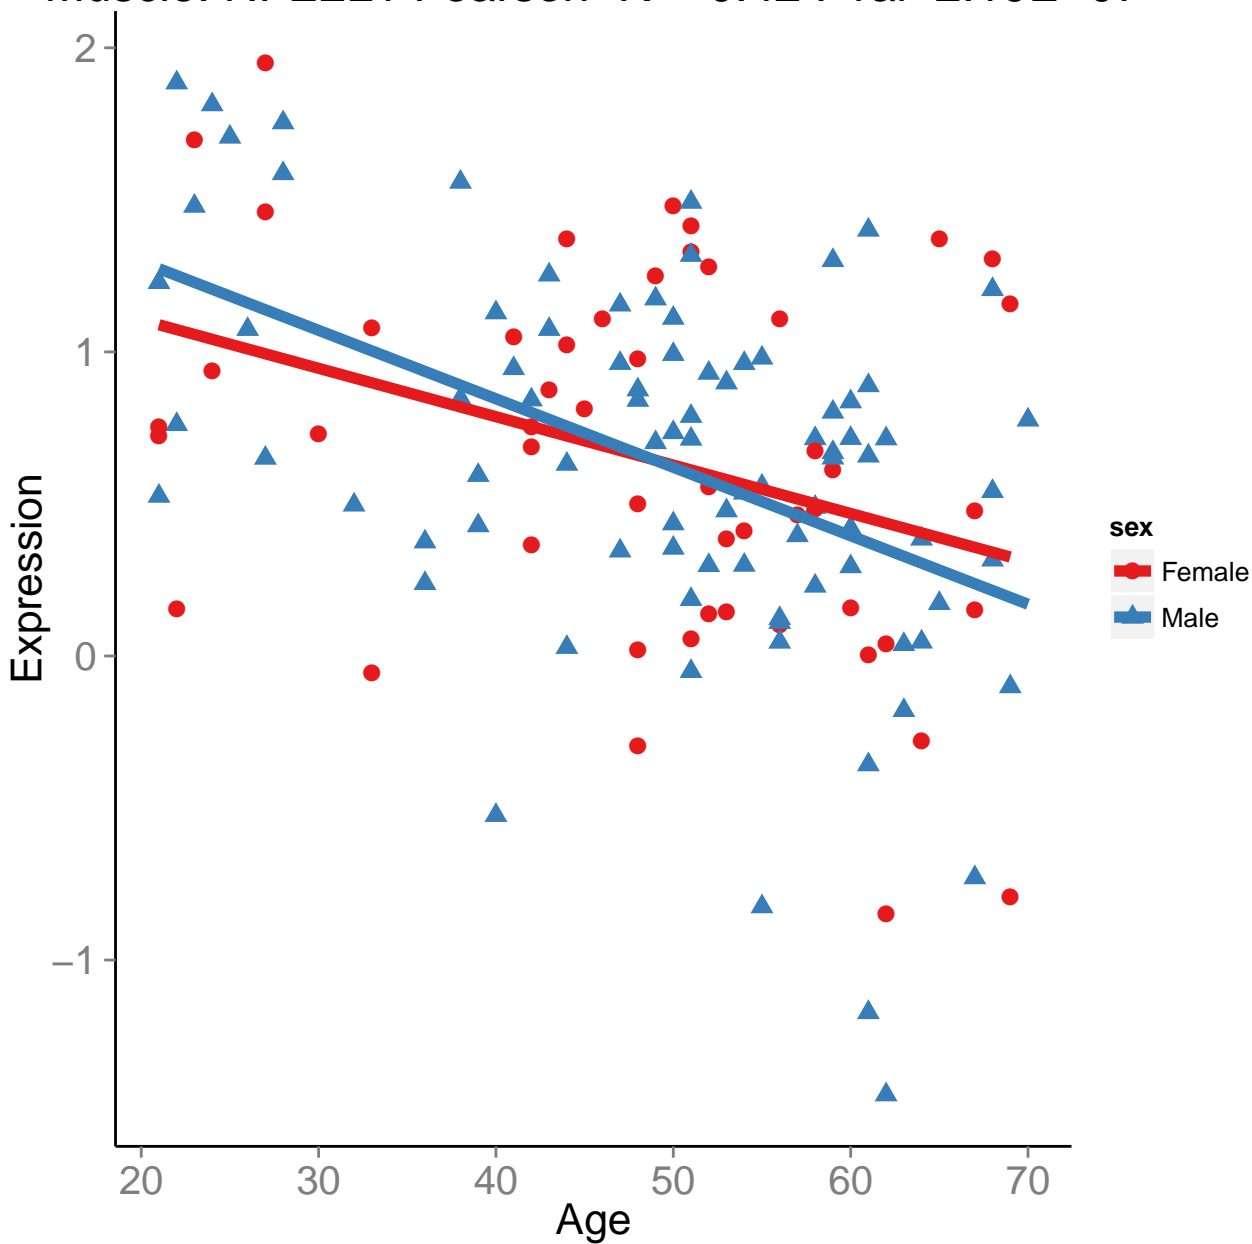

Muscle: EXOG Pearson-R=0.42 Pval=2.26E-07

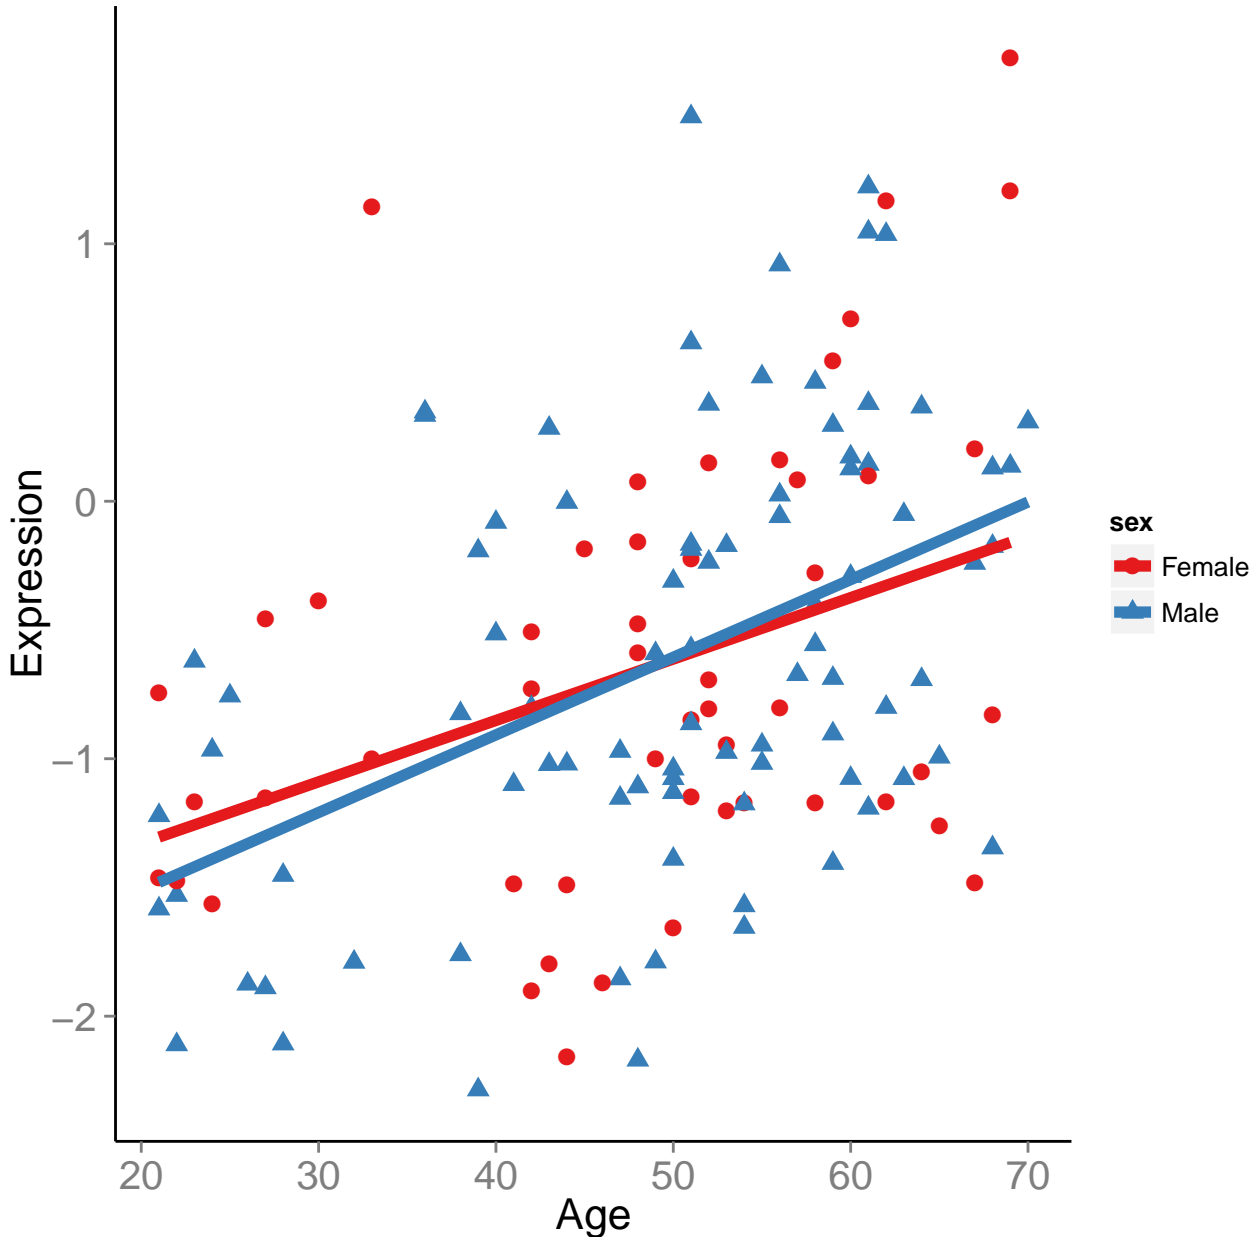

Muscle: CXorf57 Pearson-R=0.42 Pval=3.96E-07

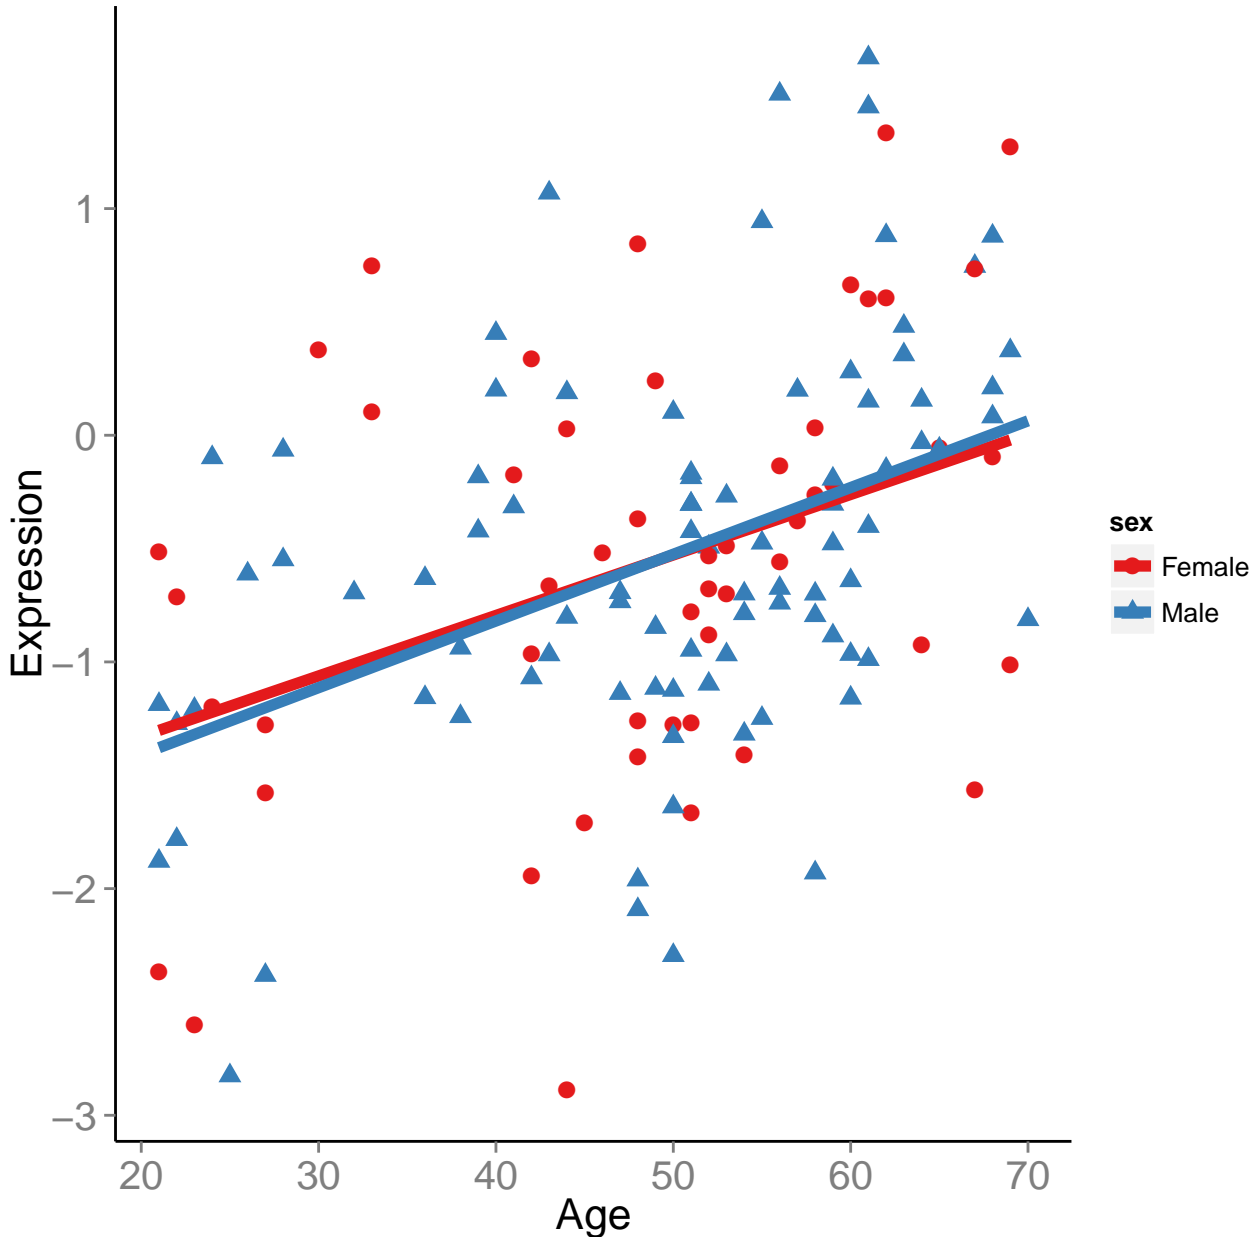



Muscle: POLE Pearson-R=0.42 Pval=3.90E-07

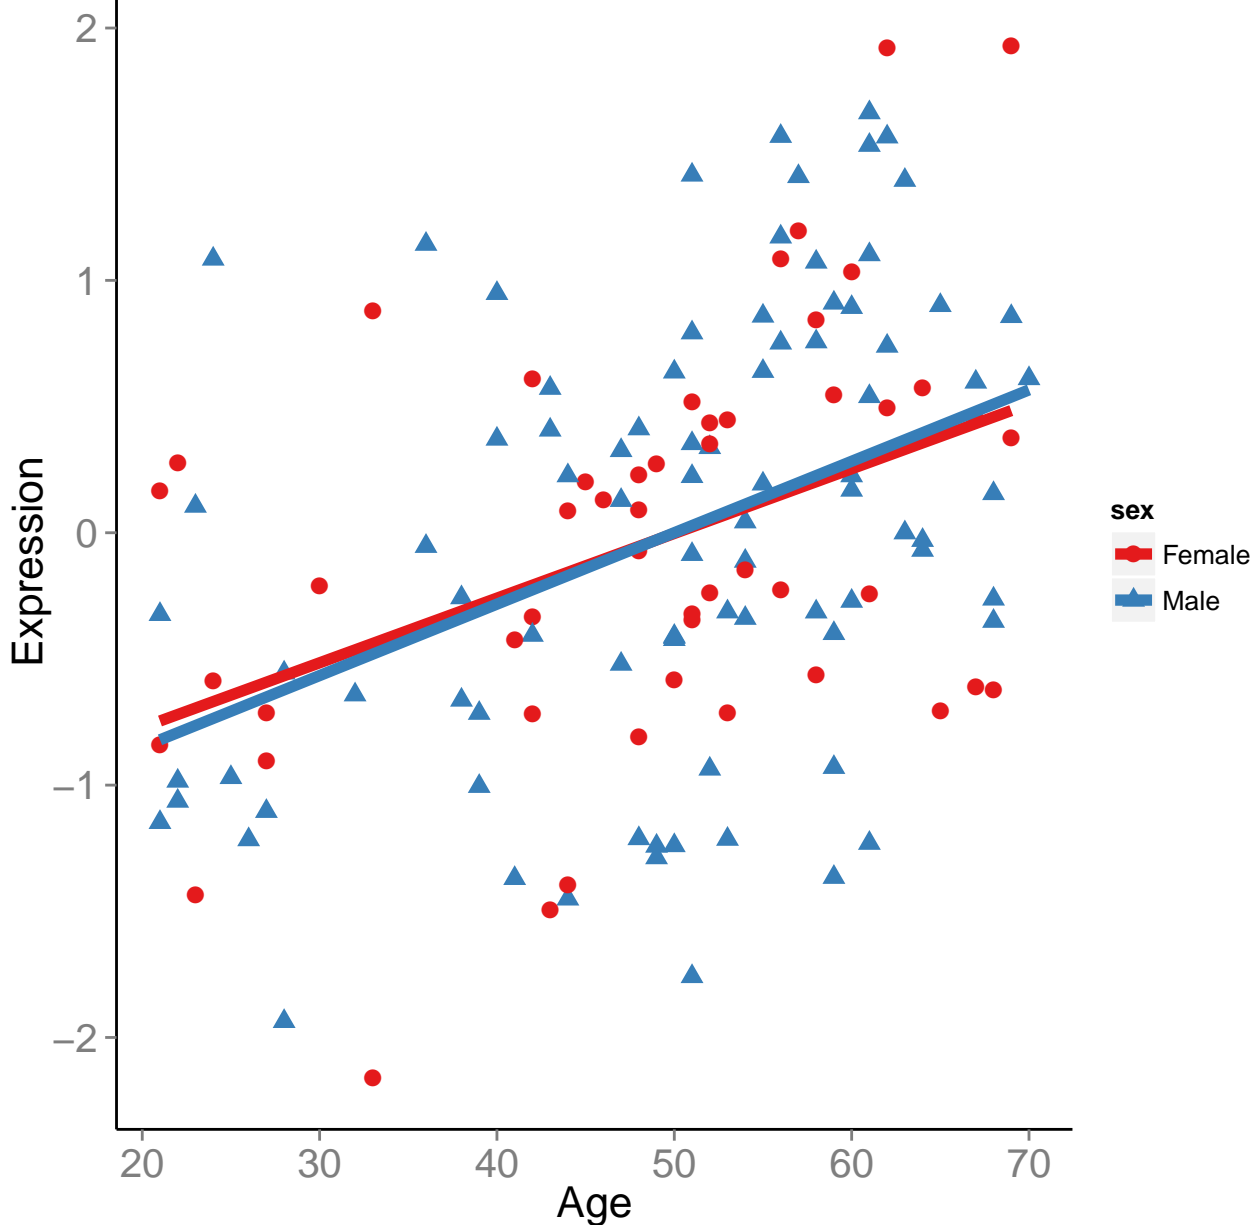

Muscle: MRPS25 Pearson-R=0.42 Pval=3.79E-07

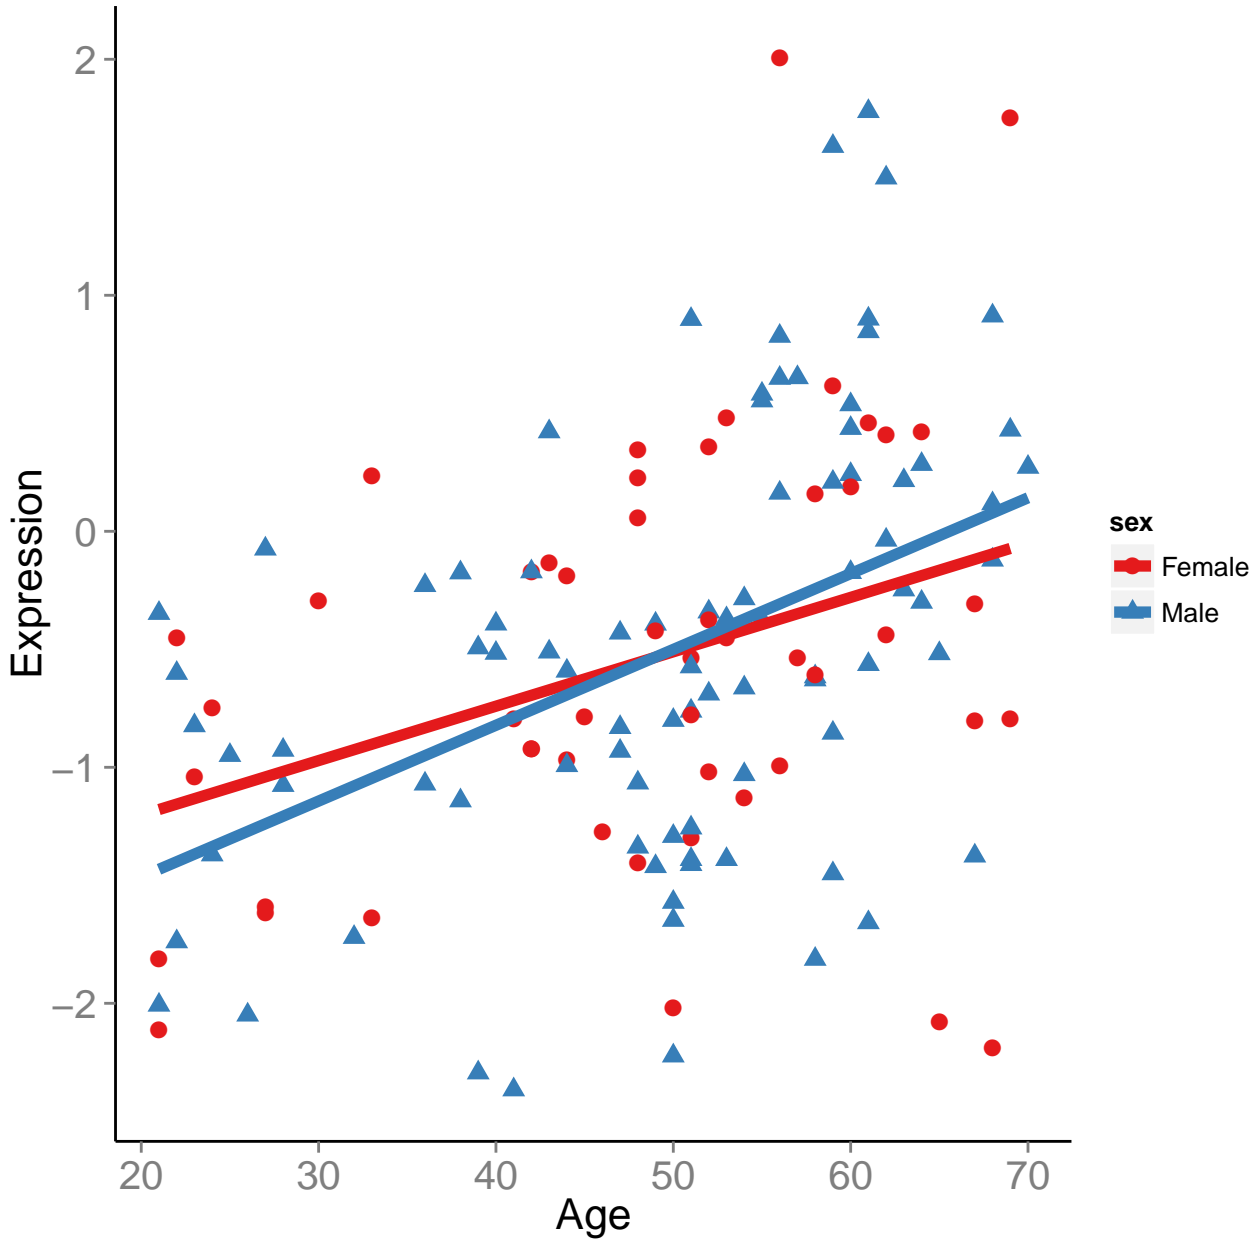

Muscle: ANAPC7 Pearson-R=0.41 Pval=4.46E-07

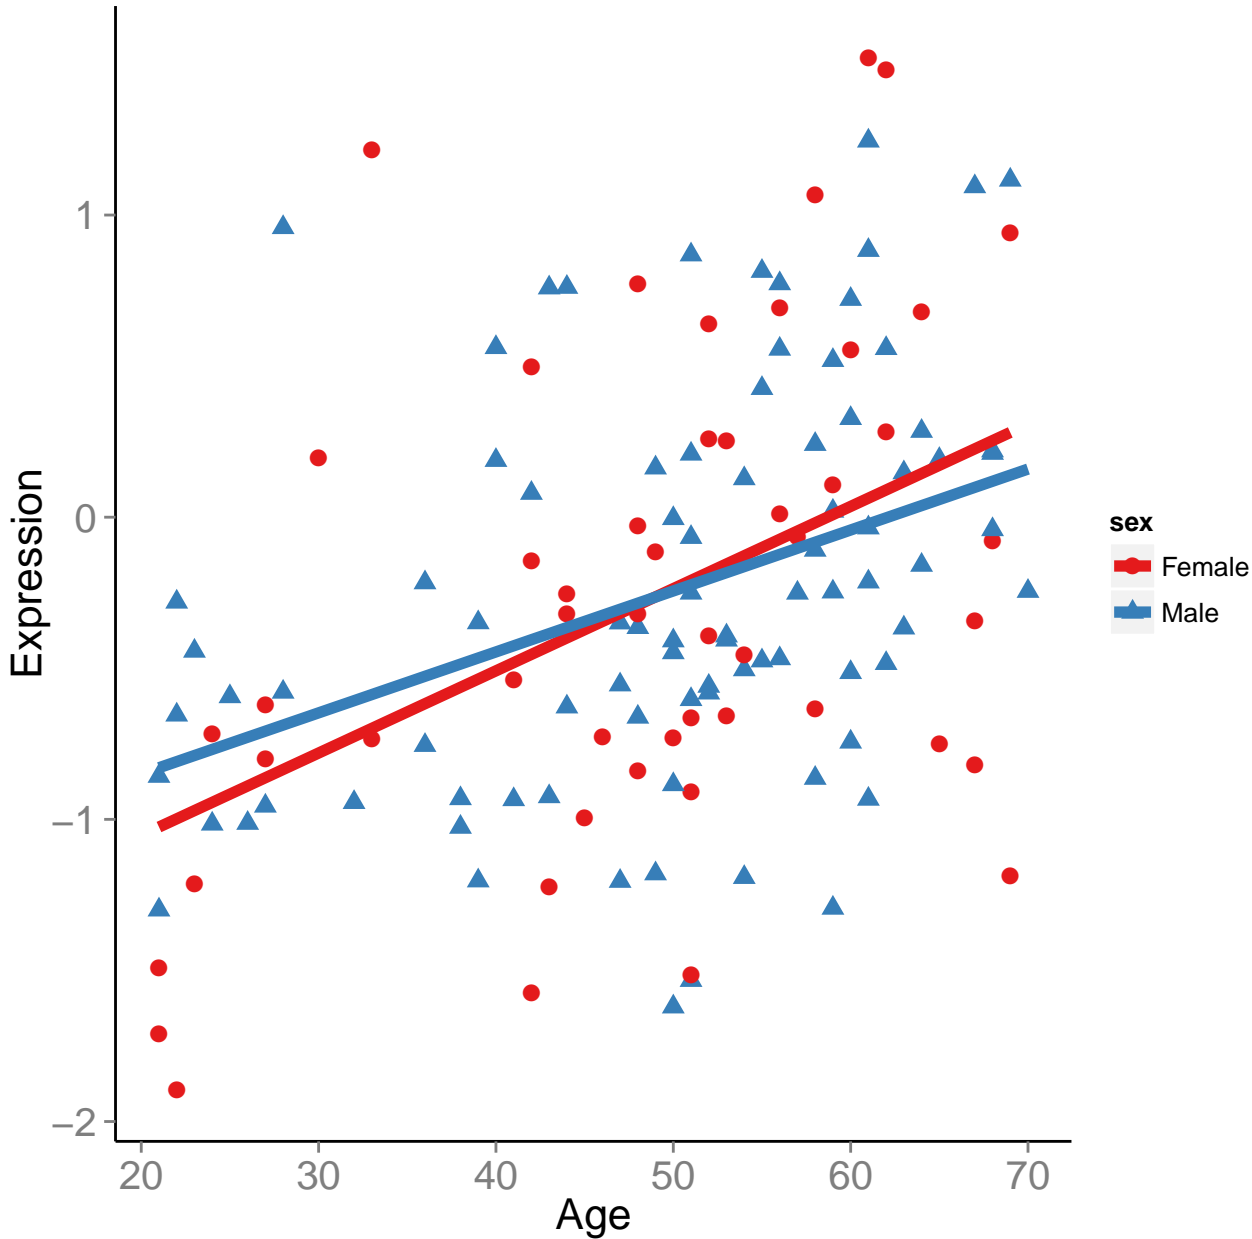

Muscle: HDAC6 Pearson-R=0.41 Pval=5.42E-07

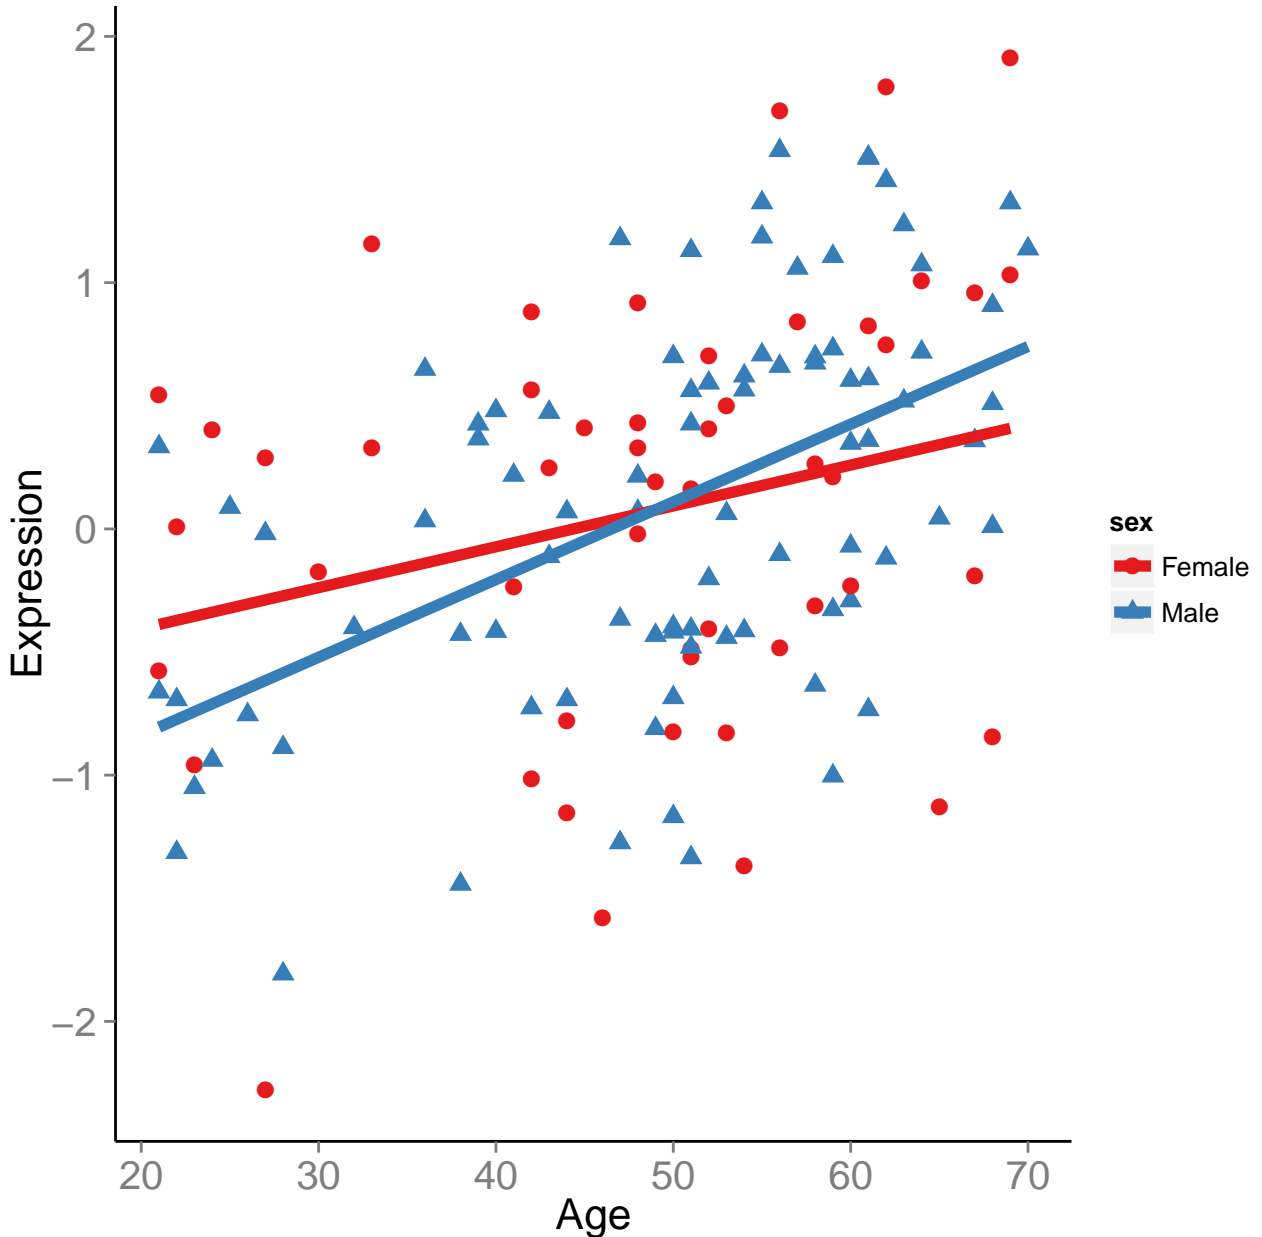

Muscle: ATP13A1 Pearson-R=0.41 Pval=5.57E-07

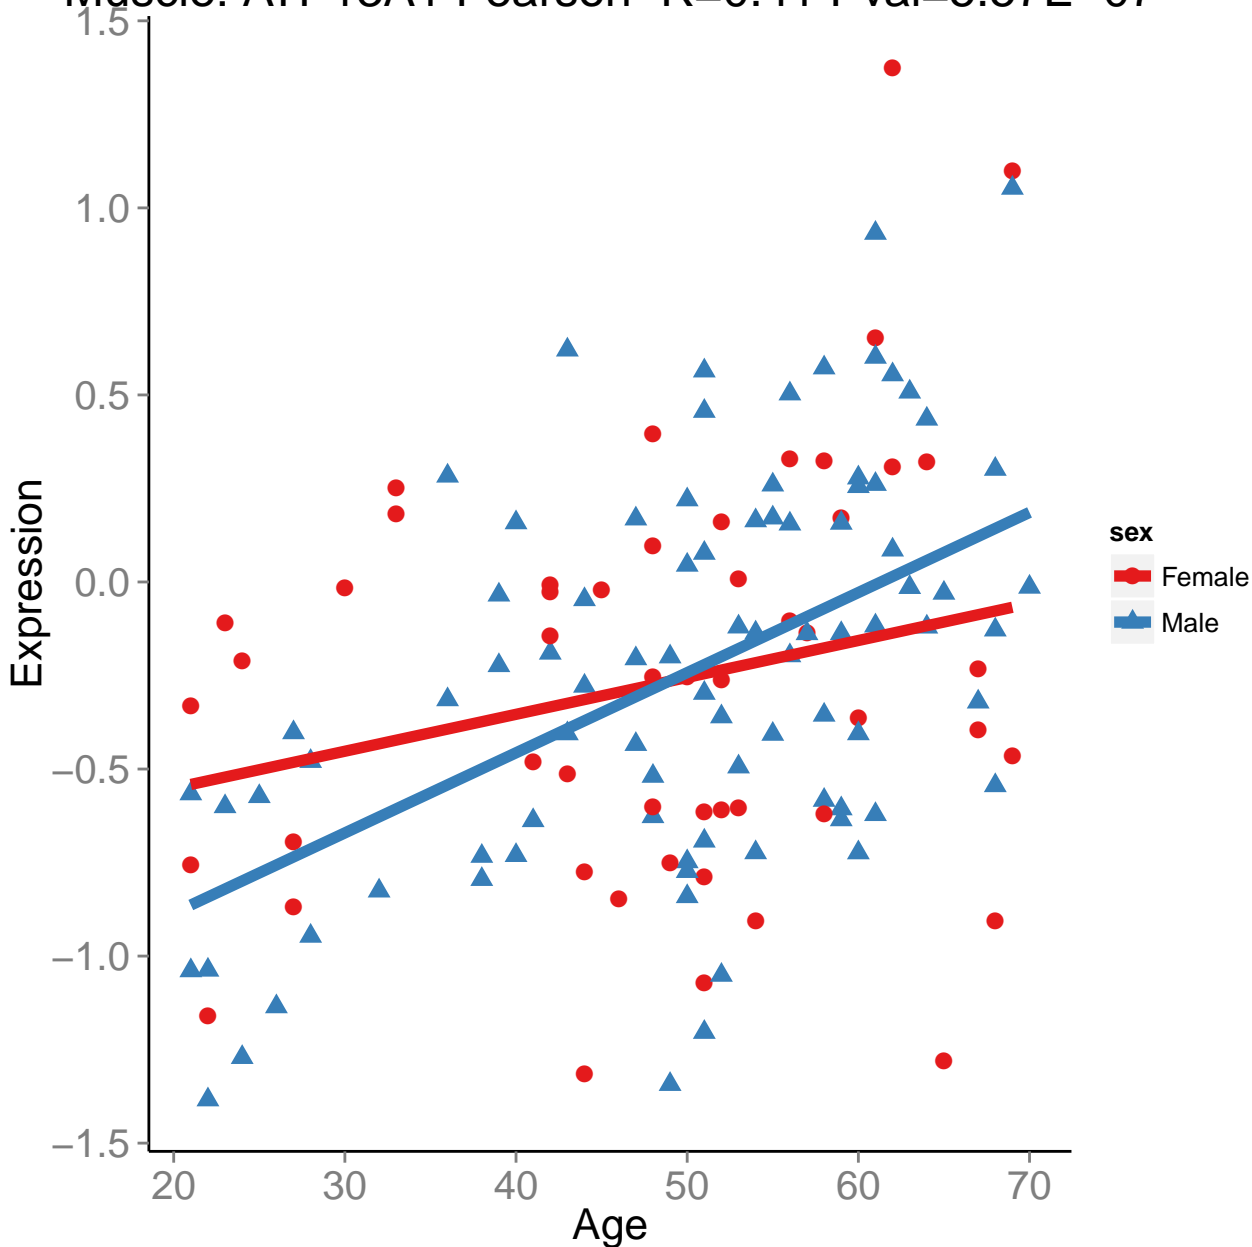

Muscle: PPP2R1A Pearson-R=0.41 Pval=5.18E-07

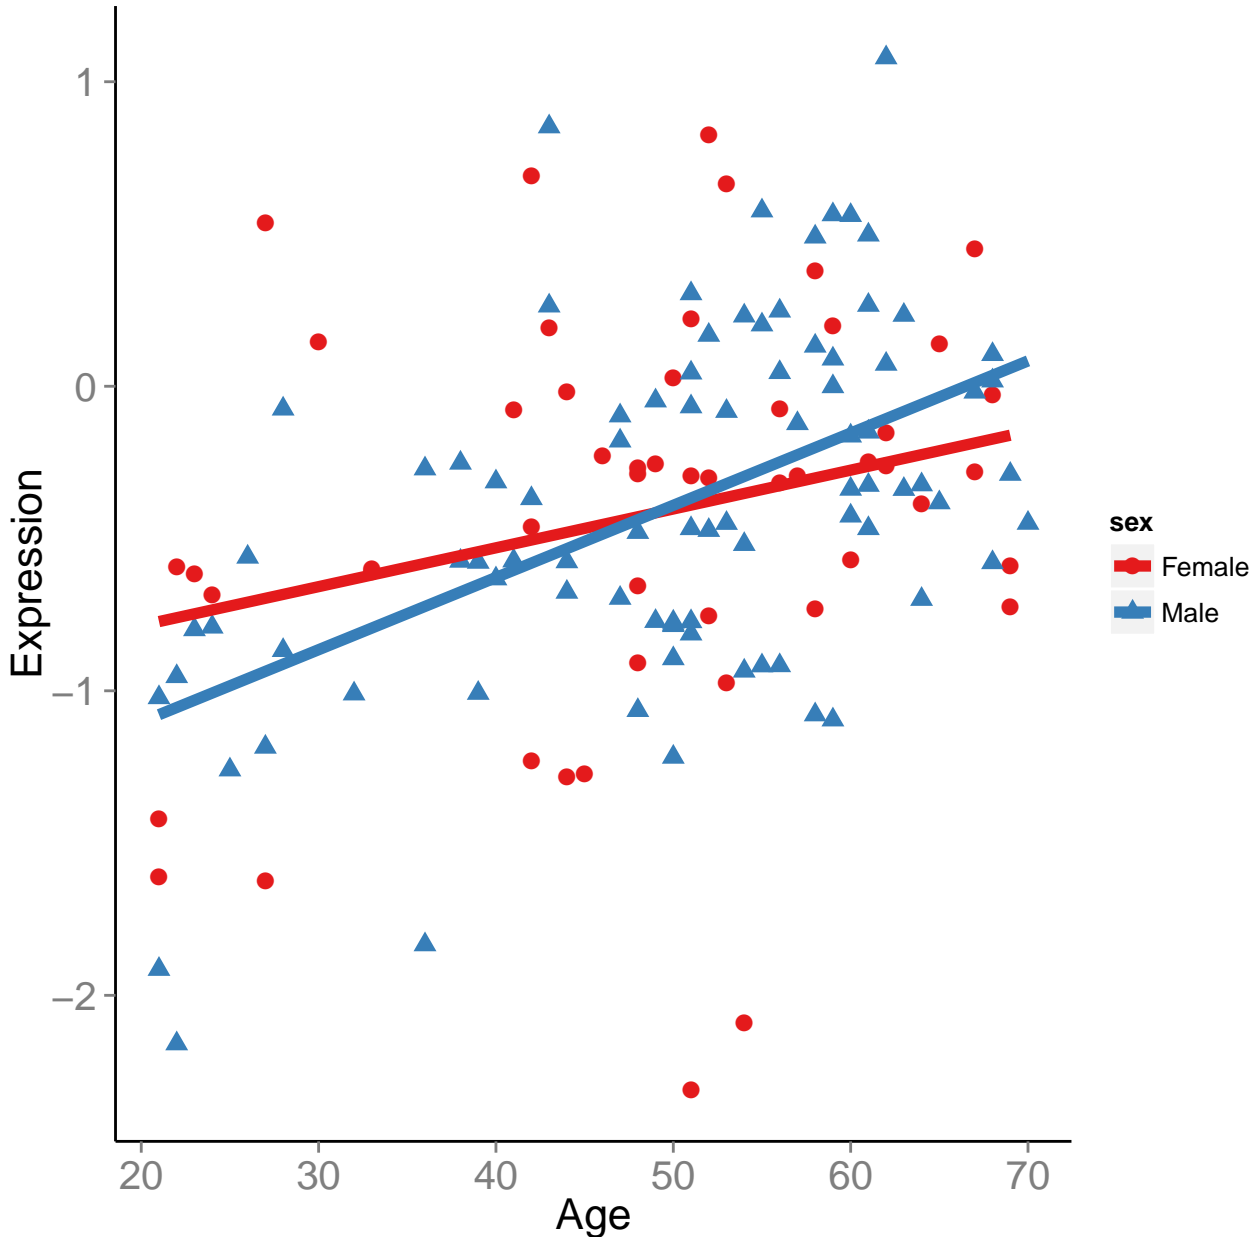

Muscle: REV1 Pearson-R=0.41 Pval=5.51E-07

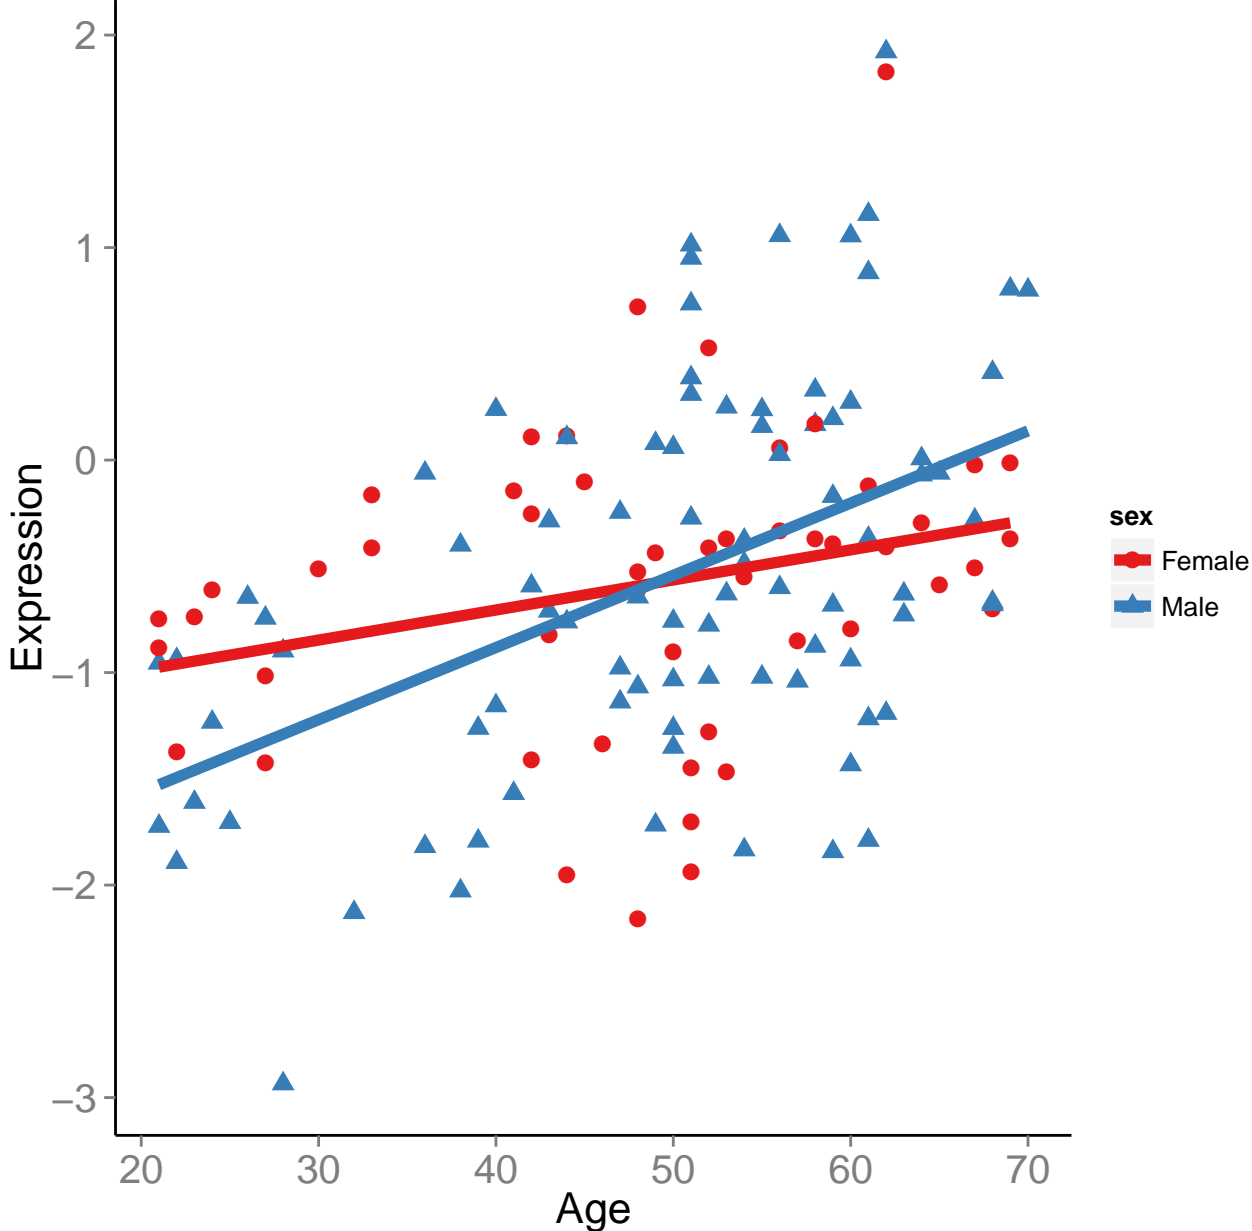

Muscle: SLPI Pearson-R=0.41 Pval=5.43E-07

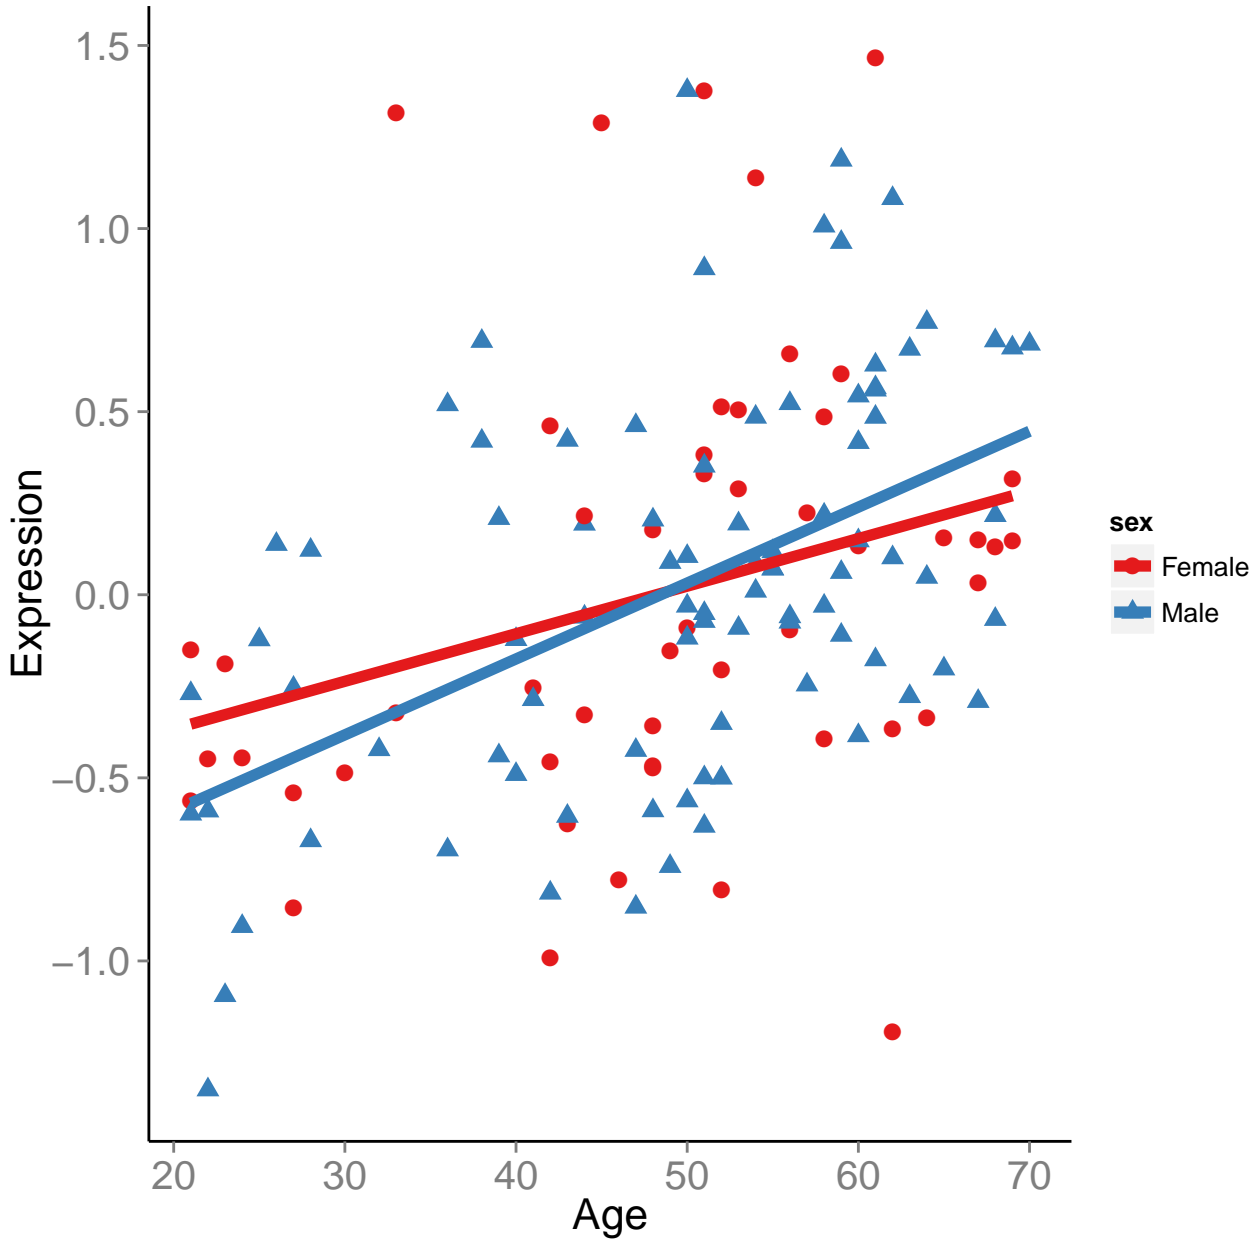



Muscle: MKLN1 Pearson-R=0.41 Pval=4.83E-07

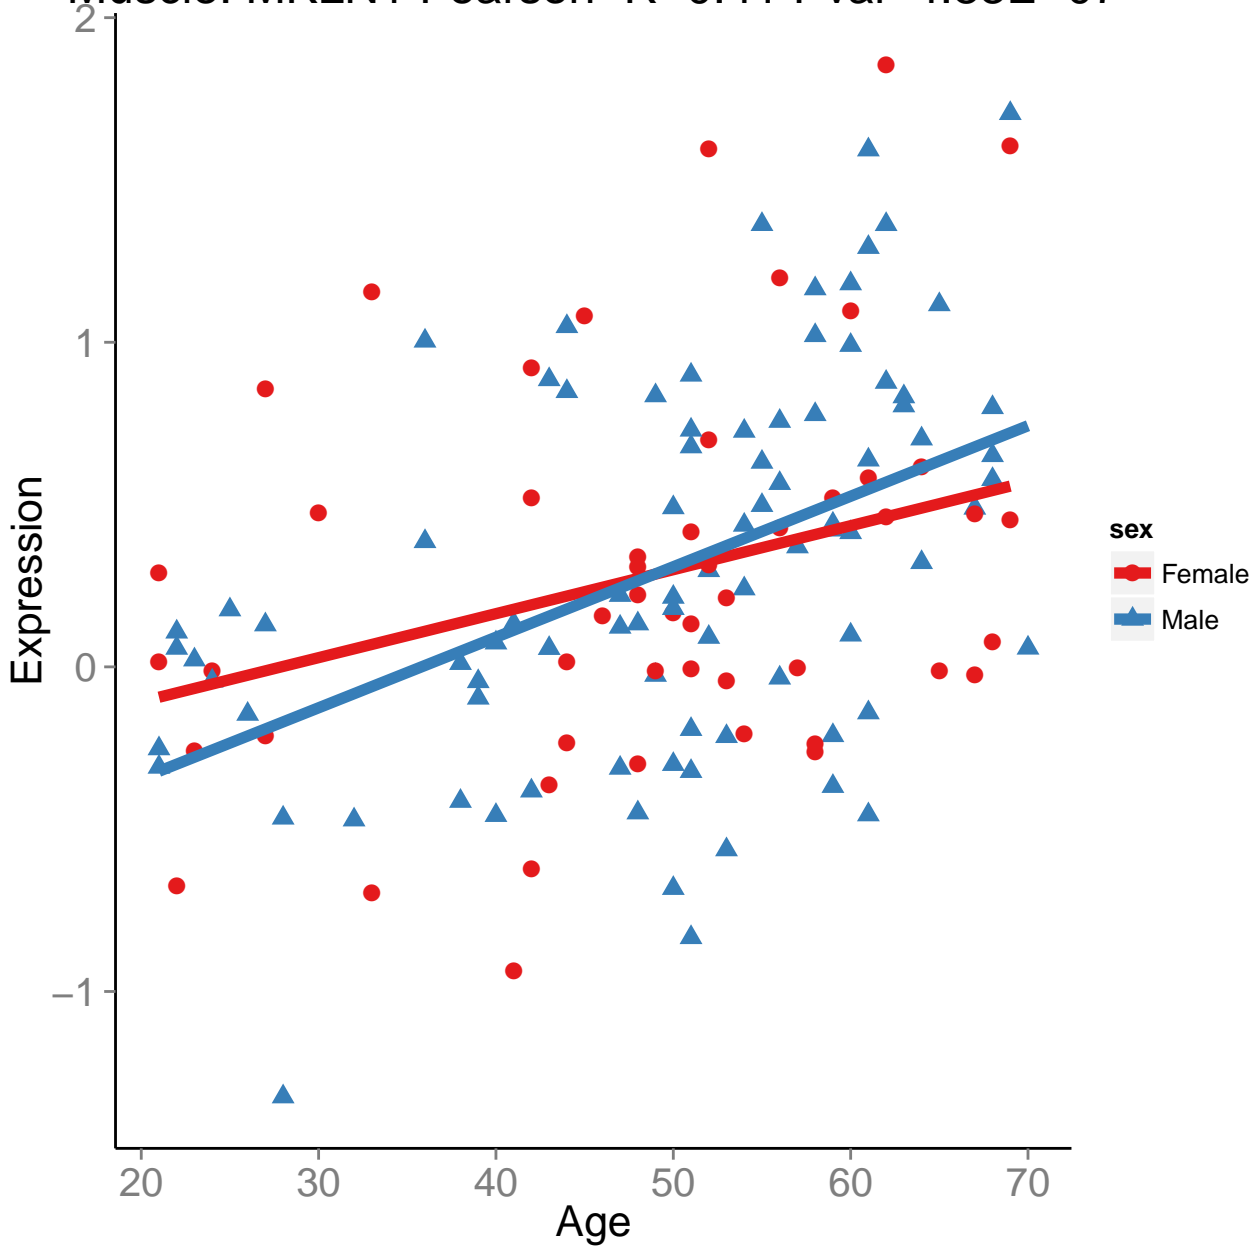

Muscle: TUBGCP6 Pearson-R=0.41 Pval=5.03E-07

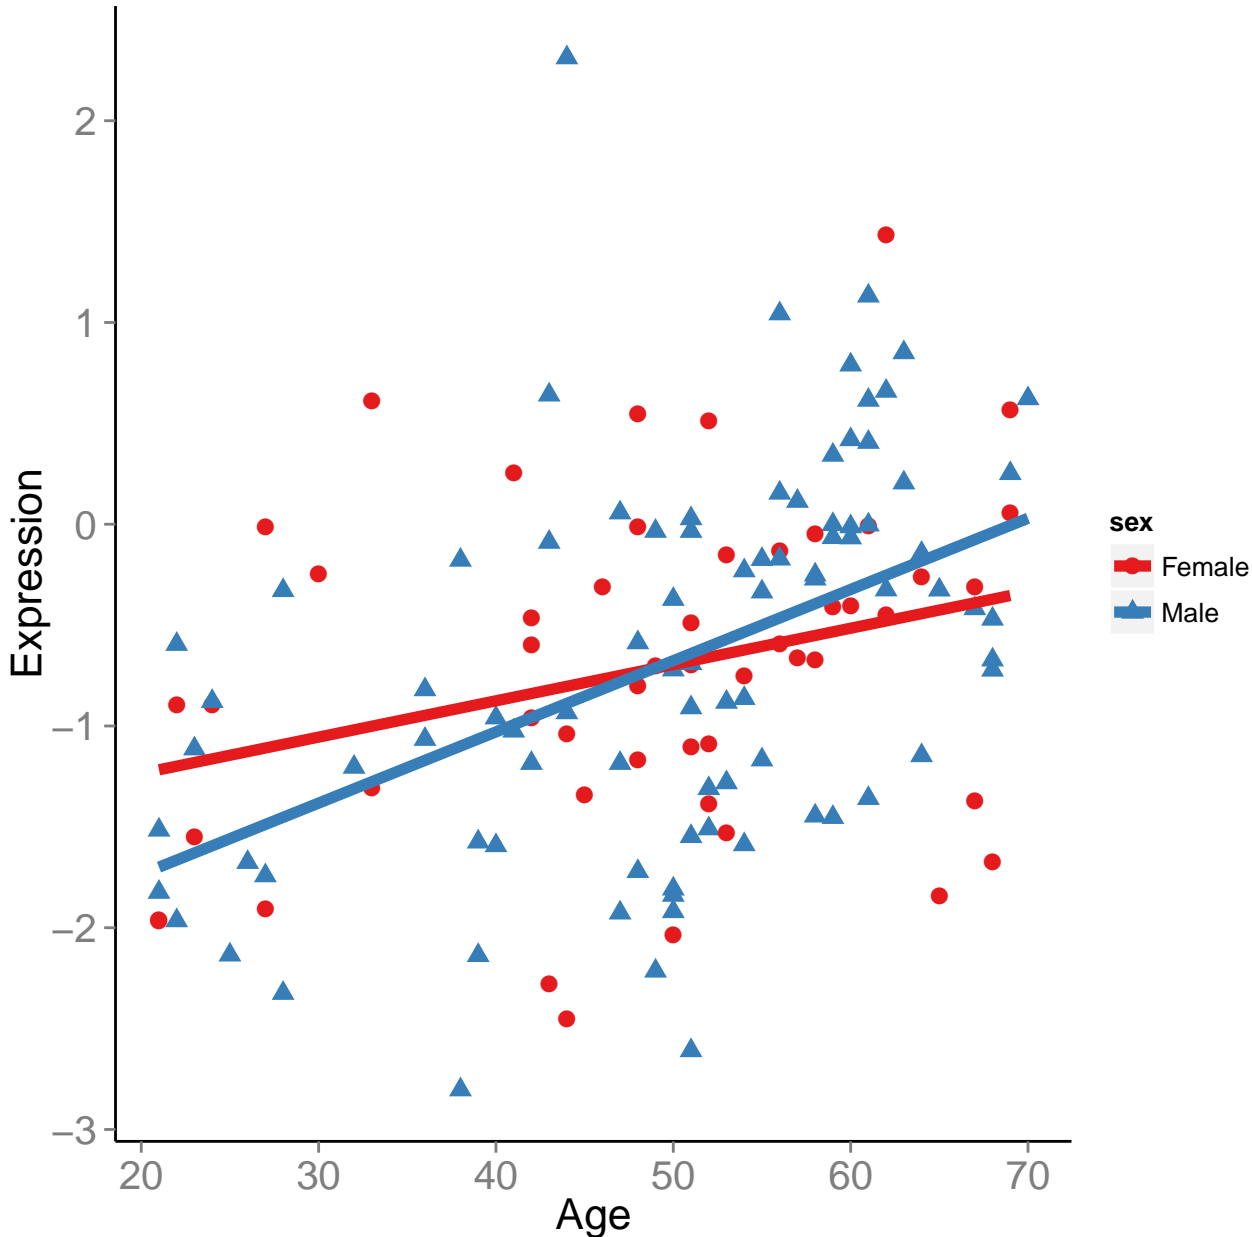

Muscle: CHST3 Pearson-R=0.41 Pval=5.95E-07

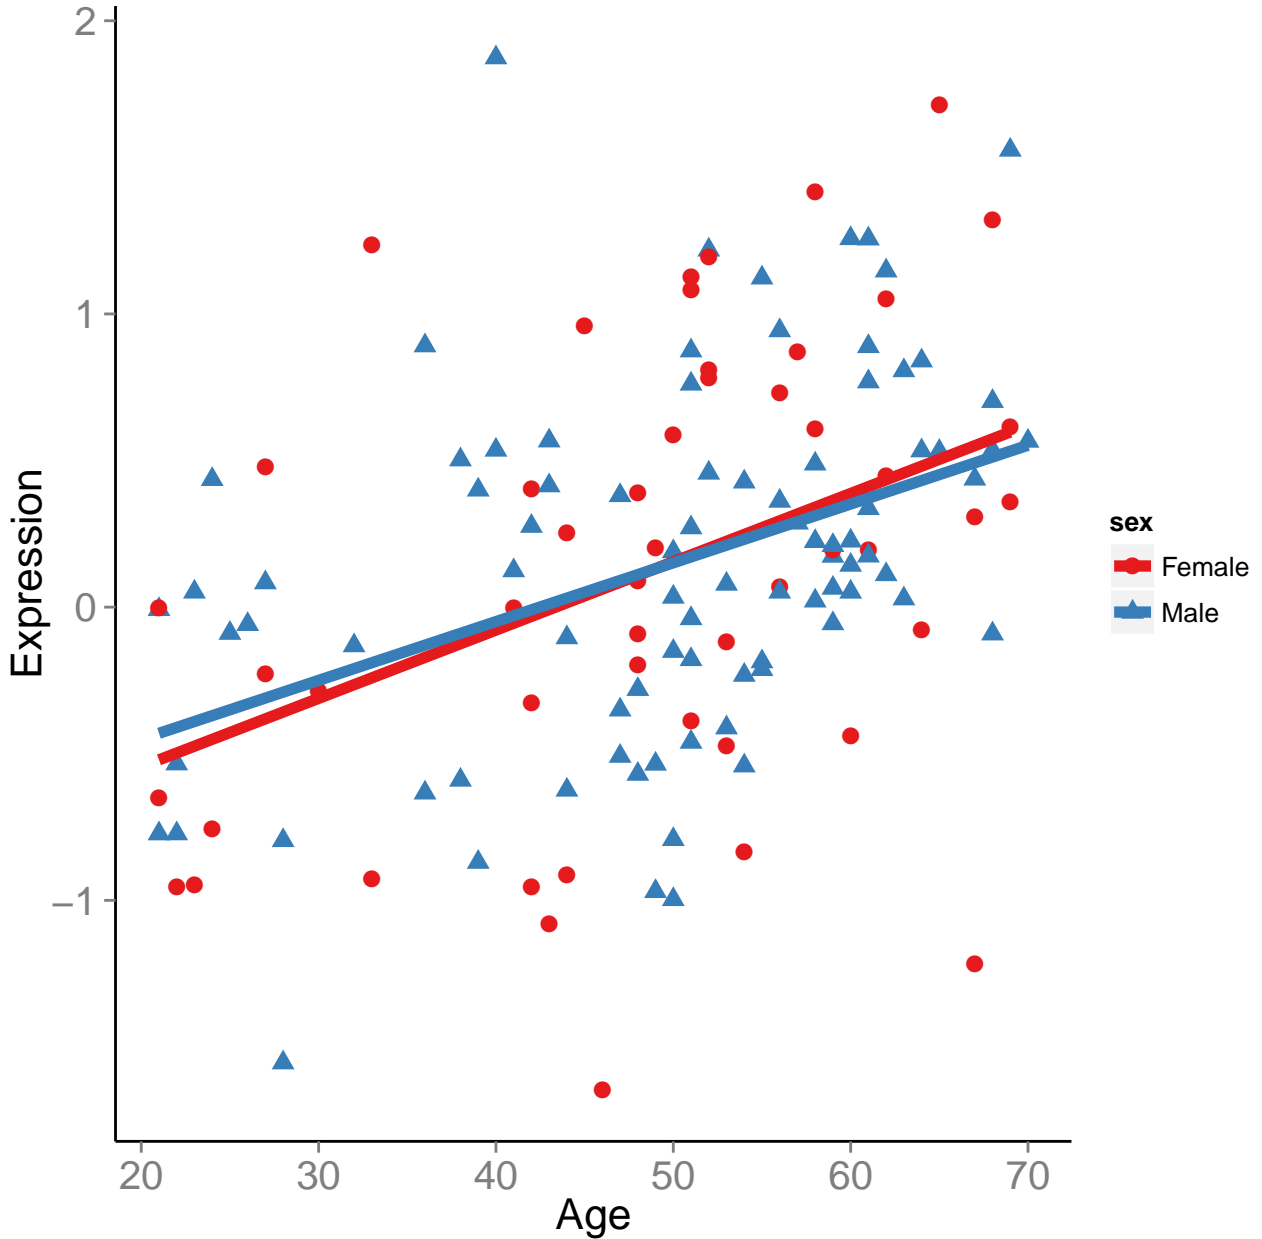

Muscle: NCOA6 Pearson-R=0.41 Pval=6.09E-07

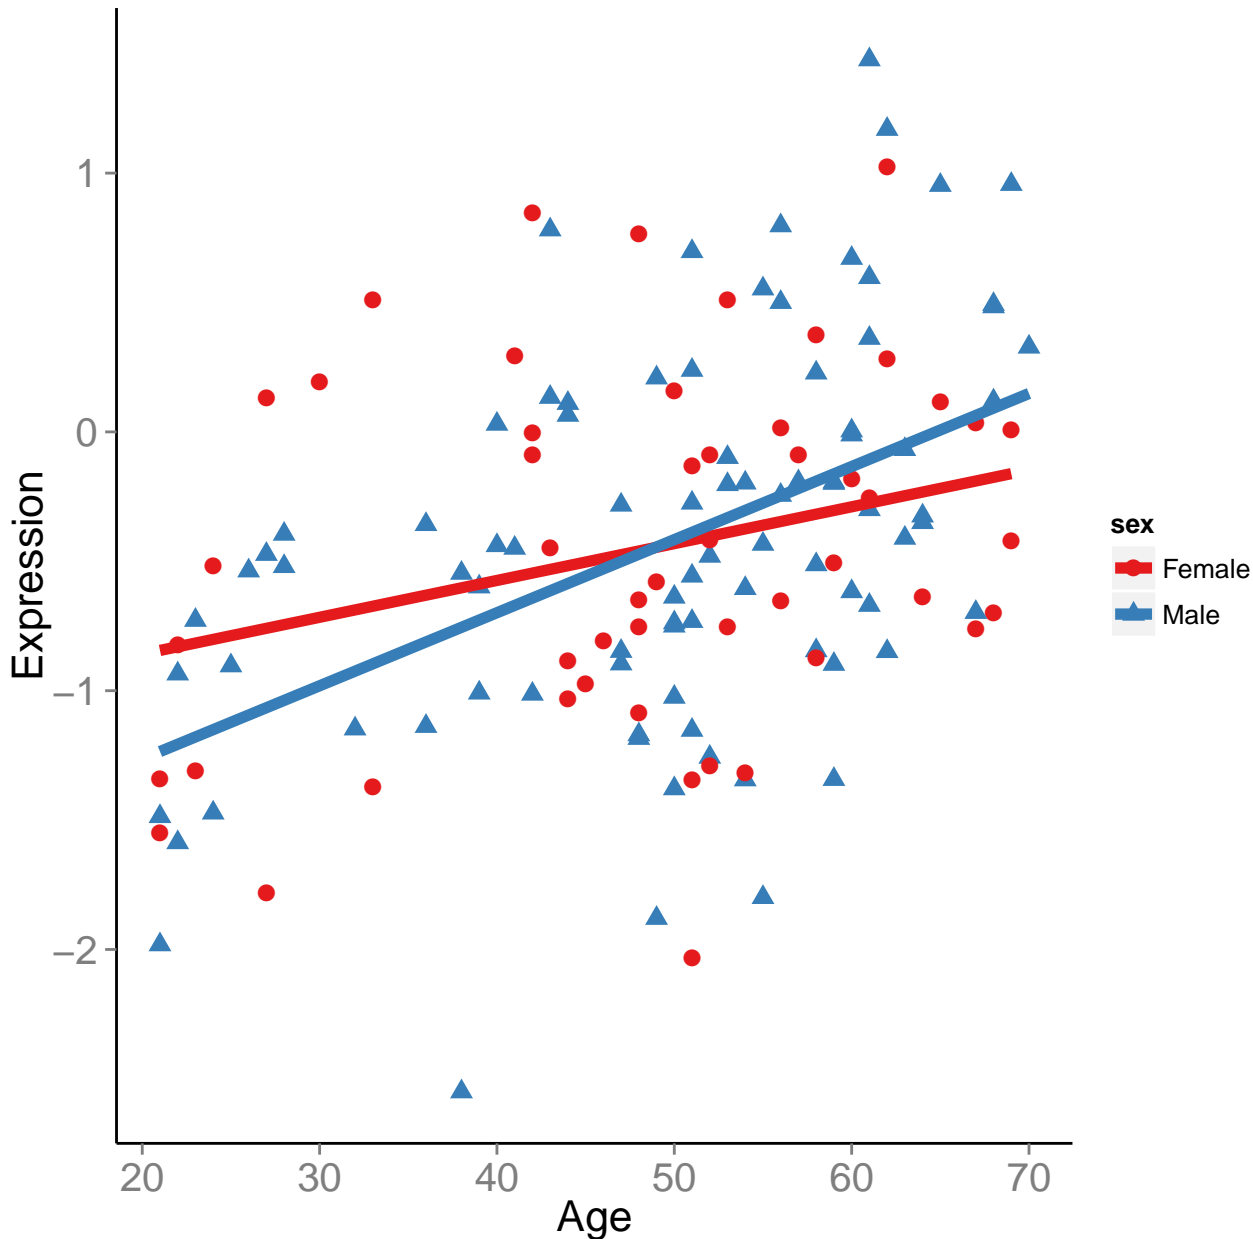

Muscle: SAE1 Pearson-R=0.41 Pval=6.49E-07

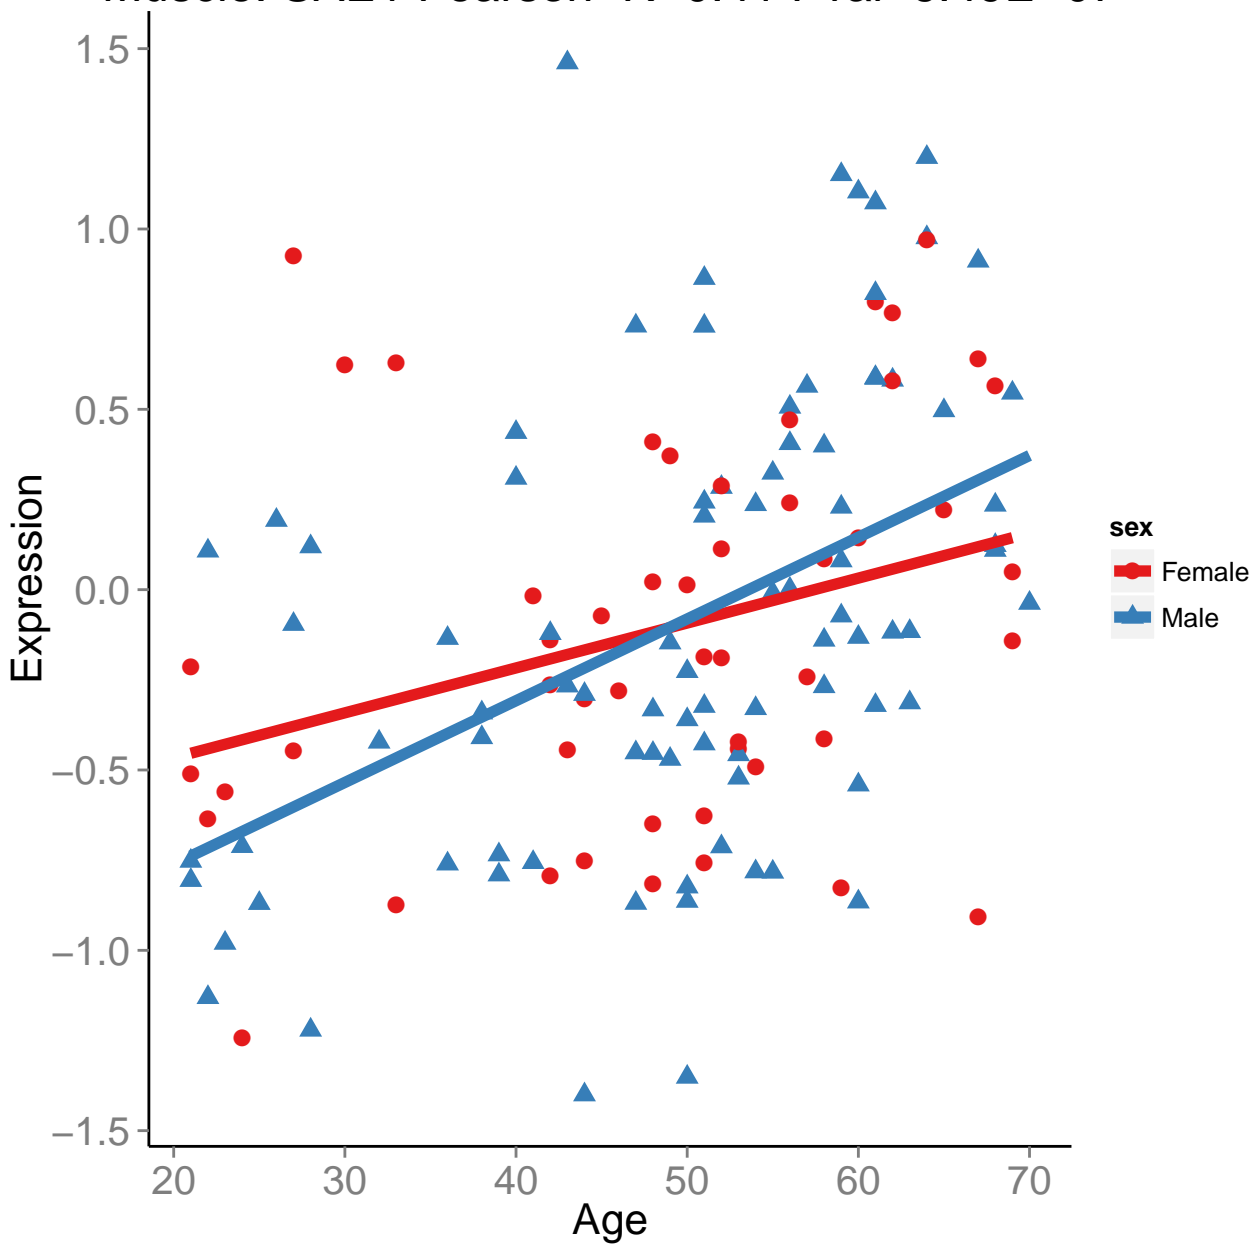

Muscle: TTI1 Pearson-R=0.41 Pval=8.15E-07

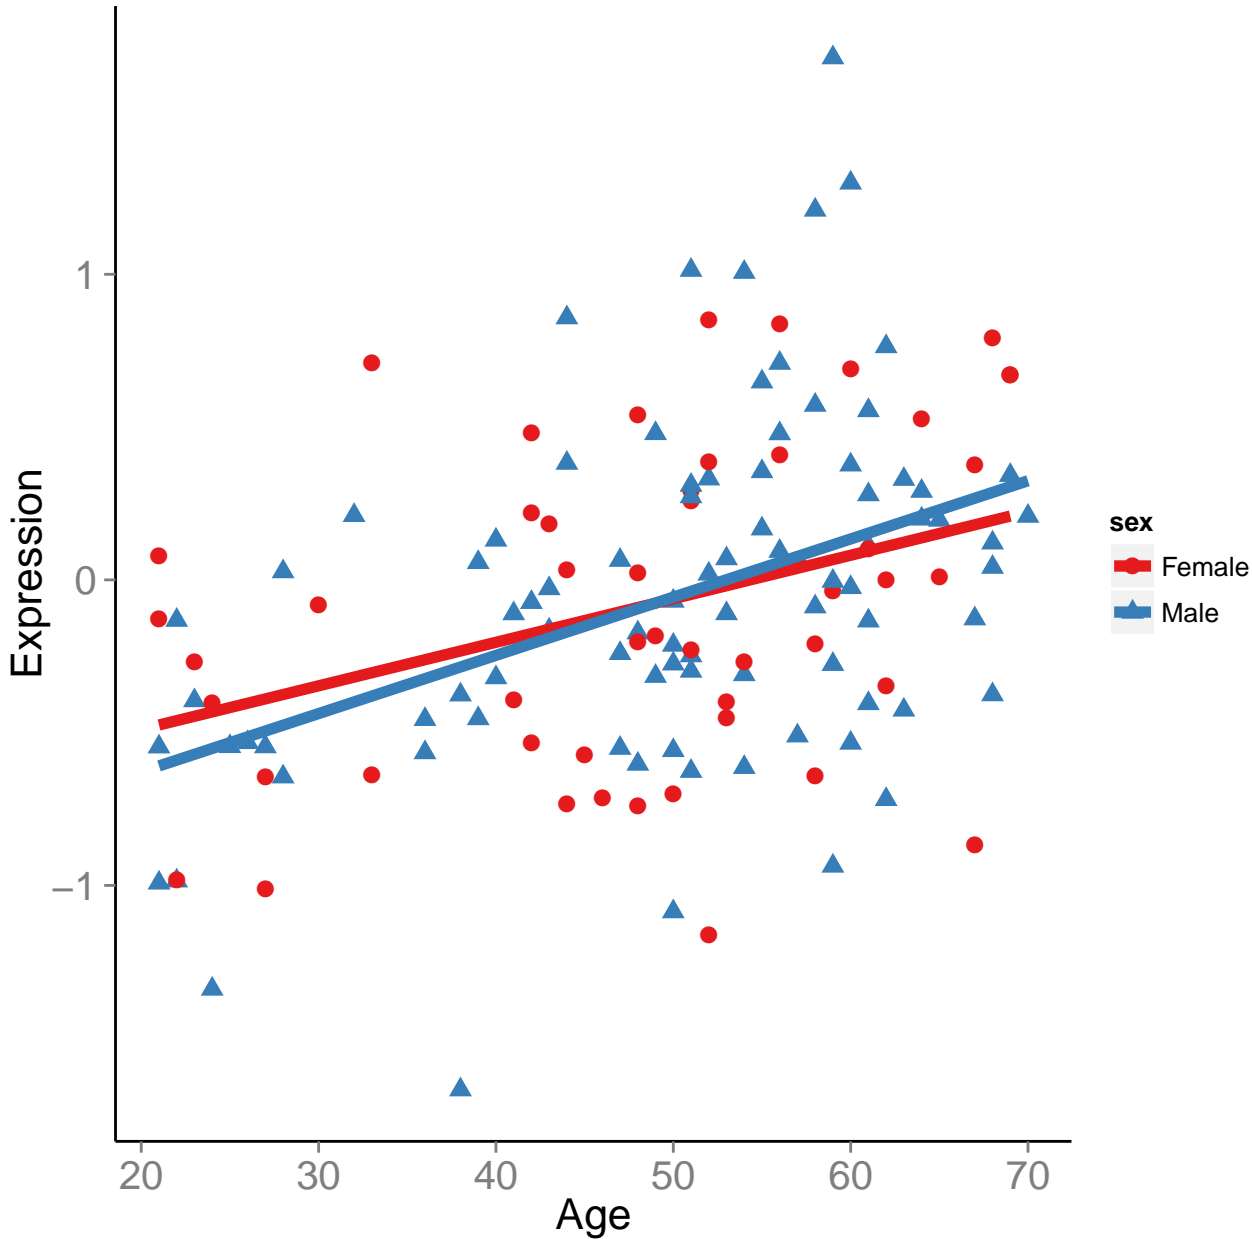

Muscle: EPG5 Pearson-R=0.40 Pval=8.47E-07

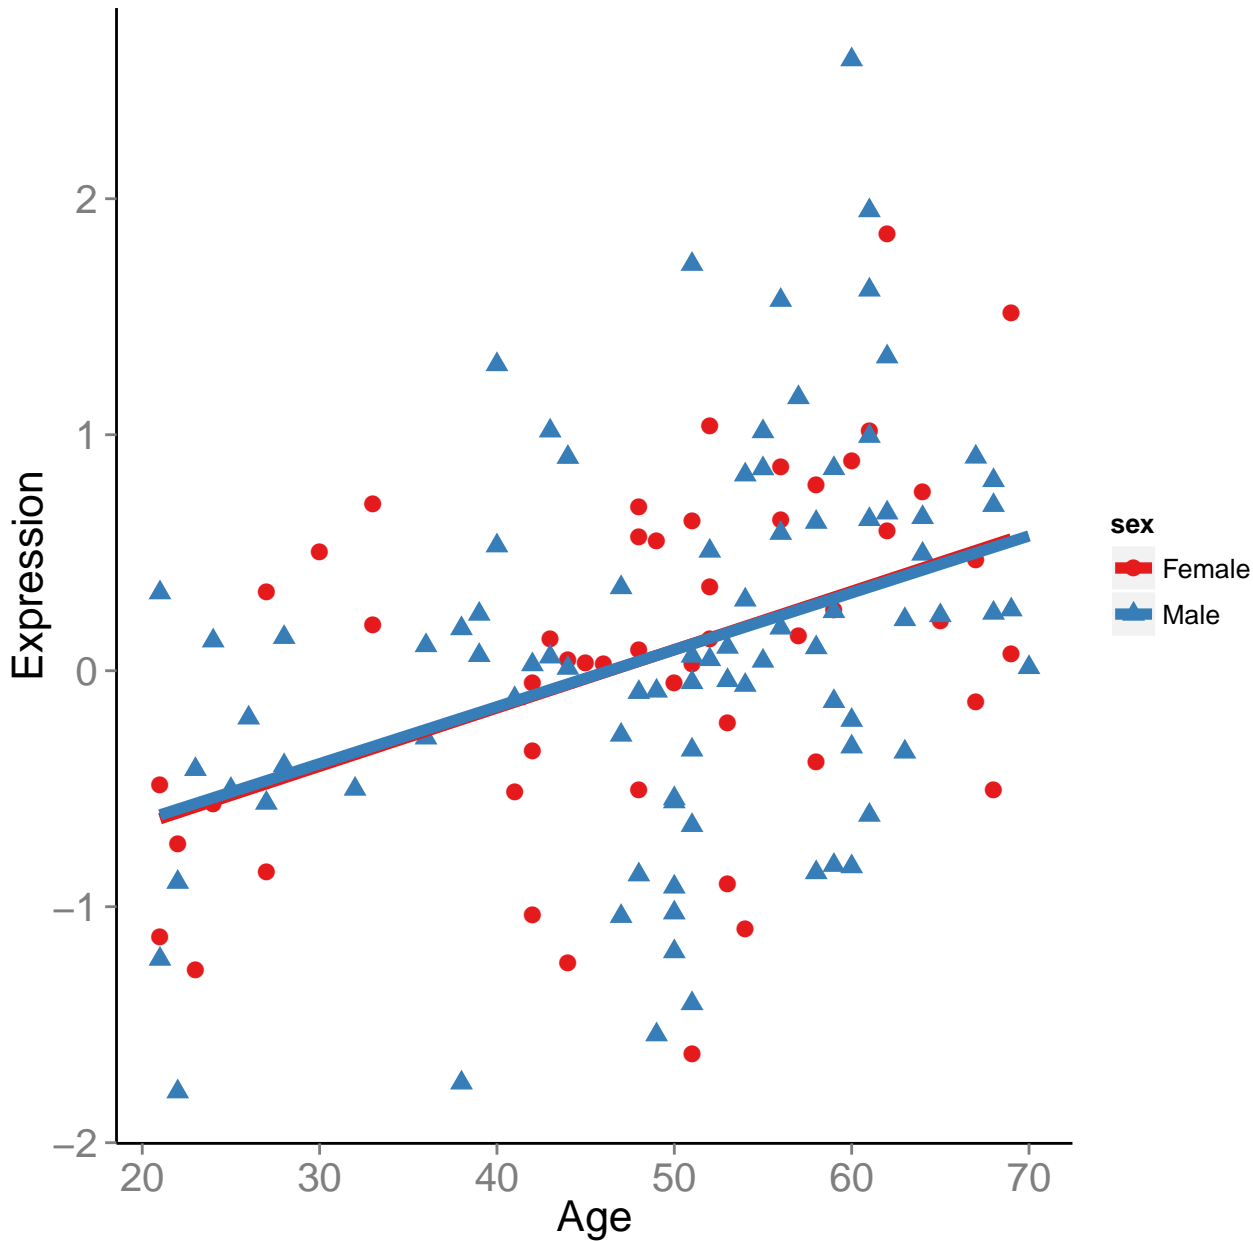

Muscle: ADCK5 Pearson-R=0.40 Pval=9.18E-07

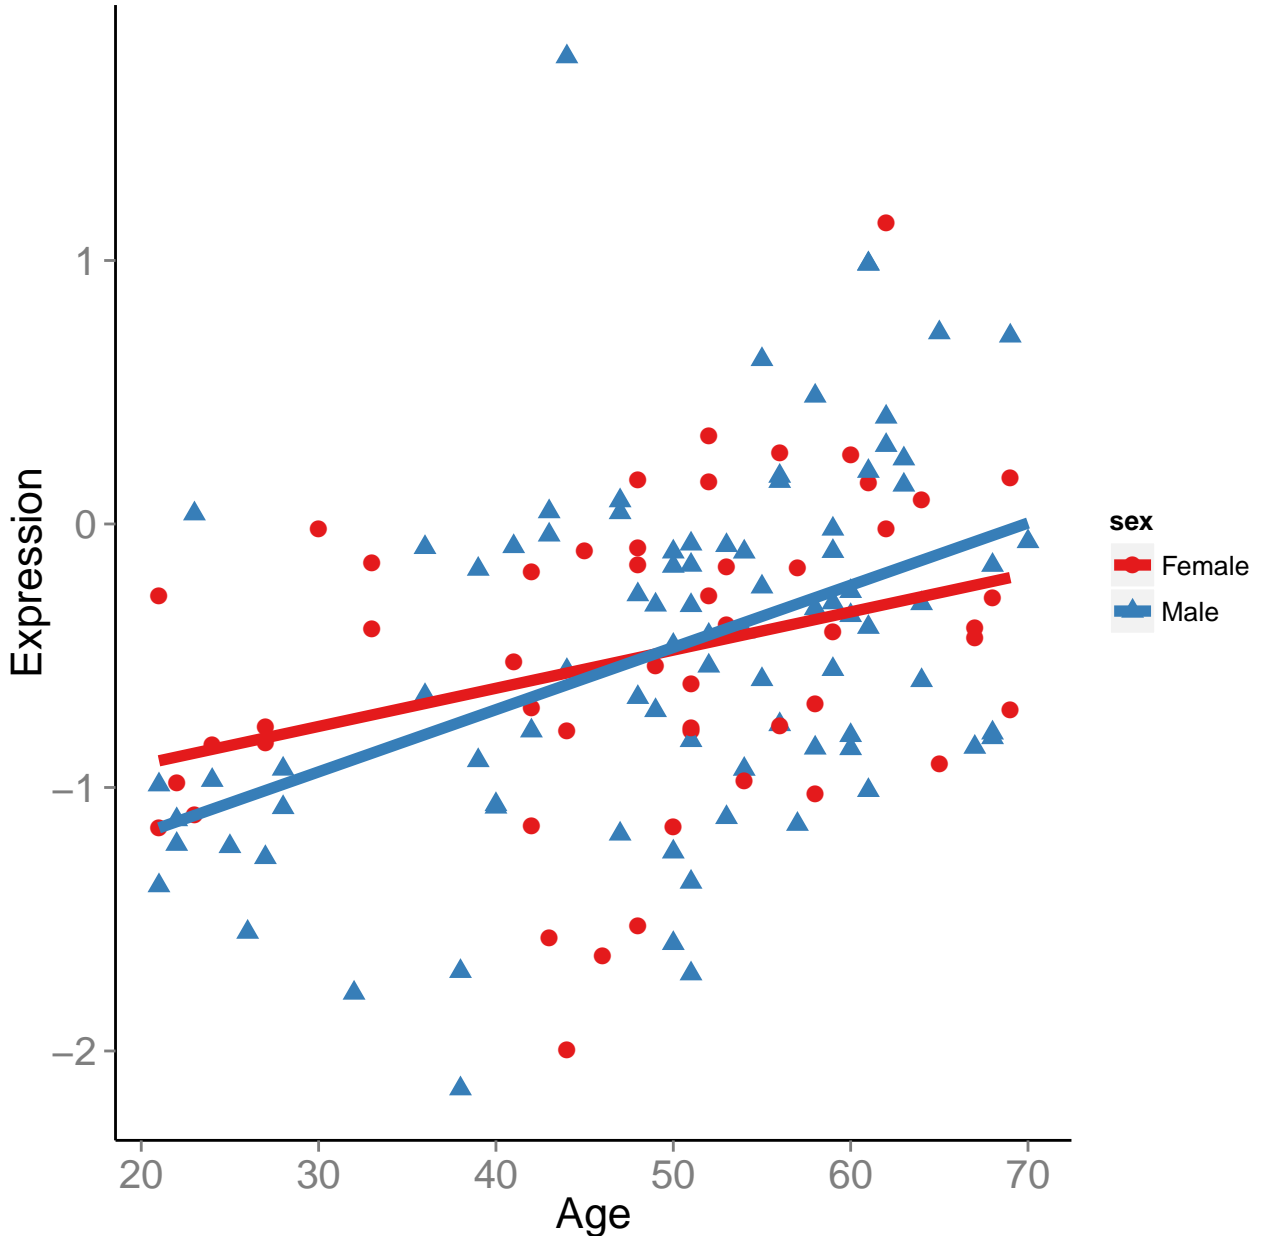



Muscle: PDZRN3 Pearson-R=-0.40 Pval=9.68E-07

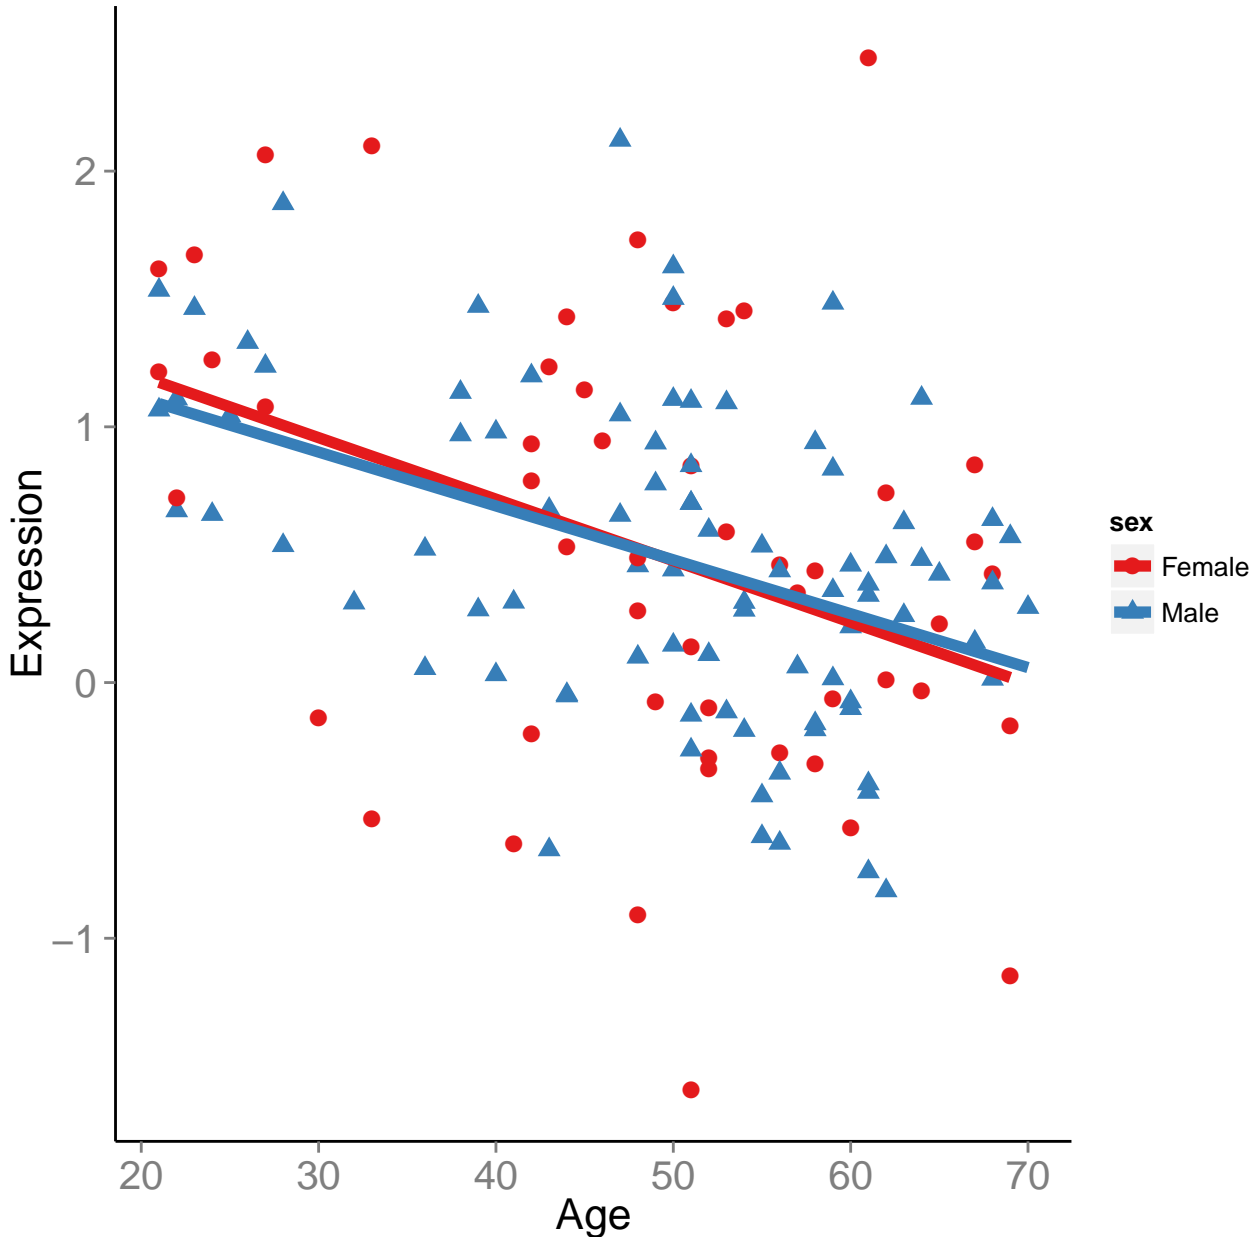

Muscle: SPG11 Pearson-R=0.40 Pval=1.00E-06

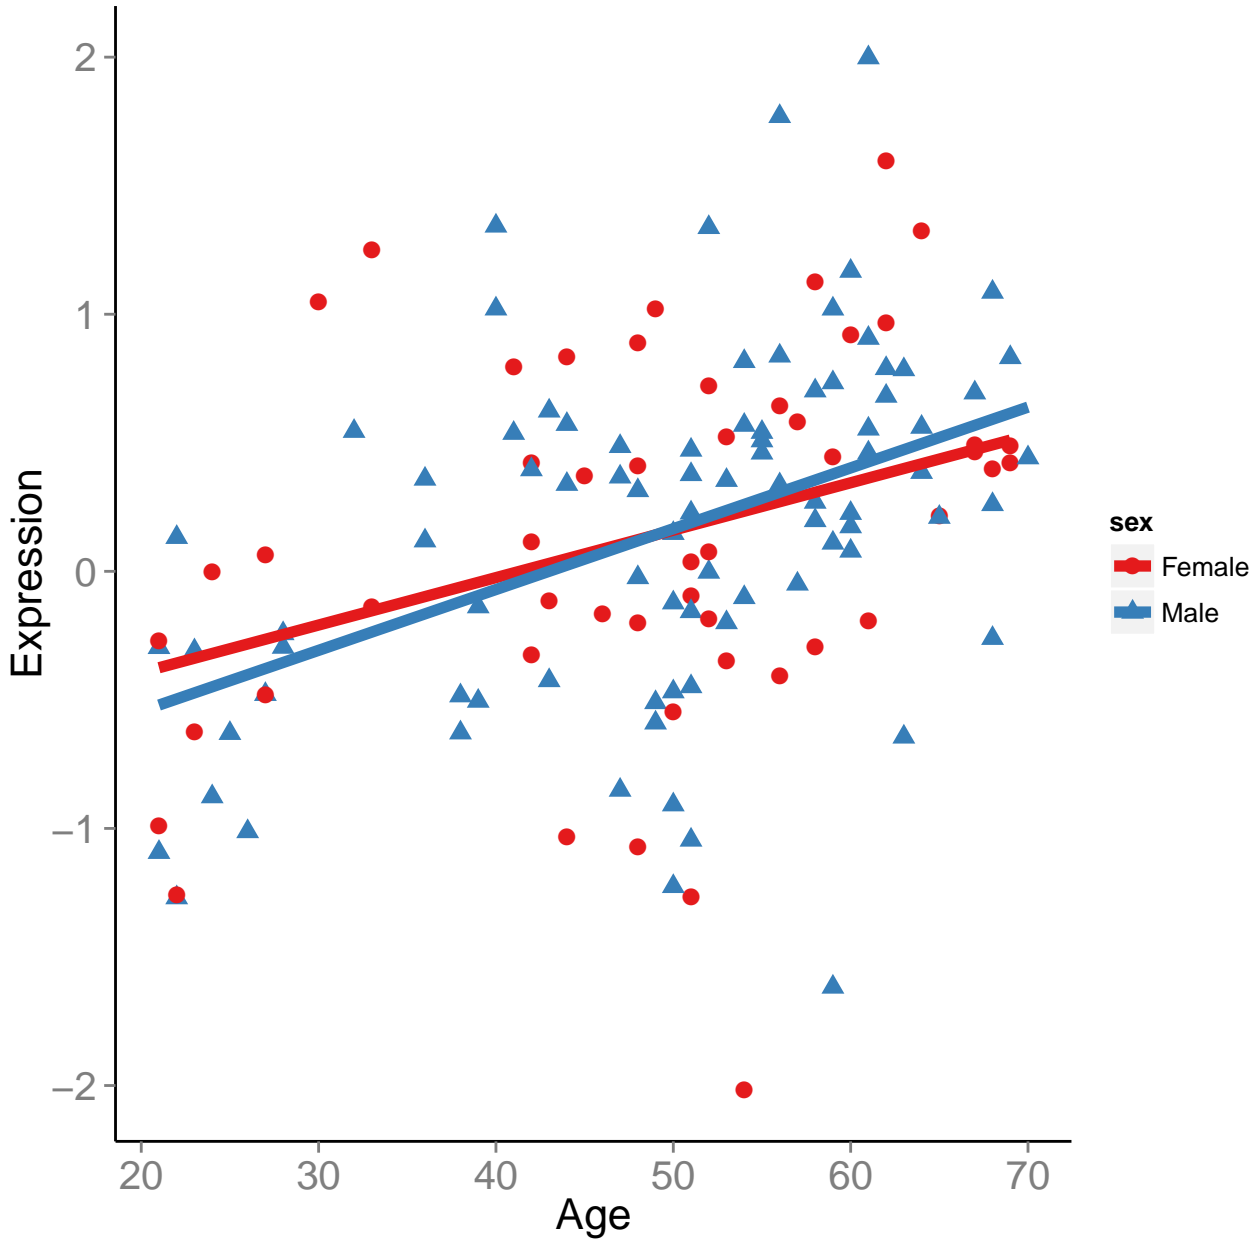

Muscle: NUP205 Pearson-R=0.40 Pval=1.11E-06

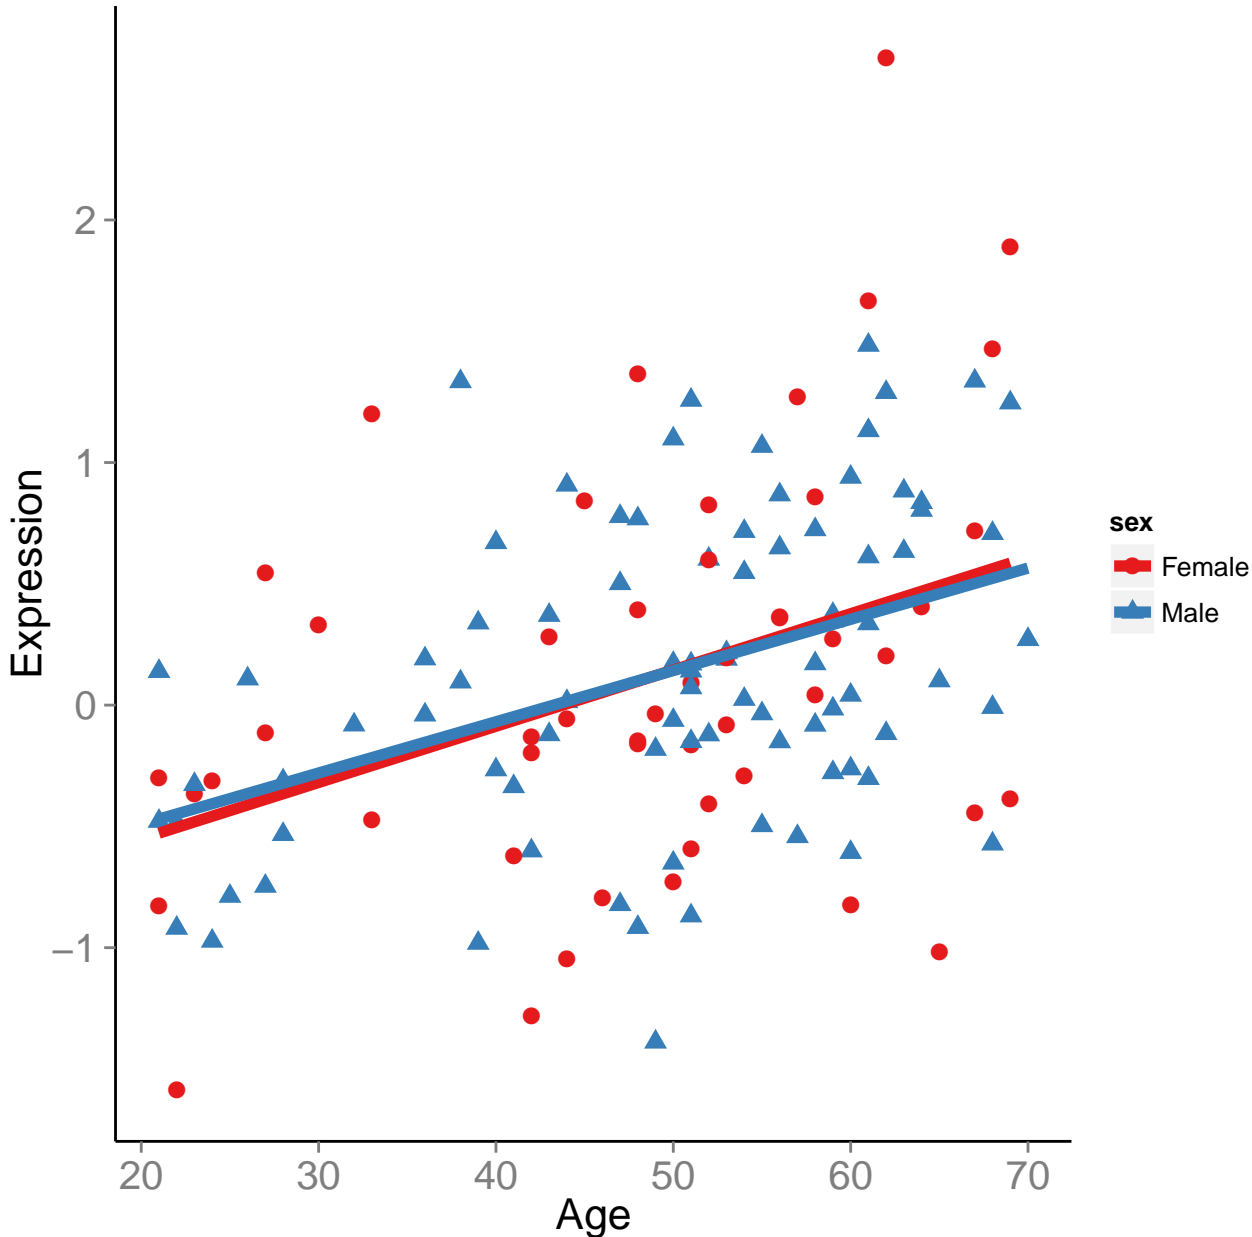

Muscle: GREB1L Pearson-R=0.40 Pval=1.20E-06

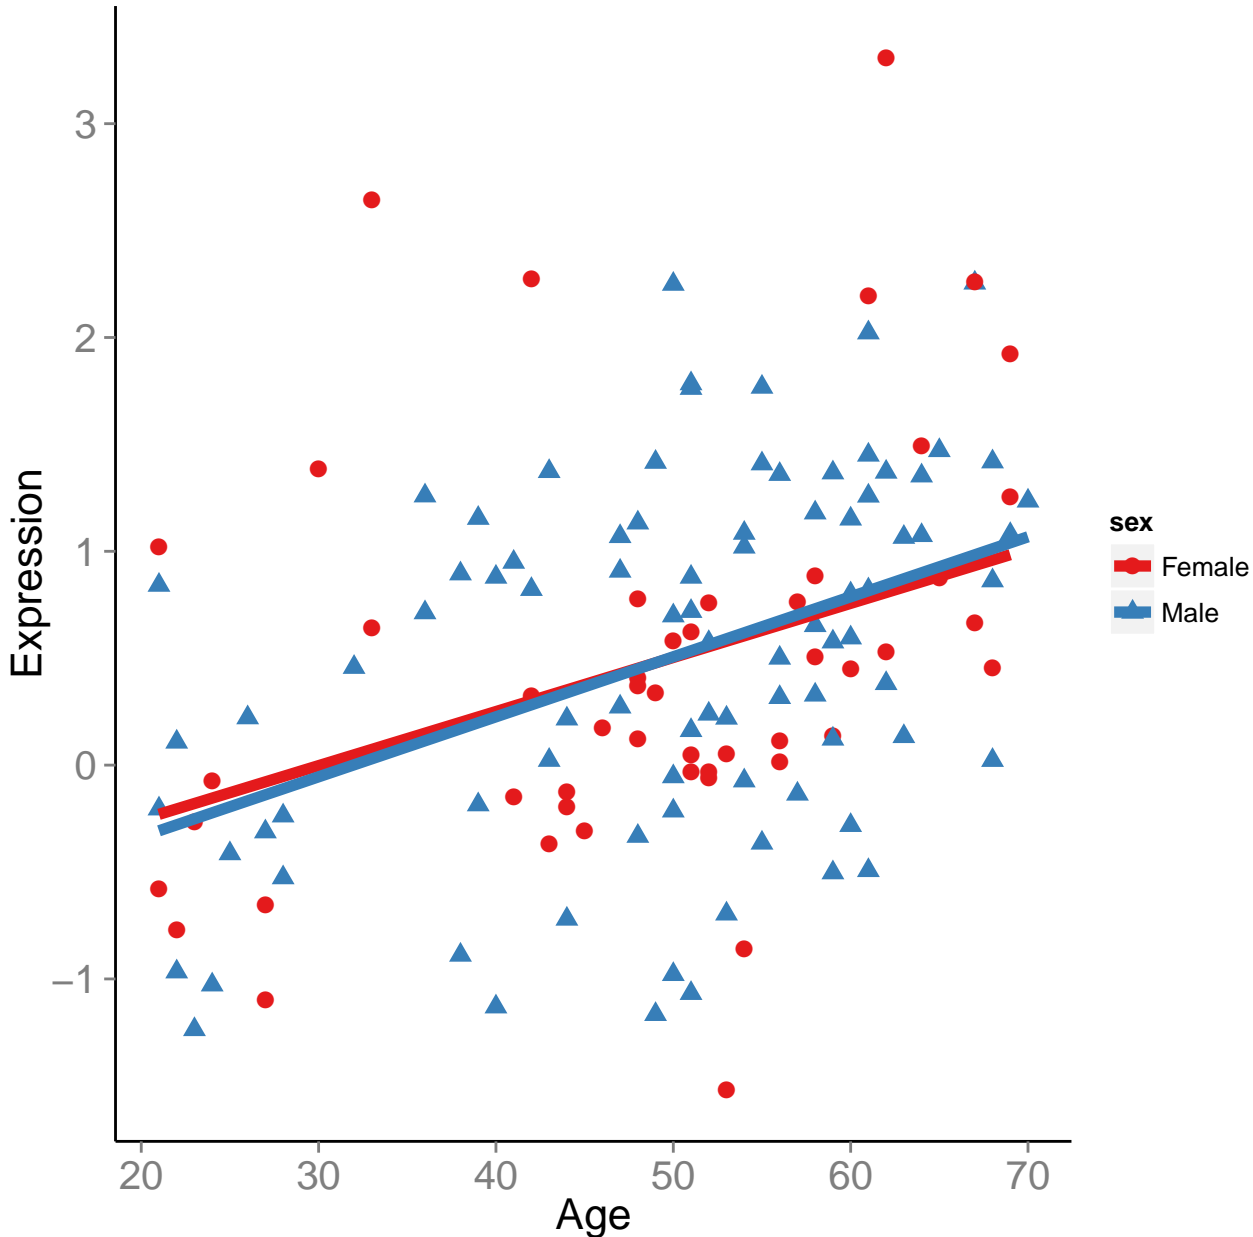

Muscle: C1orf123 Pearson-R=0.40 Pval=1.22E-06

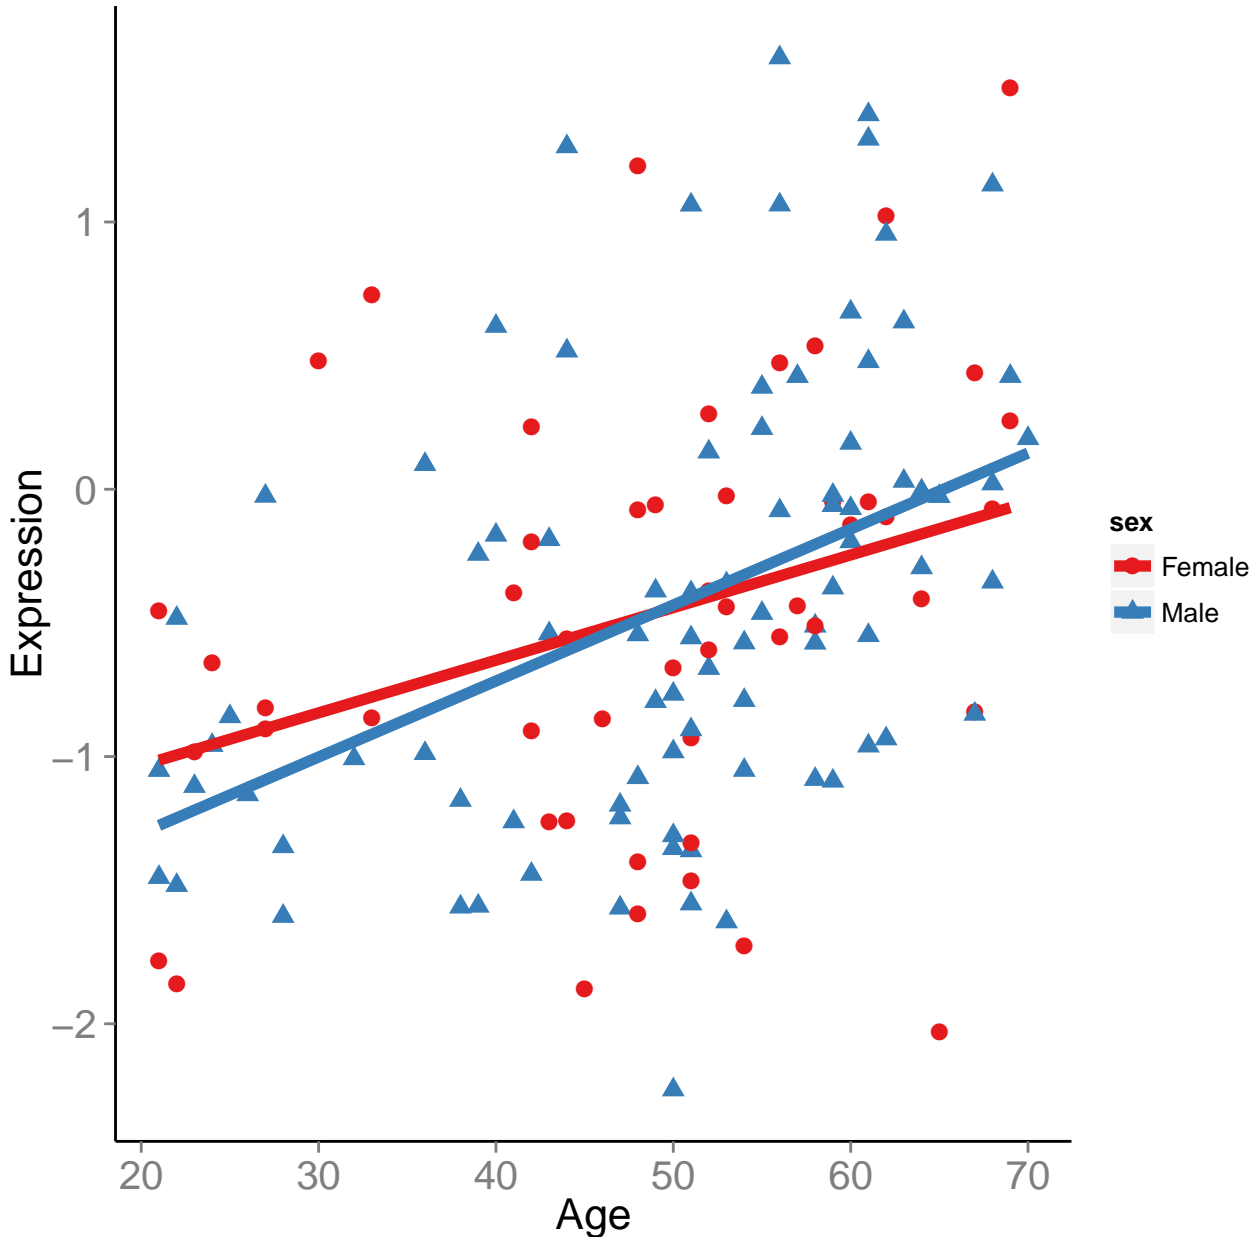

Muscle: FGGY Pearson-R=0.40 Pval=1.29E-06

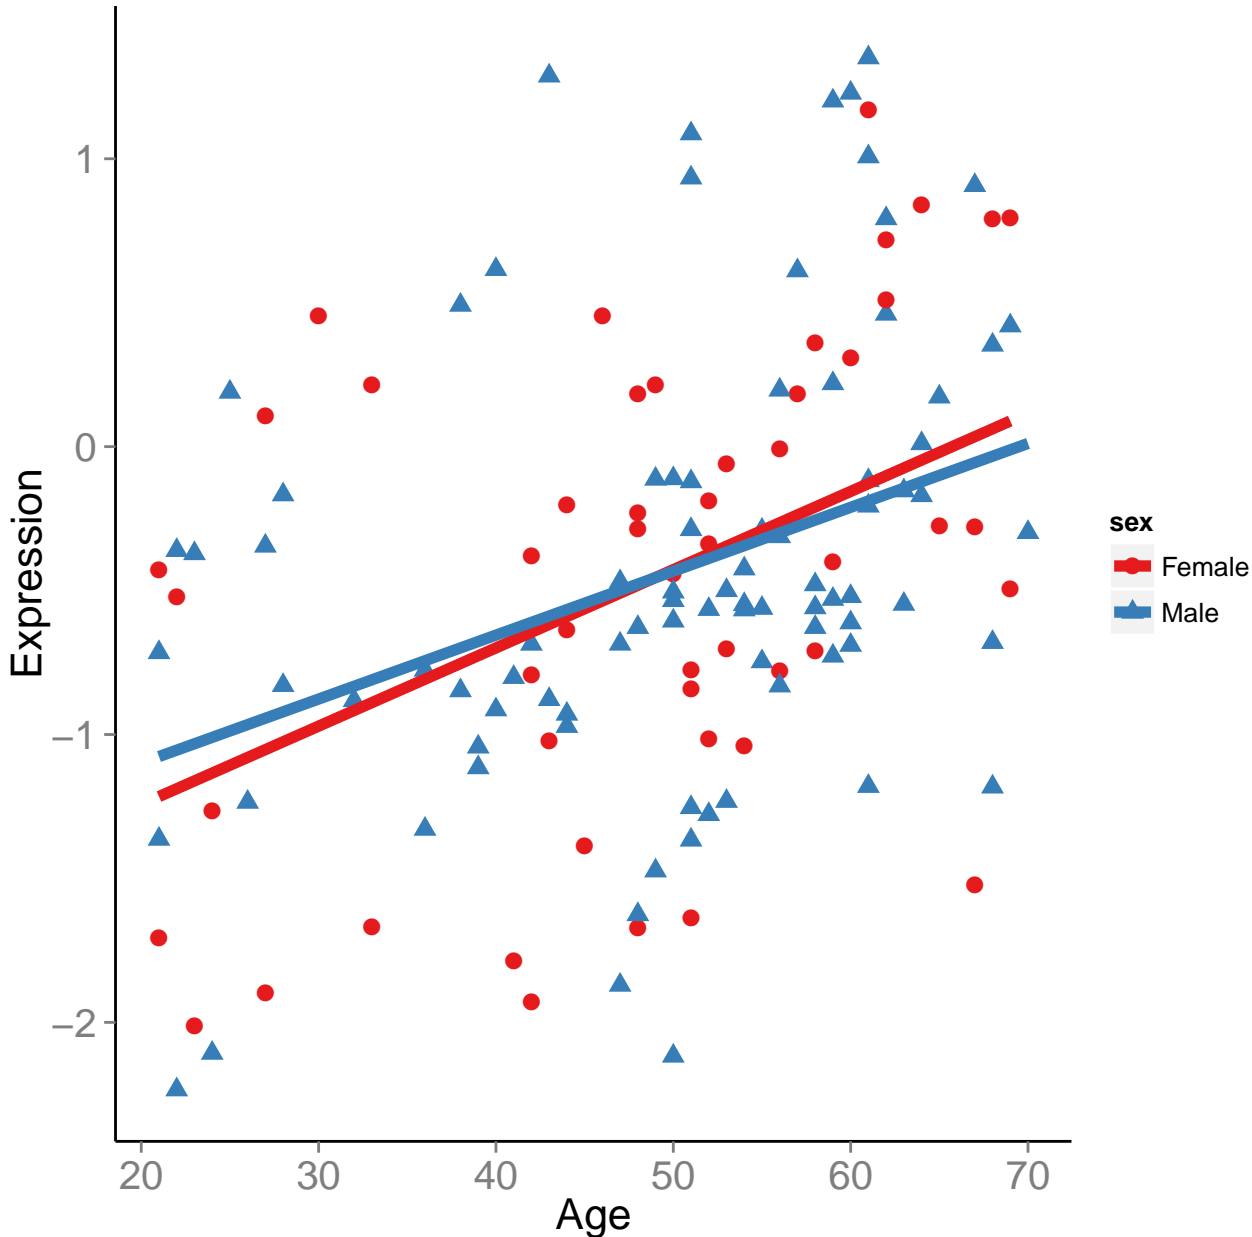

Muscle: VPS16 Pearson-R=0.40 Pval=1.33E-06

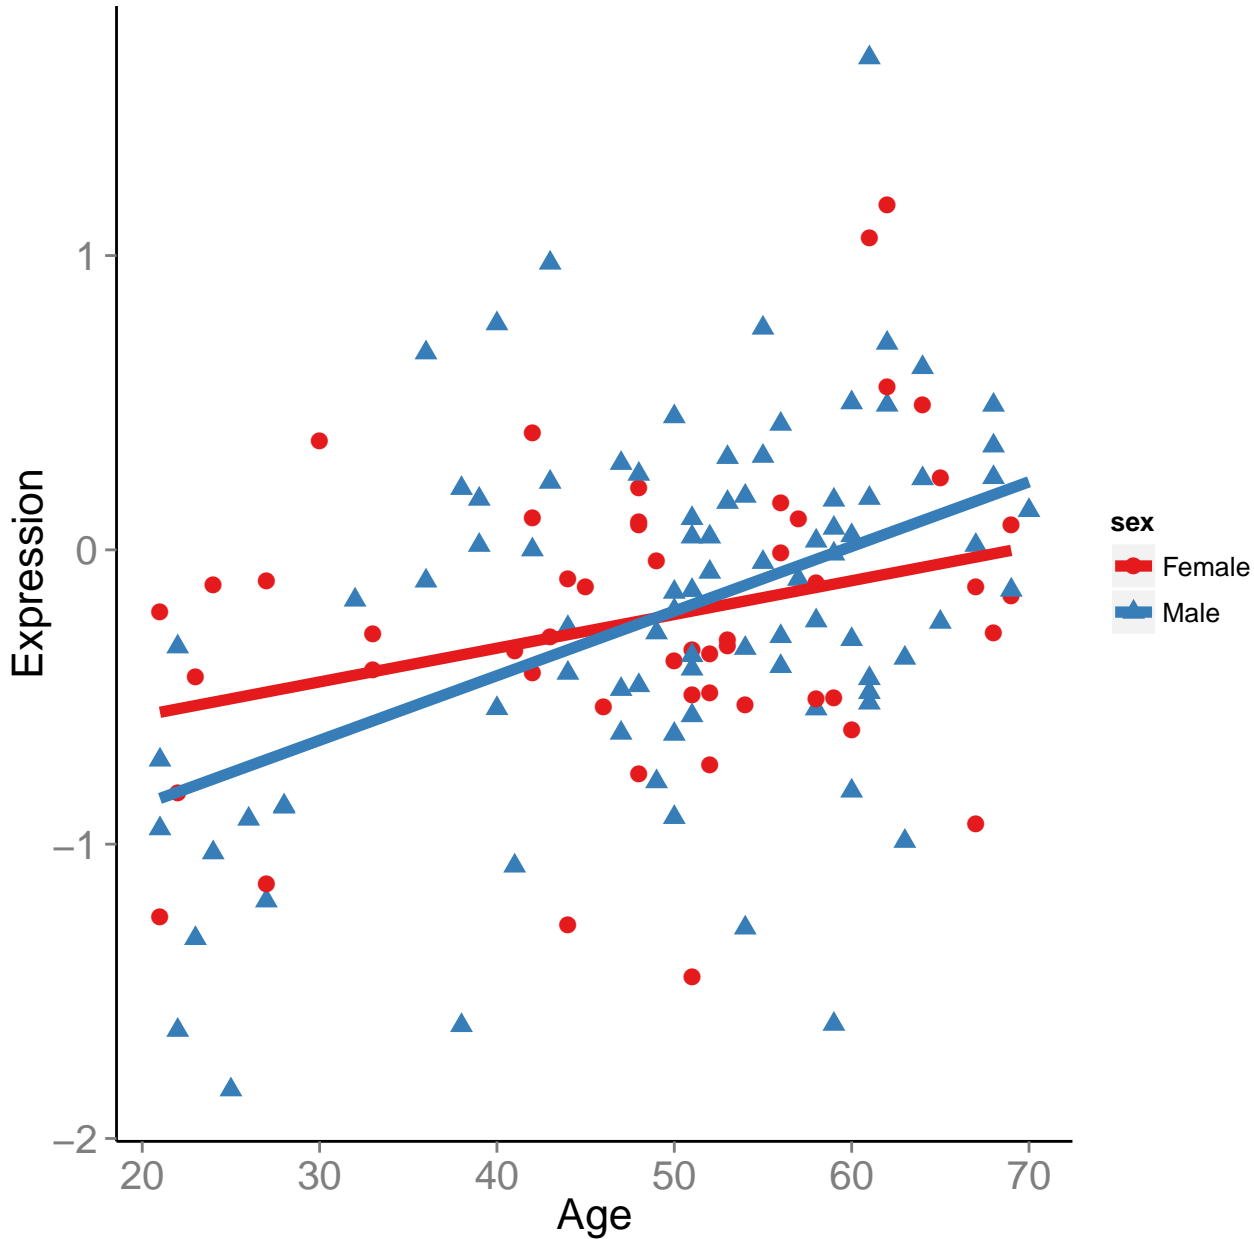

Muscle: CTC-338M12.5 Pearson-R=0.40 Pval=1.35E-06

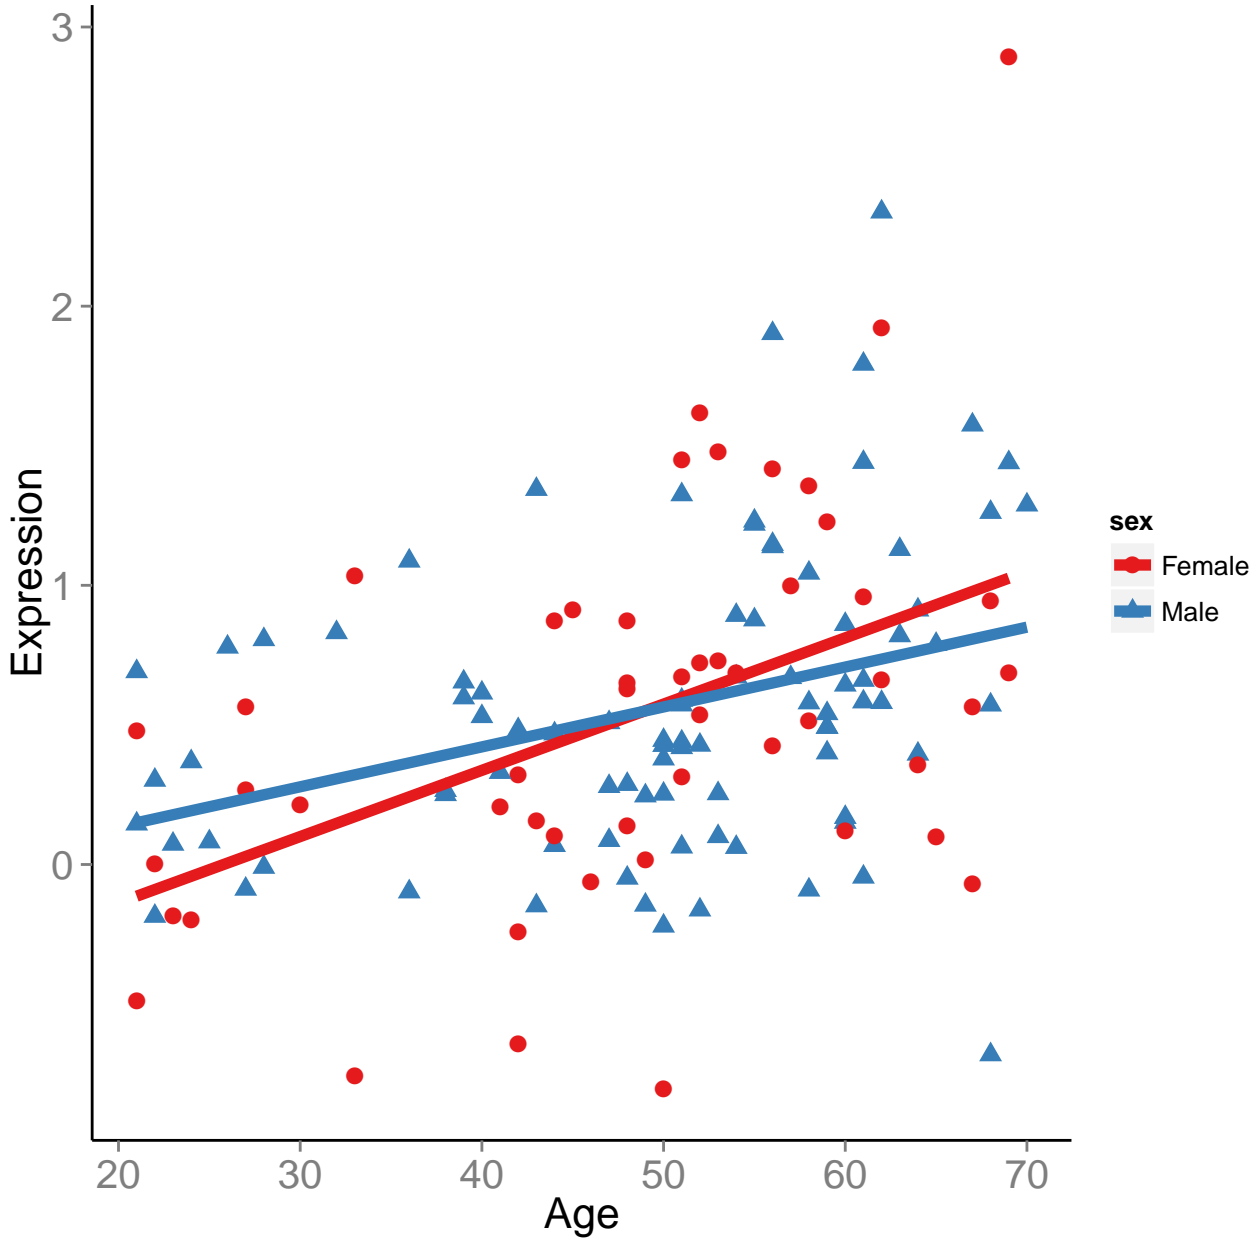



Muscle: QTRT1 Pearson-R=0.40 Pval=1.51E-06

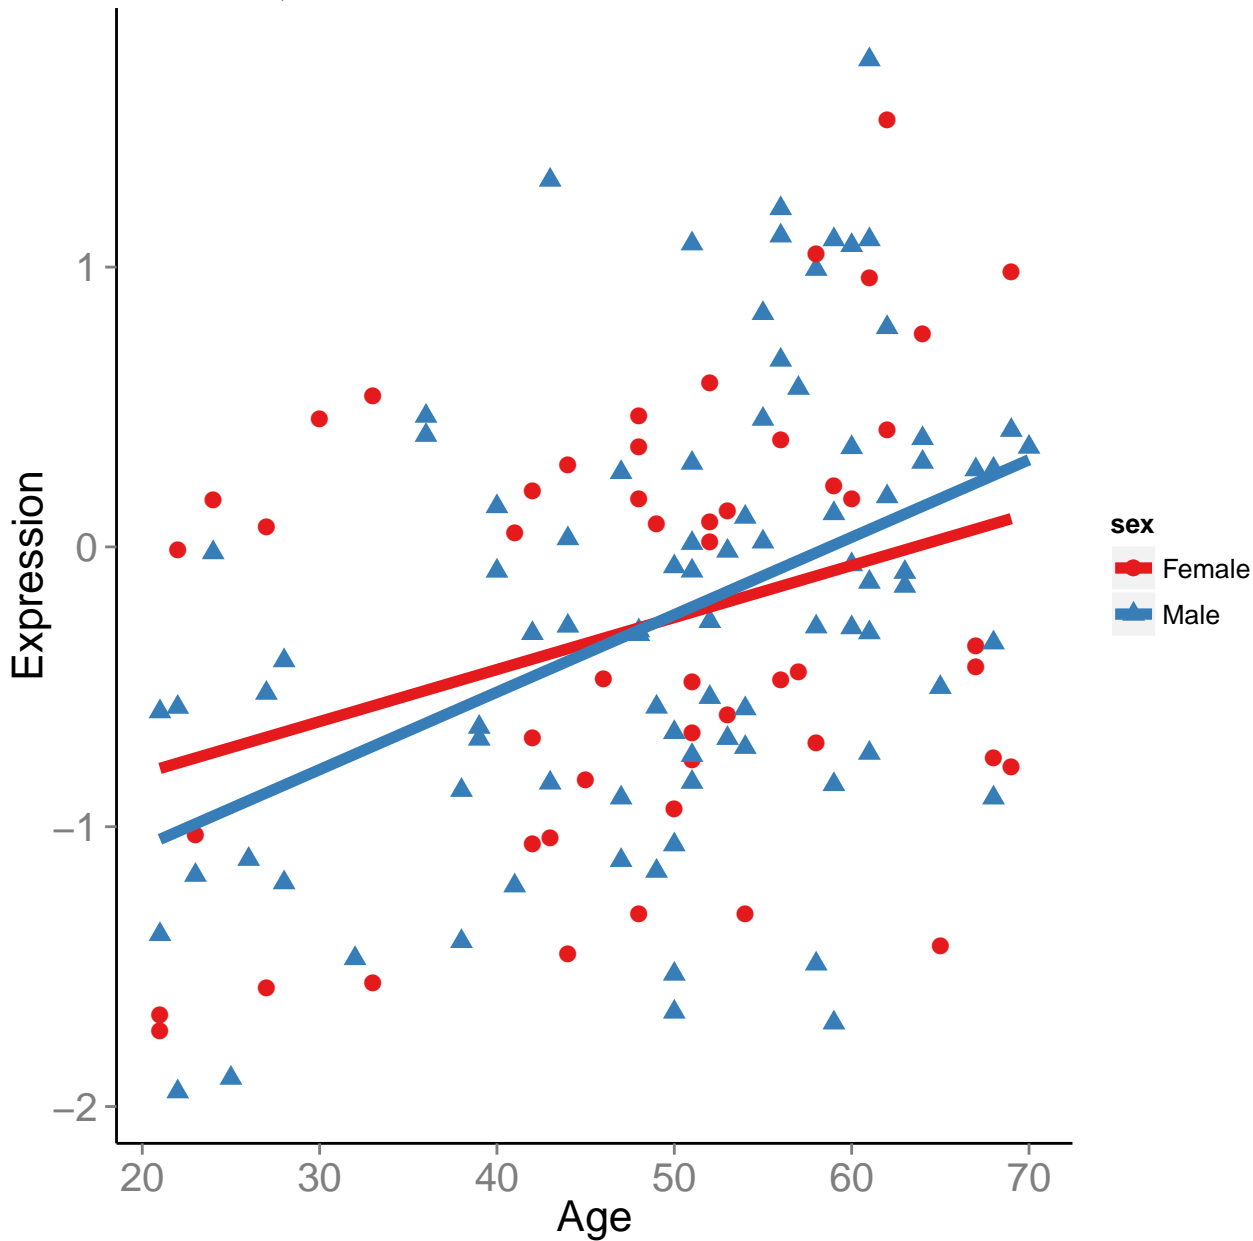

Muscle: COL19A1 Pearson-R=0.40 Pval=1.50E-06

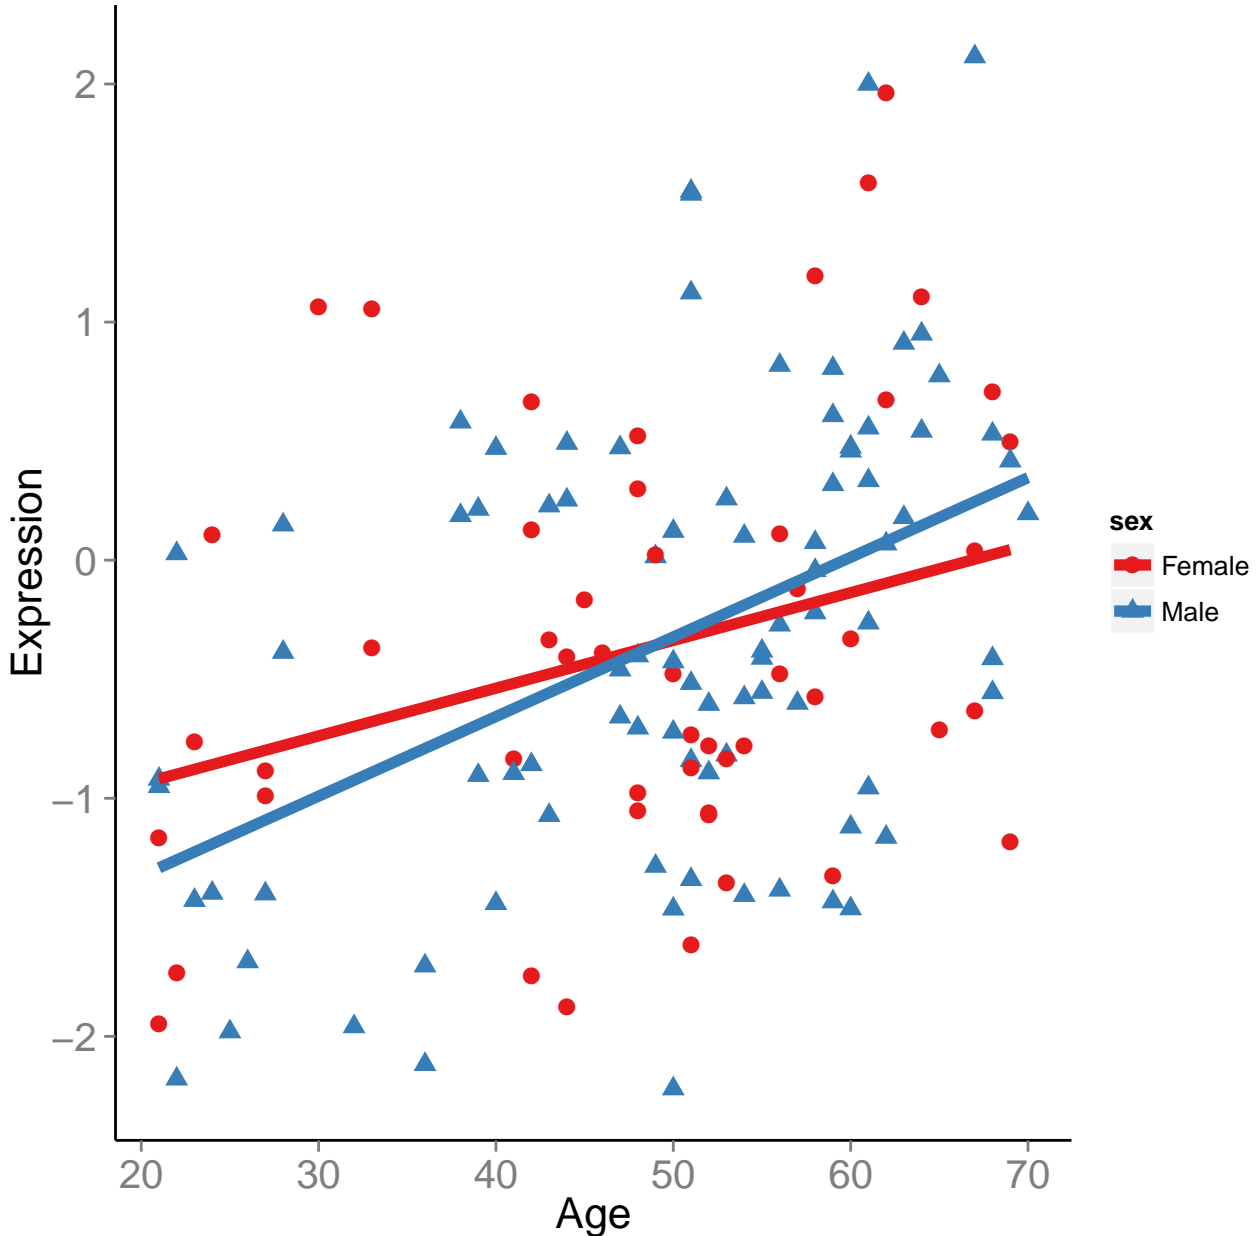

Muscle: BZRAP1 Pearson-R=0.40 Pval=1.58E-06

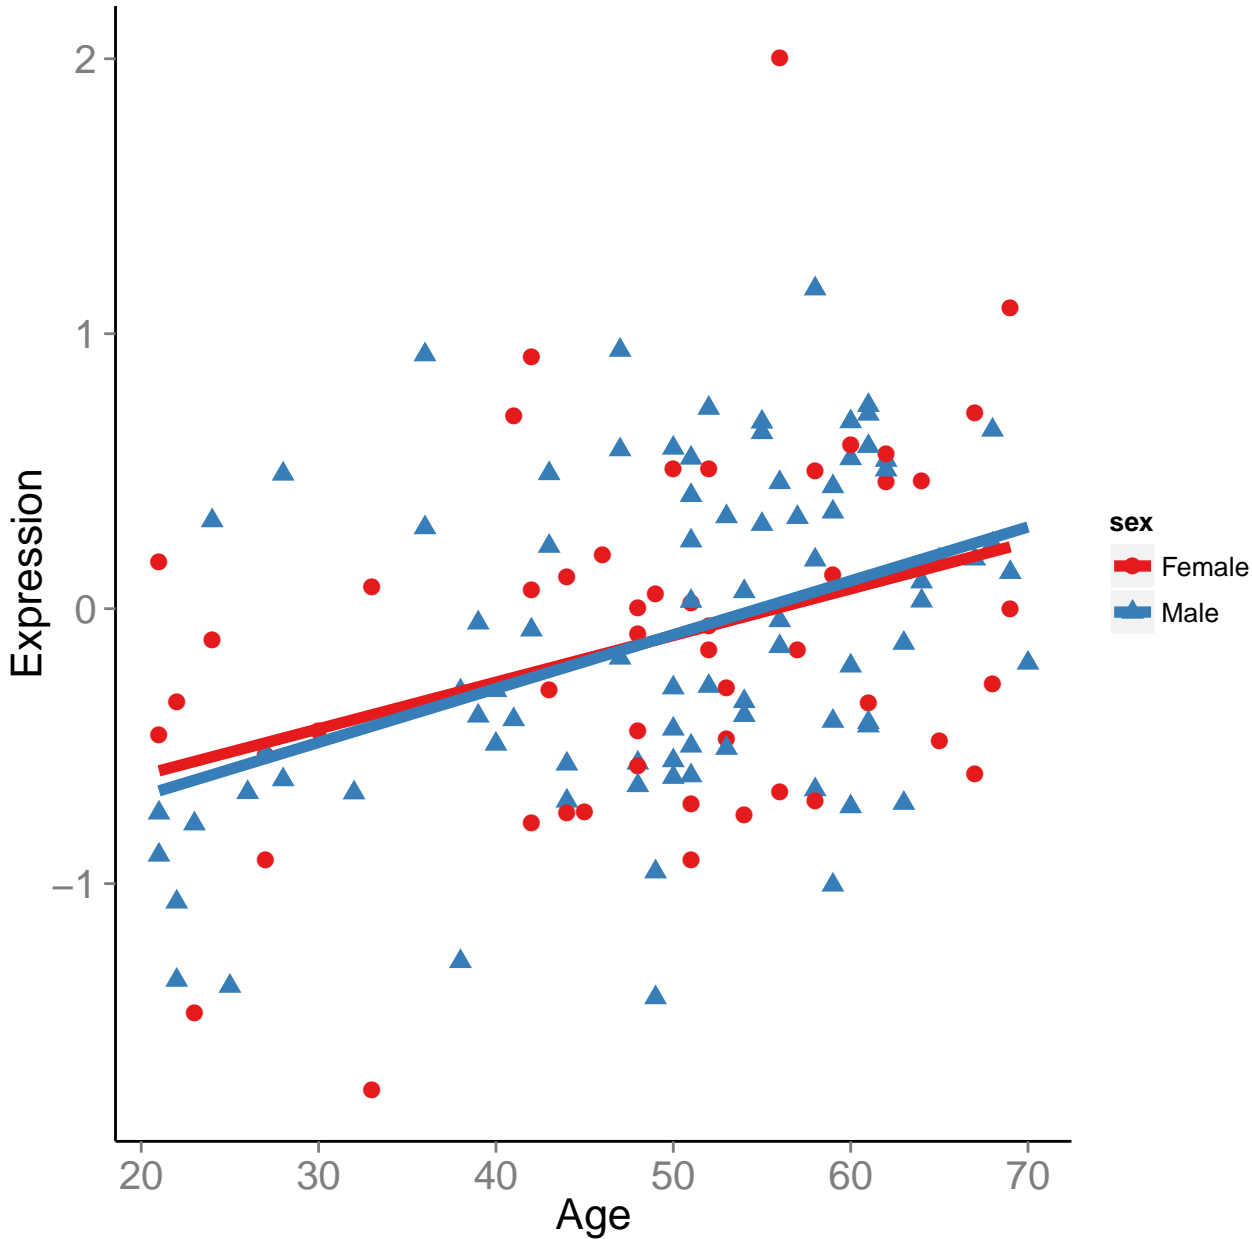

Muscle: ANKFY1 Pearson-R=0.40 Pval=1.59E-06

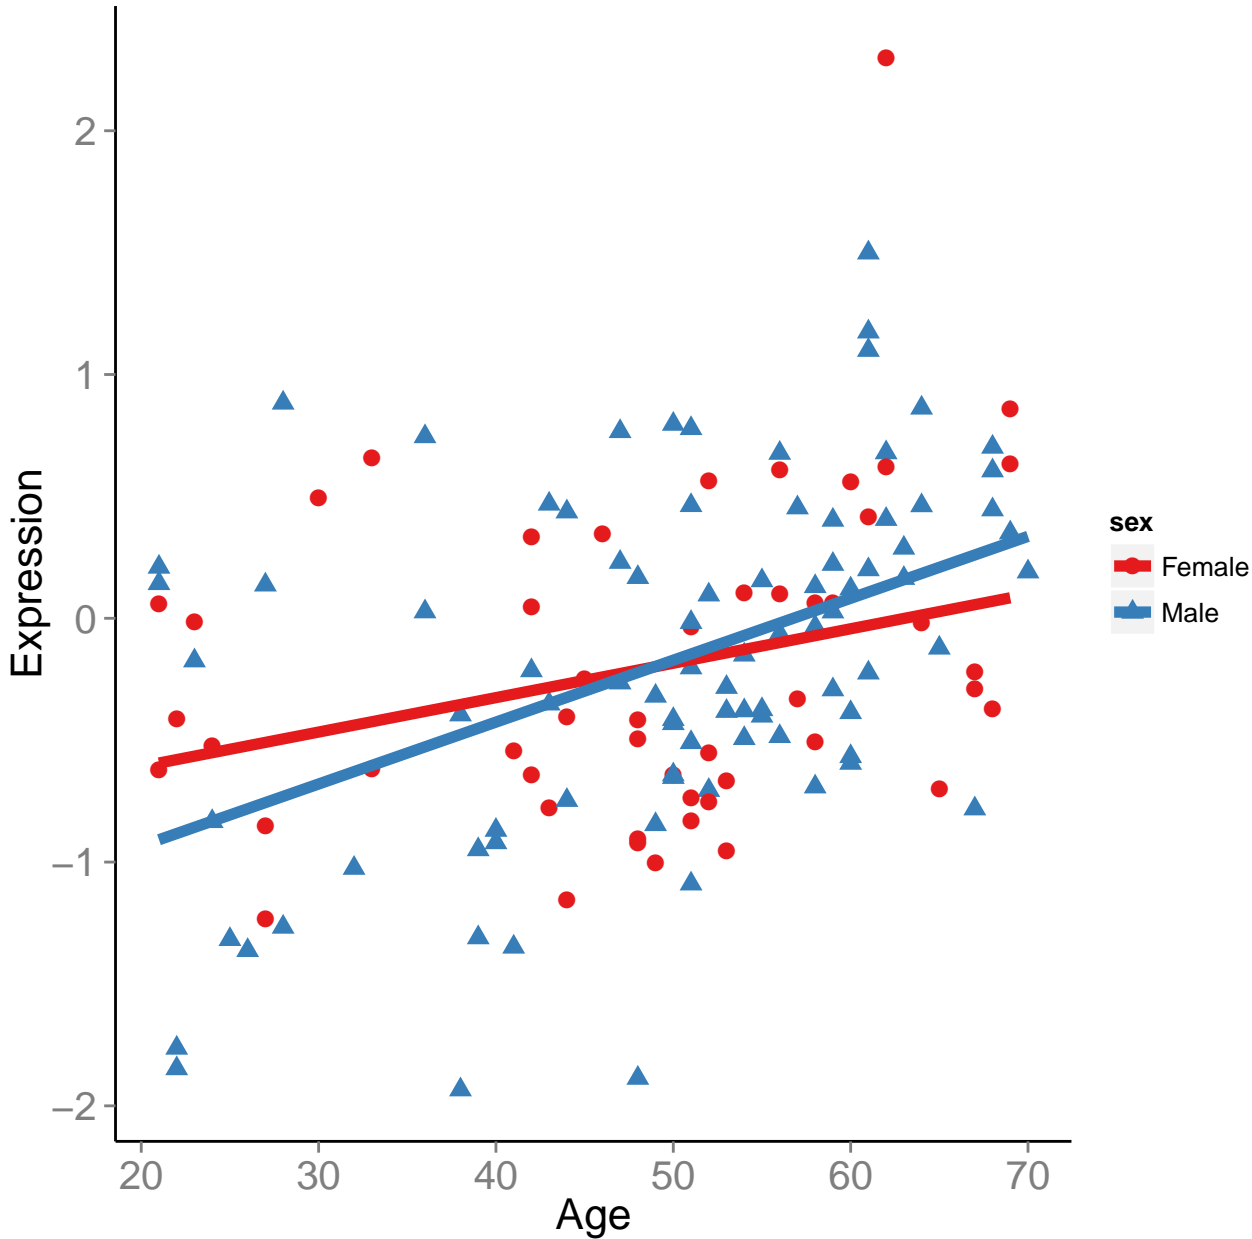

Muscle: RP11-296L22.4 Pearson-R=0.40 Pval=1.59E-06

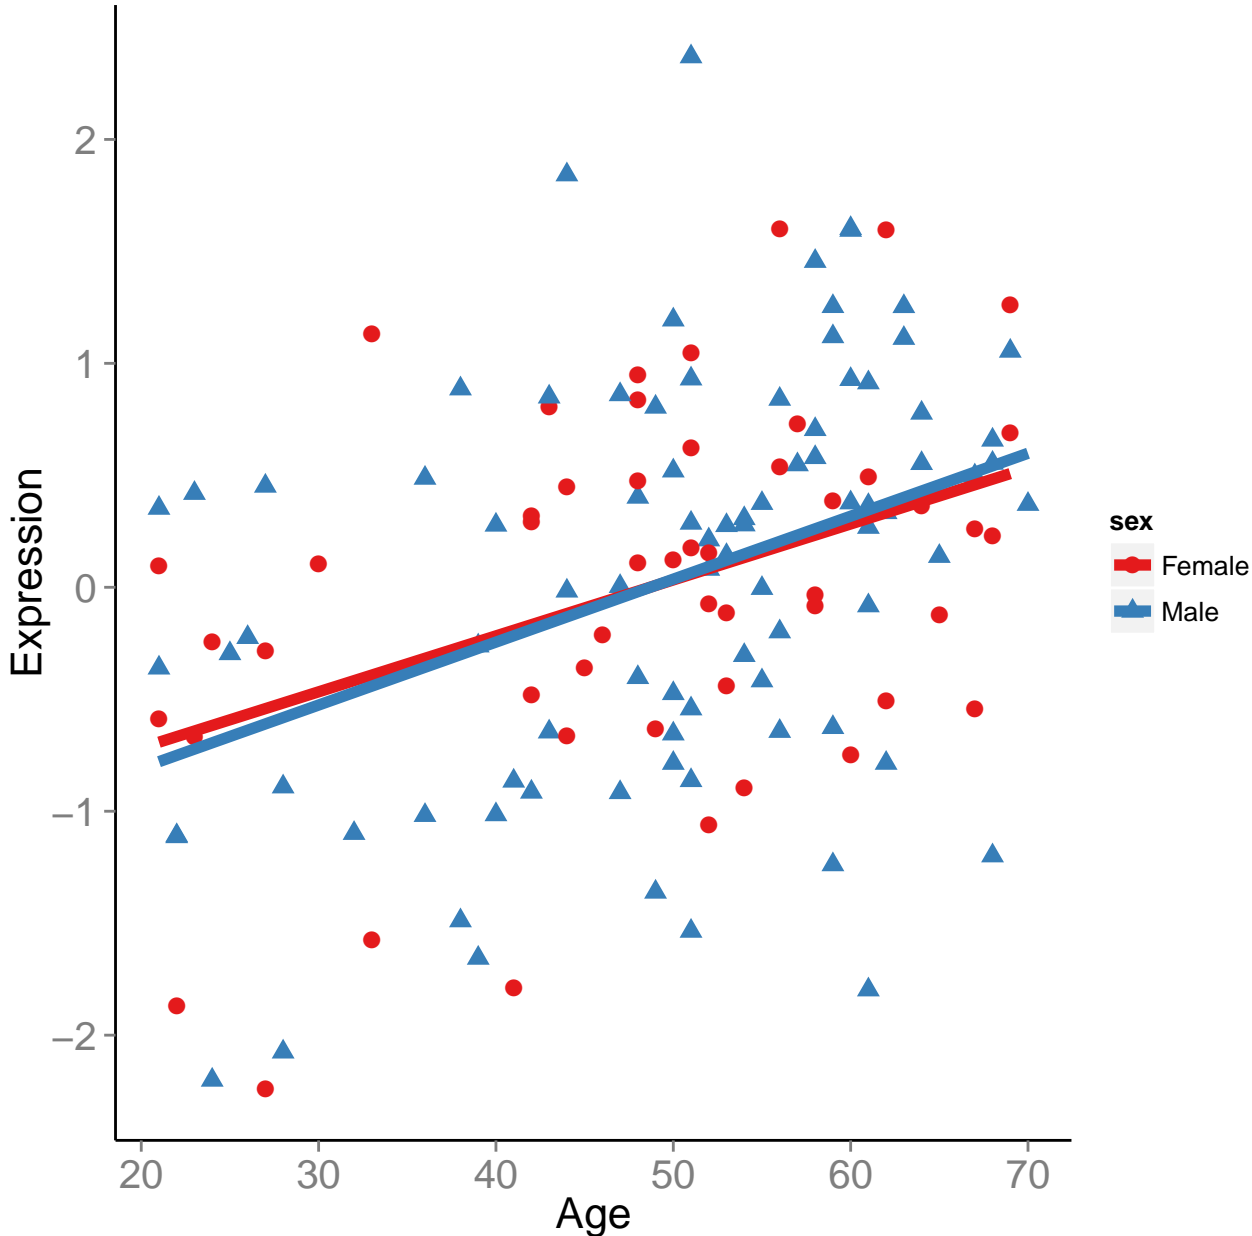

Muscle: PRPF40B Pearson-R=0.39 Pval=1.79E-06

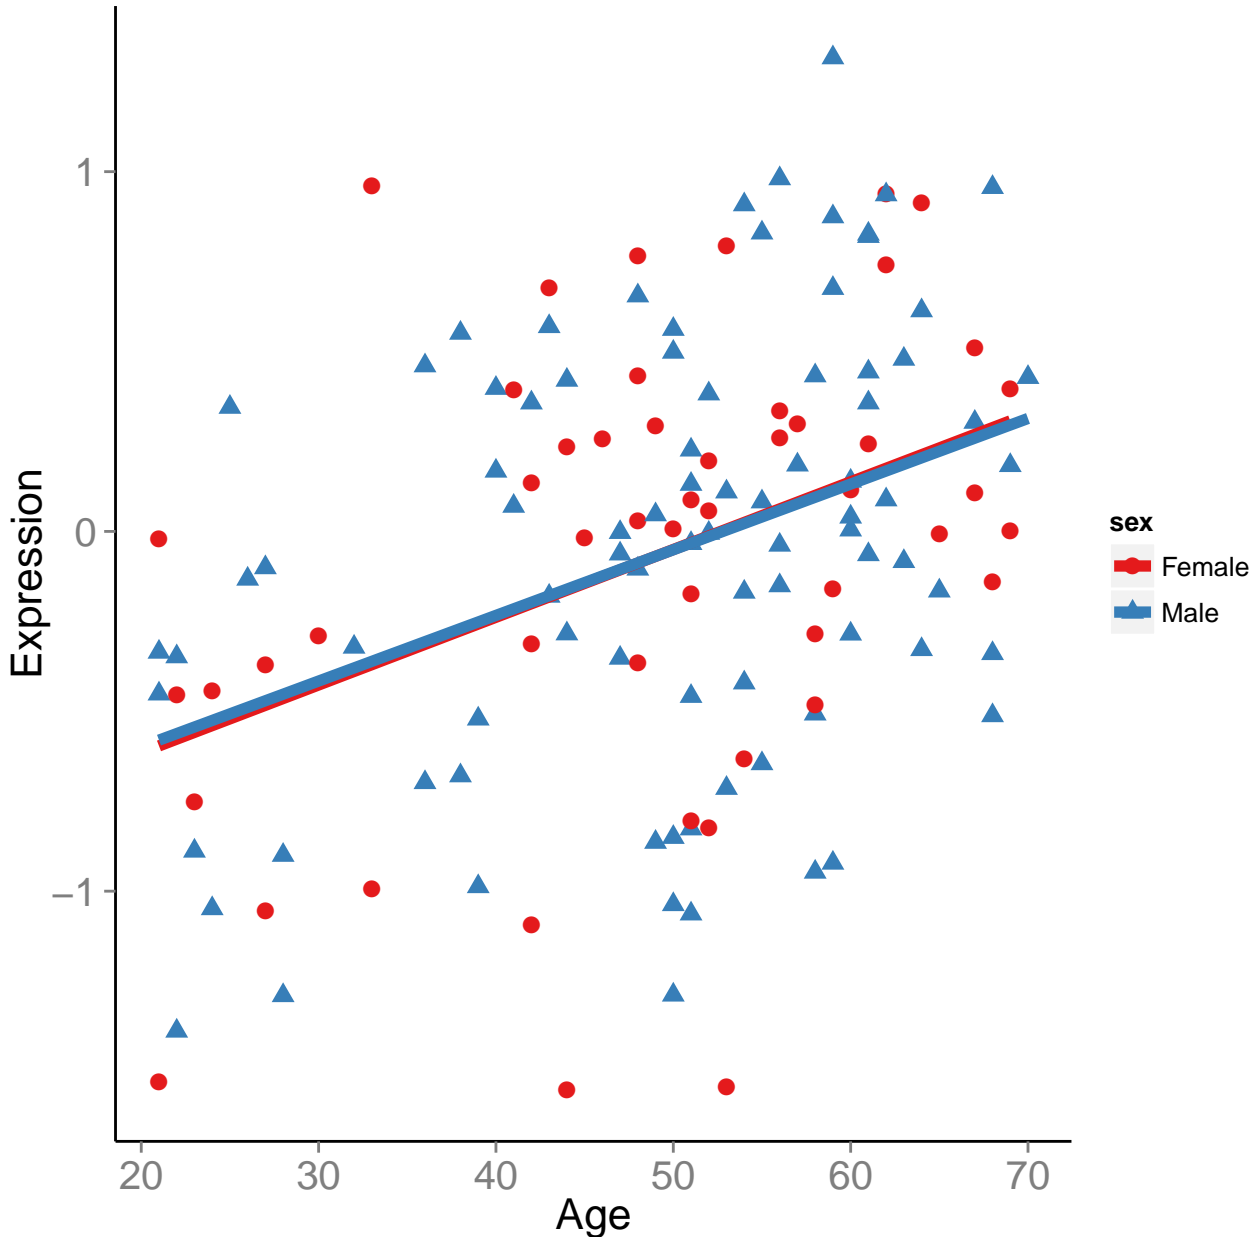

Muscle: KLF13 Pearson-R=0.39 Pval=1.89E-06

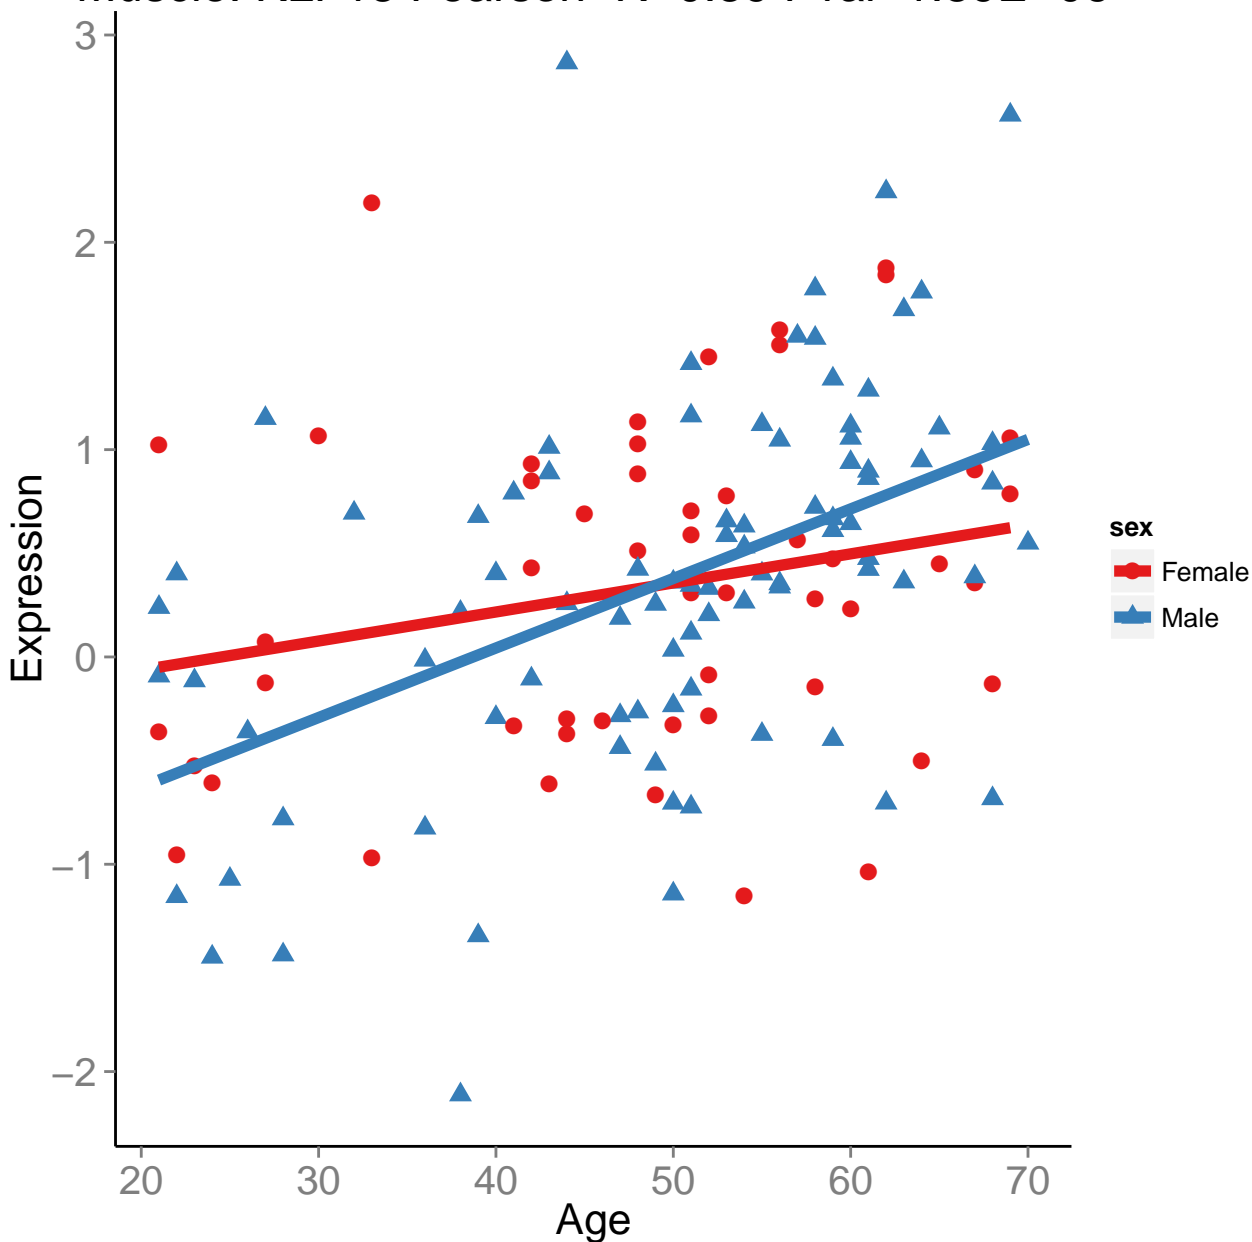

Muscle: METTL19 Pearson-R=0.39 Pval=1.92E-06

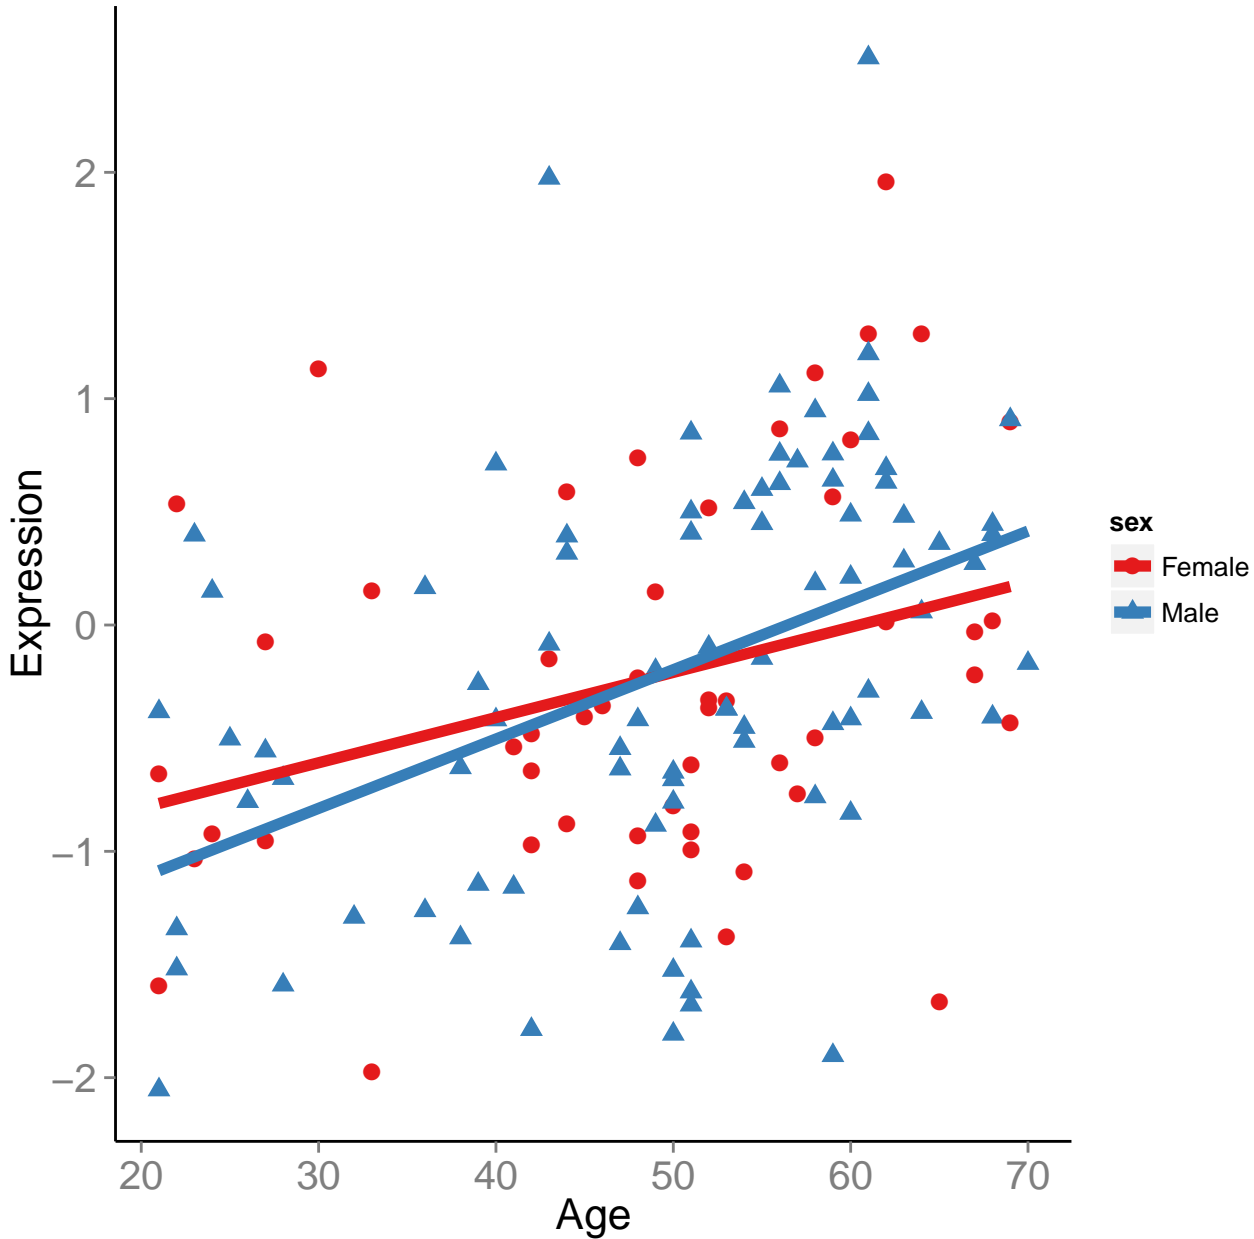



Muscle: POLDIP3 Pearson-R=0.39 Pval=1.96E-06

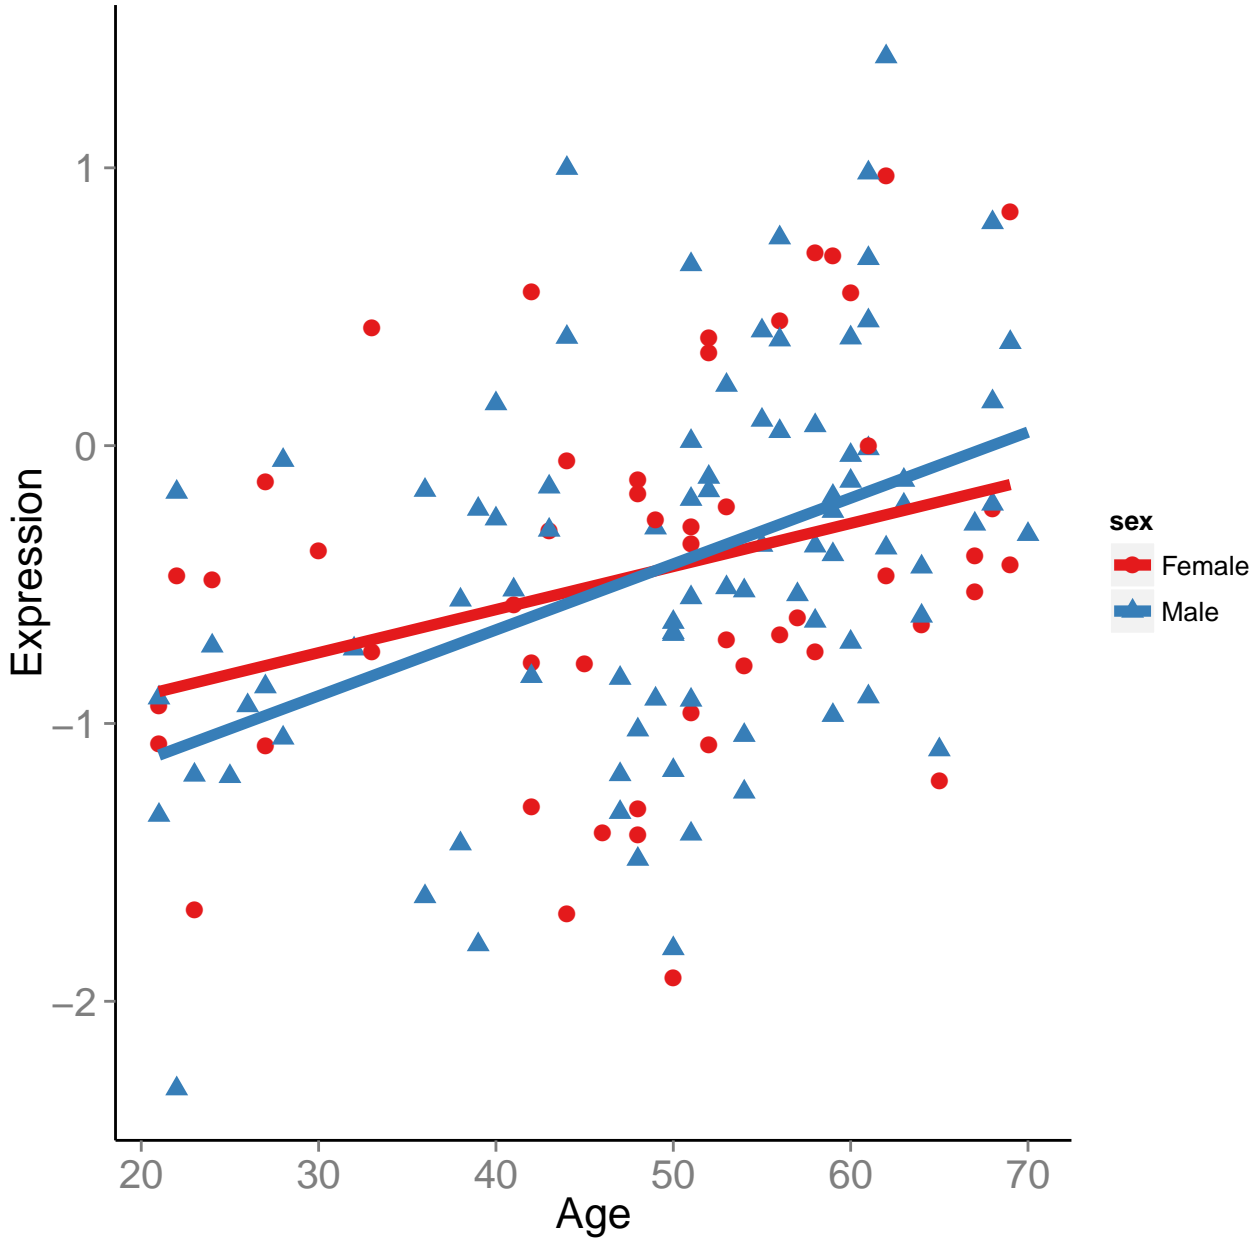

Muscle: THOC3 Pearson-R=0.39 Pval=2.01E-06

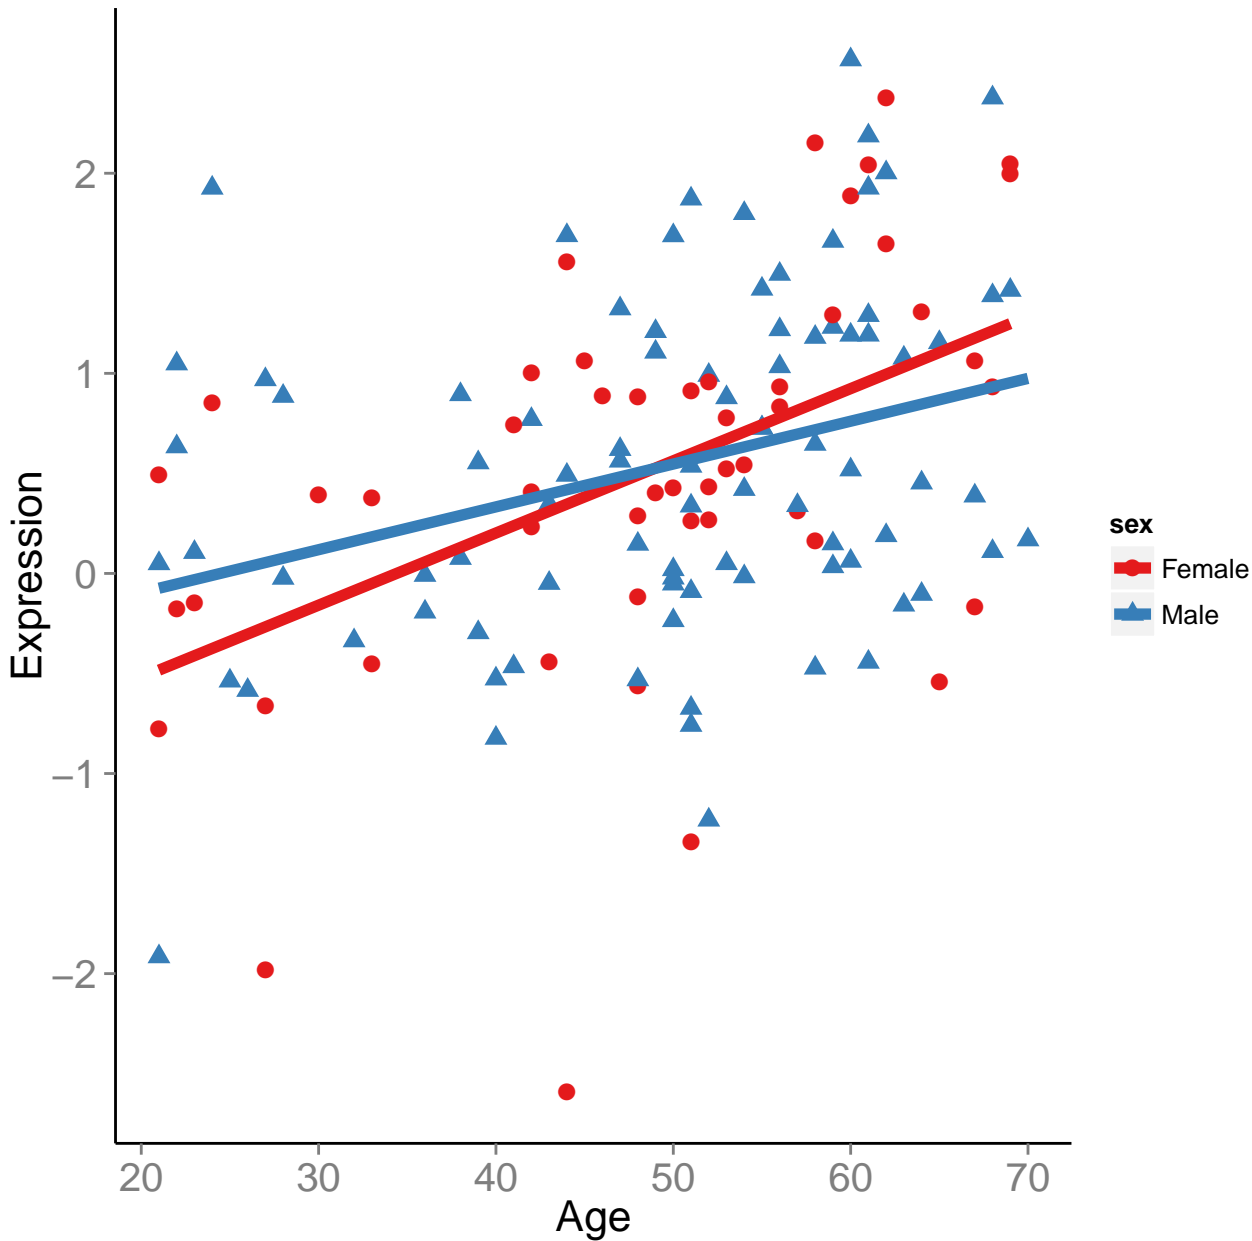

Muscle: AMY2B Pearson-R=0.39 Pval=2.01E-06

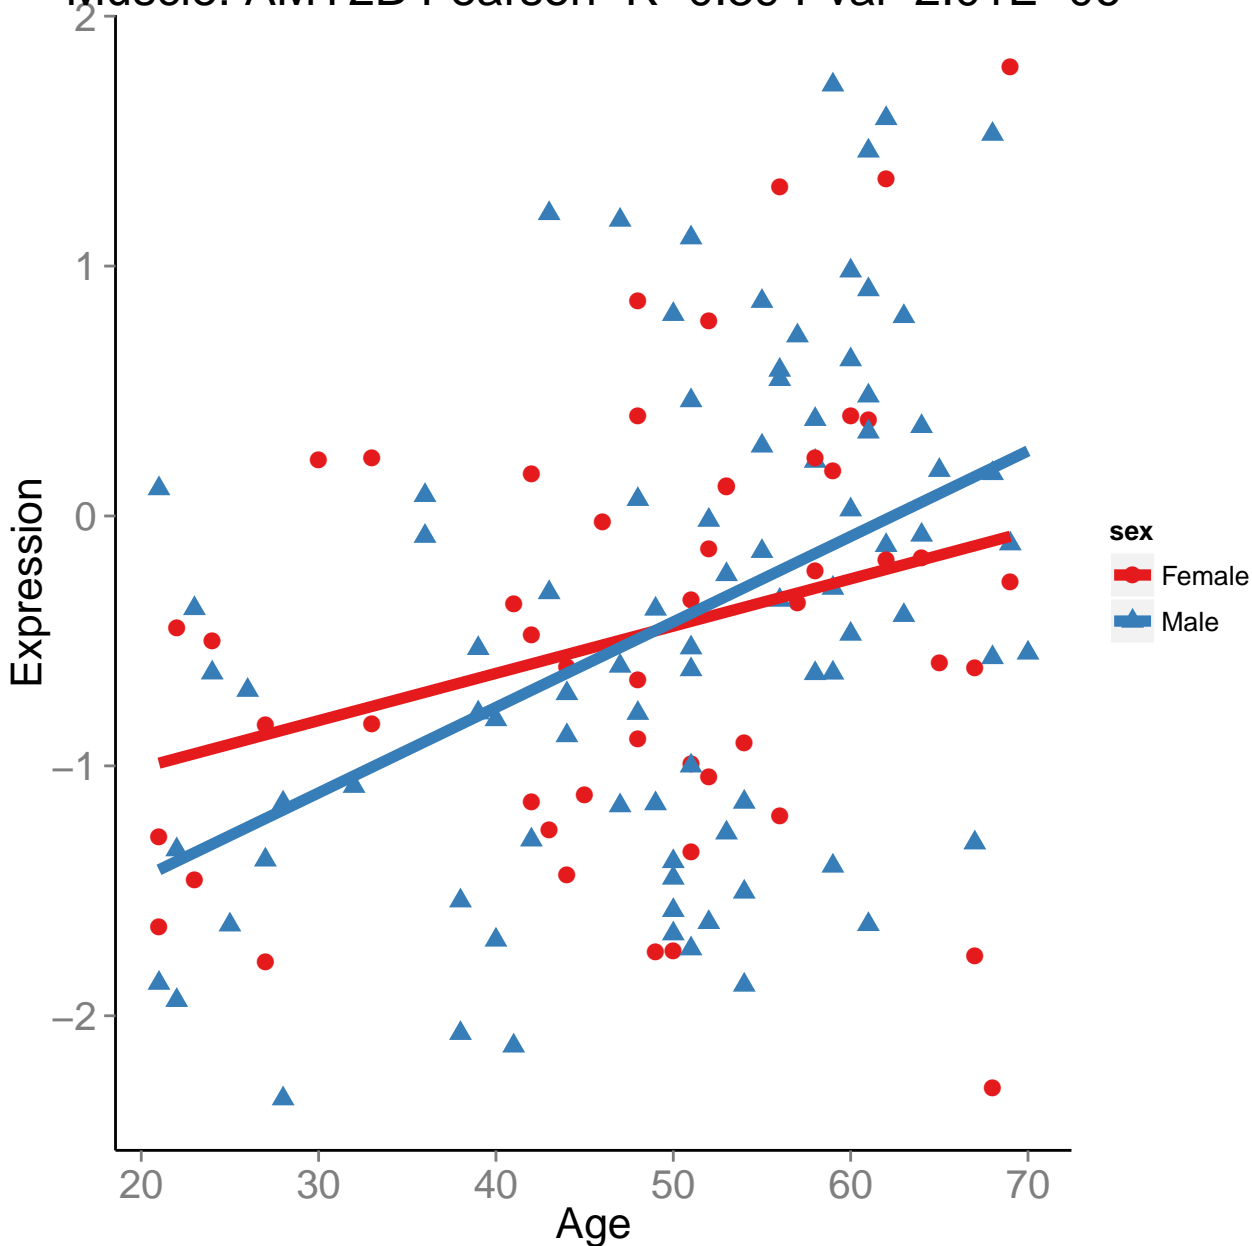

Muscle: MYH8 Pearson-R=0.39 Pval=2.05E-06

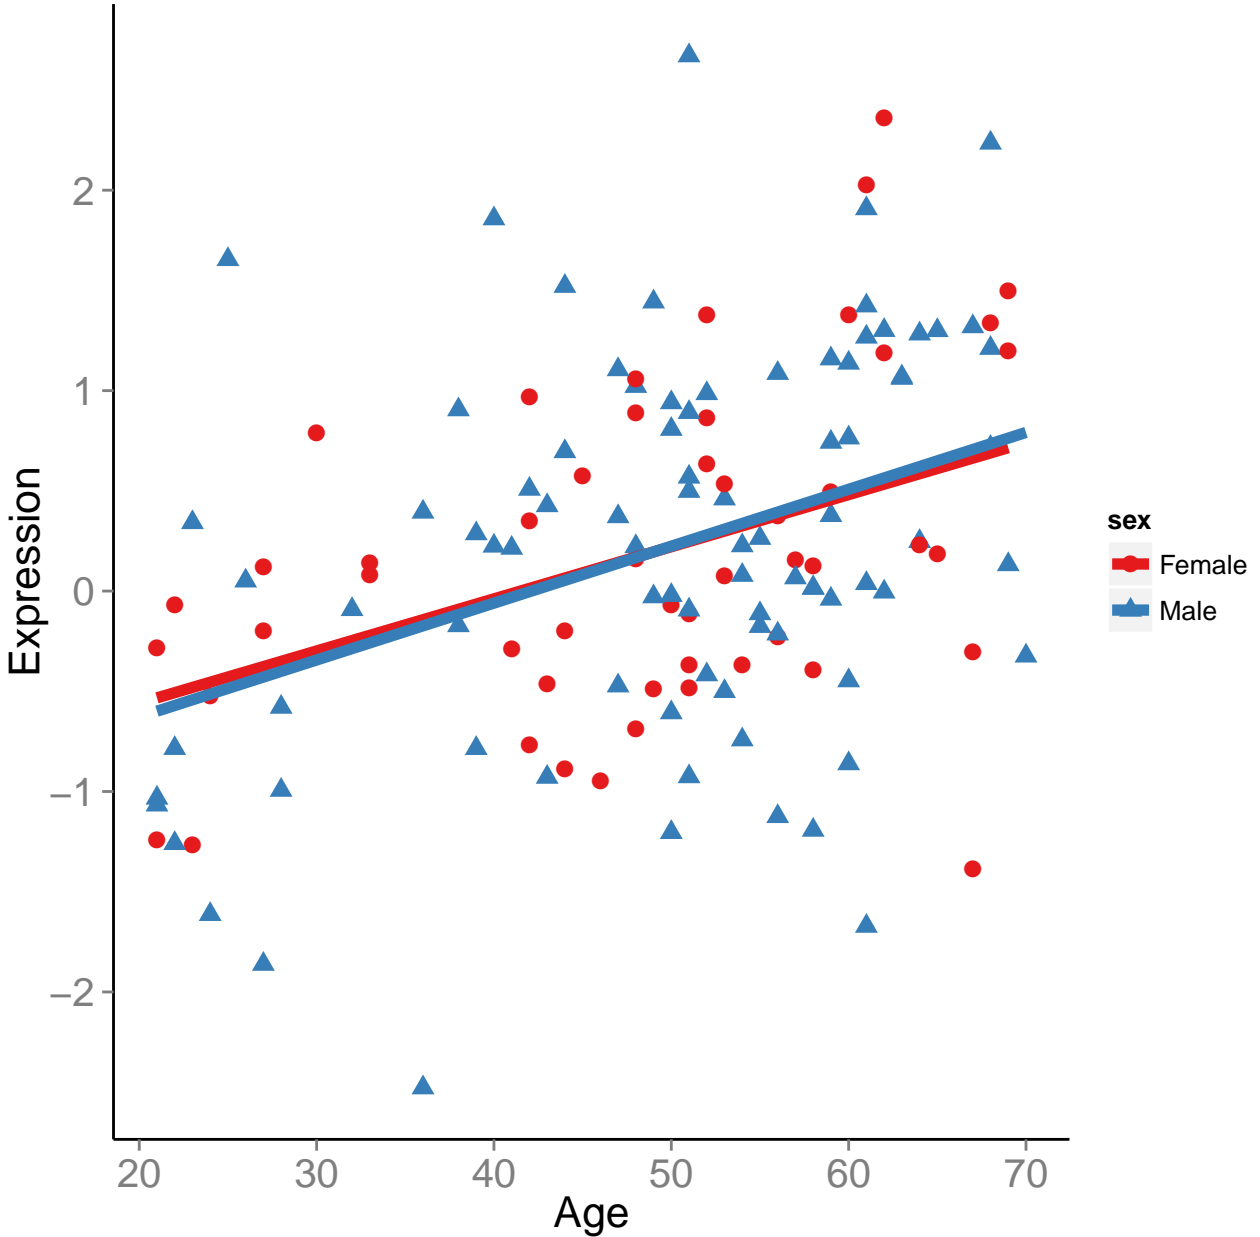

Muscle: NUP98 Pearson-R=0.39 Pval=2.09E-06

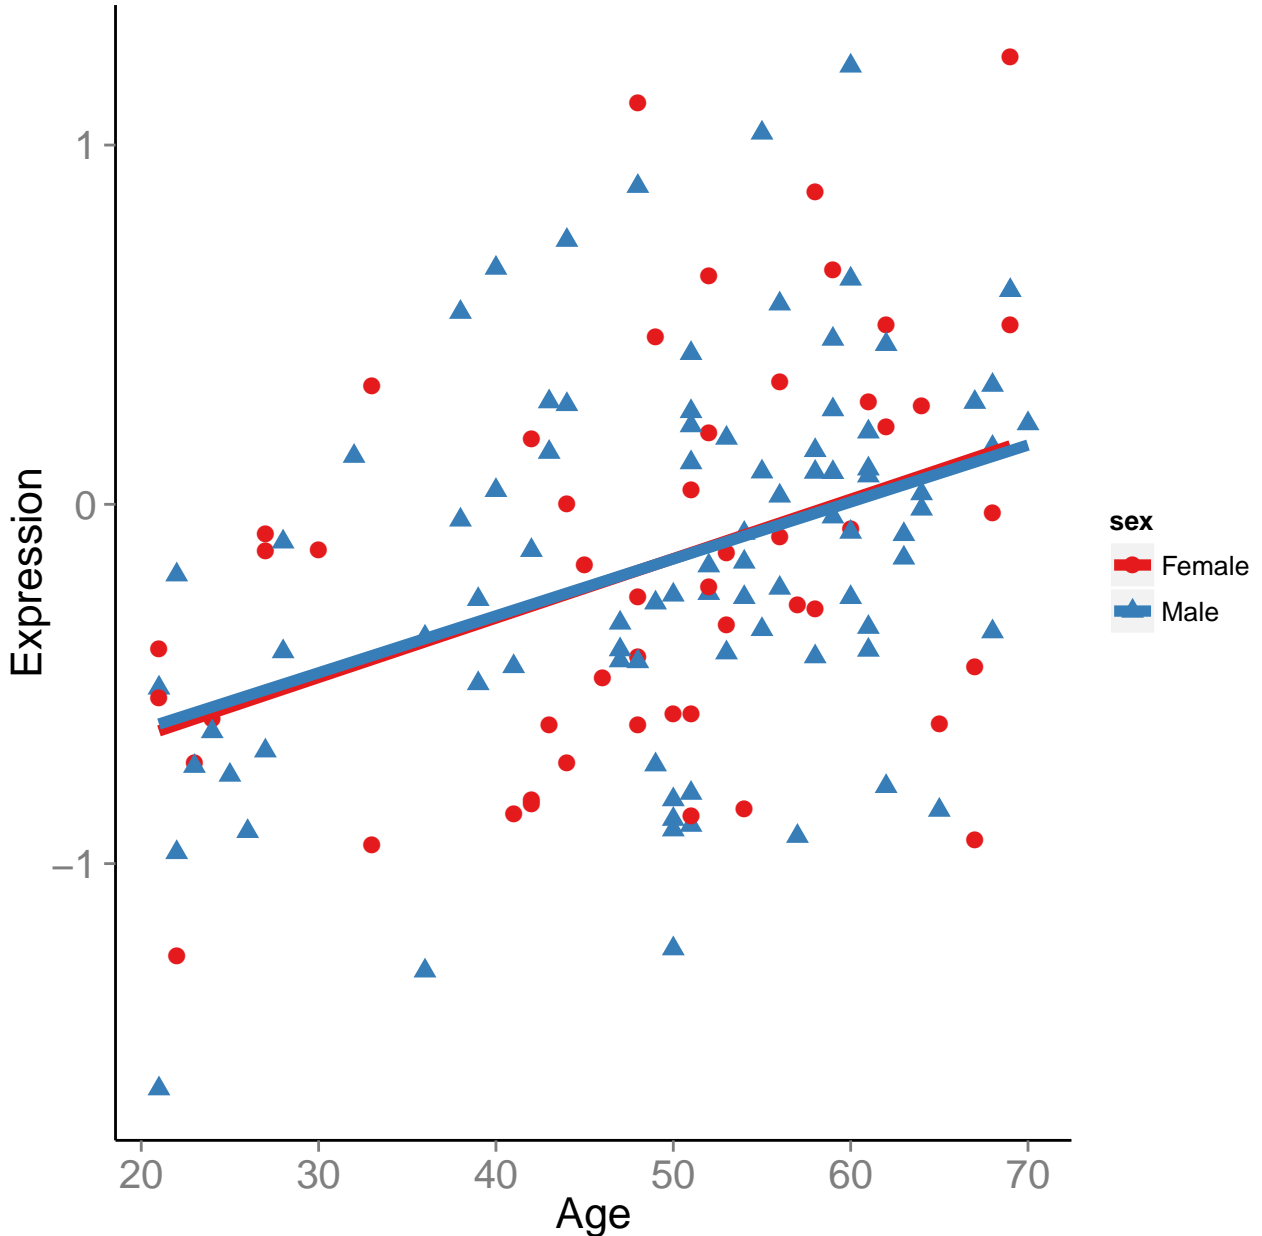

Muscle: EFCAB7 Pearson-R=0.39 Pval=2.14E-06

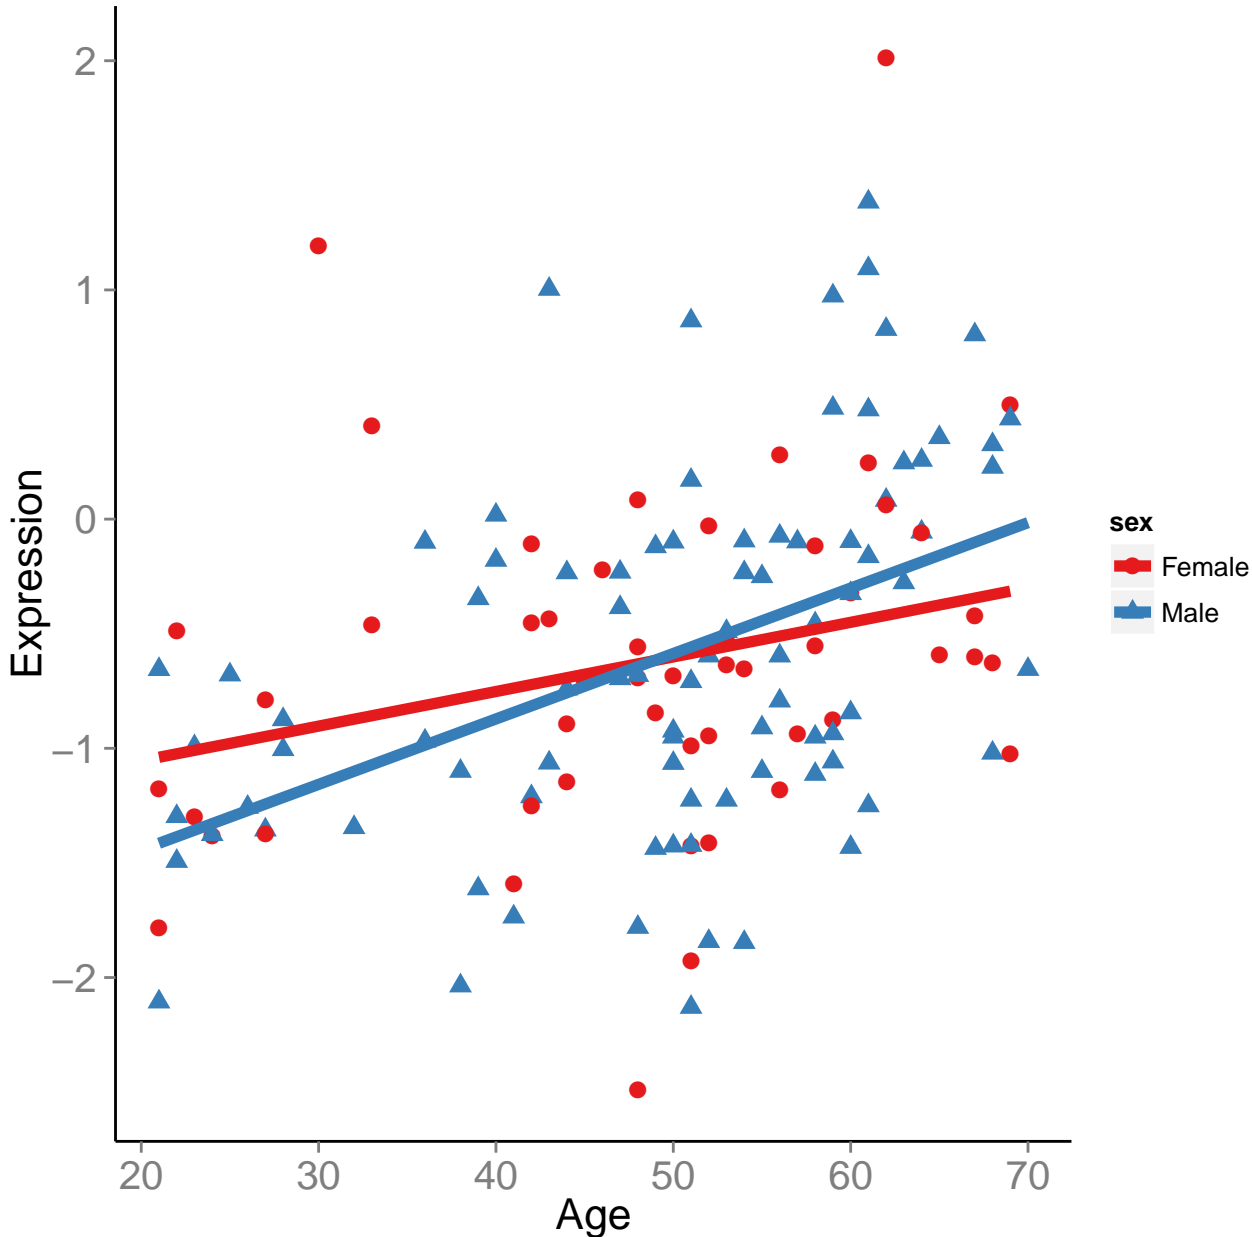

Muscle: FAM127A Pearson-R=0.39 Pval=2.18E-06

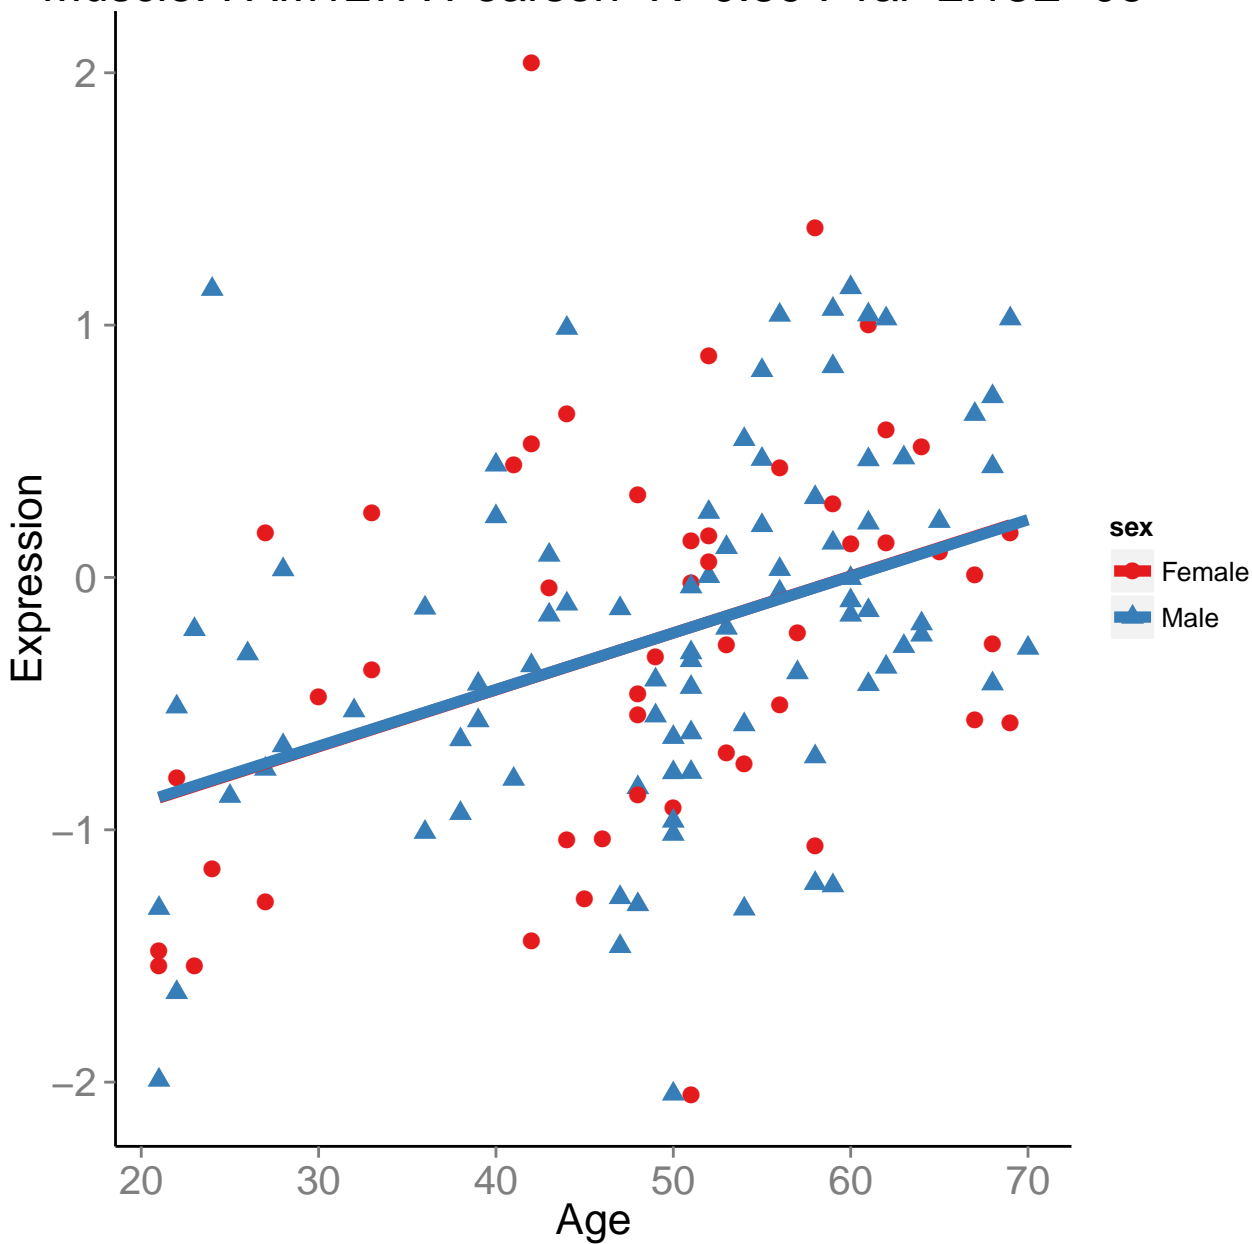

Muscle: C12orf51 Pearson-R=0.39 Pval=2.31E-06

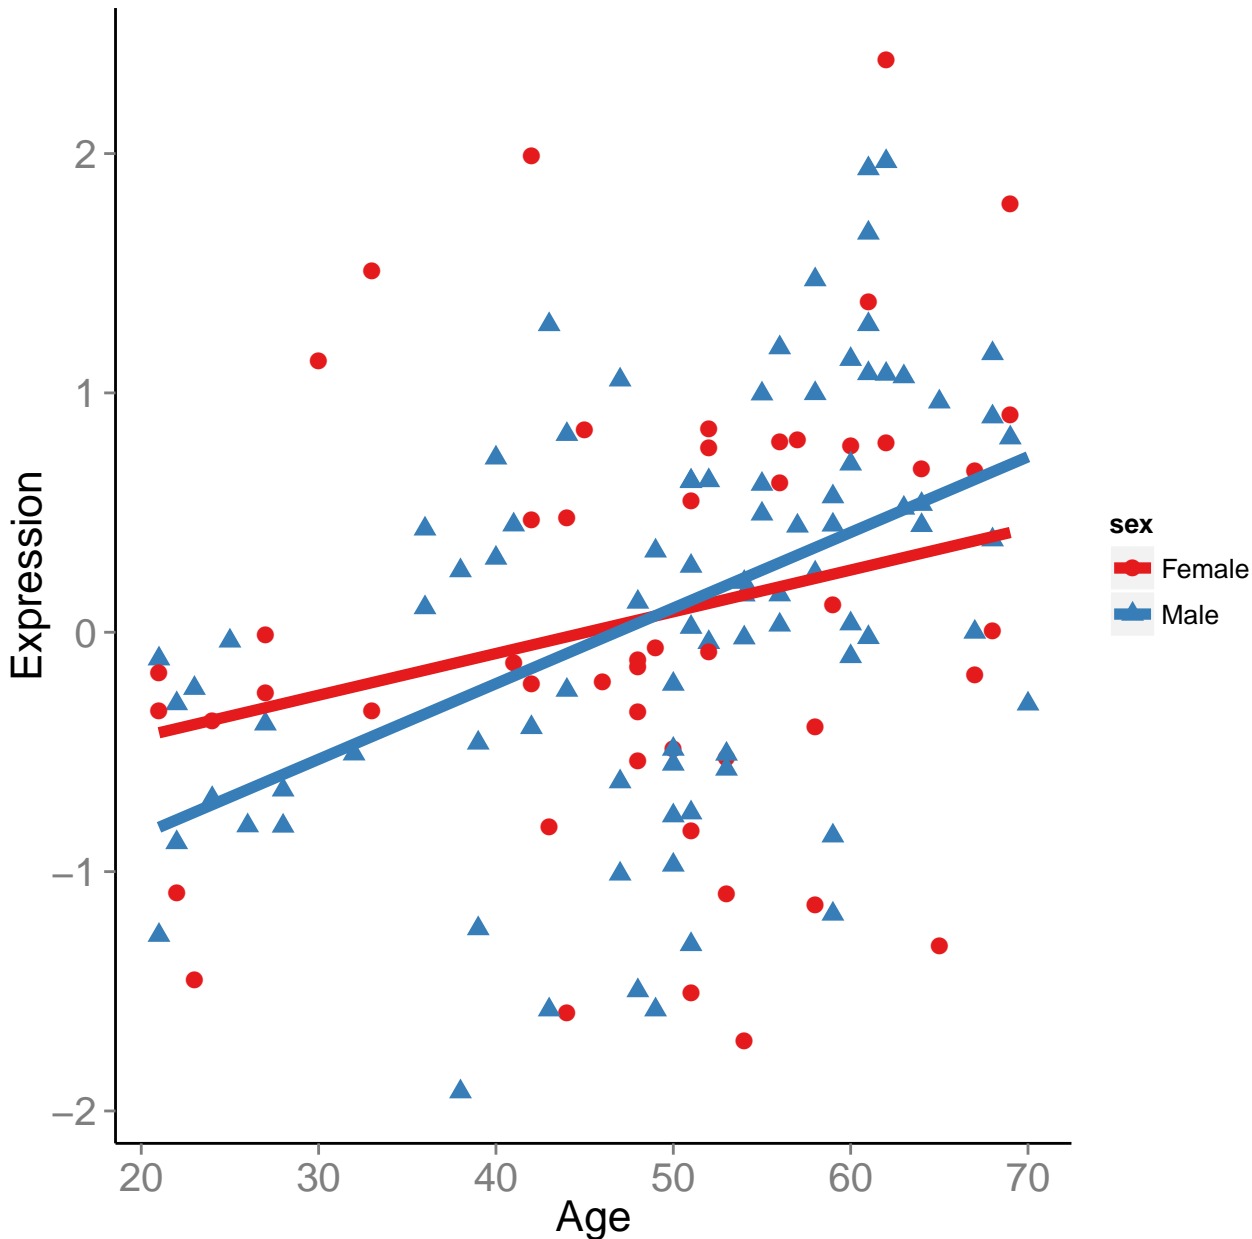



Muscle: NPR3 Pearson-R=-0.39 Pval=2.43E-06

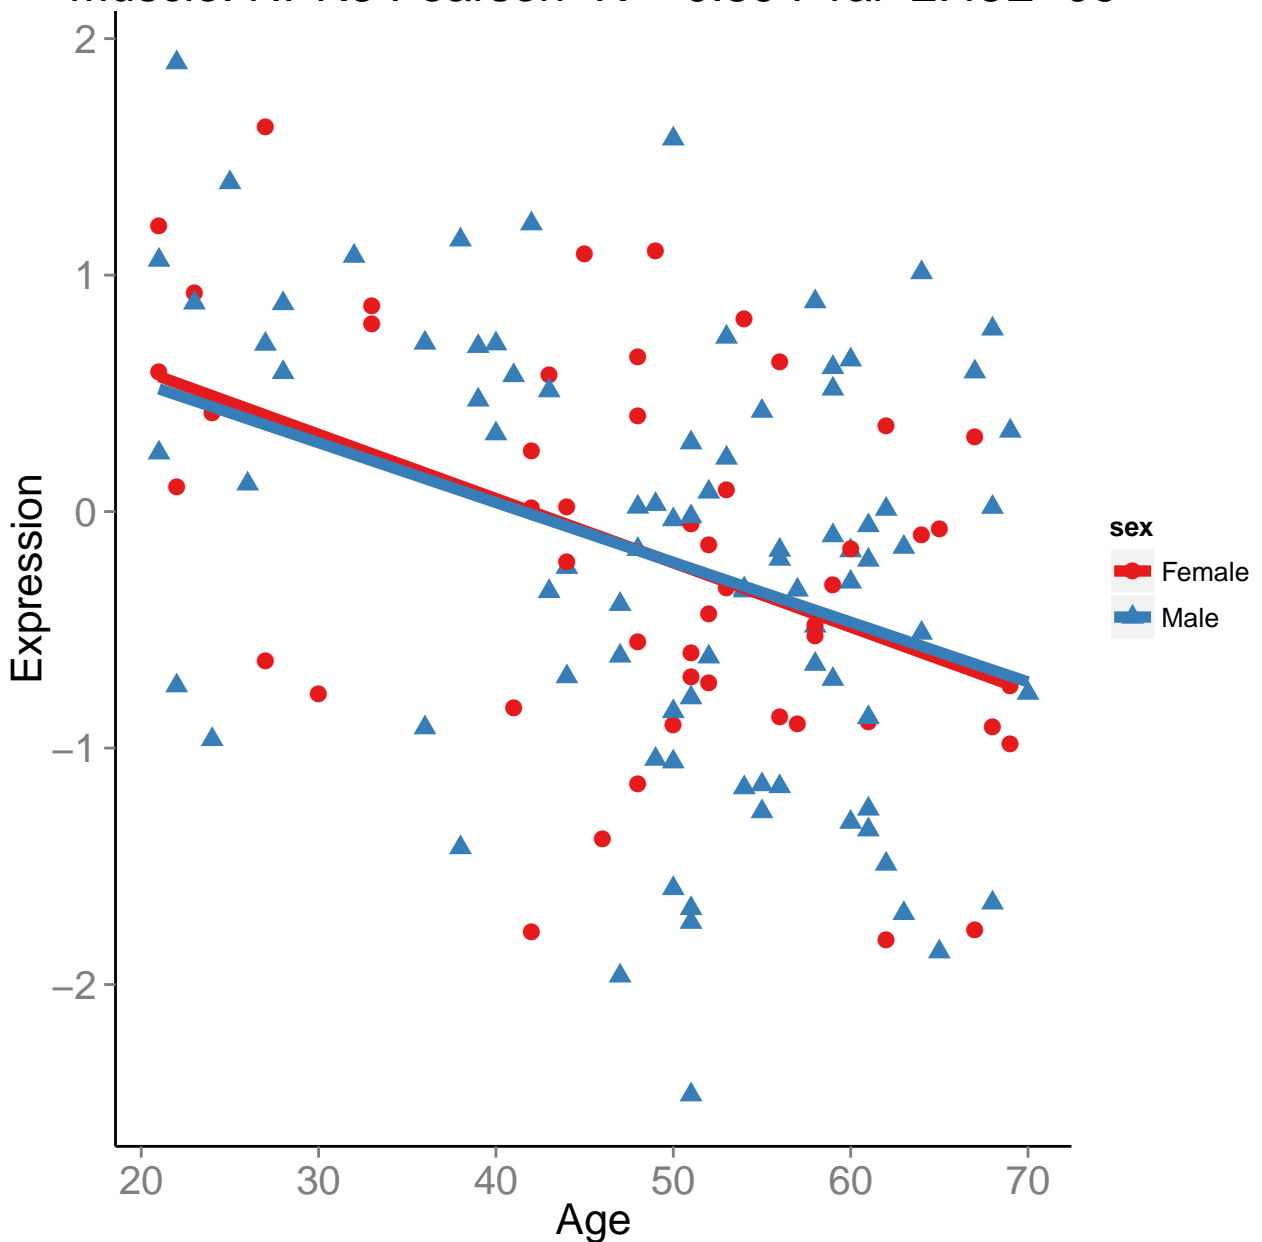

Muscle: FAM219B Pearson-R=0.39 Pval=2.42E-06

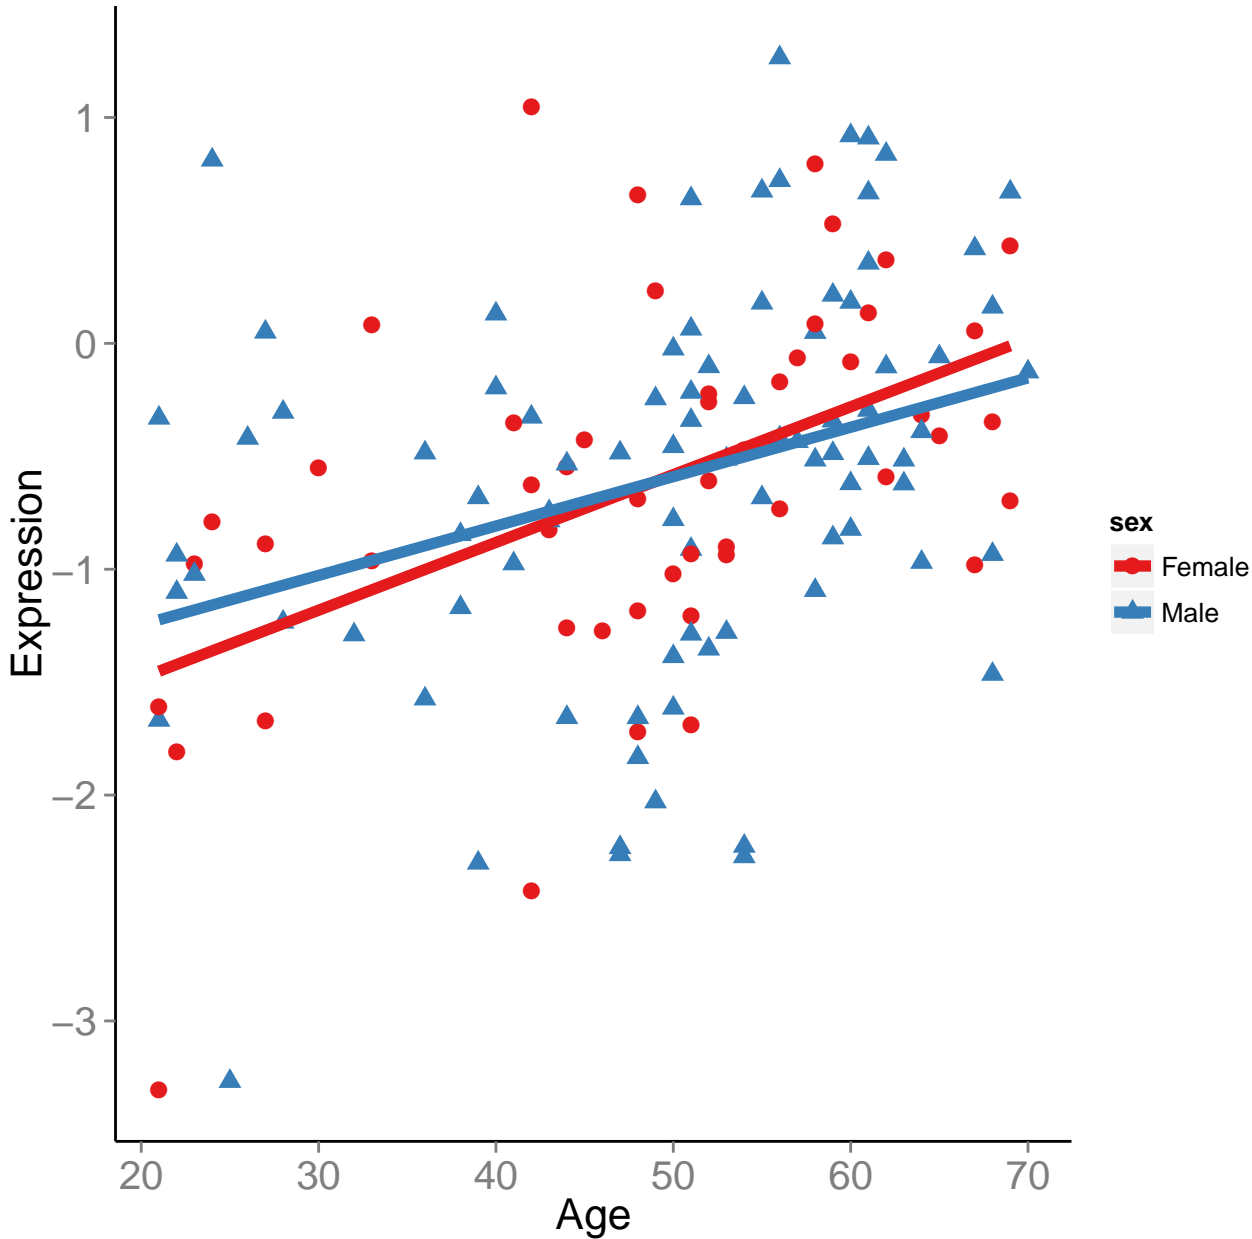

Muscle: ZNF644 Pearson-R=0.39 Pval=2.53E-06

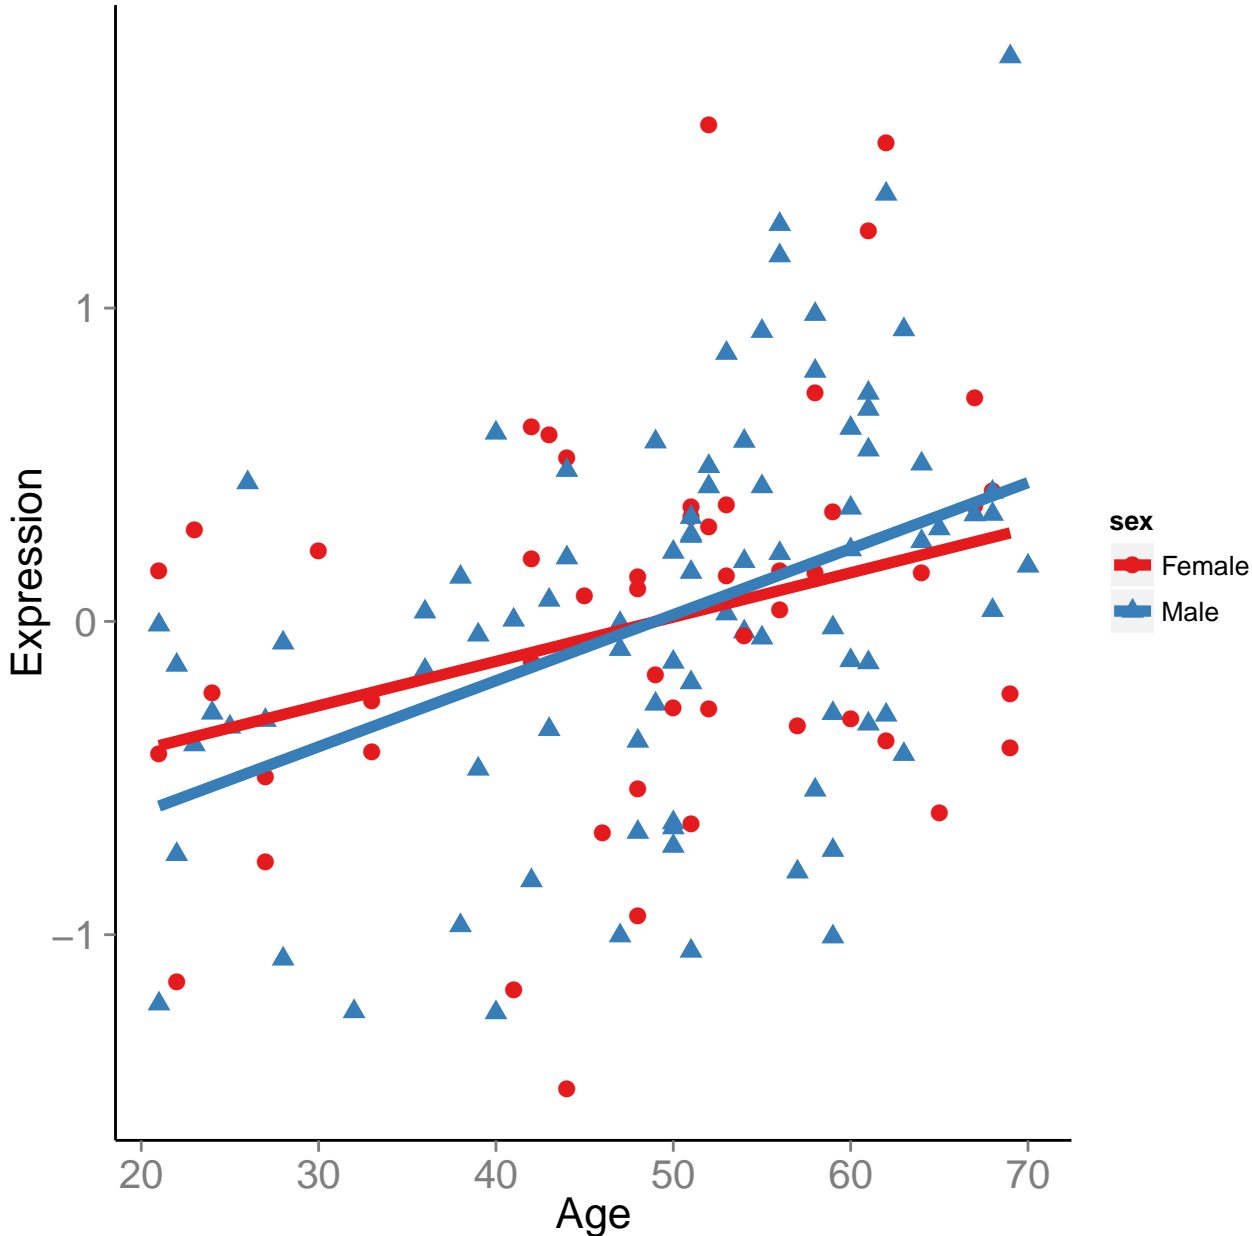

Muscle: FMNL2 Pearson-R=0.39 Pval=2.57E-06

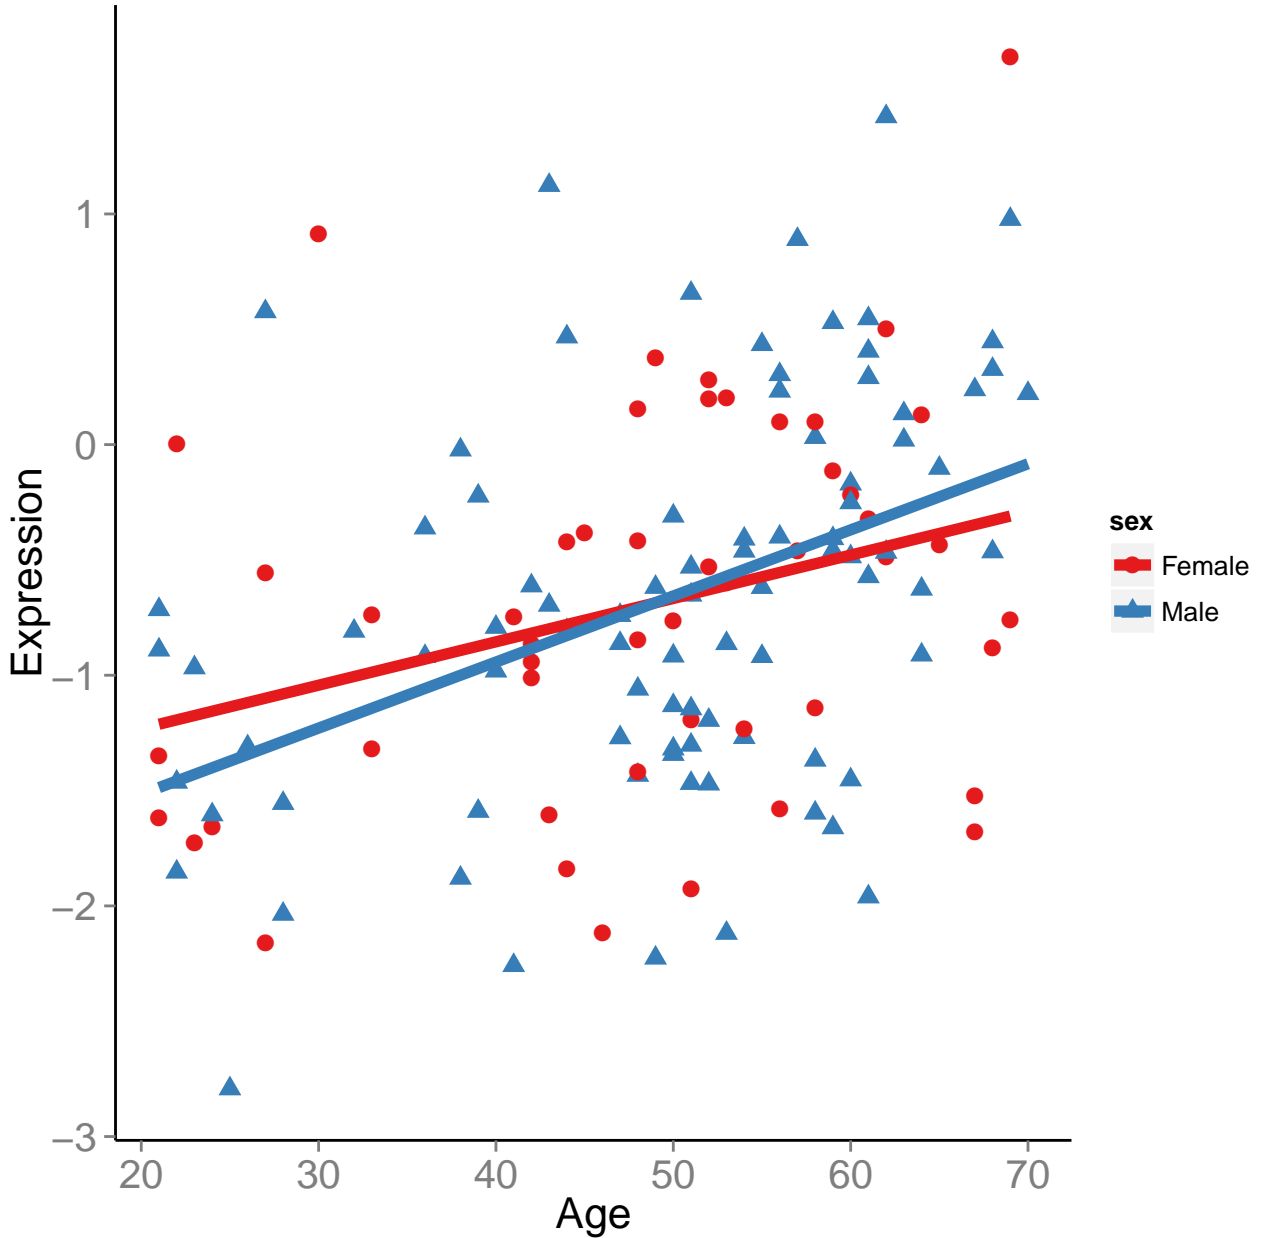

Muscle: RP11-1212A22.1 Pearson-R=0.39 Pval=2.61E-06

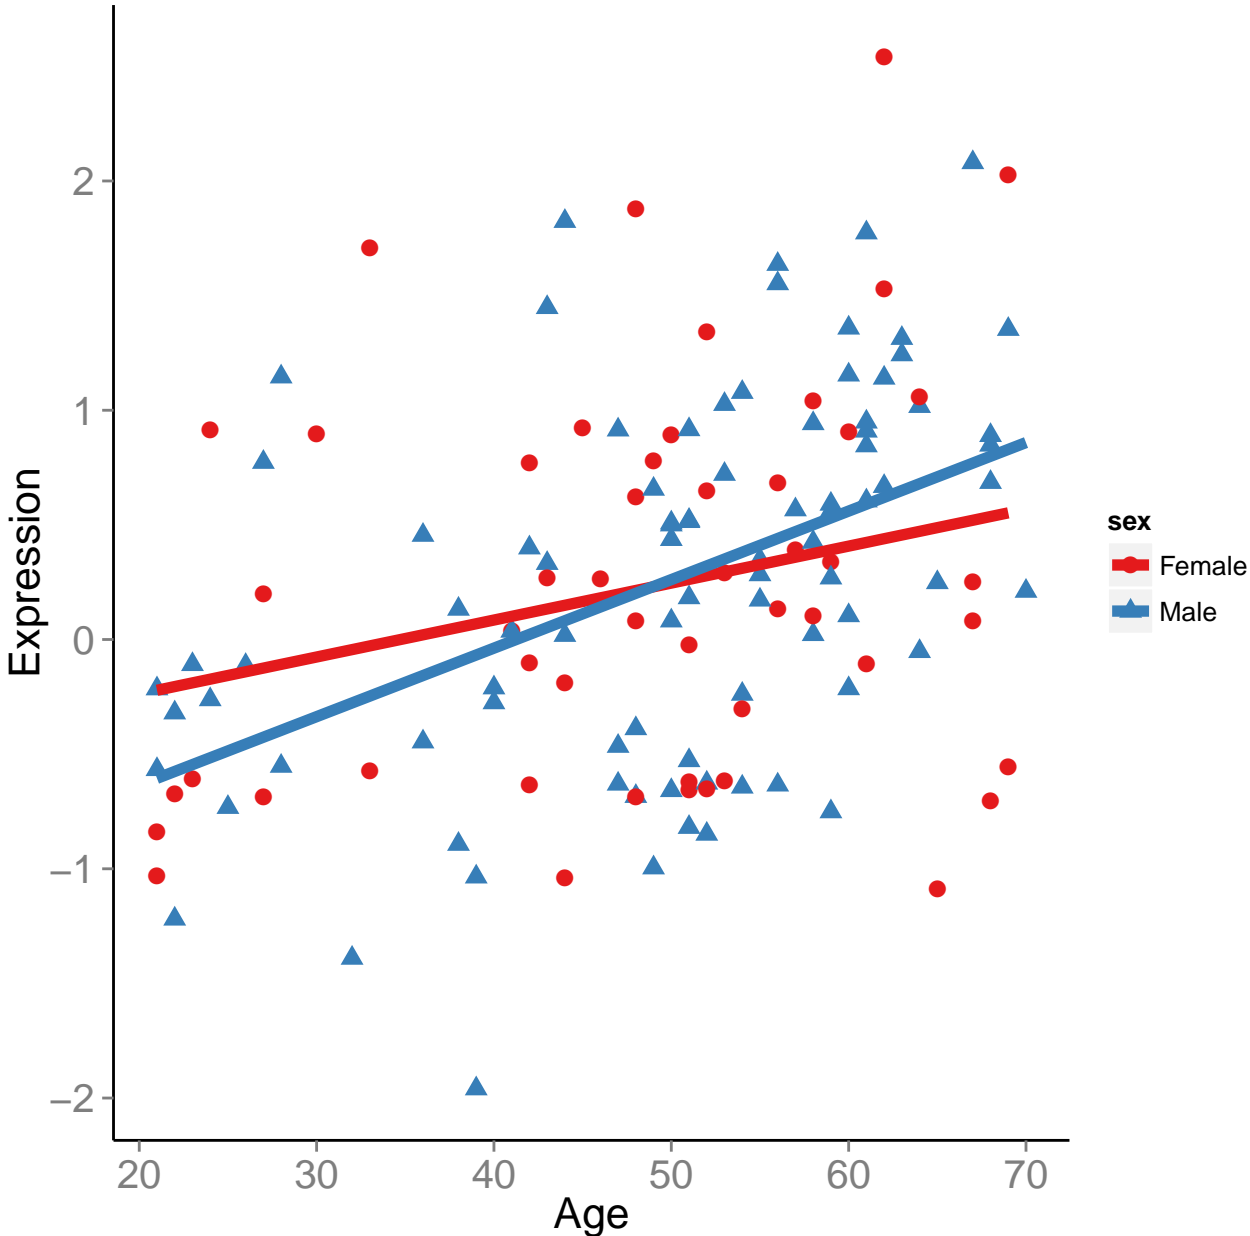

Muscle: UBAP1L Pearson-R=0.39 Pval=2.66E-06

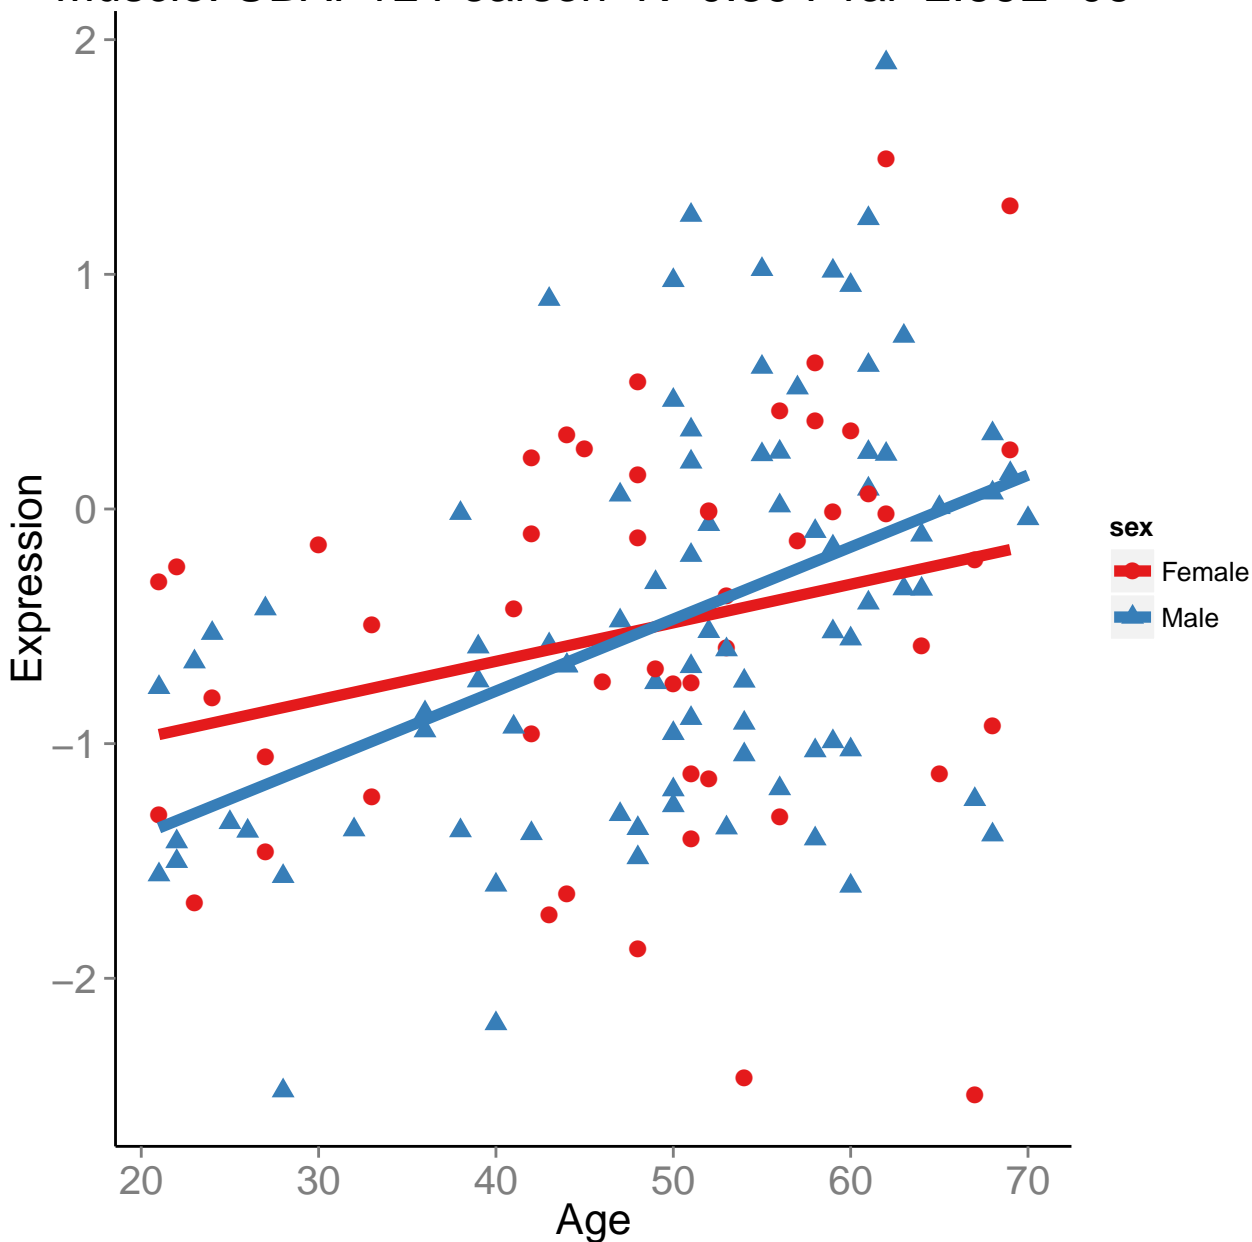

Muscle: GUSBP11 Pearson-R=0.39 Pval=2.68E-06

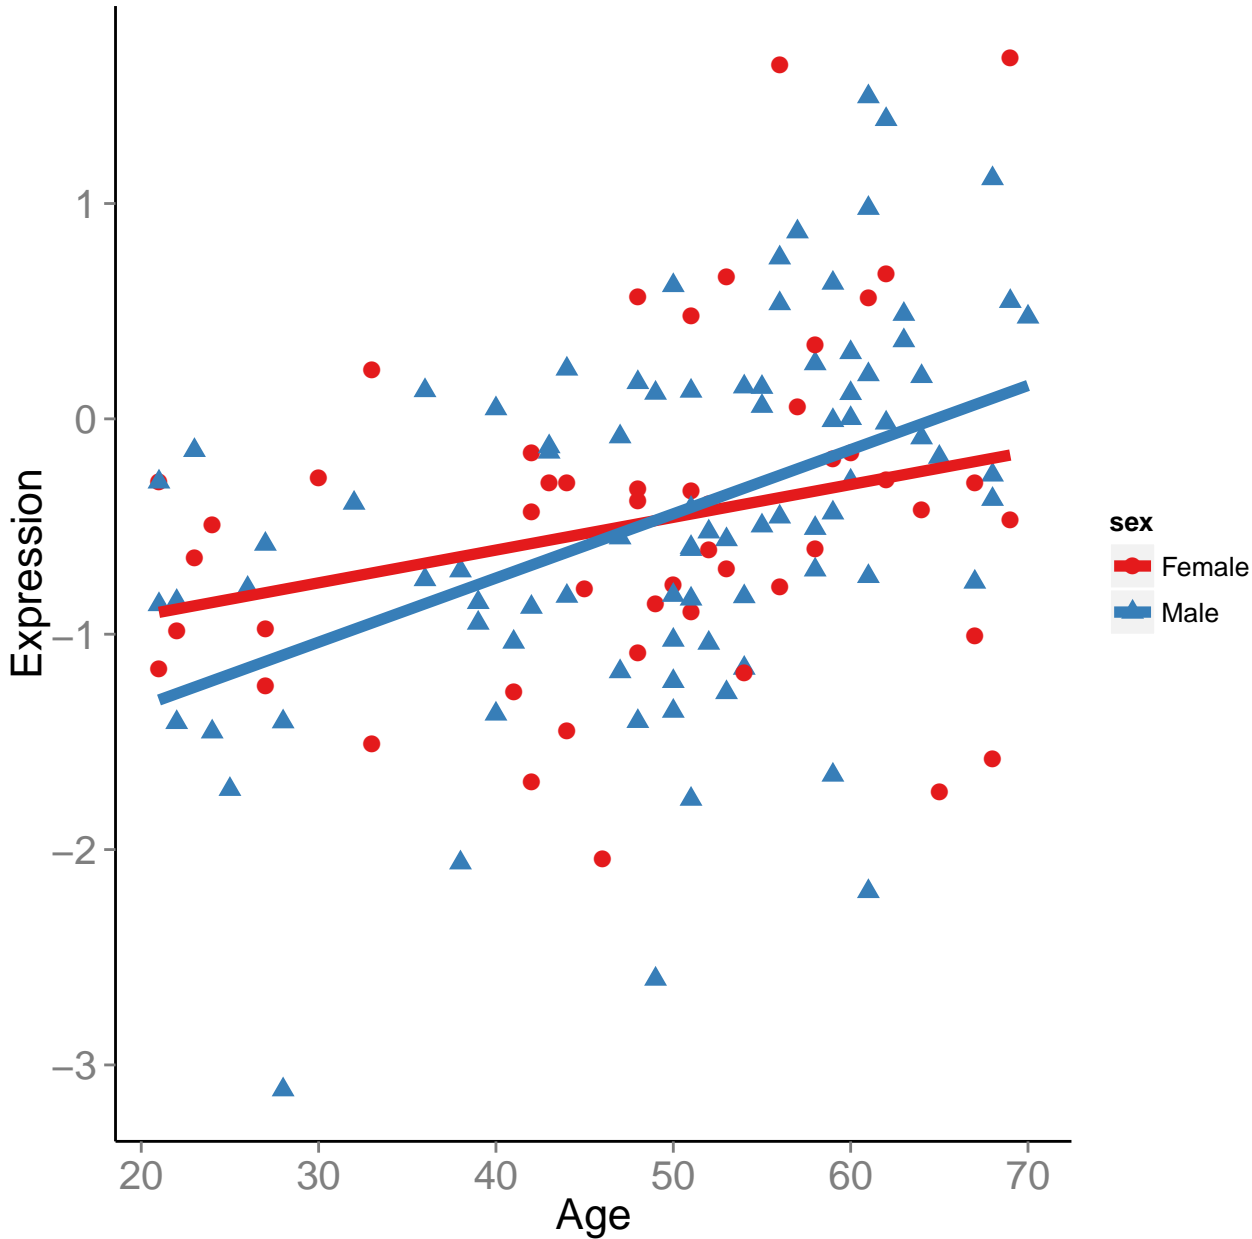

Muscle: FAM193A Pearson-R=0.39 Pval=2.80E-06

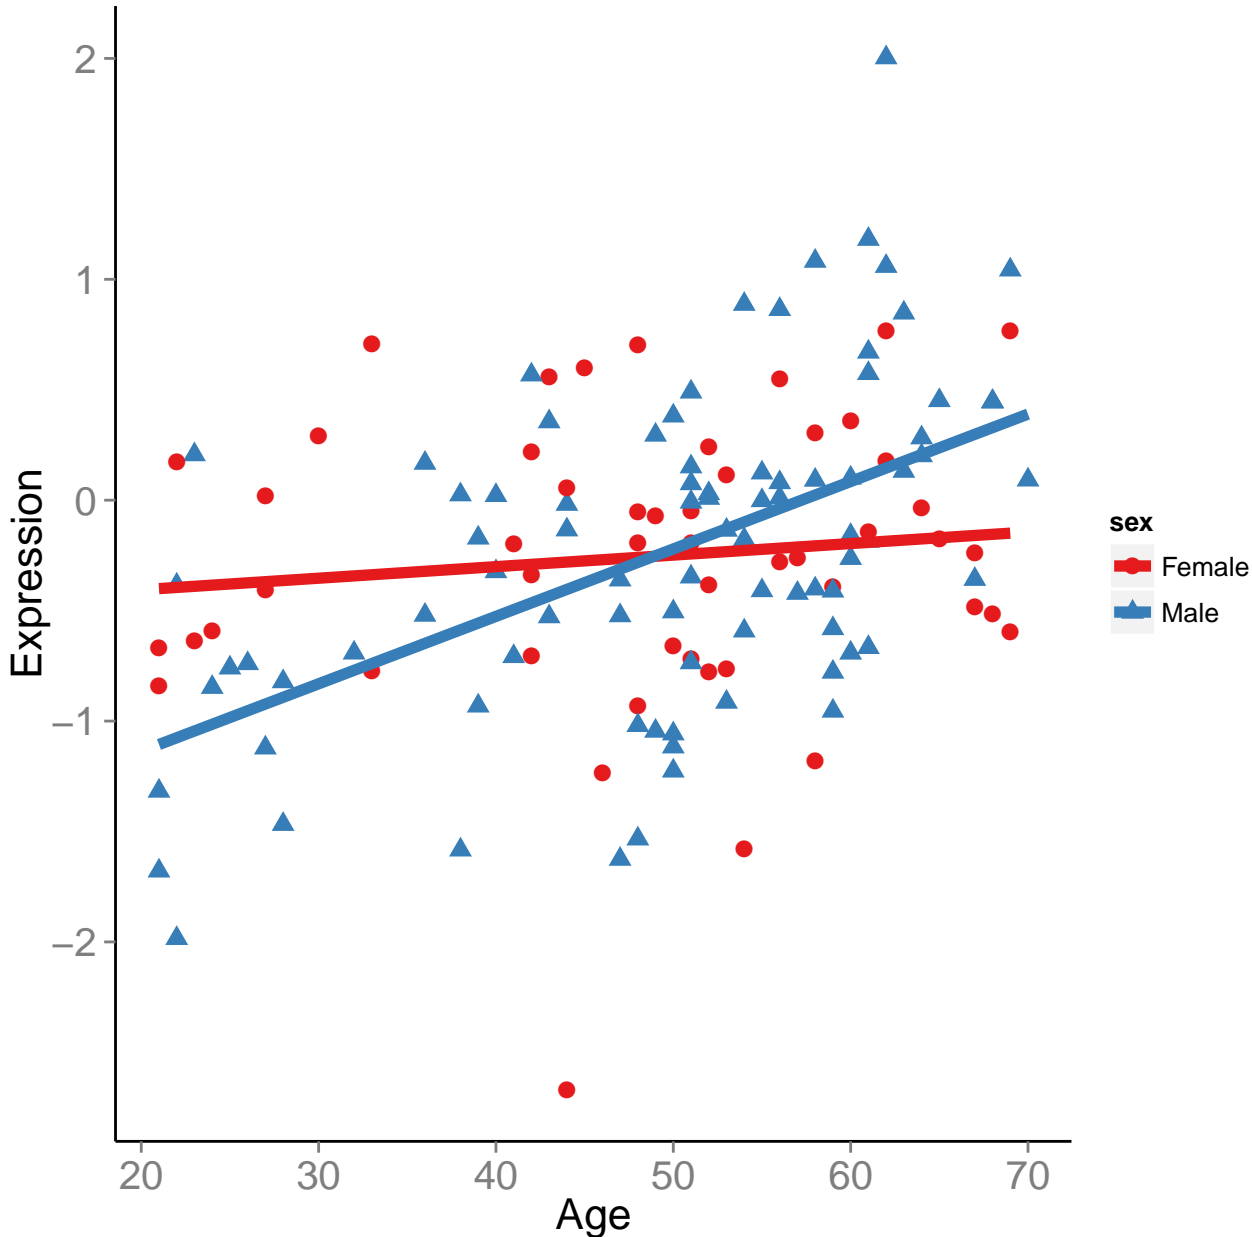



Muscle: ACADL Pearson-R=0.39 Pval=3.04E-06

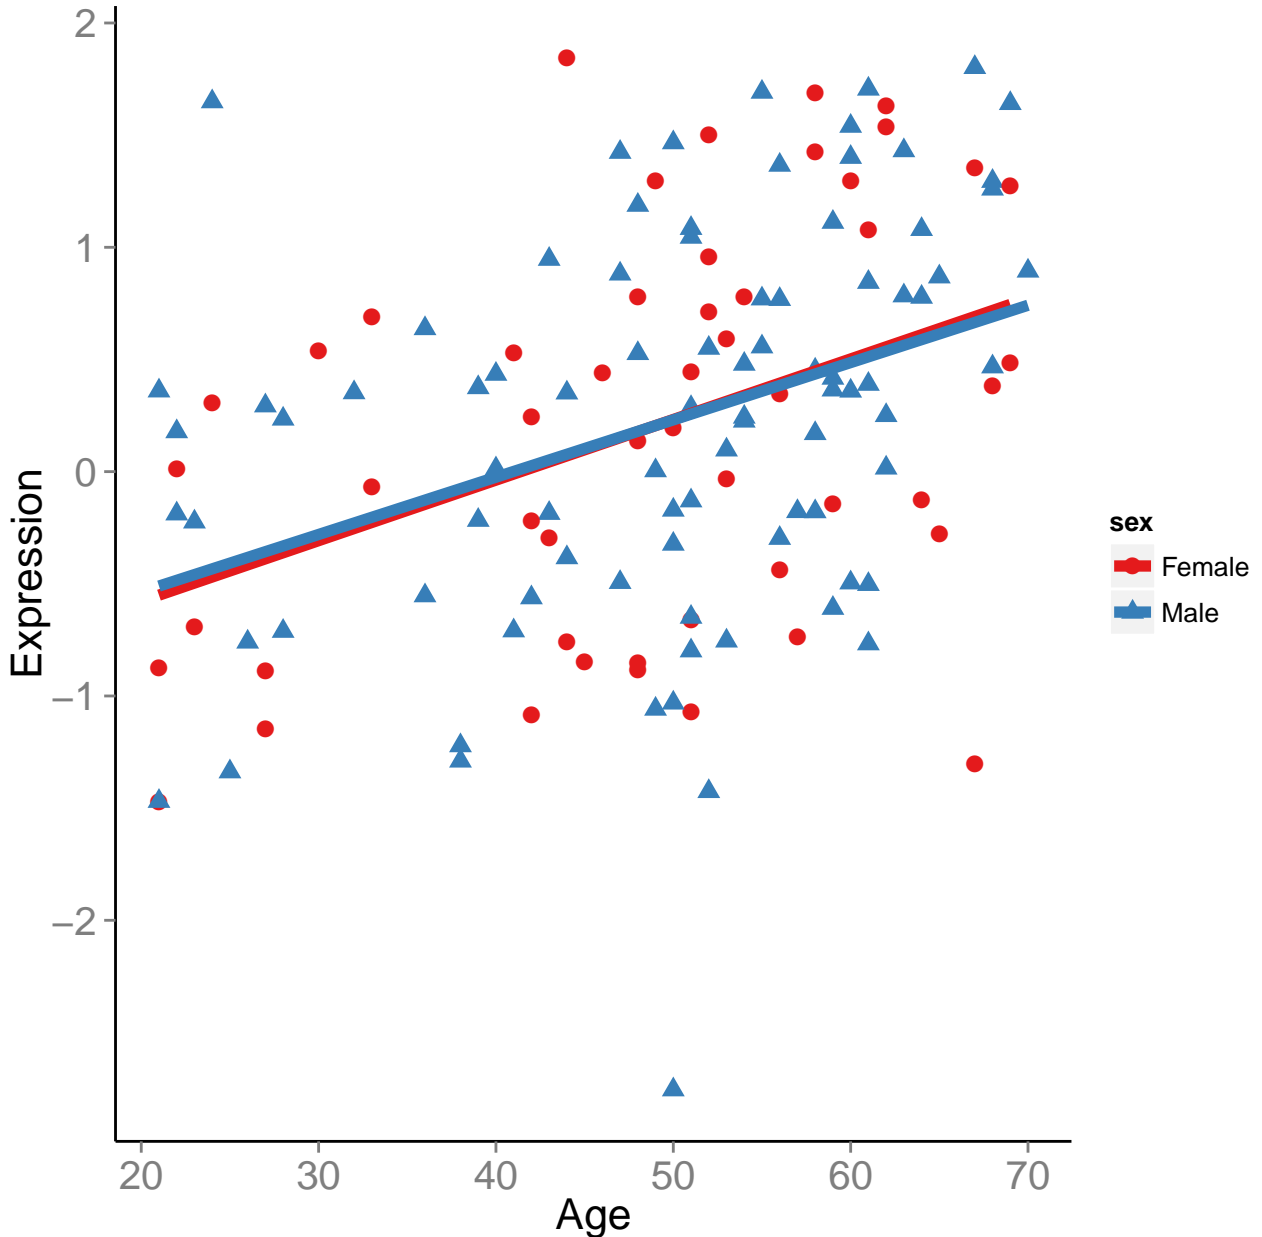

Muscle: POM121 Pearson-R=0.39 Pval=3.02E-06

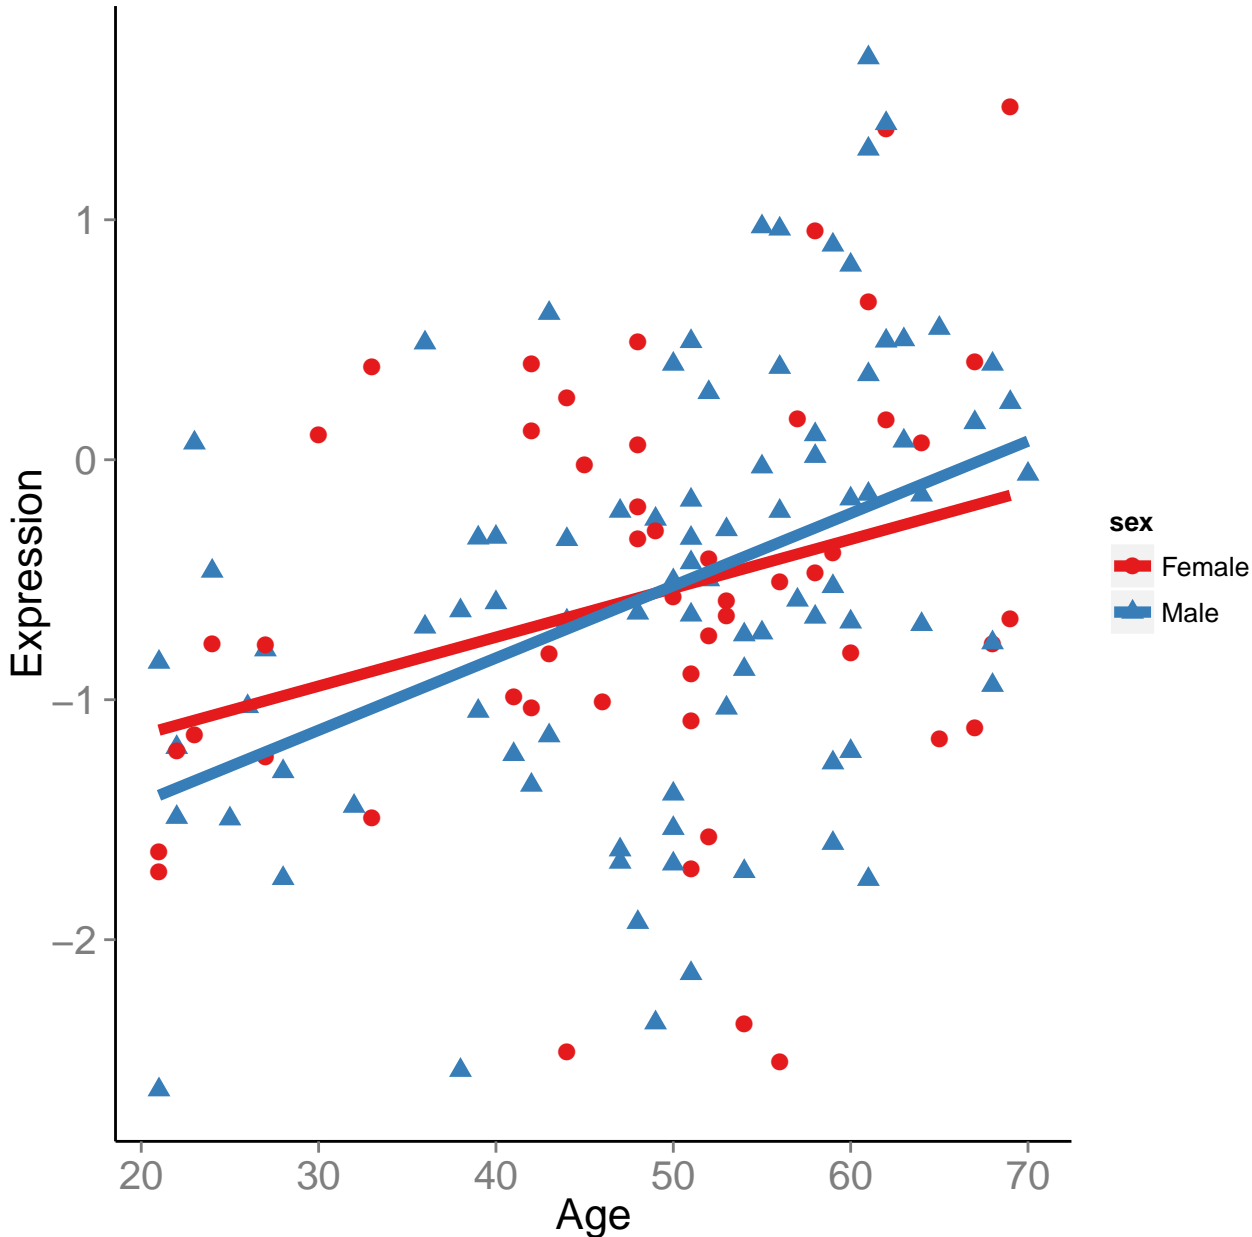

Muscle: CPSF3L Pearson-R=0.39 Pval=2.97E-06

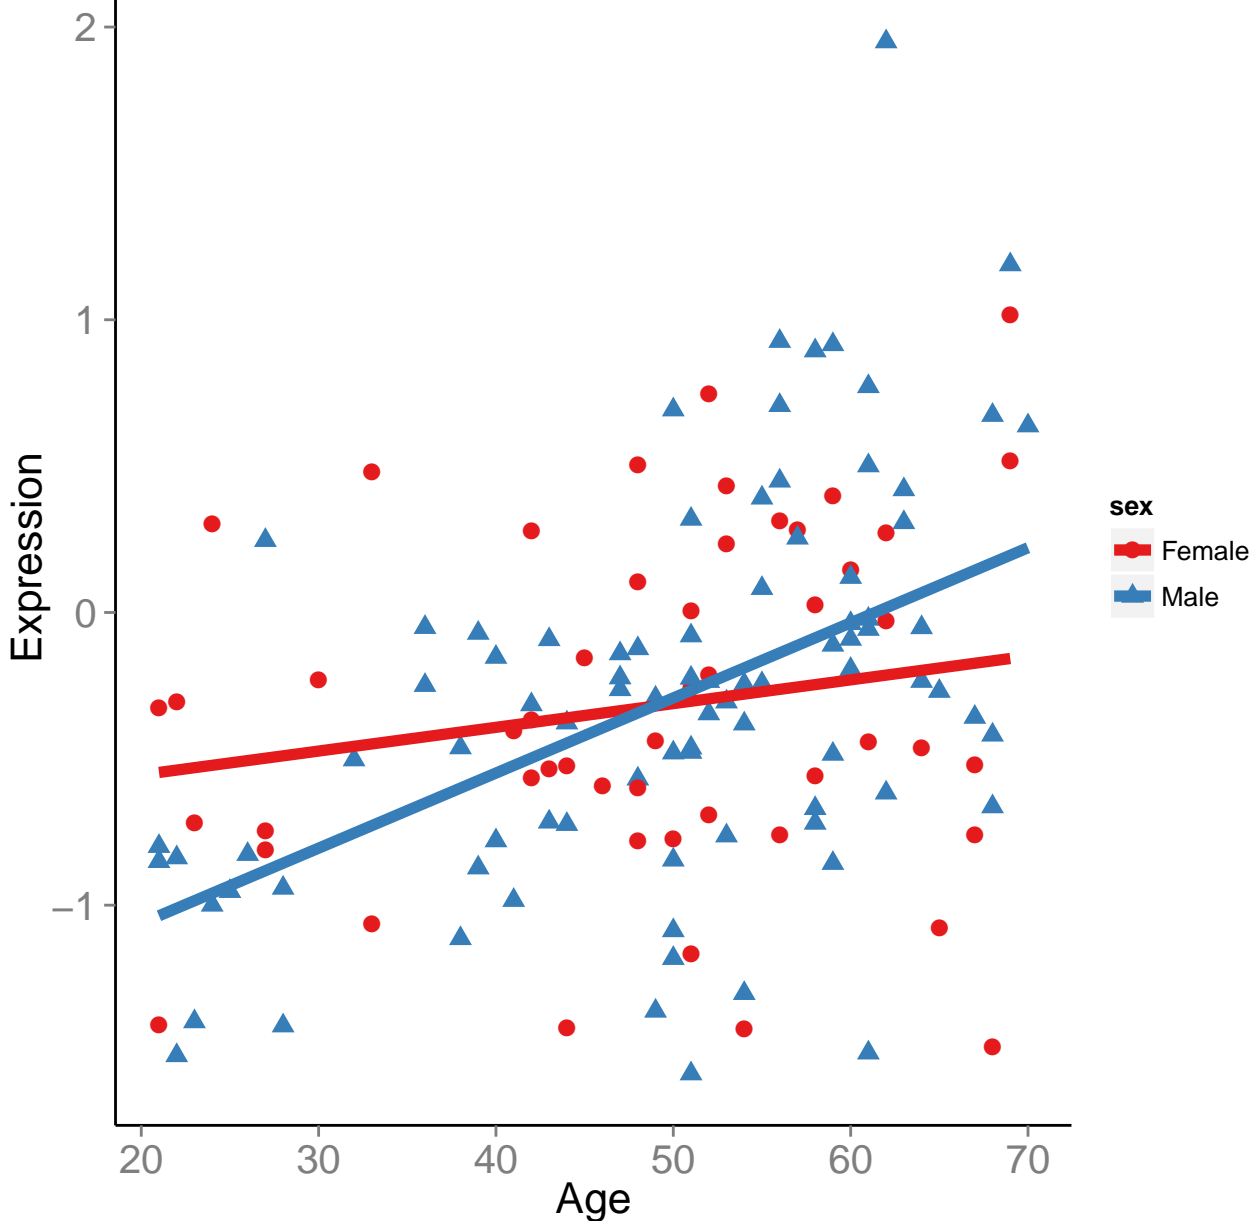

Muscle: DICER1 Pearson-R=0.39 Pval=3.05E-06

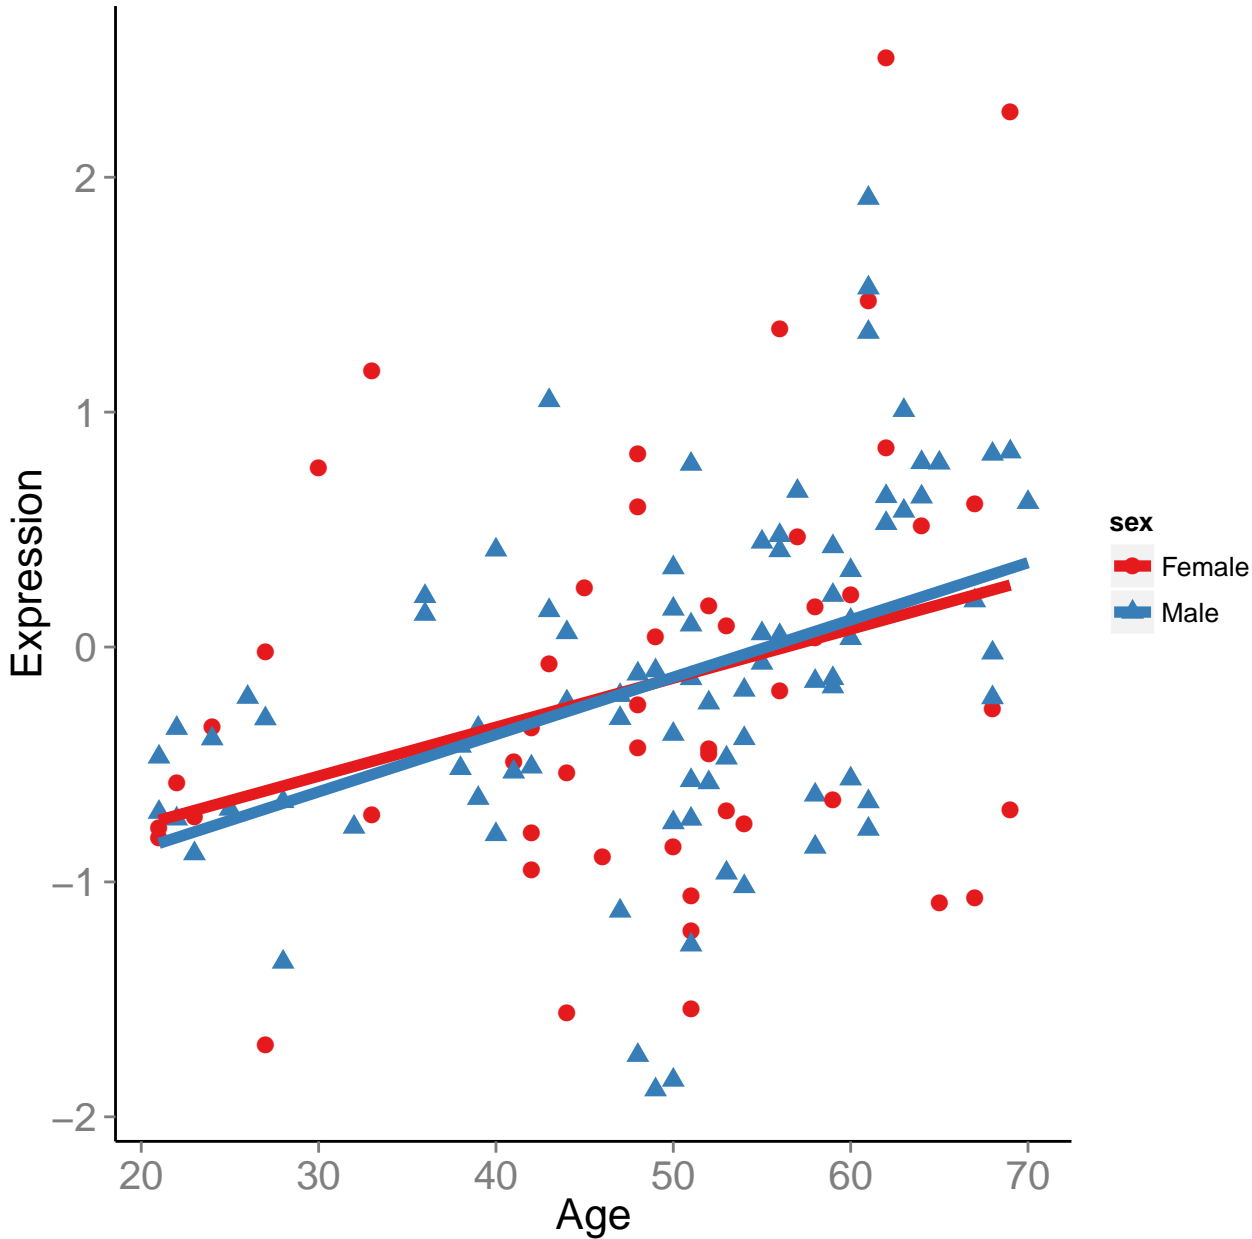

Muscle: GPAA1 Pearson-R=0.39 Pval=2.93E-06

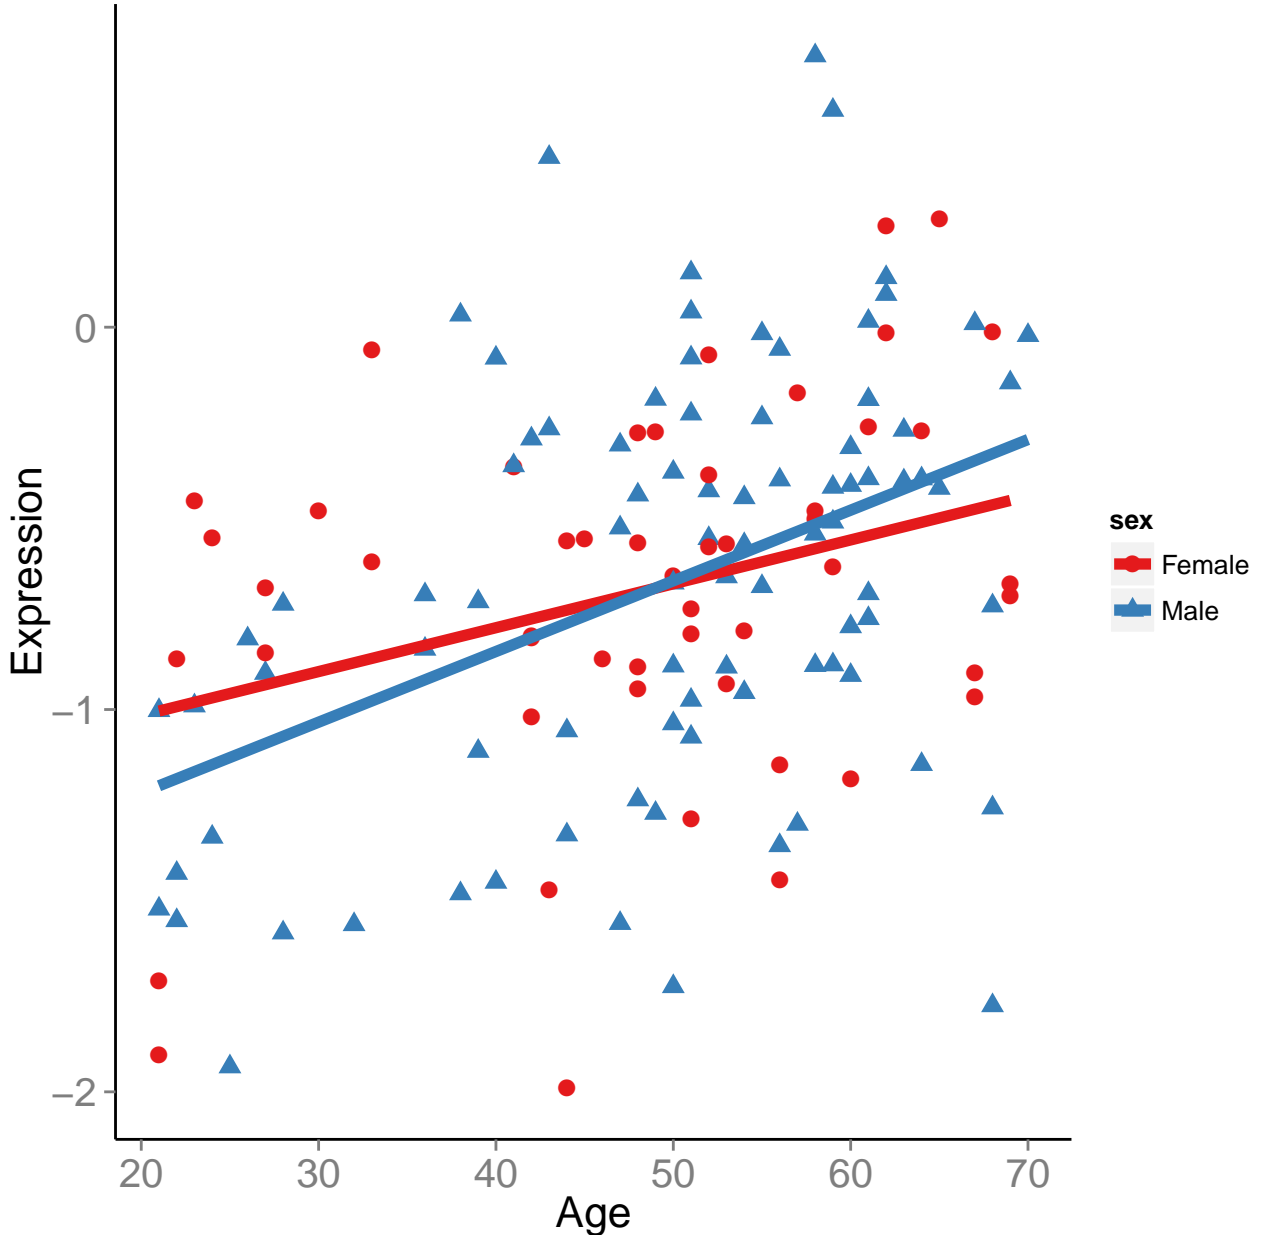

Muscle: DDX17 Pearson-R=0.39 Pval=3.11E-06

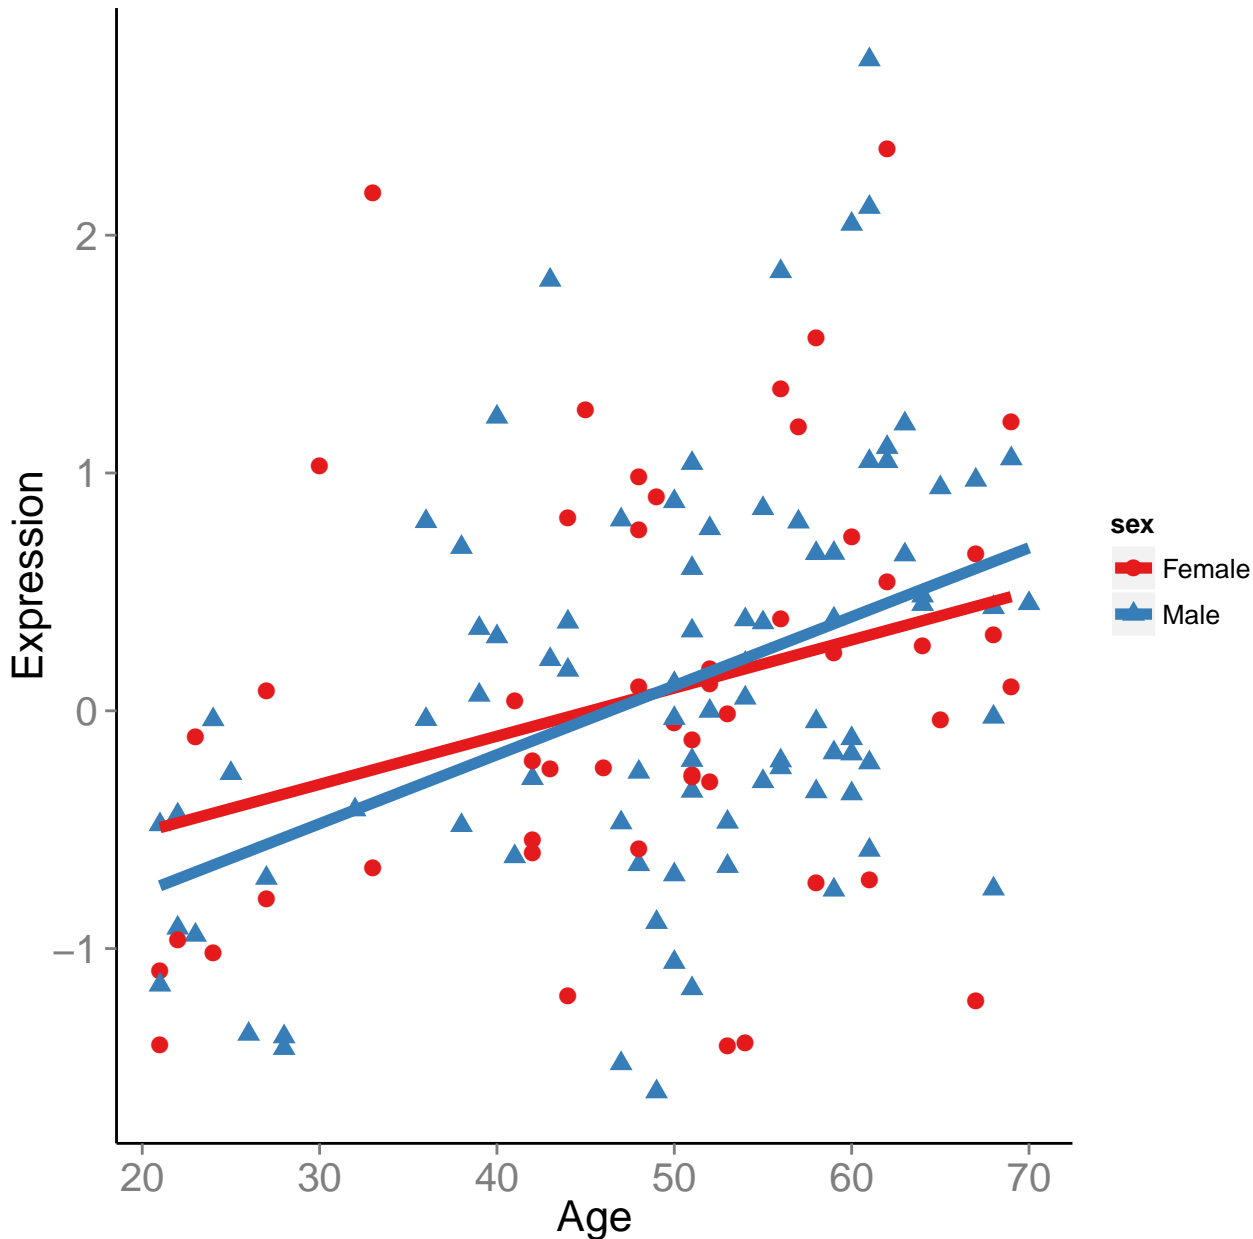

Muscle: ZMIZ2 Pearson-R=0.38 Pval=3.24E-06

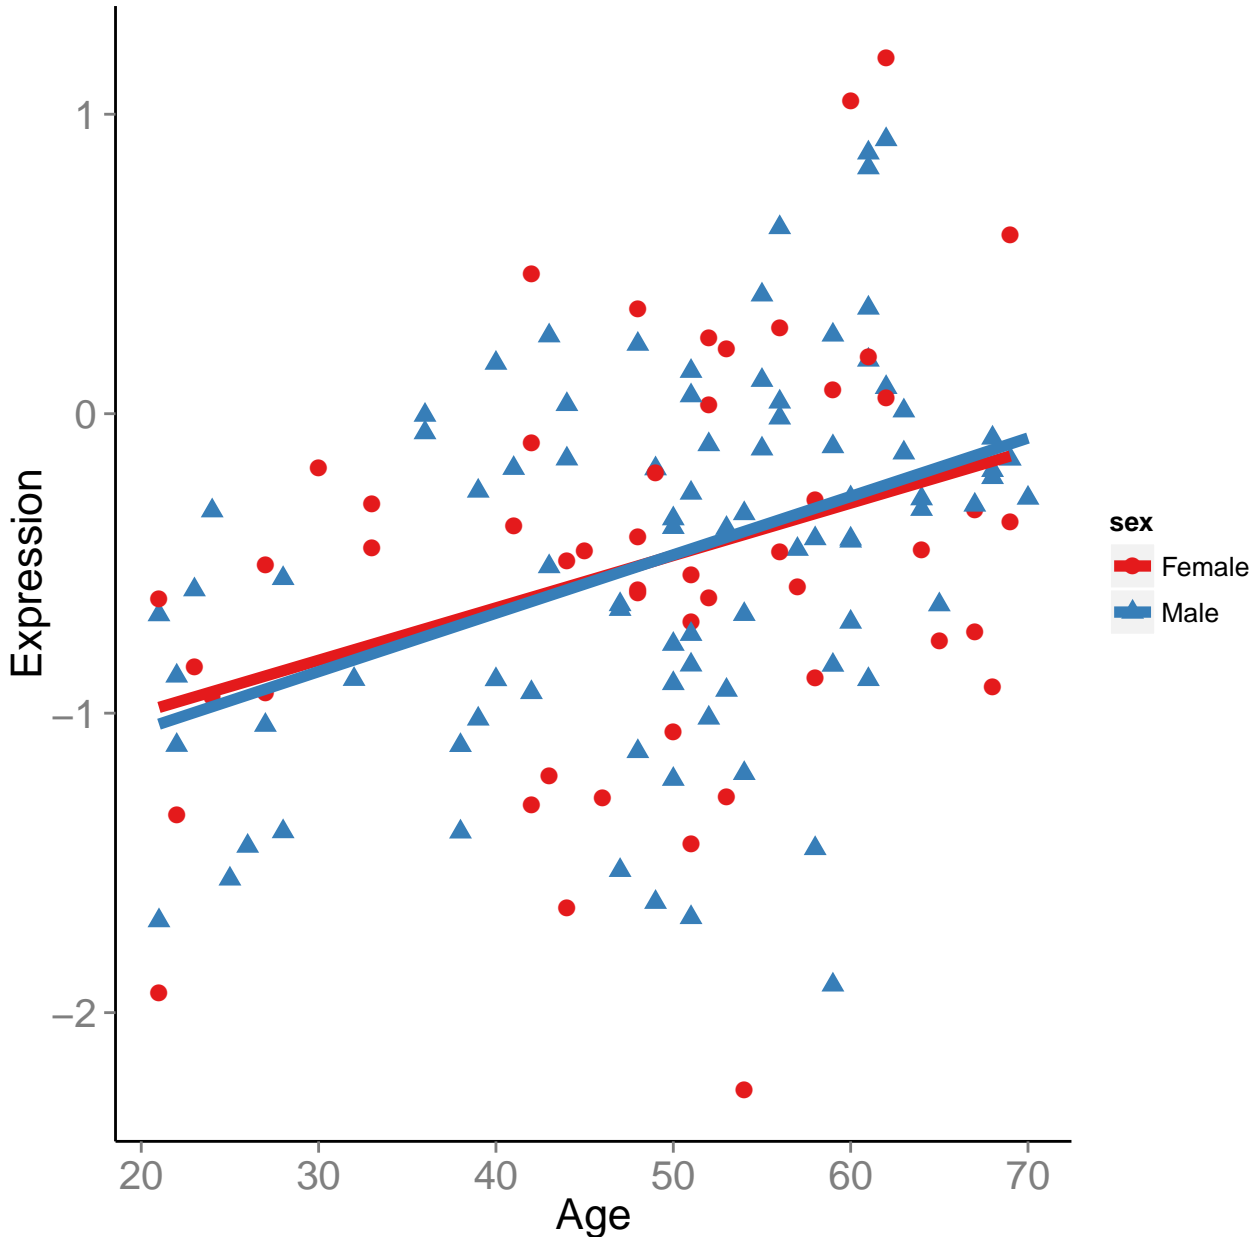

Muscle: GALT Pearson-R=0.38 Pval=3.23E-06

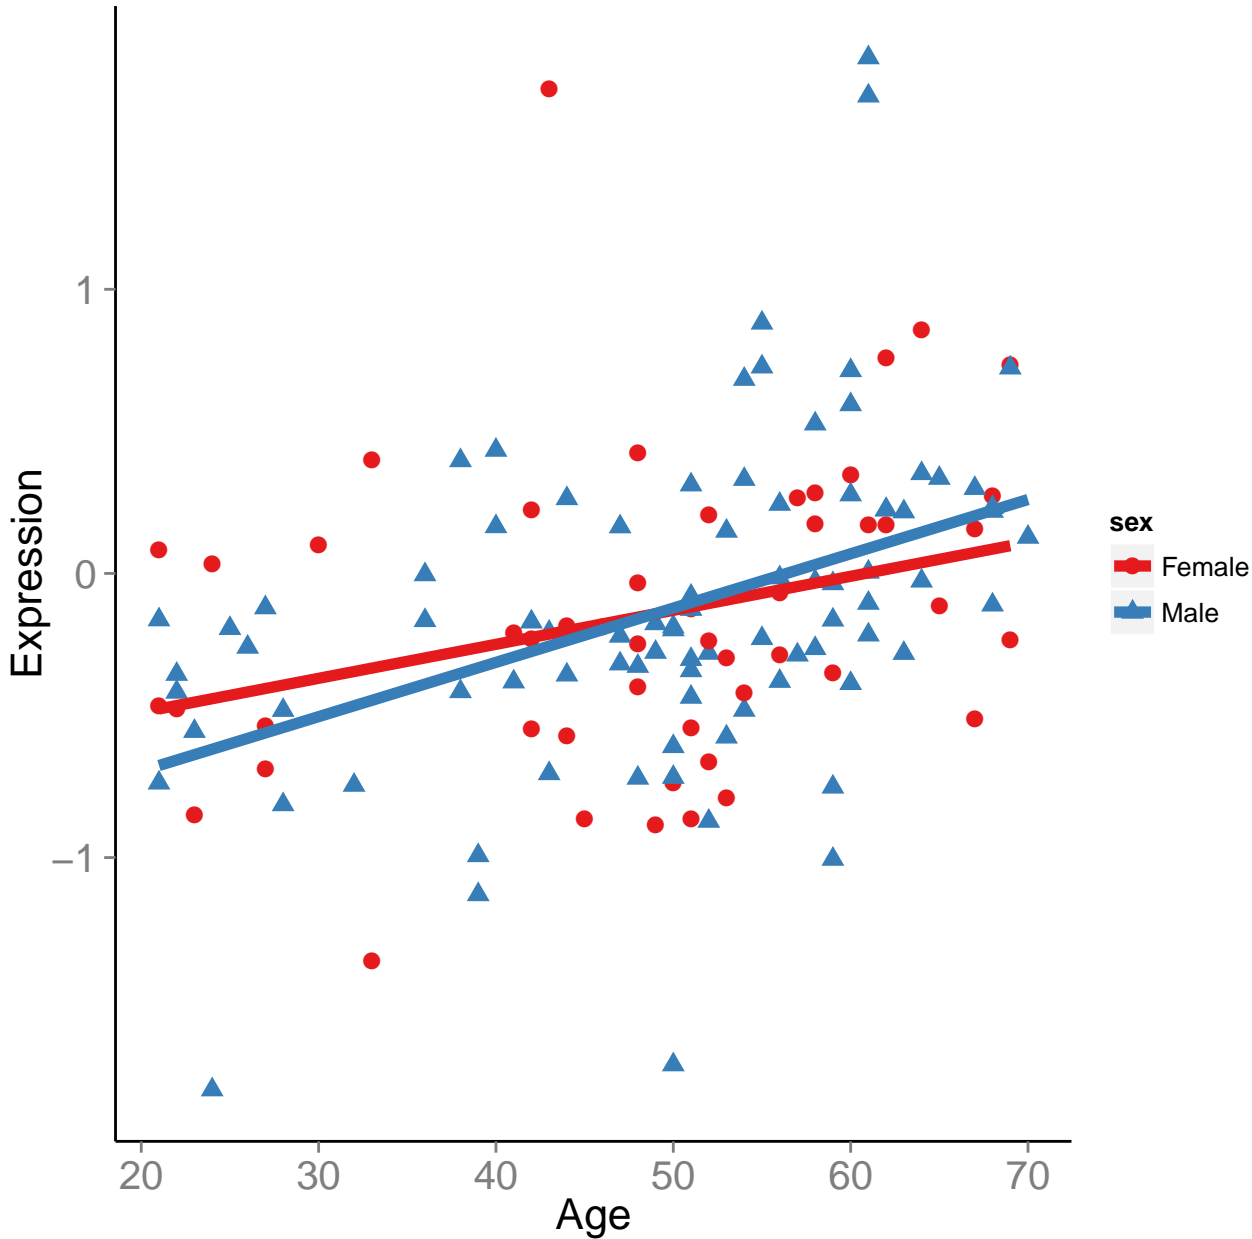



Muscle: GCLM Pearson-R=-0.38 Pval=3.31E-06

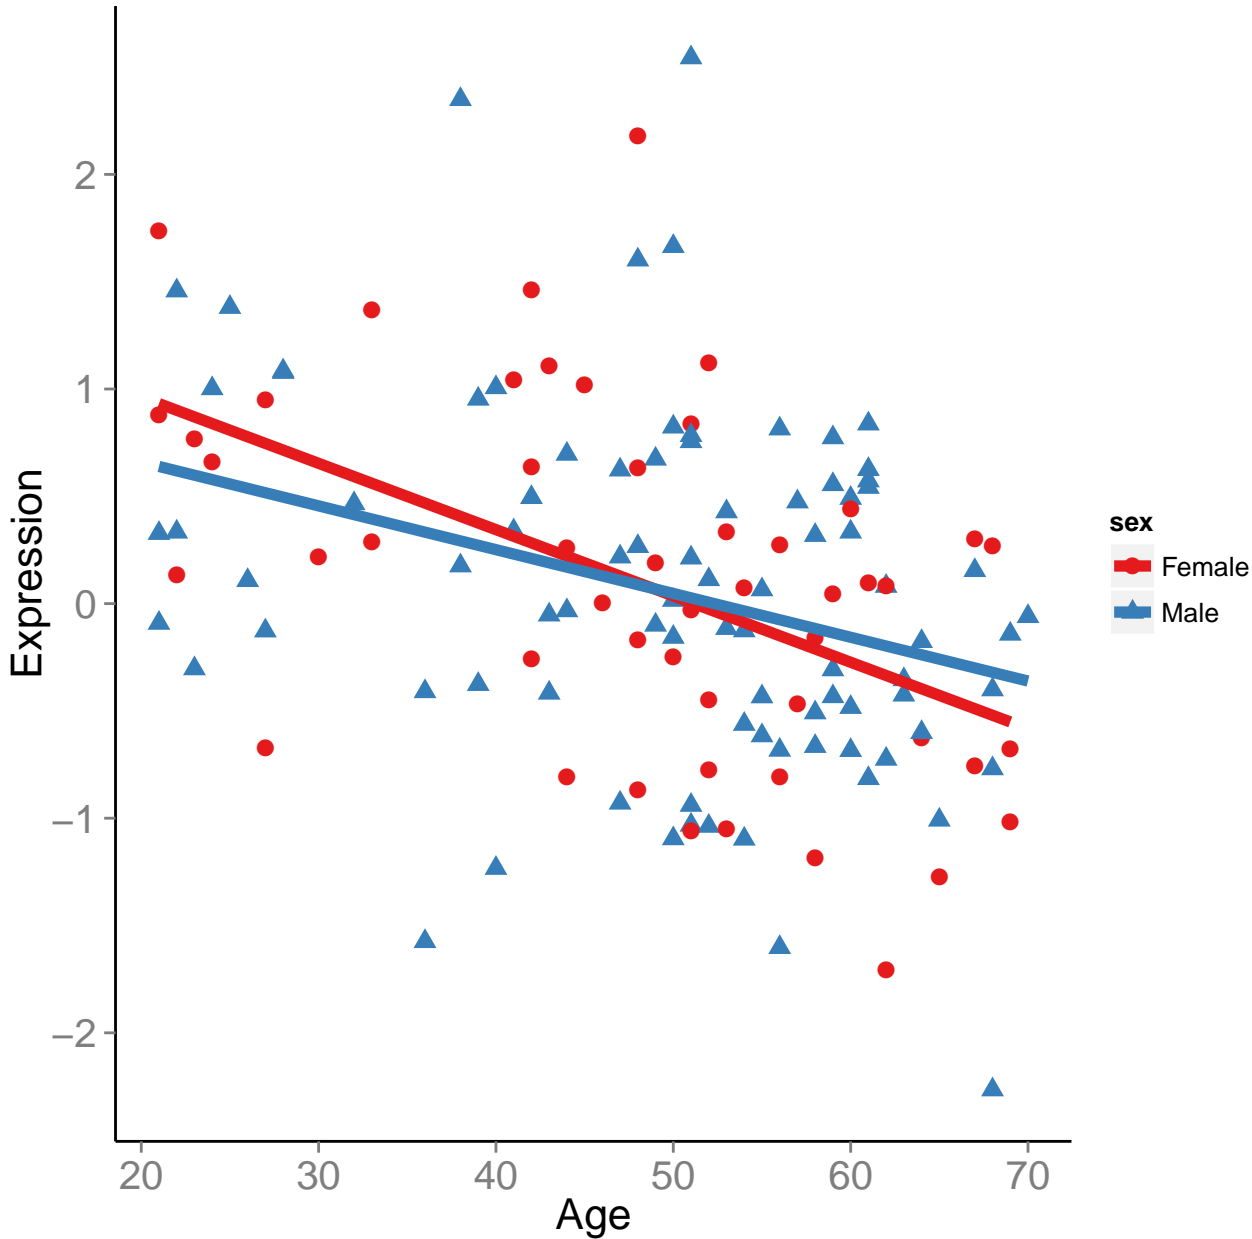

Muscle: CTIF Pearson-R=-0.38 Pval=3.50E-06

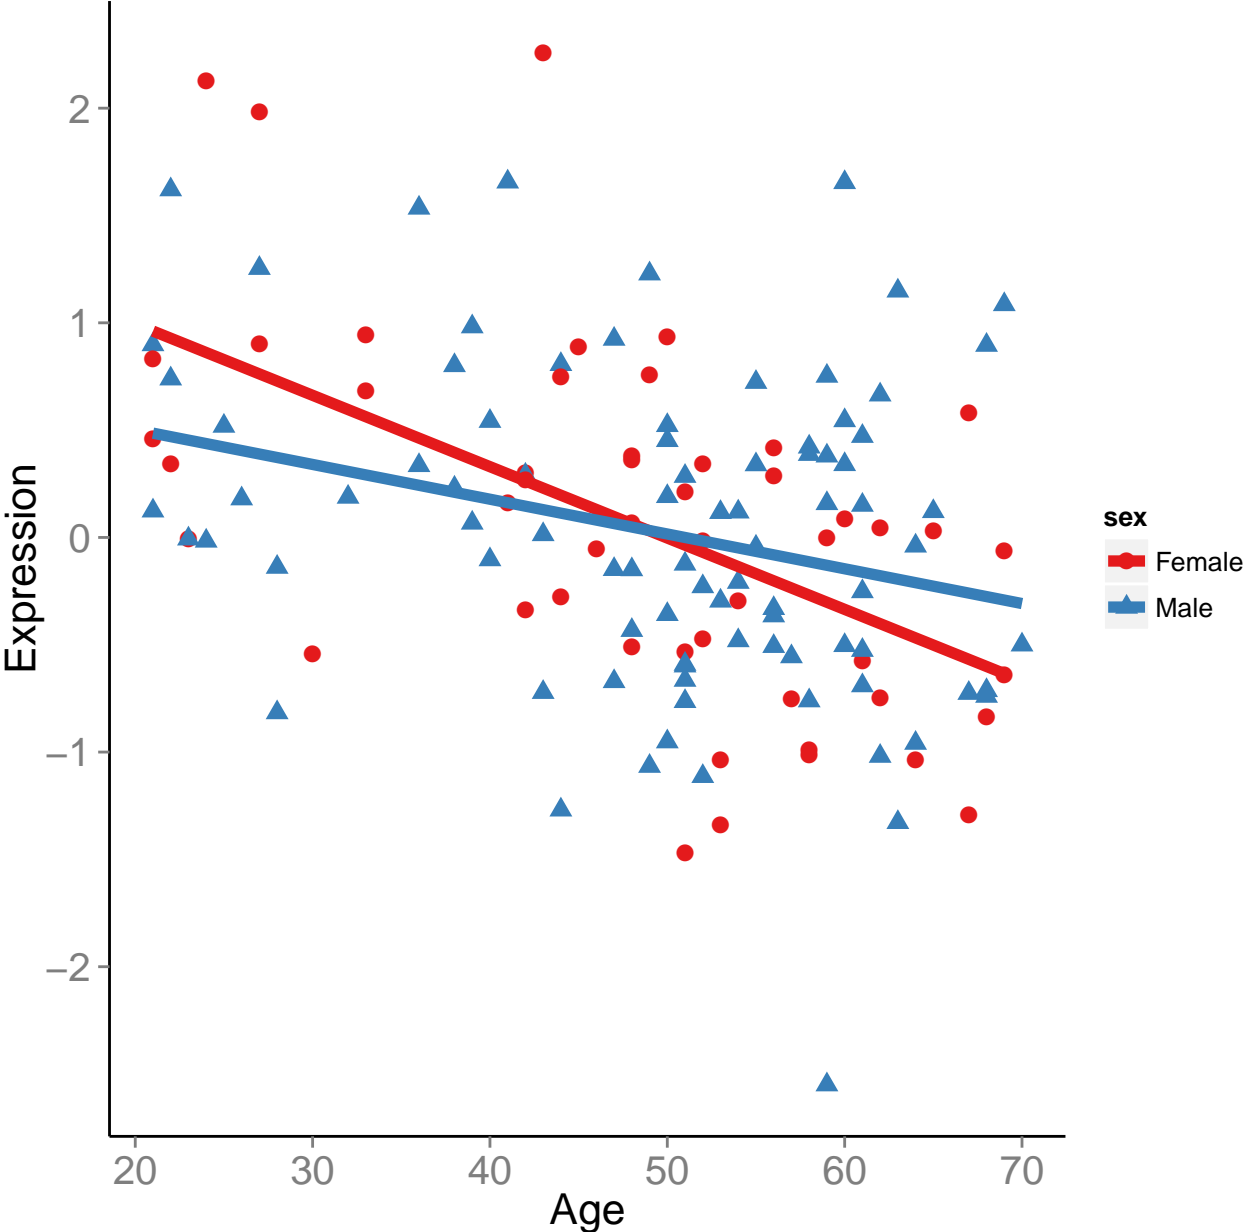

Muscle: USP54 Pearson-R=0.38 Pval=3.52E-06

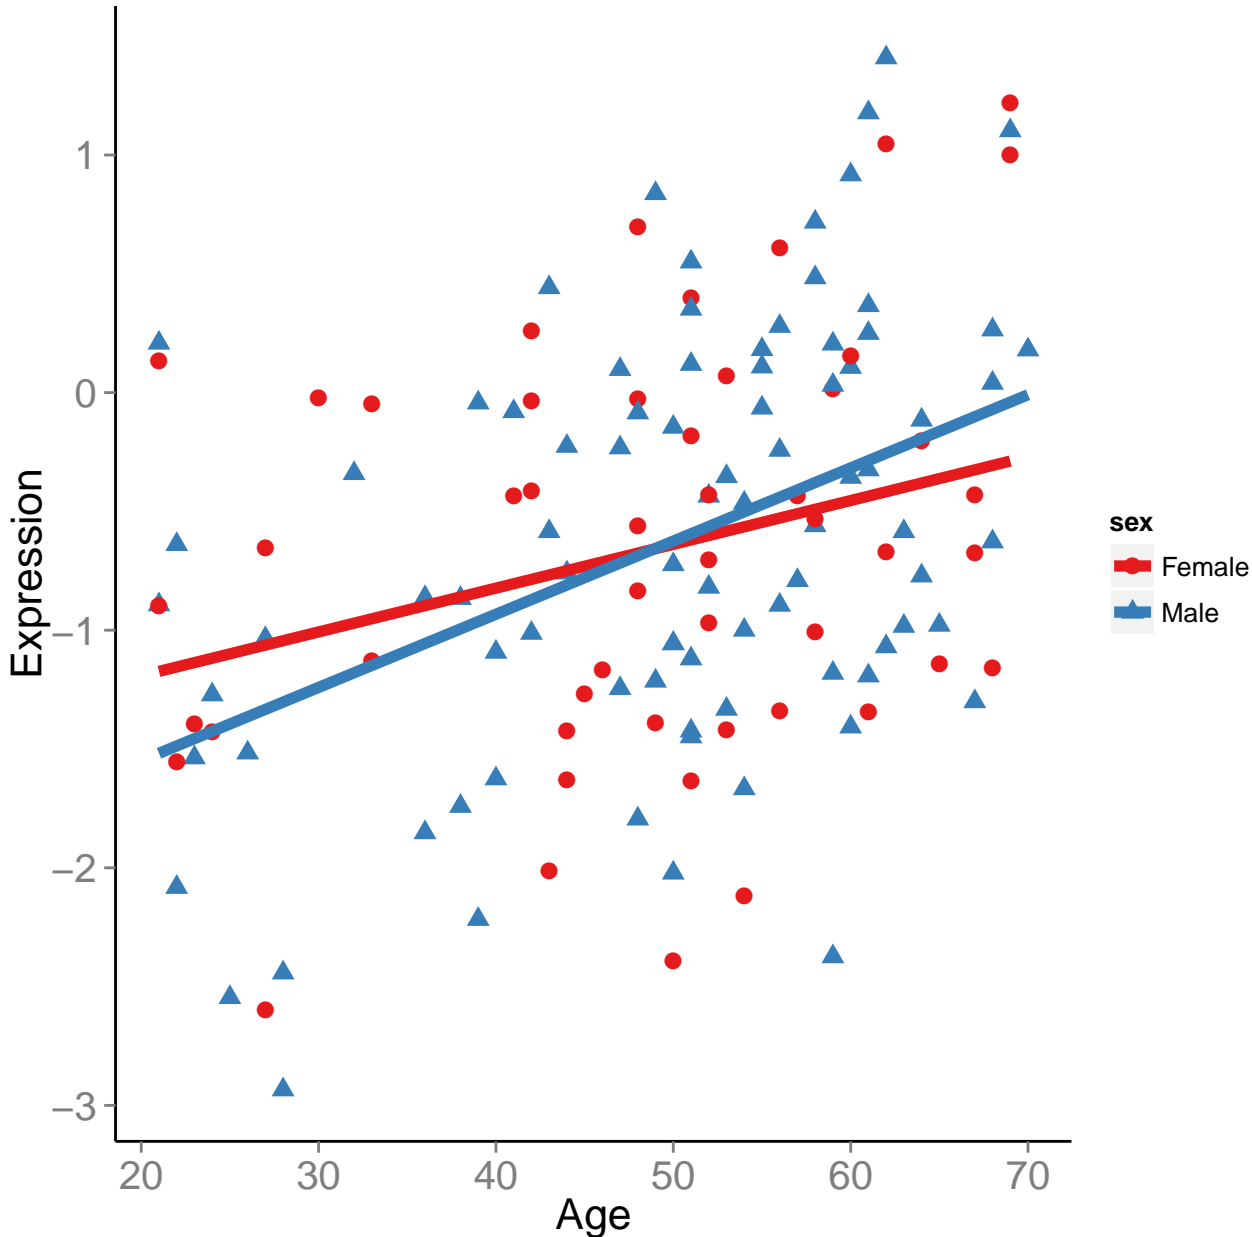

Muscle: BPTF Pearson-R=0.38 Pval=3.95E-06

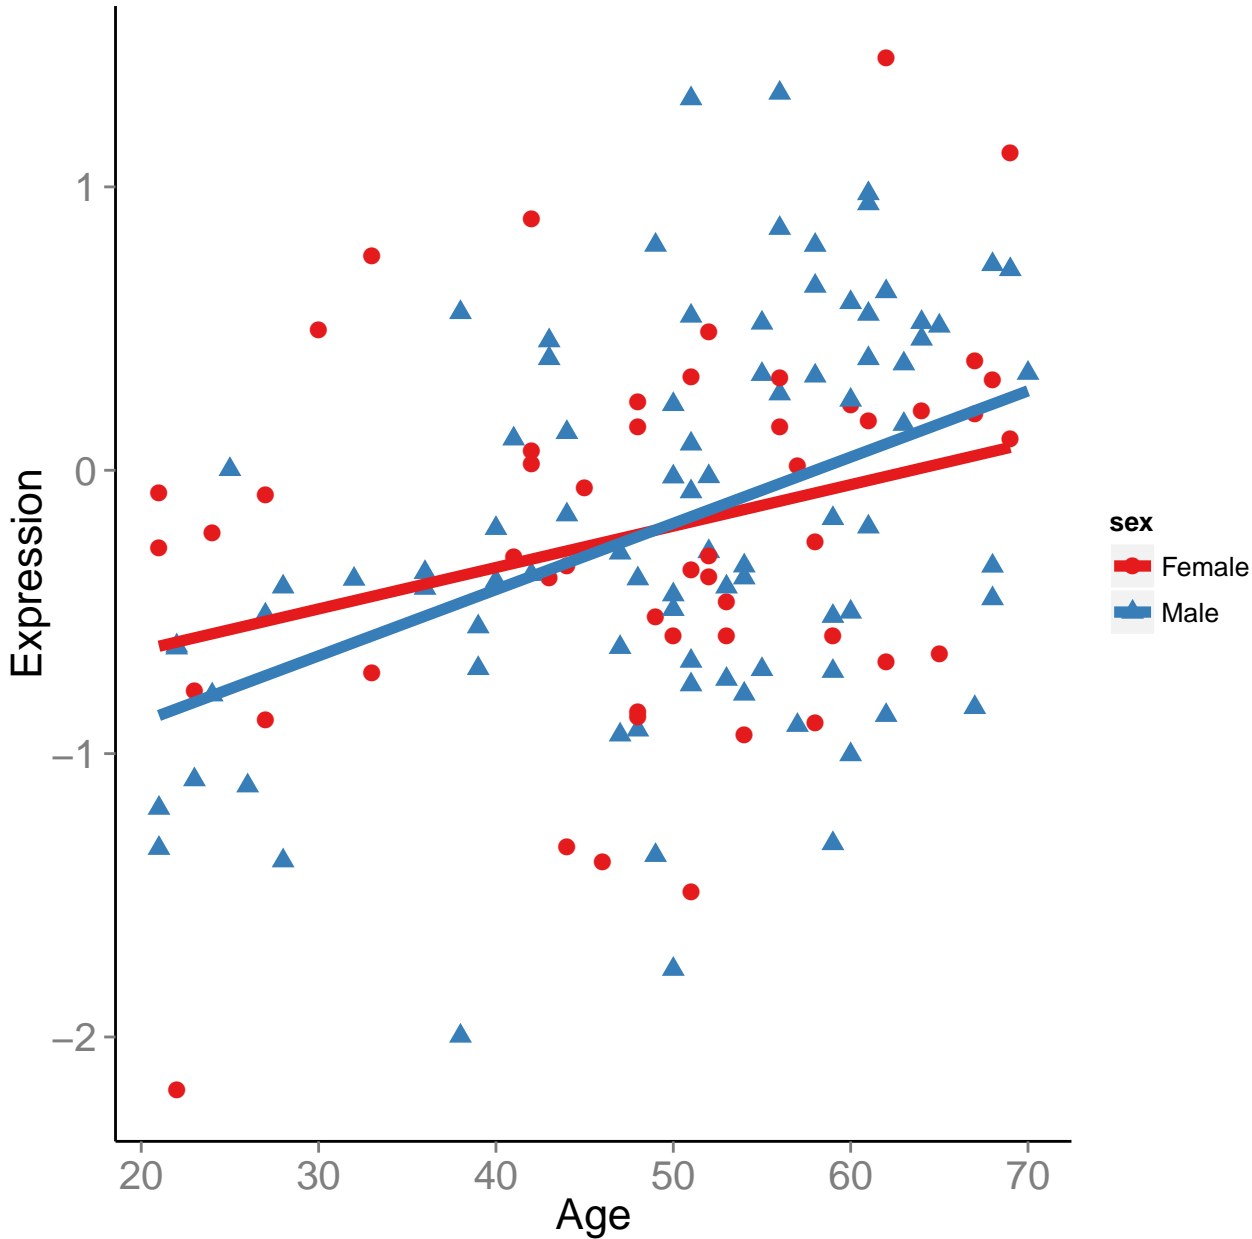

Muscle: RUFY1 Pearson-R=0.38 Pval=4.07E-06

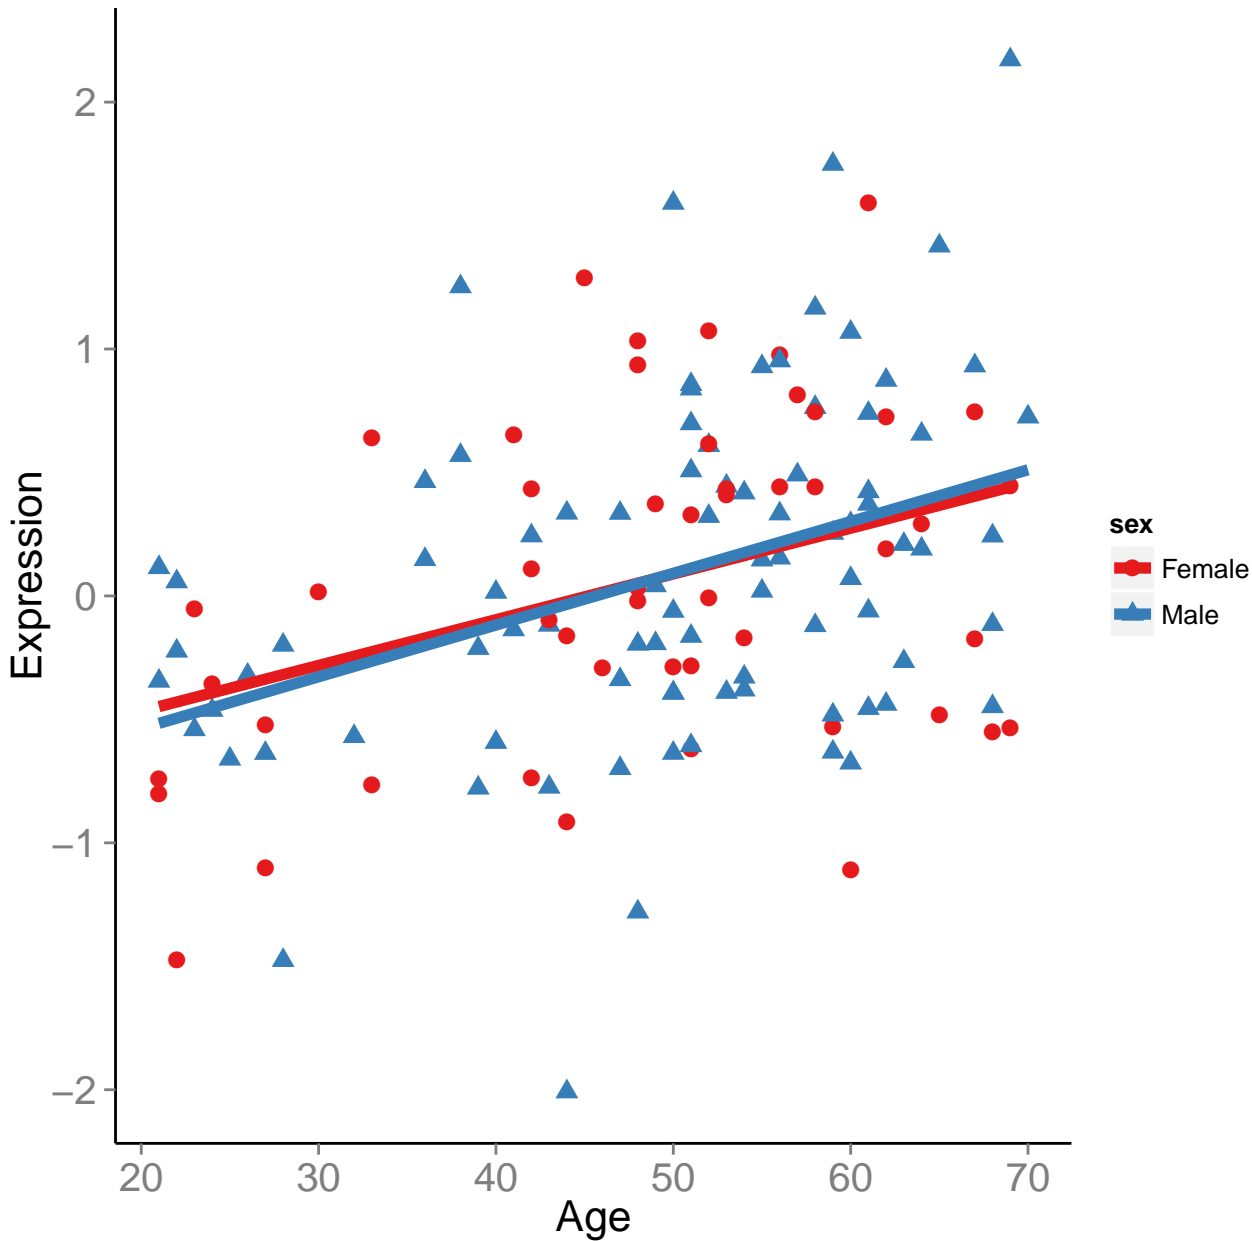

Nerve: EDA2R Pearson-R=0.70 Pval=2.62E-14

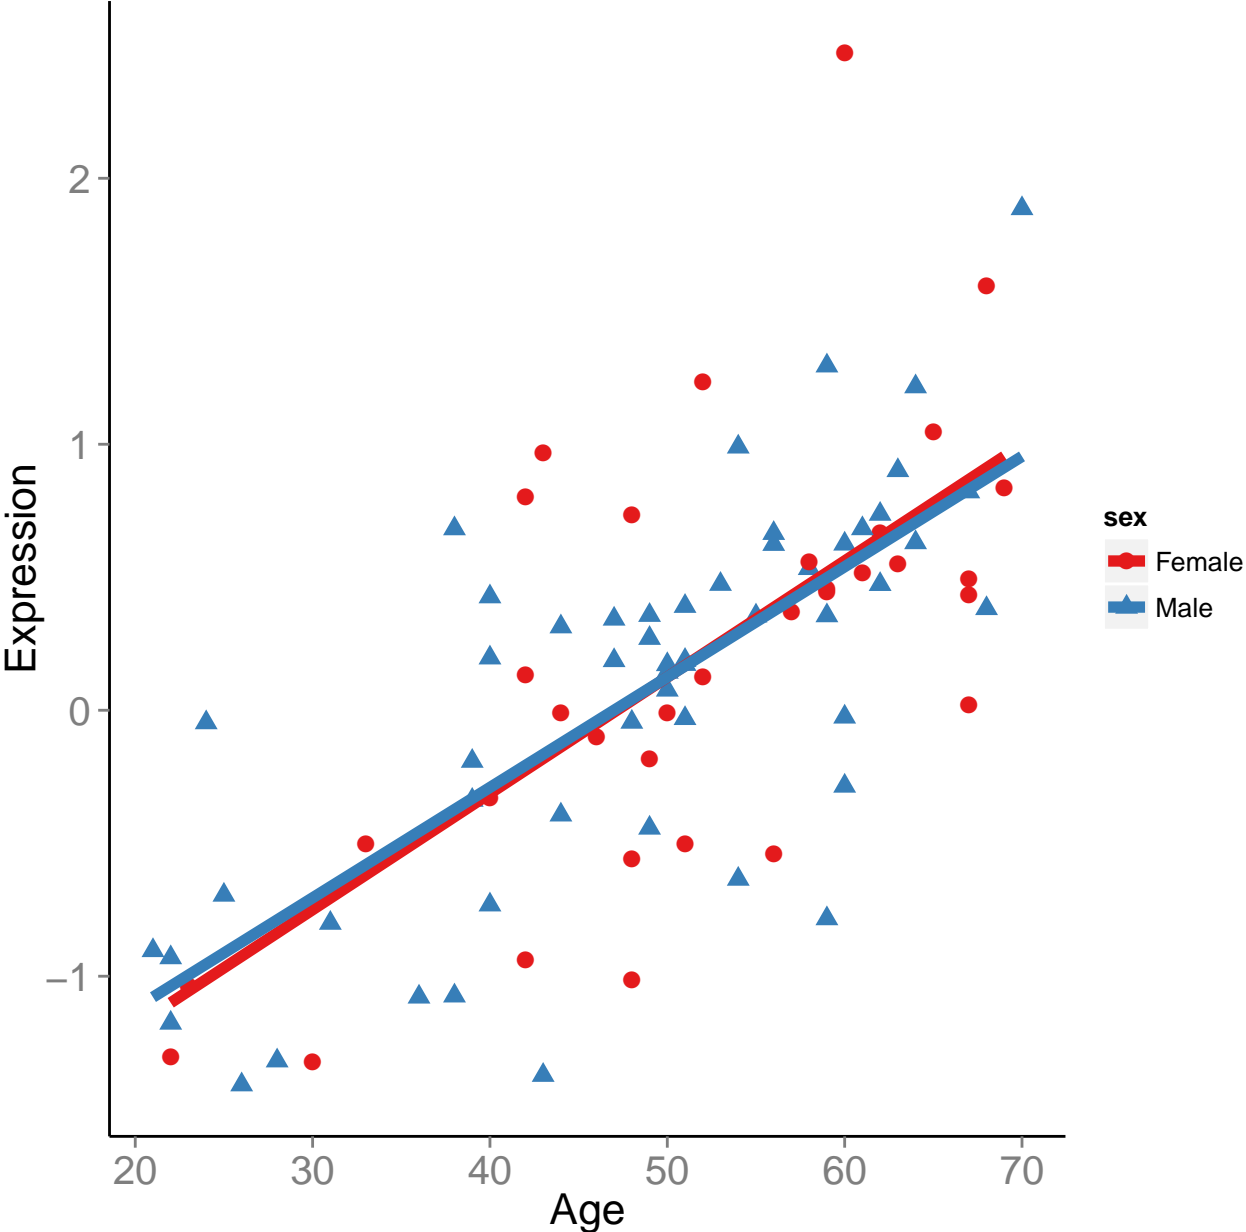

Nerve: ATXN1 Pearson-R=-0.65 Pval=4.78E-12

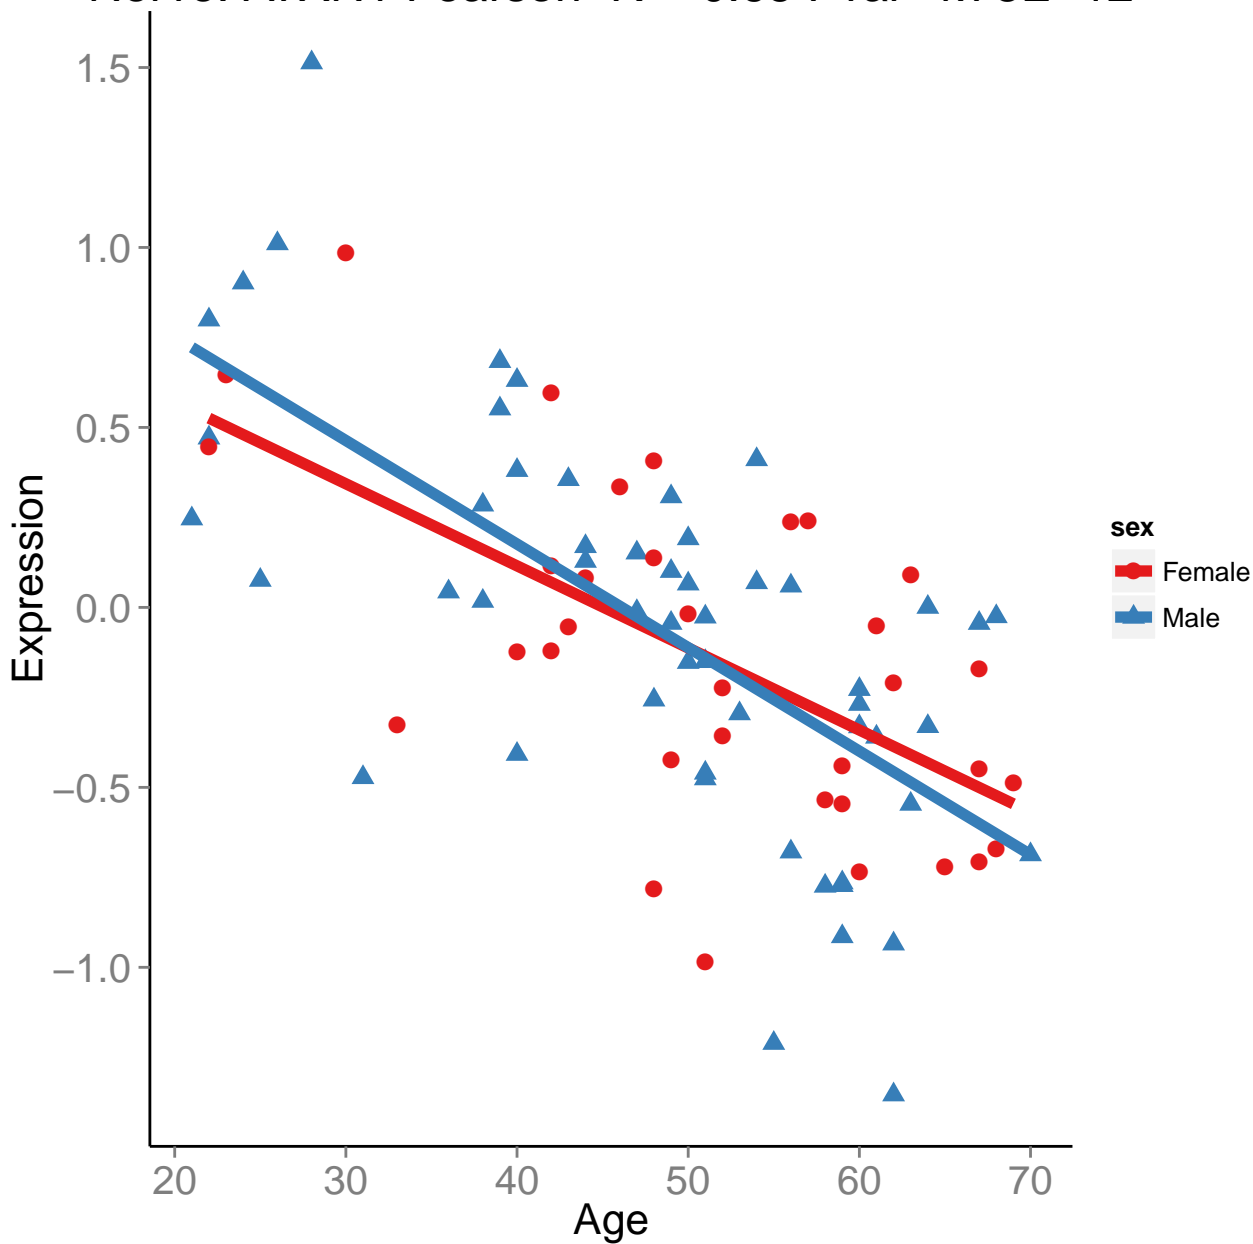

Nerve: C2orf88 Pearson-R=0.59 Pval=1.39E-09

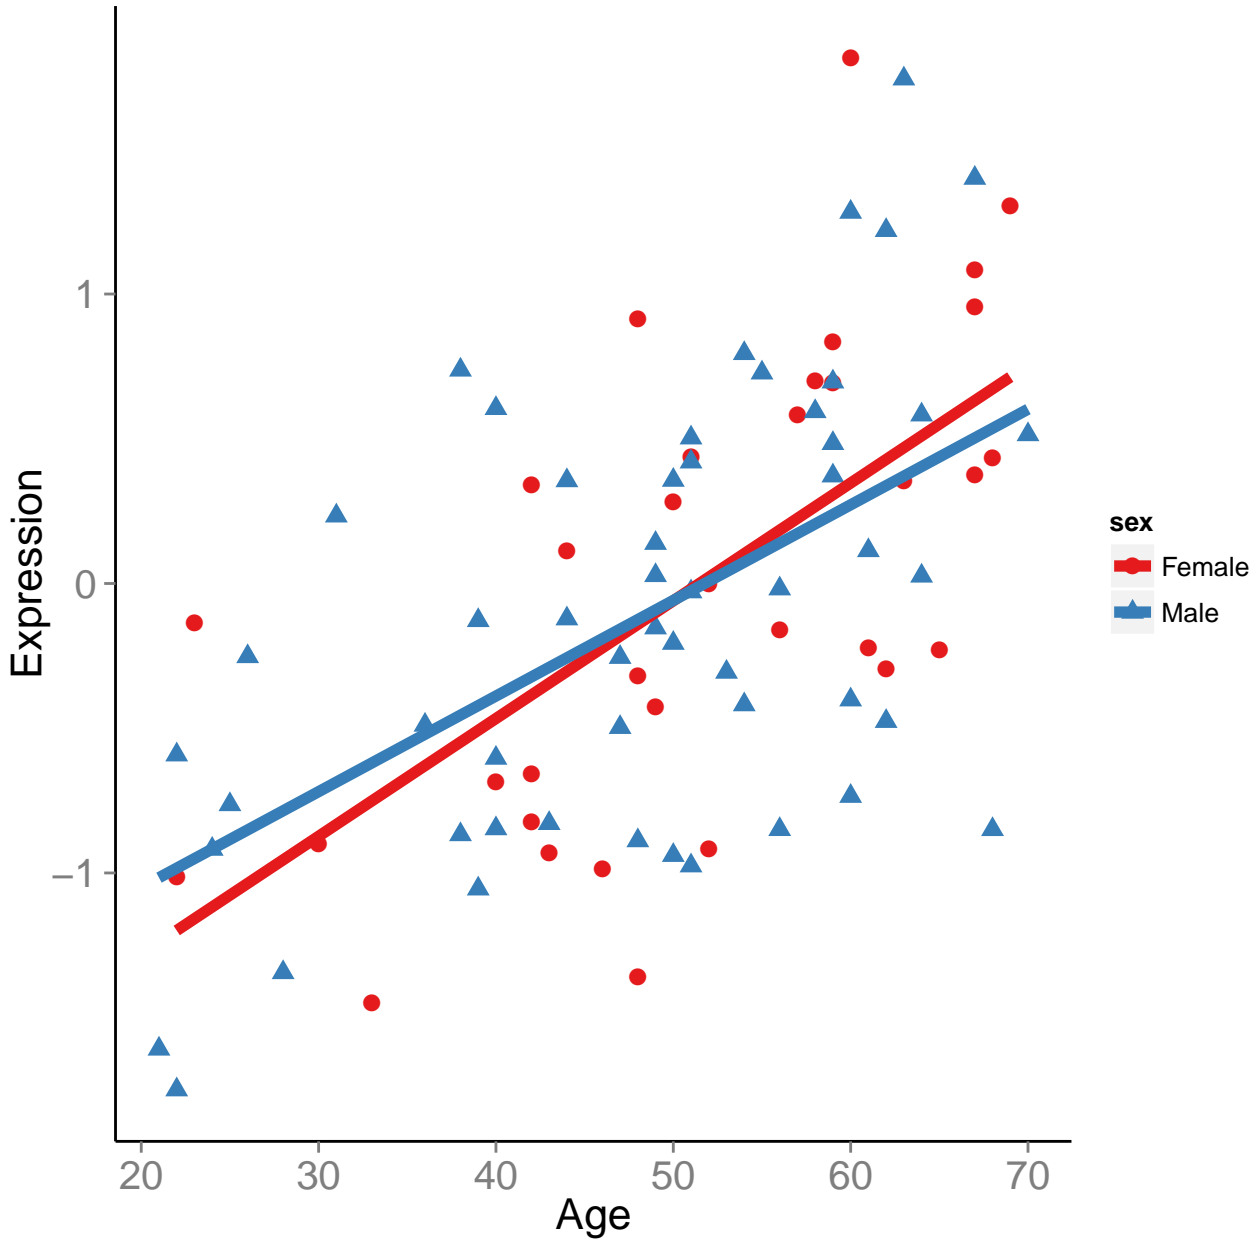



Nerve: ZMAT3 Pearson-R=0.57 Pval=6.07E-09

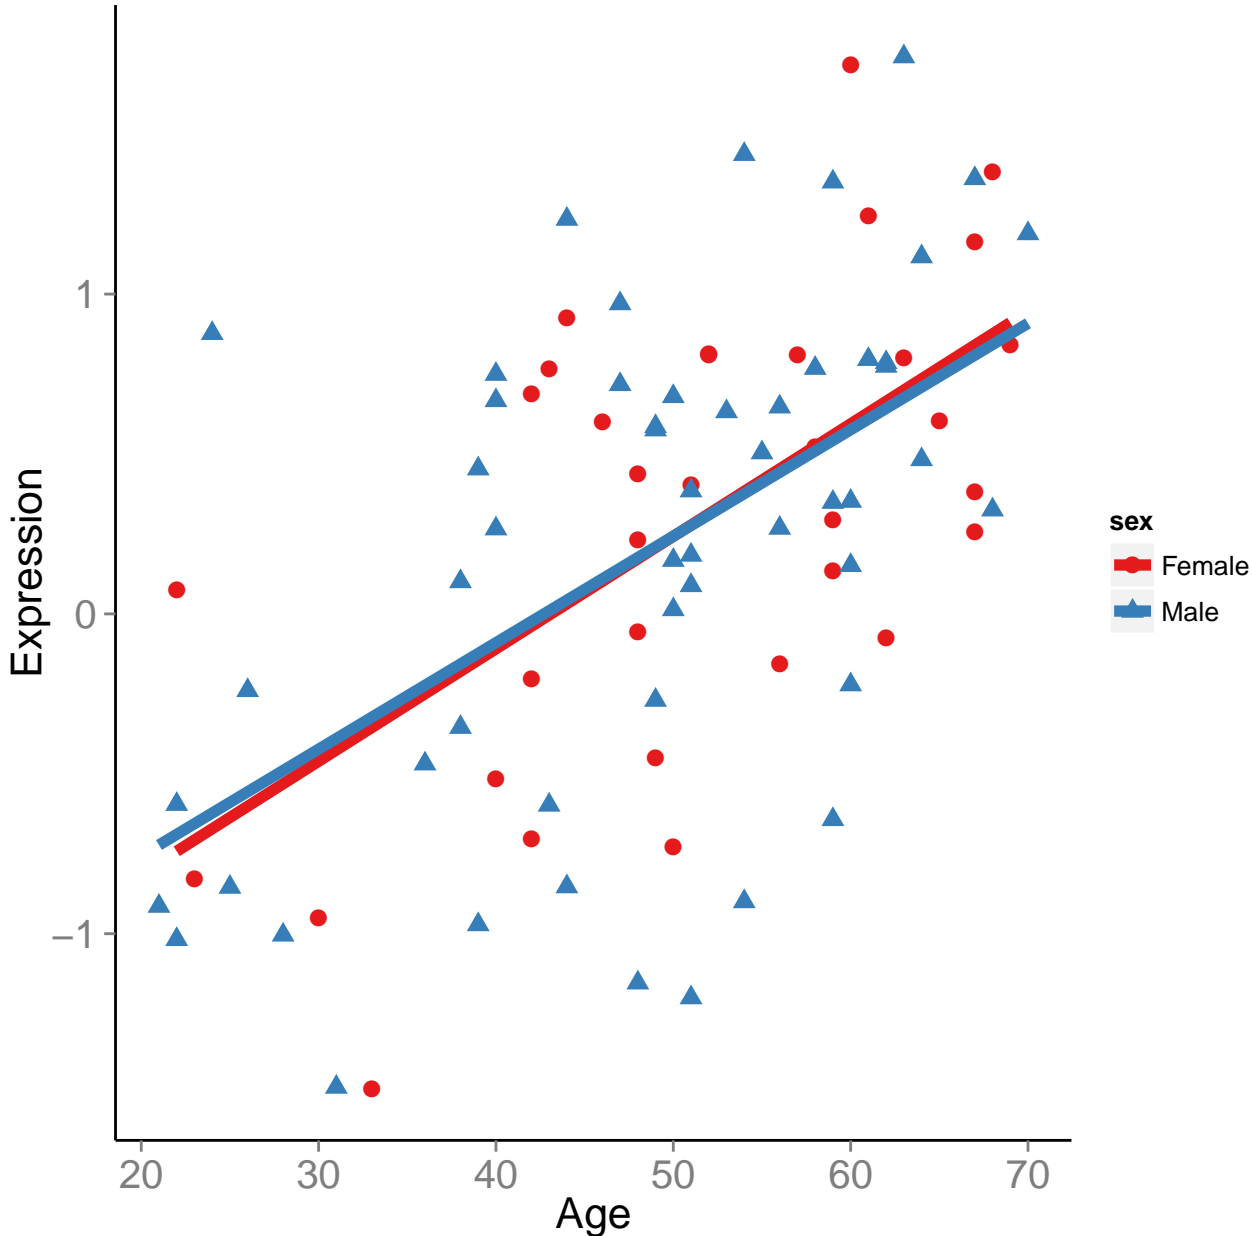

Nerve: RASGEF1C Pearson-R=0.55 Pval=2.30E-08

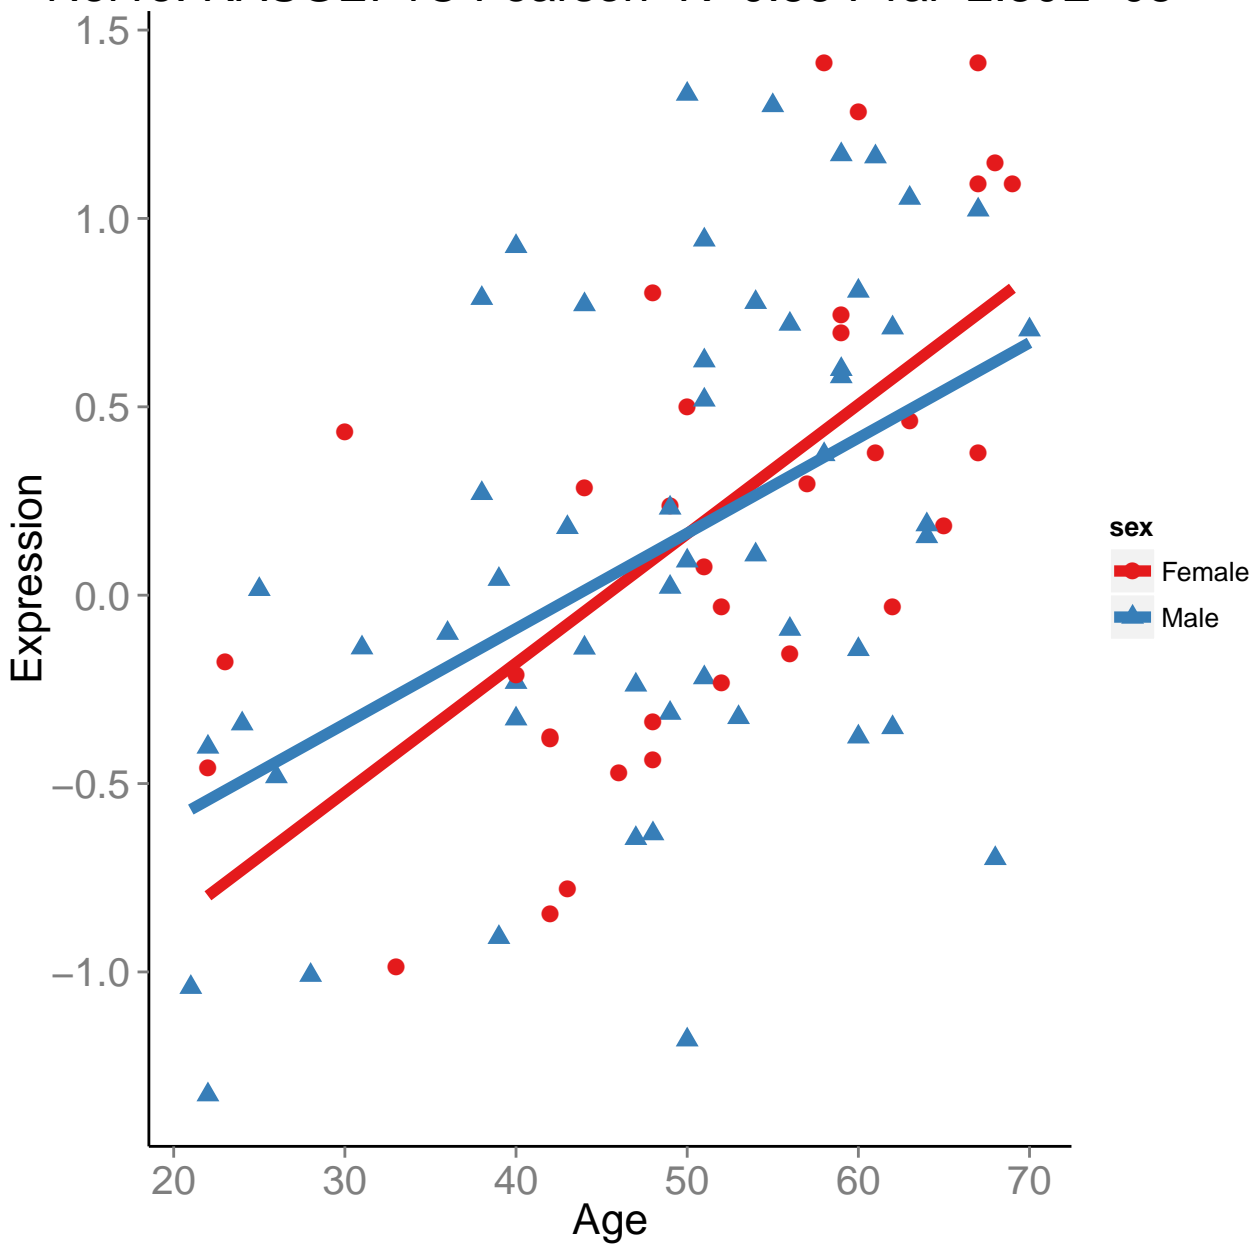

Nerve: RARRES2 Pearson-R=0.55 Pval=3.65E-08

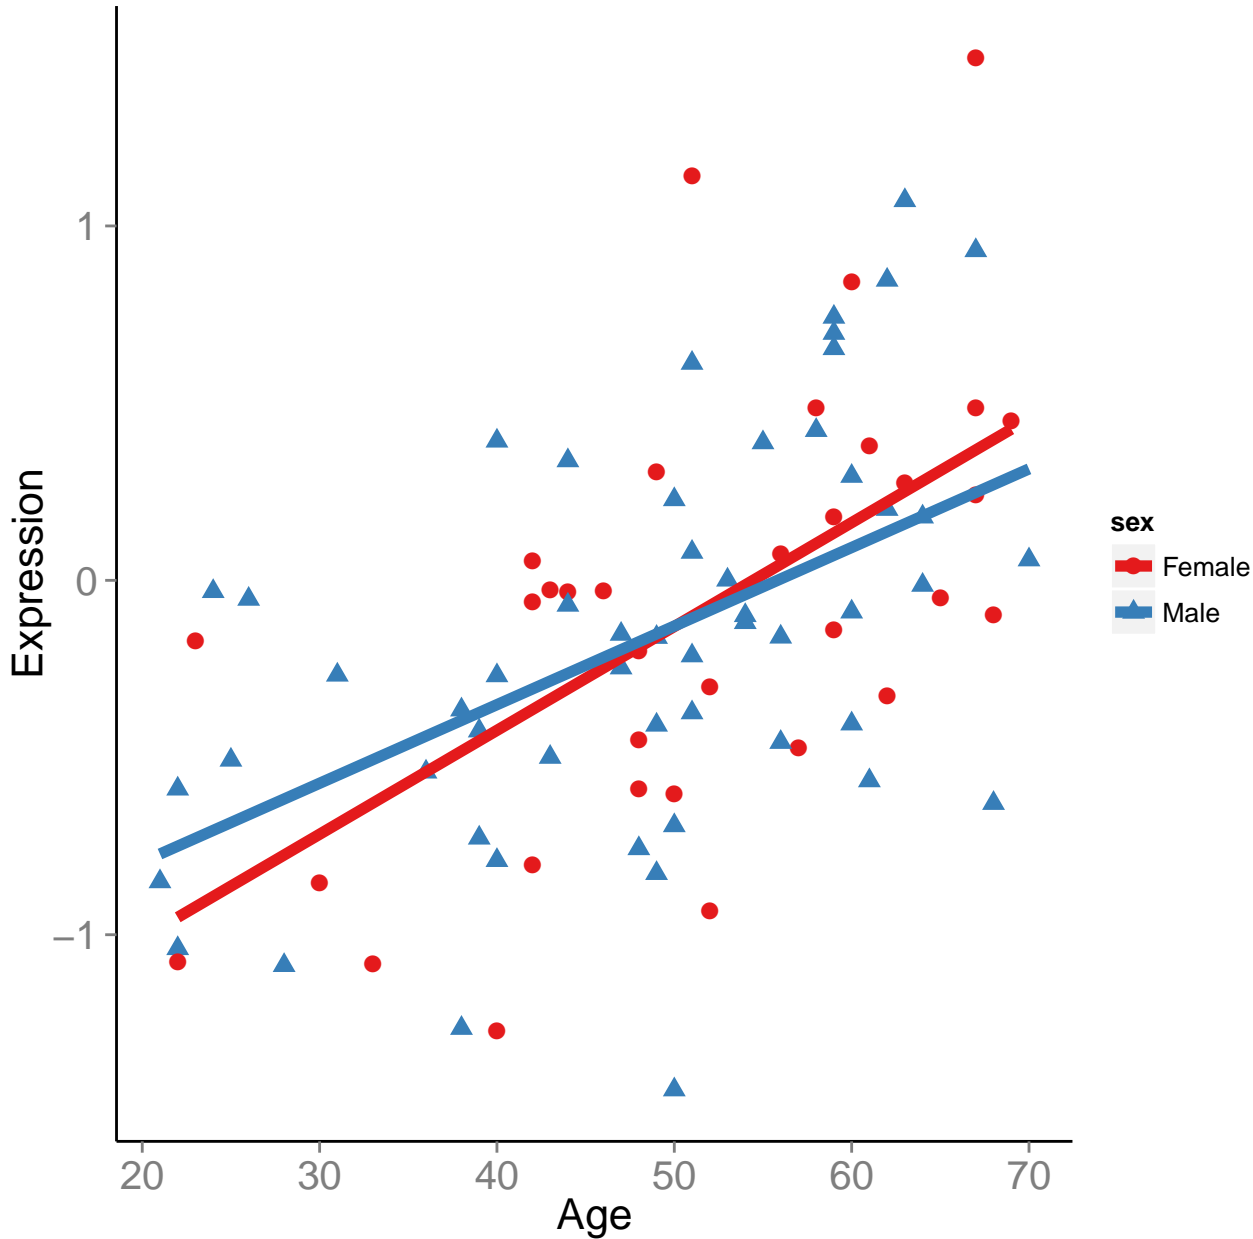

Nerve: TLE1 Pearson-R=0.55 Pval=3.40E-08

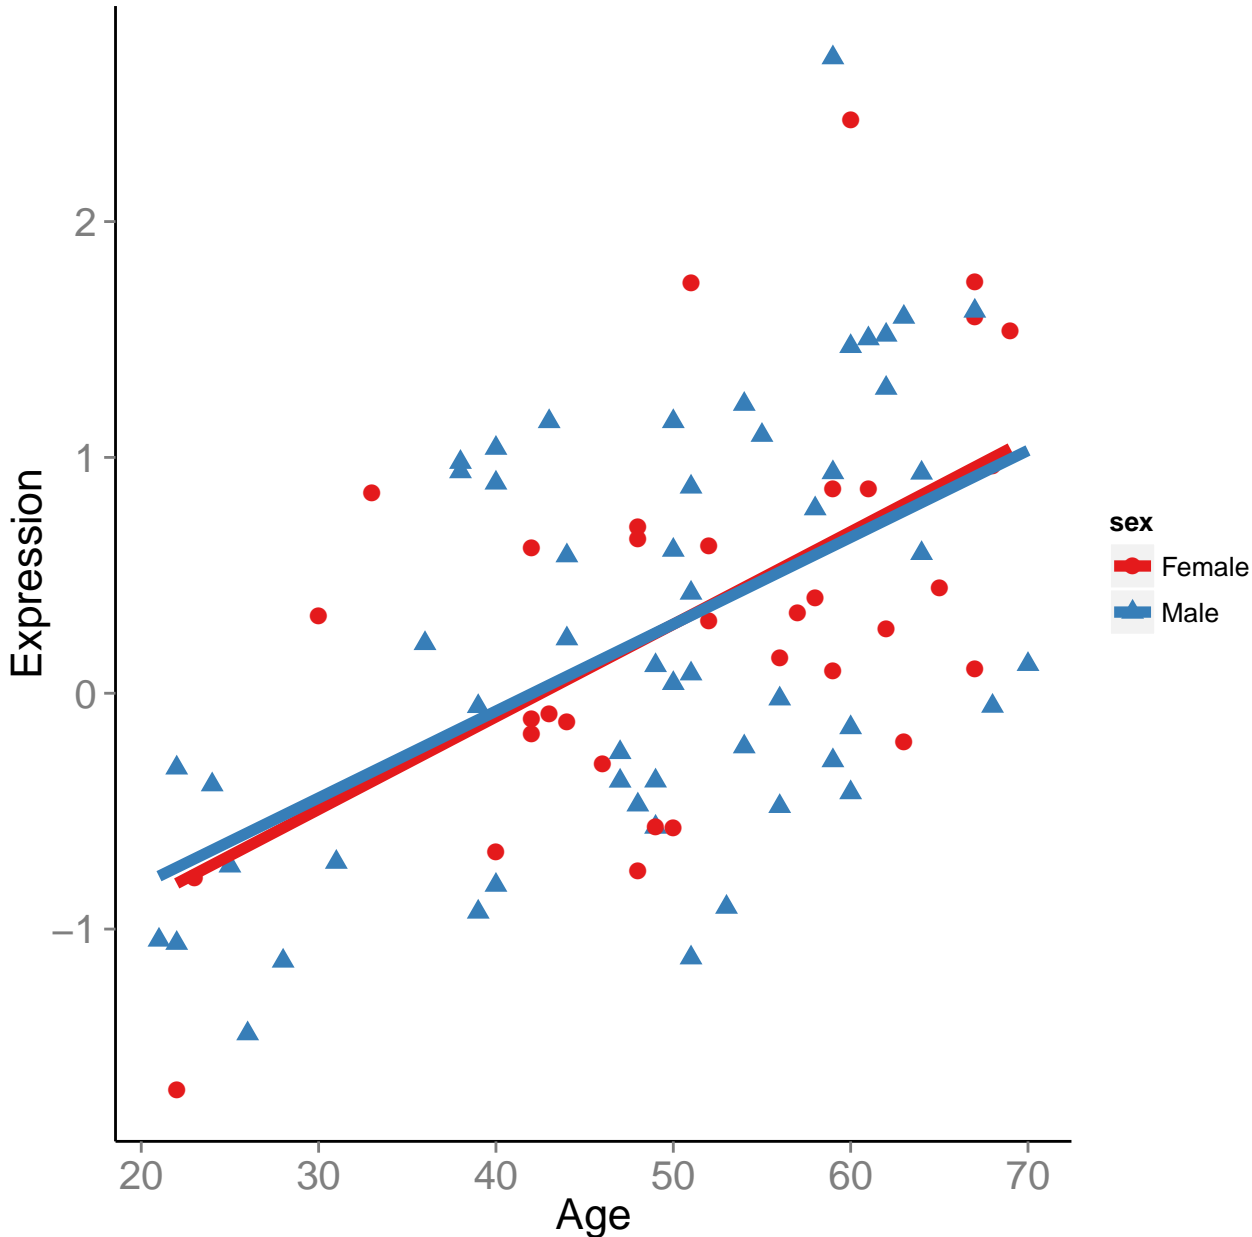

Nerve: CYFIP2 Pearson-R=0.55 Pval=3.76E-08

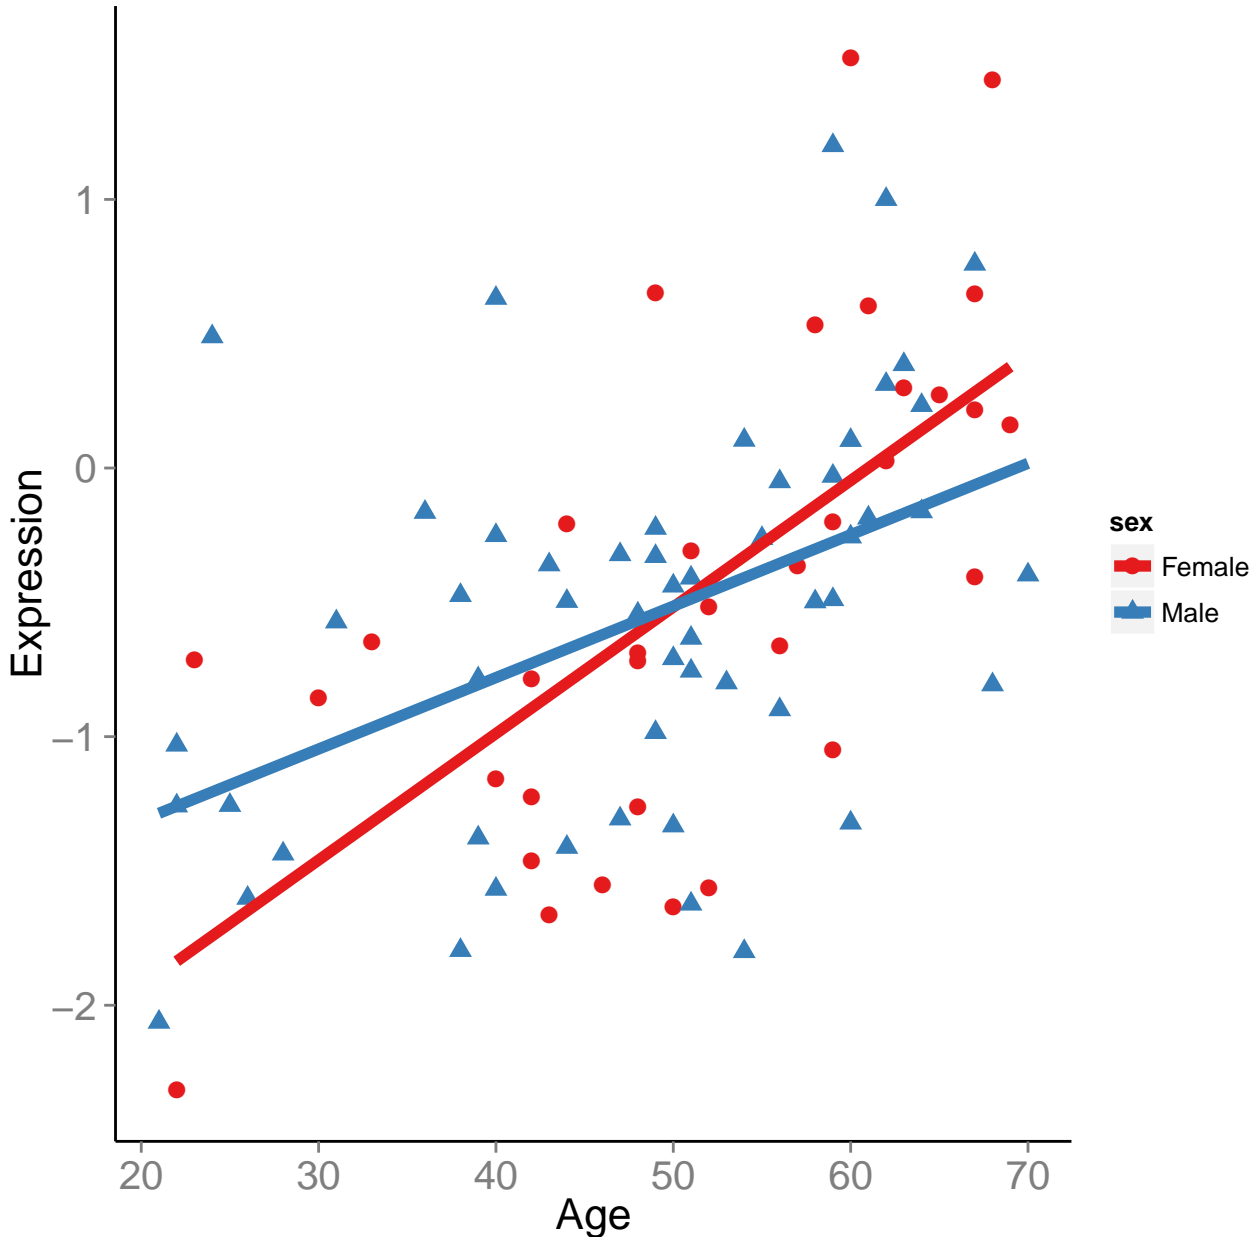

Nerve: ZNF549 Pearson-R=-0.54 Pval=4.17E-08

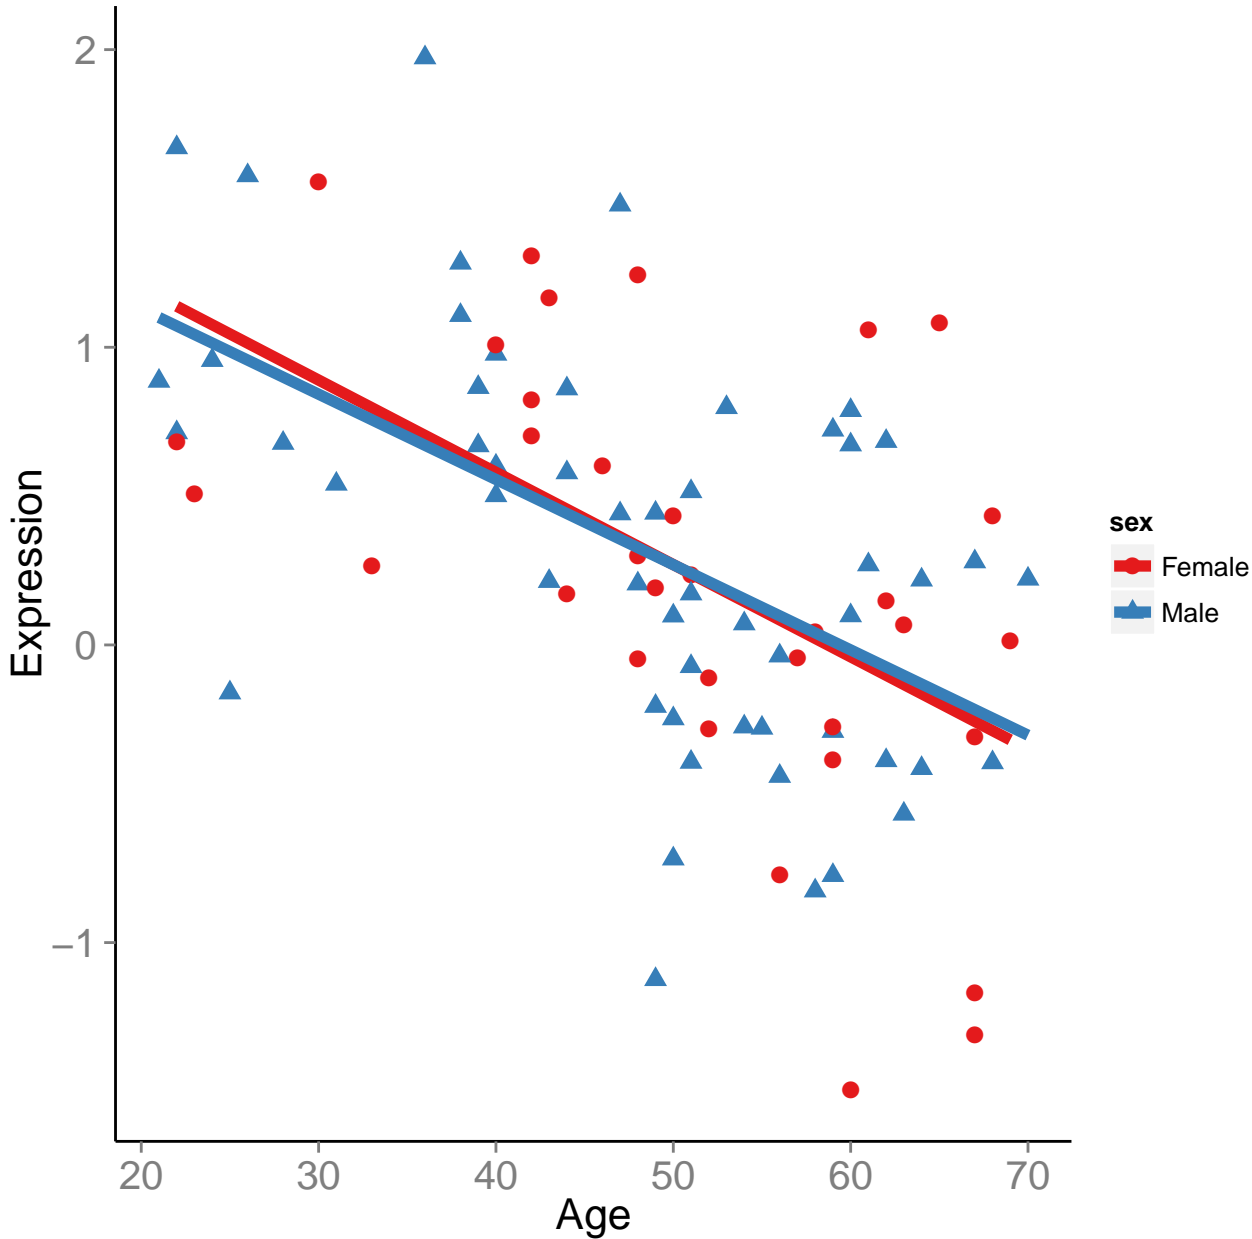

Nerve: NRIP2 Pearson-R=-0.54 Pval=5.24E-08

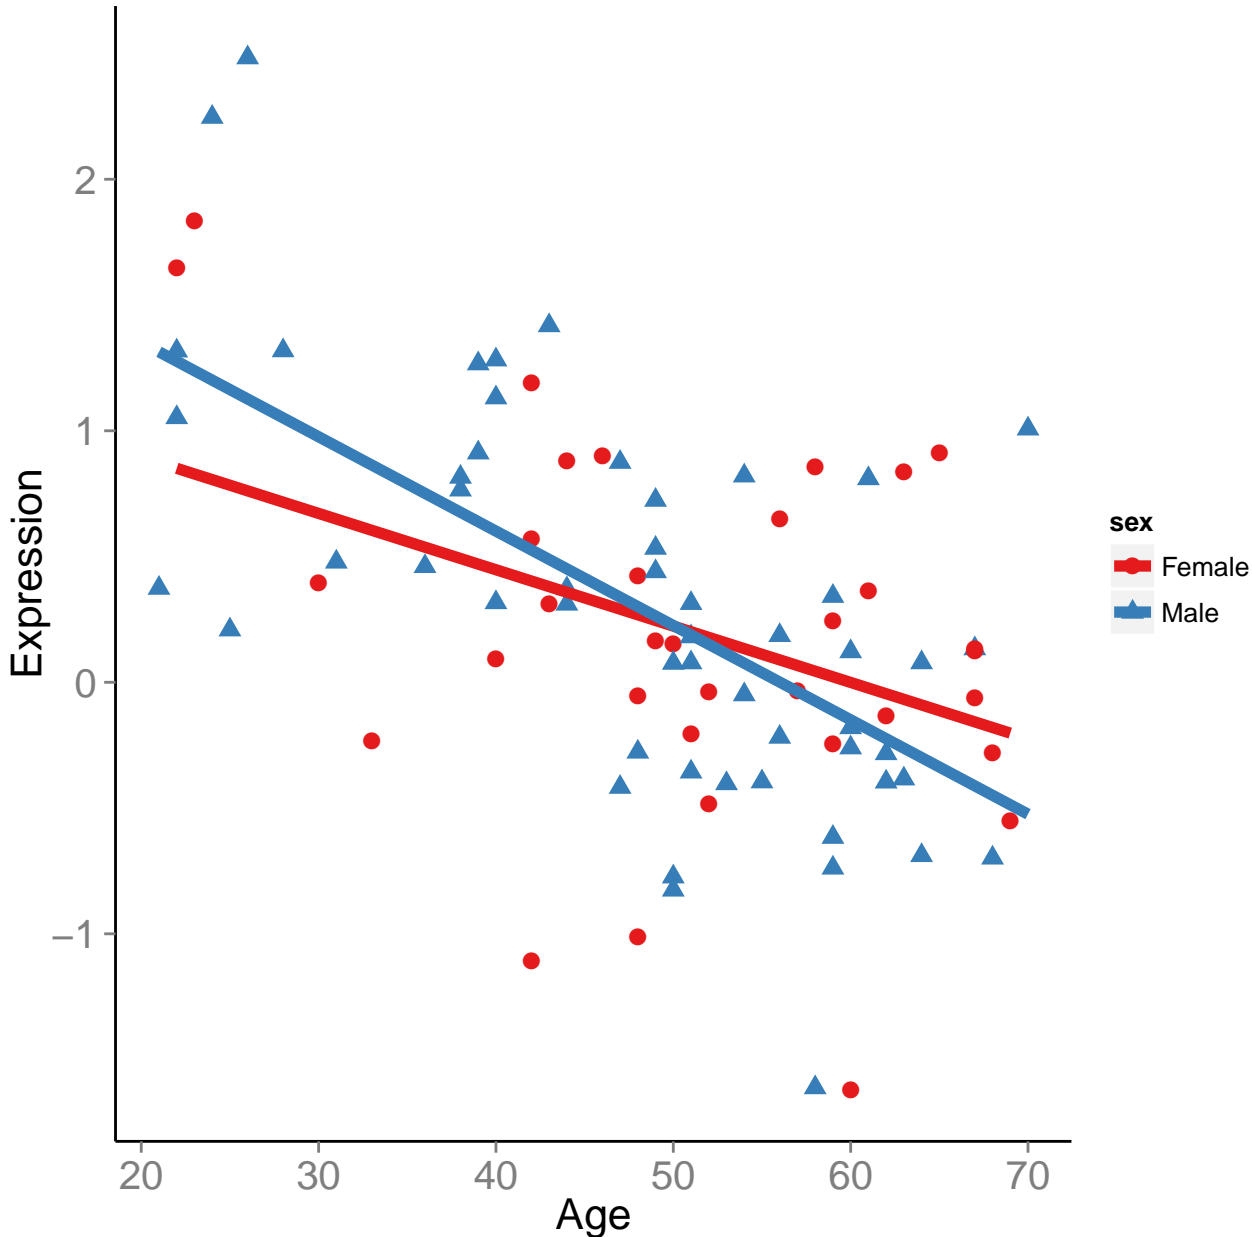

Nerve: COBL Pearson-R=0.54 Pval=6.18E-08

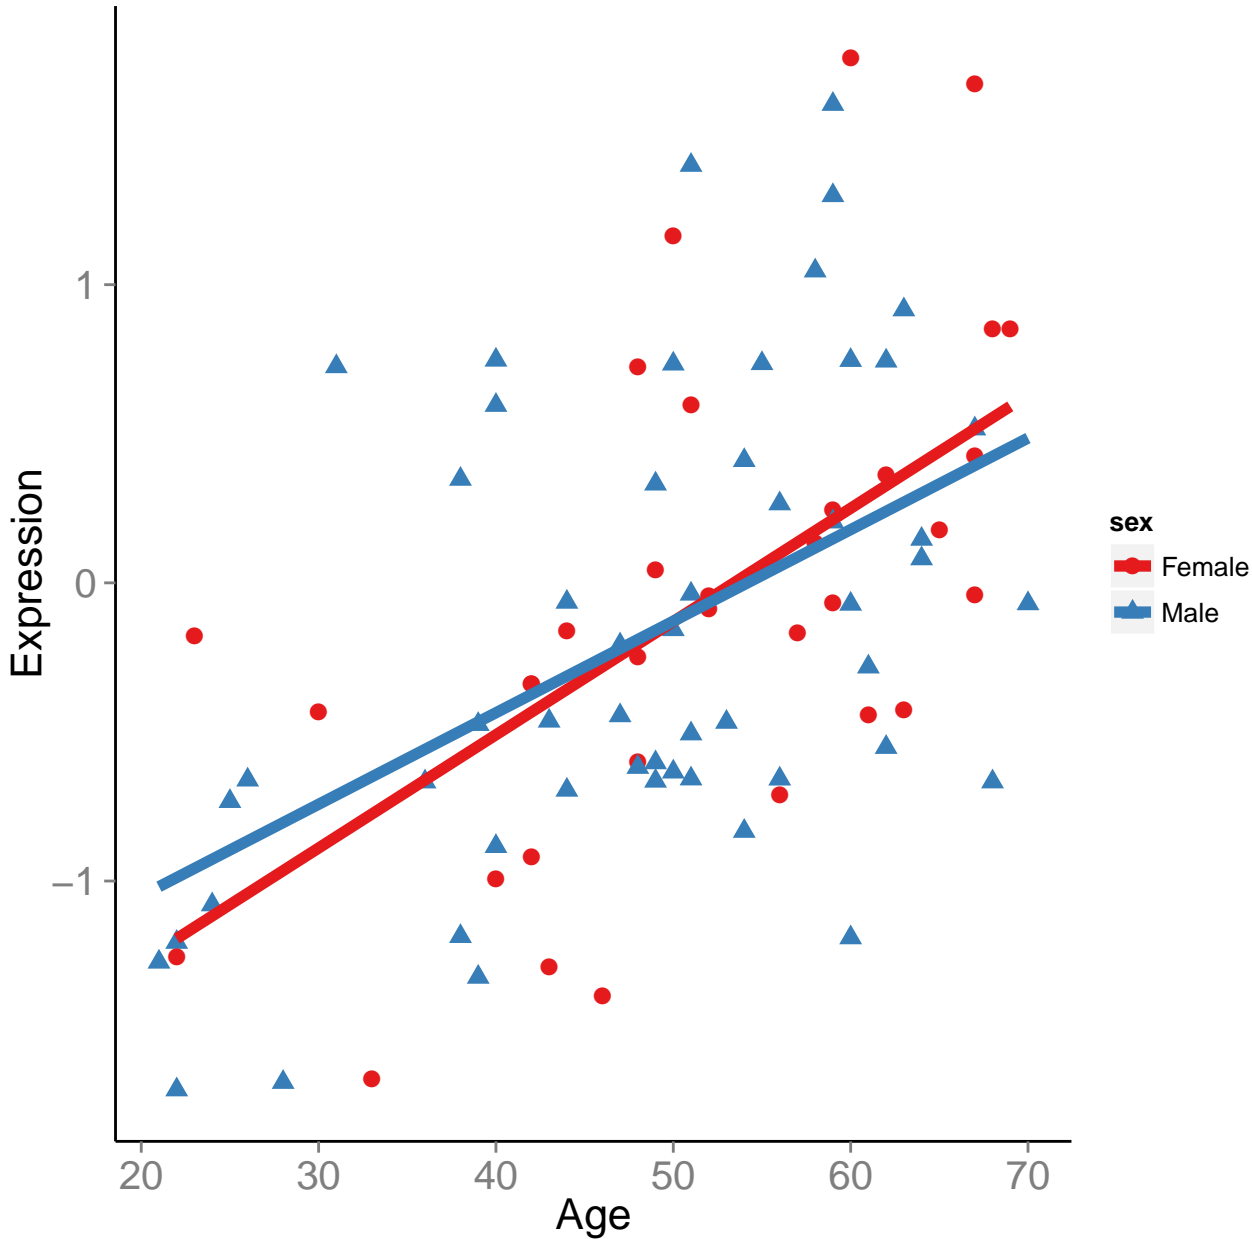



Nerve: MYOT Pearson-R=0.53 Pval=8.18E-08

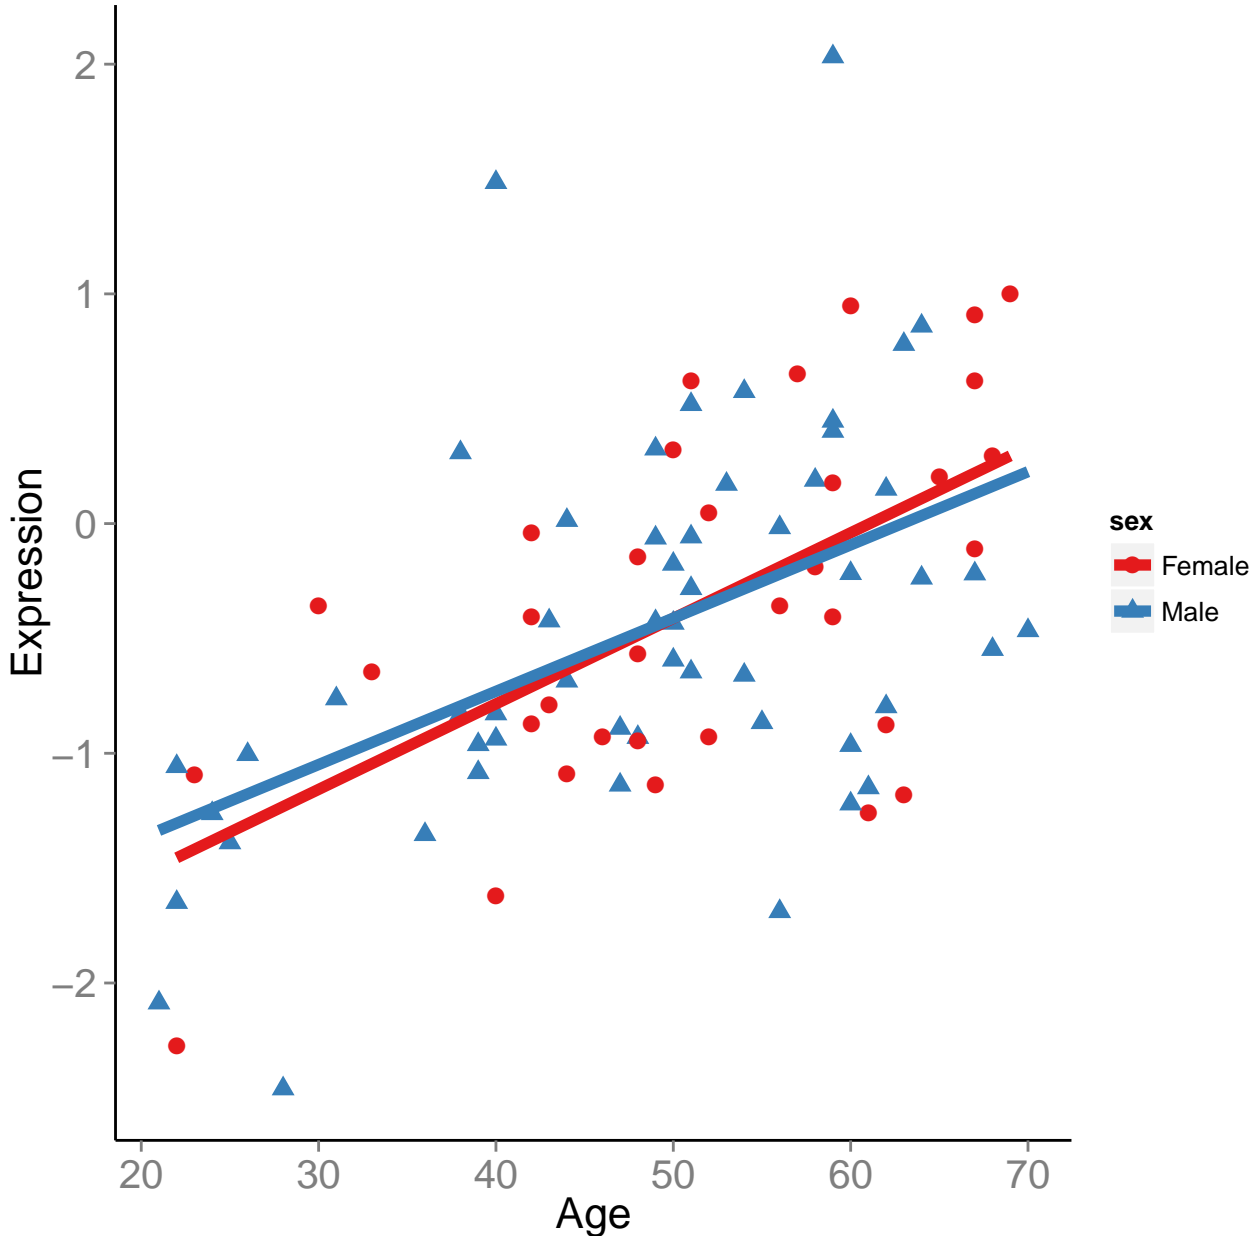

Nerve: NRN1 Pearson-R=0.53 Pval=8.29E-08

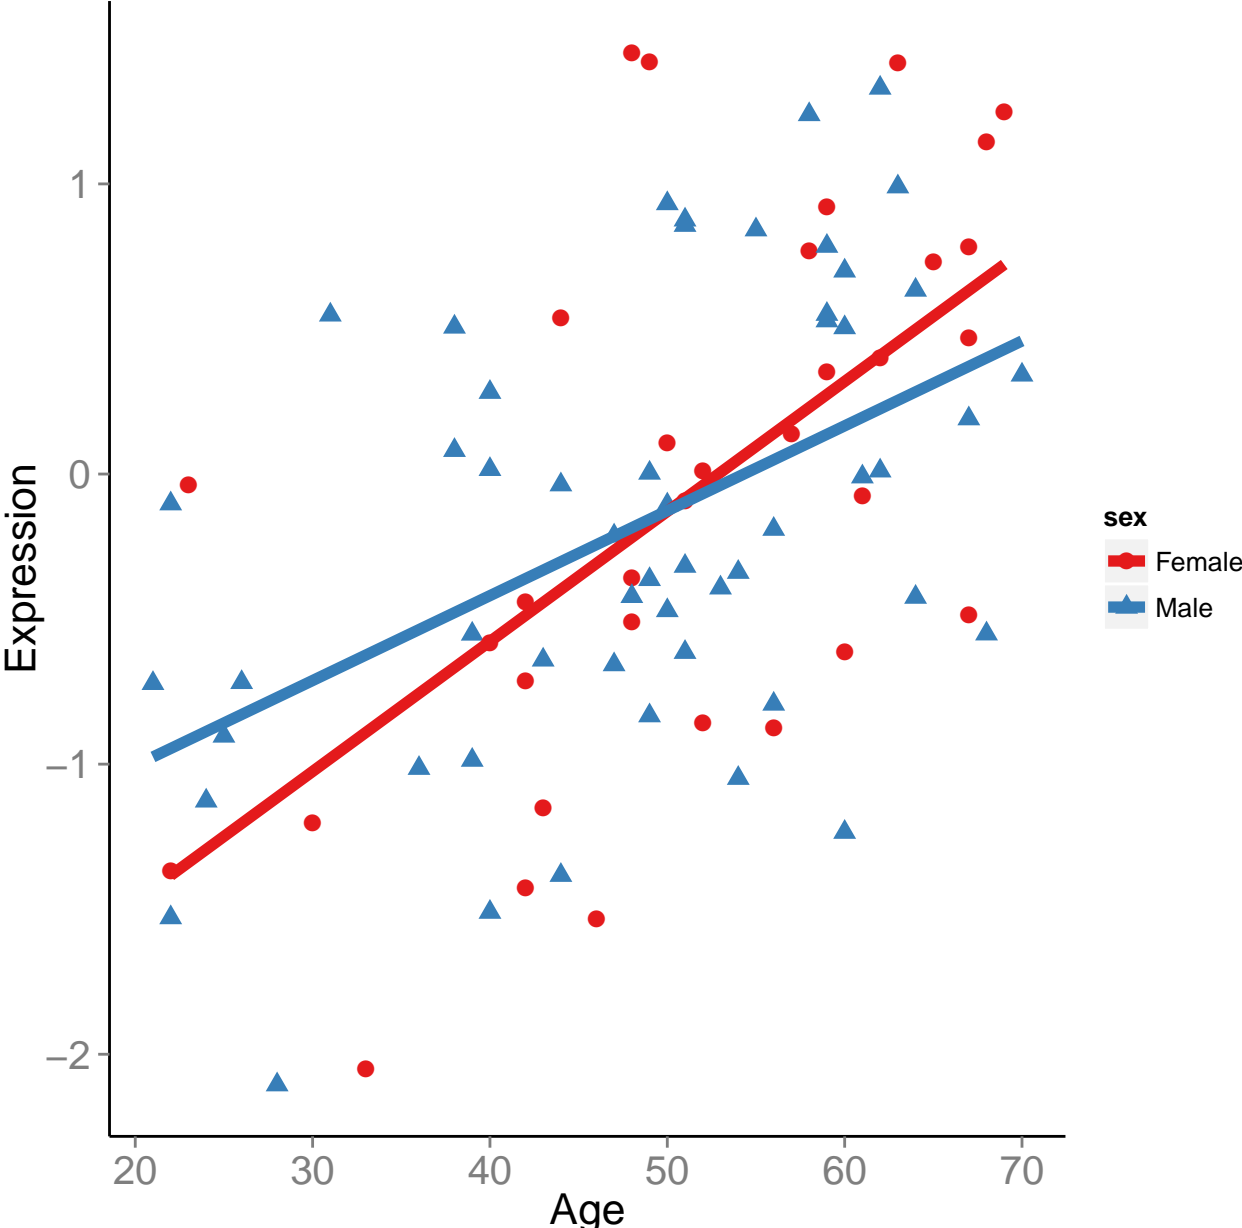

Nerve: MAGI2 Pearson-R=-0.53 Pval=1.12E-07

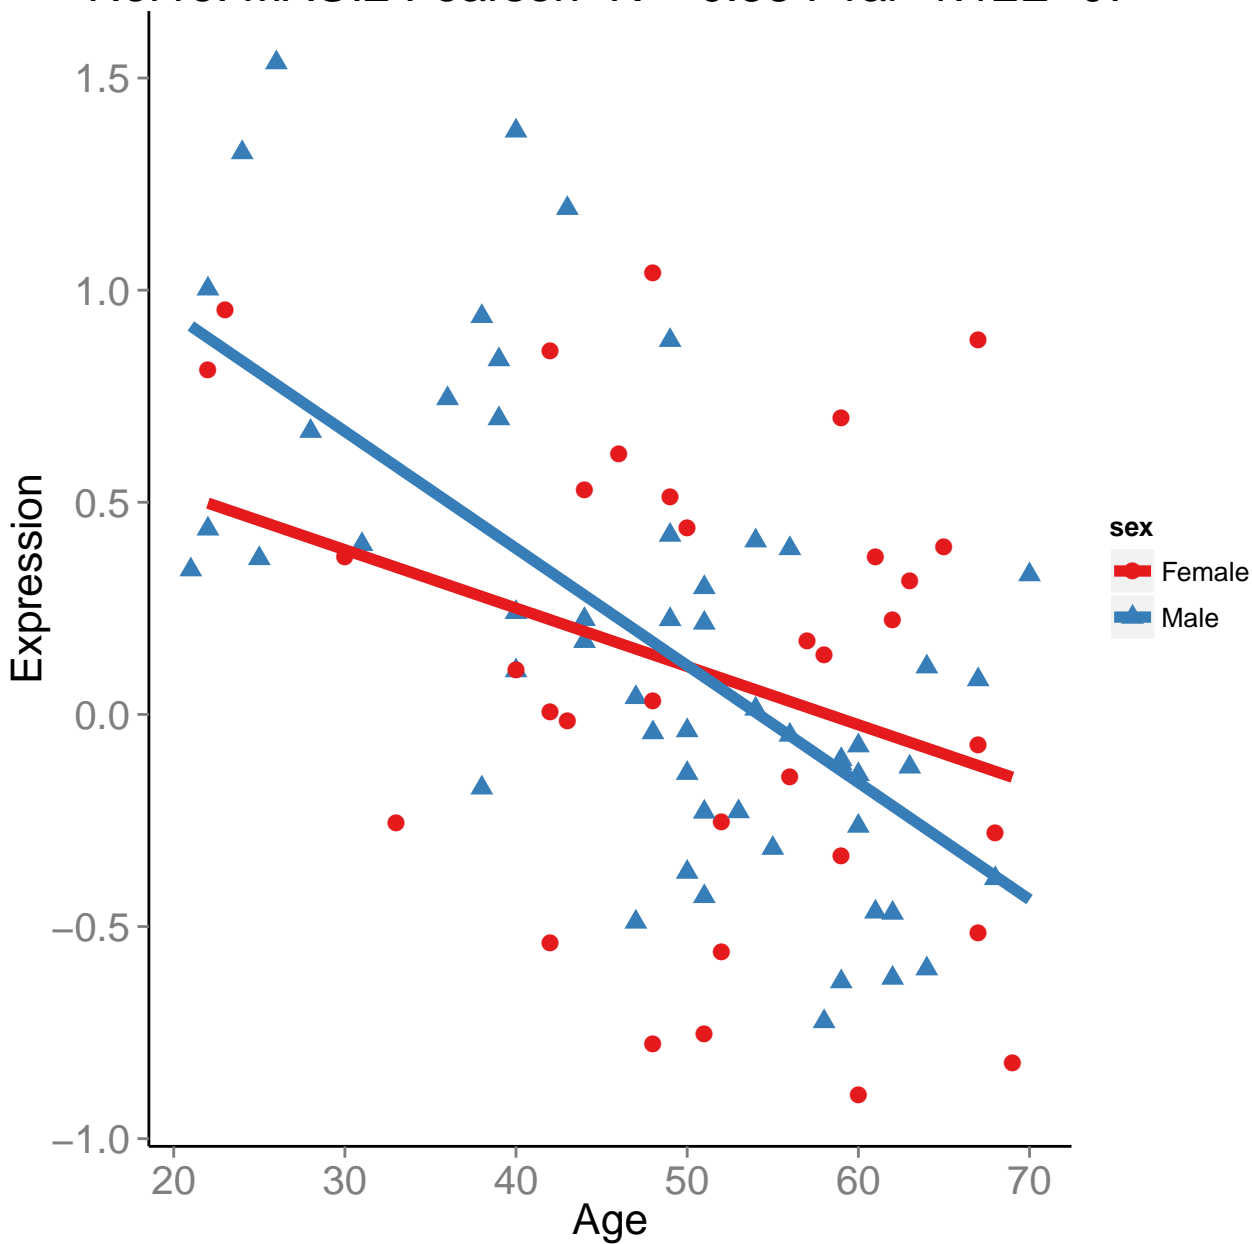

Nerve: MUM1L1 Pearson-R=0.52 Pval=1.57E-07

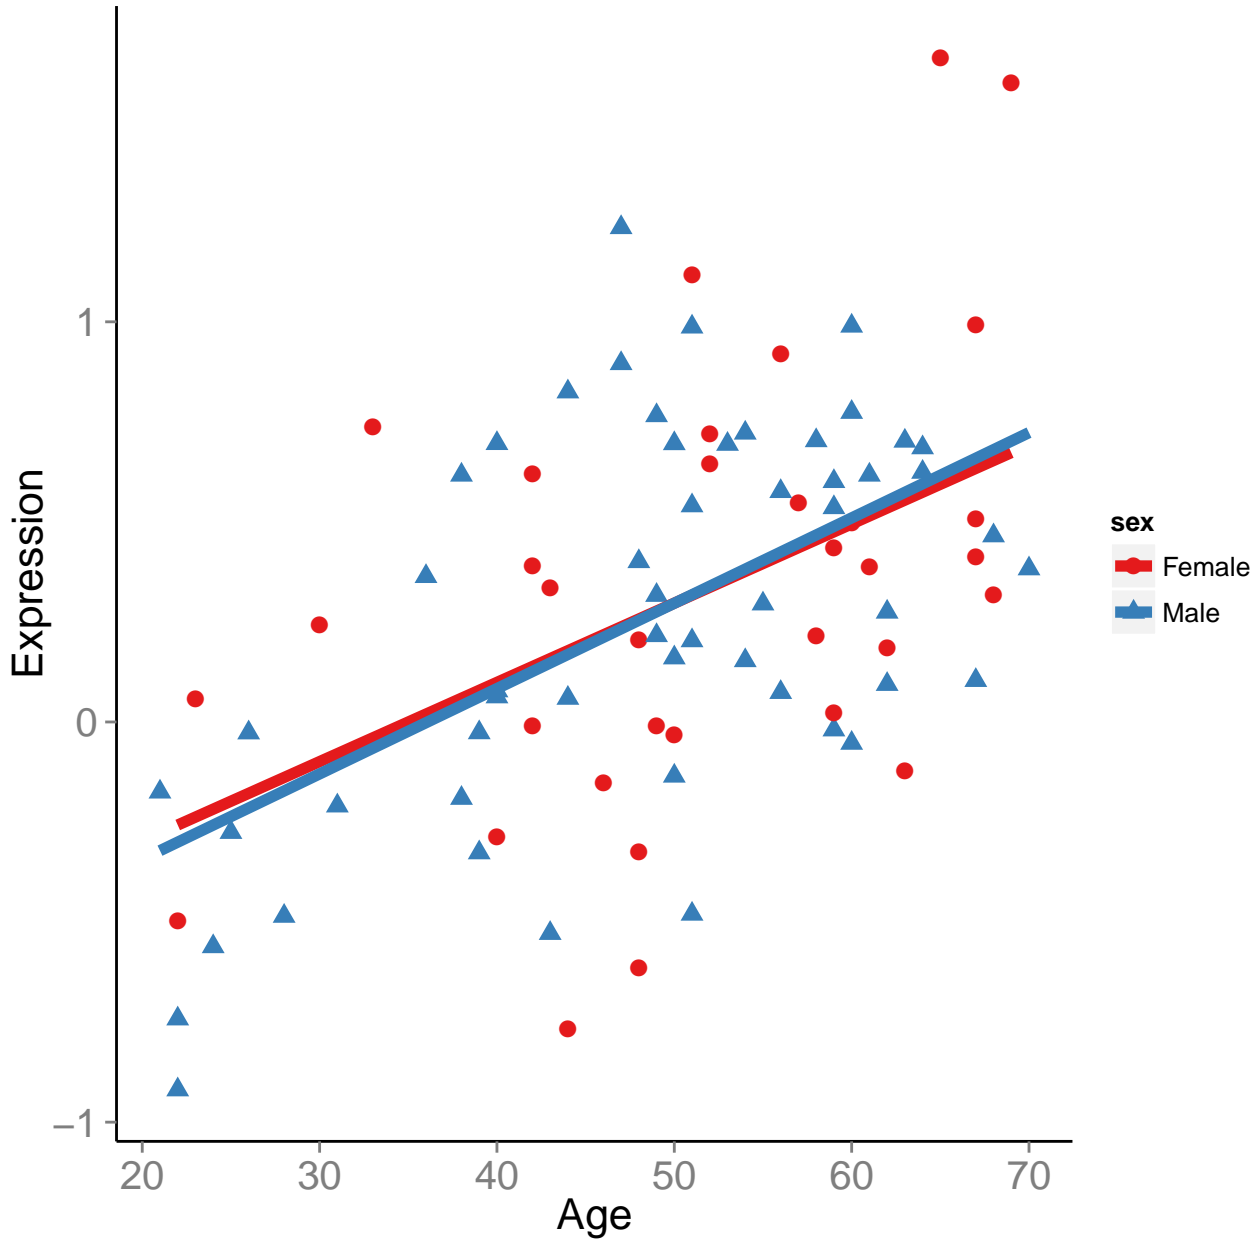

Nerve: MCOLN3 Pearson-R=-0.53 Pval=1.51E-07

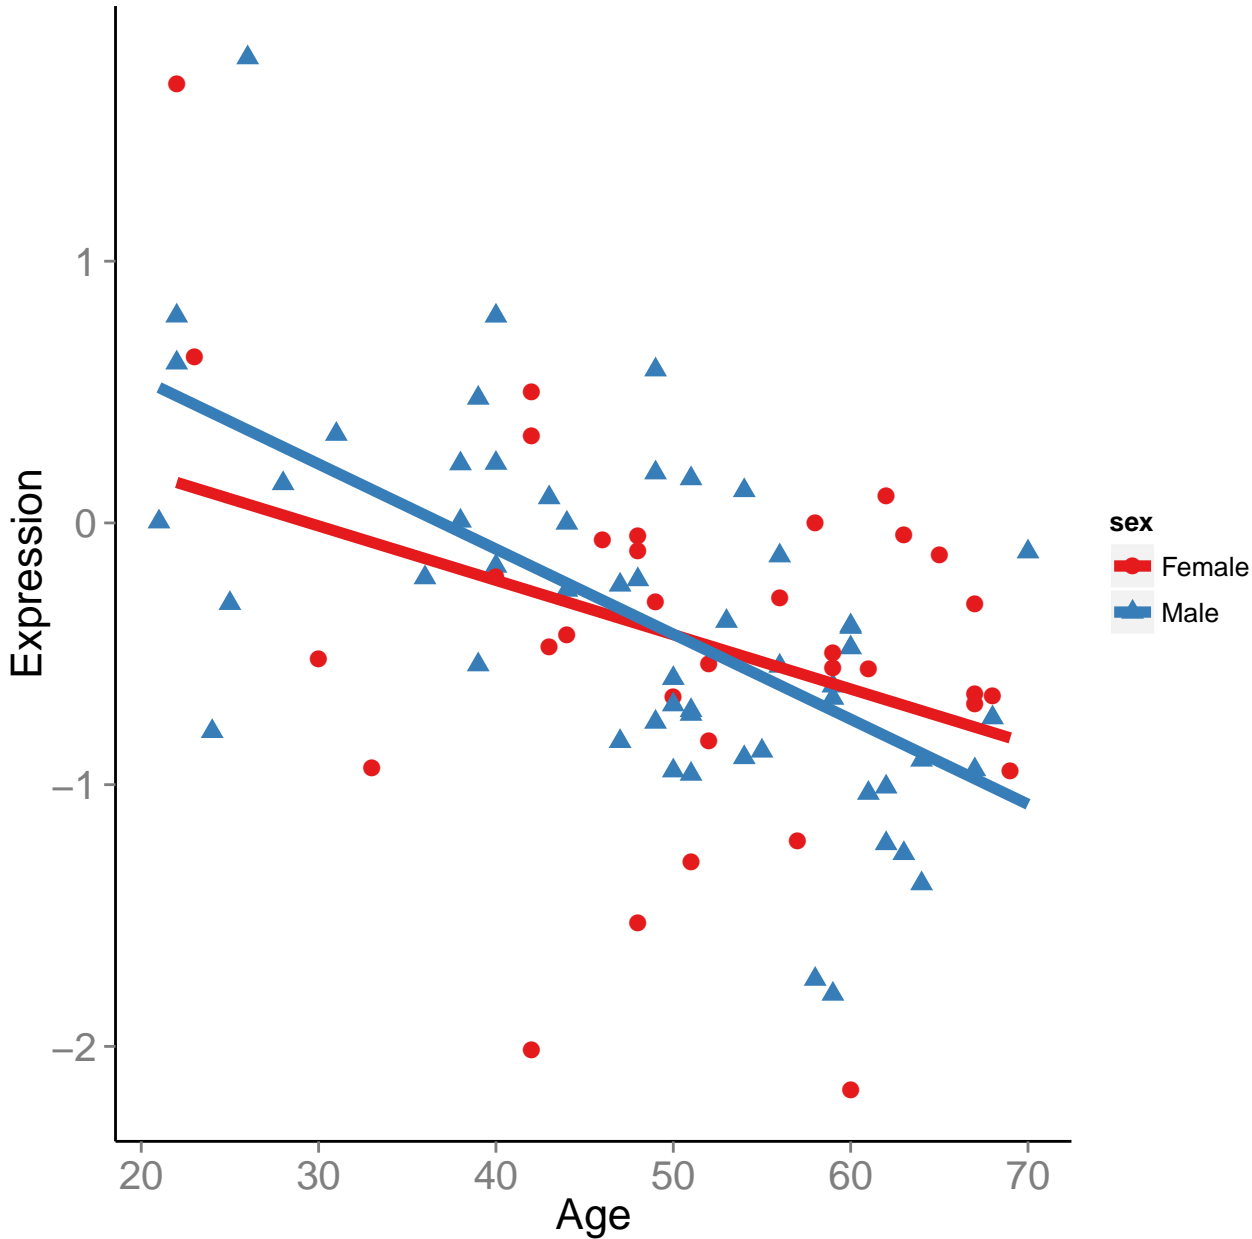

Nerve: NCAM1 Pearson-R=0.52 Pval=1.72E-07

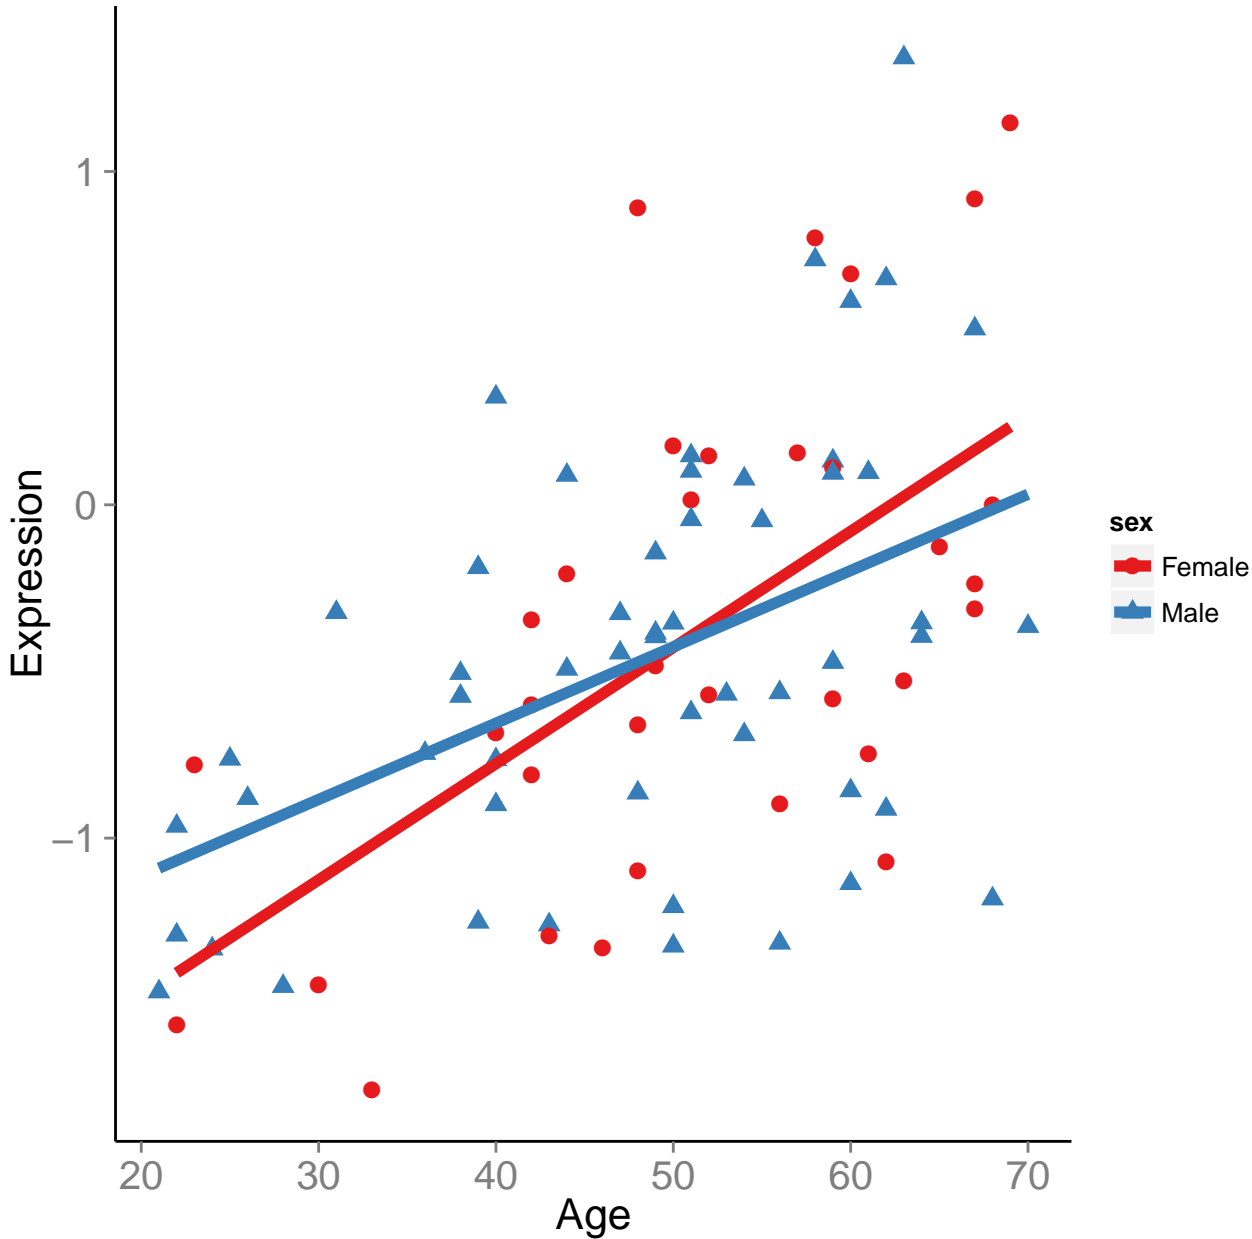

Nerve: HTRA1 Pearson-R=0.52 Pval=1.84E-07

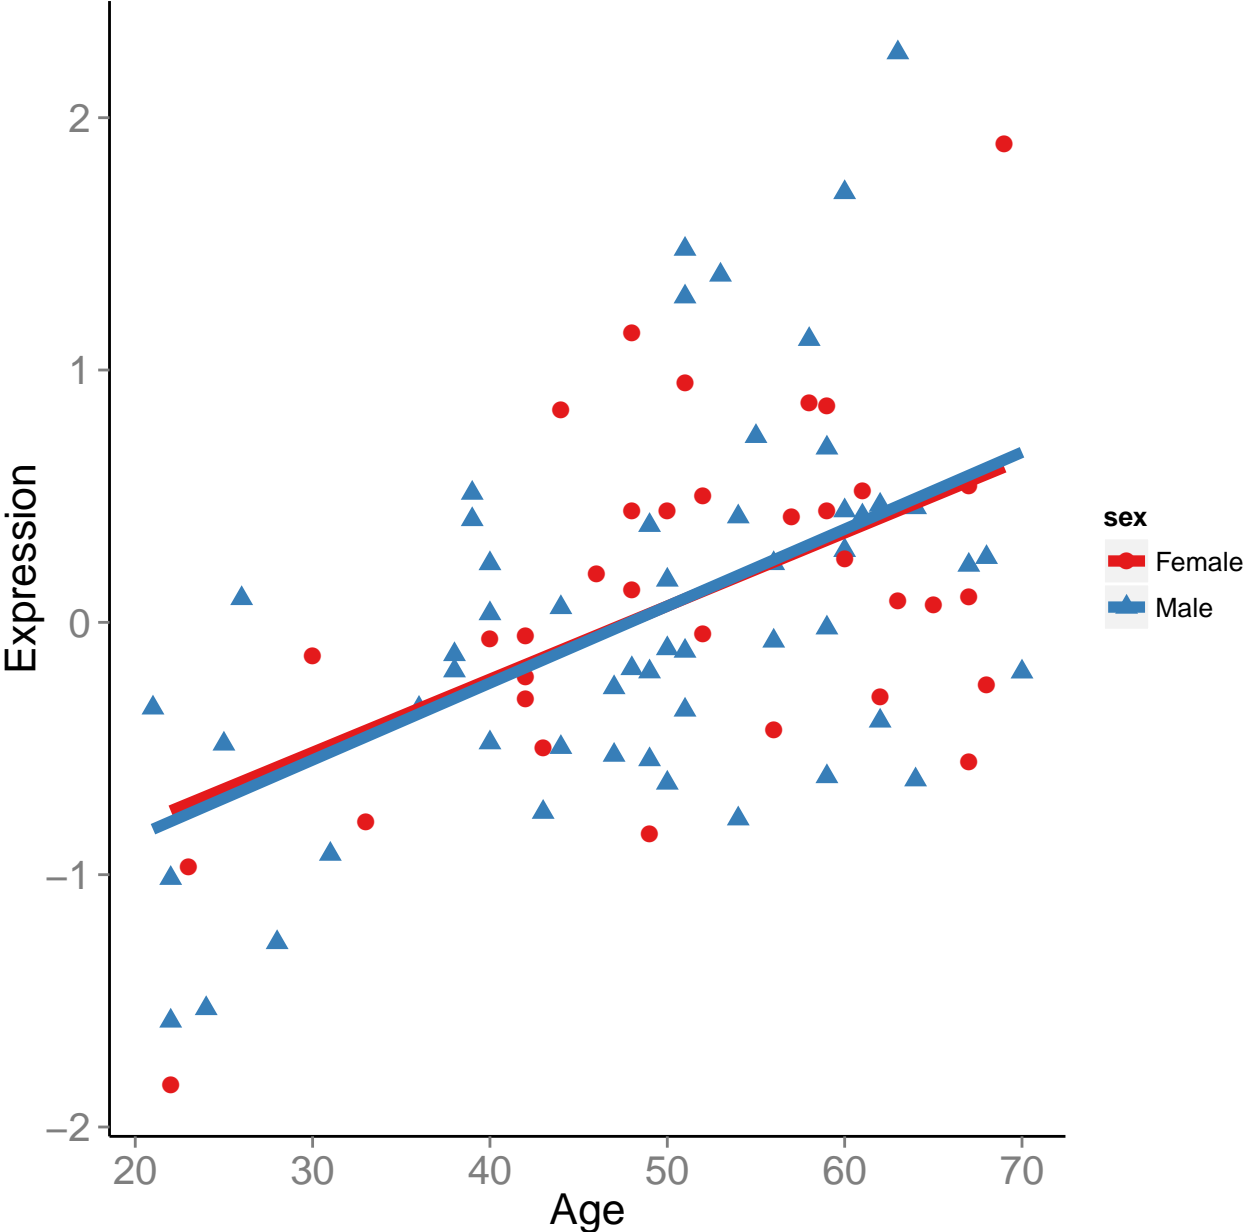

Nerve: HS1BP3 Pearson-R=0.52 Pval=2.27E-07

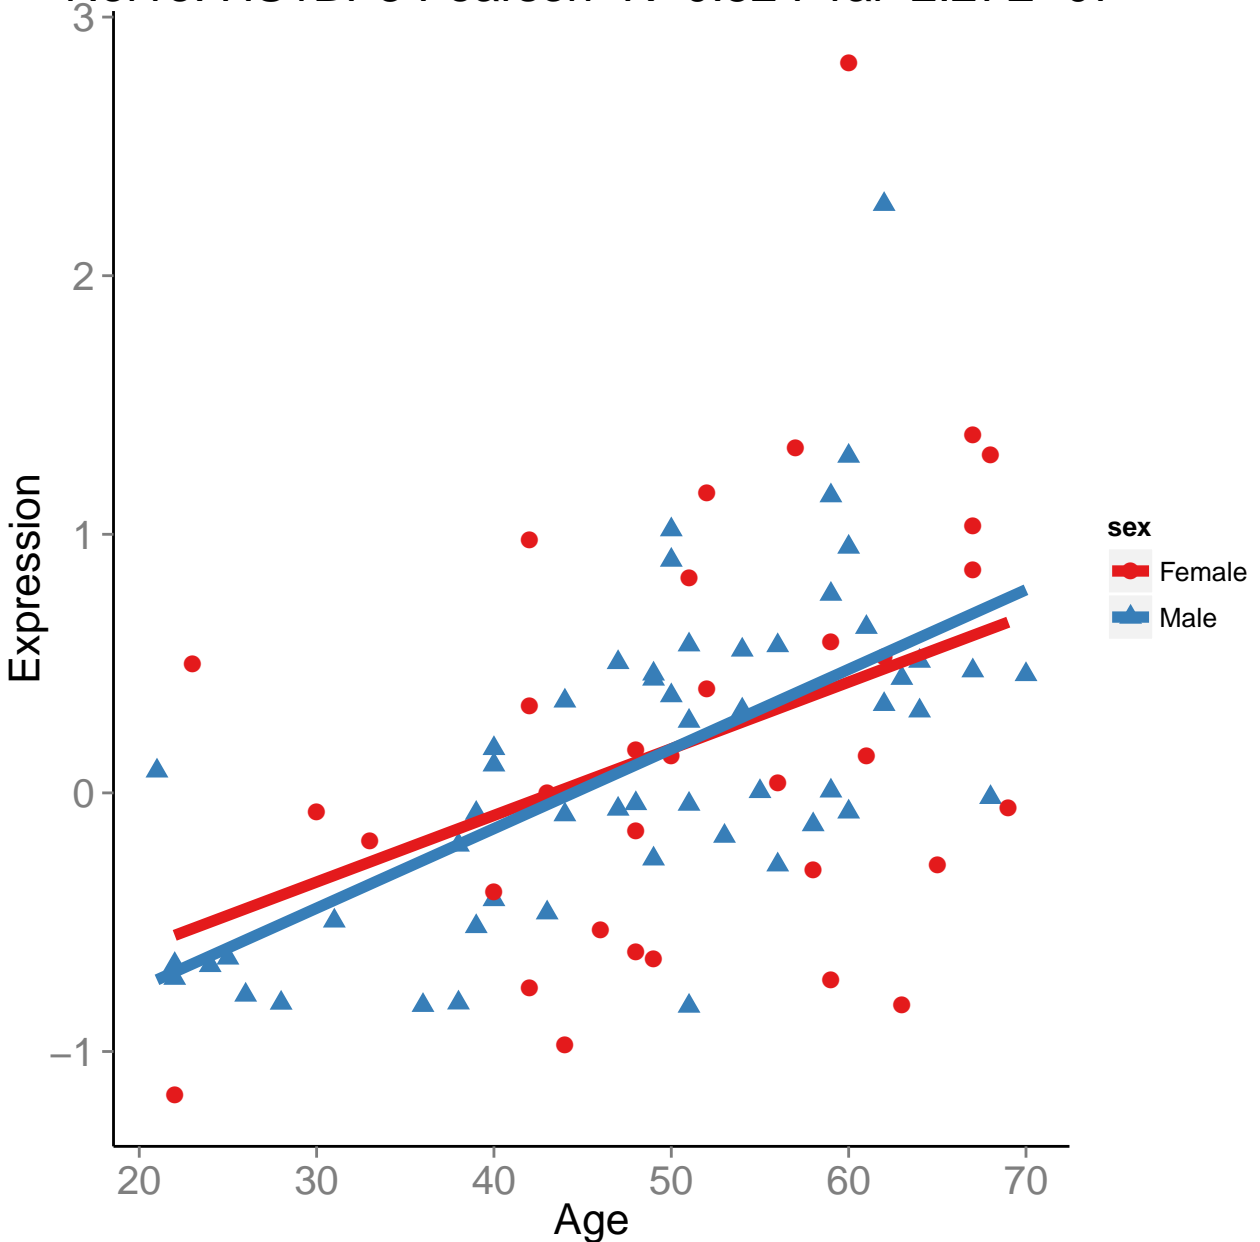



Nerve: FBXO2 Pearson-R=0.52 Pval=2.28E-07

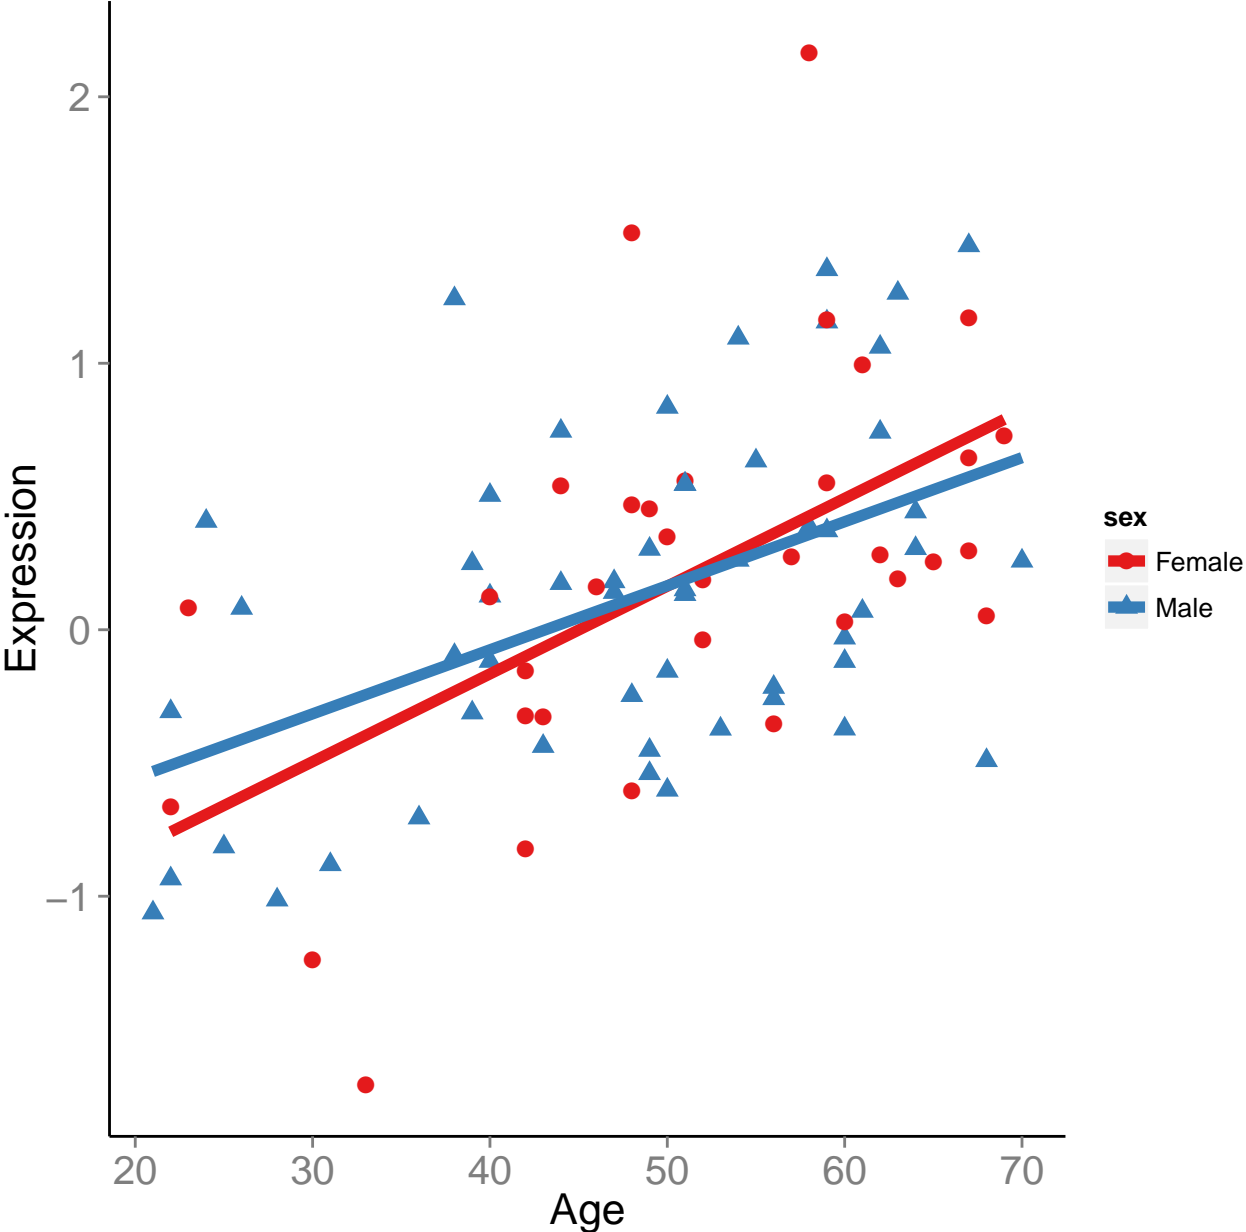

Nerve: DRP2 Pearson-R=-0.52 Pval=2.13E-07

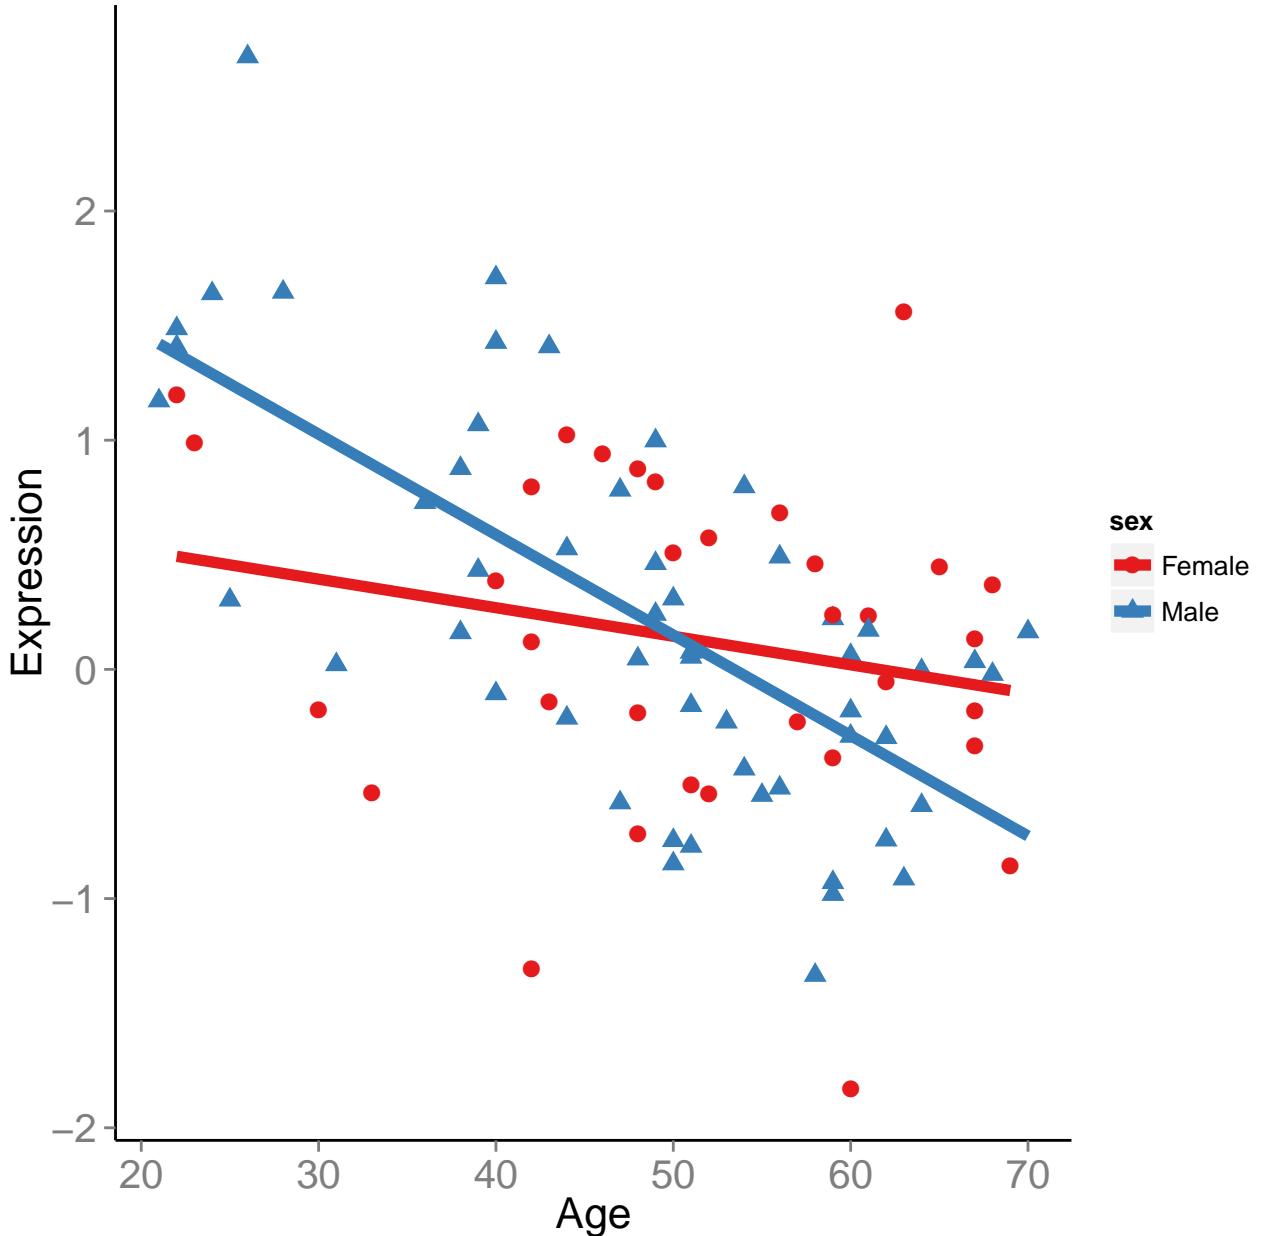

Nerve: STAG3 Pearson-R=-0.52 Pval=2.19E-07

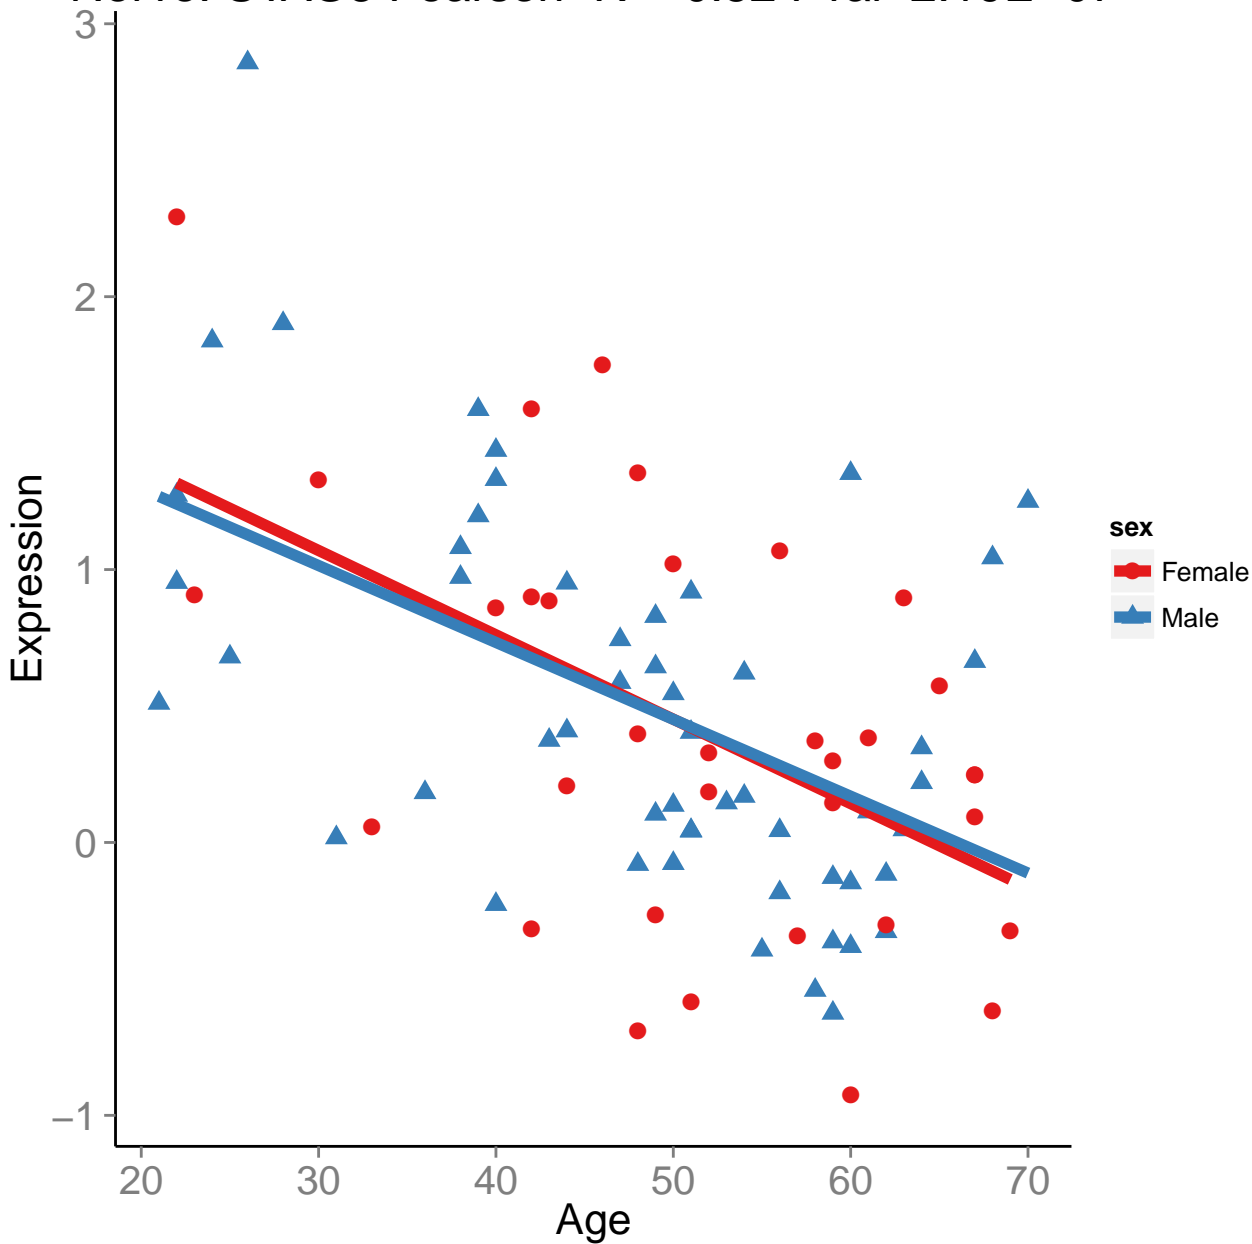

Nerve: ITFG3 Pearson-R=-0.52 Pval=1.91E-07

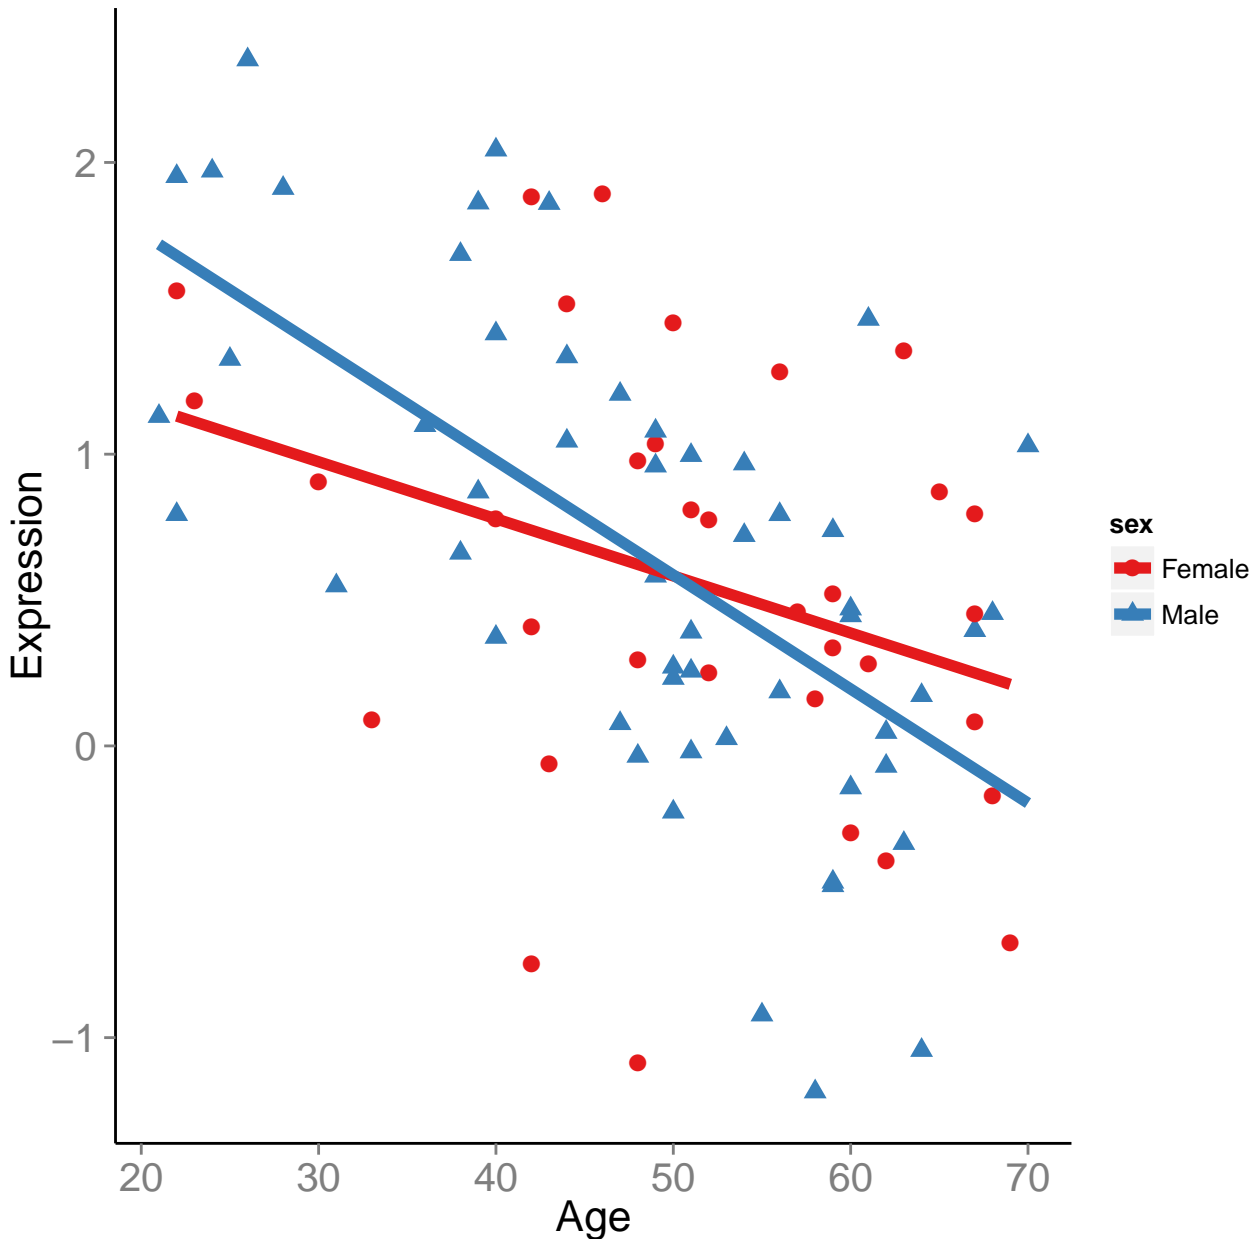

Nerve: RIMS3 Pearson-R=-0.52 Pval=2.60E-07

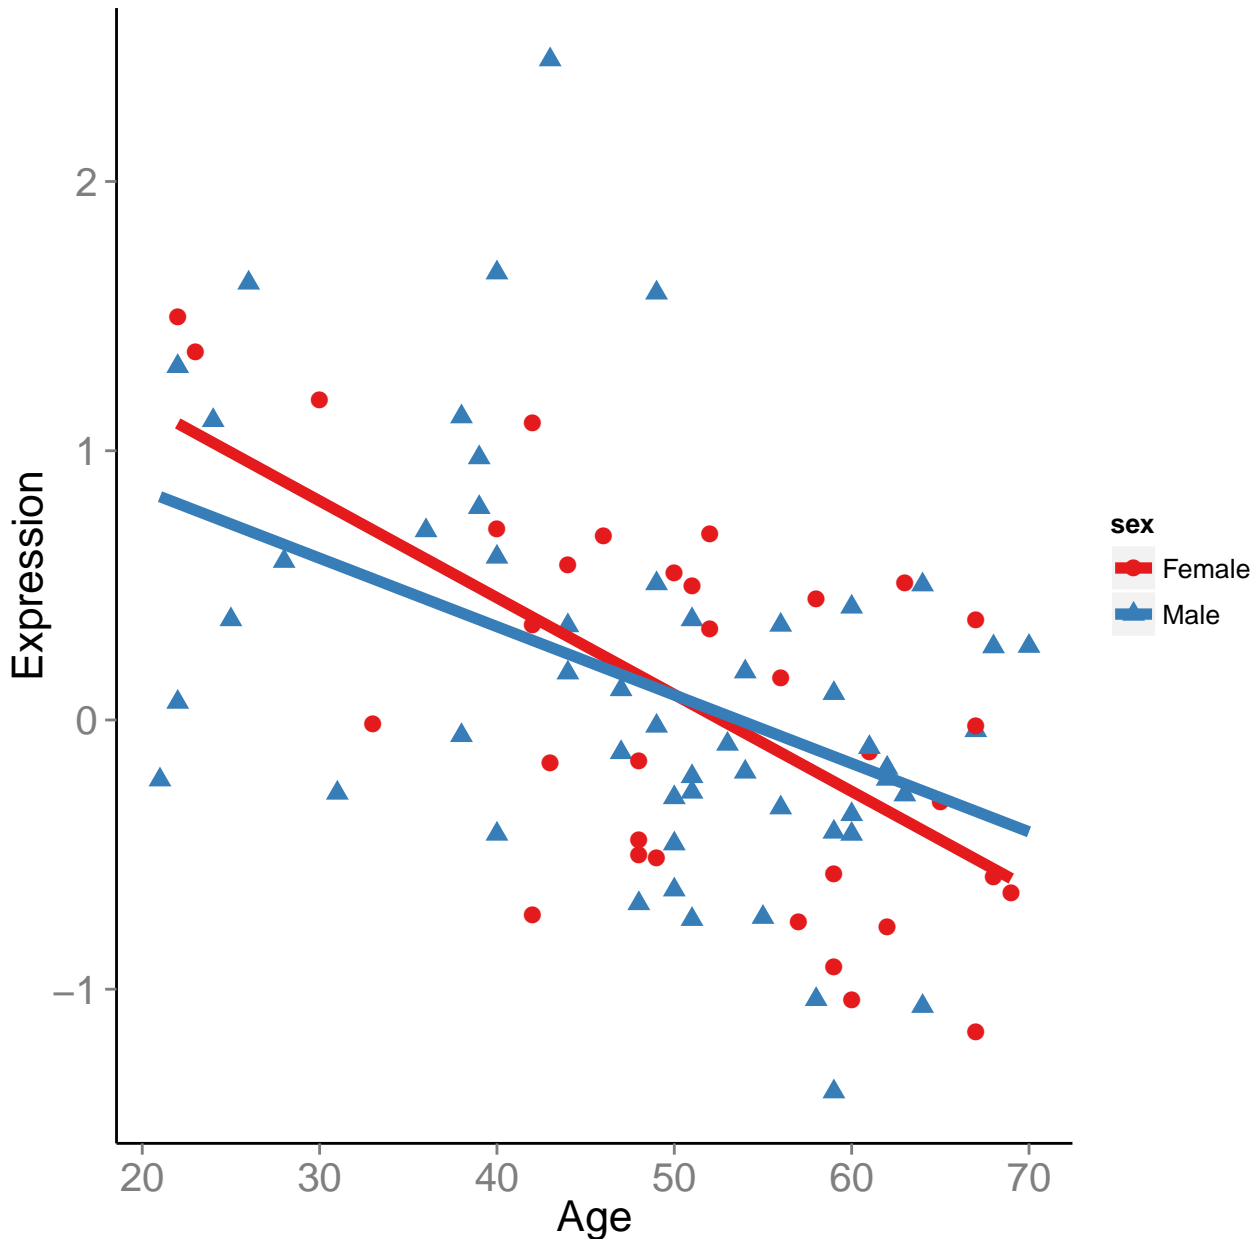

Nerve: SQRDL Pearson-R=-0.51 Pval=3.10E-07

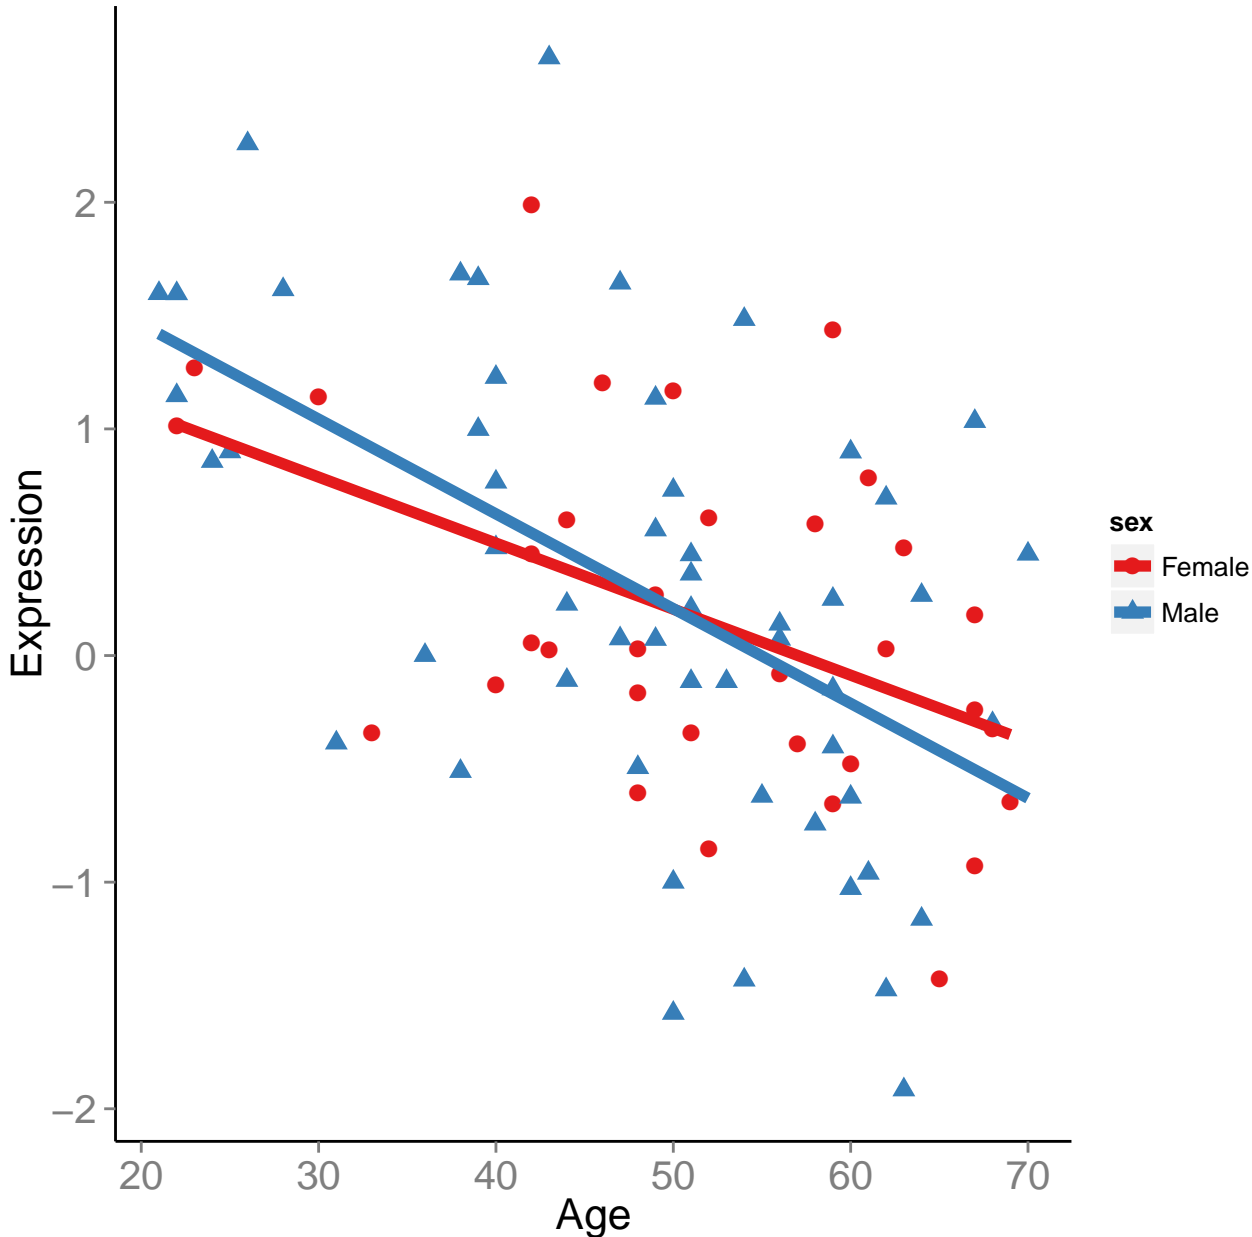

Nerve: ITGB5 Pearson-R=-0.51 Pval=3.59E-07

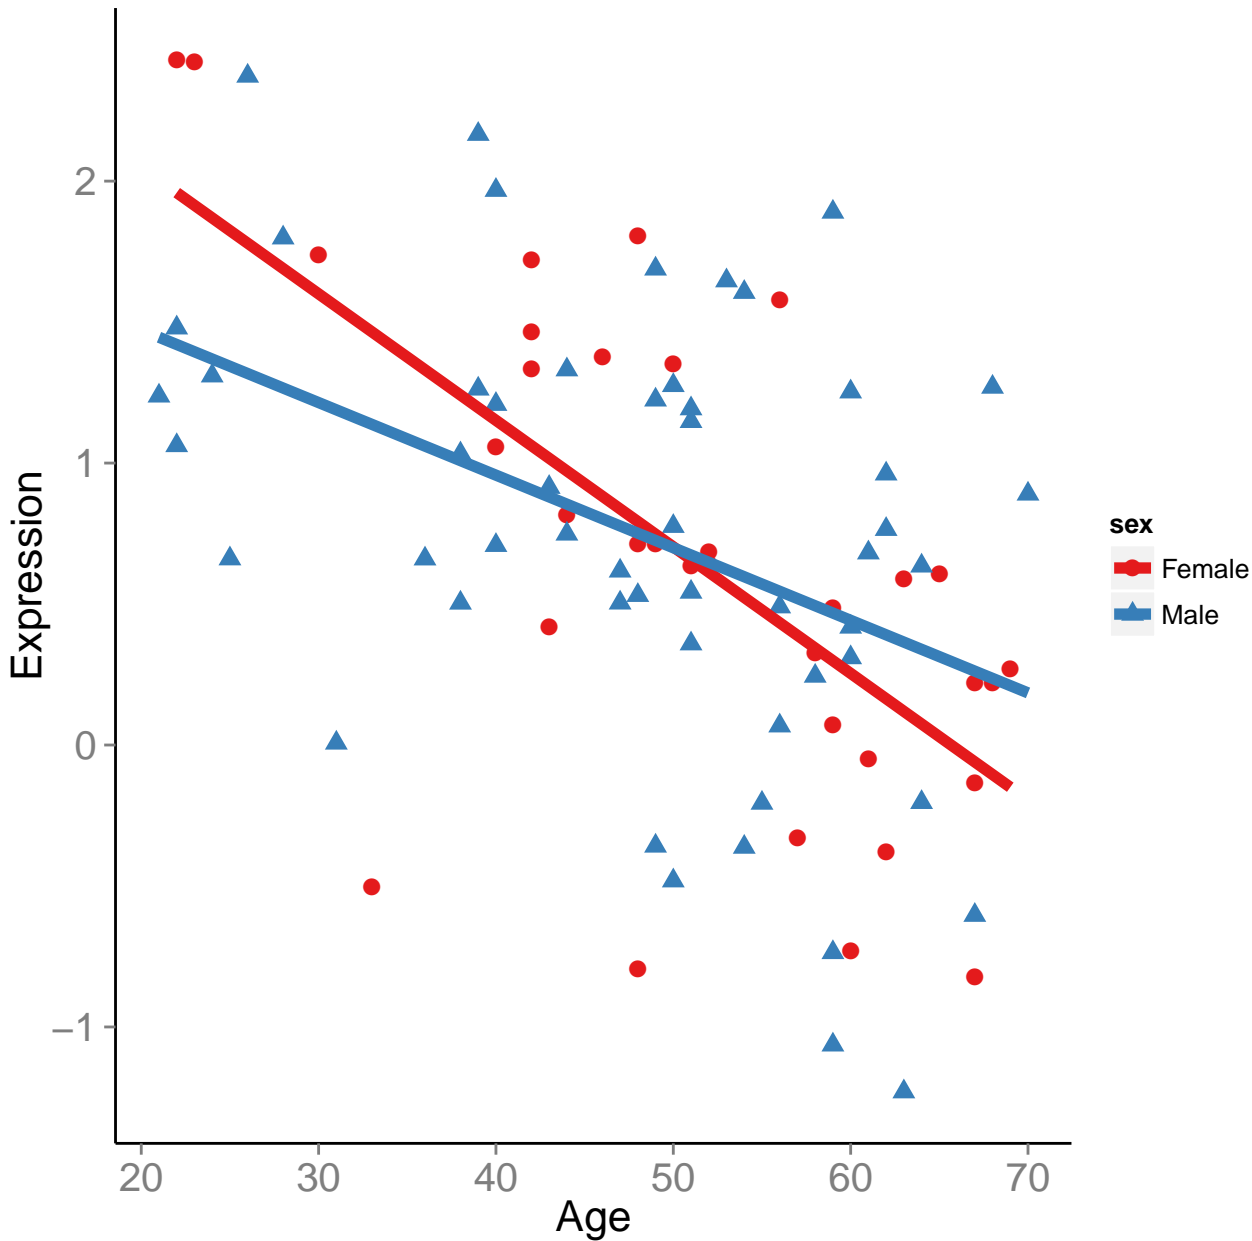

Nerve: SOX2 Pearson-R=0.51 Pval=4.00E-07

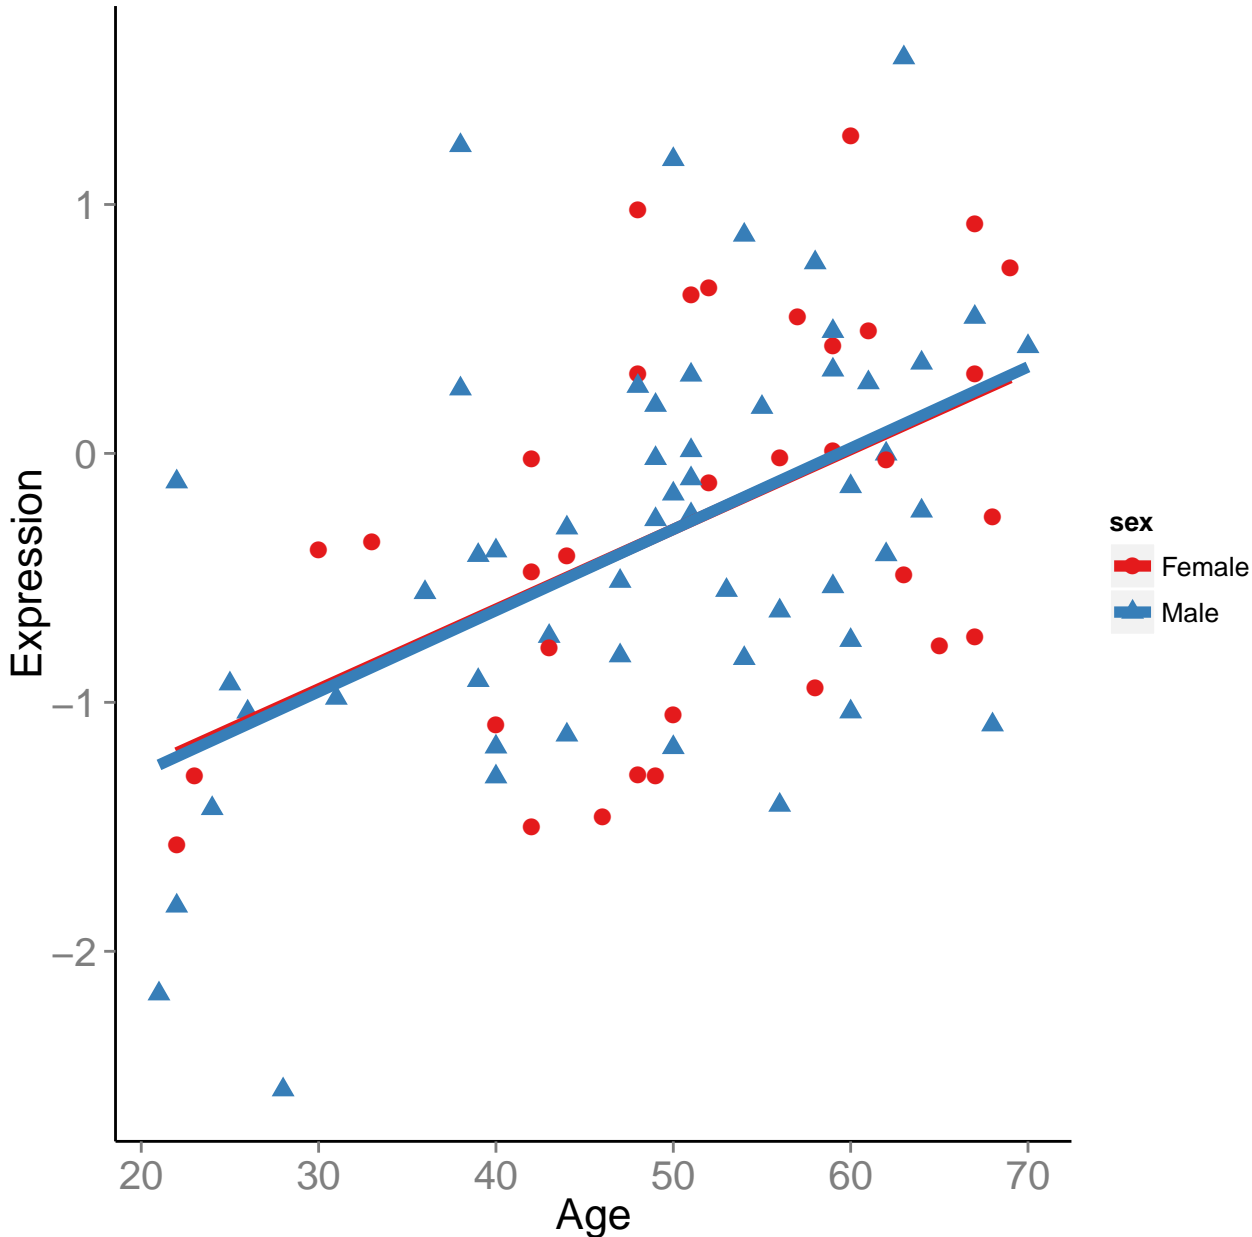



Nerve: BIN1 Pearson-R=0.51 Pval=4.18E-07

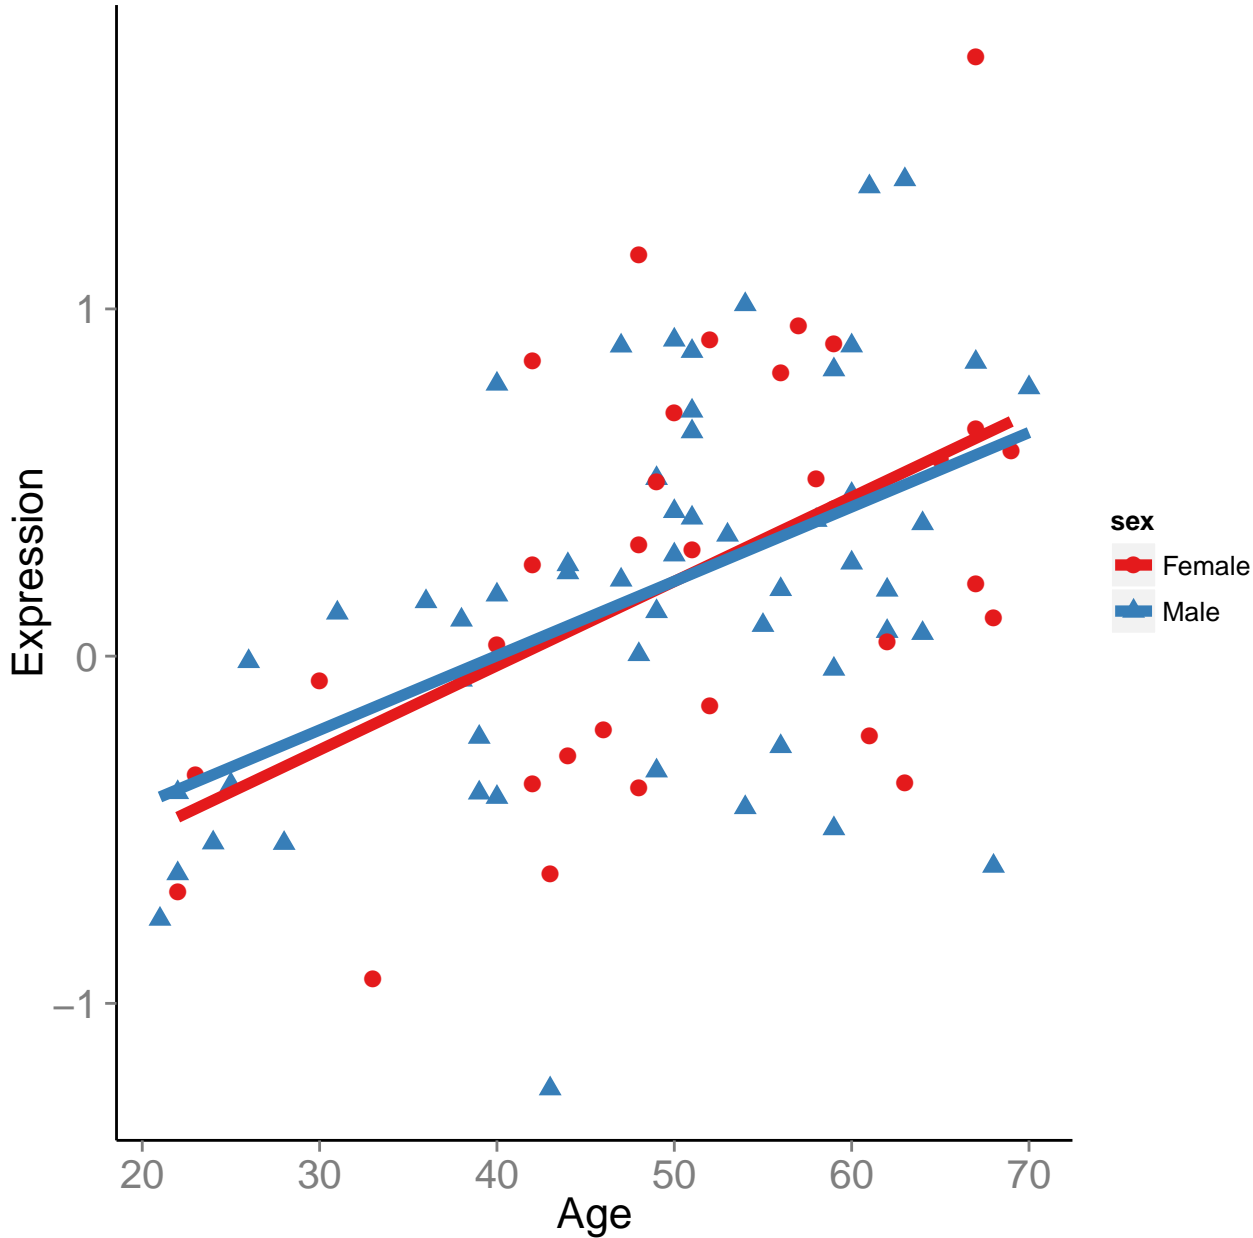

Nerve: GDF10 Pearson-R=0.51 Pval=4.24E-07

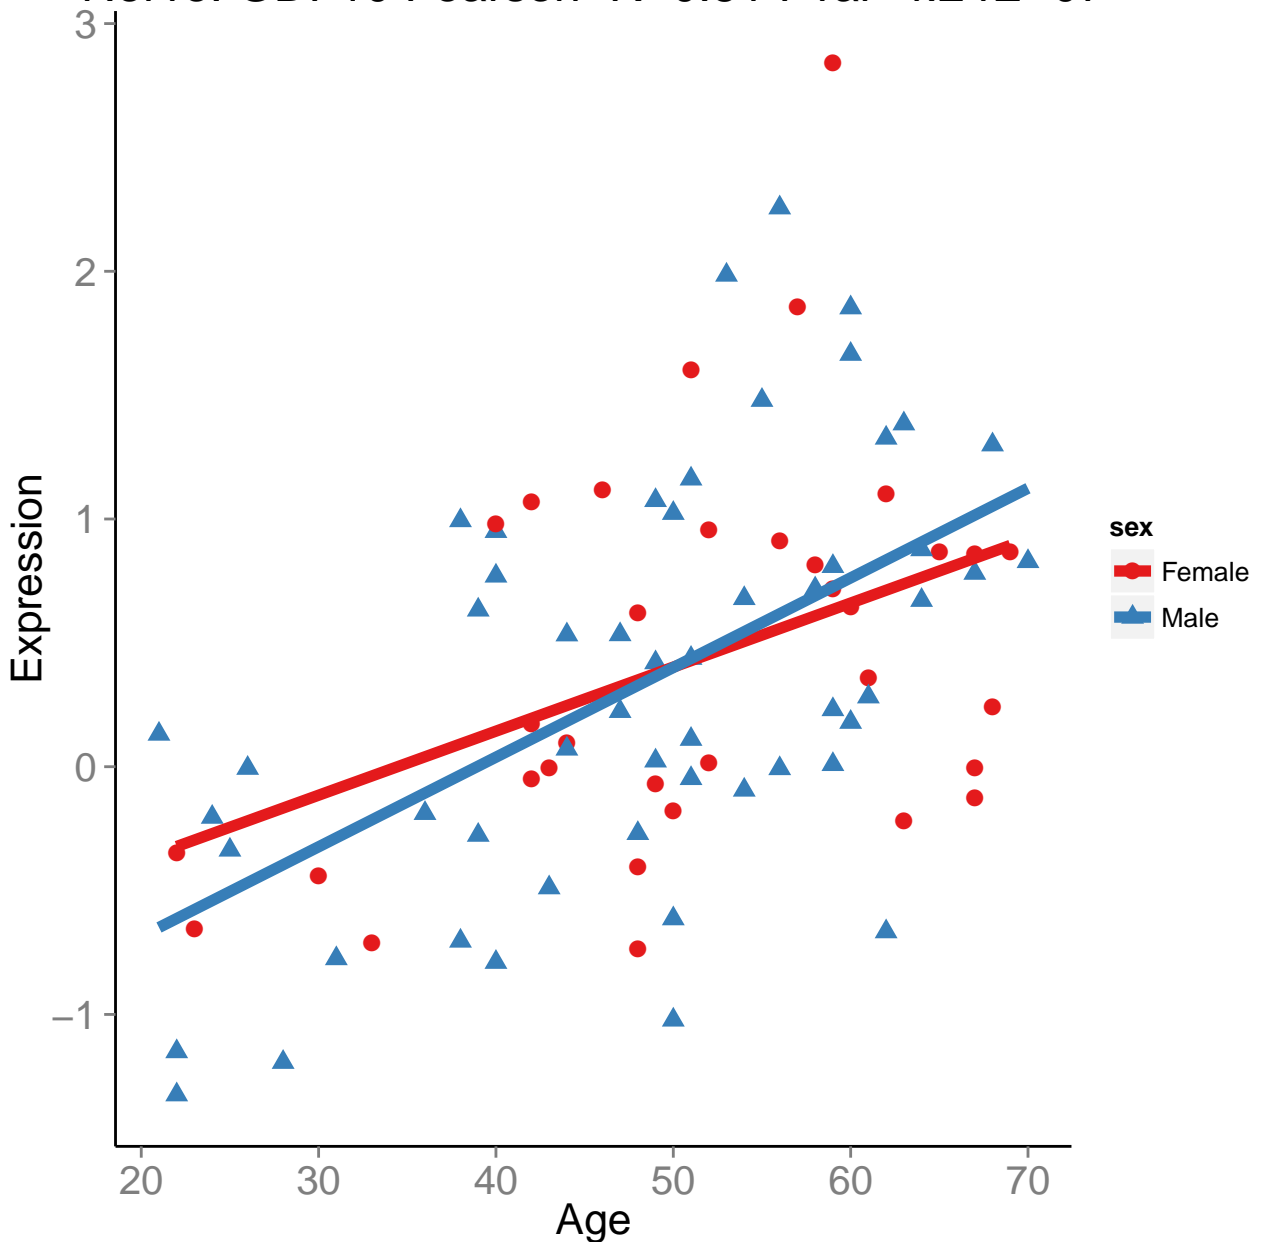

Nerve: SCN1B Pearson-R=0.51 Pval=5.22E-07

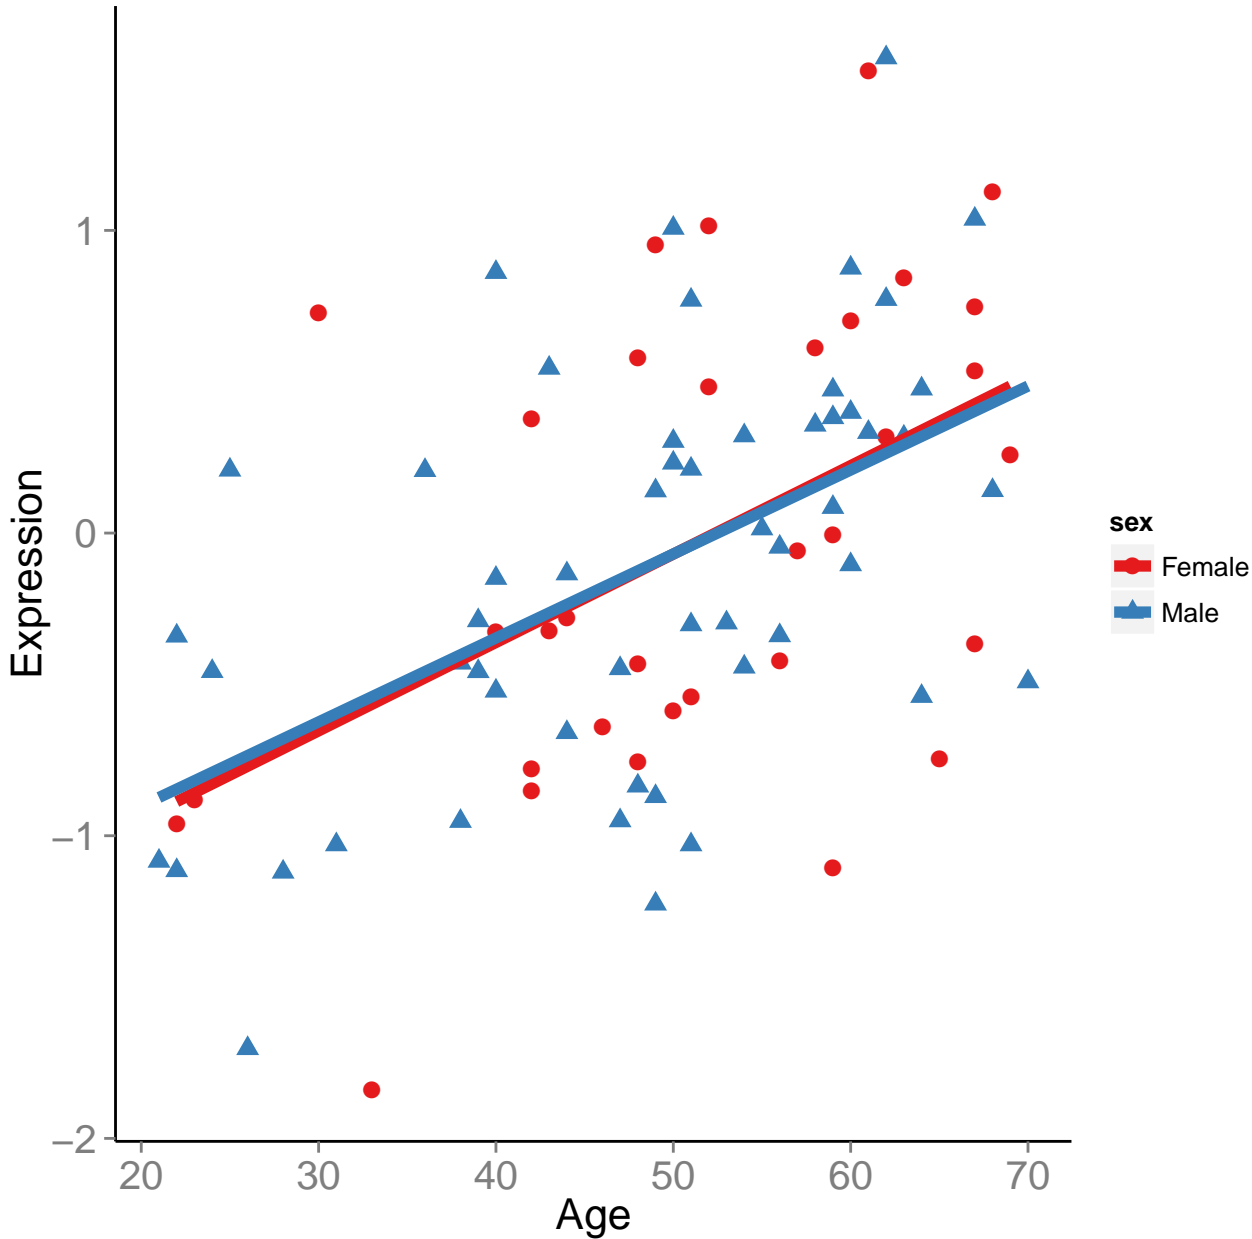

Nerve: SLC22A17 Pearson-R=0.51 Pval=5.14E-07

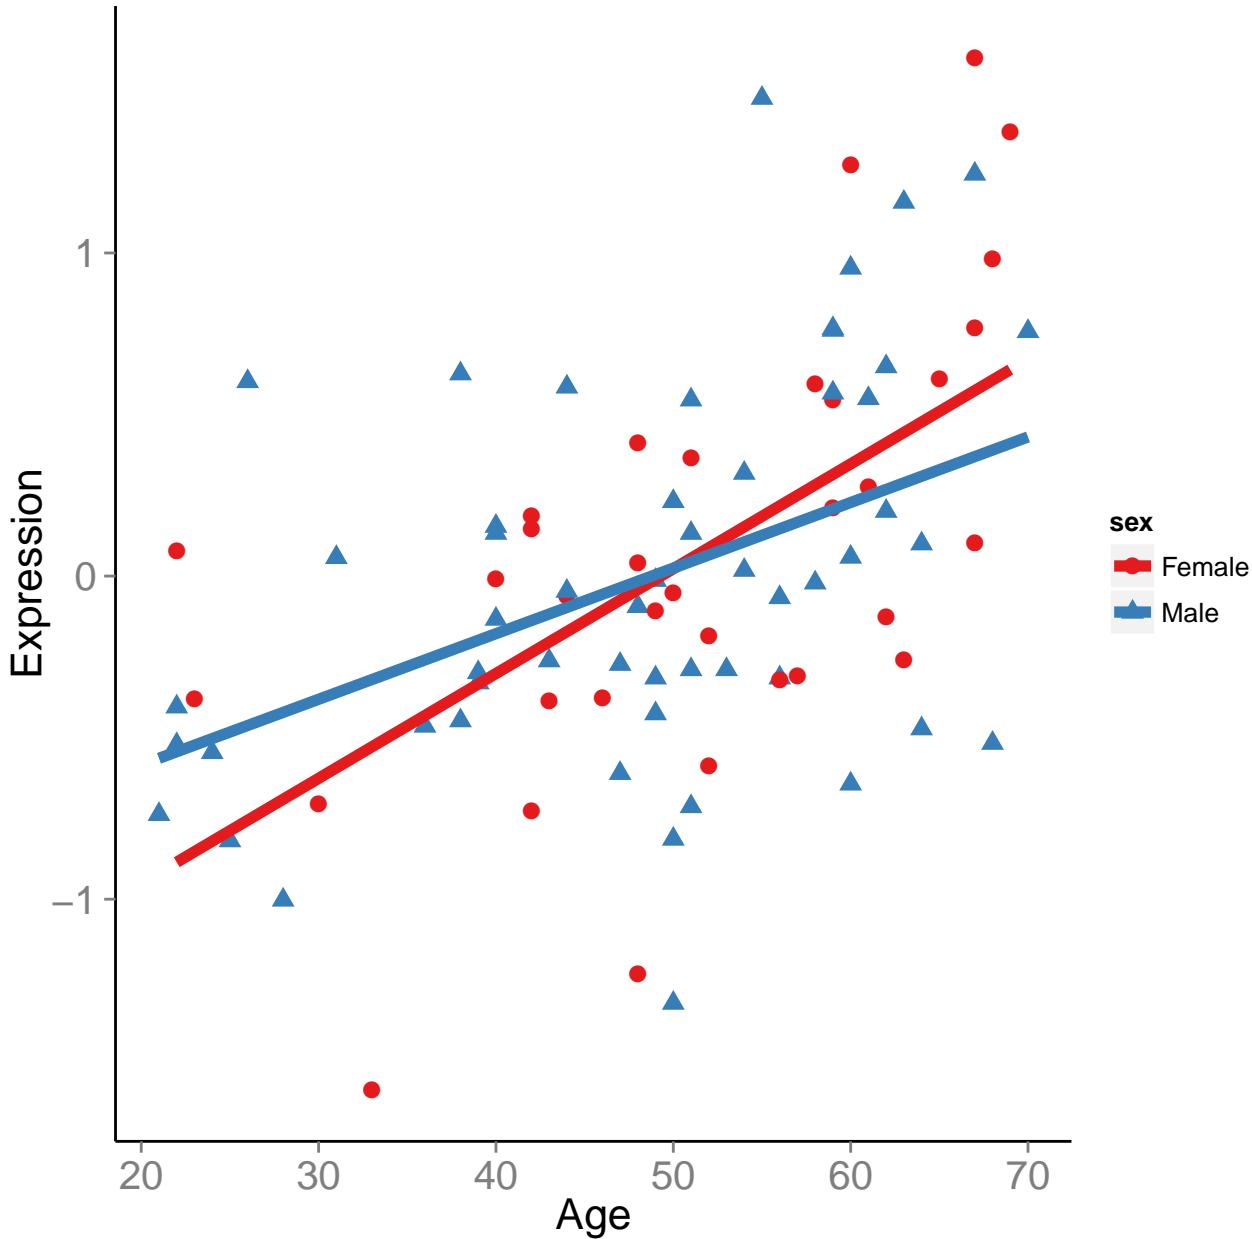

Nerve: JUN Pearson-R=0.50 Pval=5.43E-07

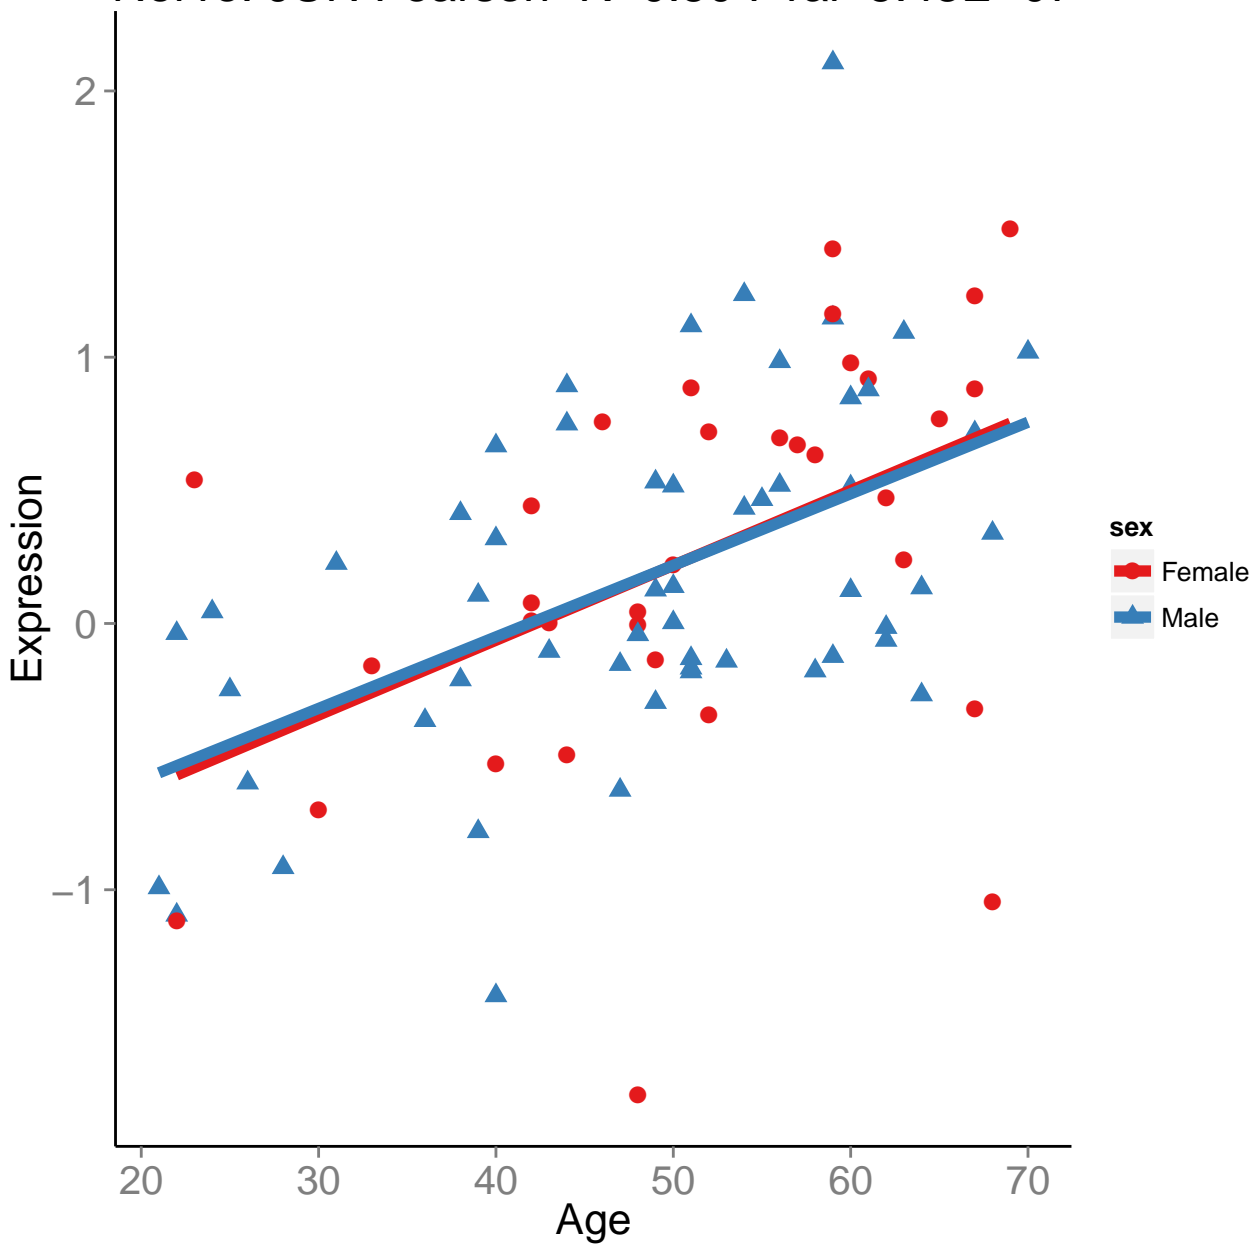

Nerve: L1CAM Pearson-R=0.50 Pval=5.76E-07

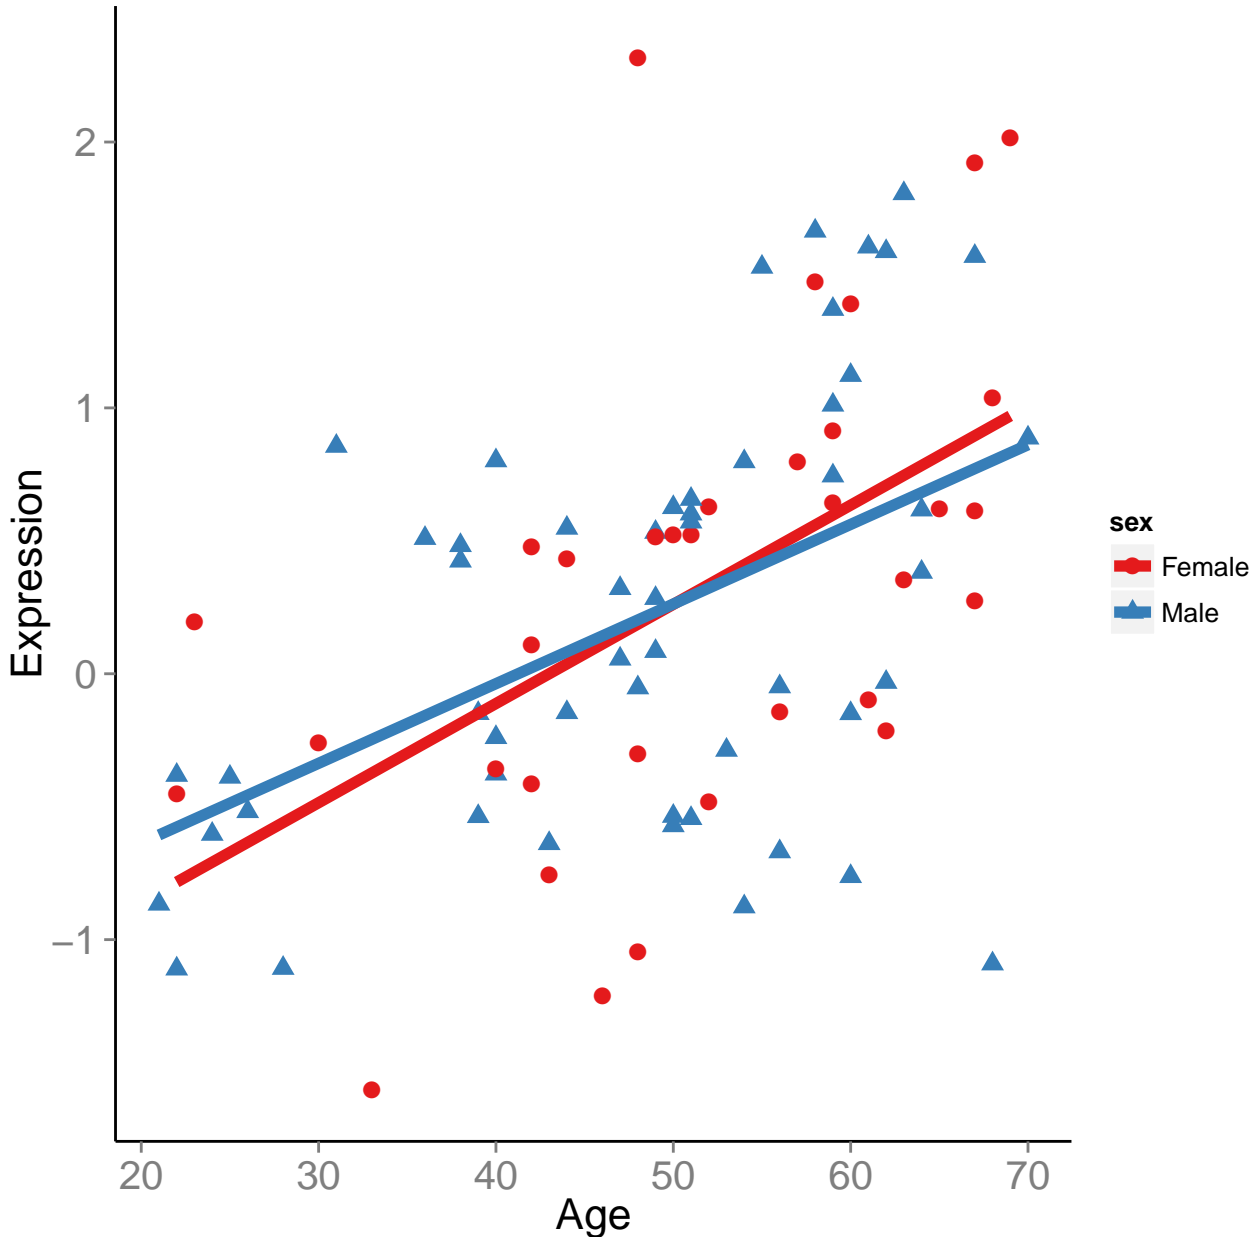

Nerve: TTYH1 Pearson-R=0.50 Pval=7.61E-07

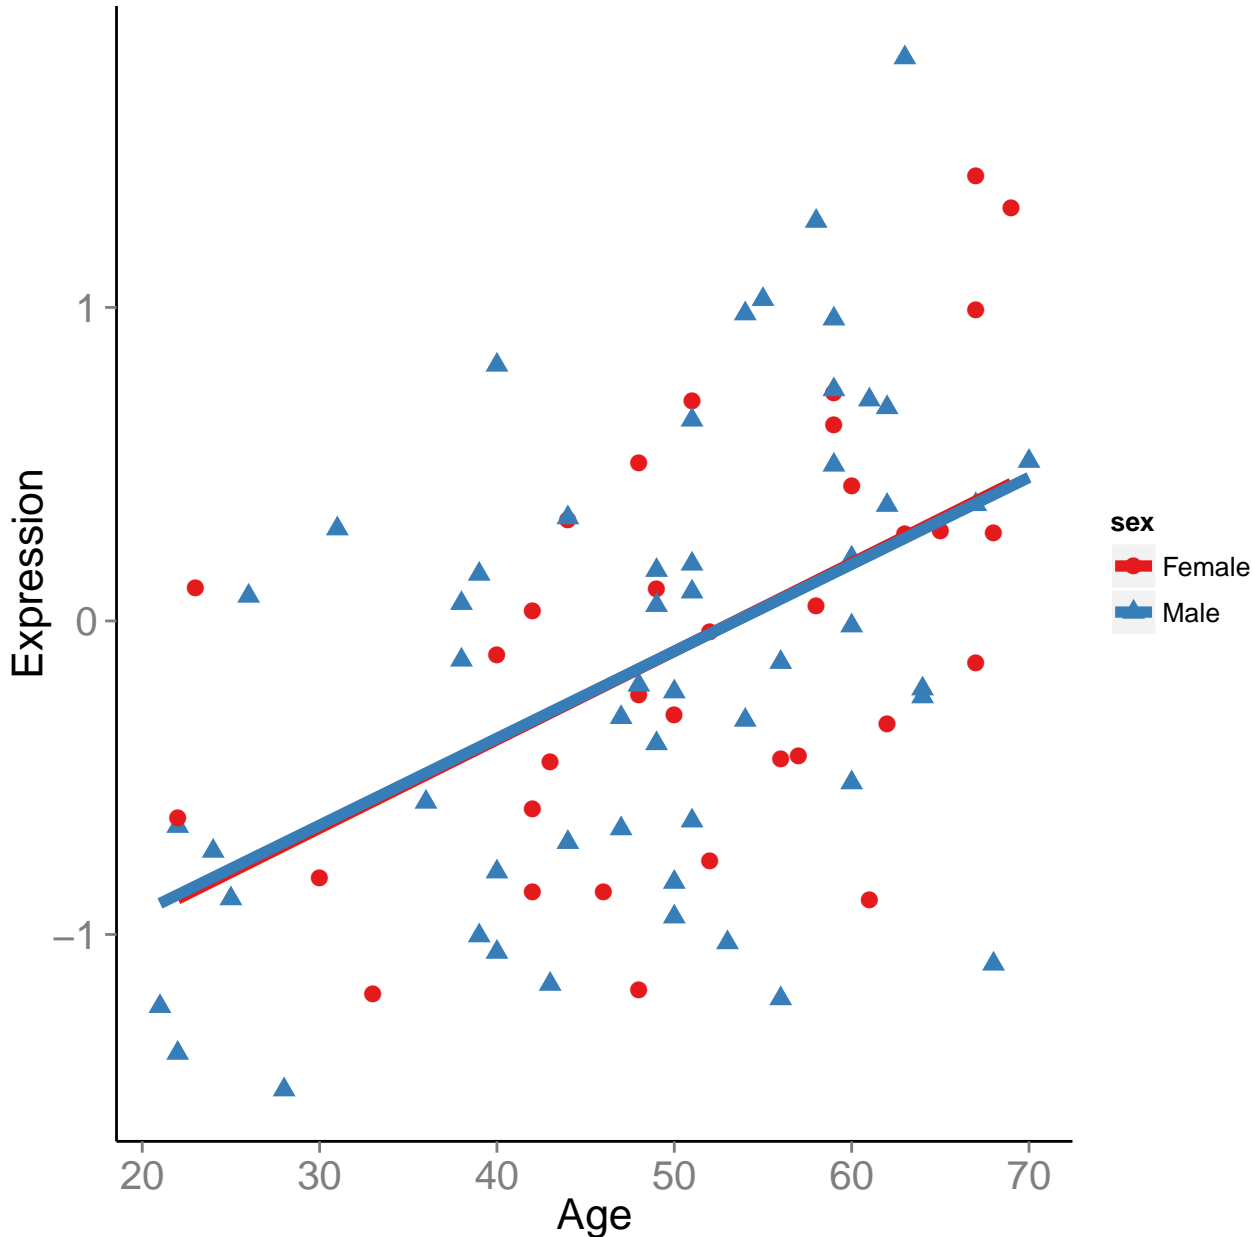

Nerve: FRMD1 Pearson-R=-0.50 Pval=6.94E-07

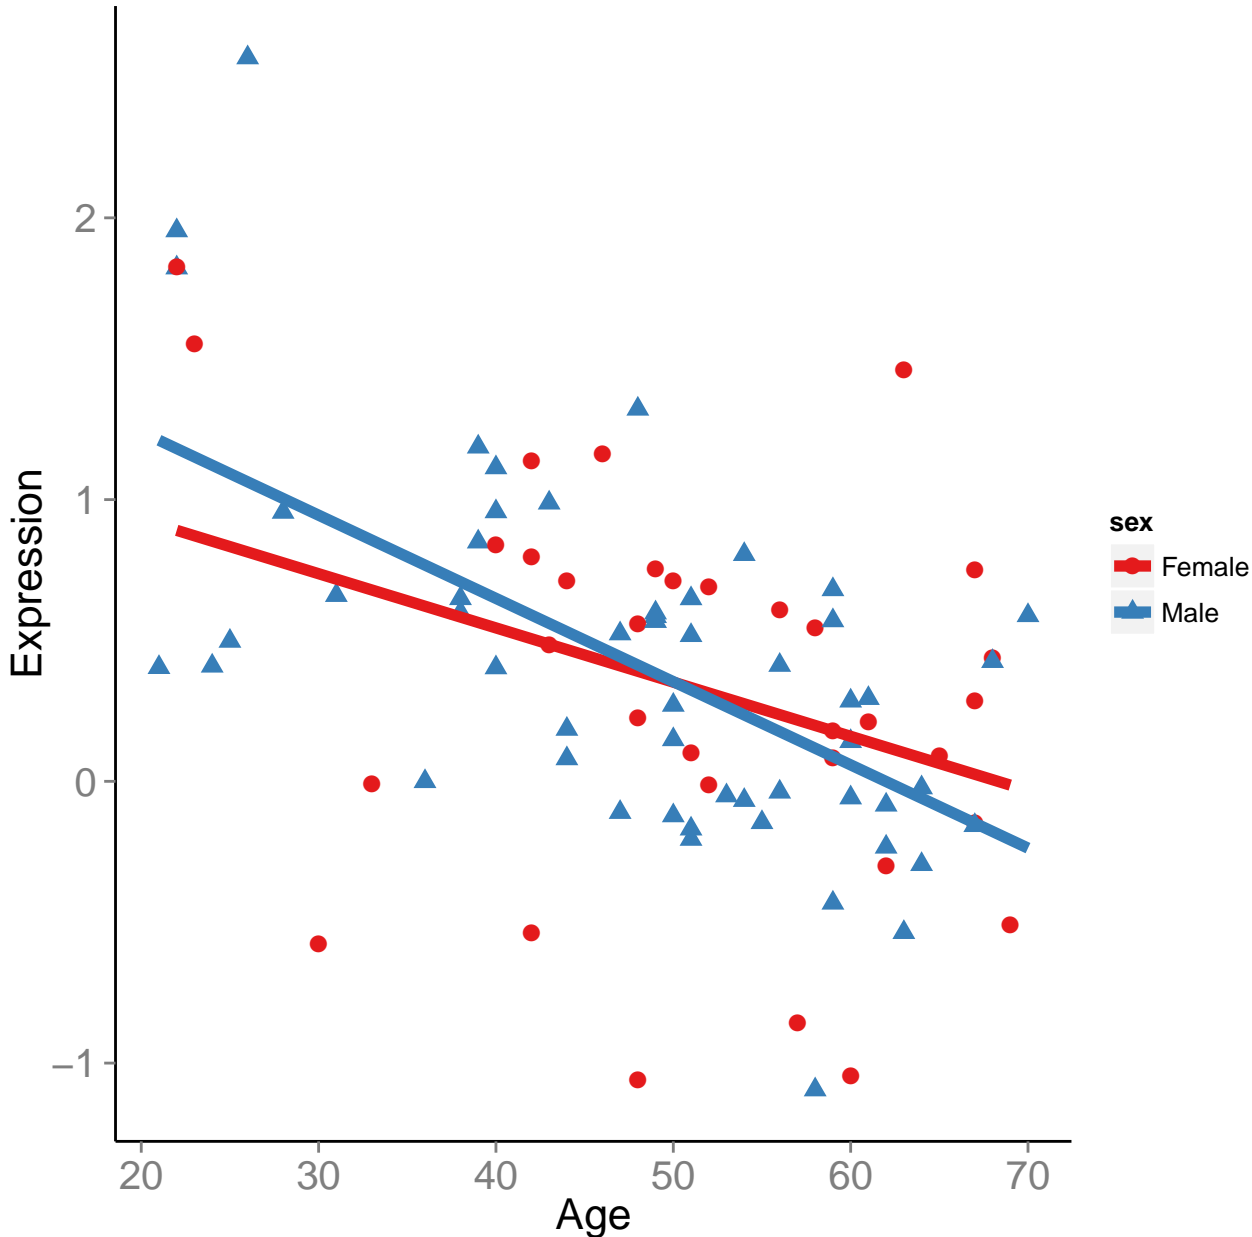



Nerve: FAM153B Pearson-R=0.50 Pval=7.68E-07

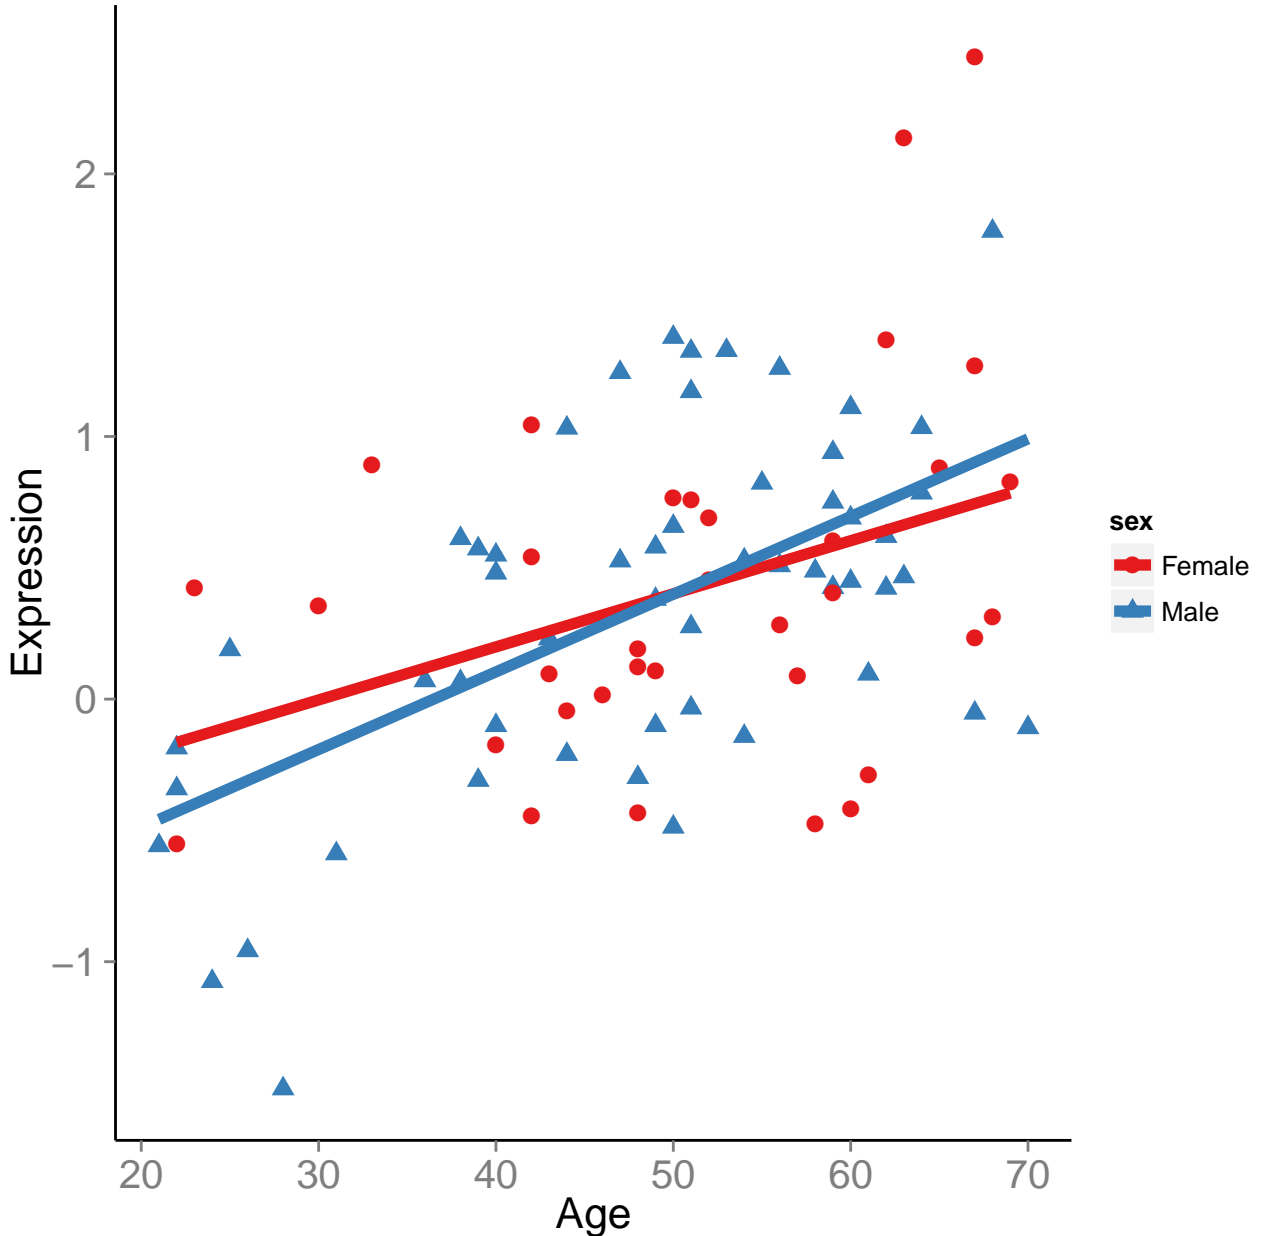

Nerve: KHDRBS3 Pearson-R=0.50 Pval=7.44E-07

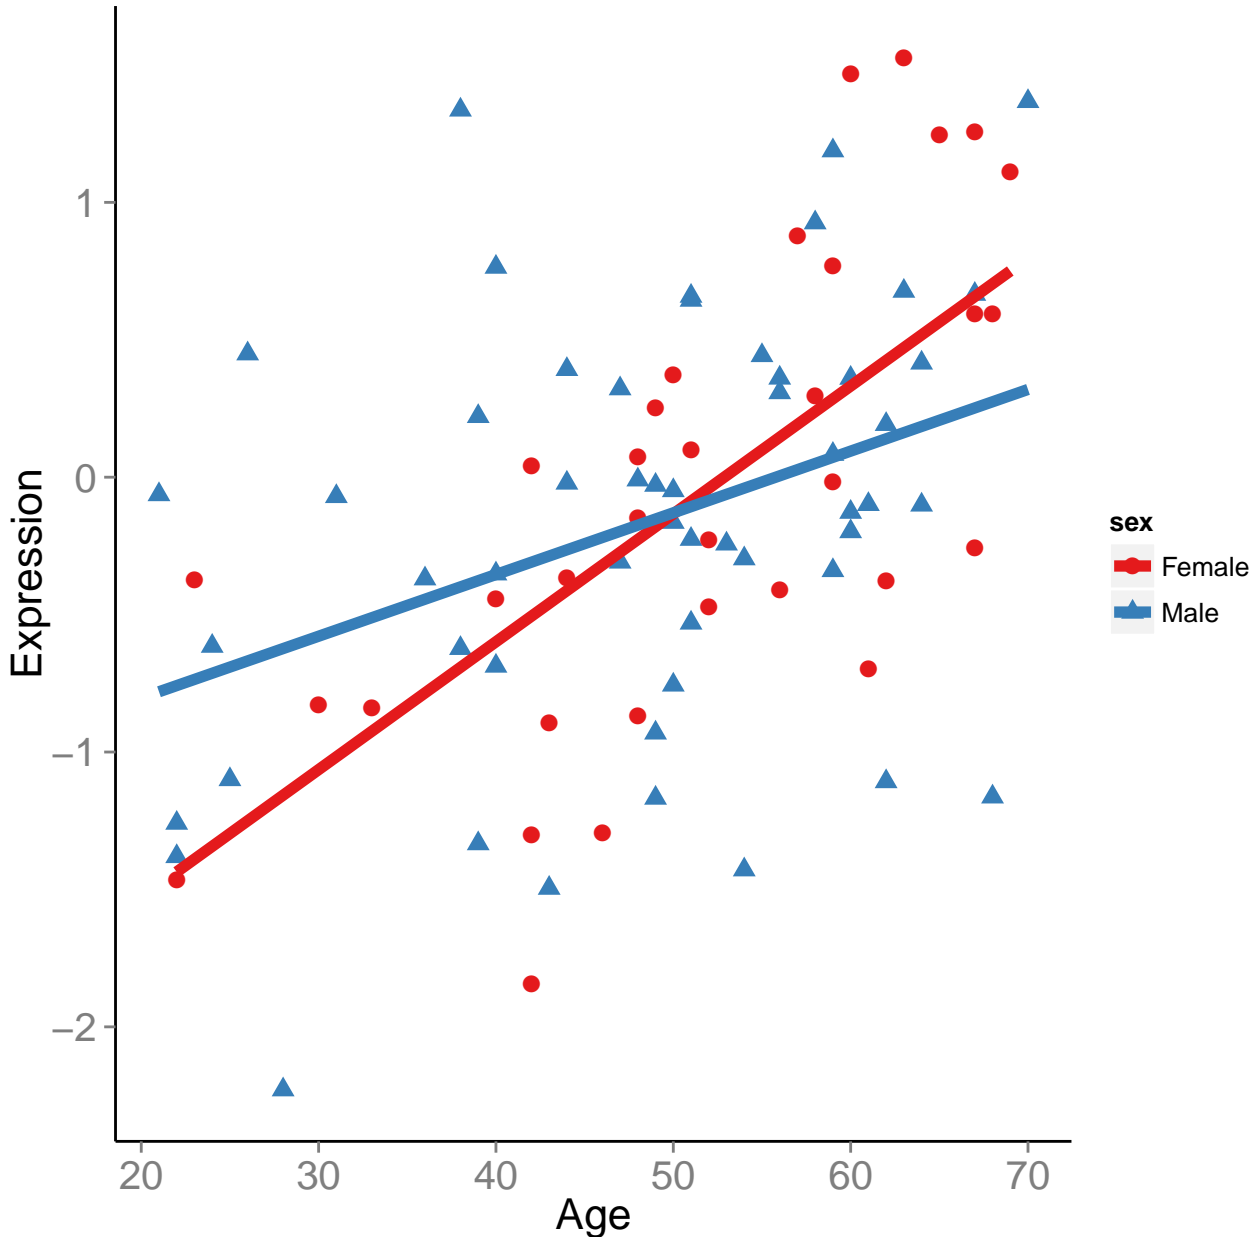

Nerve: GRB14 Pearson-R=-0.50 Pval=7.46E-07

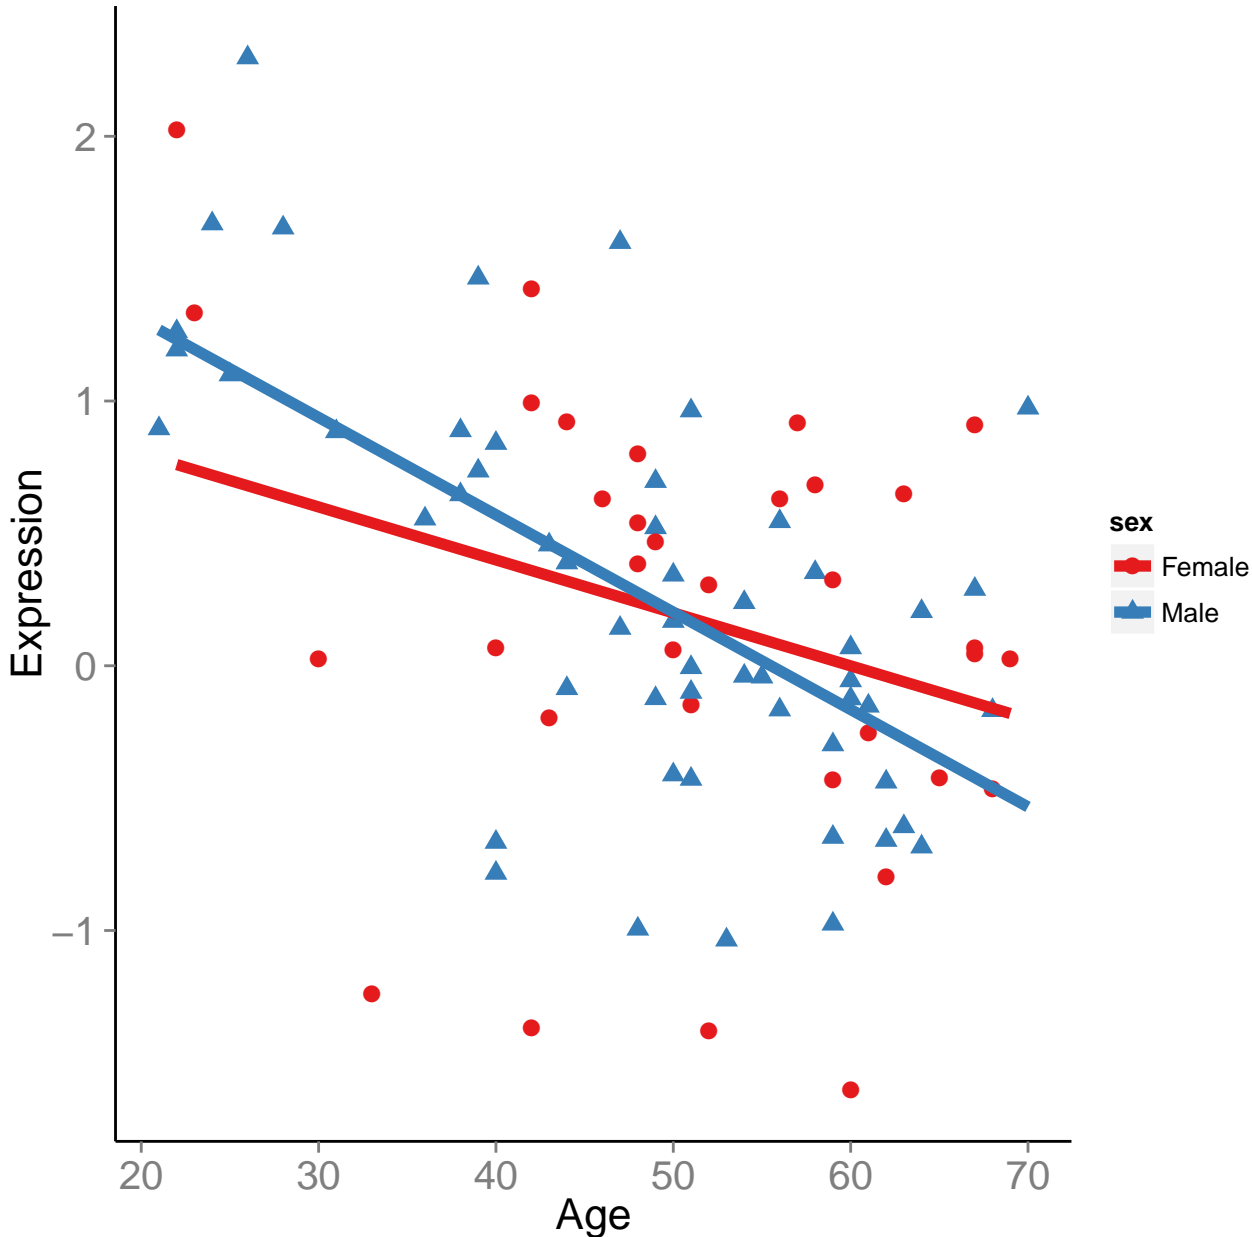

Nerve: CTD-2647L4.5 Pearson-R=-0.50 Pval=7.53E-07

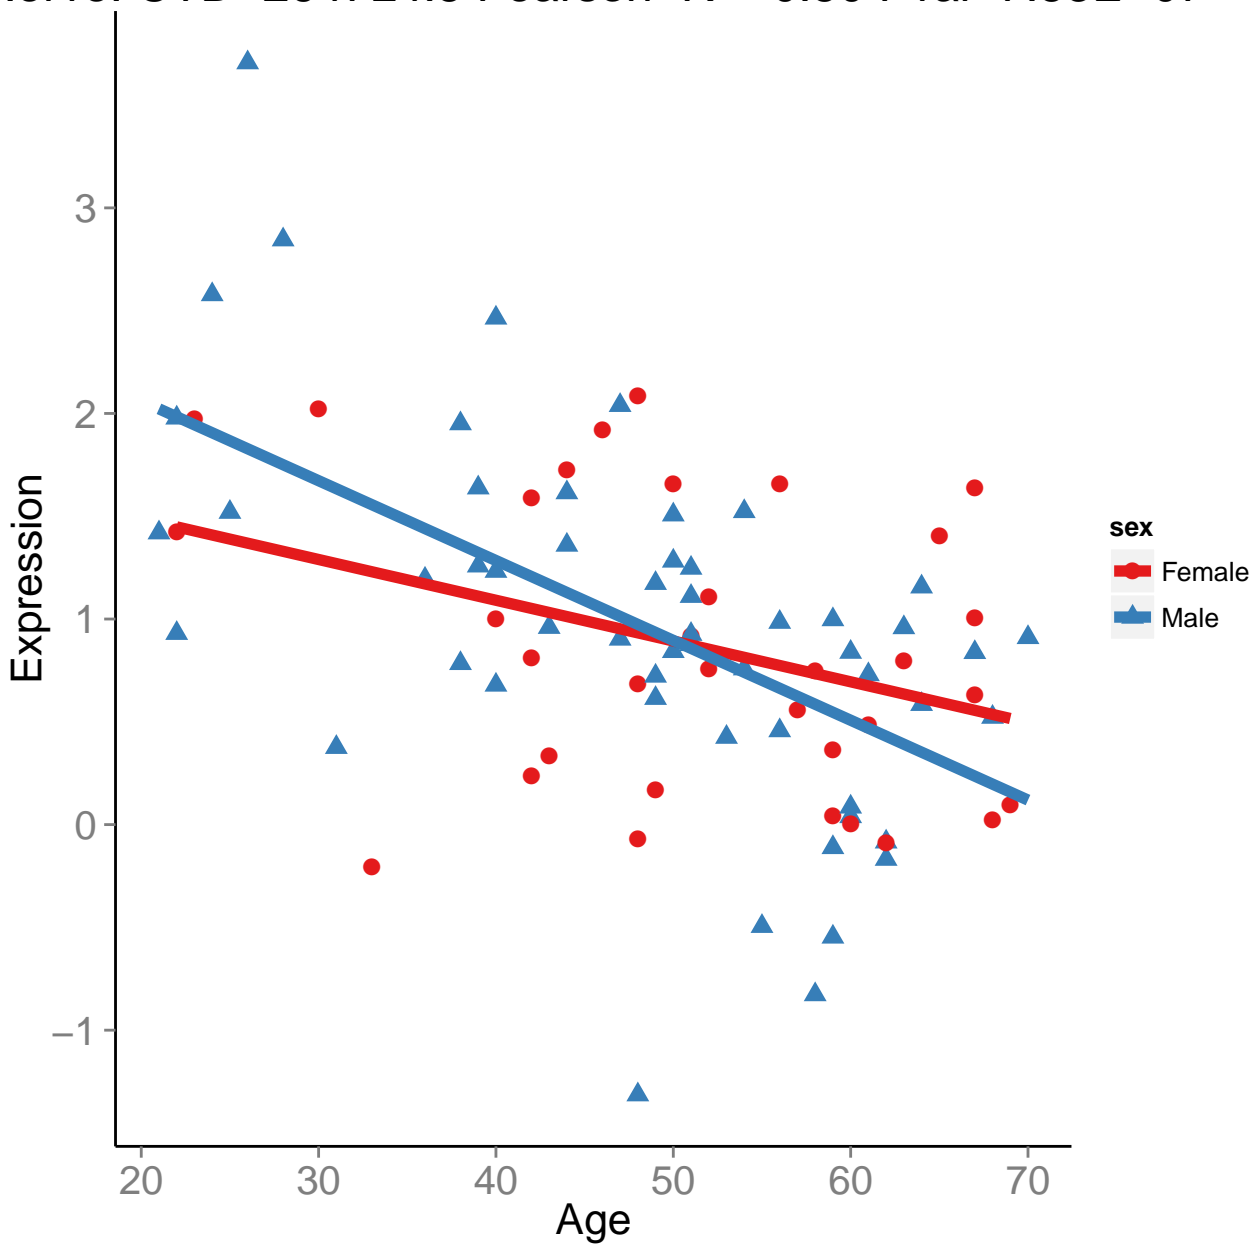

Nerve: RP11-226L15.5 Pearson-R=-0.50 Pval=7.43E-07

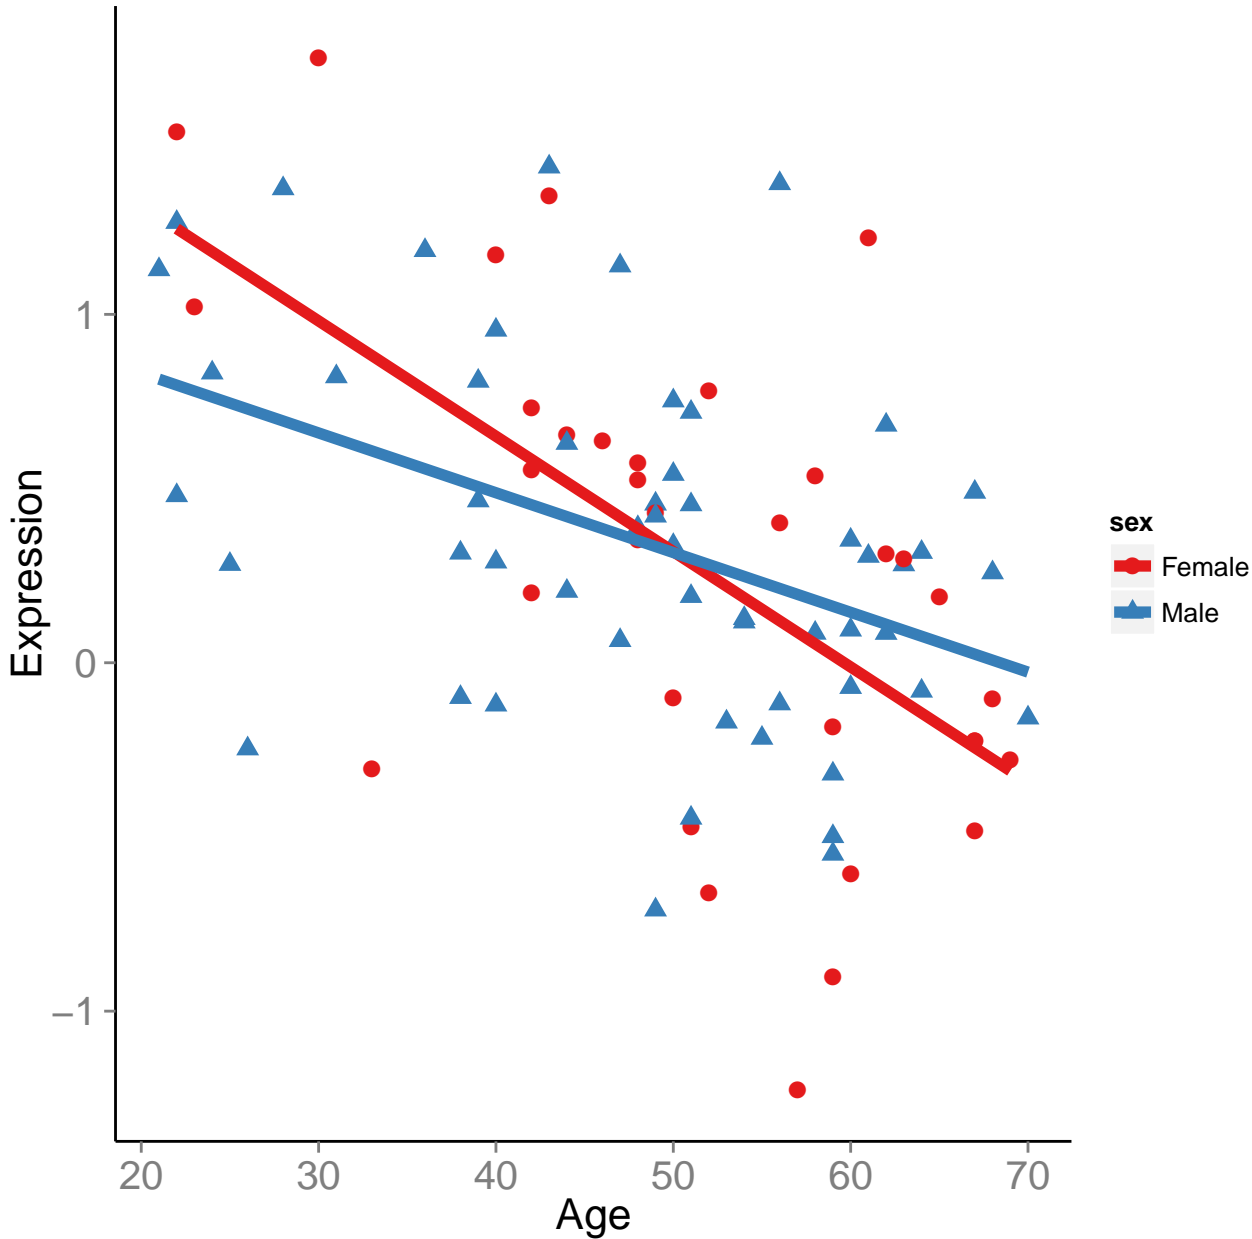

Nerve: CORO2B Pearson-R=0.49 Pval=9.56E-07

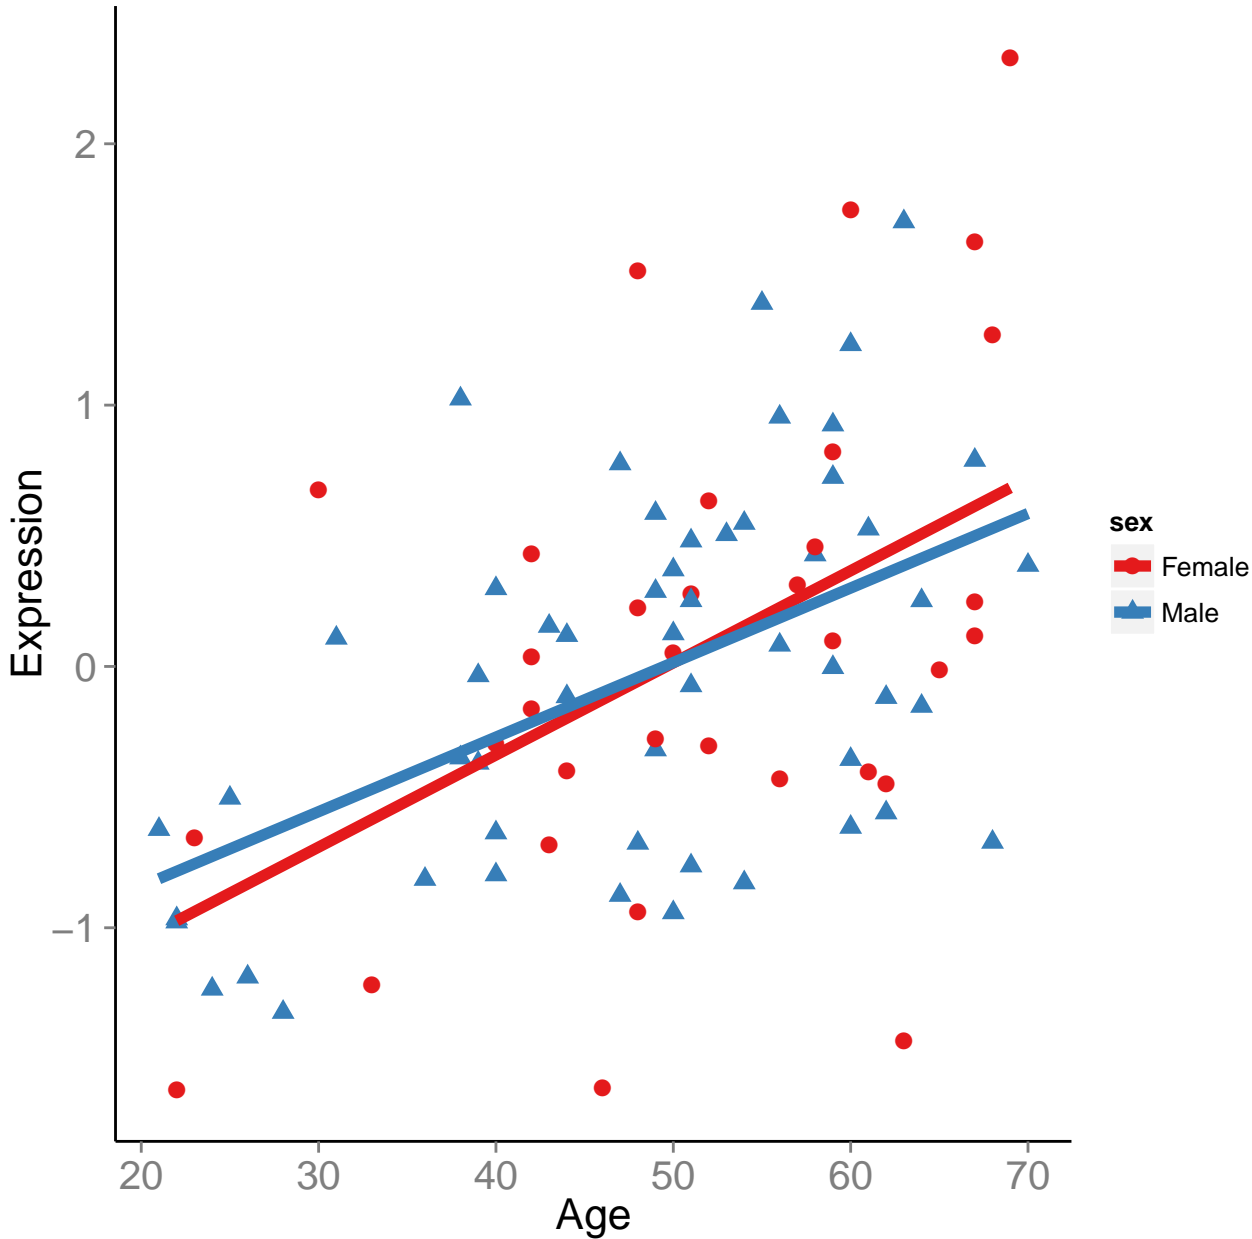

Nerve: LRRCC1 Pearson-R=0.49 Pval=9.54E-07

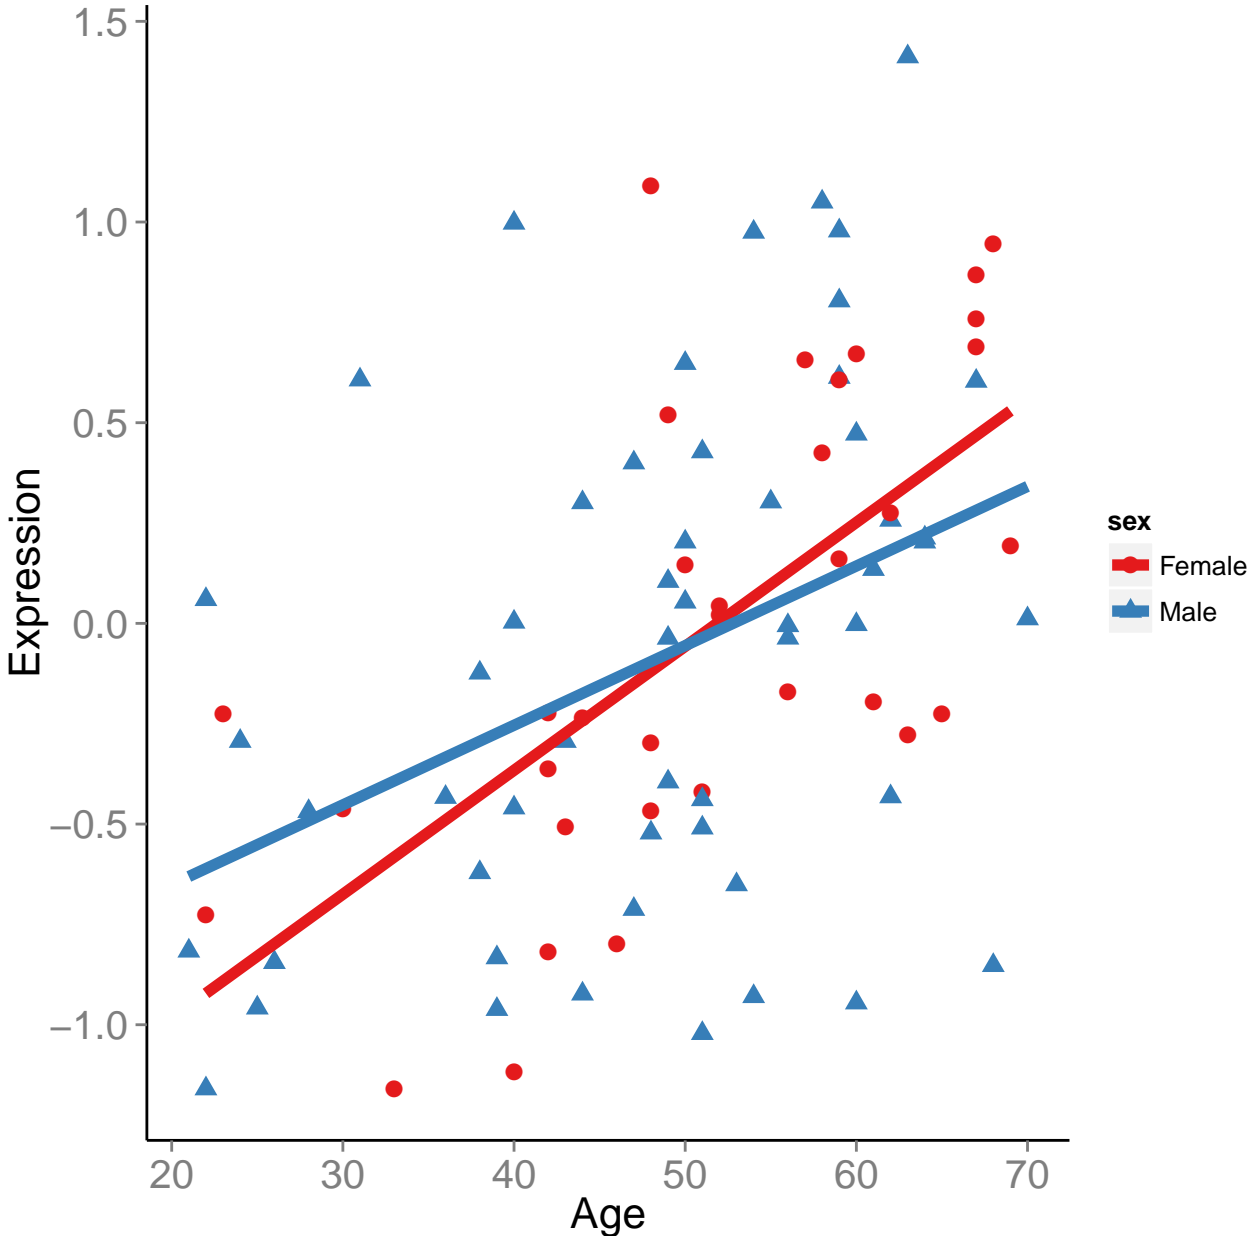

Nerve: BBS7 Pearson-R=0.49 Pval=1.02E-06

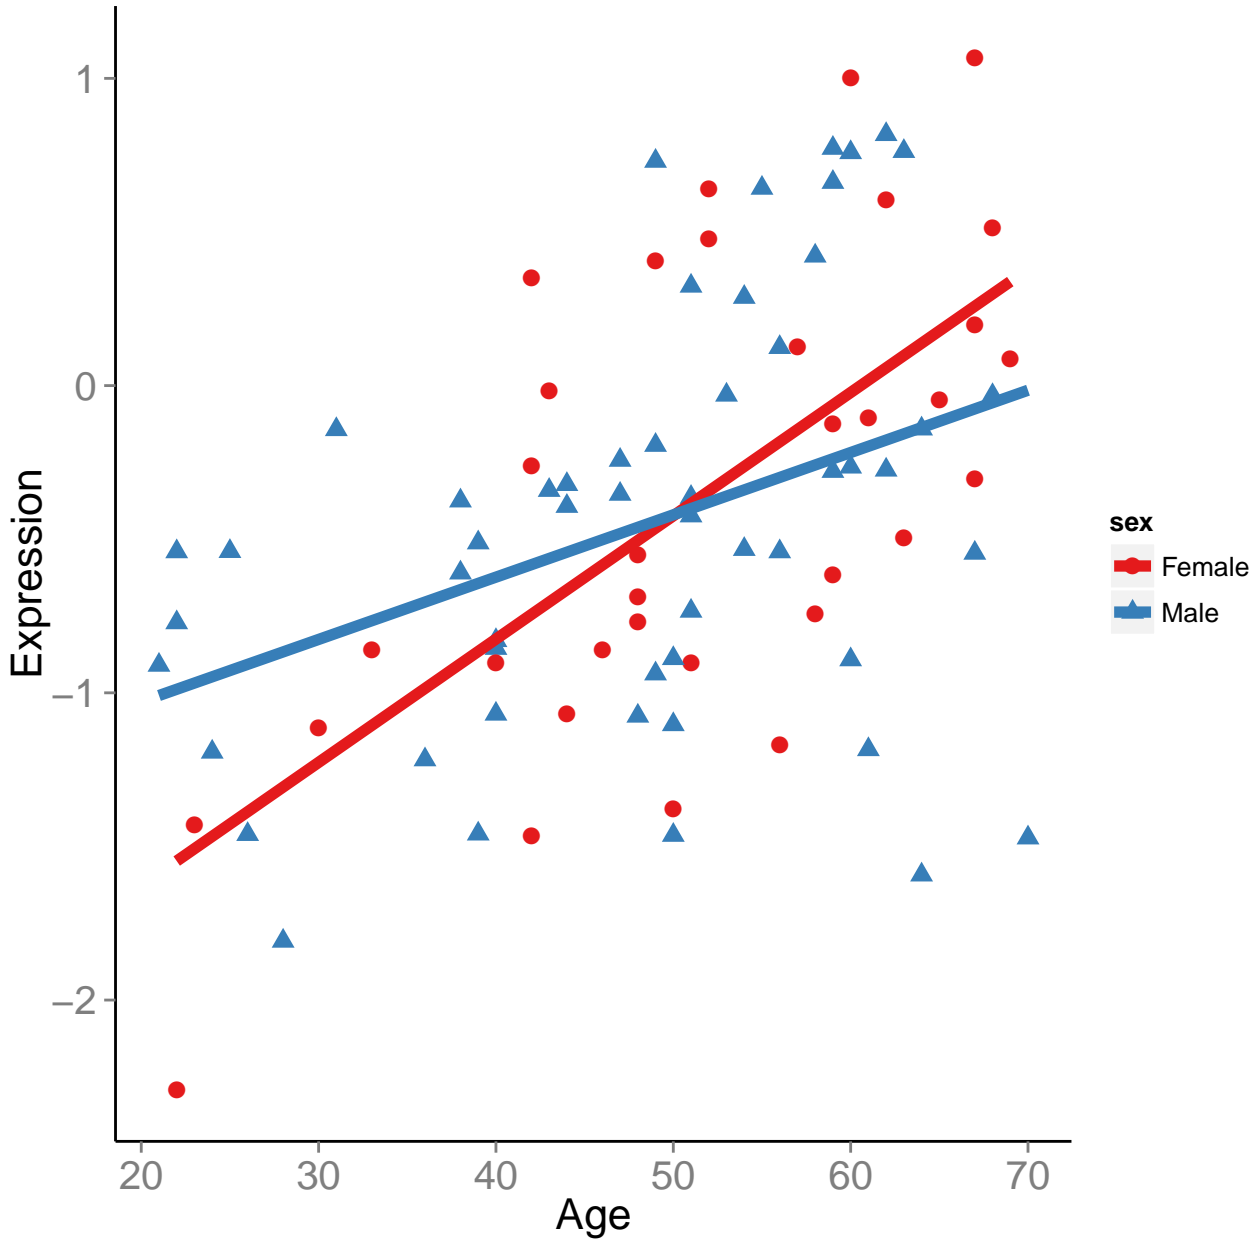



Nerve: FDXR Pearson-R=0.49 Pval=1.14E-06

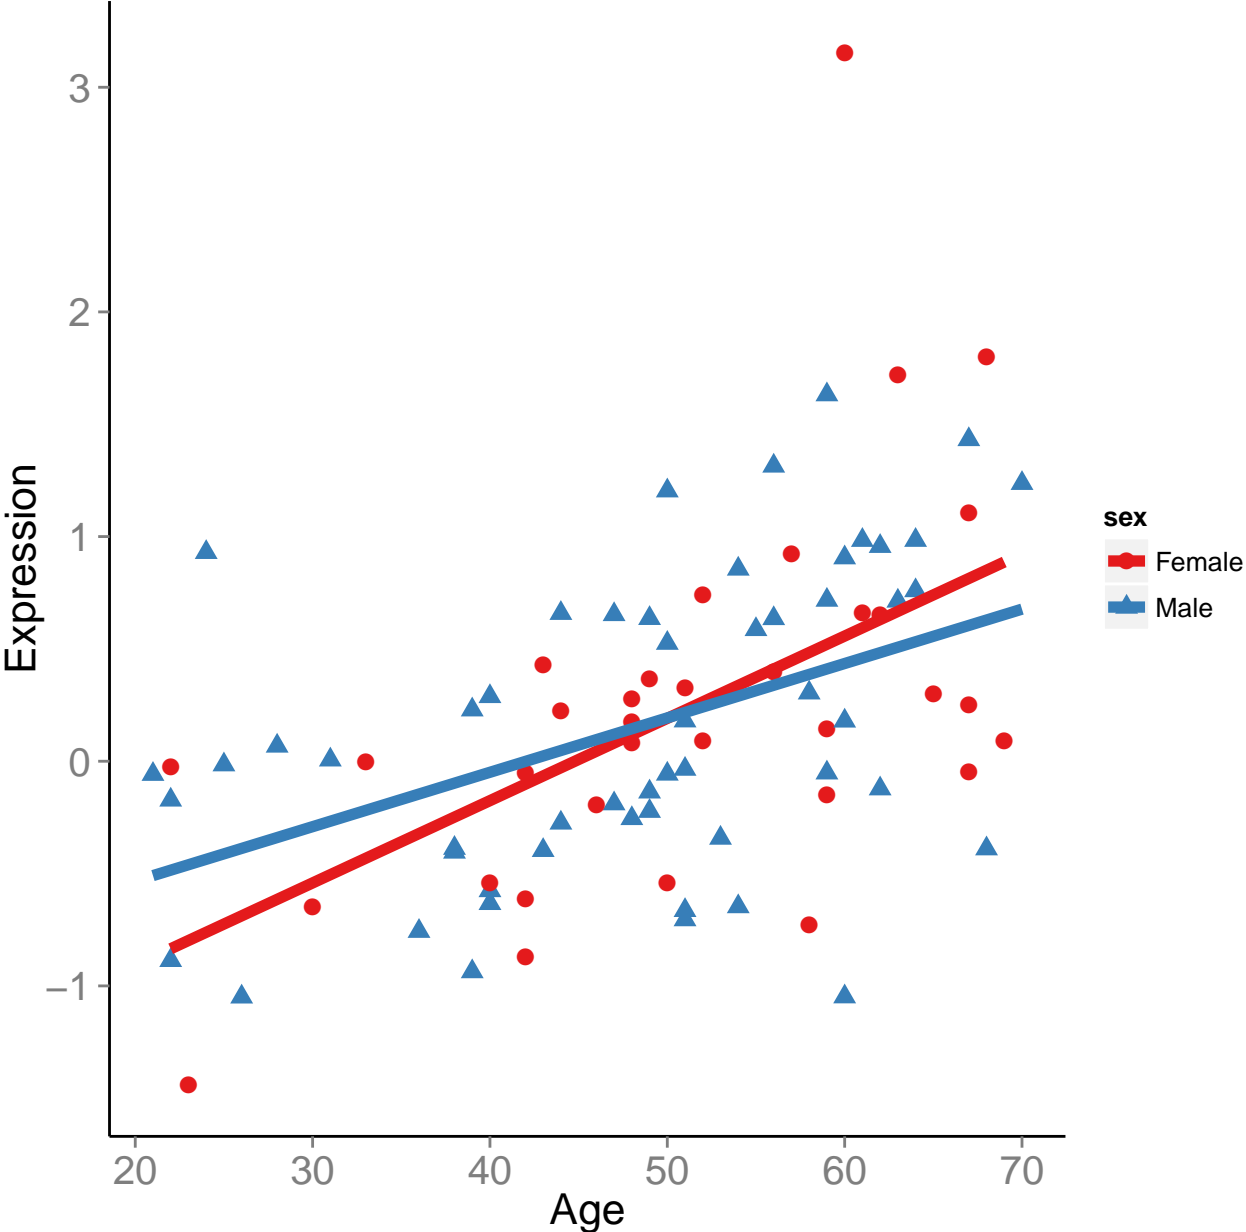

Nerve: HOXD10 Pearson-R=0.49 Pval=1.21E-06

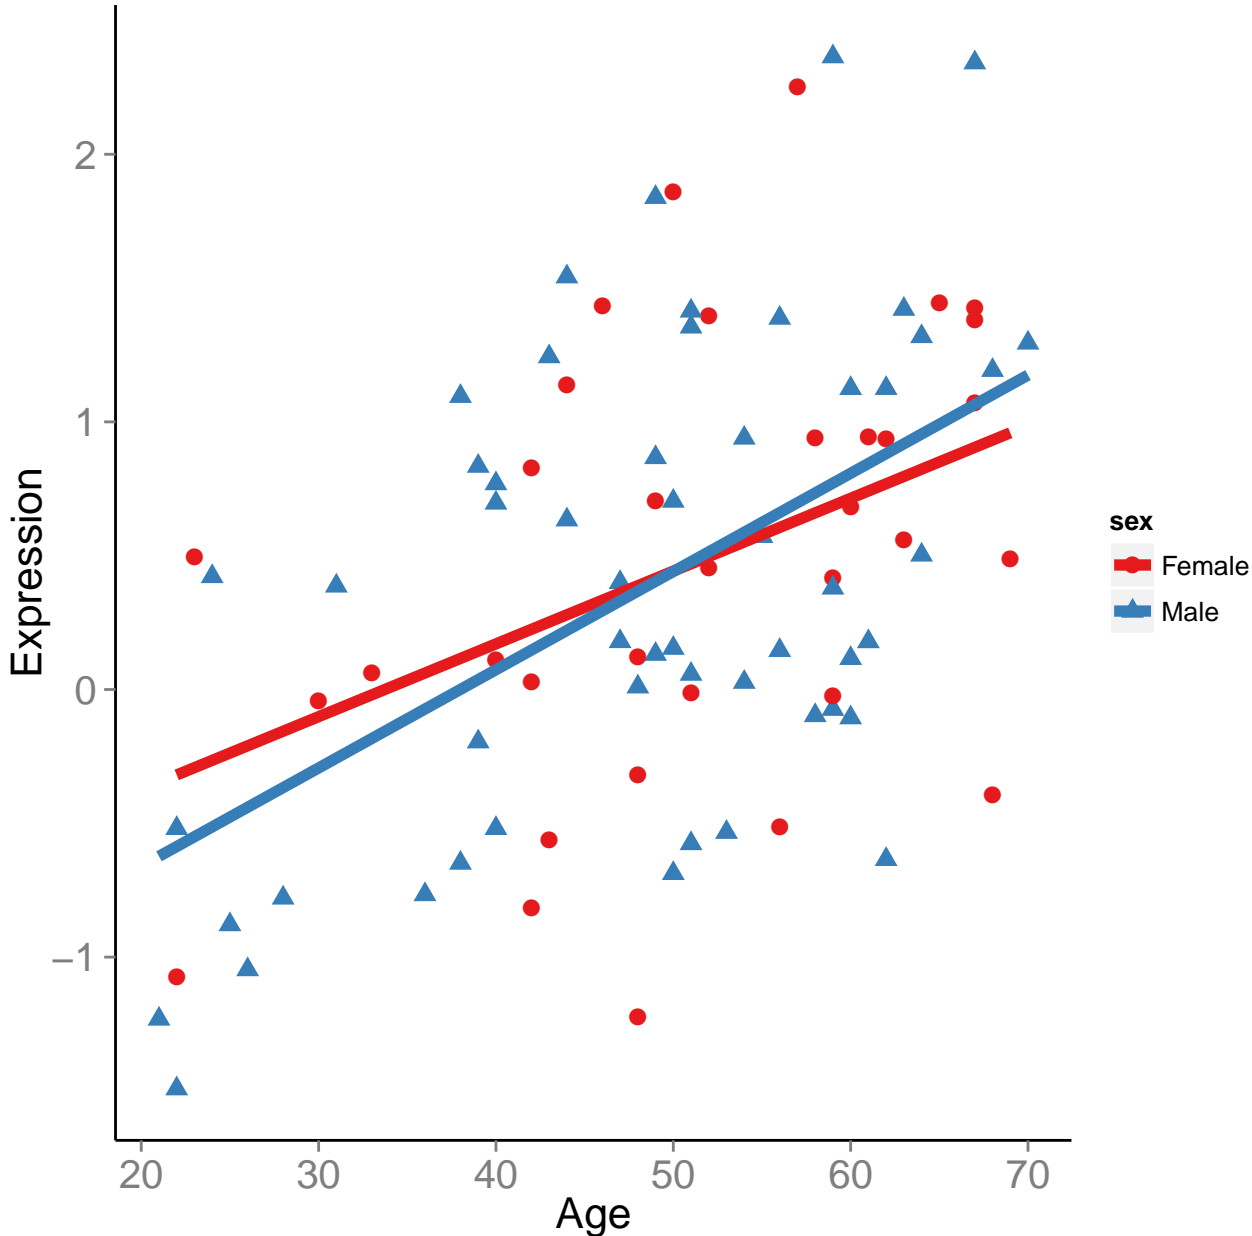

Nerve: CNTN2 Pearson-R=0.49 Pval=1.22E-06

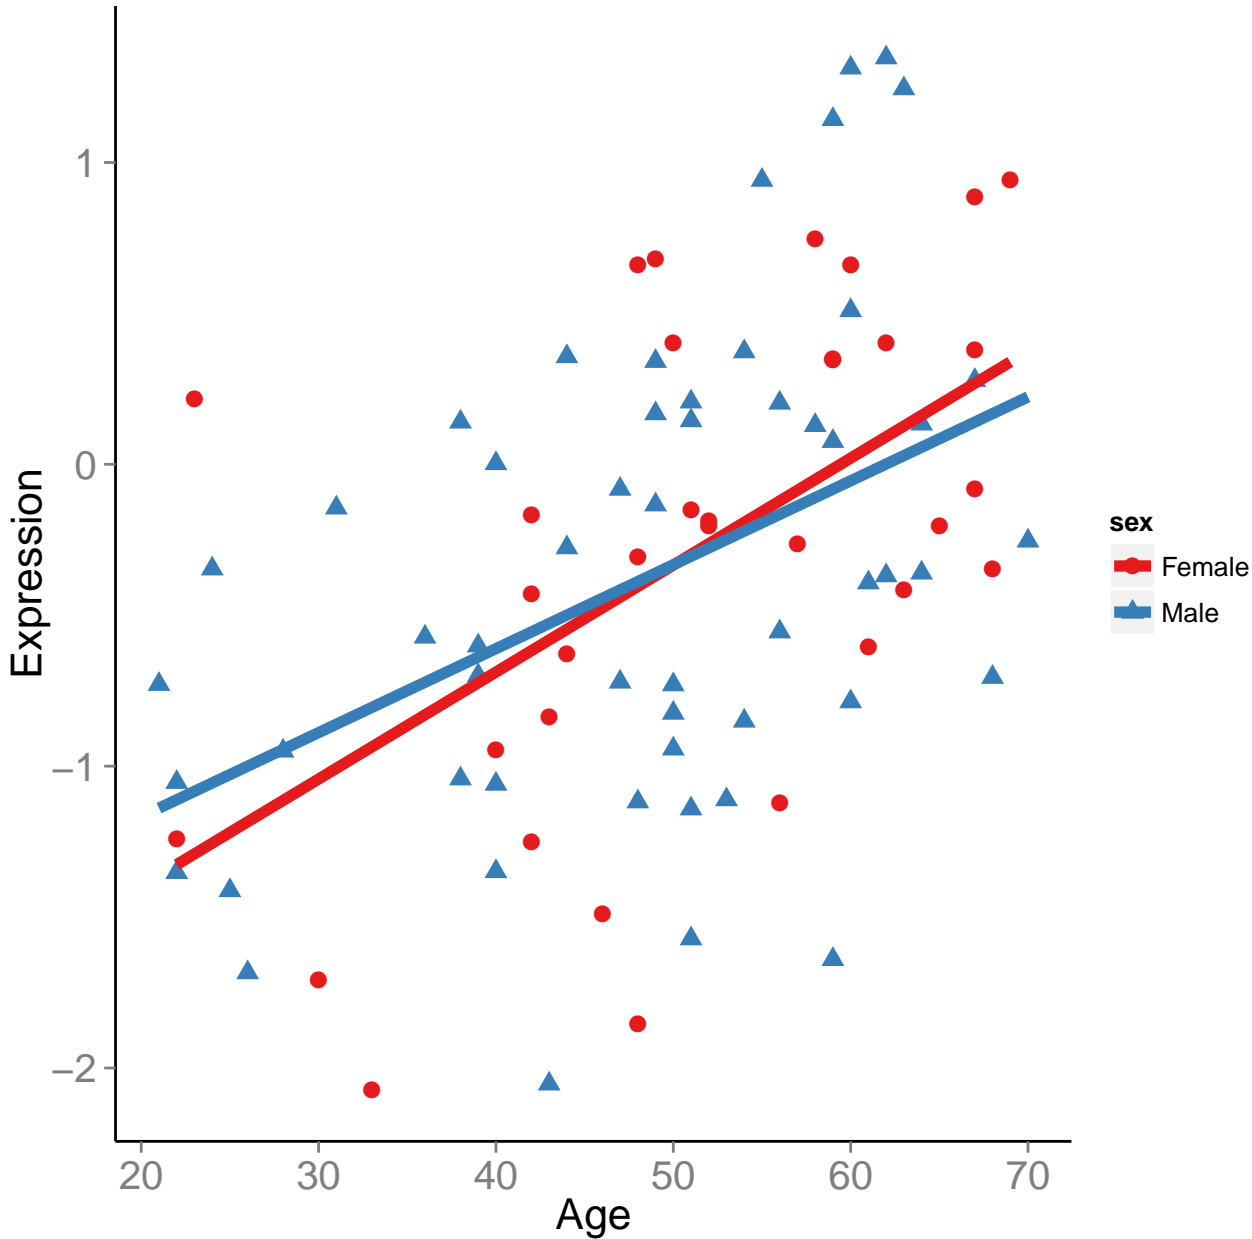

Nerve: F2R Pearson-R=0.49 Pval=1.22E-06

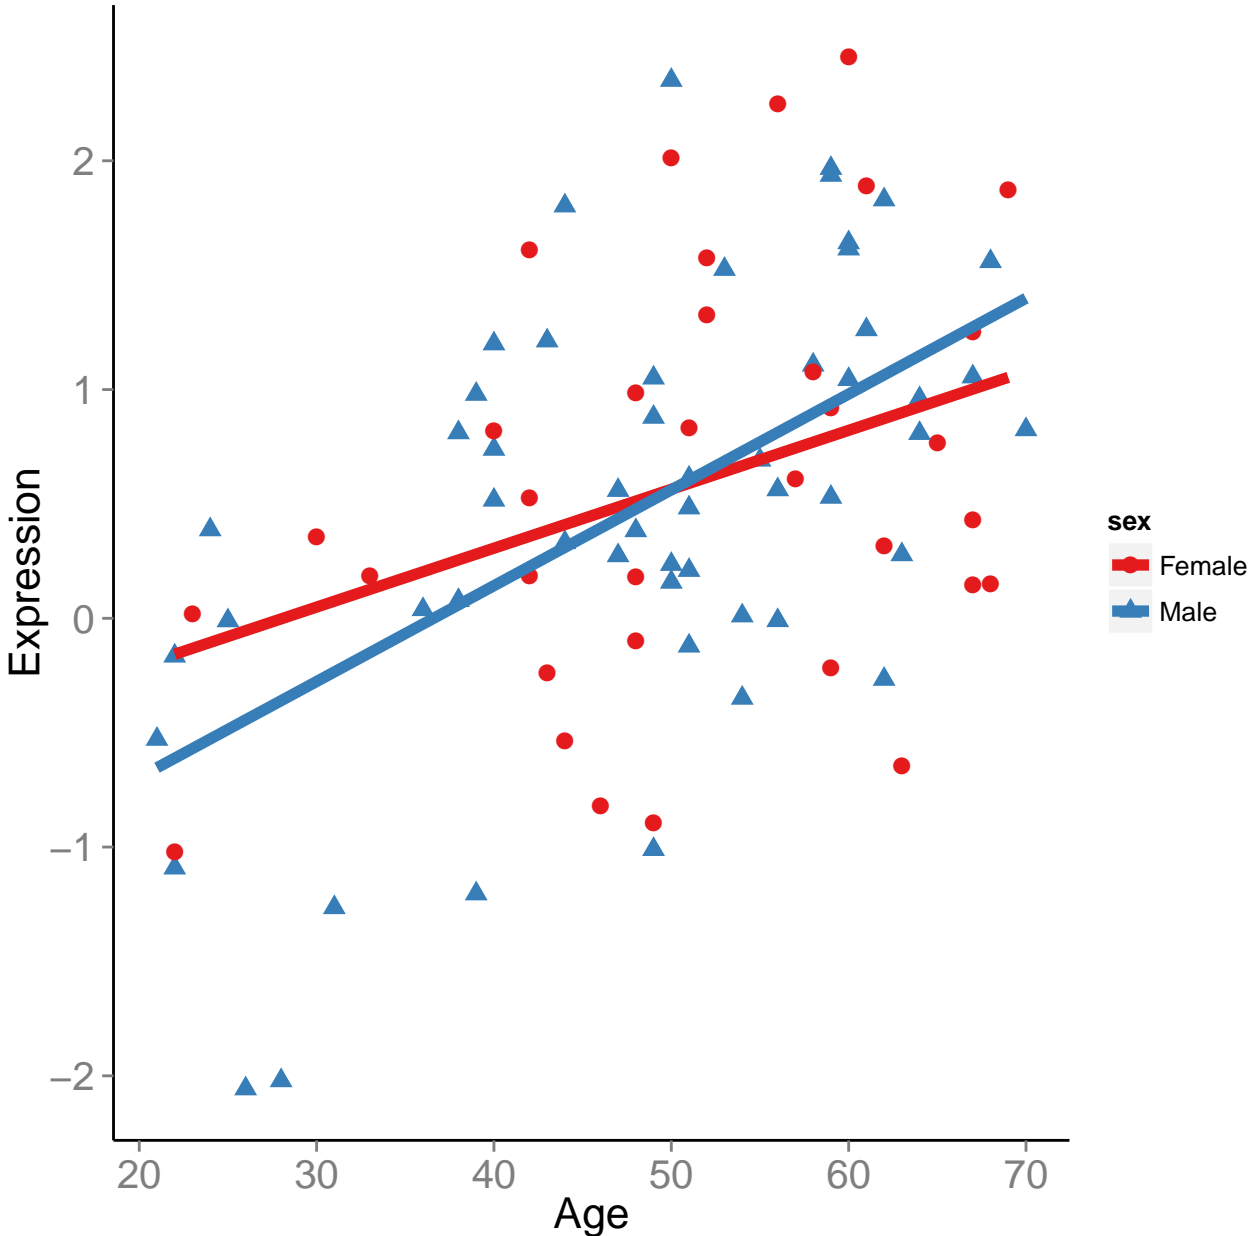

Nerve: NCAM2 Pearson-R=0.49 Pval=1.41E-06

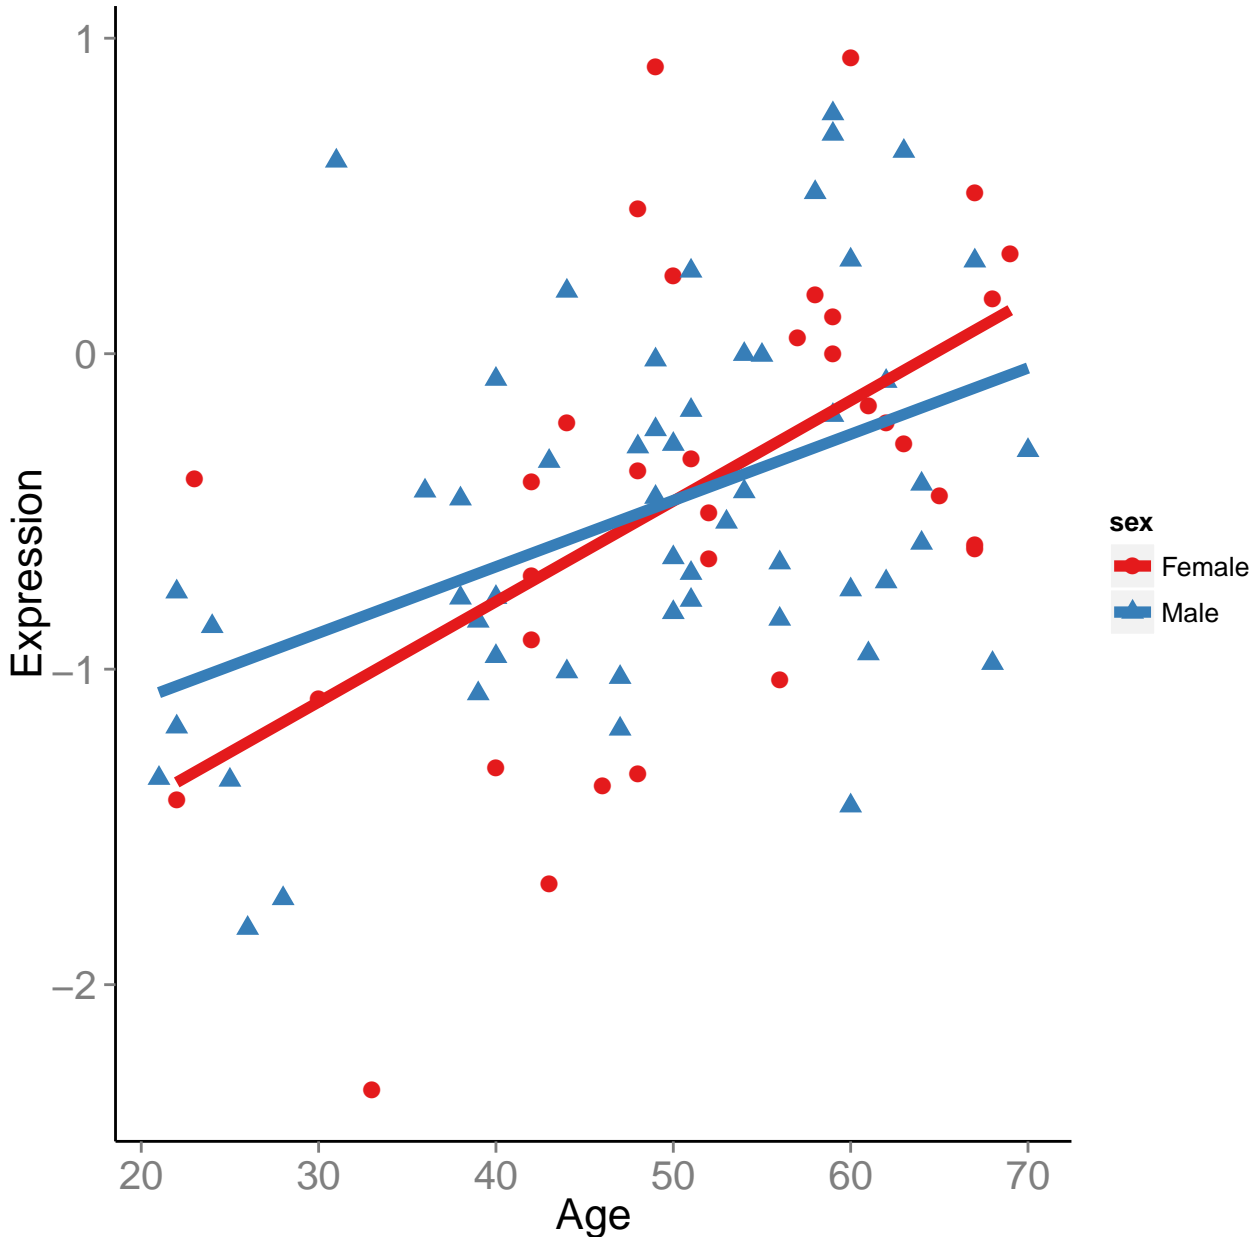

Nerve: ARHGEF4 Pearson-R=0.49 Pval=1.66E-06

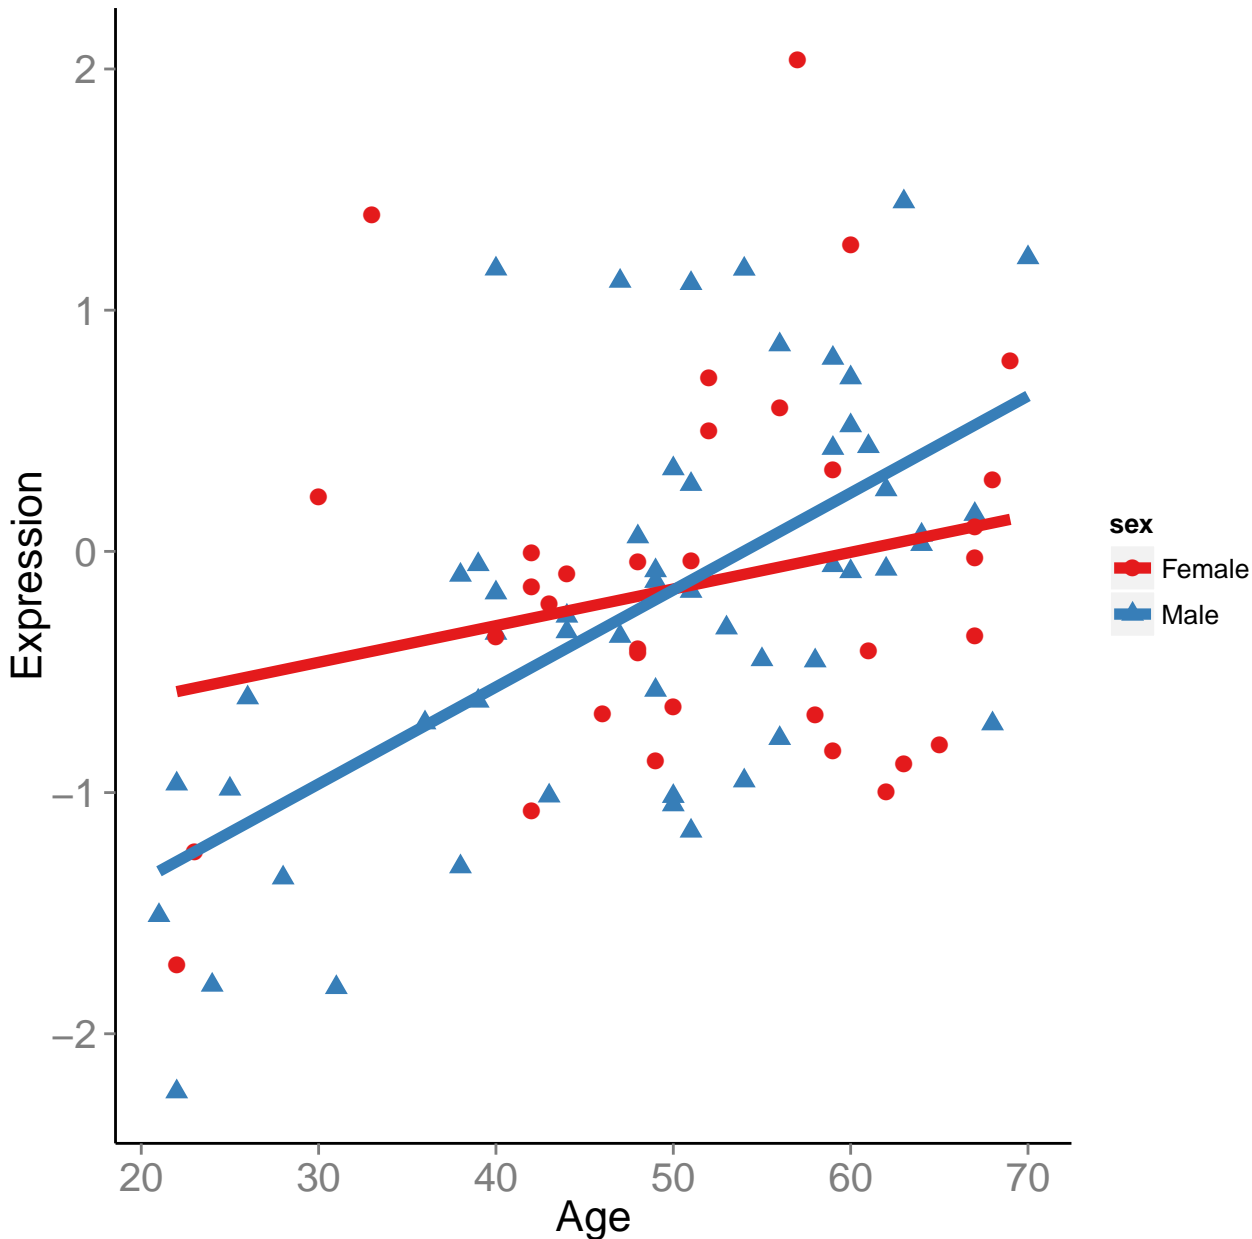

Nerve: NADKD1 Pearson-R=-0.48 Pval=1.71E-06

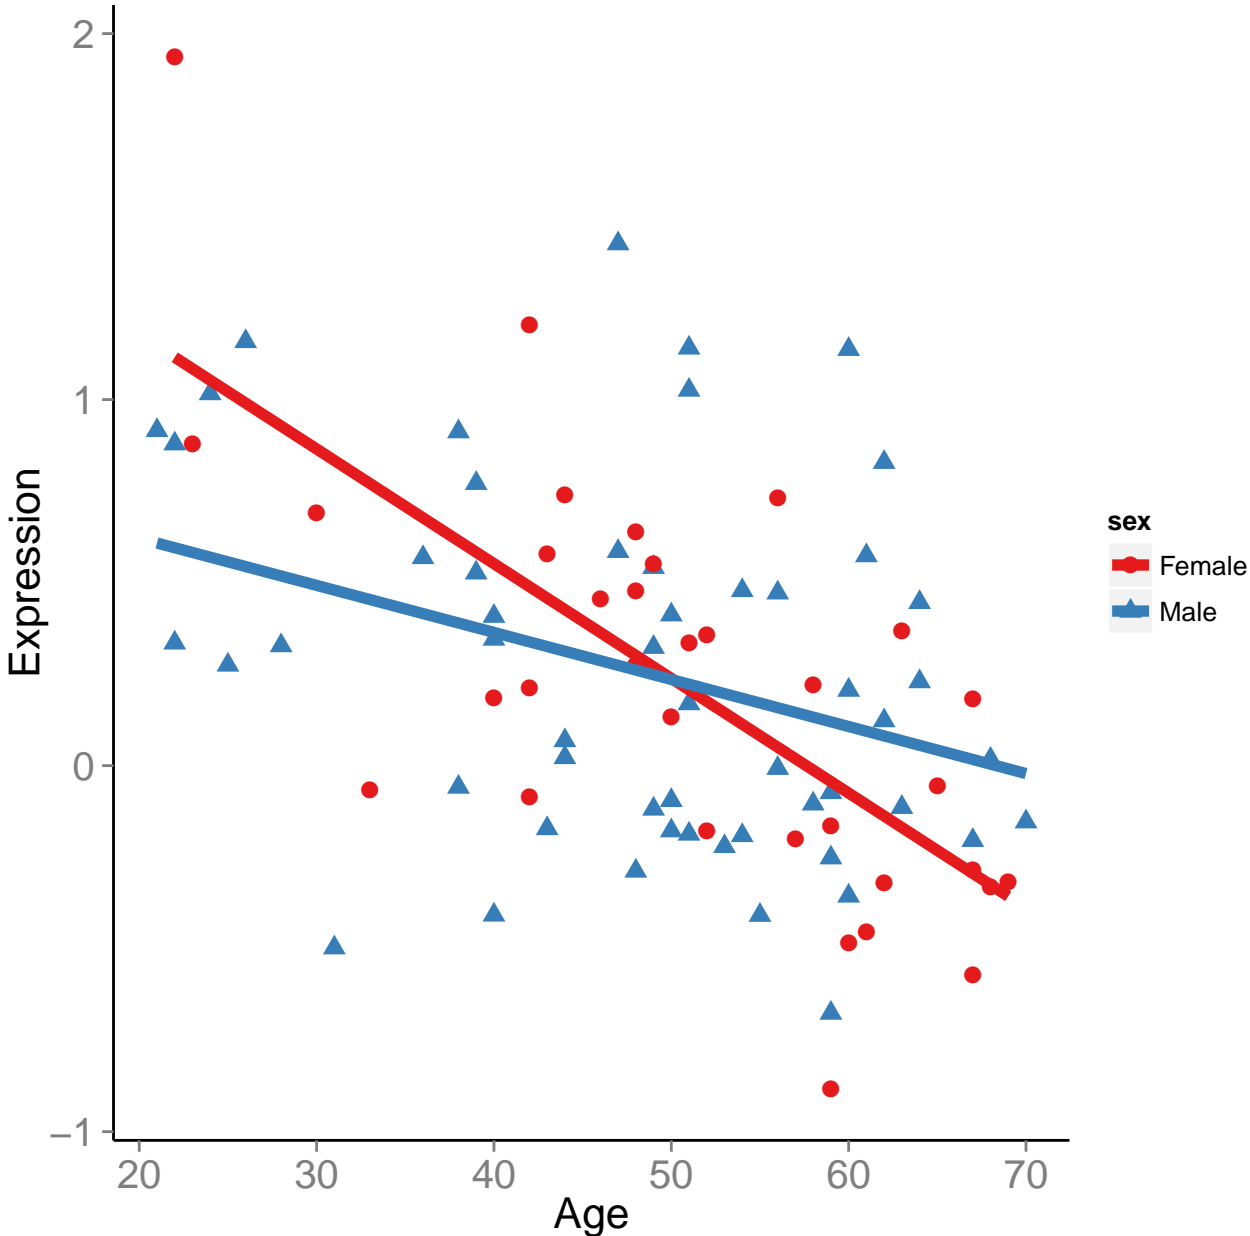

Nerve: WIPF1 Pearson-R=0.48 Pval=1.83E-06

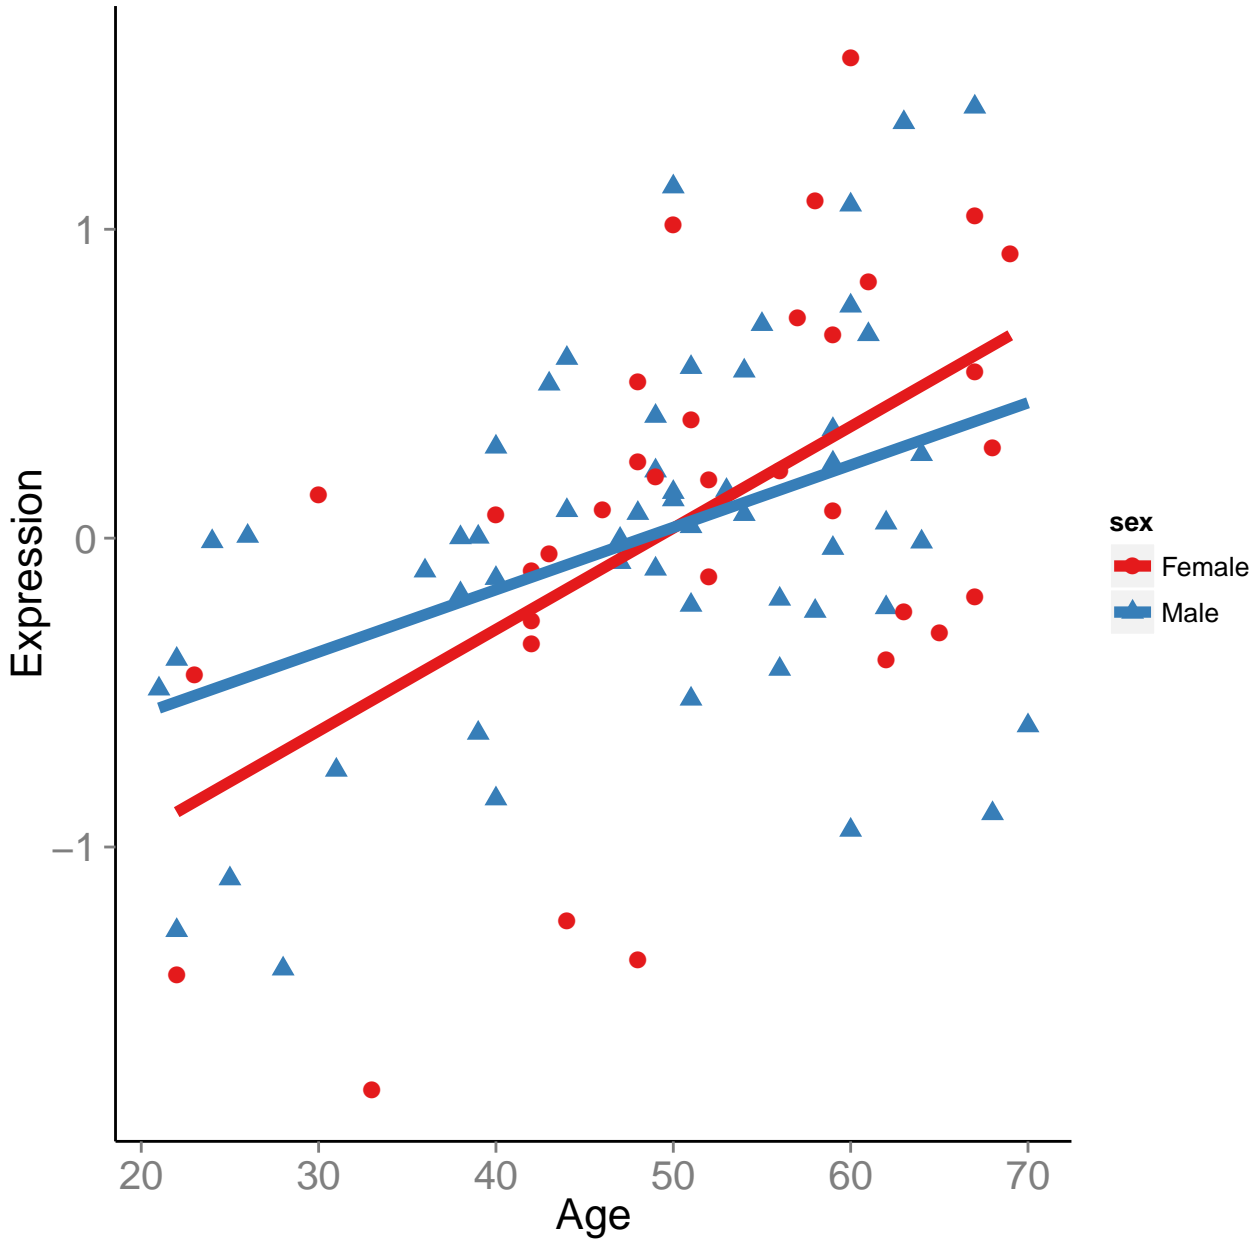



Nerve: NEK1 Pearson-R=-0.48 Pval=1.82E-06

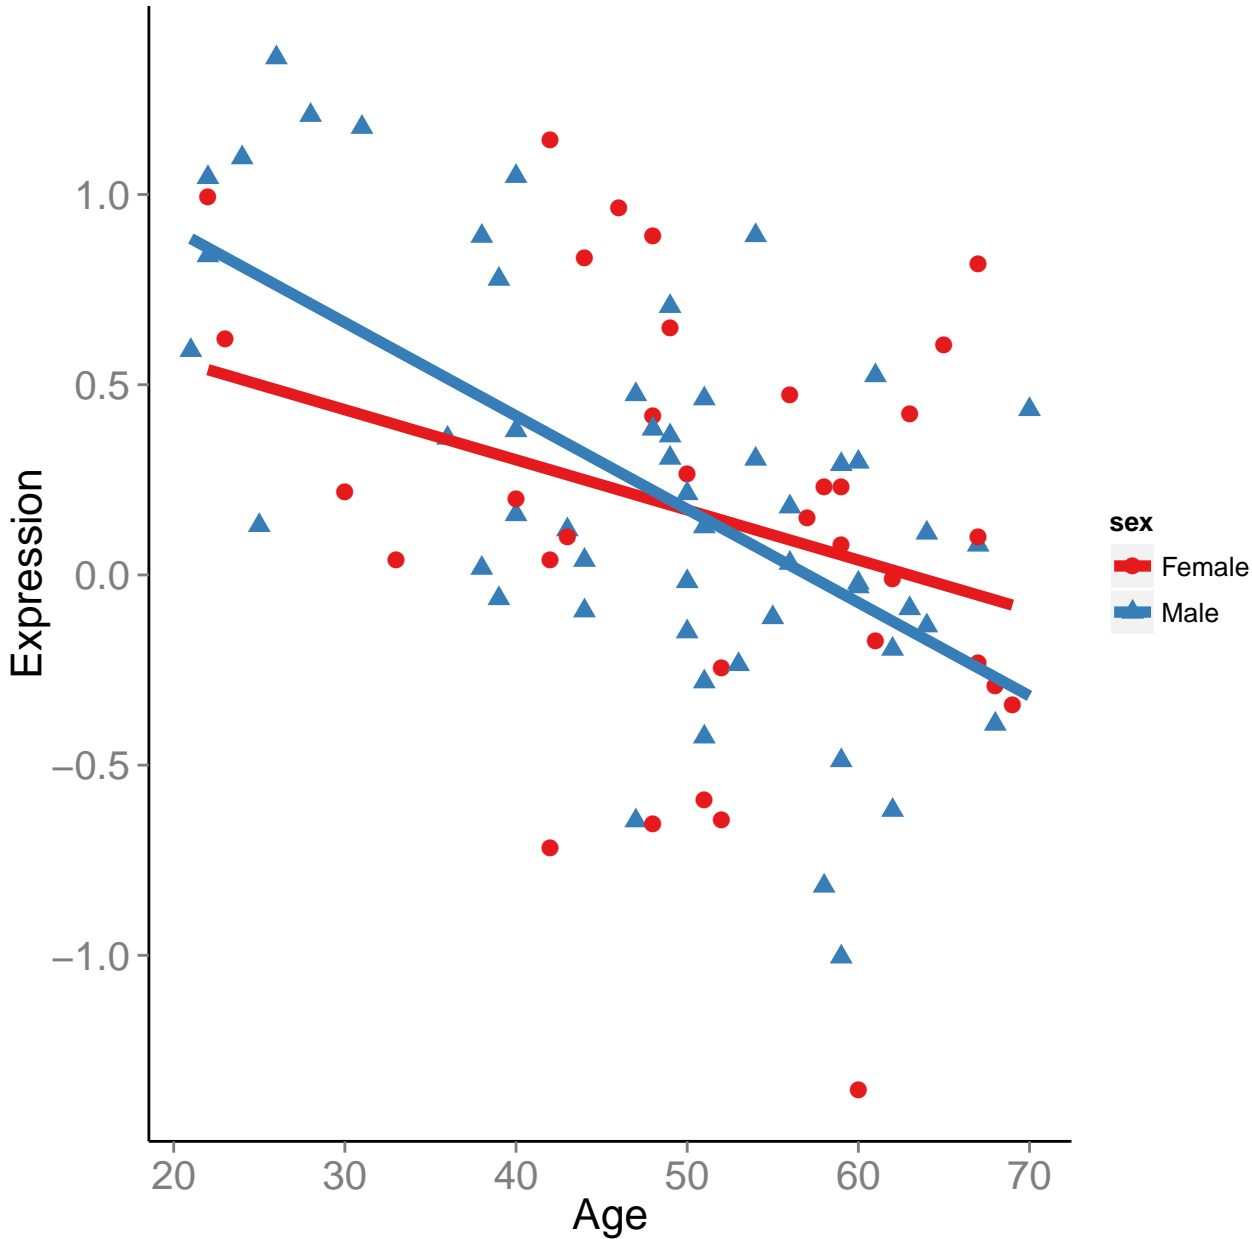

Nerve: PEG3 Pearson-R=0.48 Pval=1.91E-06

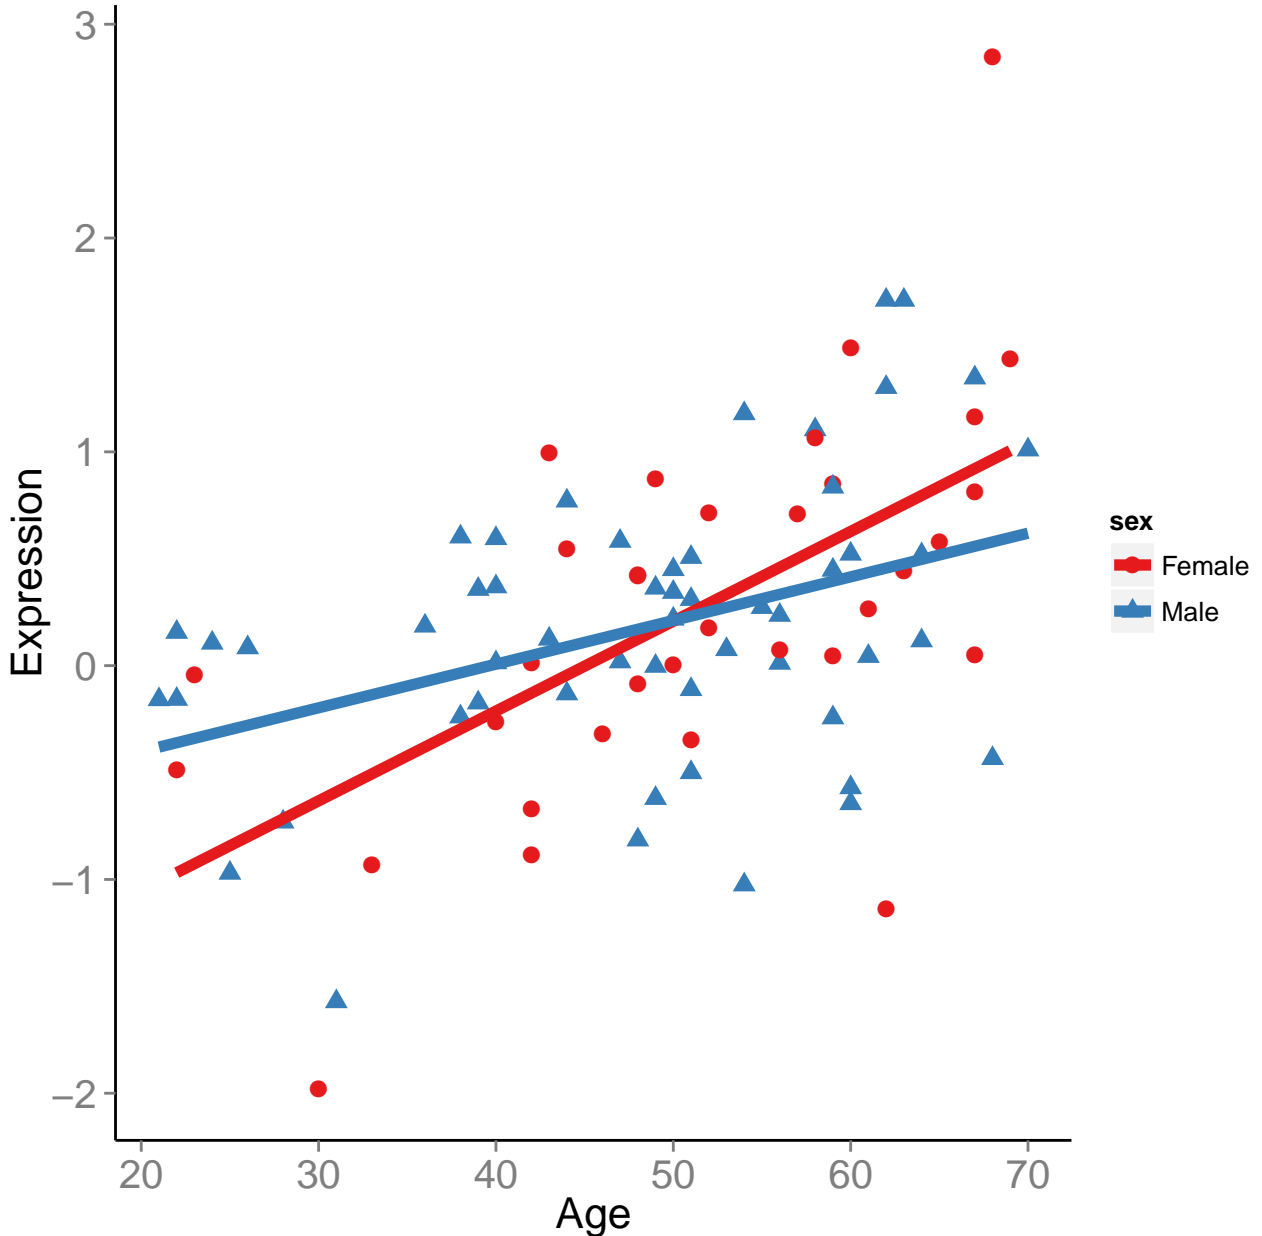

Nerve: RP4-555D20.2 Pearson-R=-0.48 Pval=1.92E-06

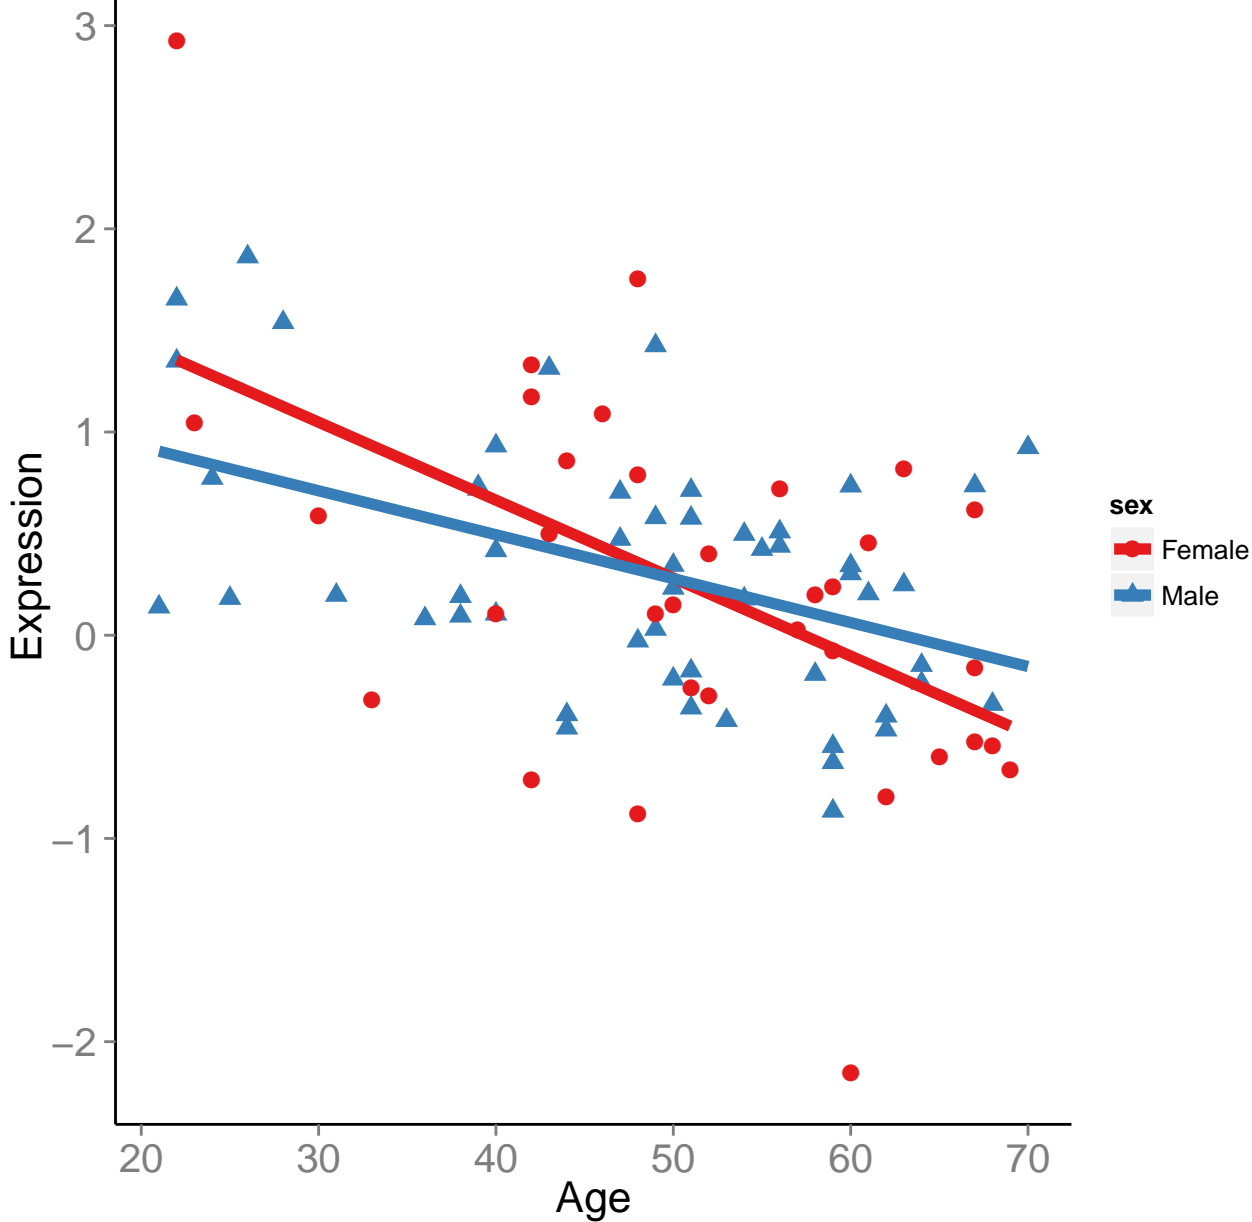

Nerve: PREX1 Pearson-R=0.48 Pval=2.04E-06

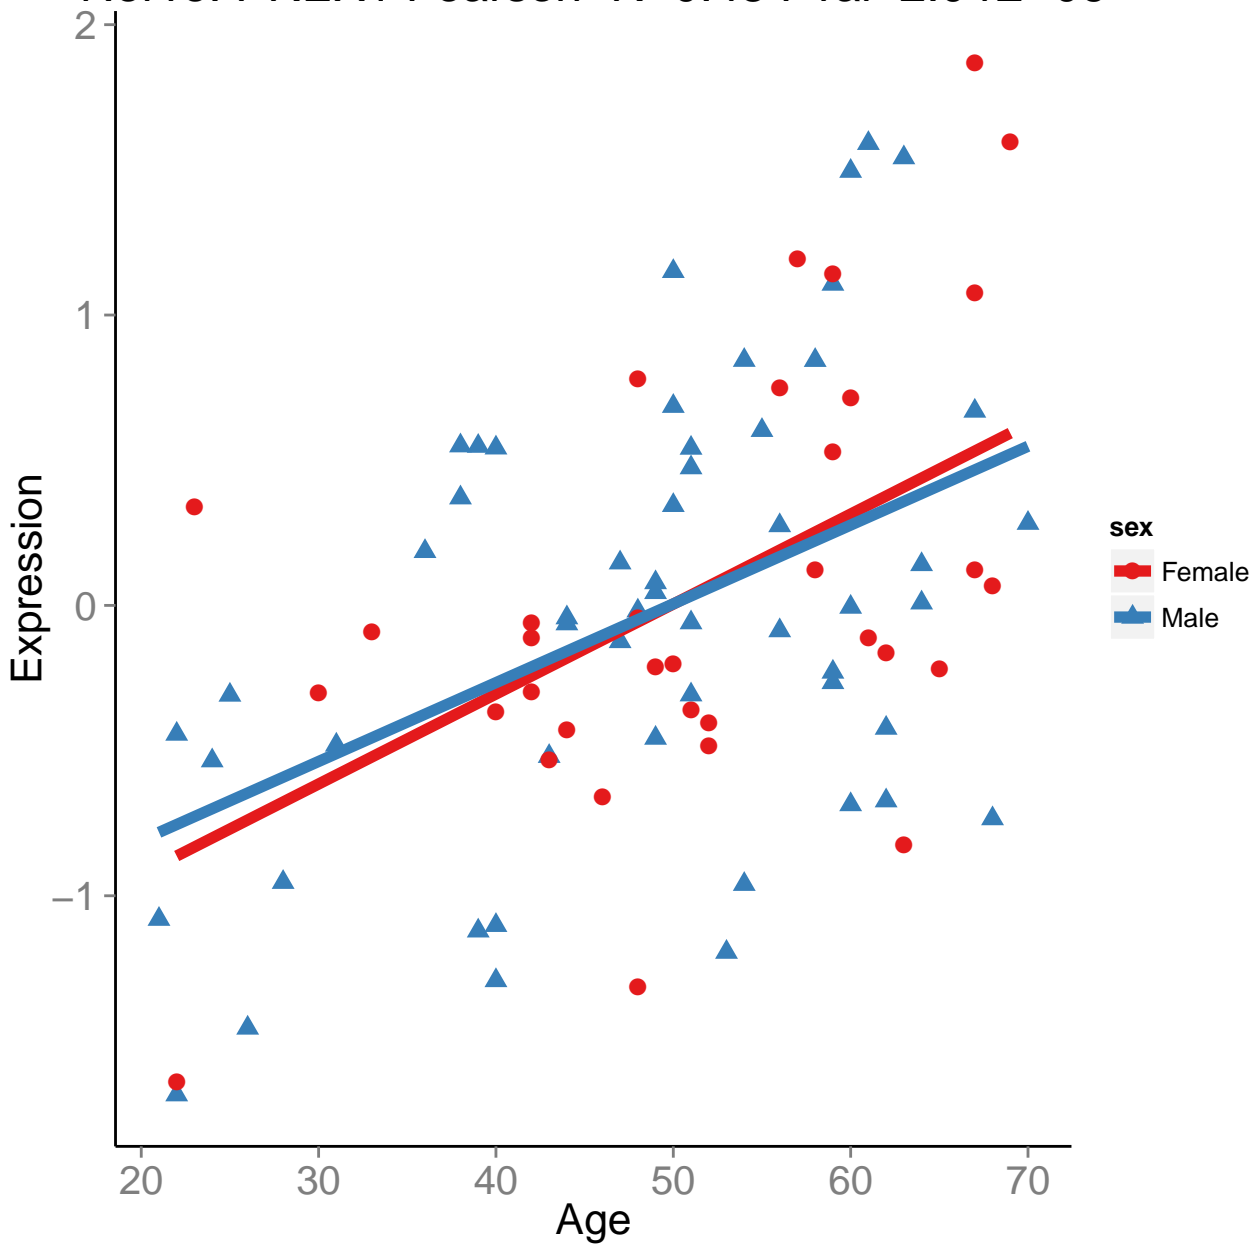

Nerve: PTPRZ1 Pearson-R=0.48 Pval=2.35E-06

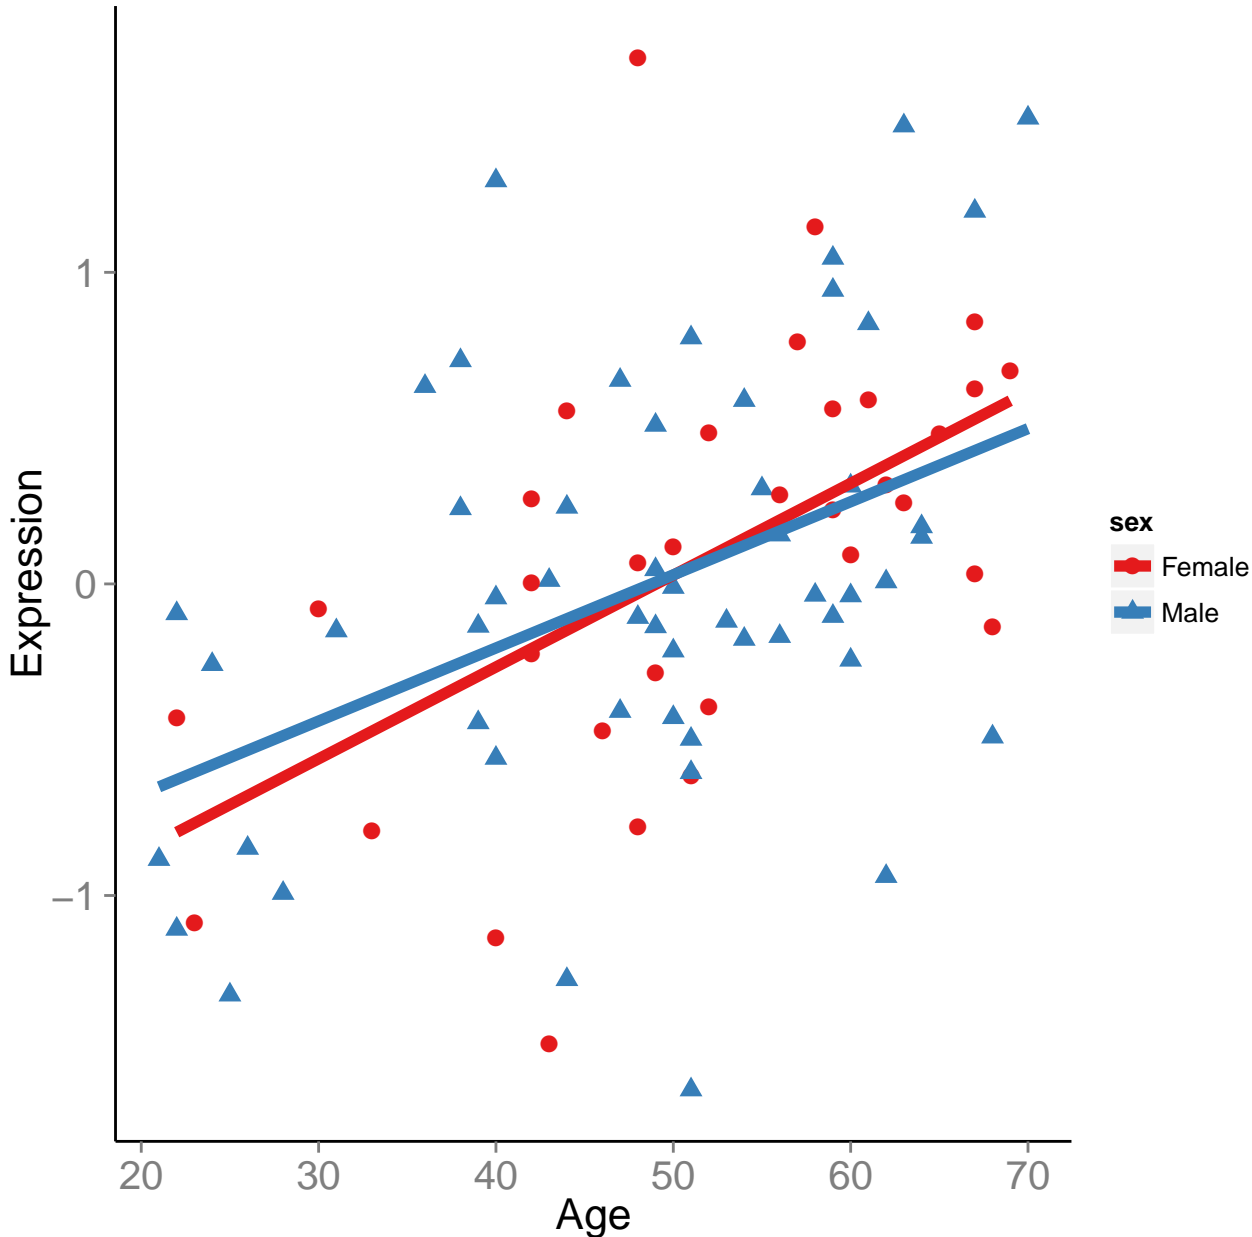

Nerve: FOXO1 Pearson-R=0.48 Pval=2.38E-06

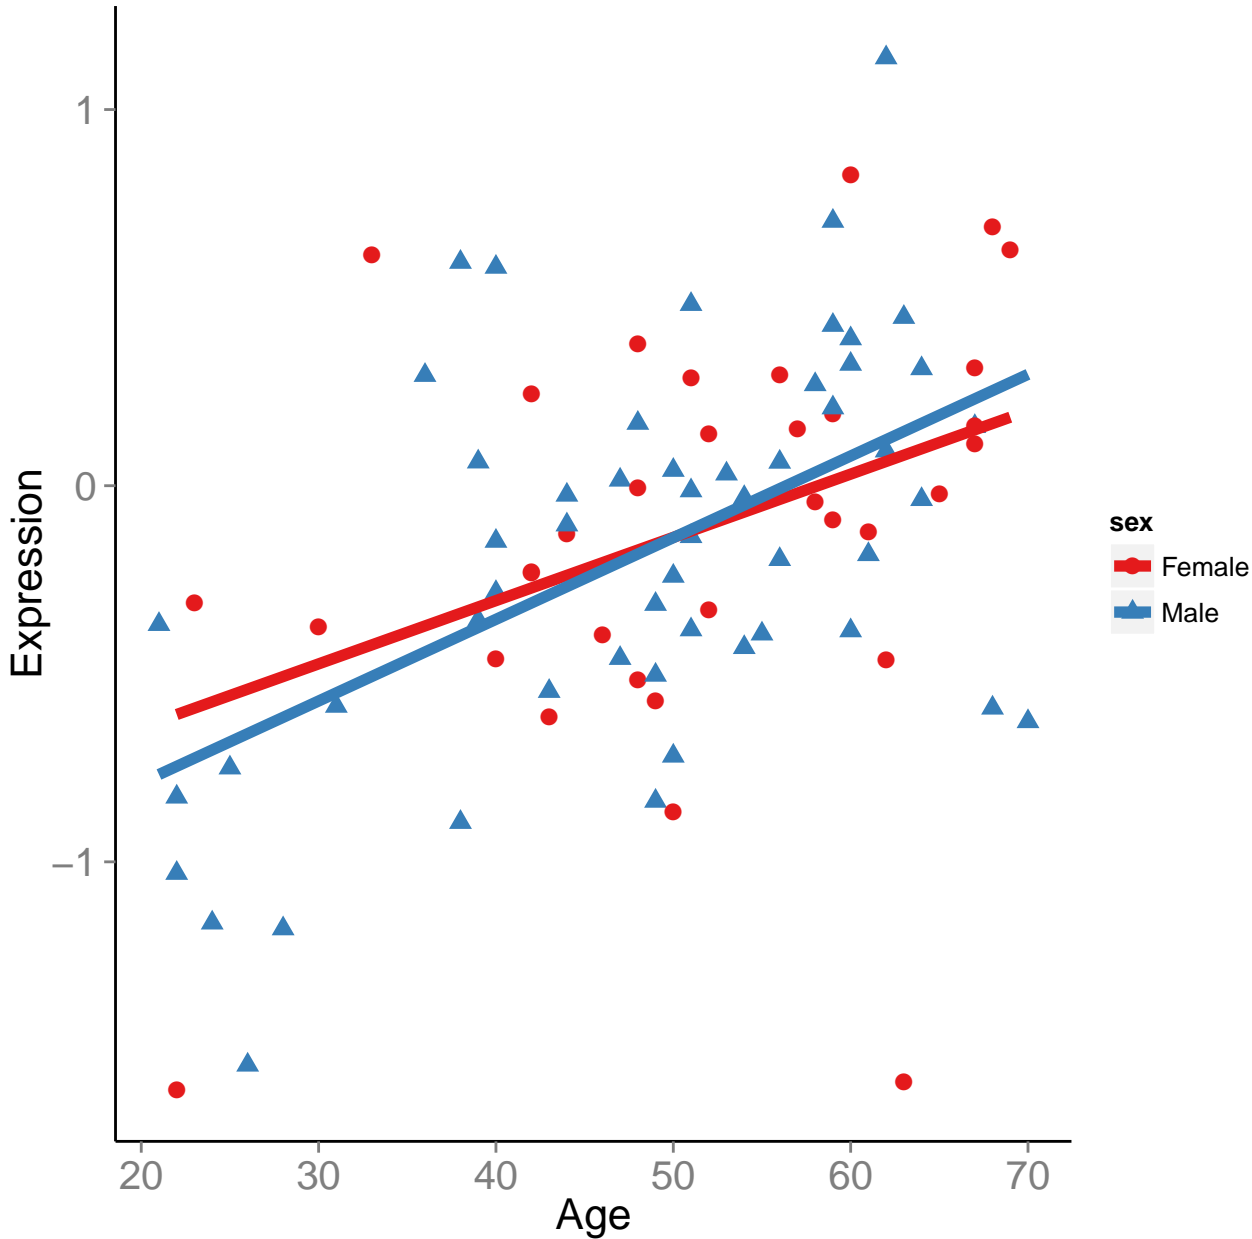

Nerve: MPP5 Pearson-R=-0.48 Pval=2.42E-06

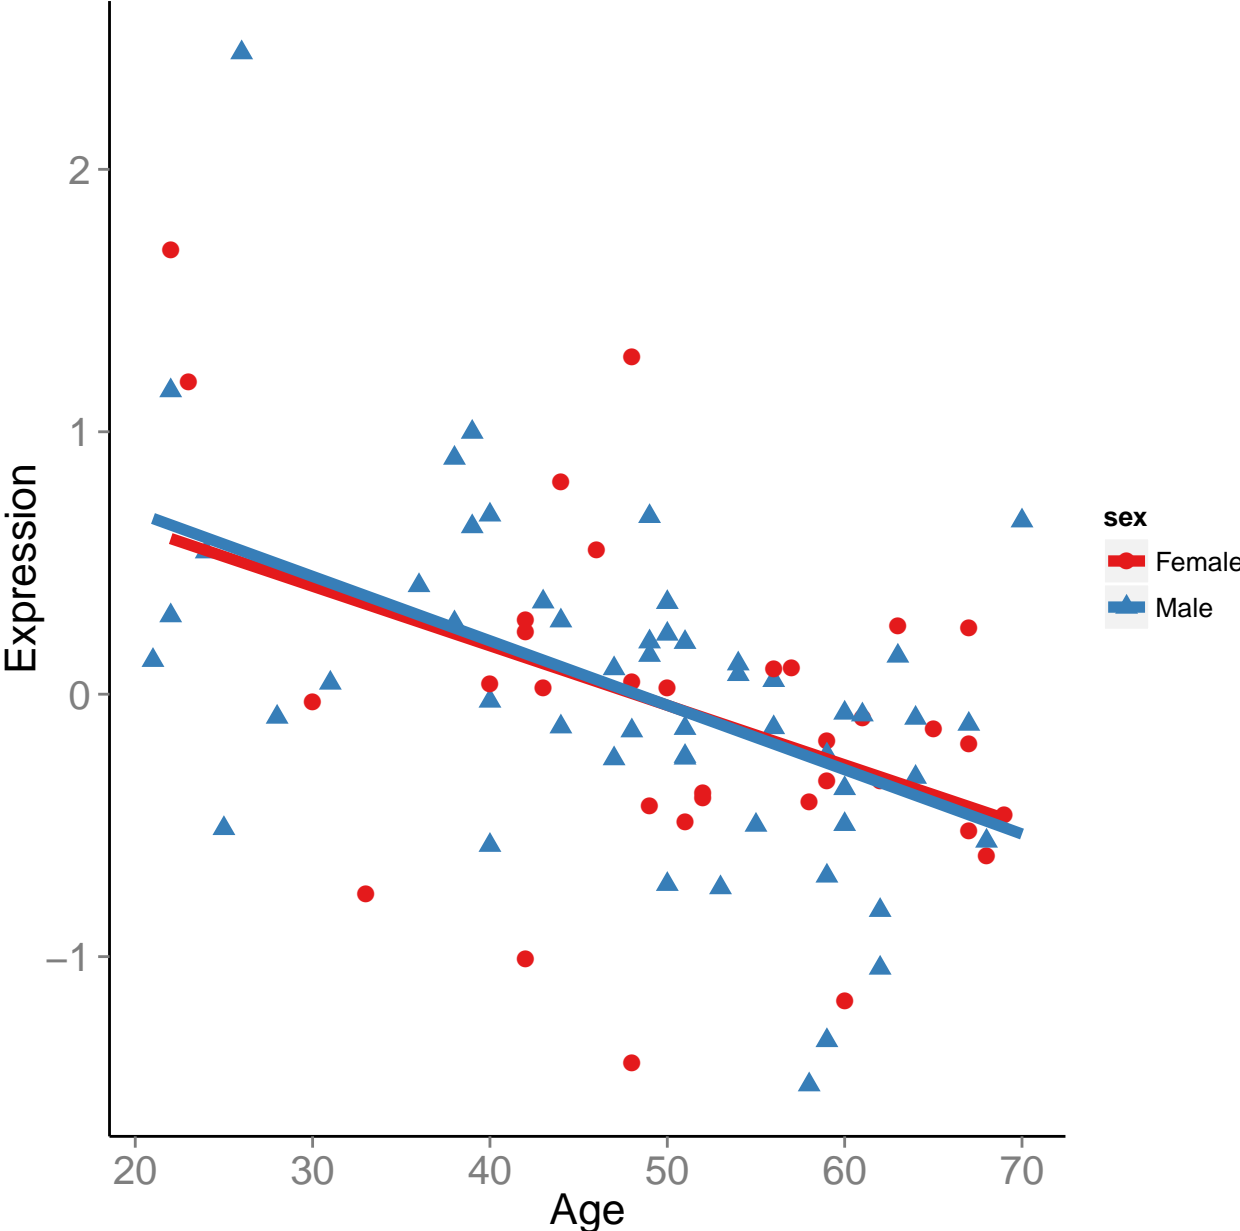

Nerve: LHPP Pearson-R=-0.48 Pval=2.39E-06

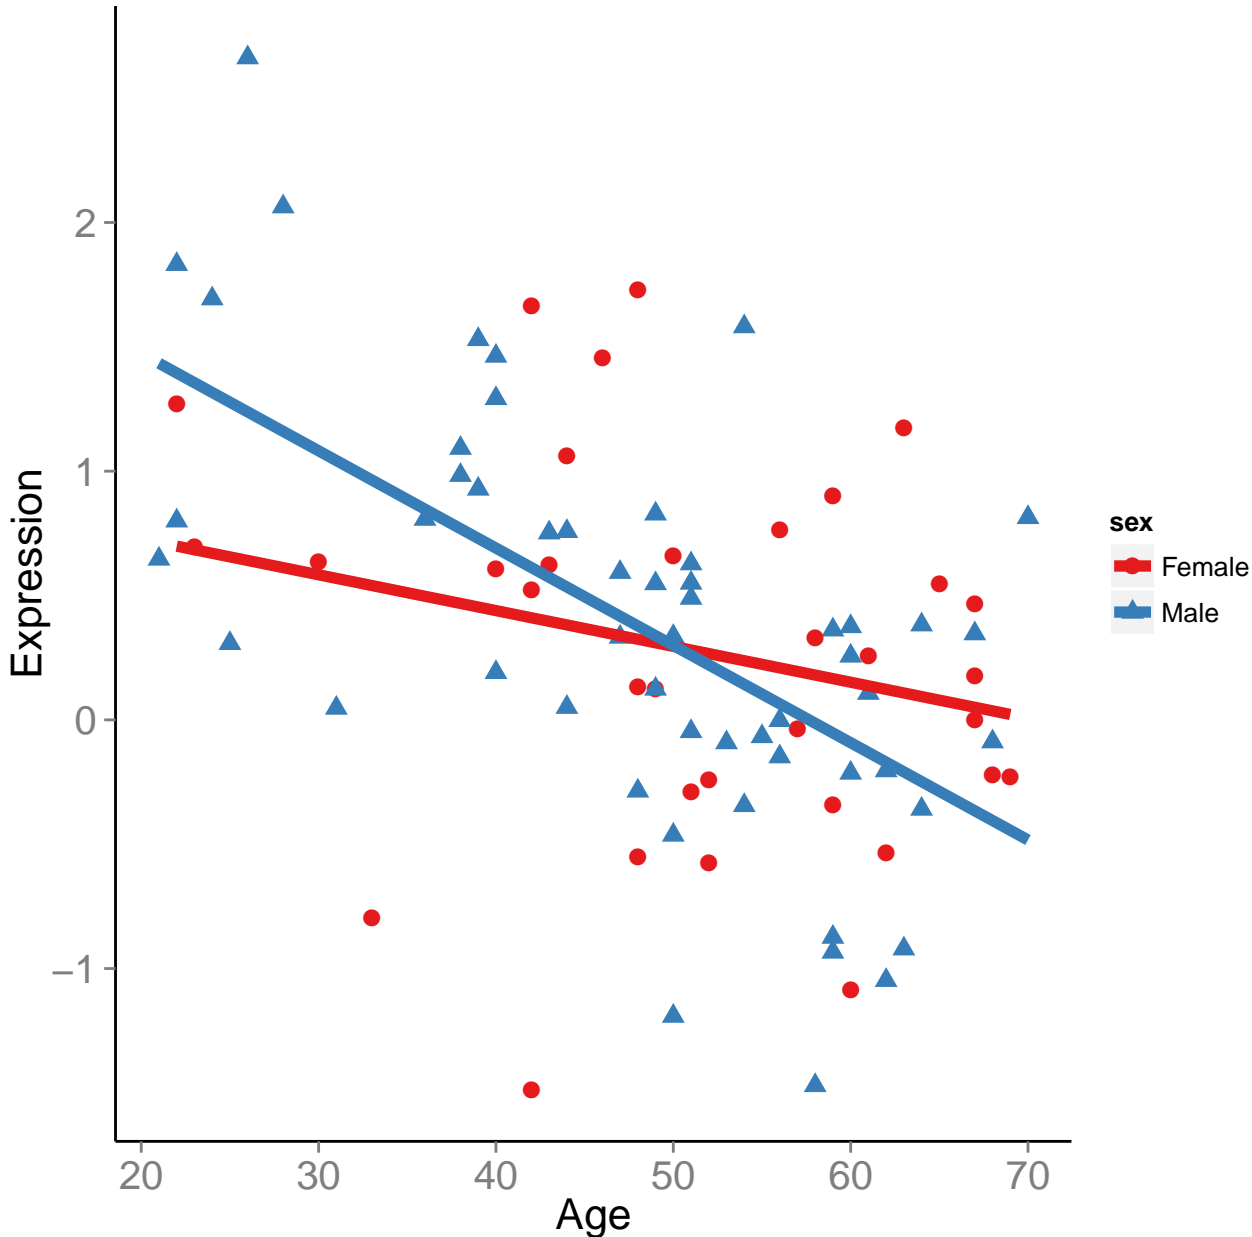



Nerve: LCTL Pearson-R=-0.48 Pval=2.52E-06

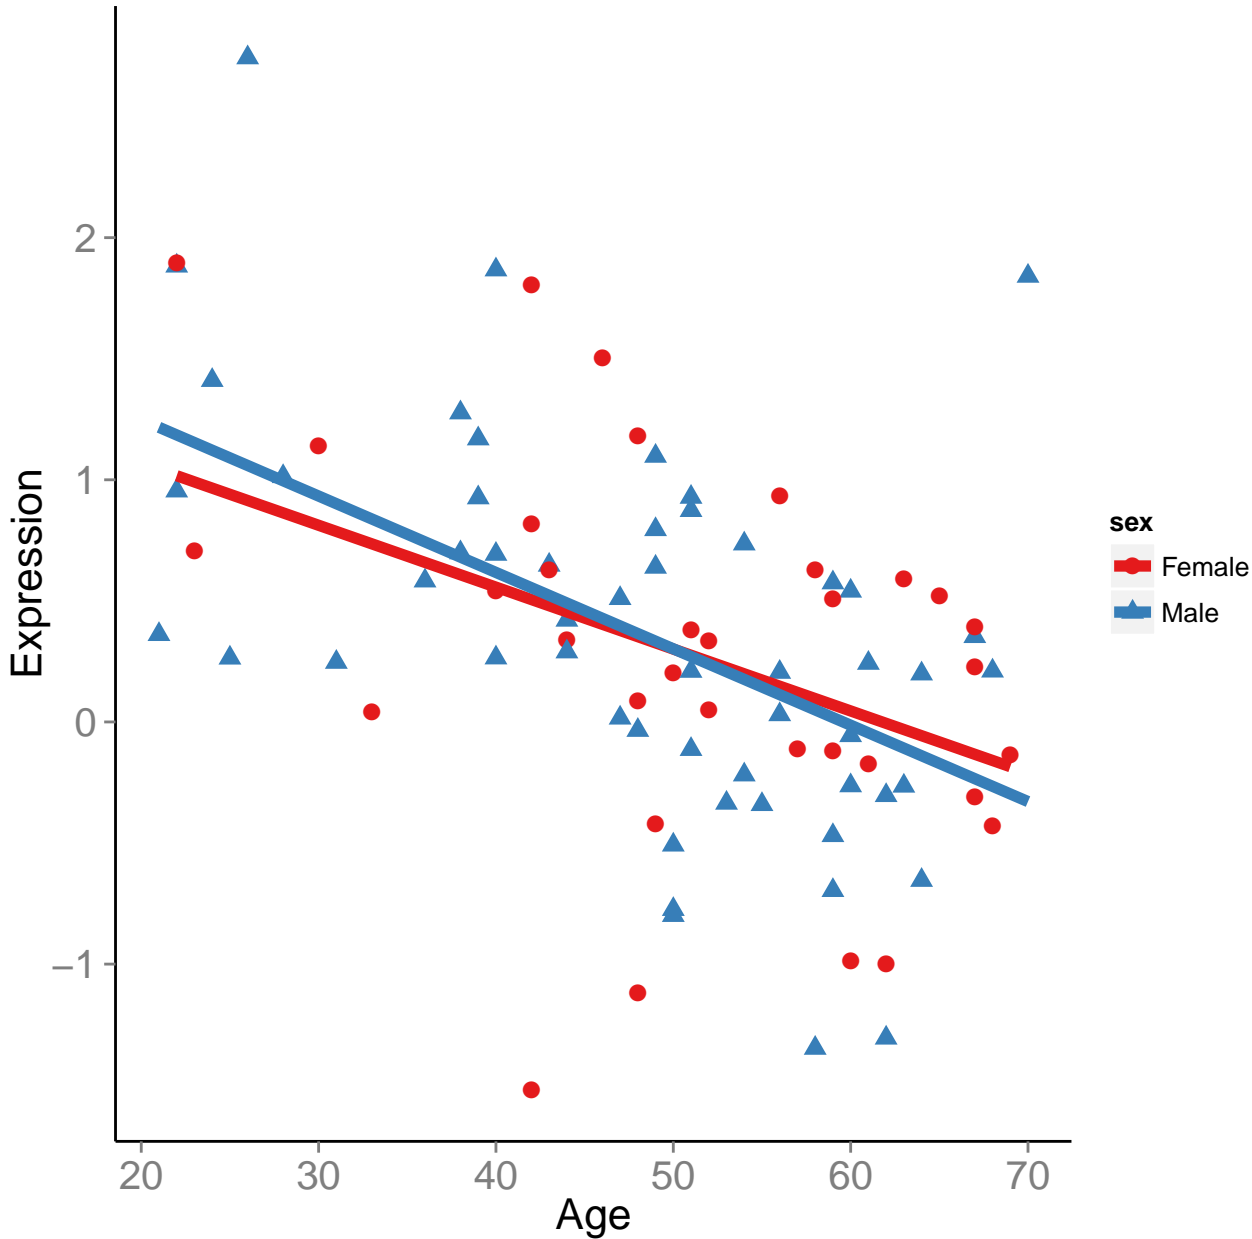

Nerve: AC114947.1 Pearson-R=0.48 Pval=2.68E-06

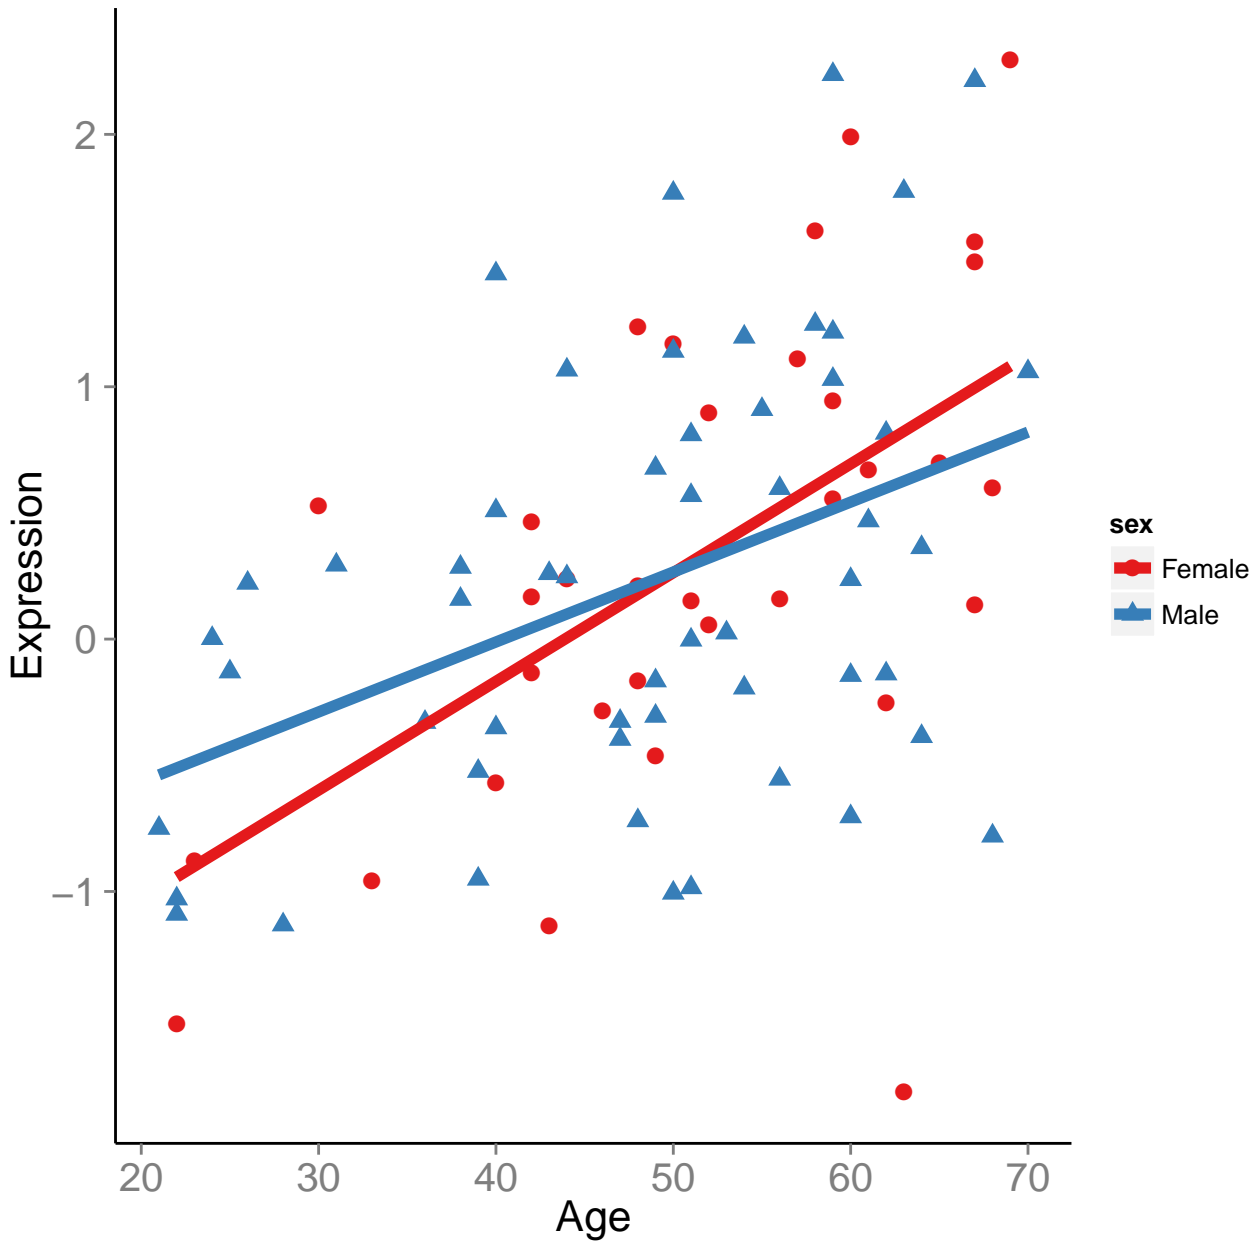

Nerve: RP11-401P9.4 Pearson-R=-0.48 Pval=2.76E-06

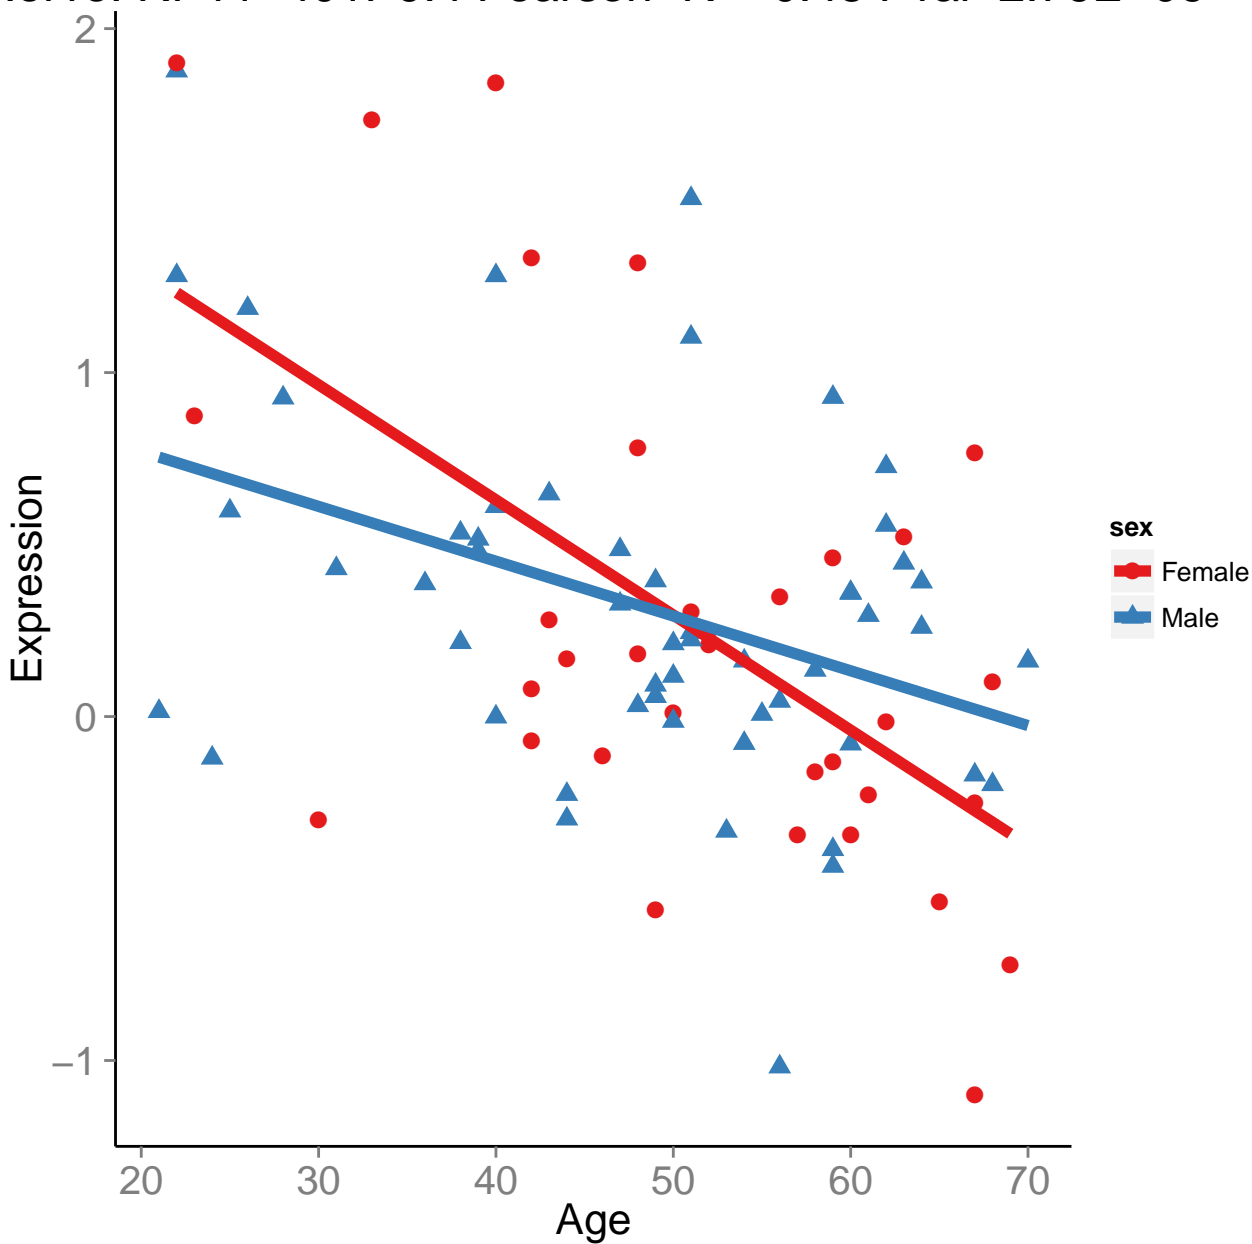

Nerve: AC008746.3 Pearson-R=0.48 Pval=2.83E-06

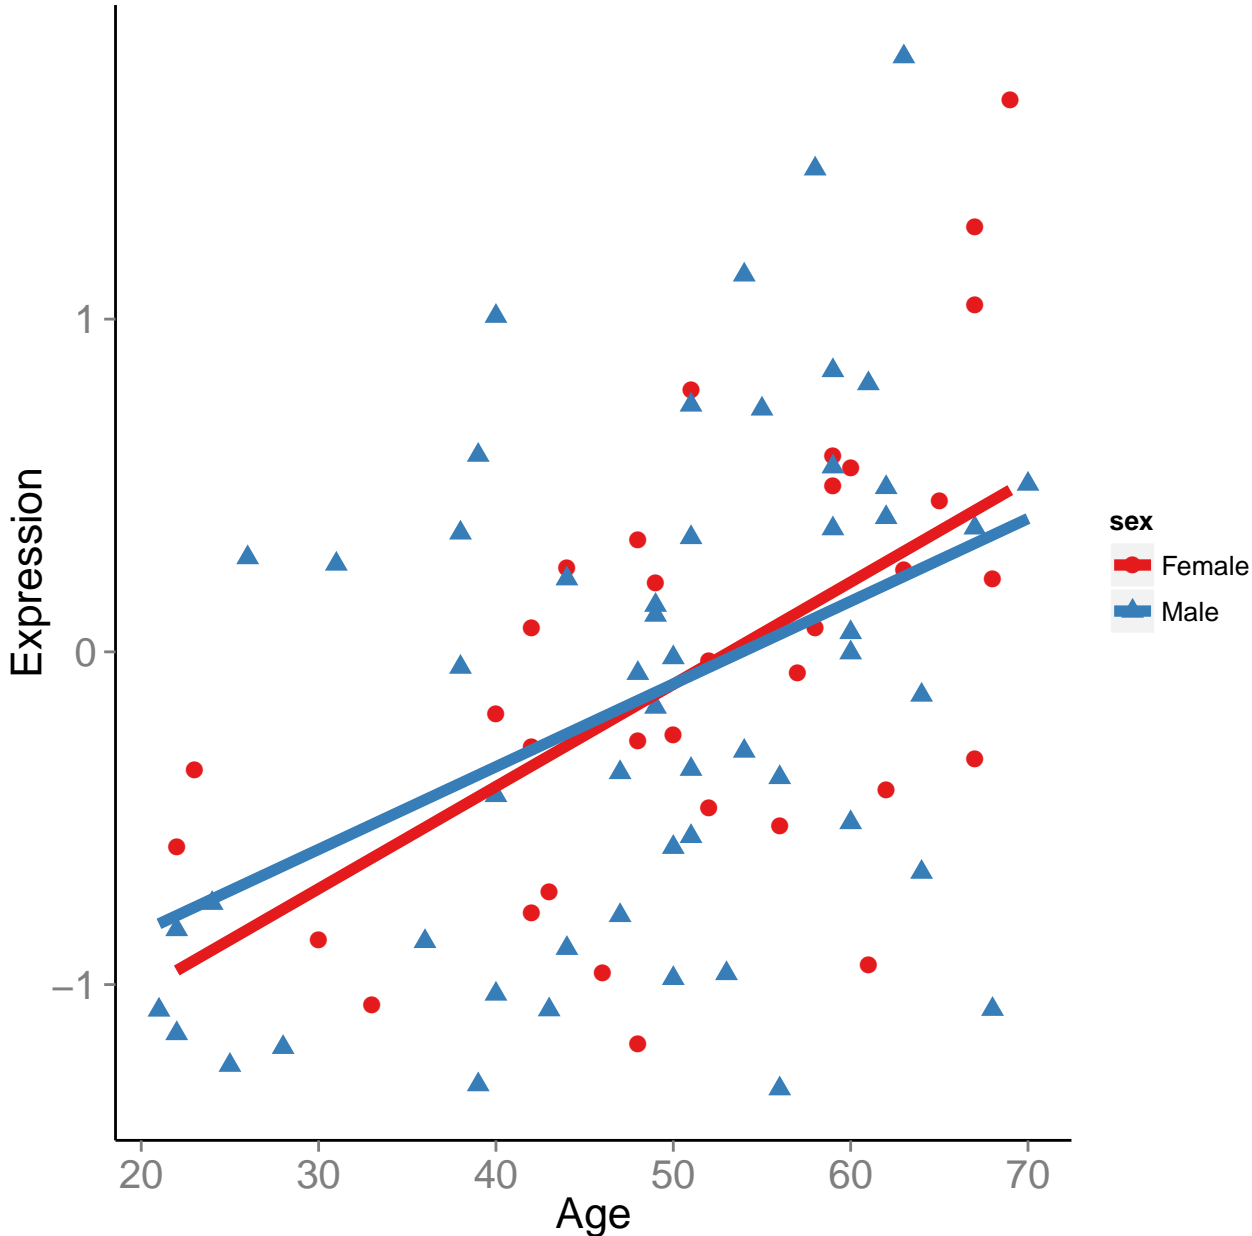

Nerve: MLIP Pearson-R=-0.47 Pval=2.97E-06

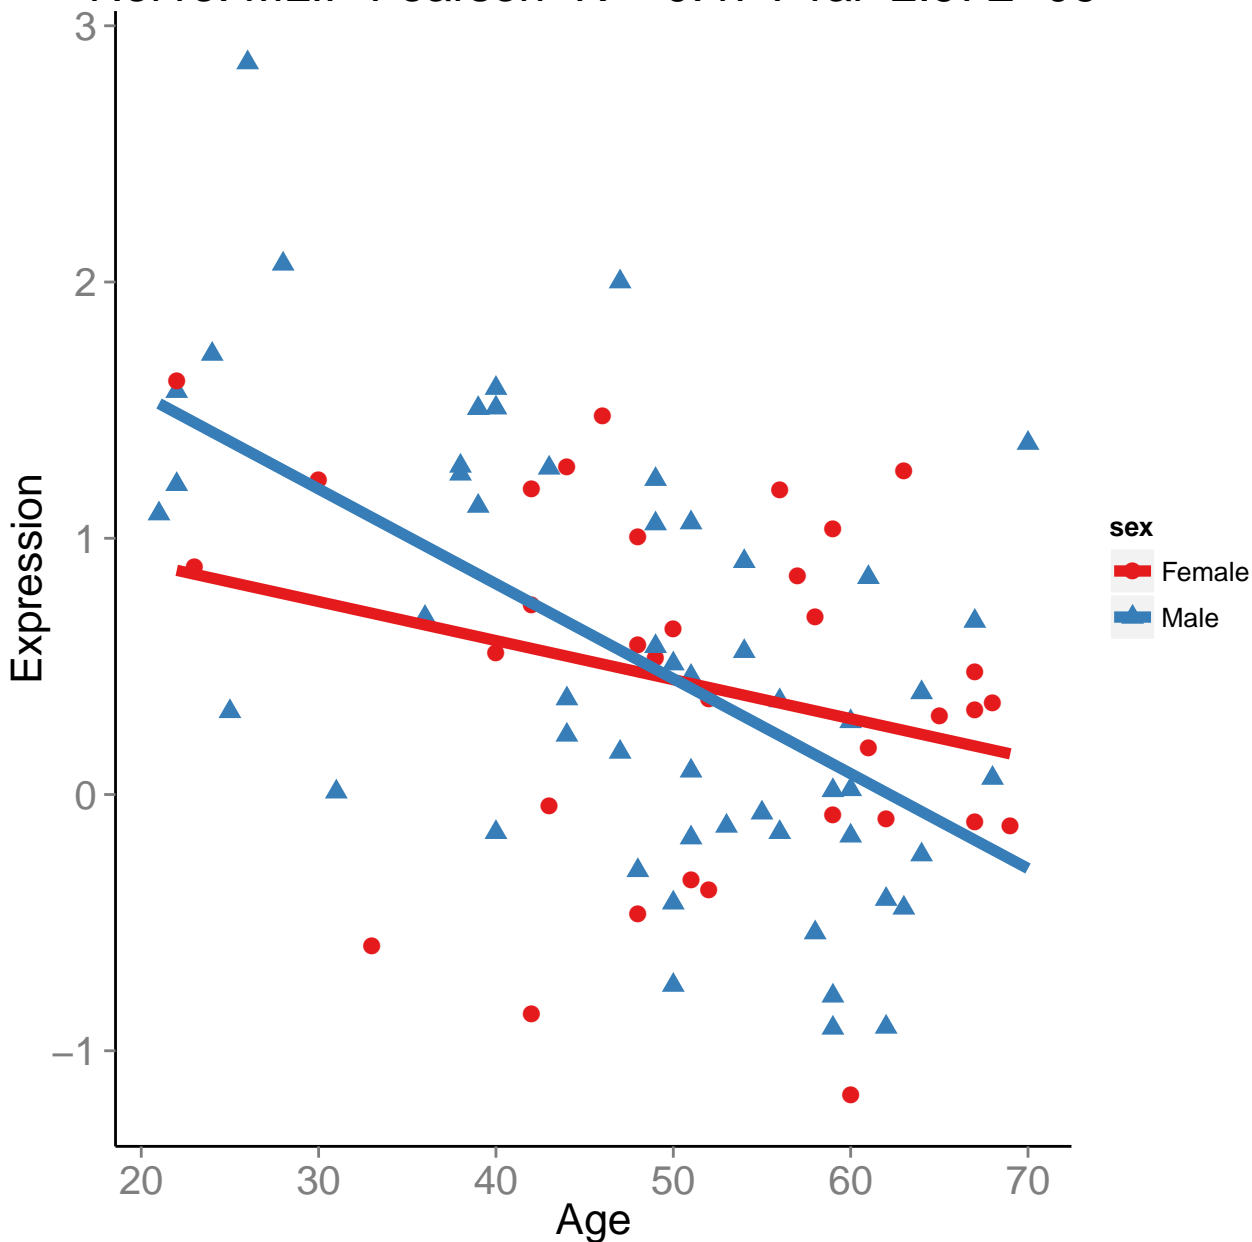

Nerve: KCNMB4 Pearson-R=0.47 Pval=3.09E-06

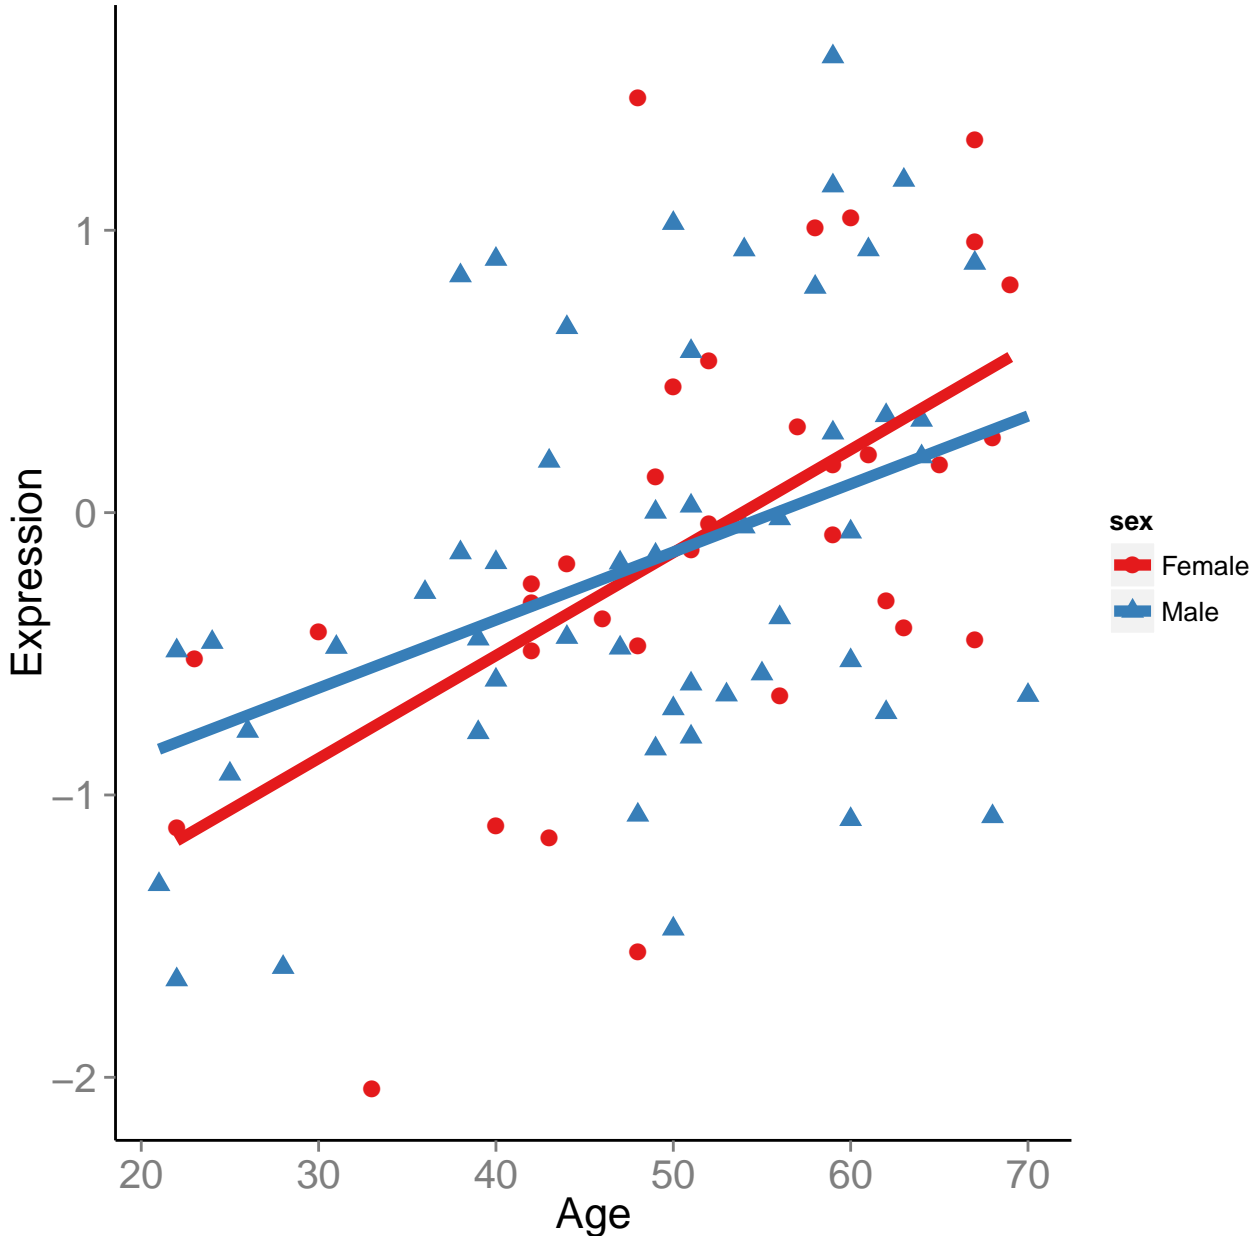

Nerve: MGLL Pearson-R=-0.47 Pval=3.18E-06

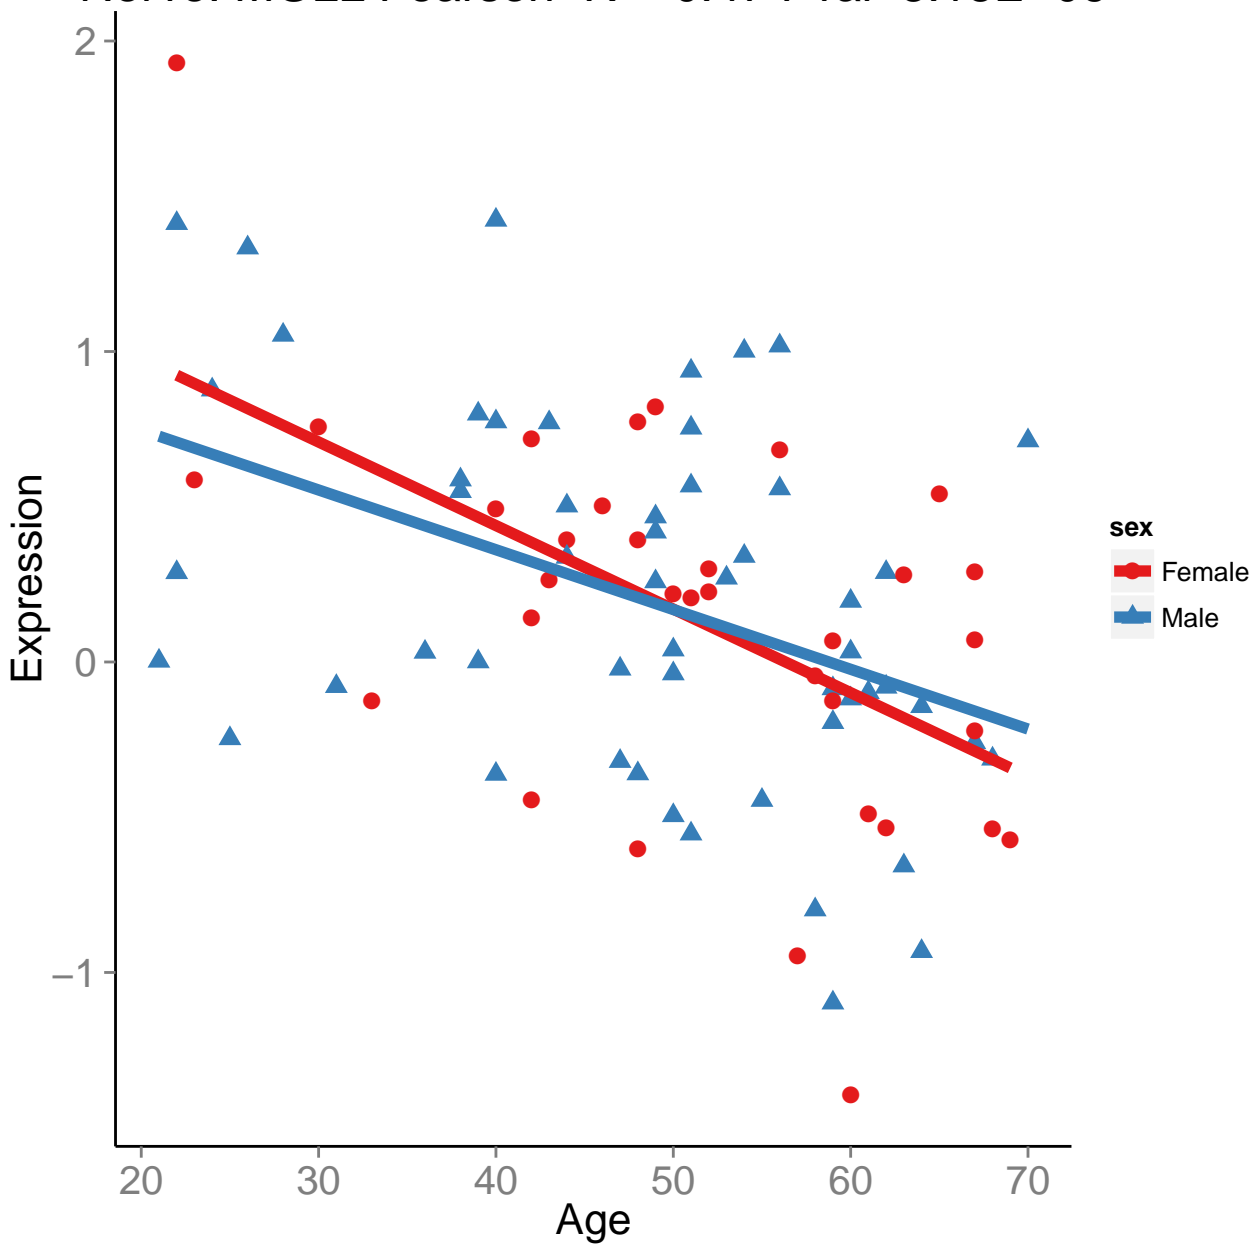

Nerve: TMEM189 Pearson-R=-0.47 Pval=3.18E-06

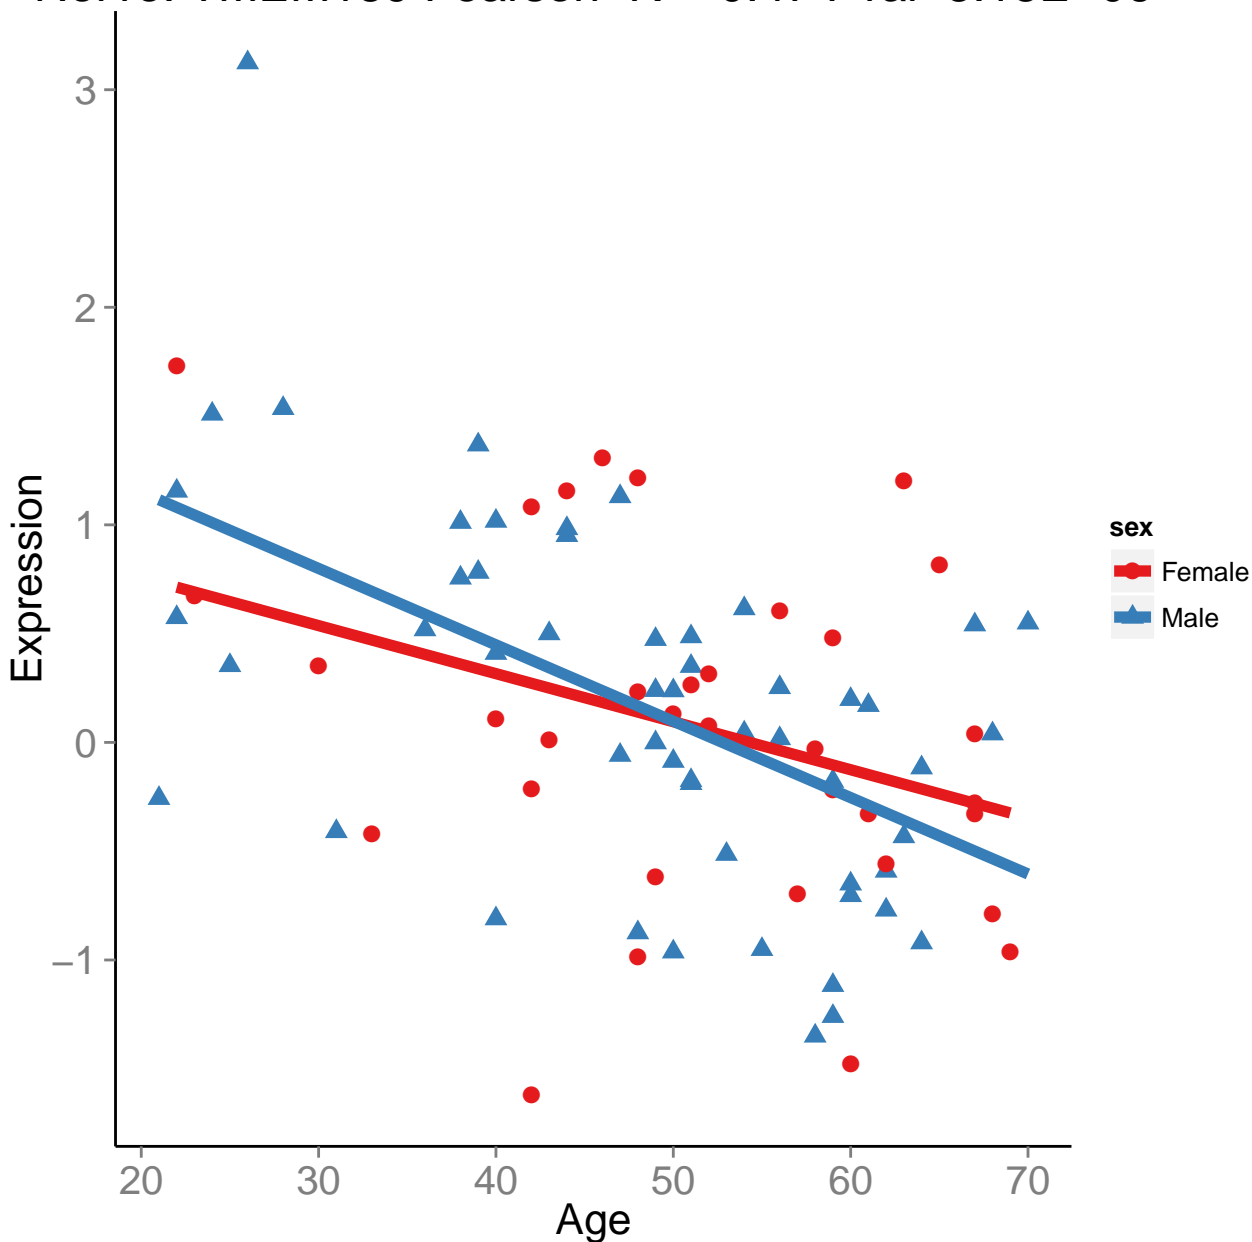



Nerve: CNTN1 Pearson-R=0.47 Pval=3.46E-06

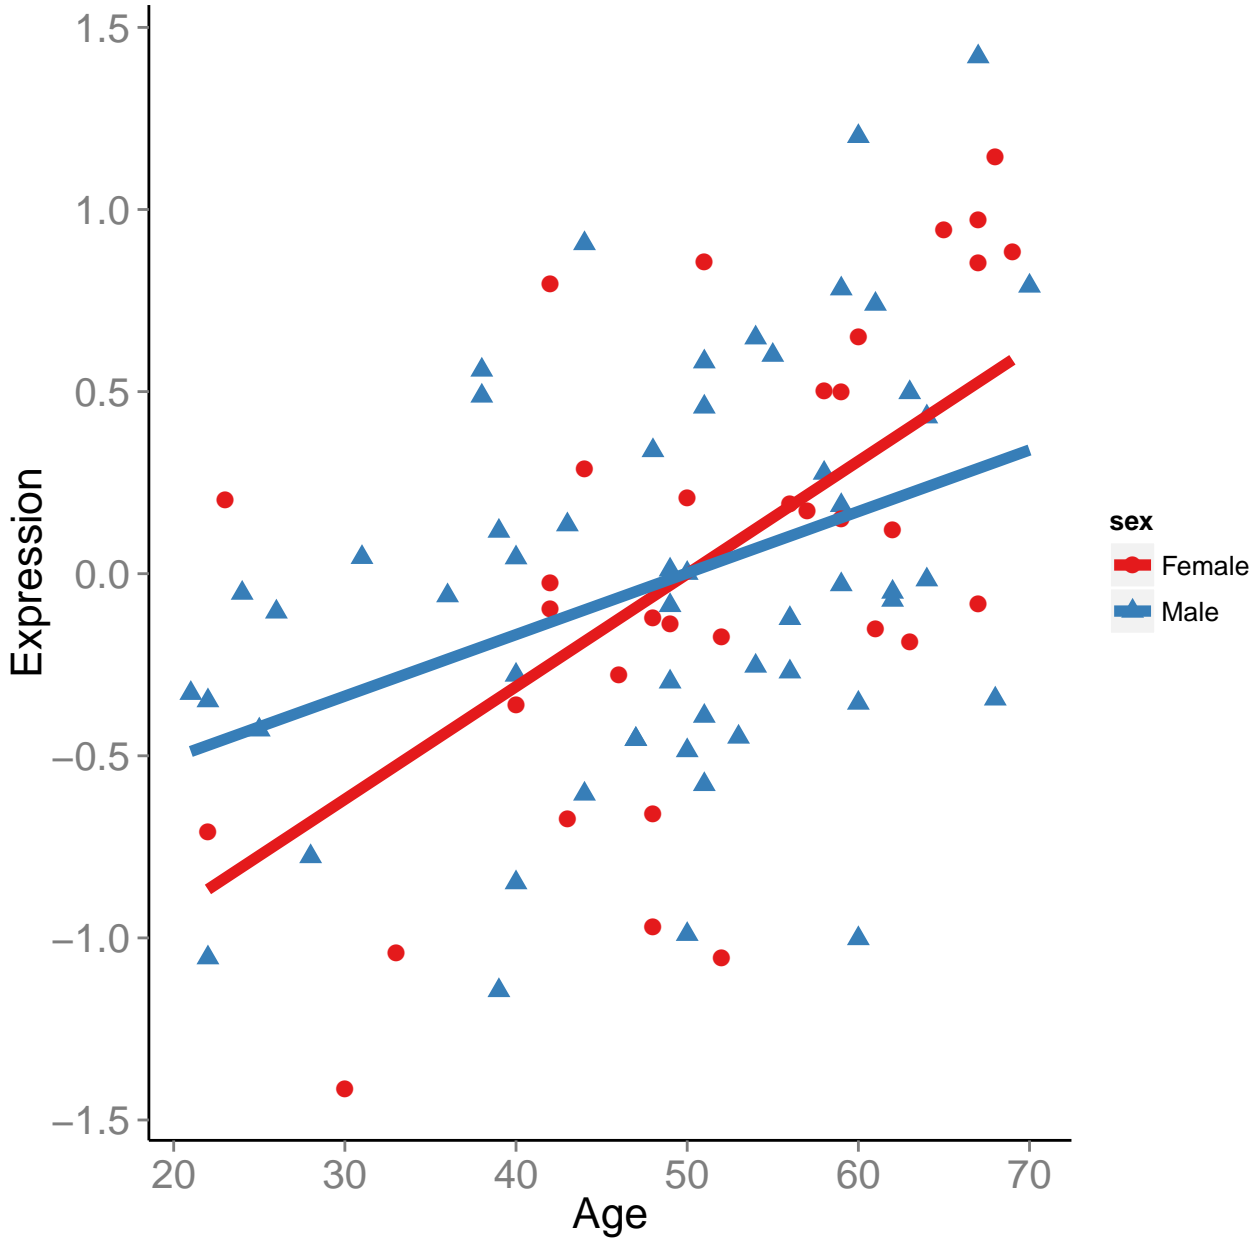

Nerve: TMEM132C Pearson-R=-0.47 Pval=3.65E-06

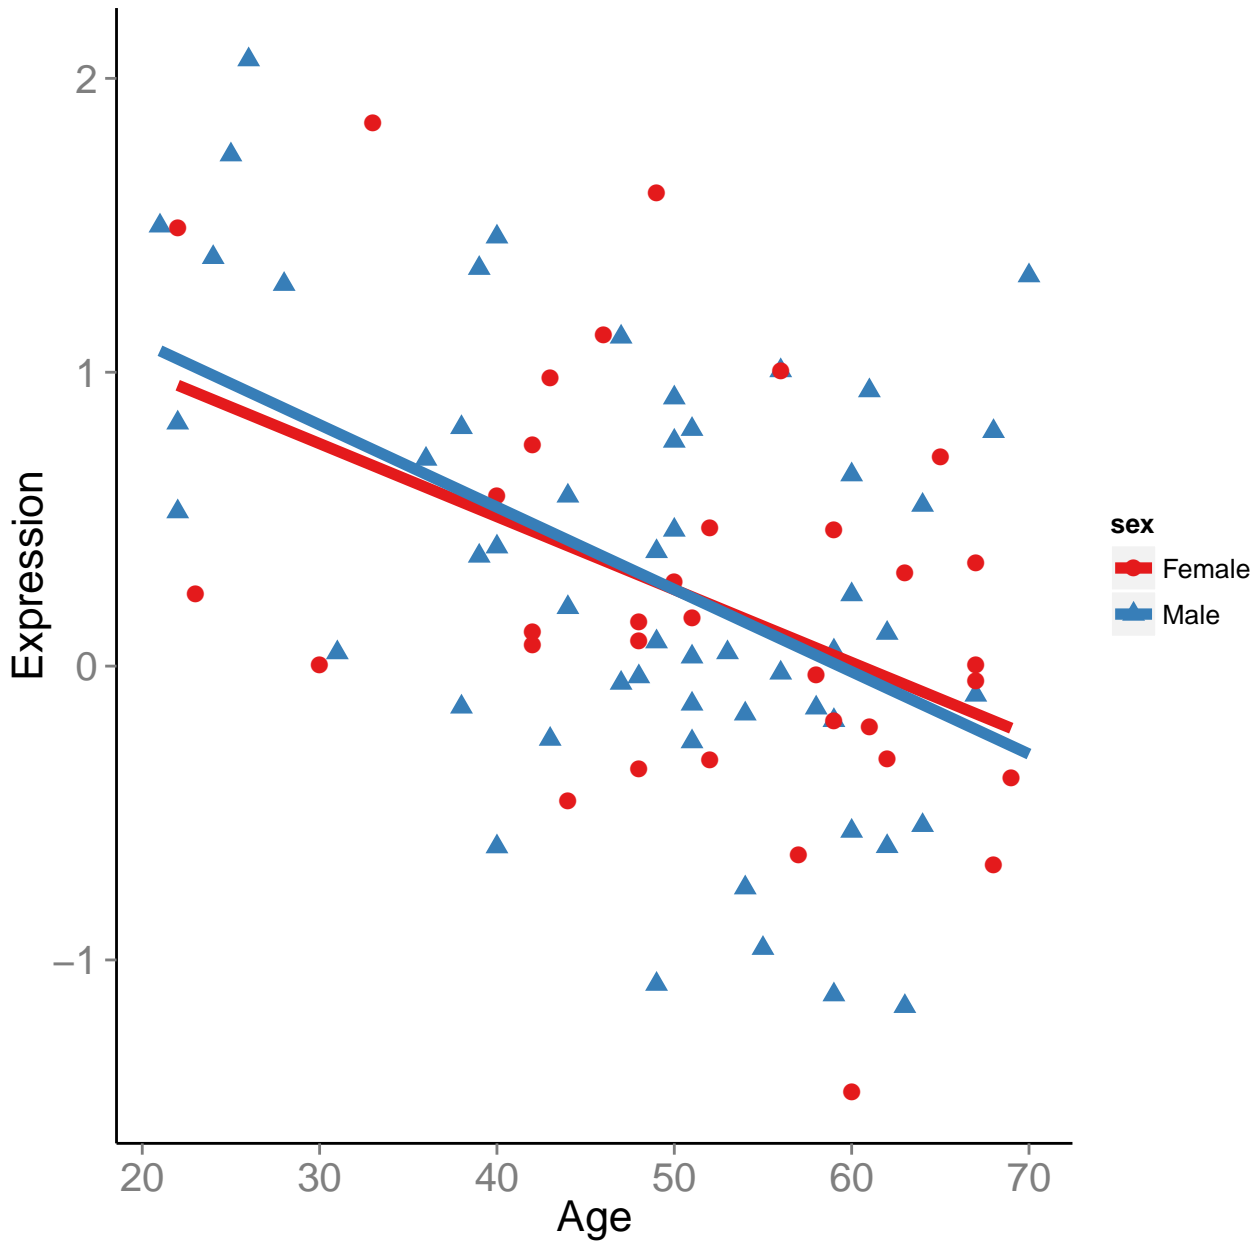

Nerve: BIRC3 Pearson-R=0.47 Pval=3.78E-06

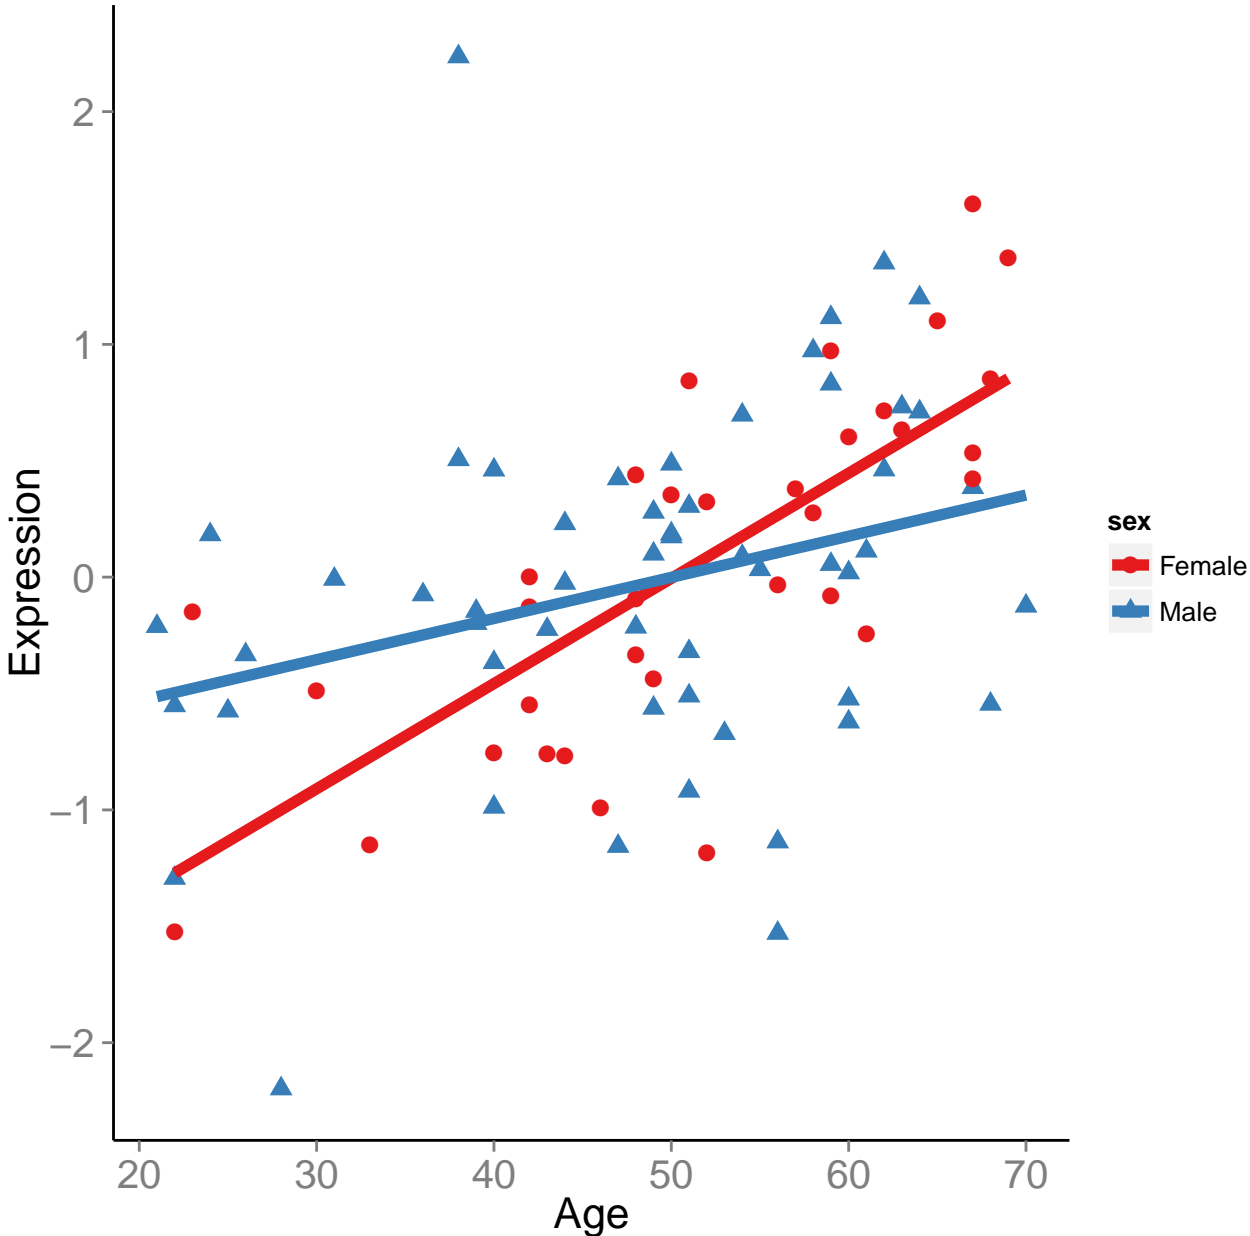

Nerve: CERS6 Pearson-R=0.47 Pval=3.93E-06

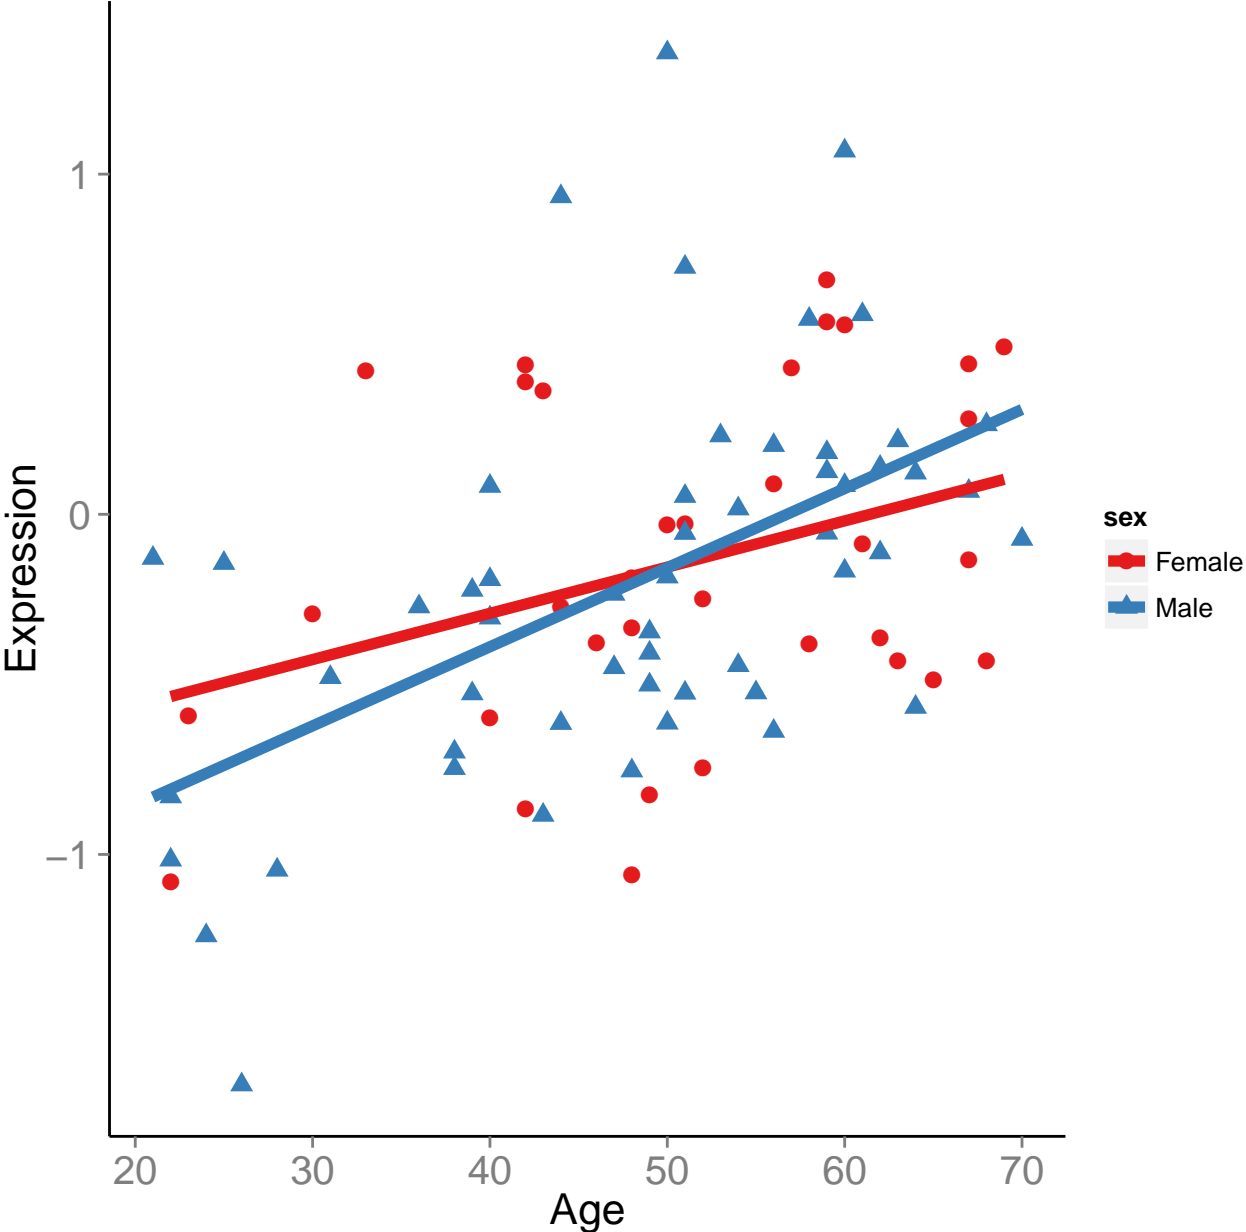

Nerve: ARSE Pearson-R=0.47 Pval=4.02E-06

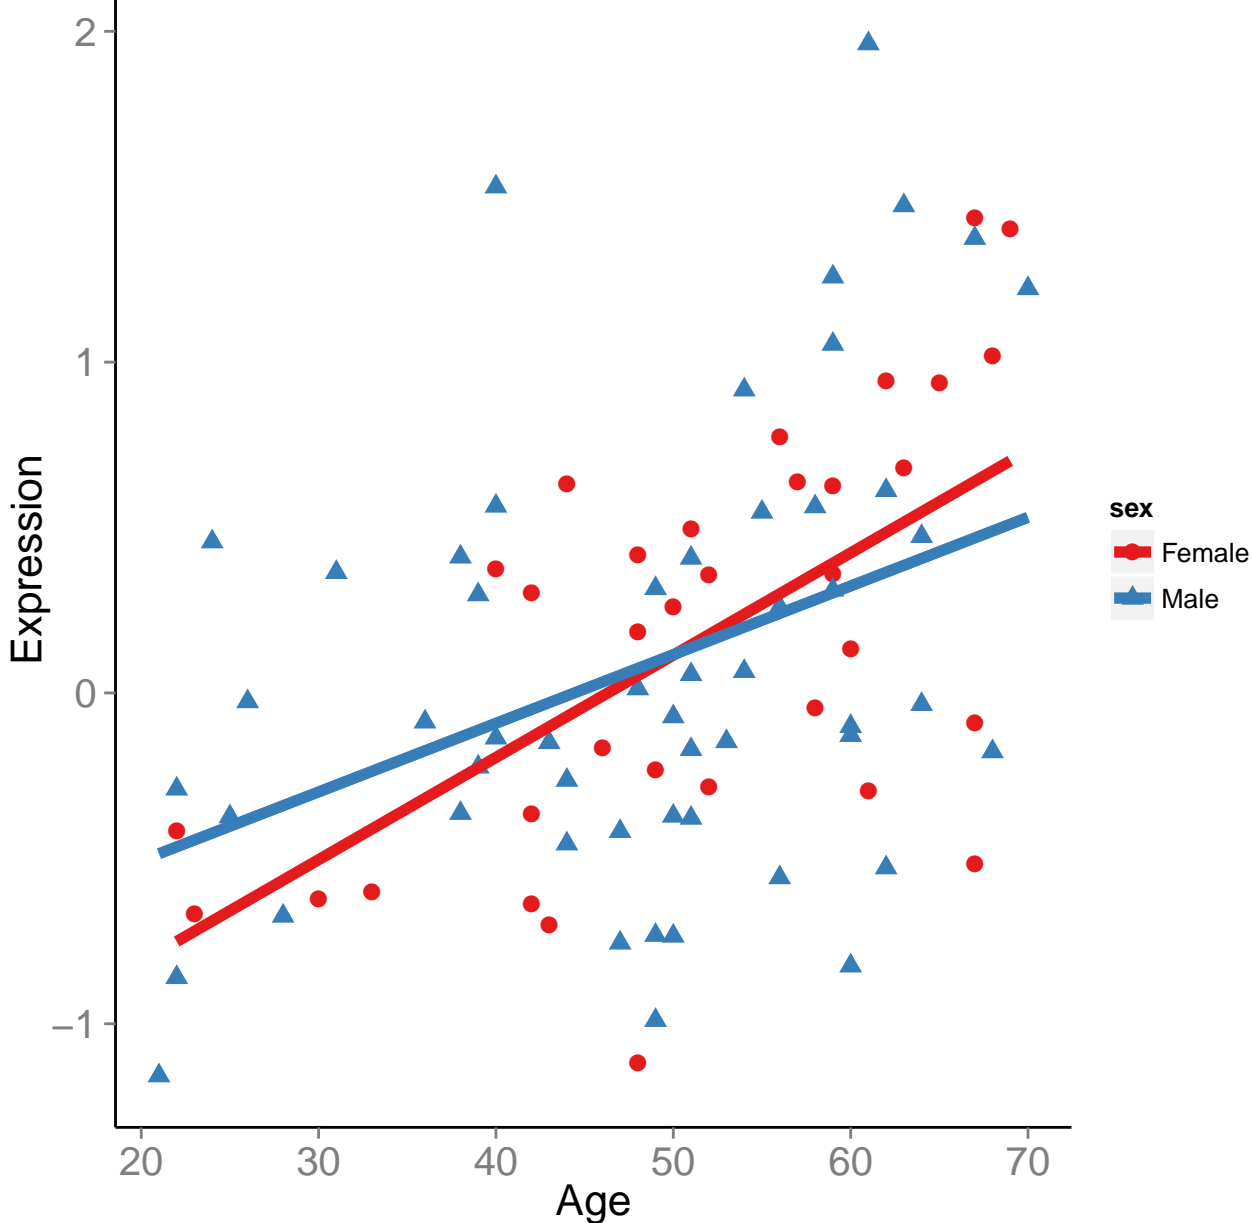

Nerve: TMOD2 Pearson-R=0.47 Pval=3.88E-06

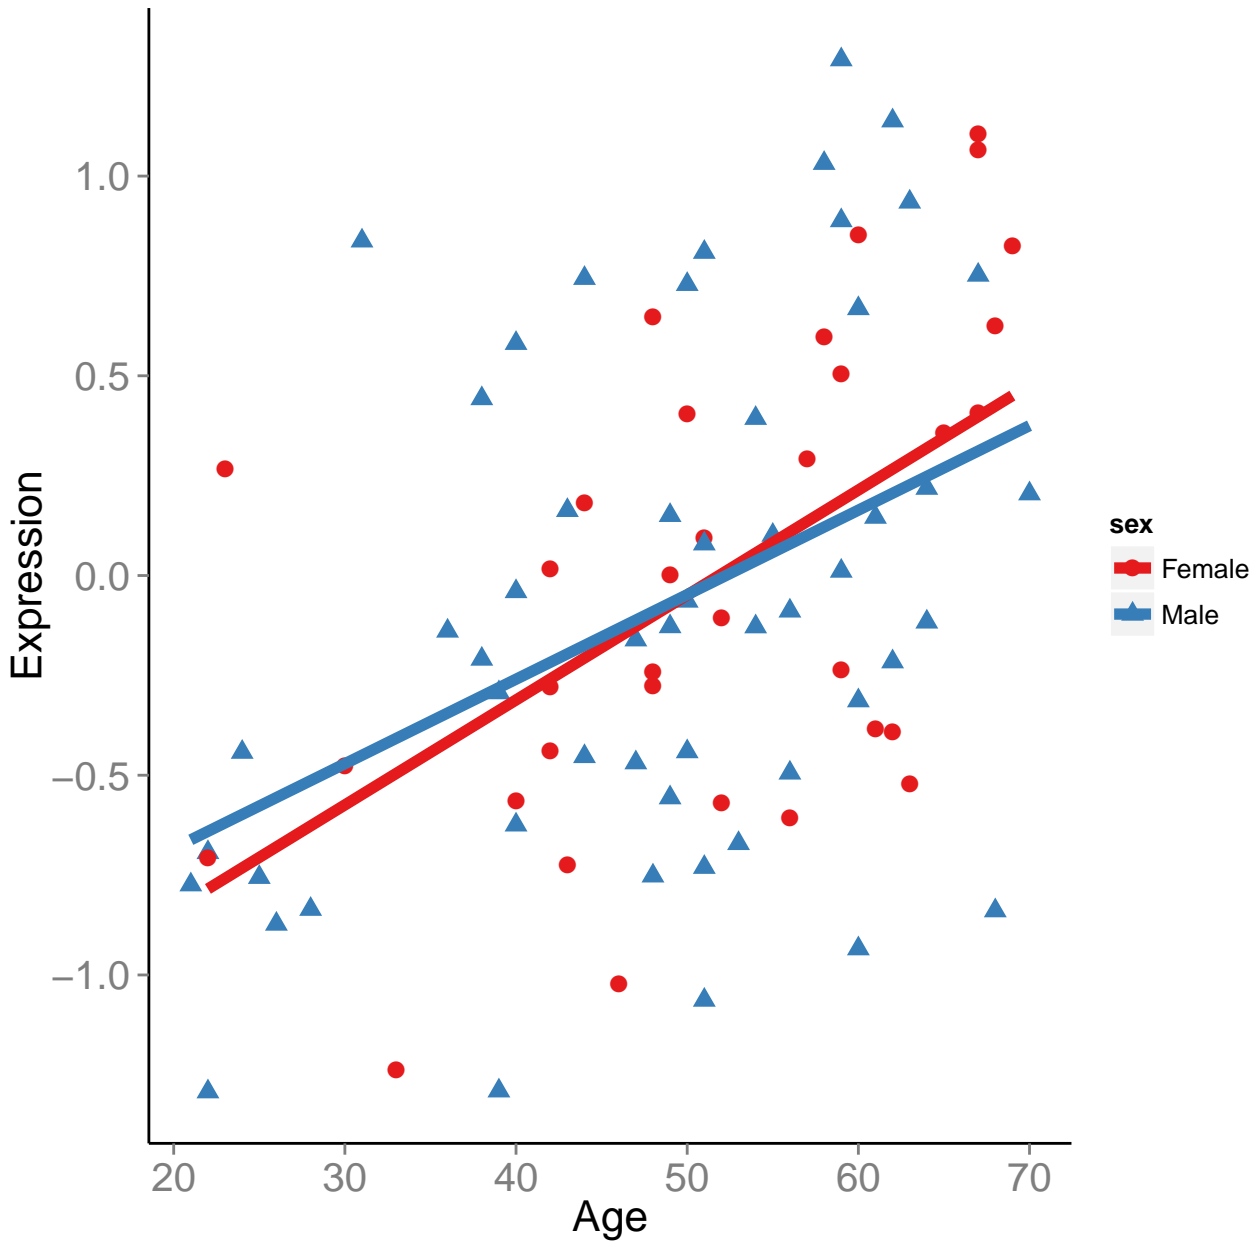

Nerve: C5orf30 Pearson-R=-0.47 Pval=3.98E-06

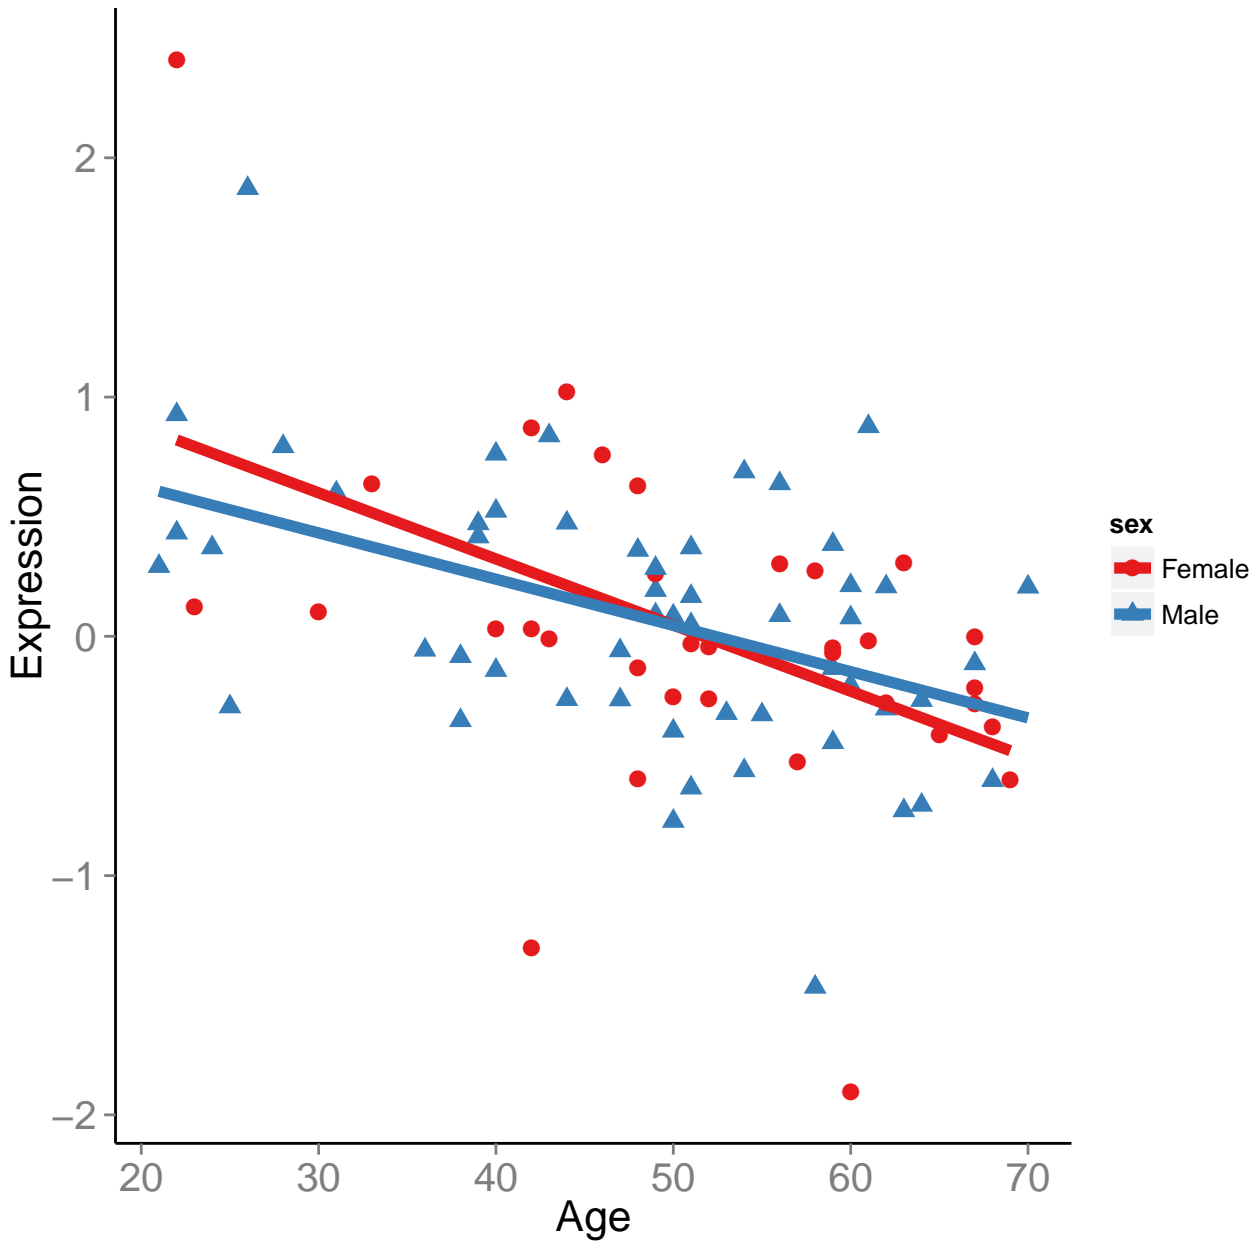

Nerve: LEPREL1 Pearson-R=-0.47 Pval=3.89E-06

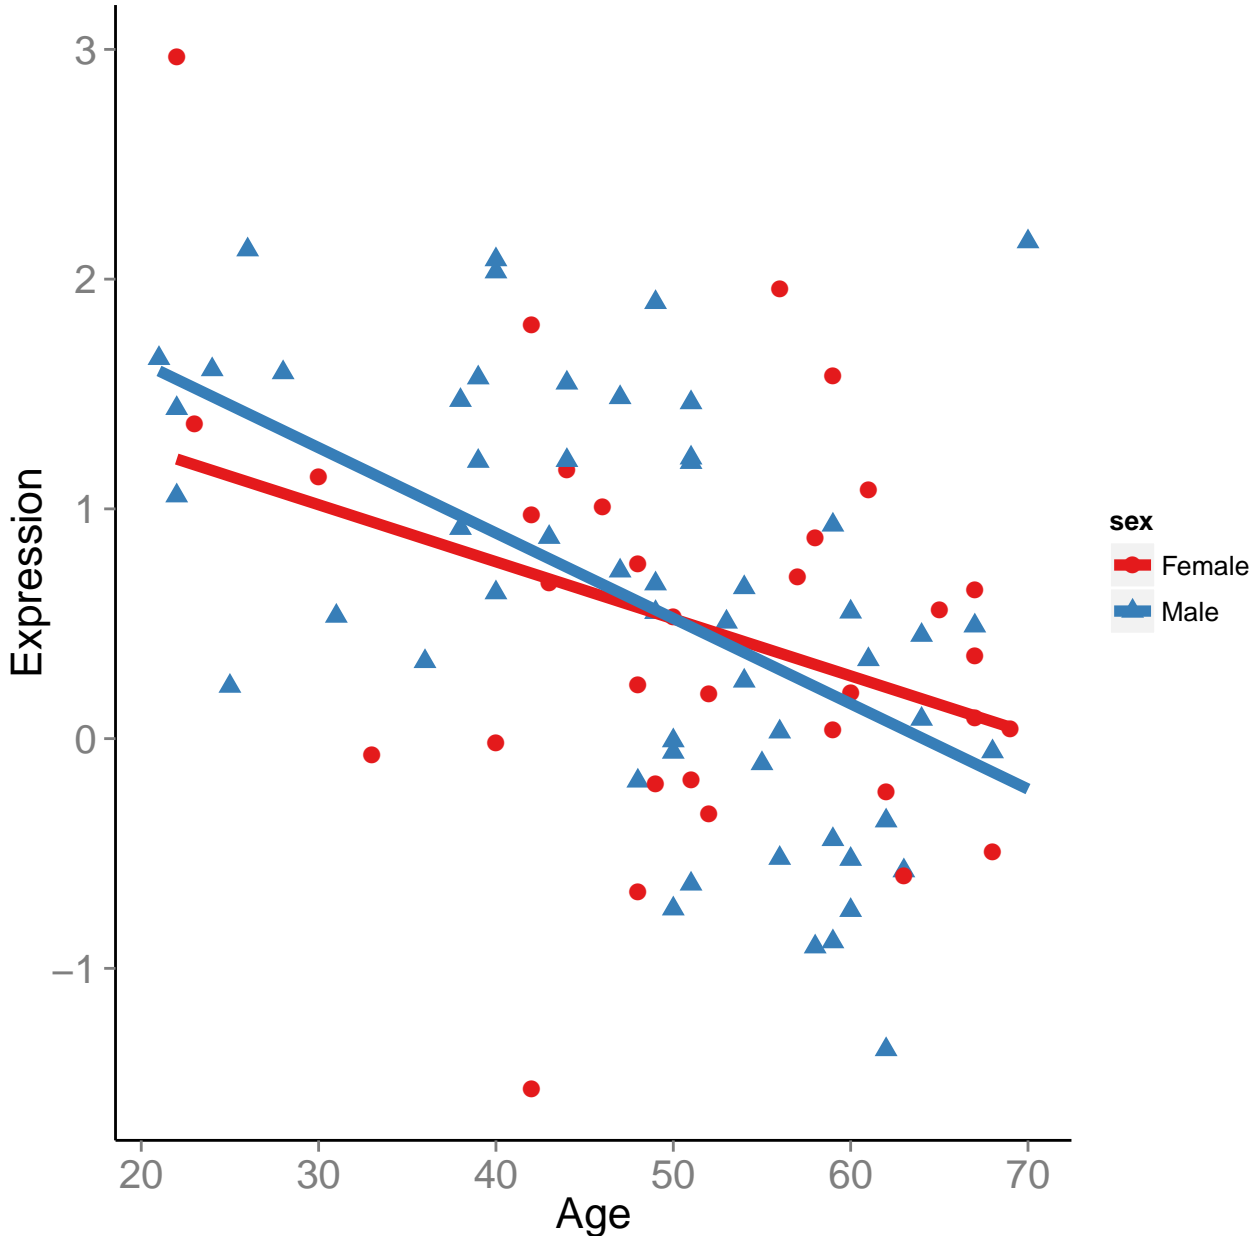



Nerve: INTS10 Pearson-R=0.47 Pval=4.38E-06

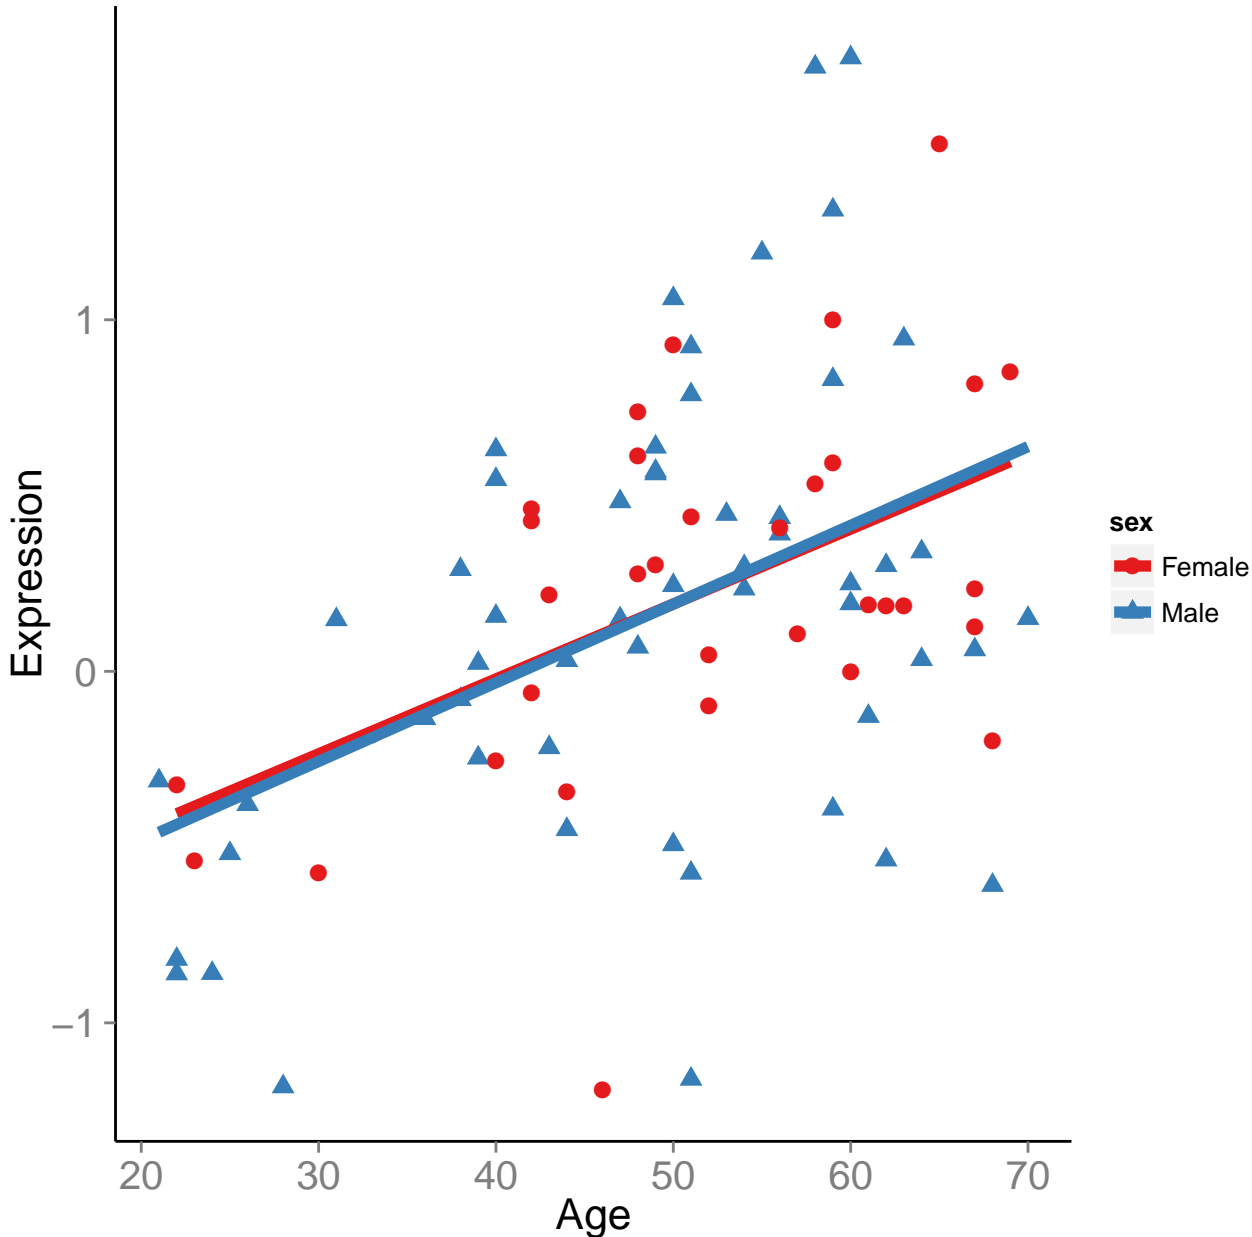

Nerve: SH3RF1 Pearson-R=0.47 Pval=4.67E-06

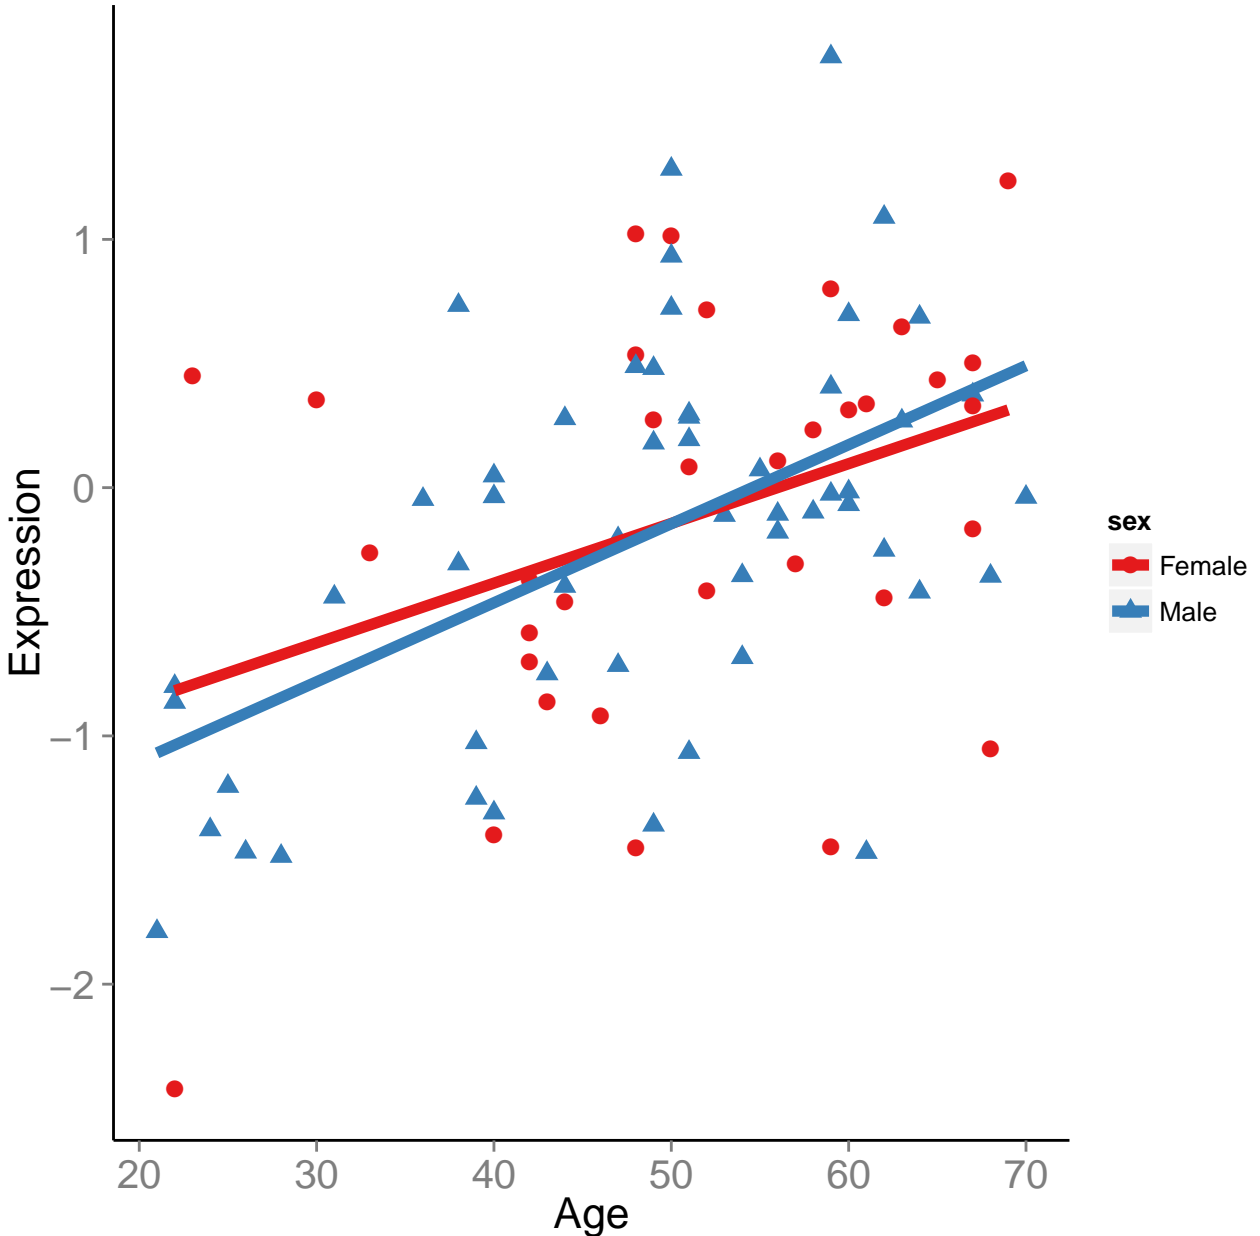

Nerve: CTA-363E6.7 Pearson-R=-0.47 Pval=4.89E-06

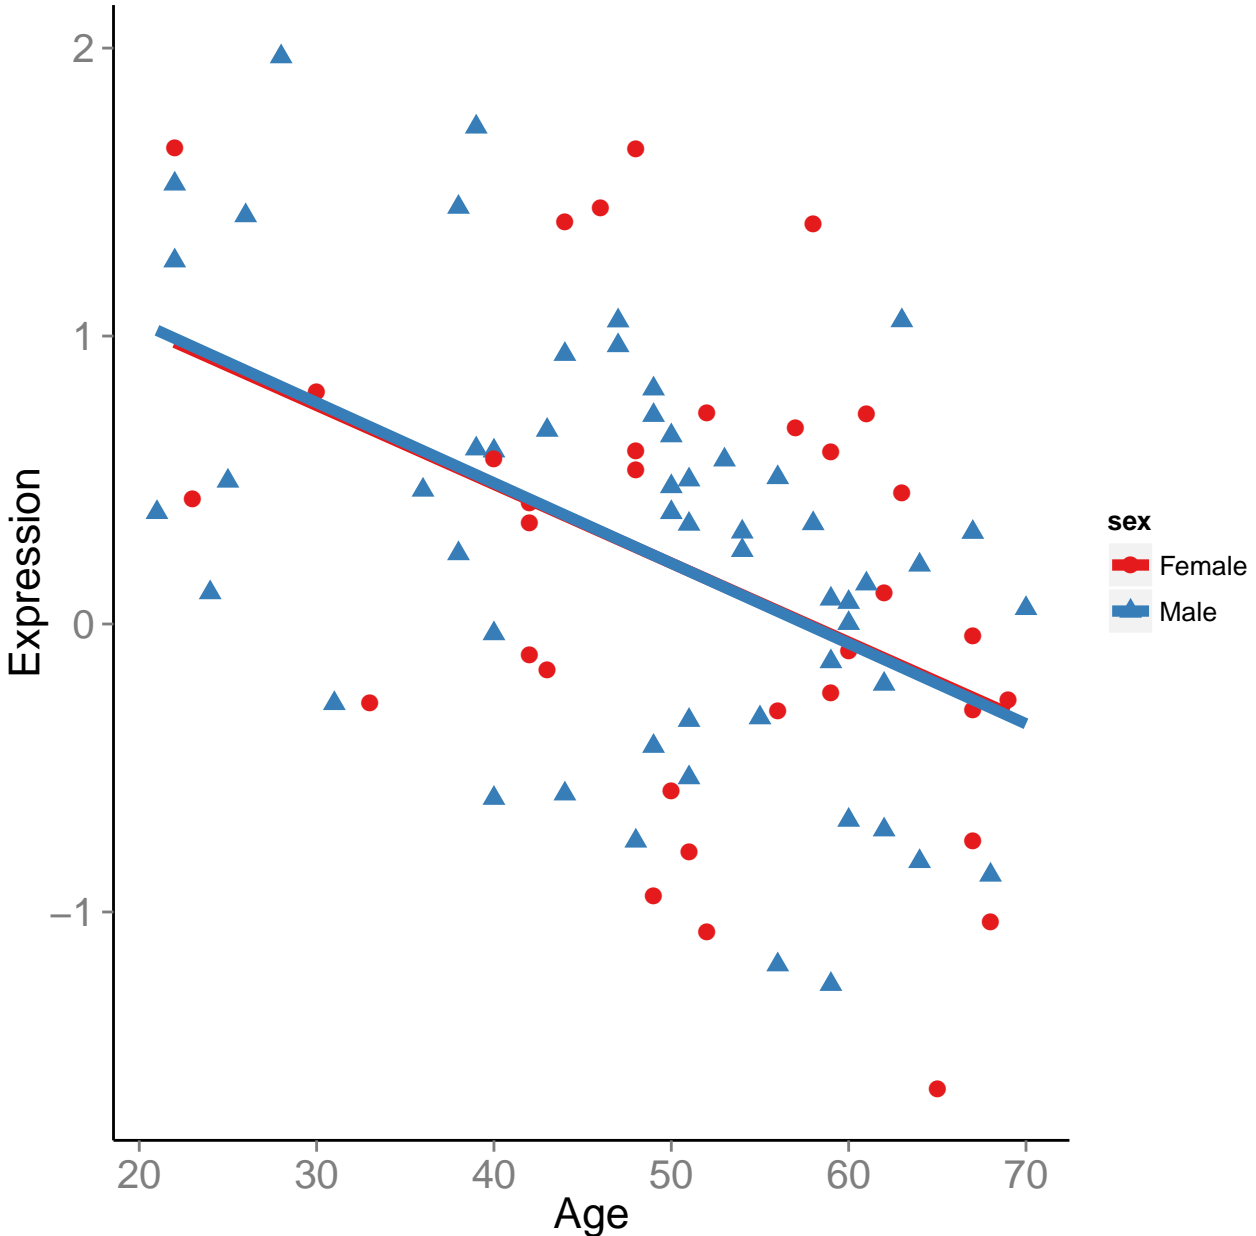

Nerve: CDC42EP5 Pearson-R=0.46 Pval=5.84E-06

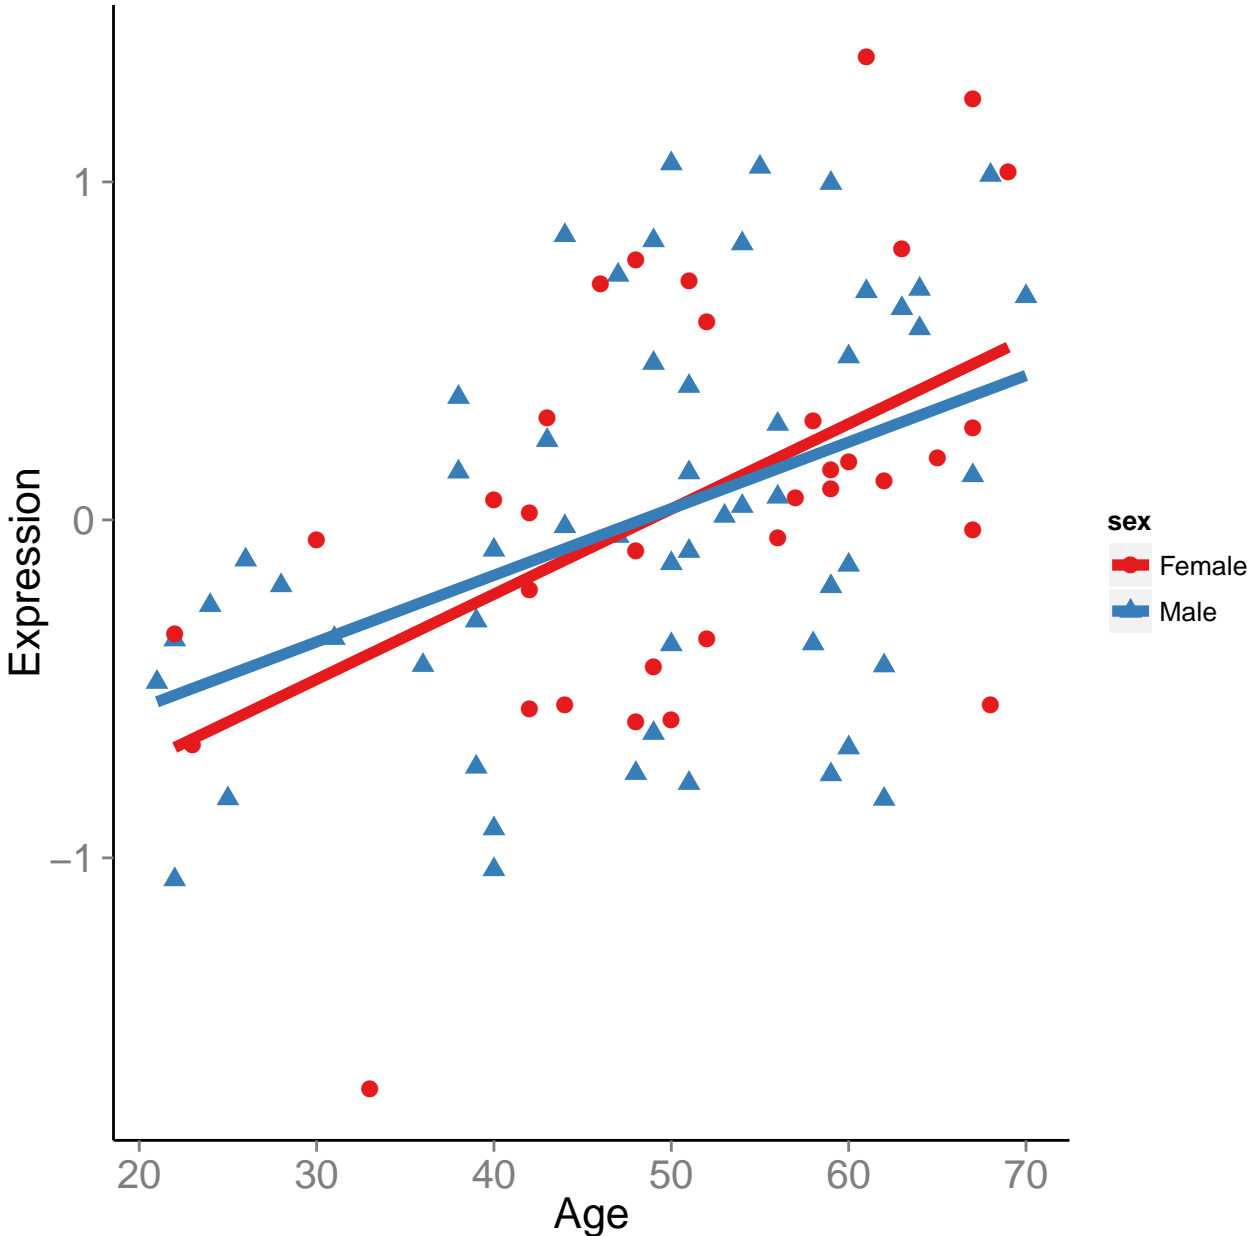

Nerve: RP11-839D17.2 Pearson-R=0.46 Pval=5.38E-06

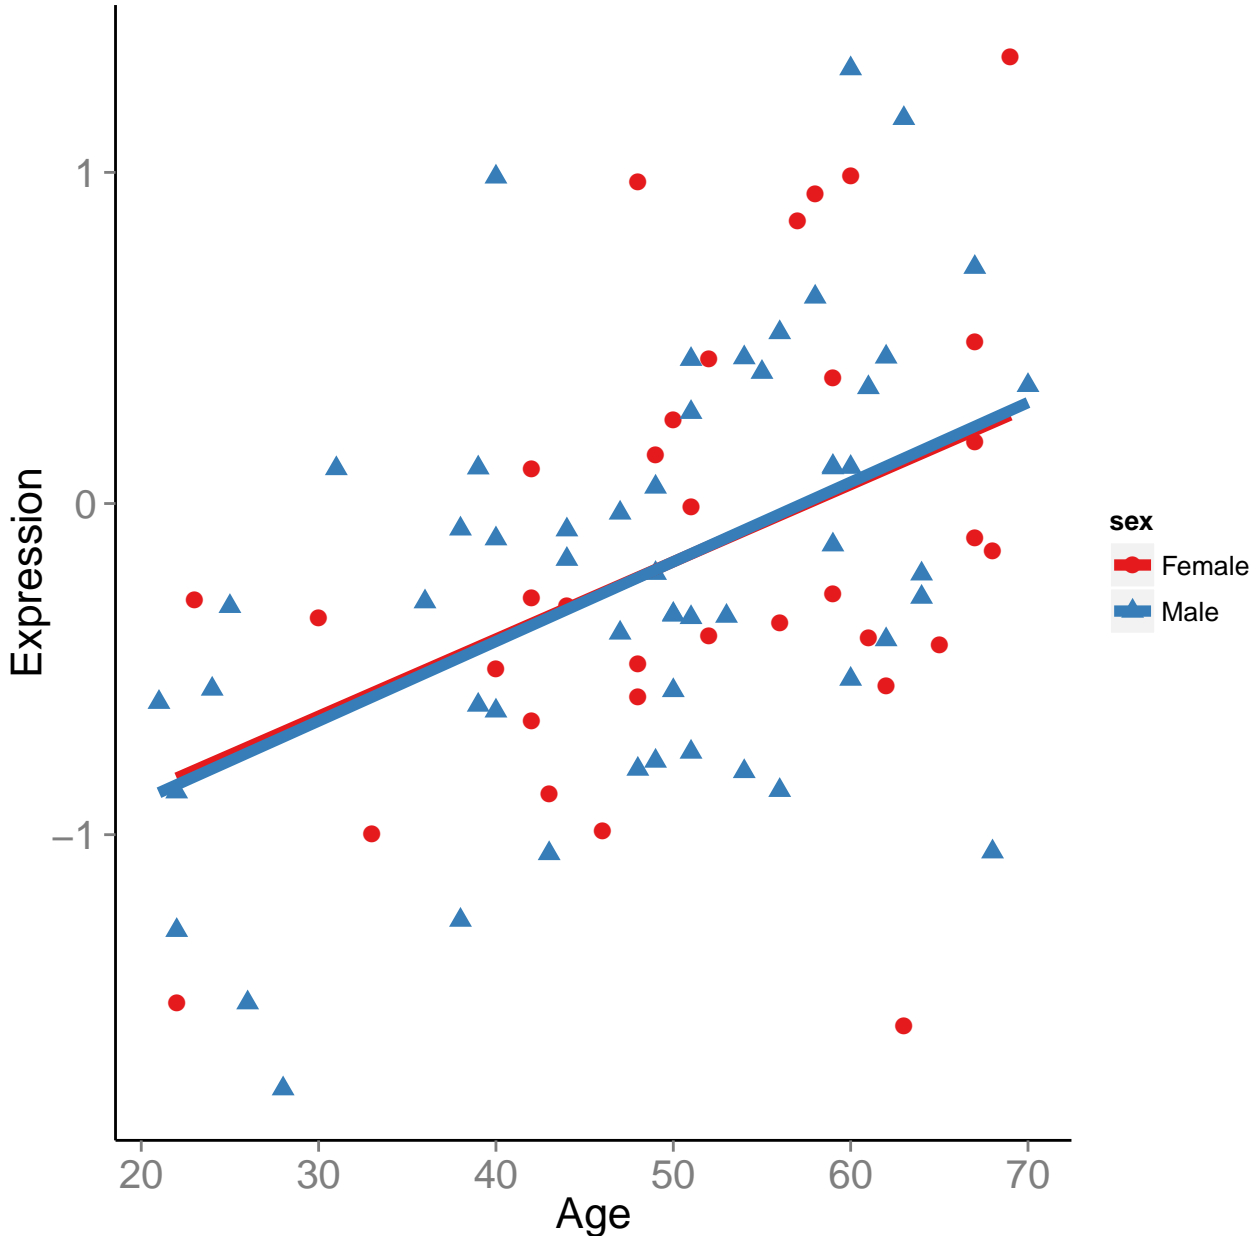

Nerve: PALMD Pearson-R=-0.46 Pval=5.15E-06

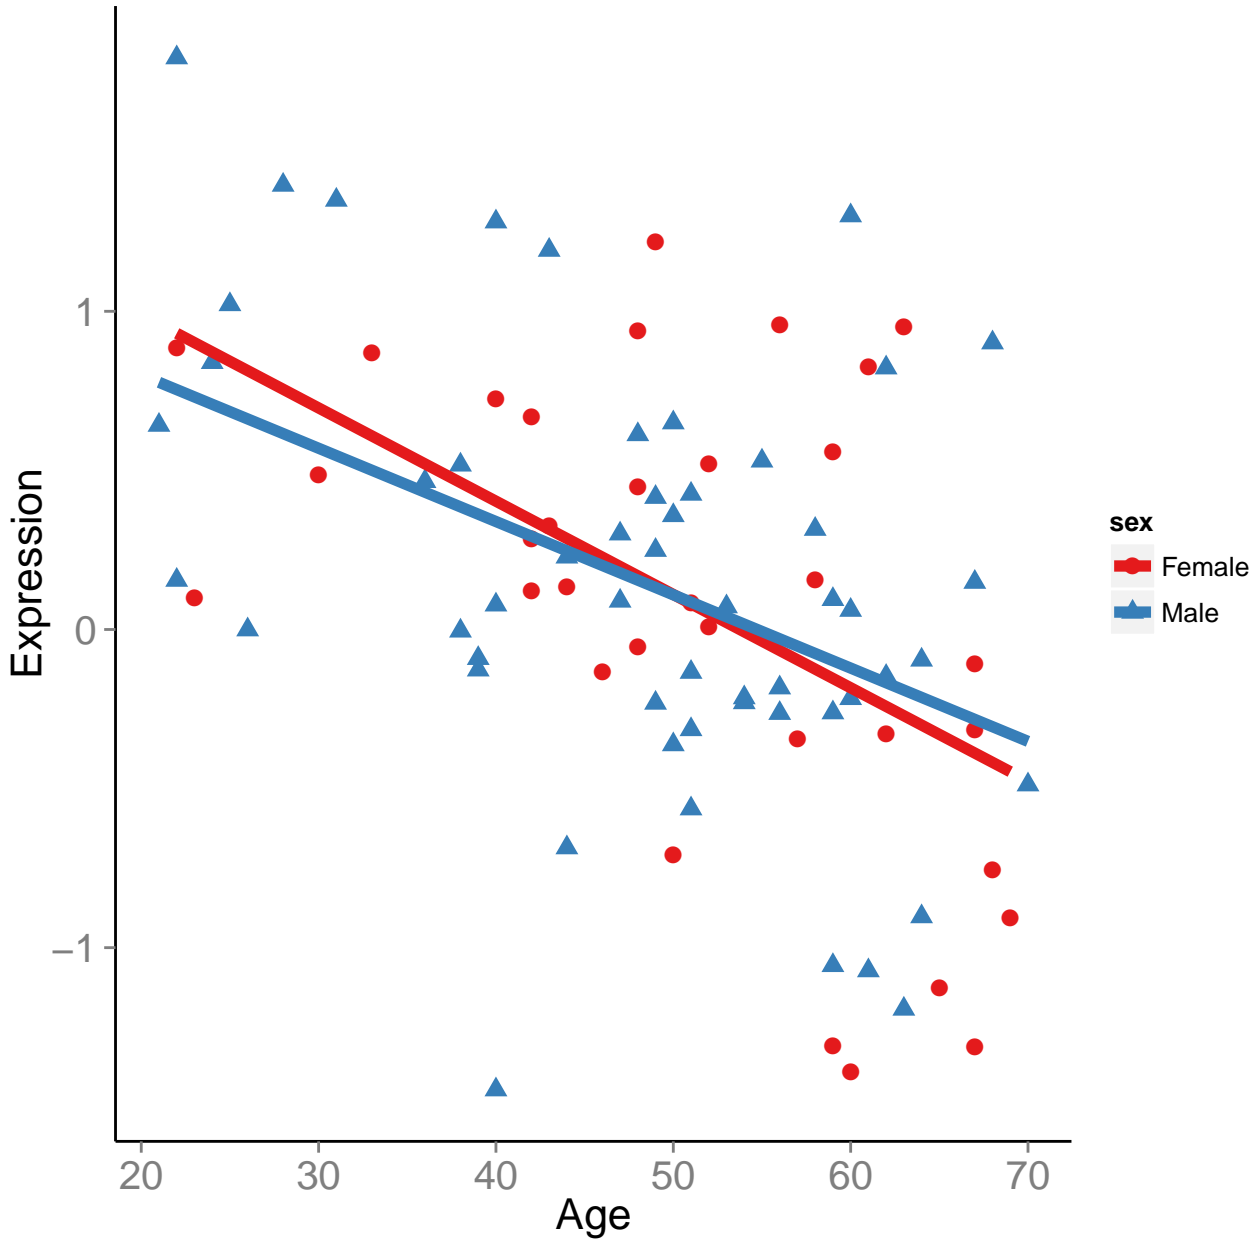

Nerve: RP11-381K20.2 Pearson-R=0.46 Pval=5.74E-06

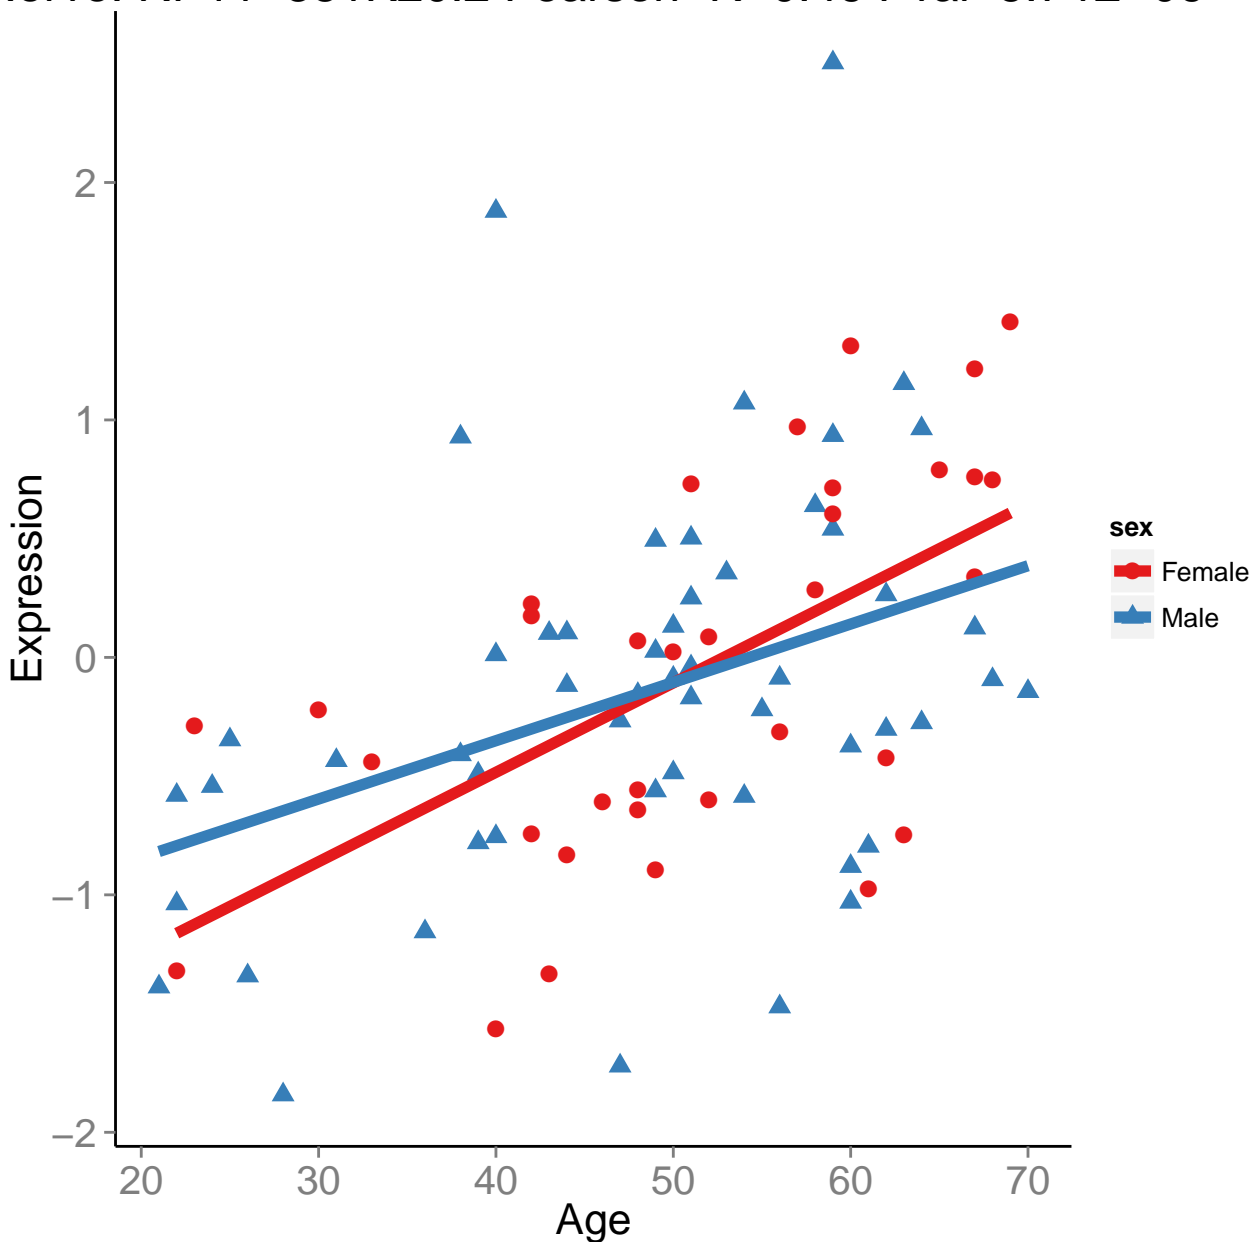

Nerve: TRAK1 Pearson-R=-0.46 Pval=5.58E-06

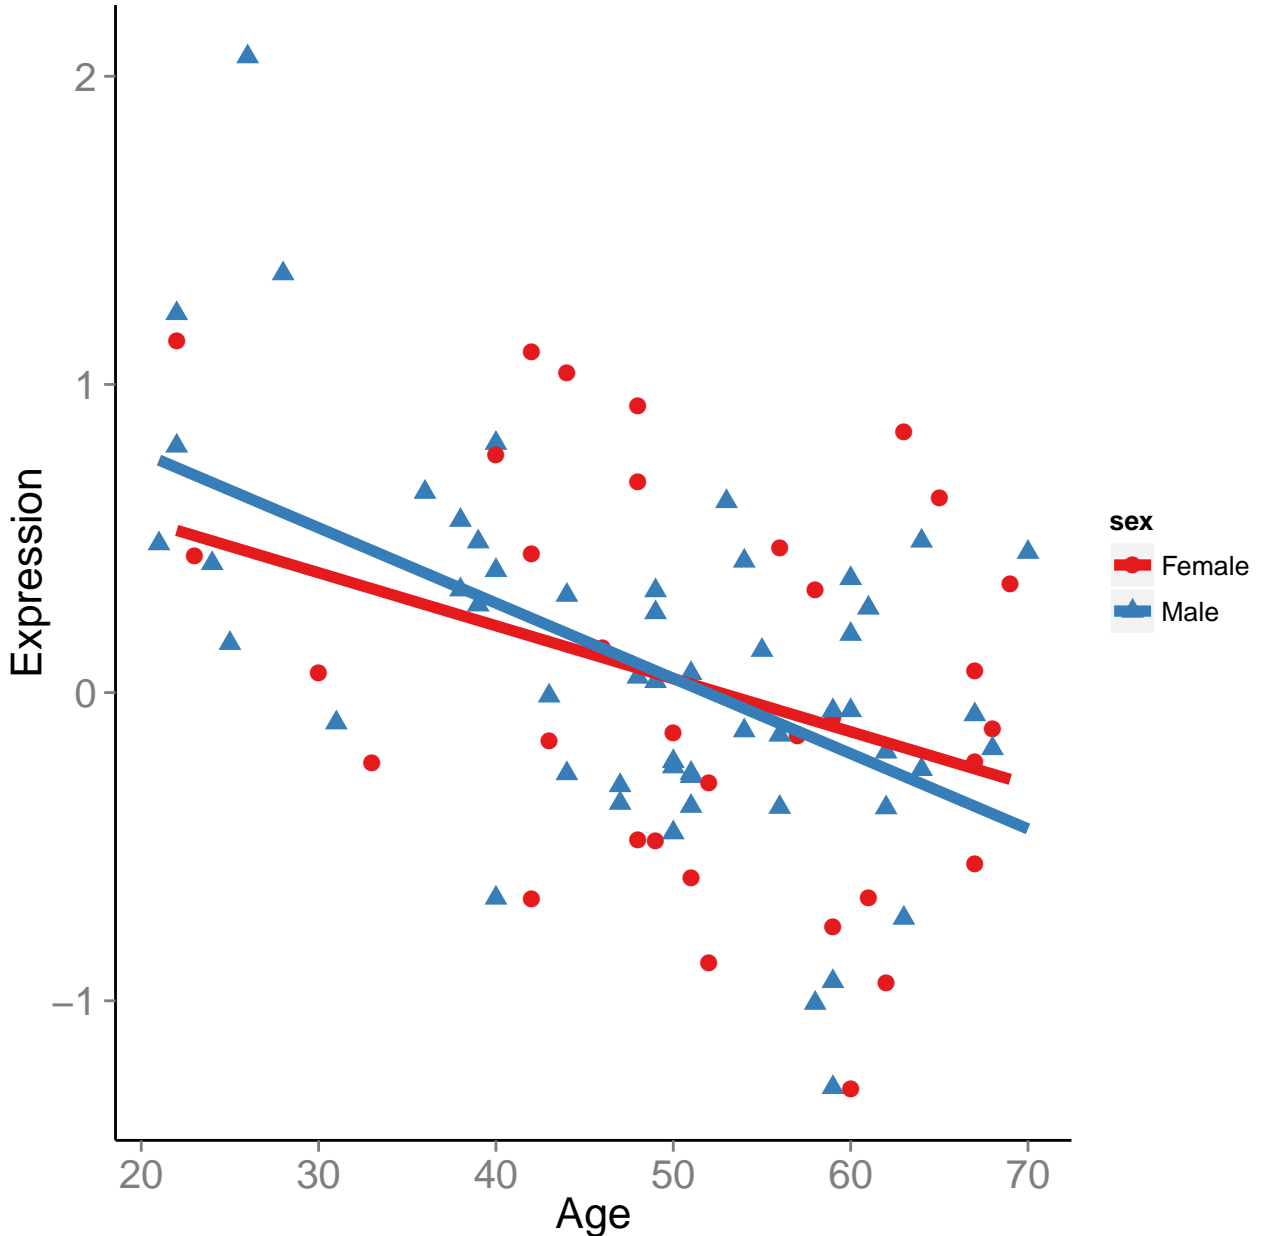



Nerve: NTNG1 Pearson-R=0.46 Pval=5.41E-06

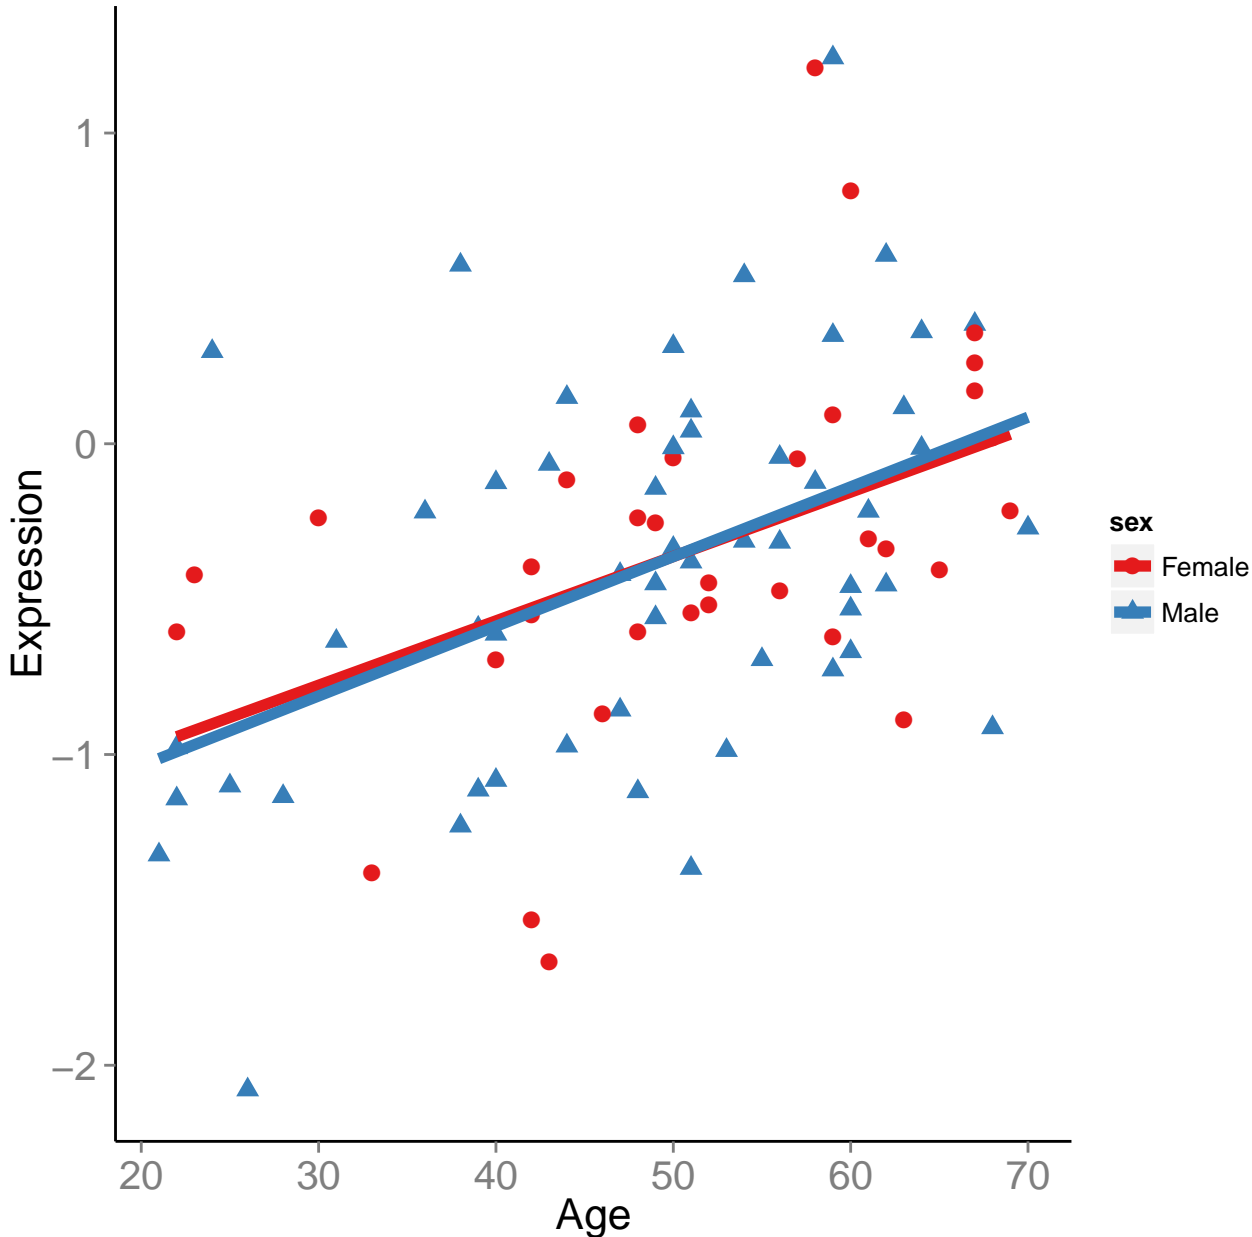

Nerve: KCTD1 Pearson-R=0.46 Pval=5.78E-06

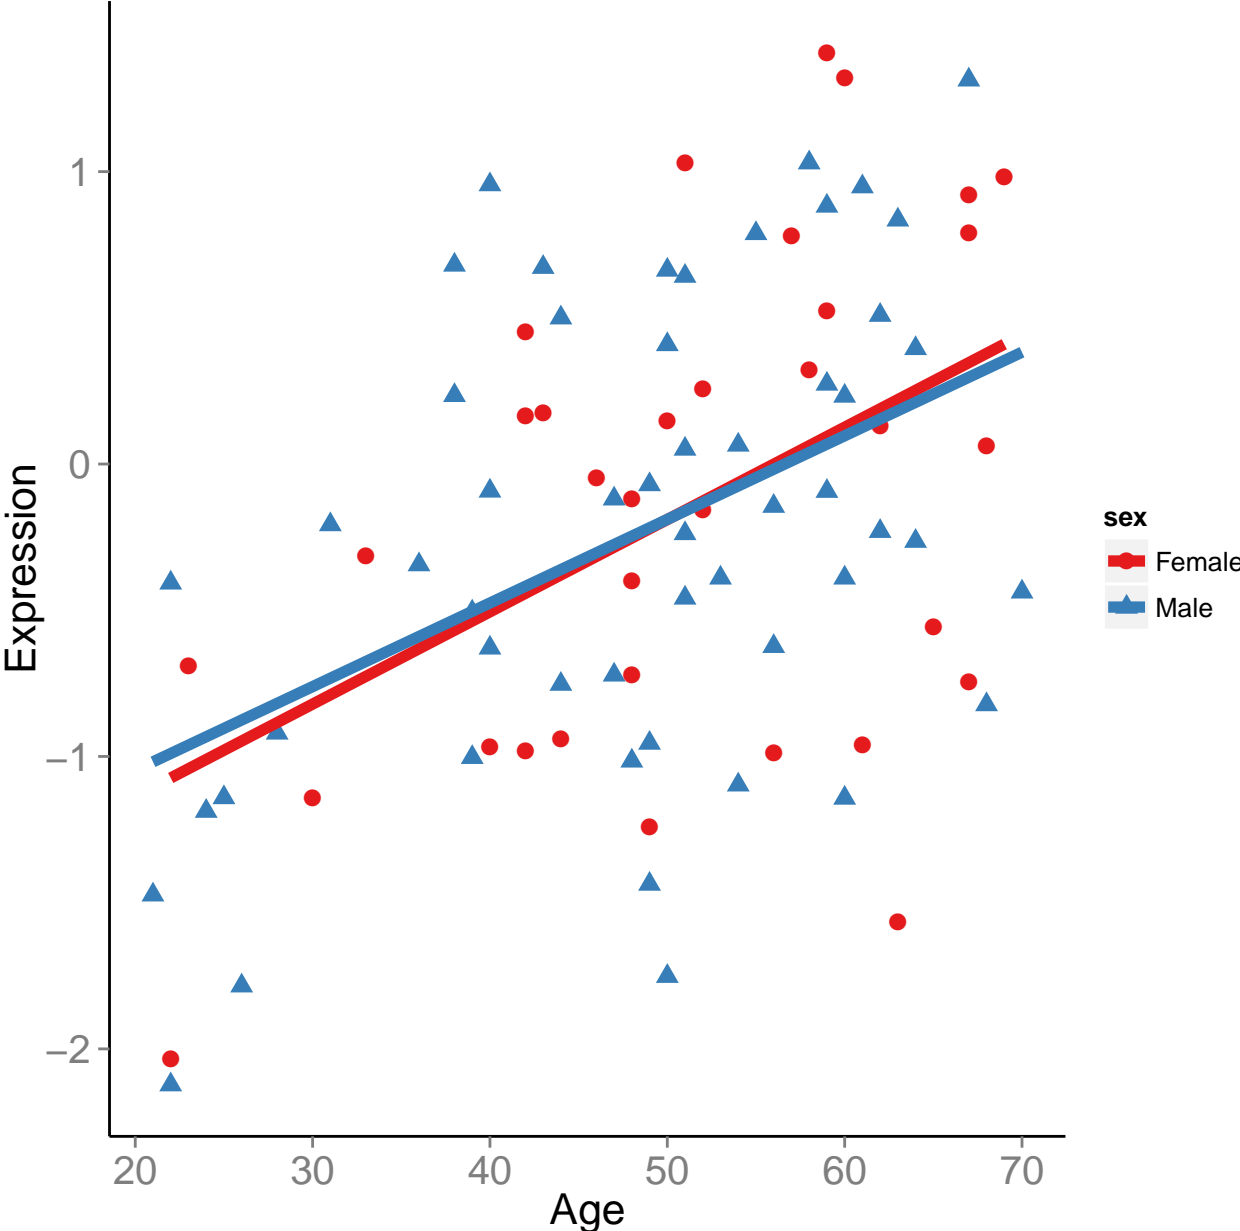

Nerve: SYNDIG1 Pearson-R=-0.46 Pval=5.82E-06

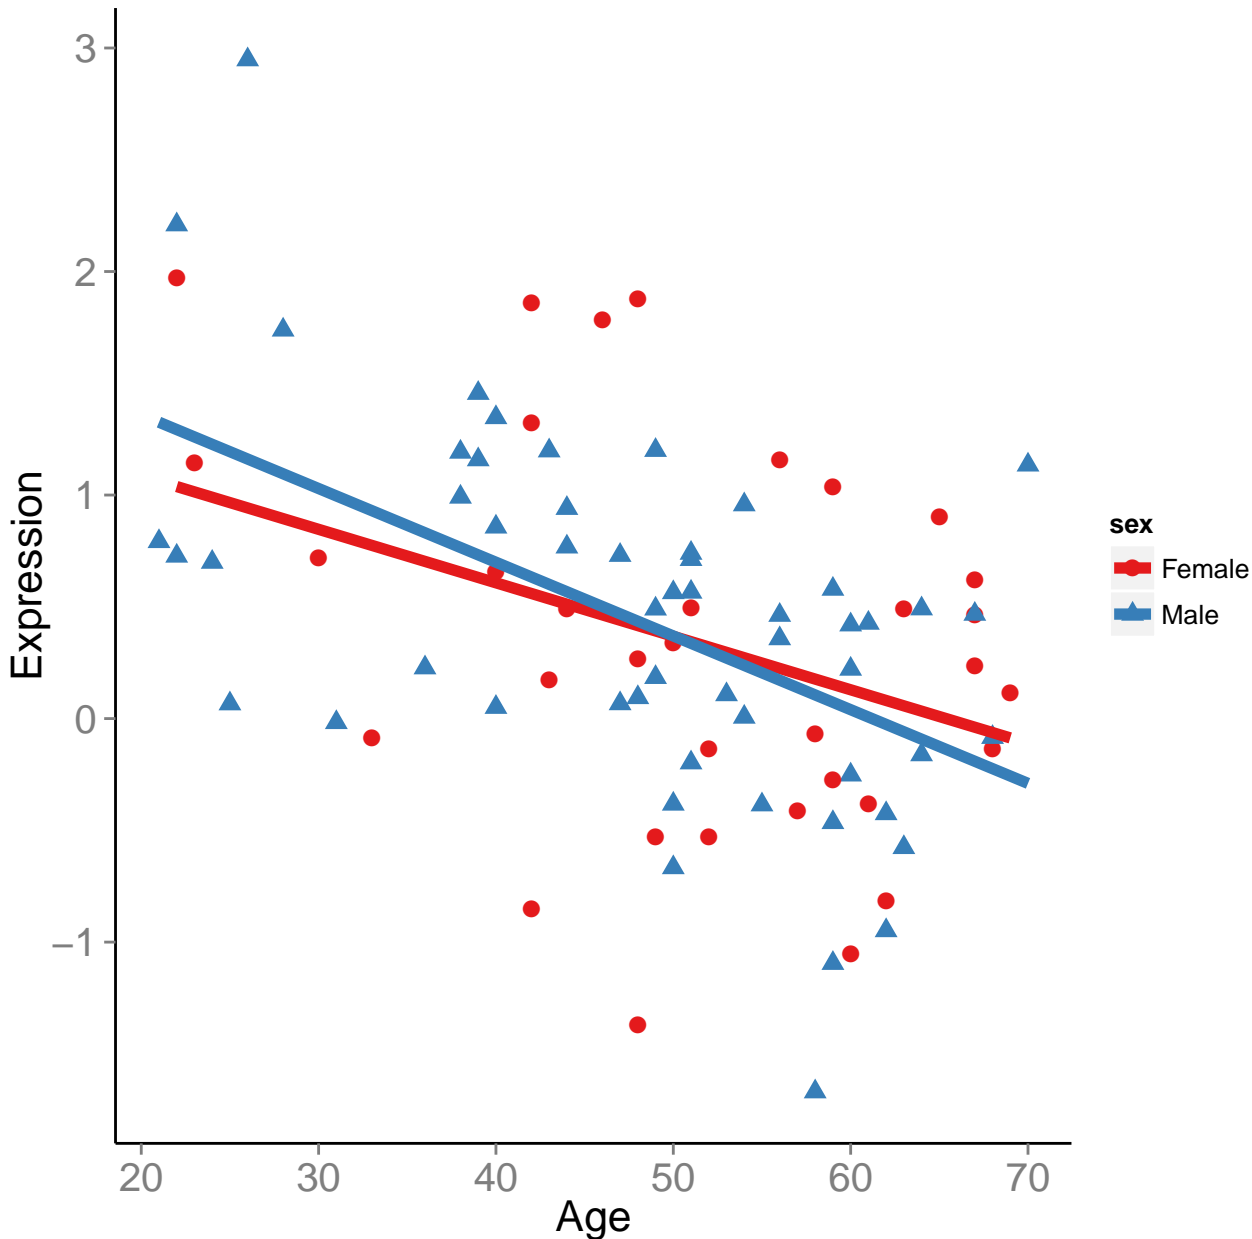

Nerve: CNKSR3 Pearson-R=0.46 Pval=5.69E-06

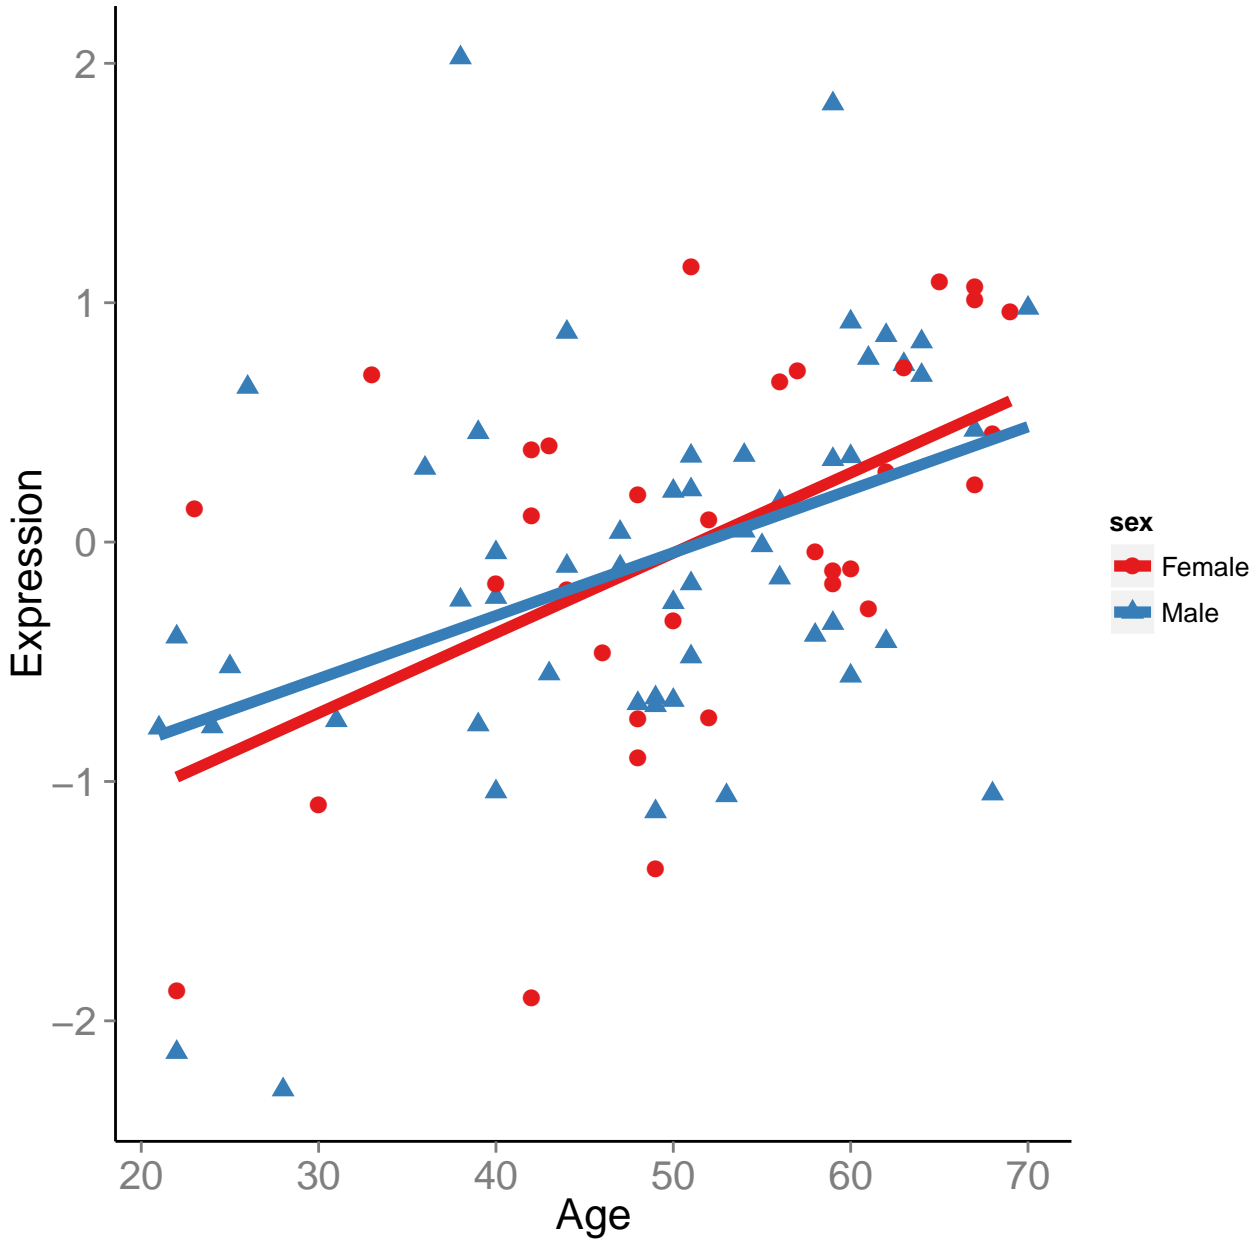

Nerve: CHP2 Pearson-R=-0.46 Pval=5.42E-06

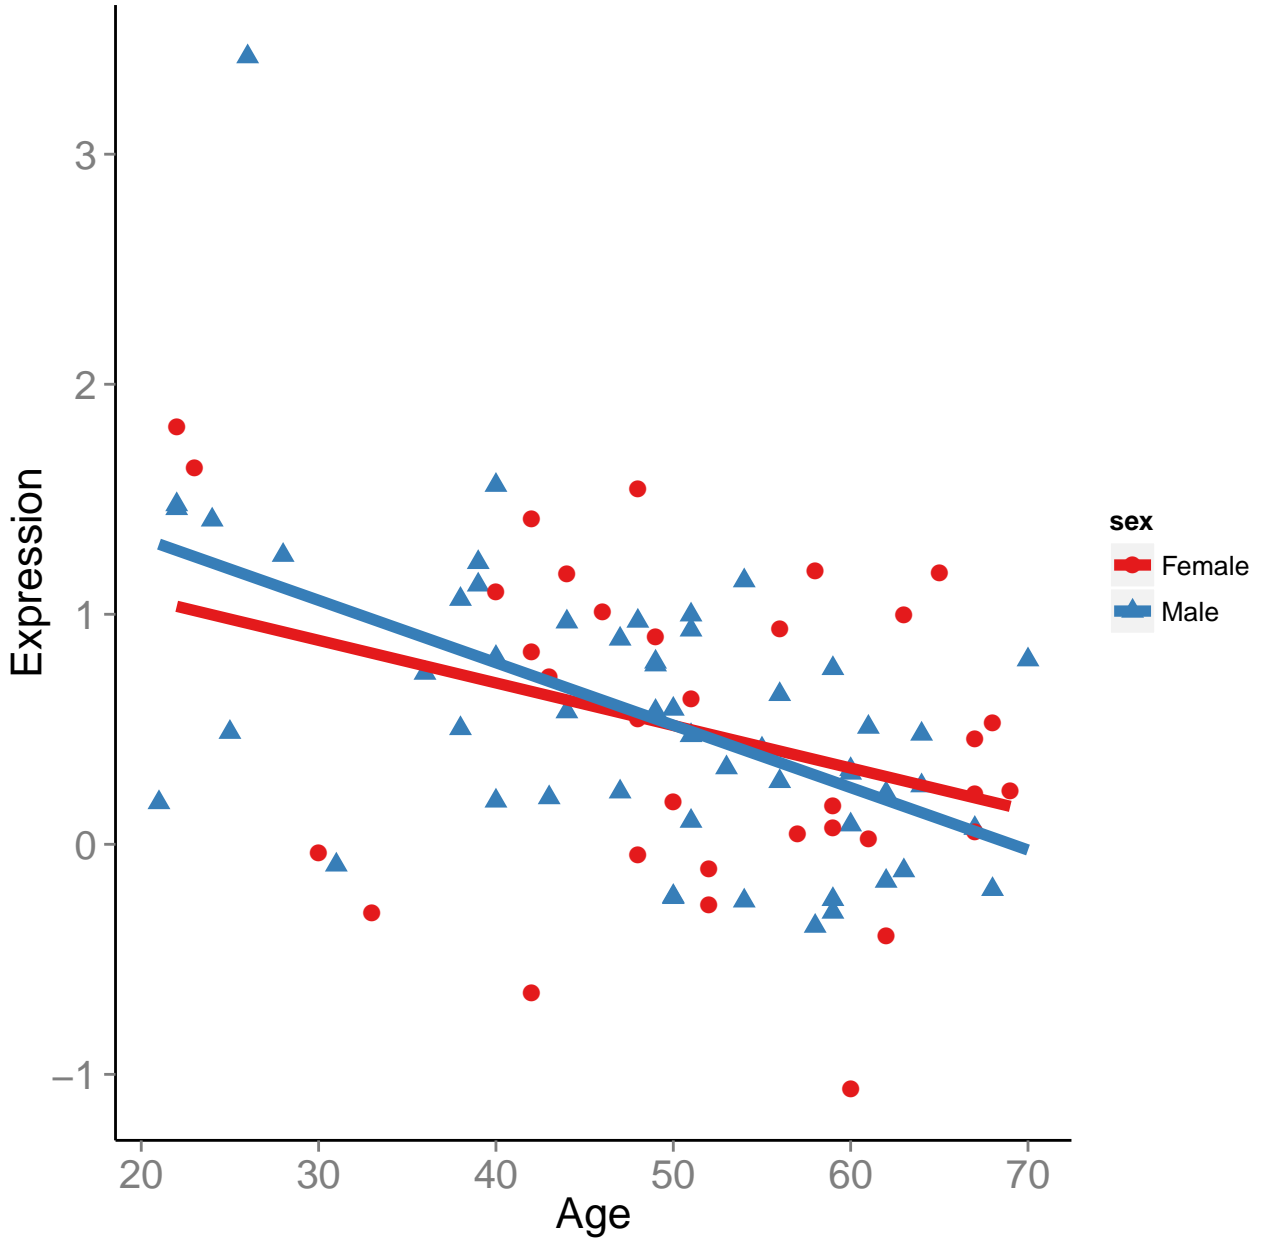

Nerve: AHCTF1 Pearson-R=0.46 Pval=6.07E-06

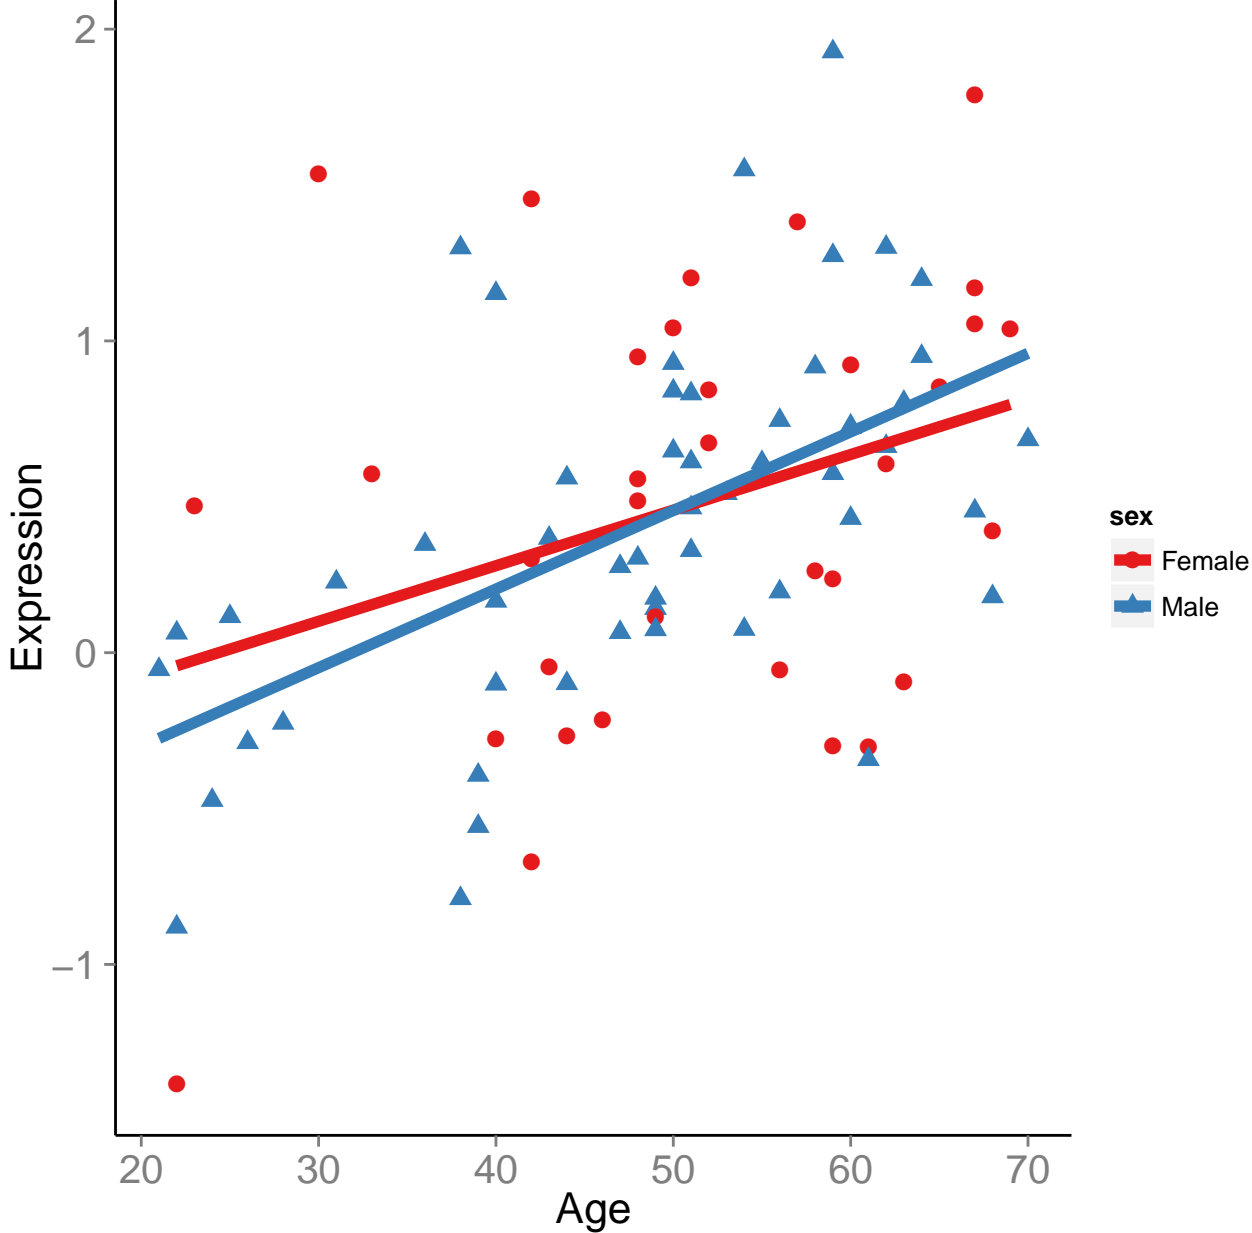

Nerve: SLC35F1 Pearson-R=0.46 Pval=6.00E-06

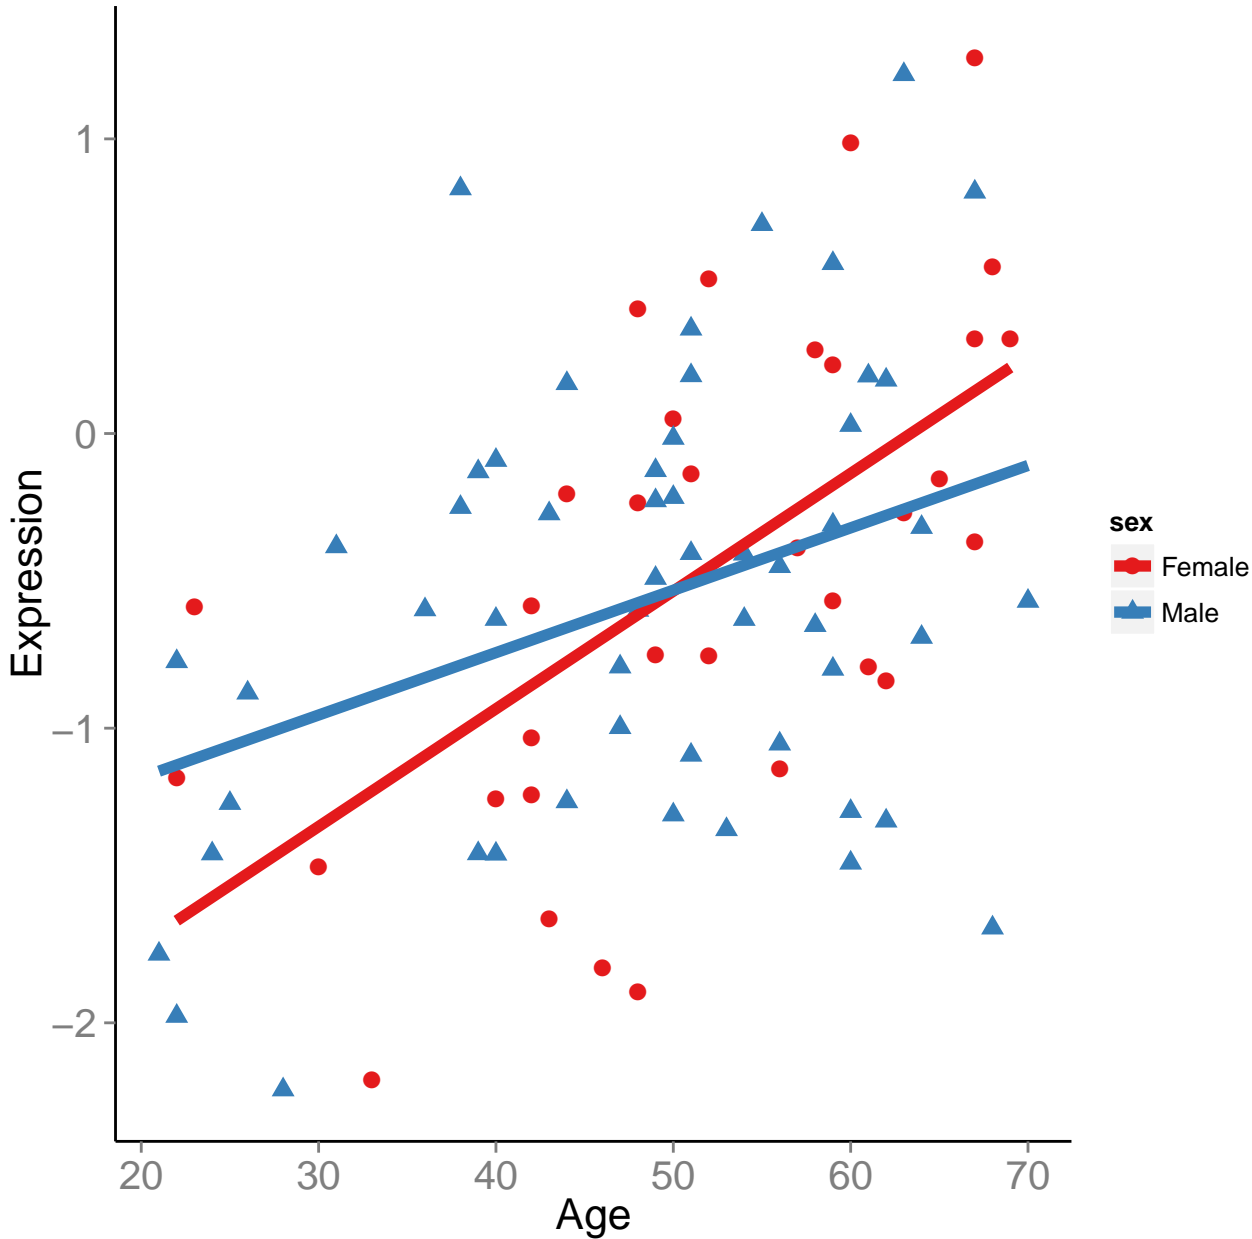

Nerve: PLOD1 Pearson-R=0.46 Pval=7.20E-06

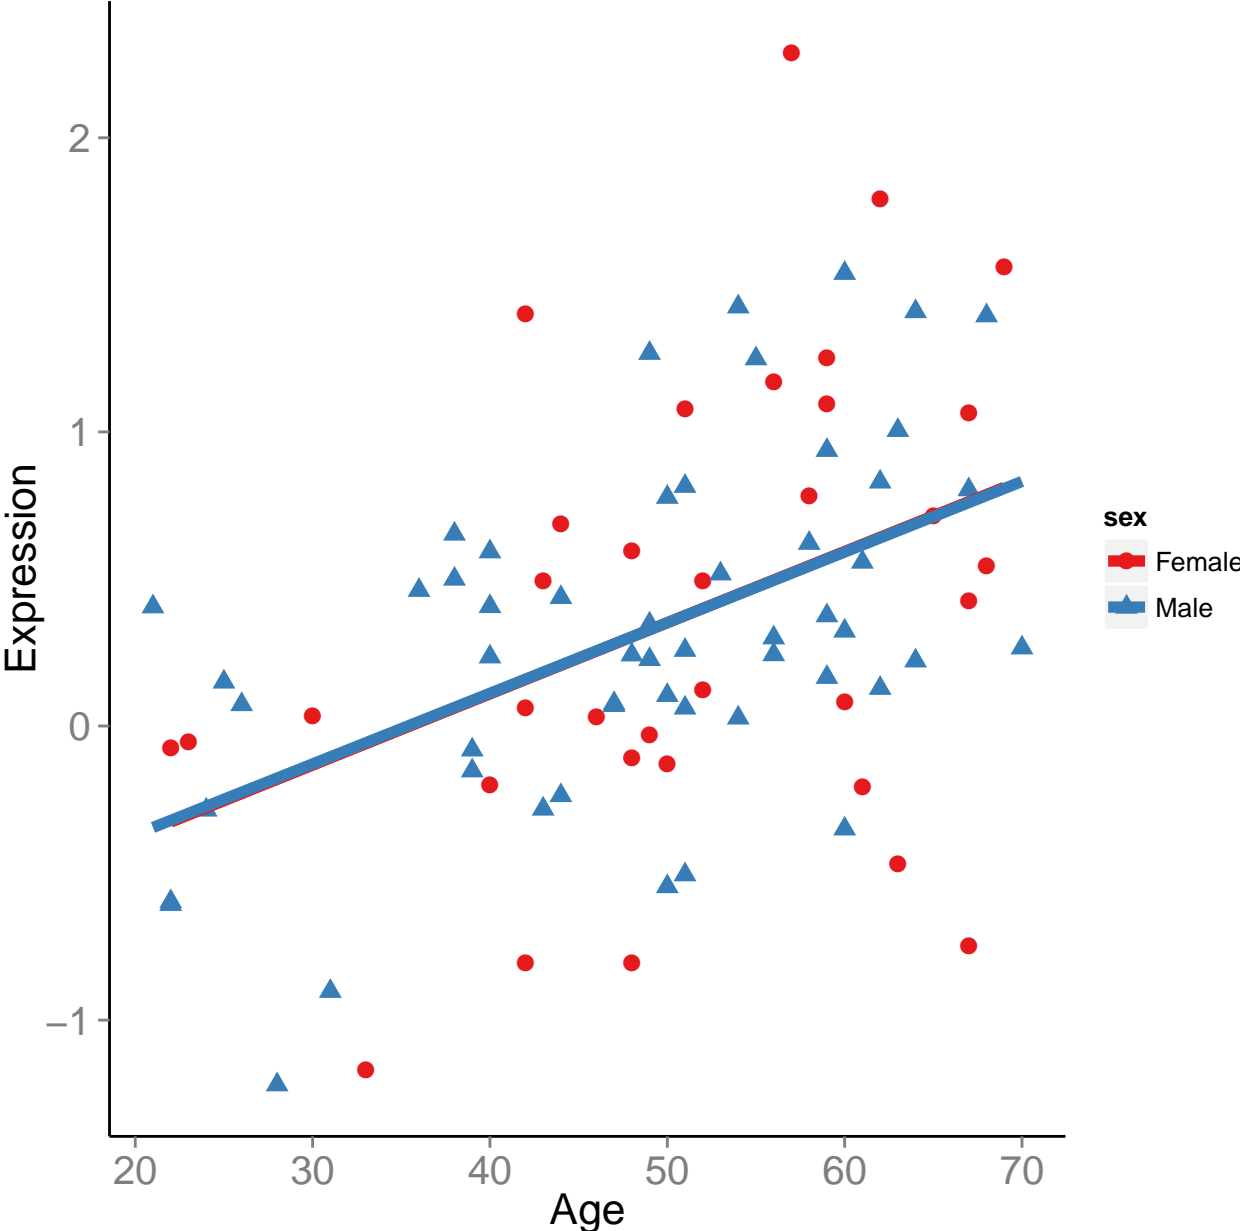



Nerve: RNF157 Pearson-R=0.46 Pval=7.22E-06

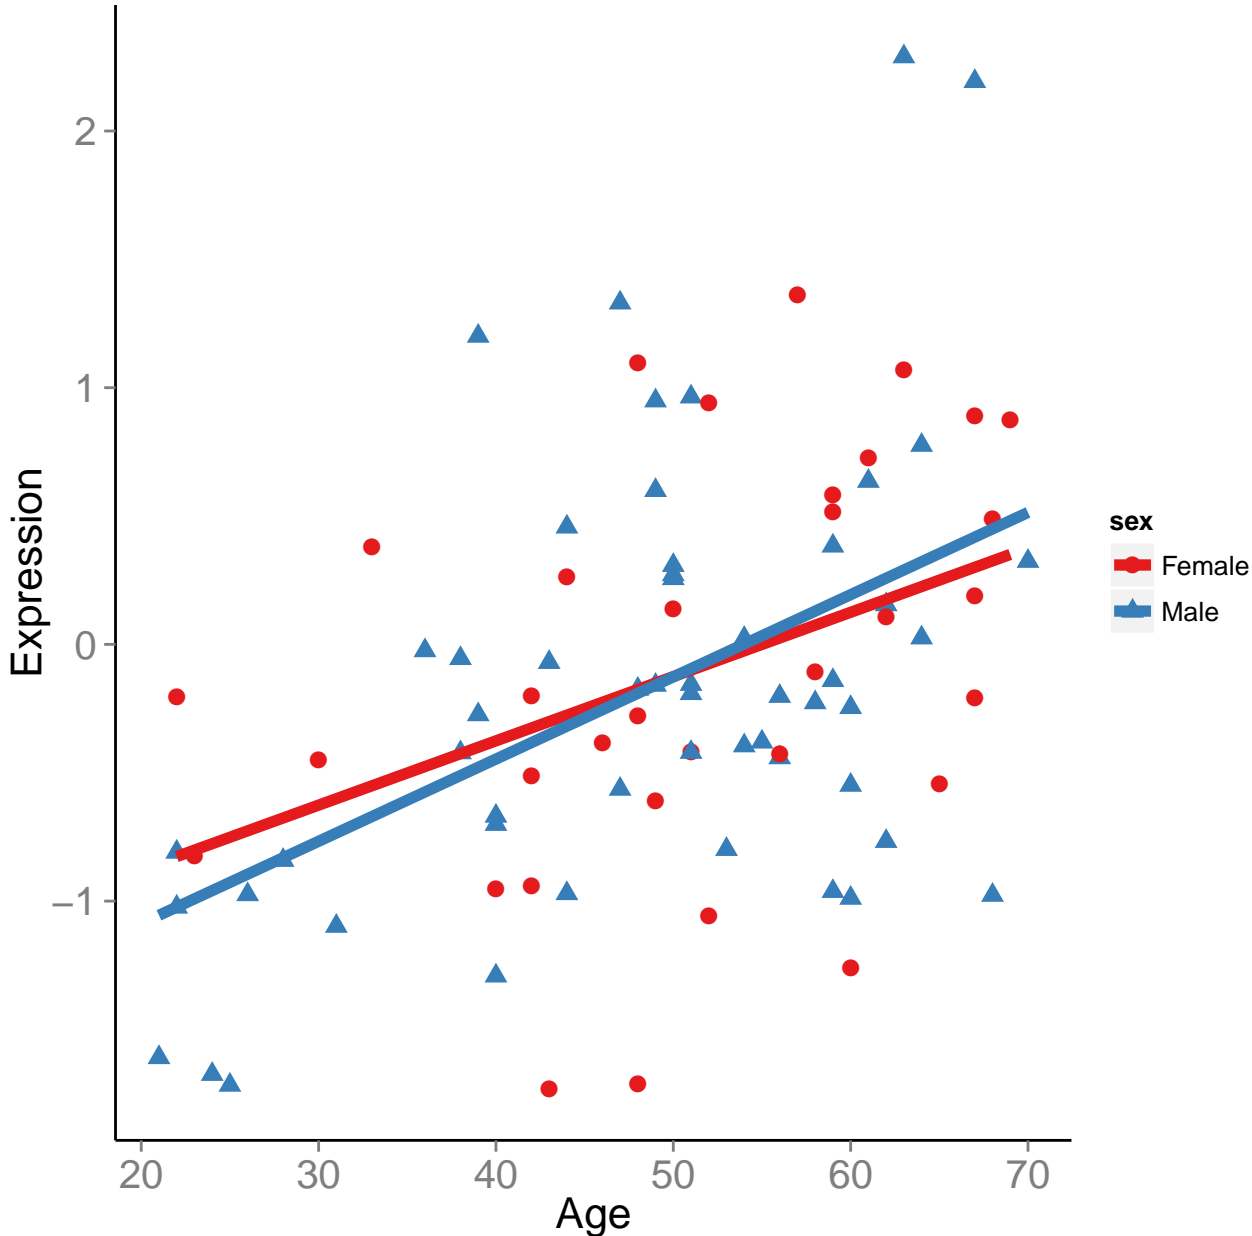

Nerve: LMF2 Pearson-R=0.46 Pval=7.42E-06

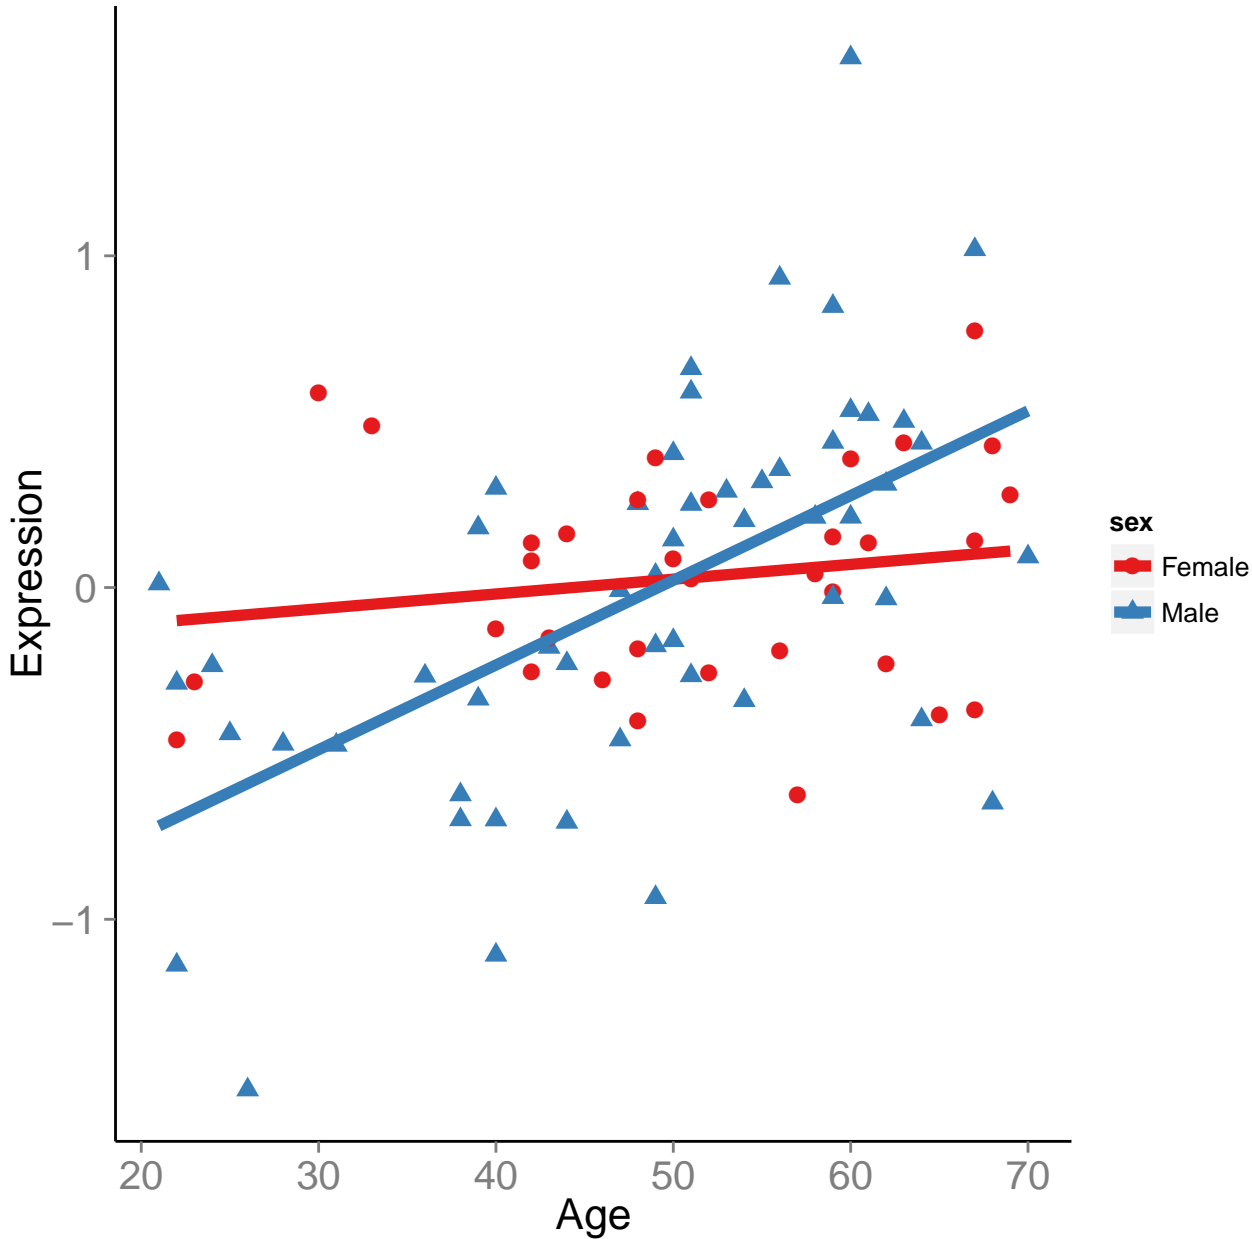

Nerve: RP11-626G11.3 Pearson-R=-0.46 Pval=7.57E-06

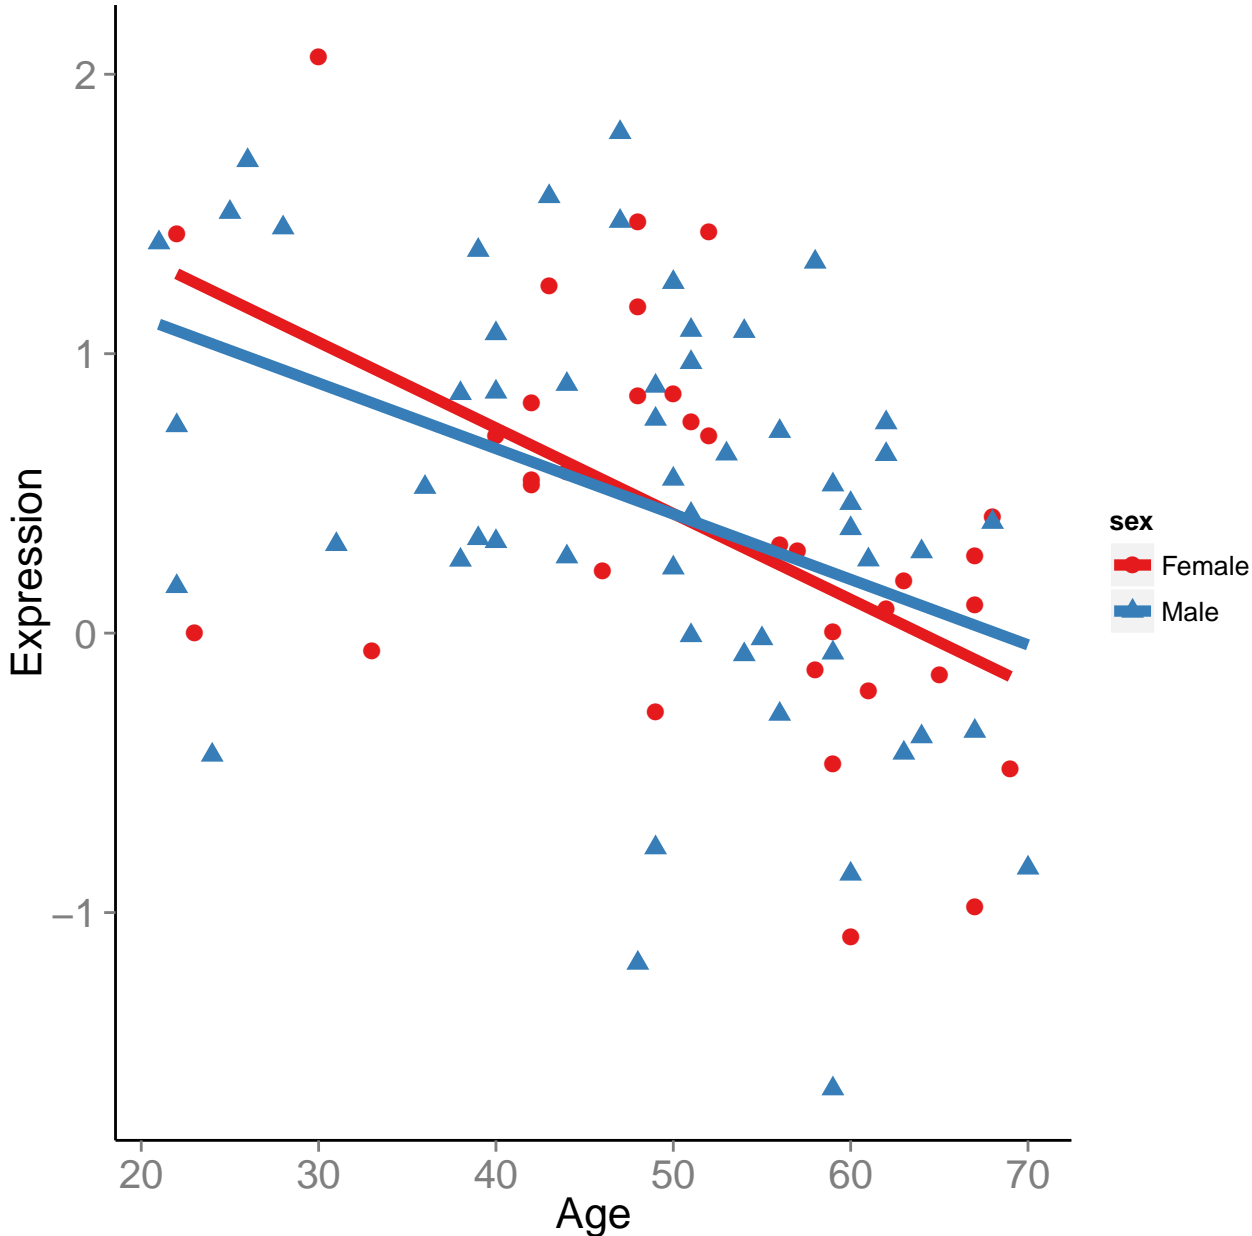

Nerve: TTC9 Pearson-R=-0.46 Pval=7.51E-06

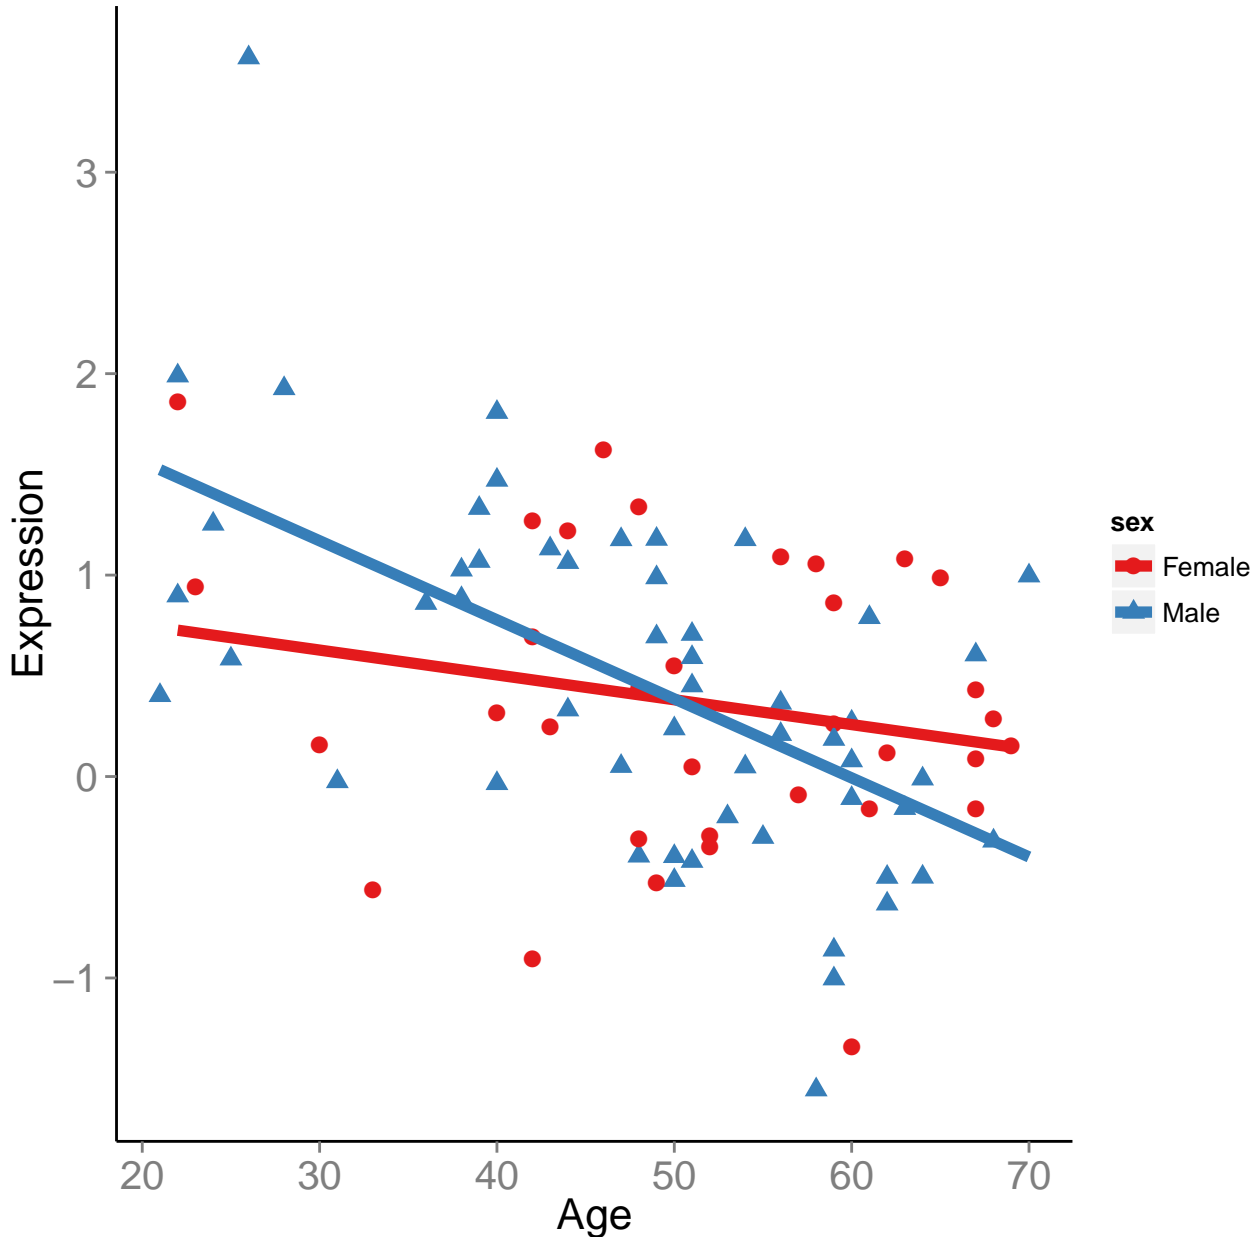

Nerve: RP4-724E13.2 Pearson-R=0.46 Pval=7.80E-06

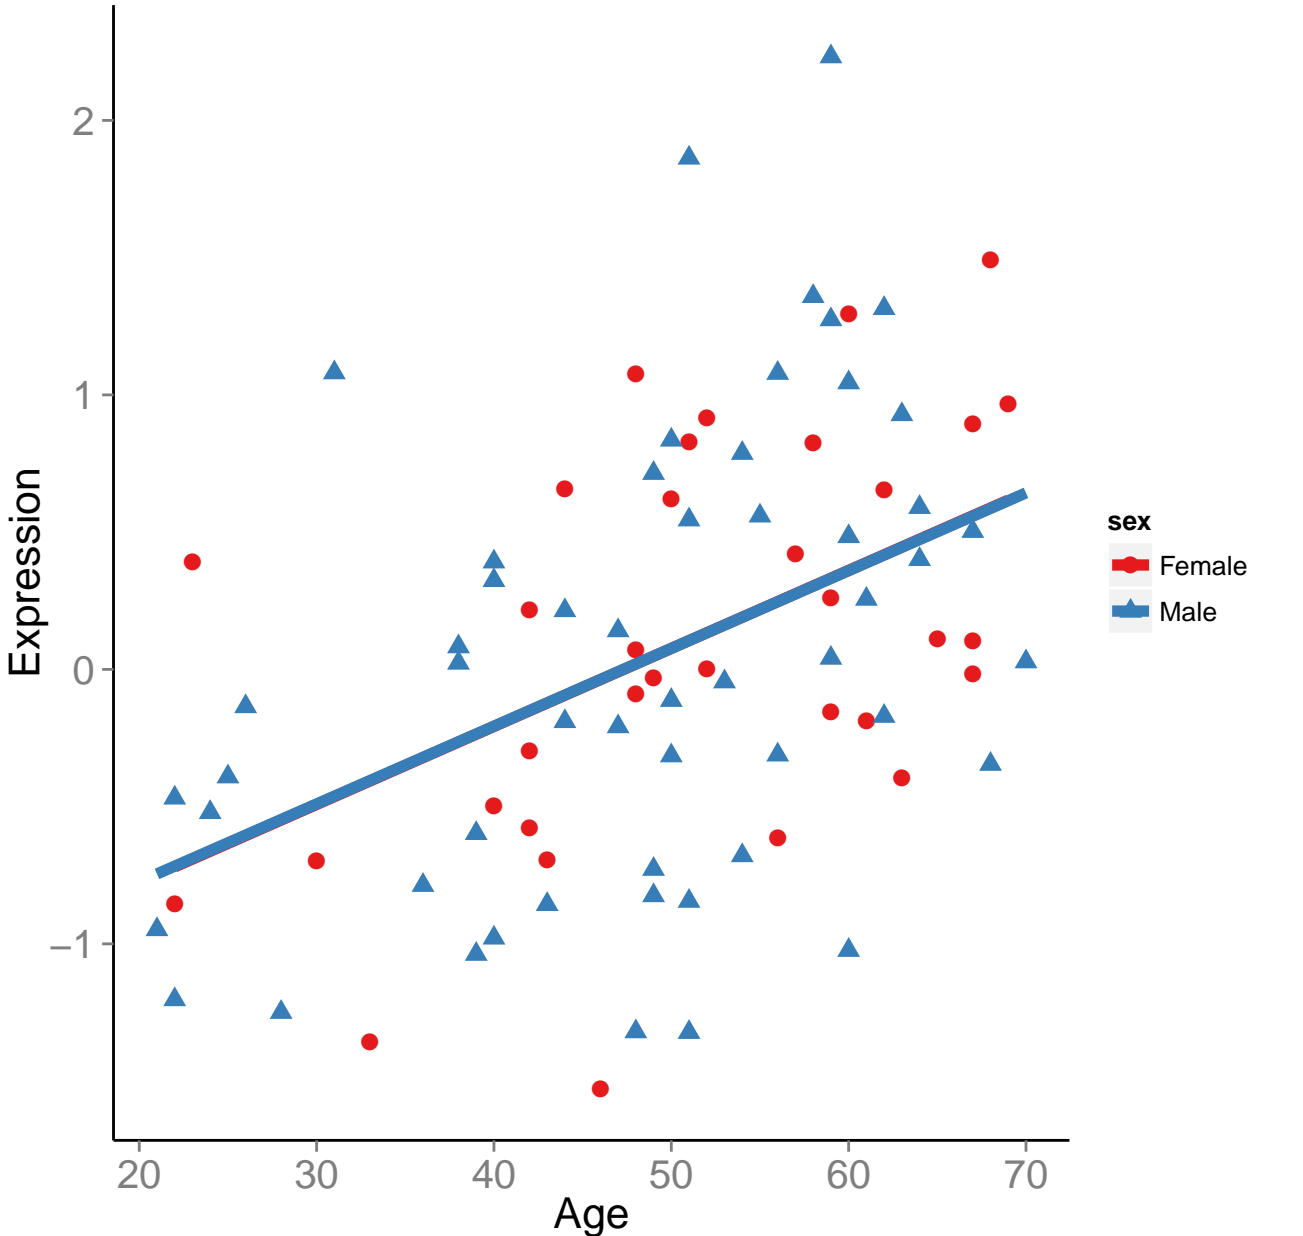

Nerve: NTN1 Pearson-R=-0.46 Pval=8.42E-06

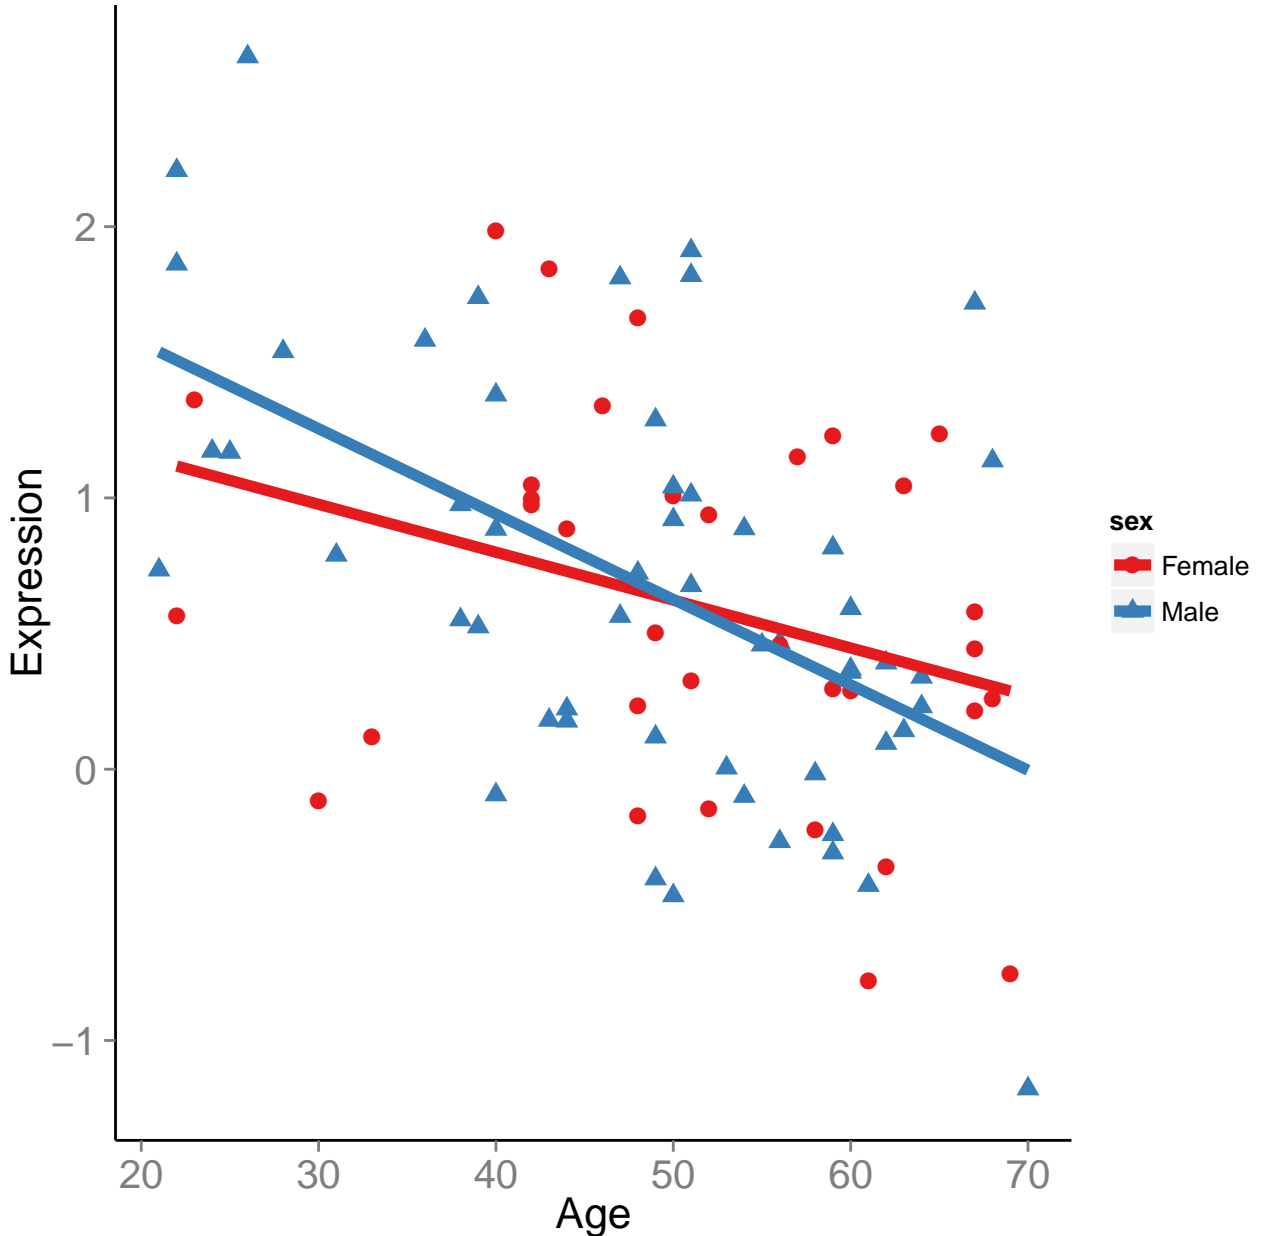

Nerve: TMEM176B Pearson-R=0.45 Pval=8.75E-06

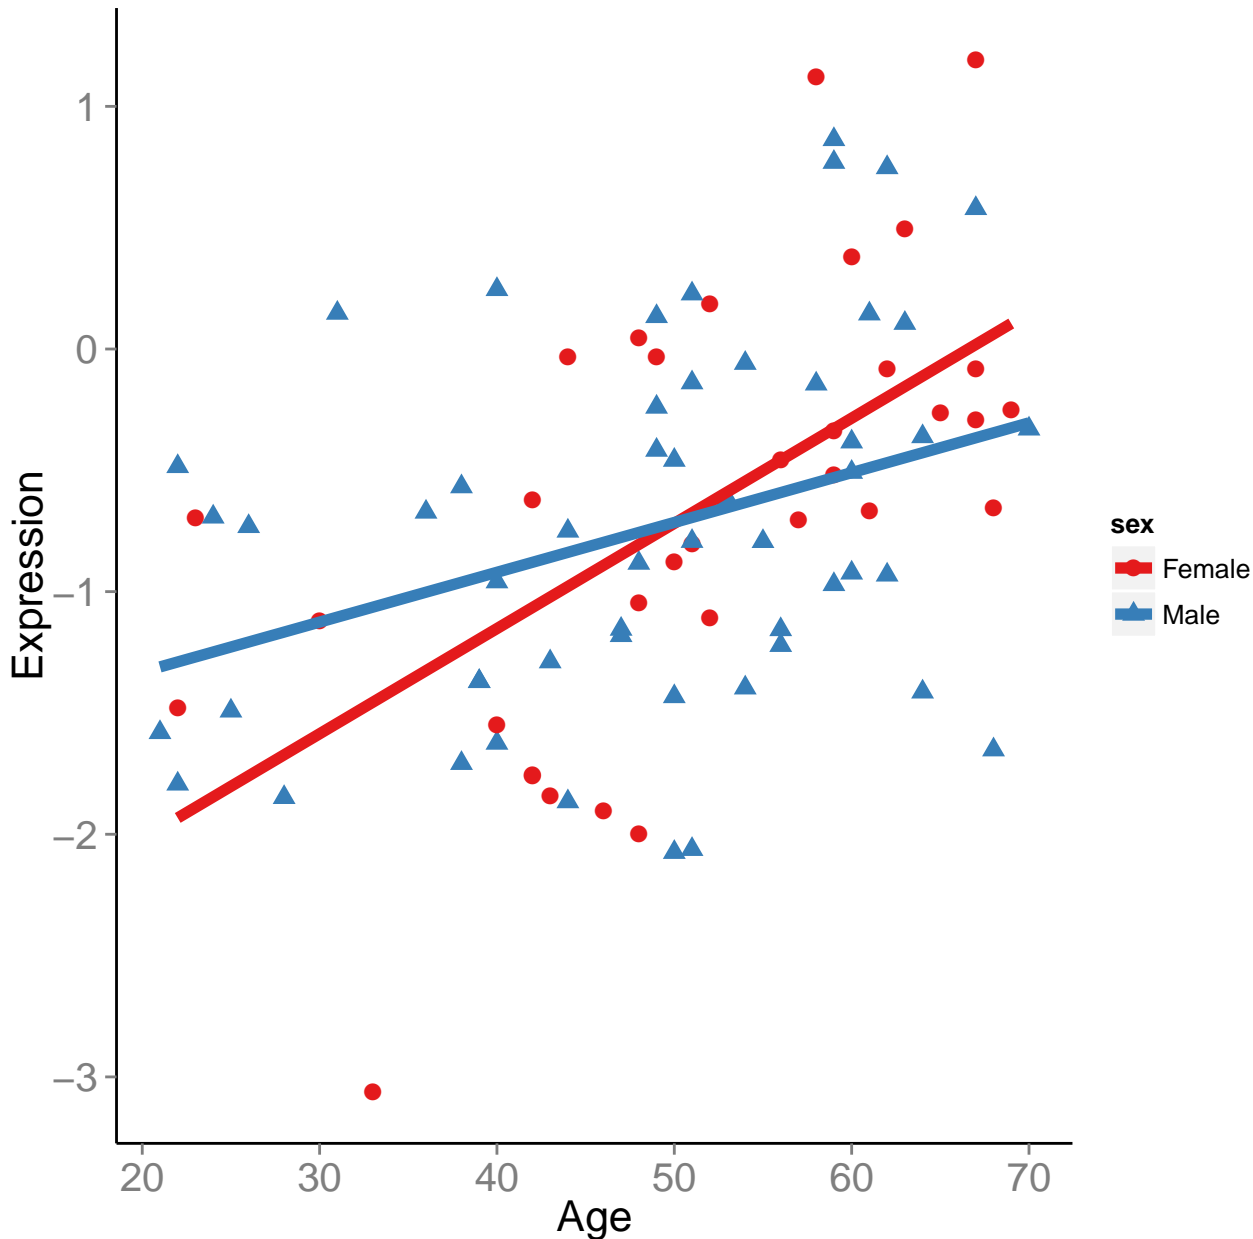

Nerve: ARAP2 Pearson-R=0.45 Pval=8.81E-06

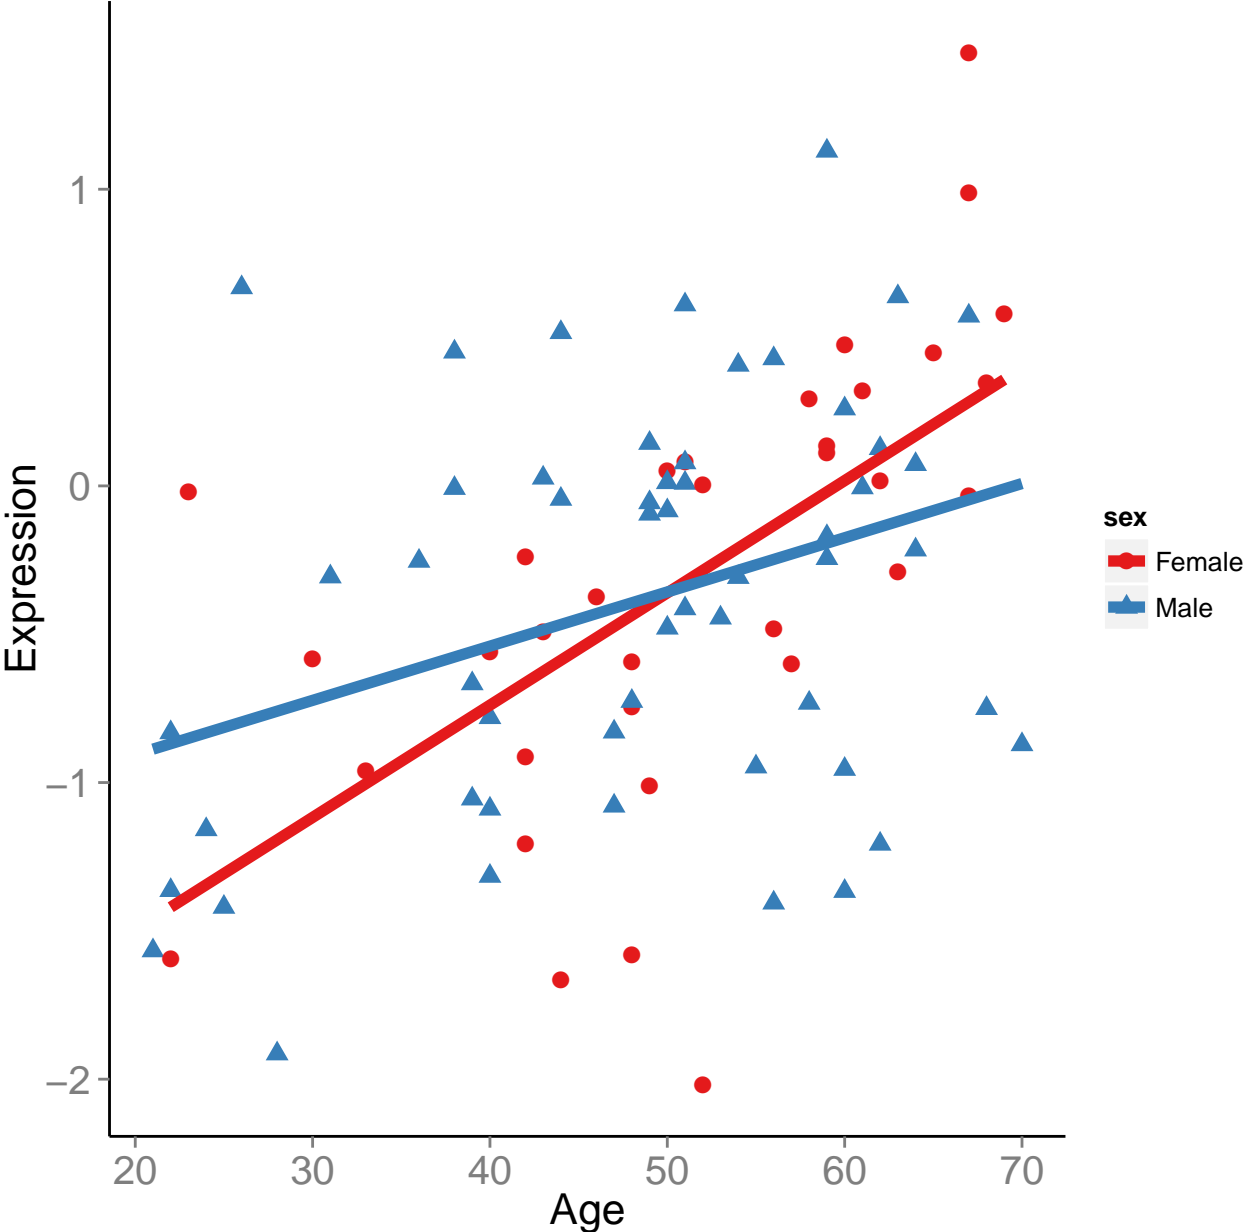



Nerve: VLDLR Pearson-R=-0.45 Pval=8.83E-06

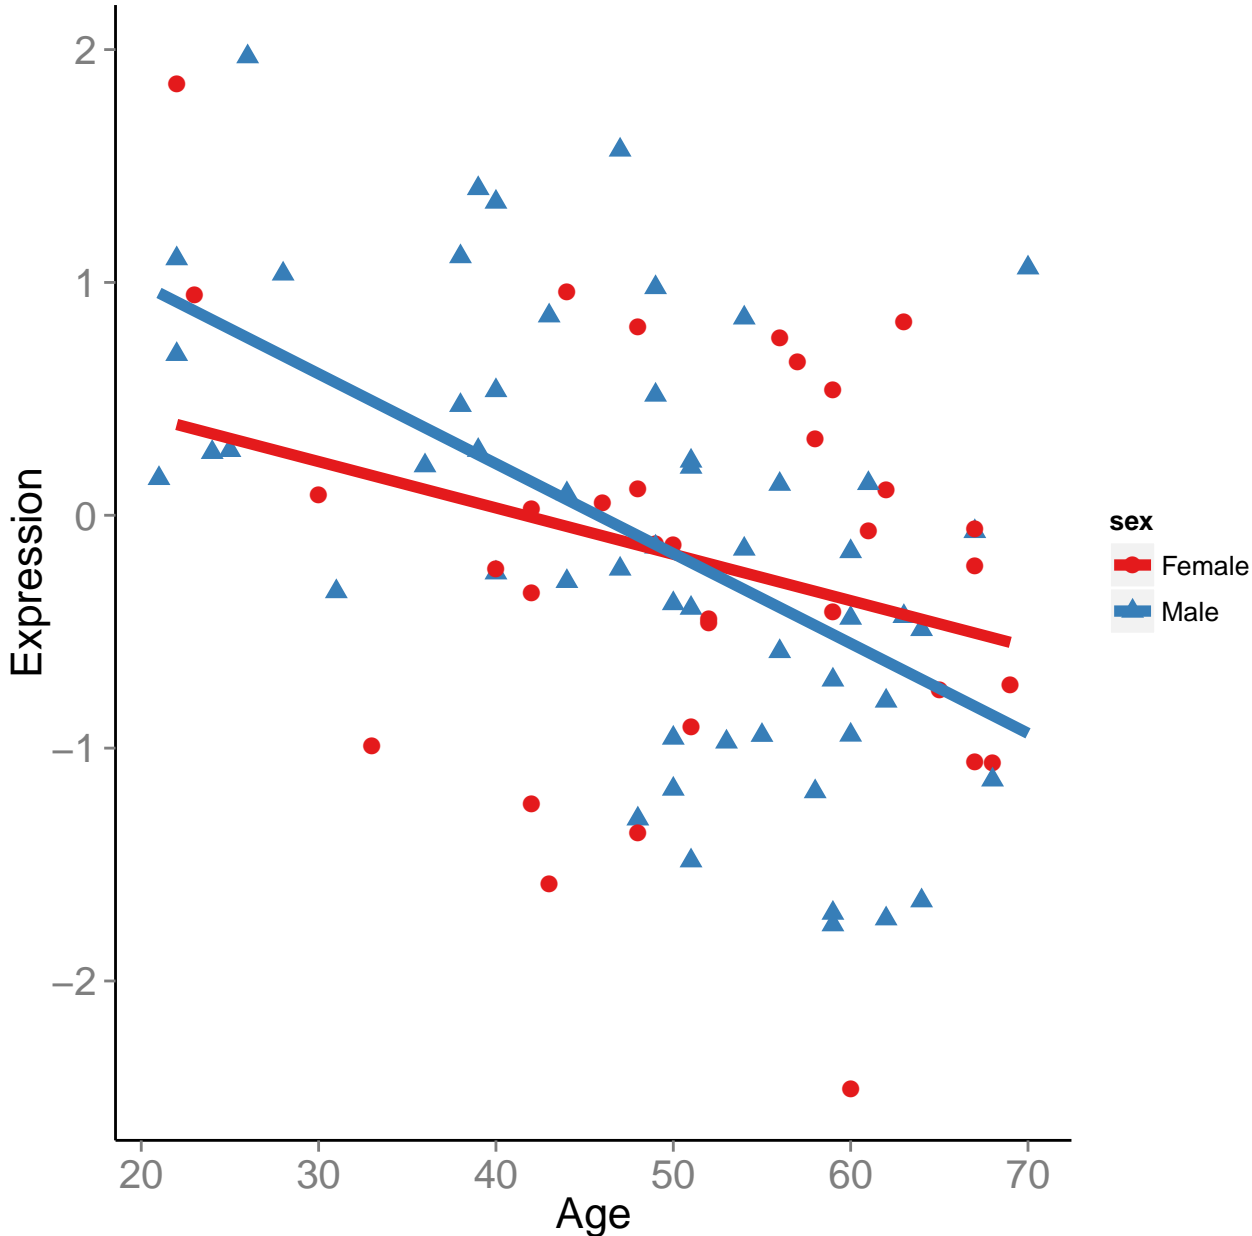

Blood: PLOD3 Pearson-R=0.46 Pval=1.66E-09

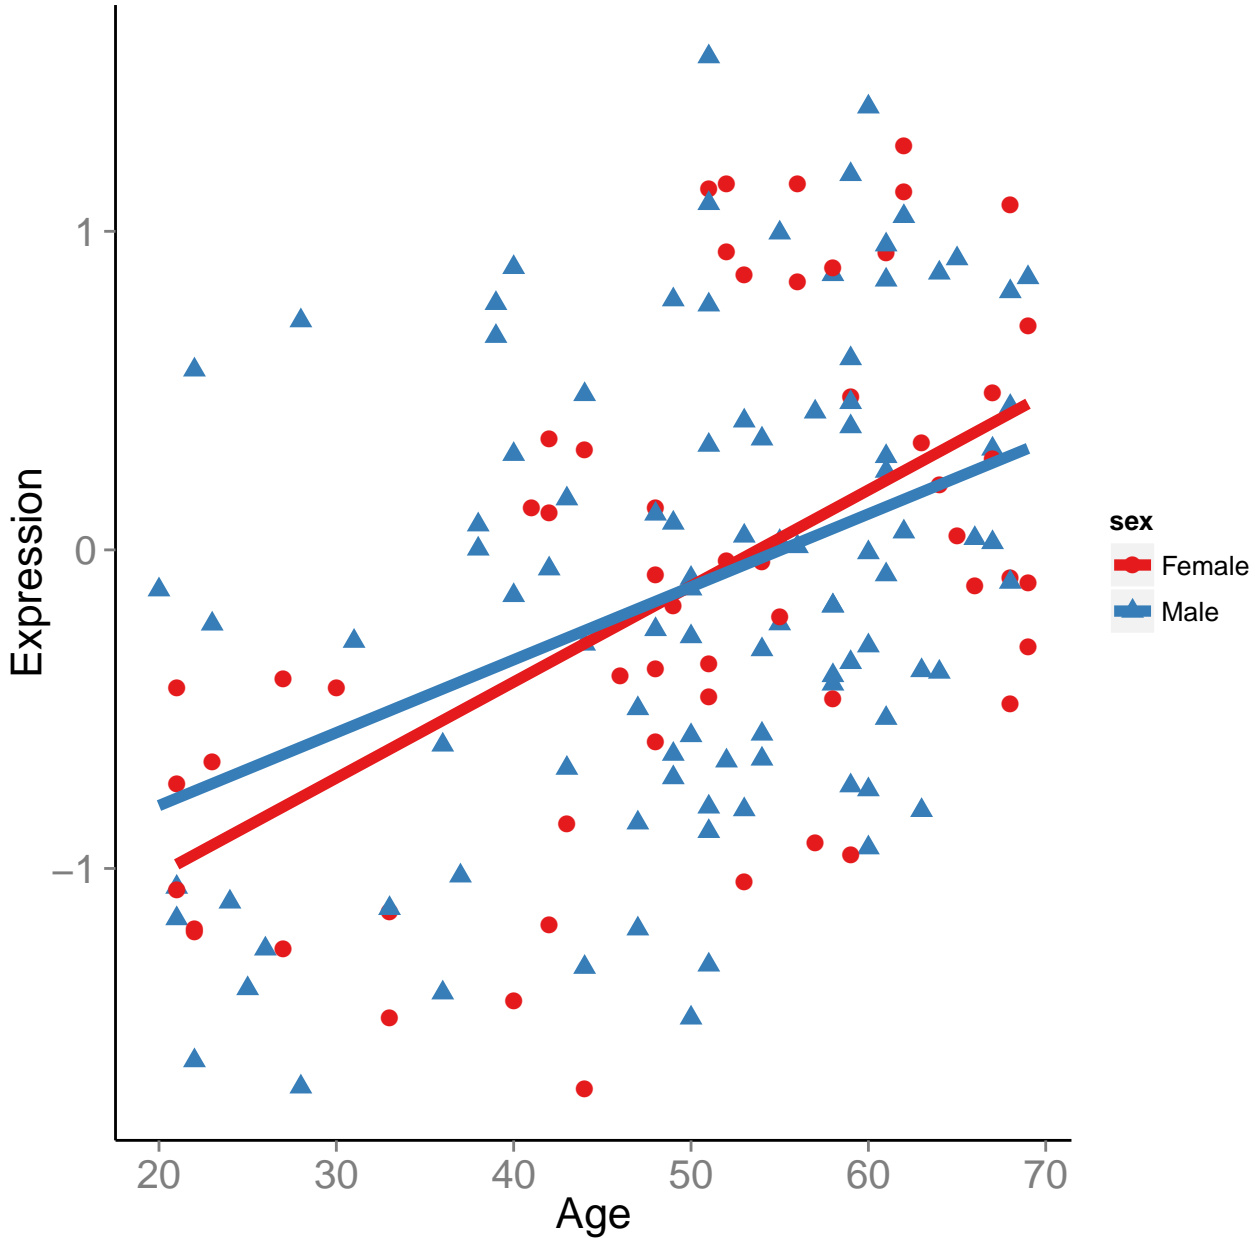

Blood: MYL12B Pearson-R=-0.47 Pval=8.05E-10

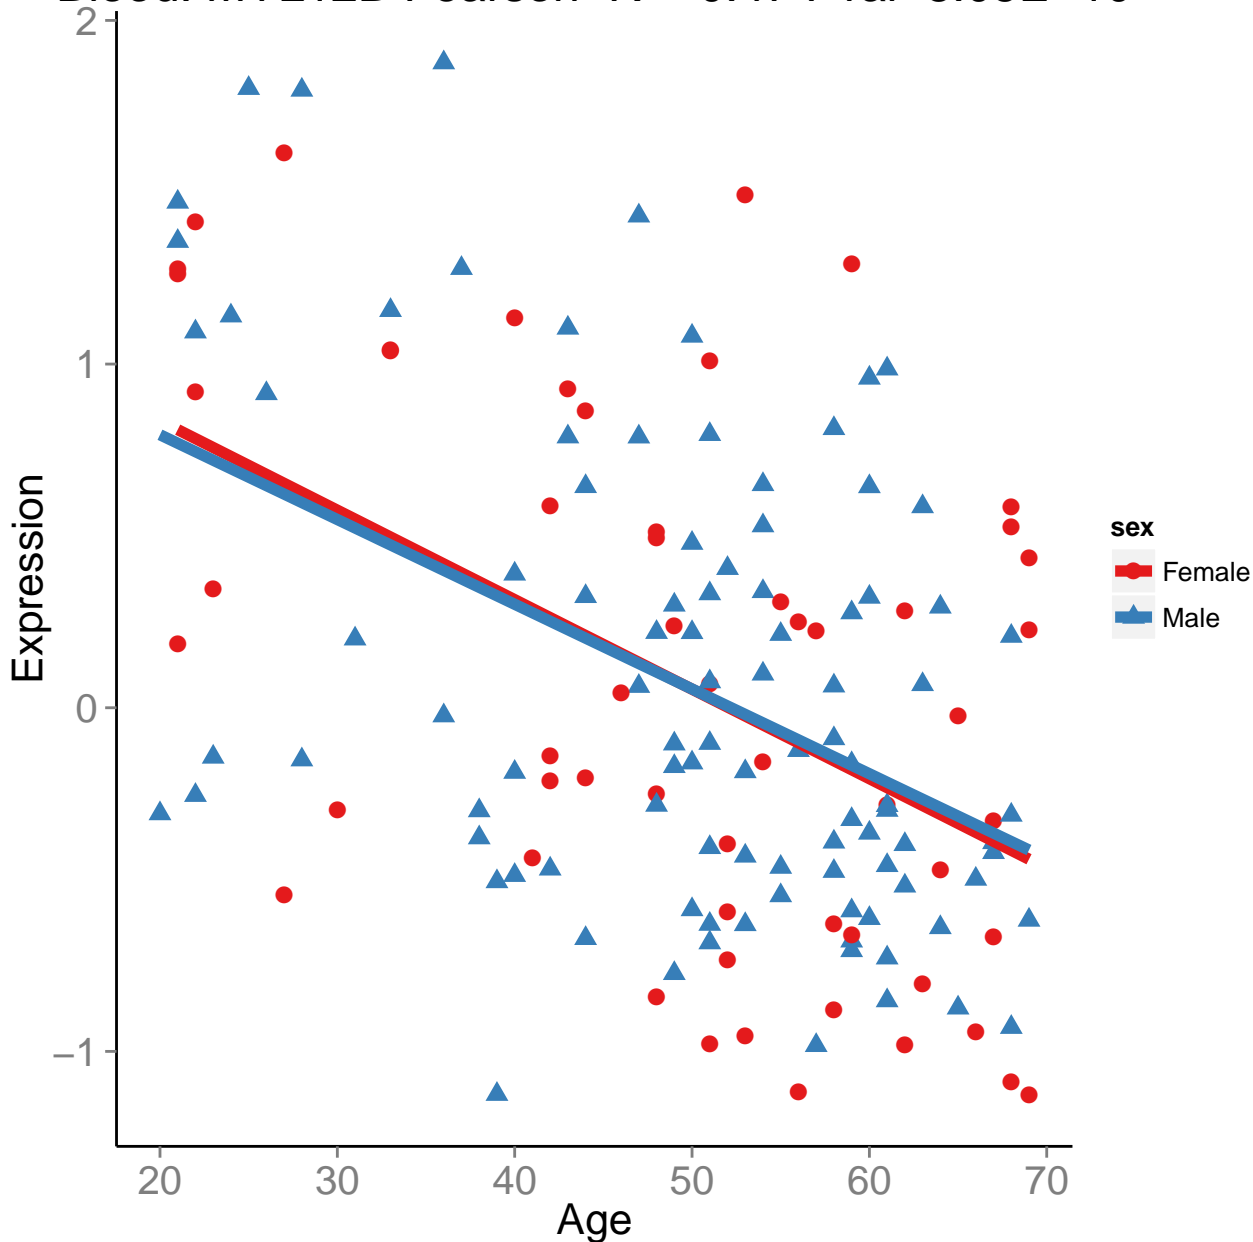



Blood: PEX11B Pearson-R=-0.46 Pval=1.34E-09

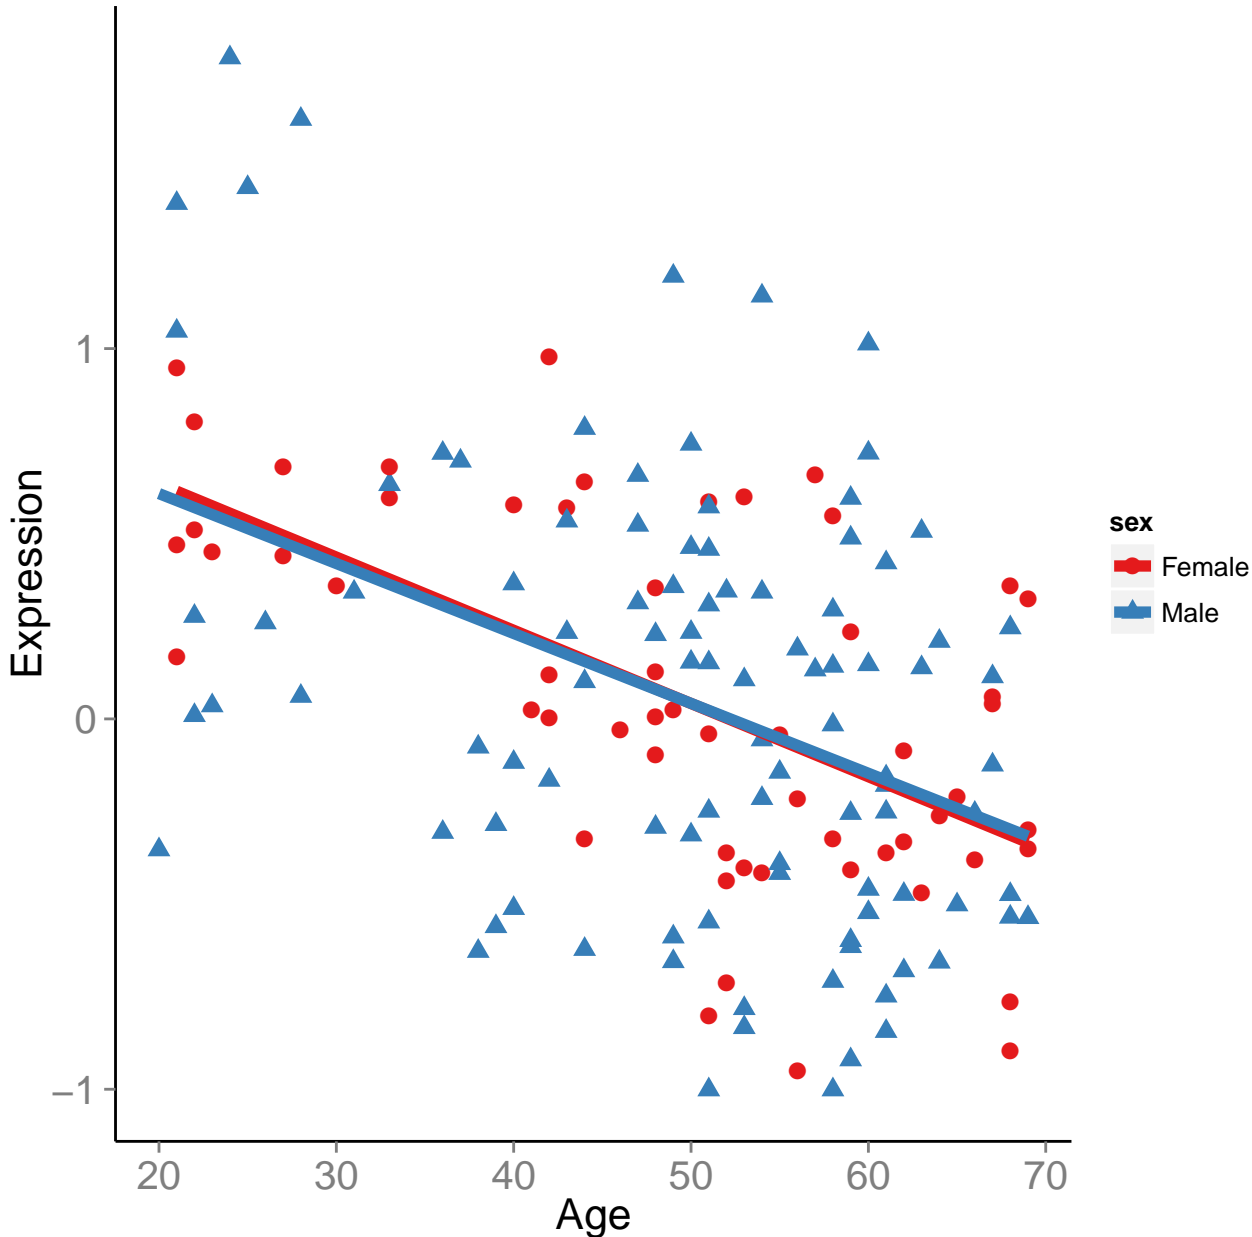

Blood: PAG1 Pearson-R=0.46 Pval=2.30E-09

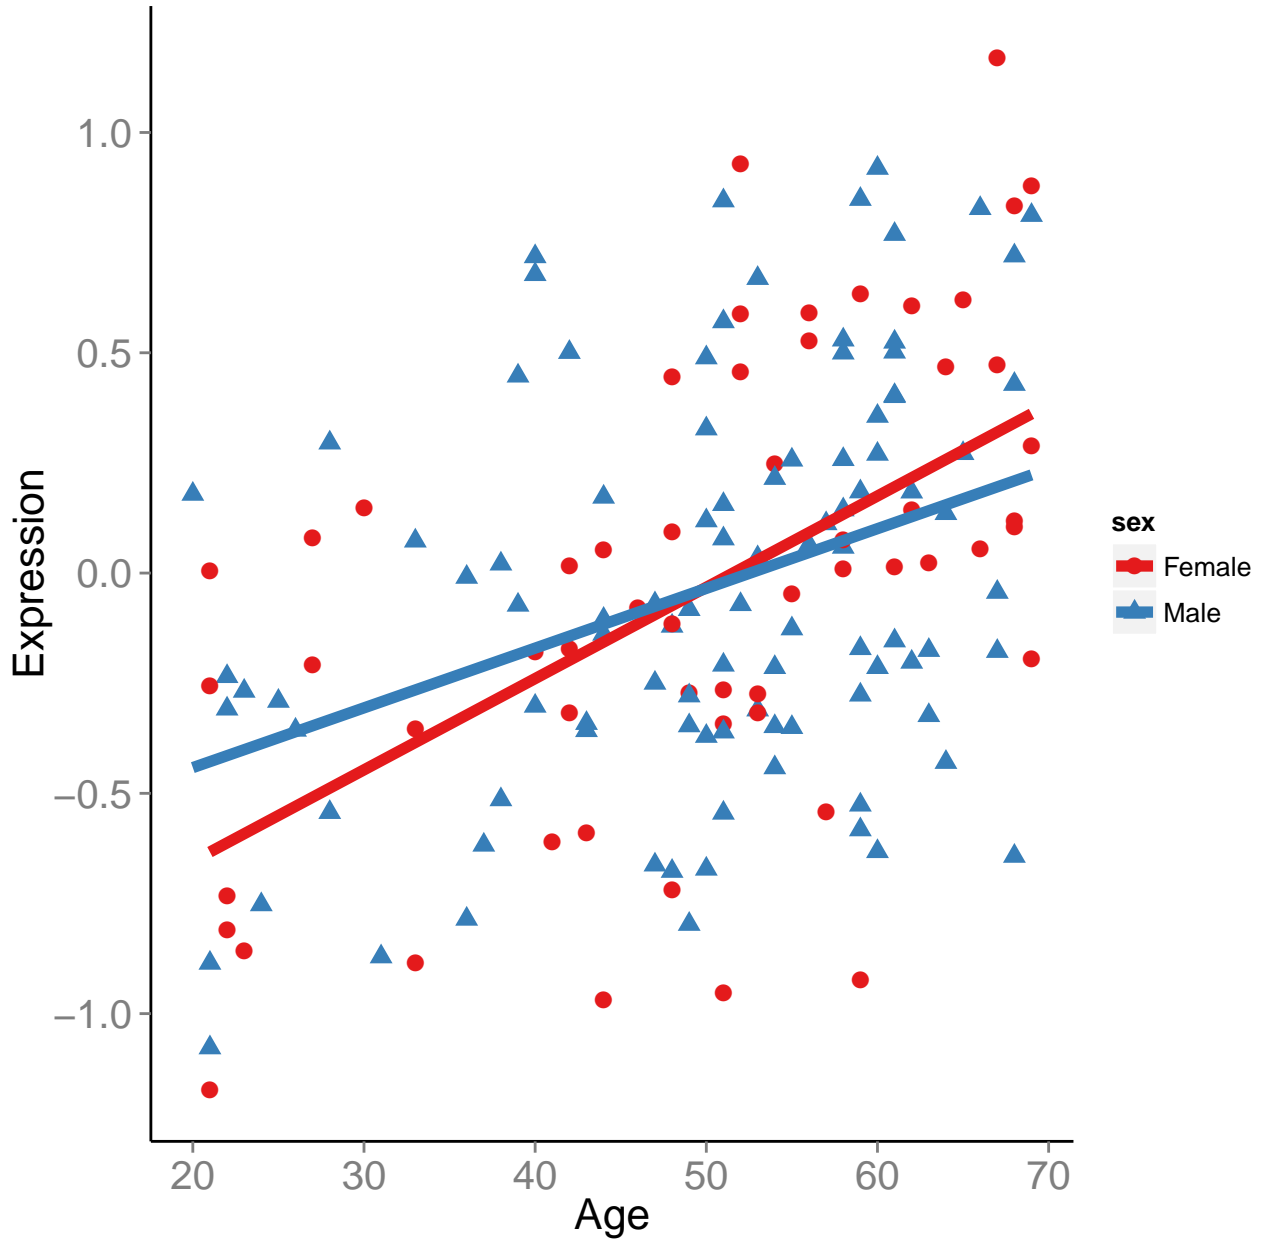

Blood: LRRC45 Pearson-R=0.45 Pval=3.66E-09

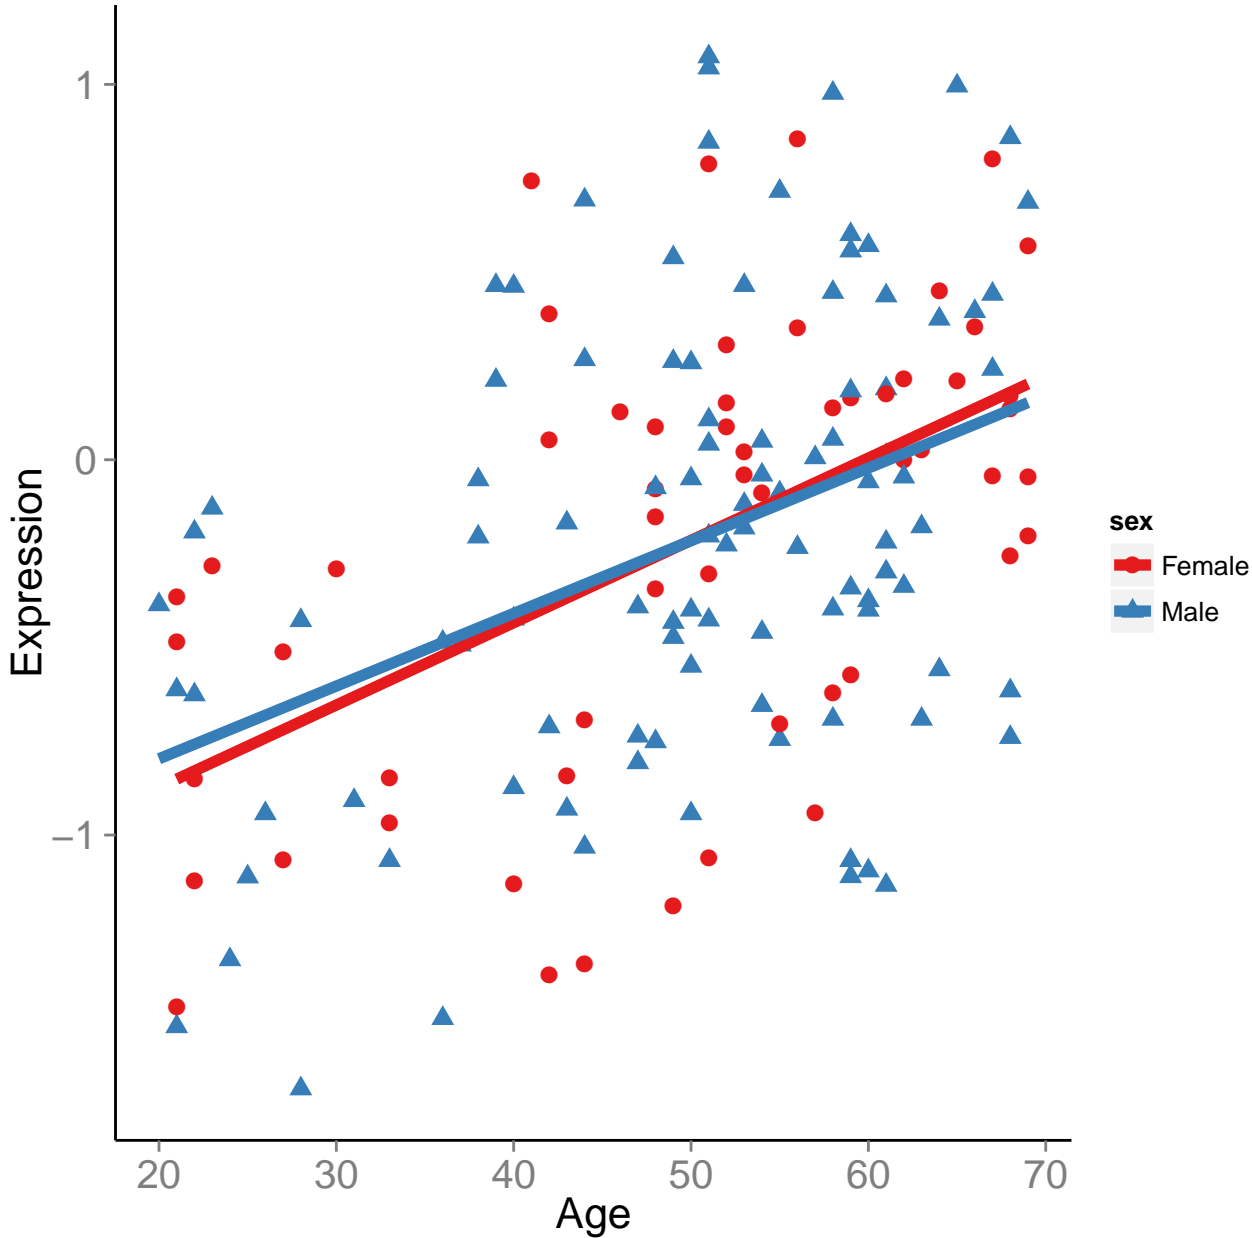

Blood: PSMD7 Pearson-R=-0.45 Pval=3.29E-09

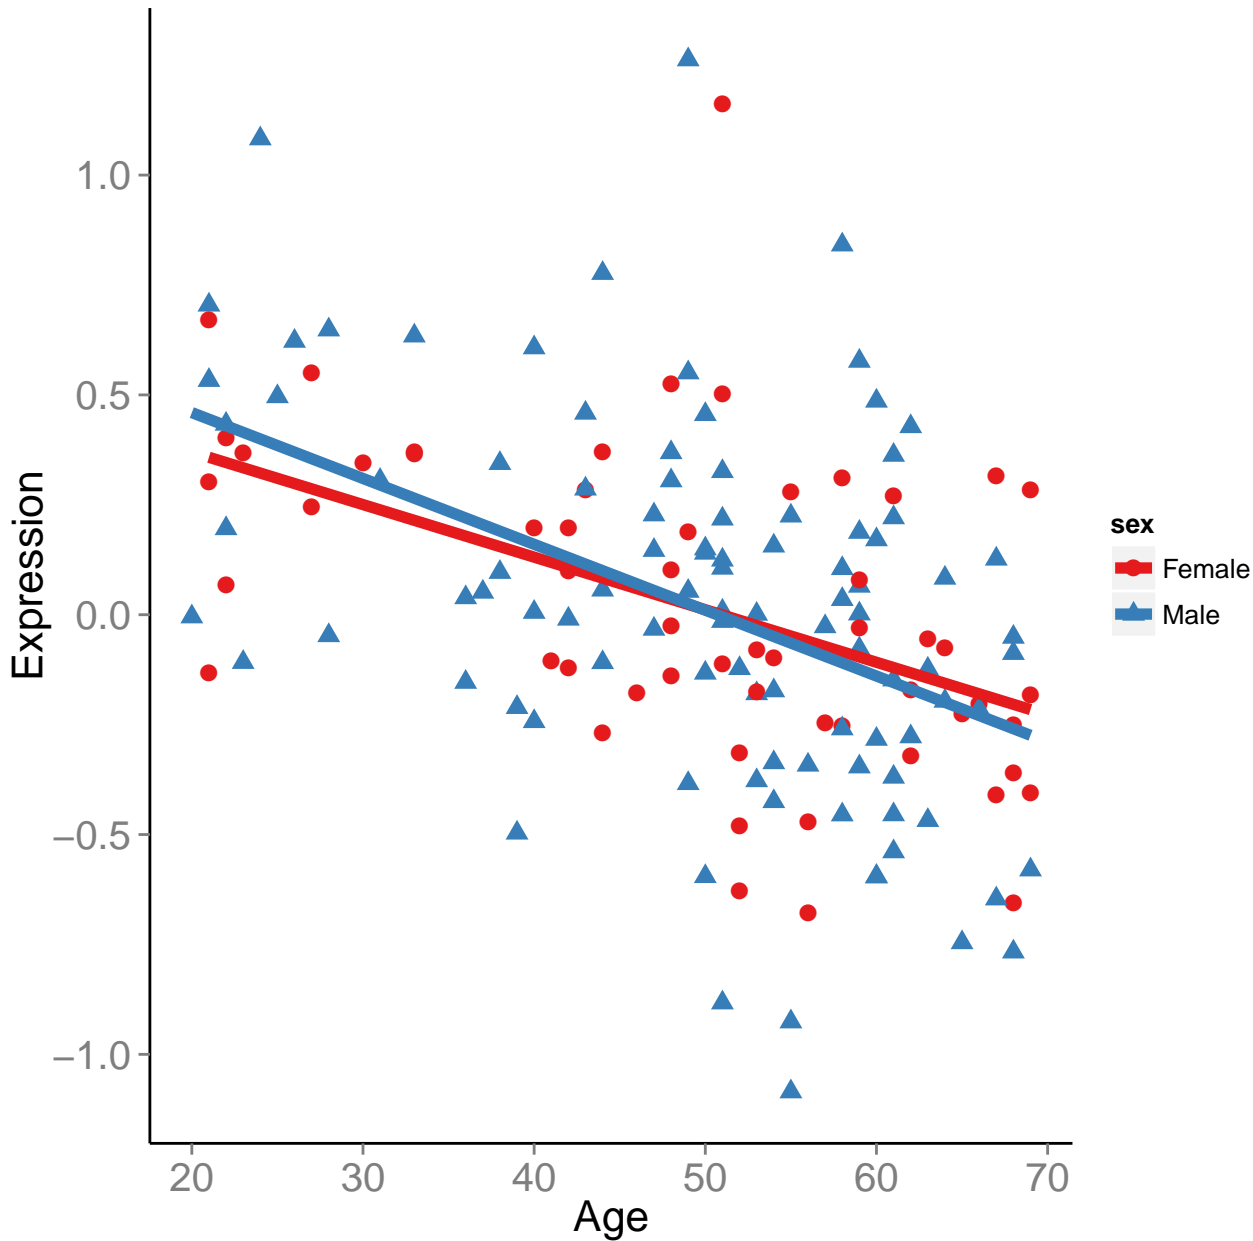



Blood: ASCC3 Pearson-R=0.45 Pval=4.39E-09

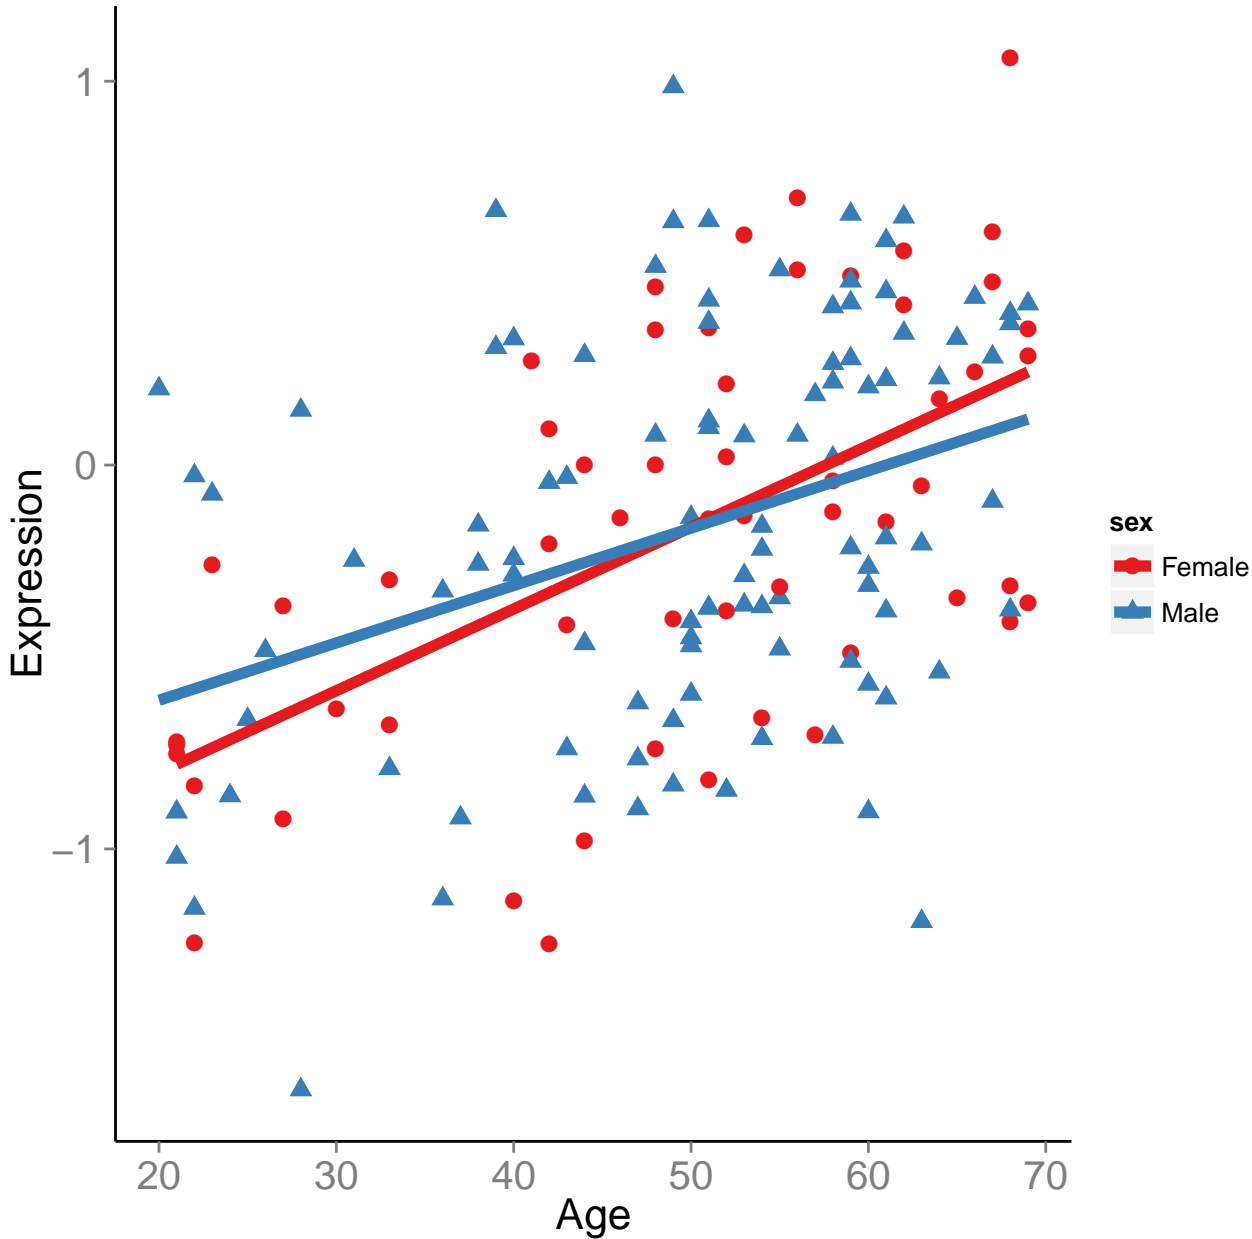

Blood: RNF170 Pearson-R=-0.45 Pval=4.74E-09

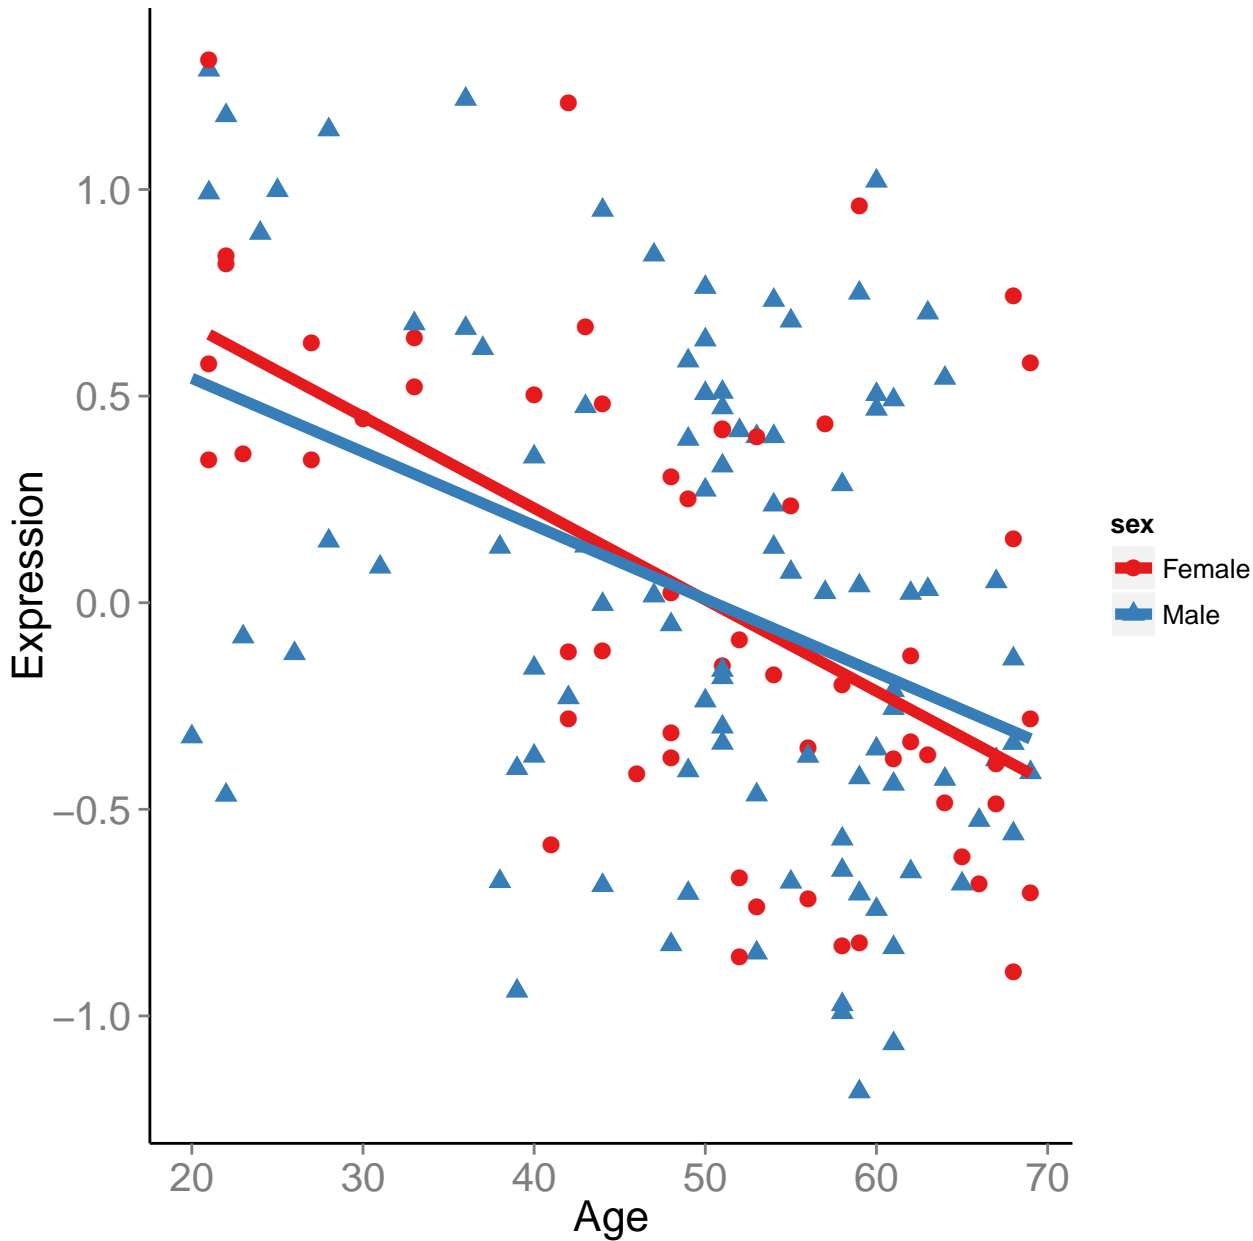

Blood: GDPD5 Pearson-R=0.45 Pval=5.78E-09

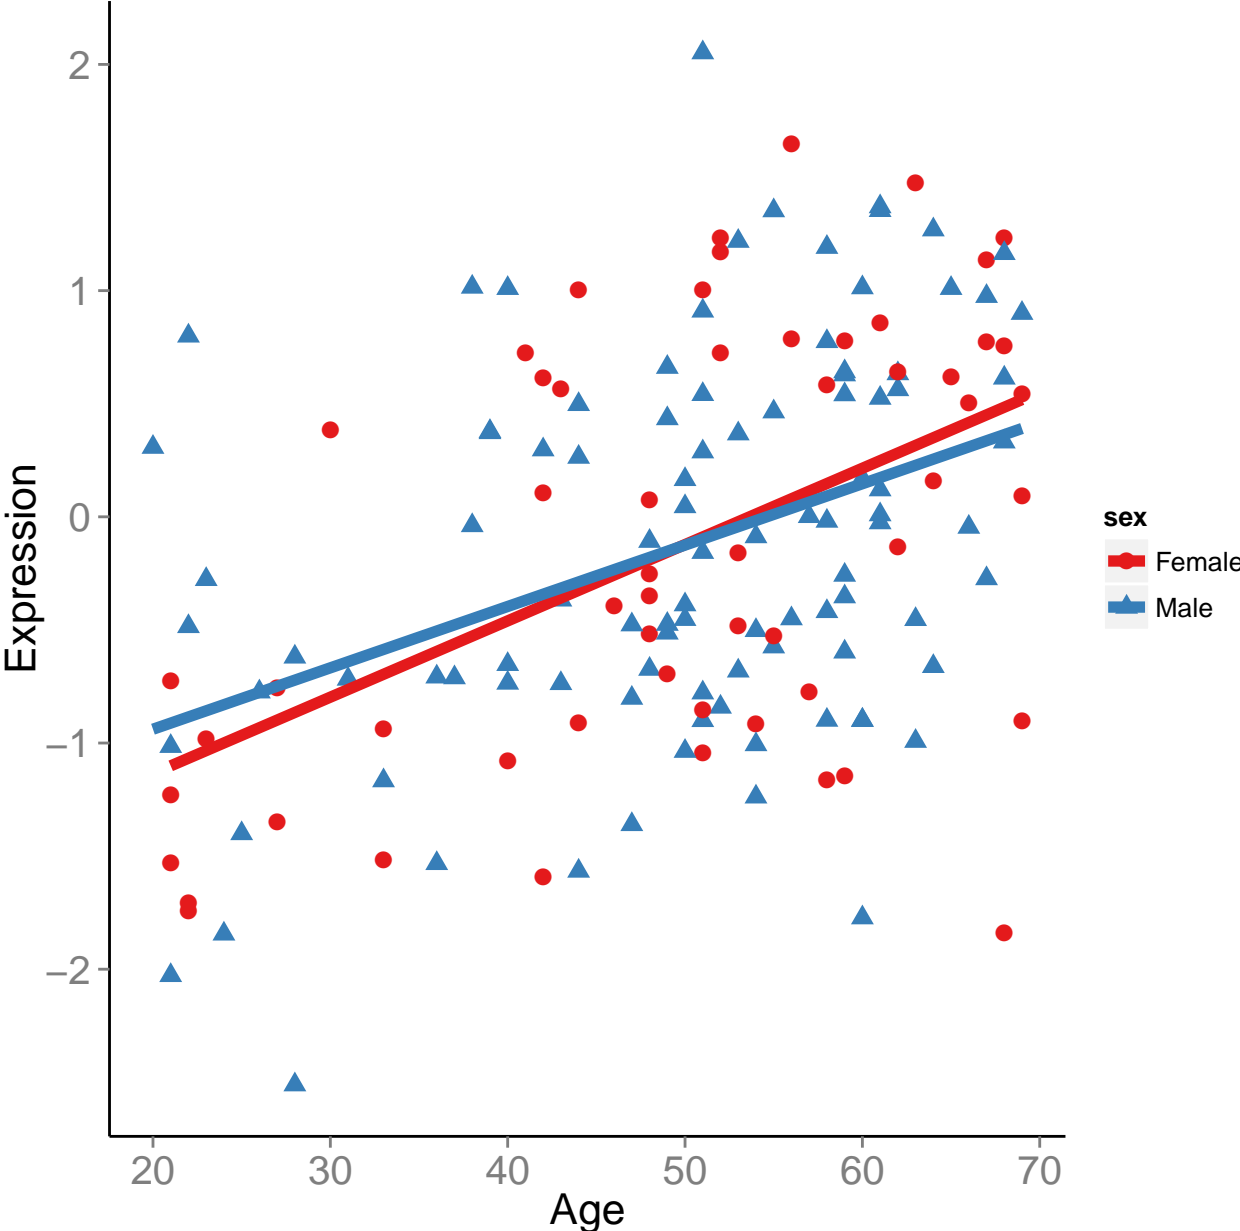

Blood: SRI Pearson-R=-0.44 Pval=7.36E-09

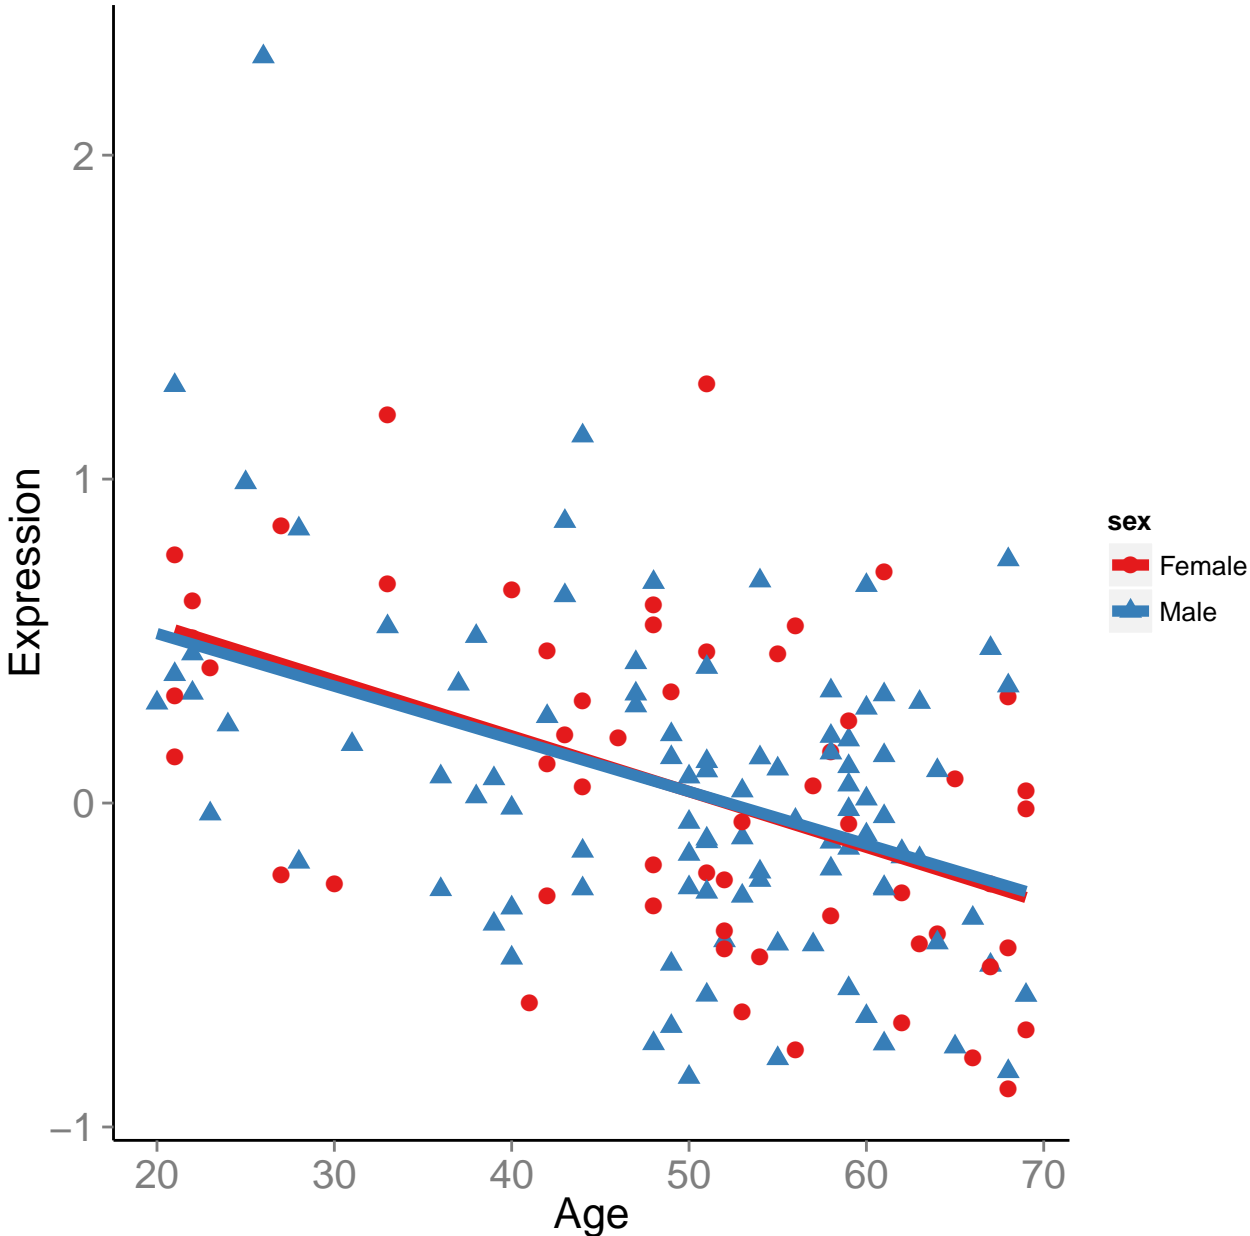

Blood: AC092535.1 Pearson-R=0.44 Pval=1.10E-08

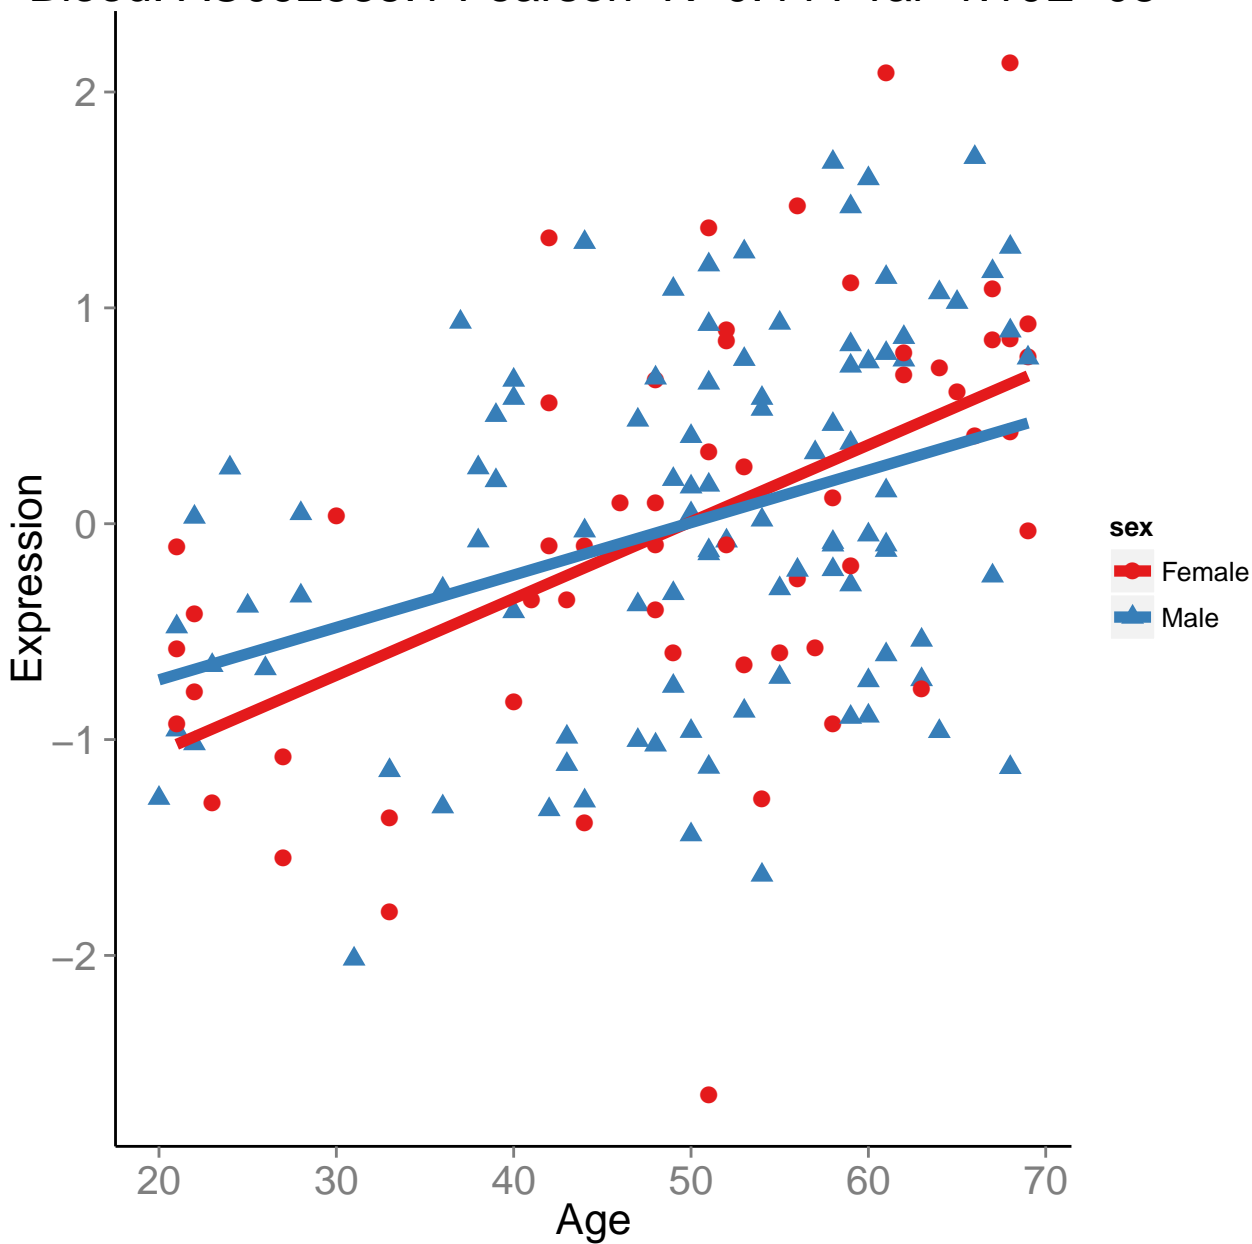

Blood: CDK7 Pearson-R=-0.44 Pval=1.17E-08

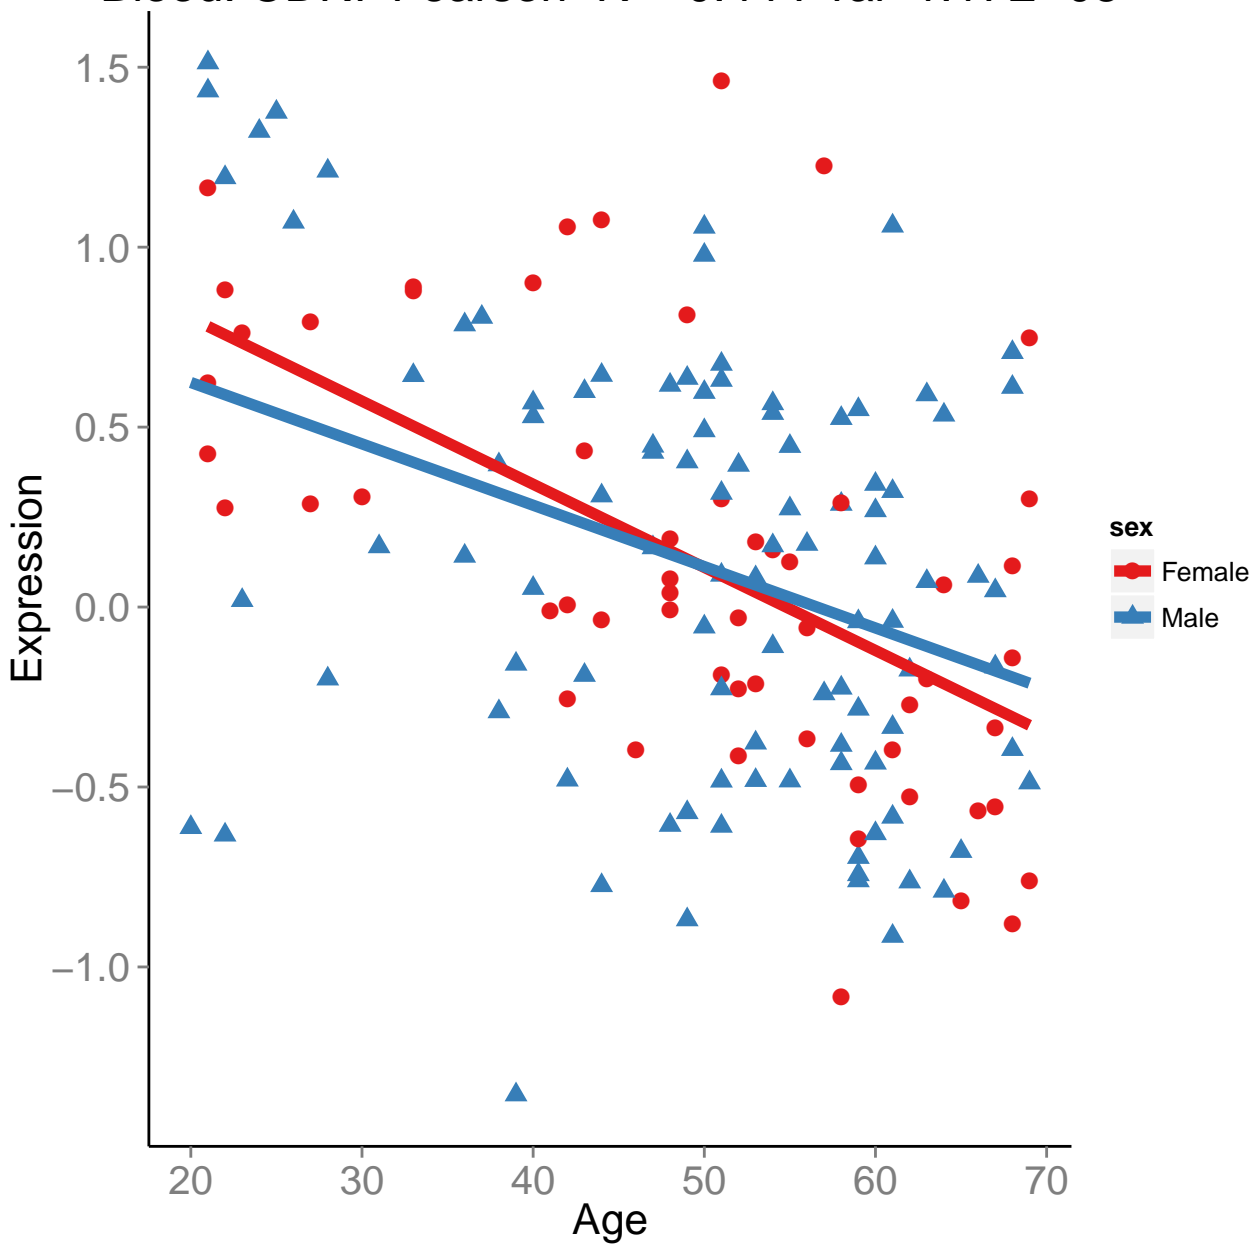

Blood: PDZD4 Pearson-R=0.43 Pval=1.68E-08

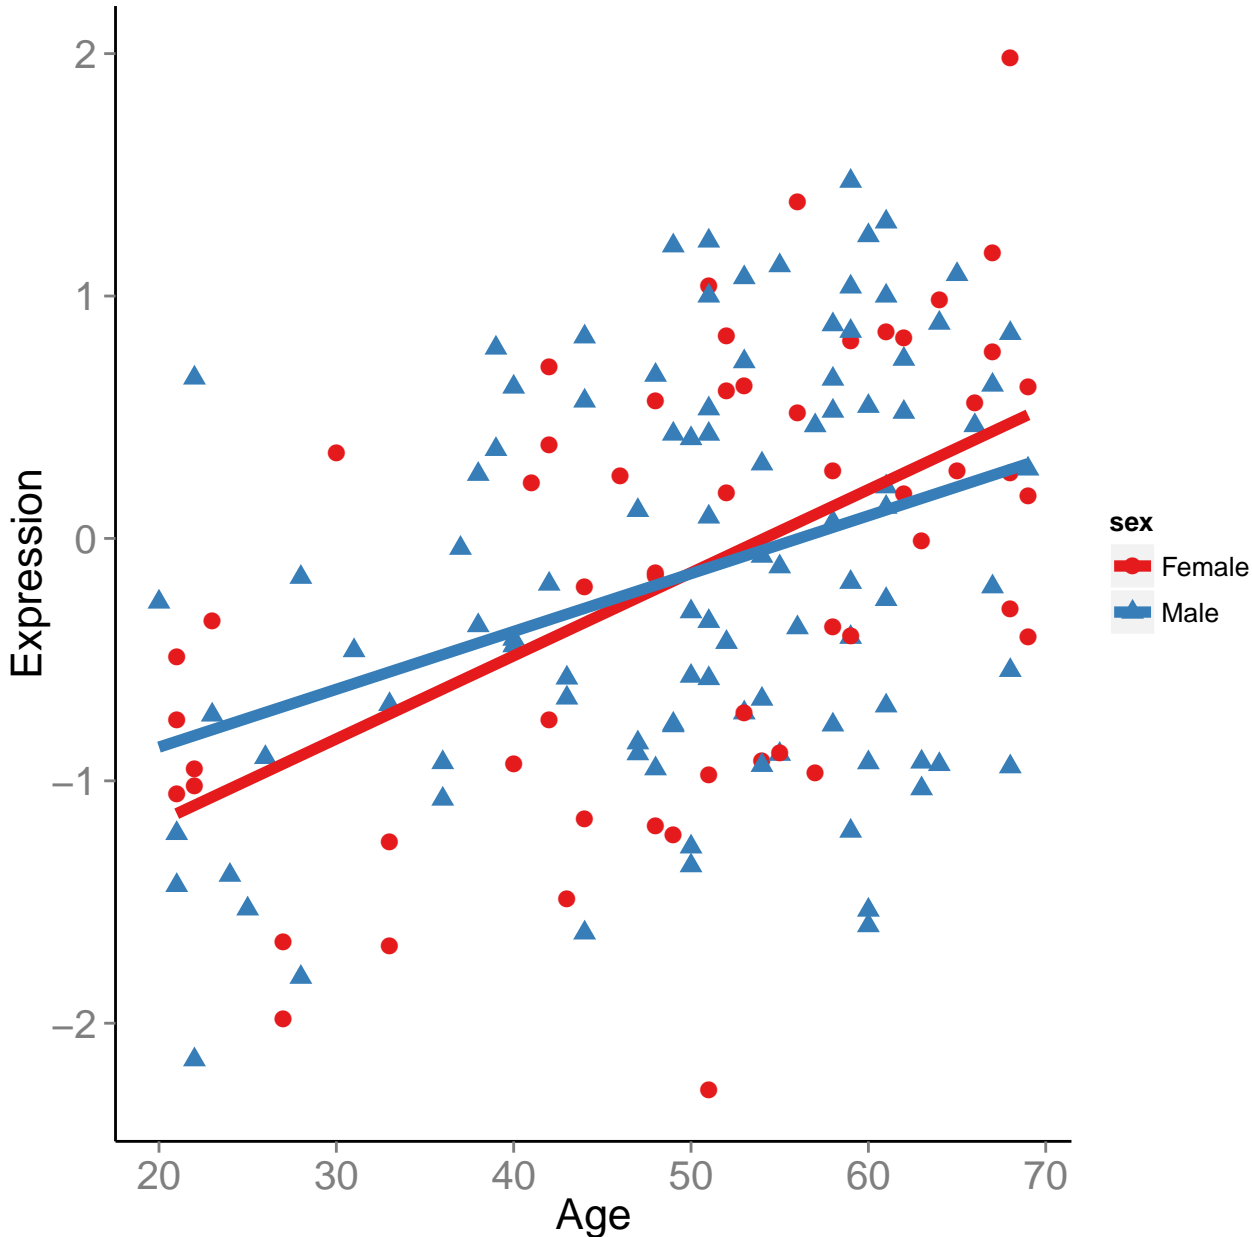

Blood: ZBTB38 Pearson-R=0.43 Pval=1.99E-08

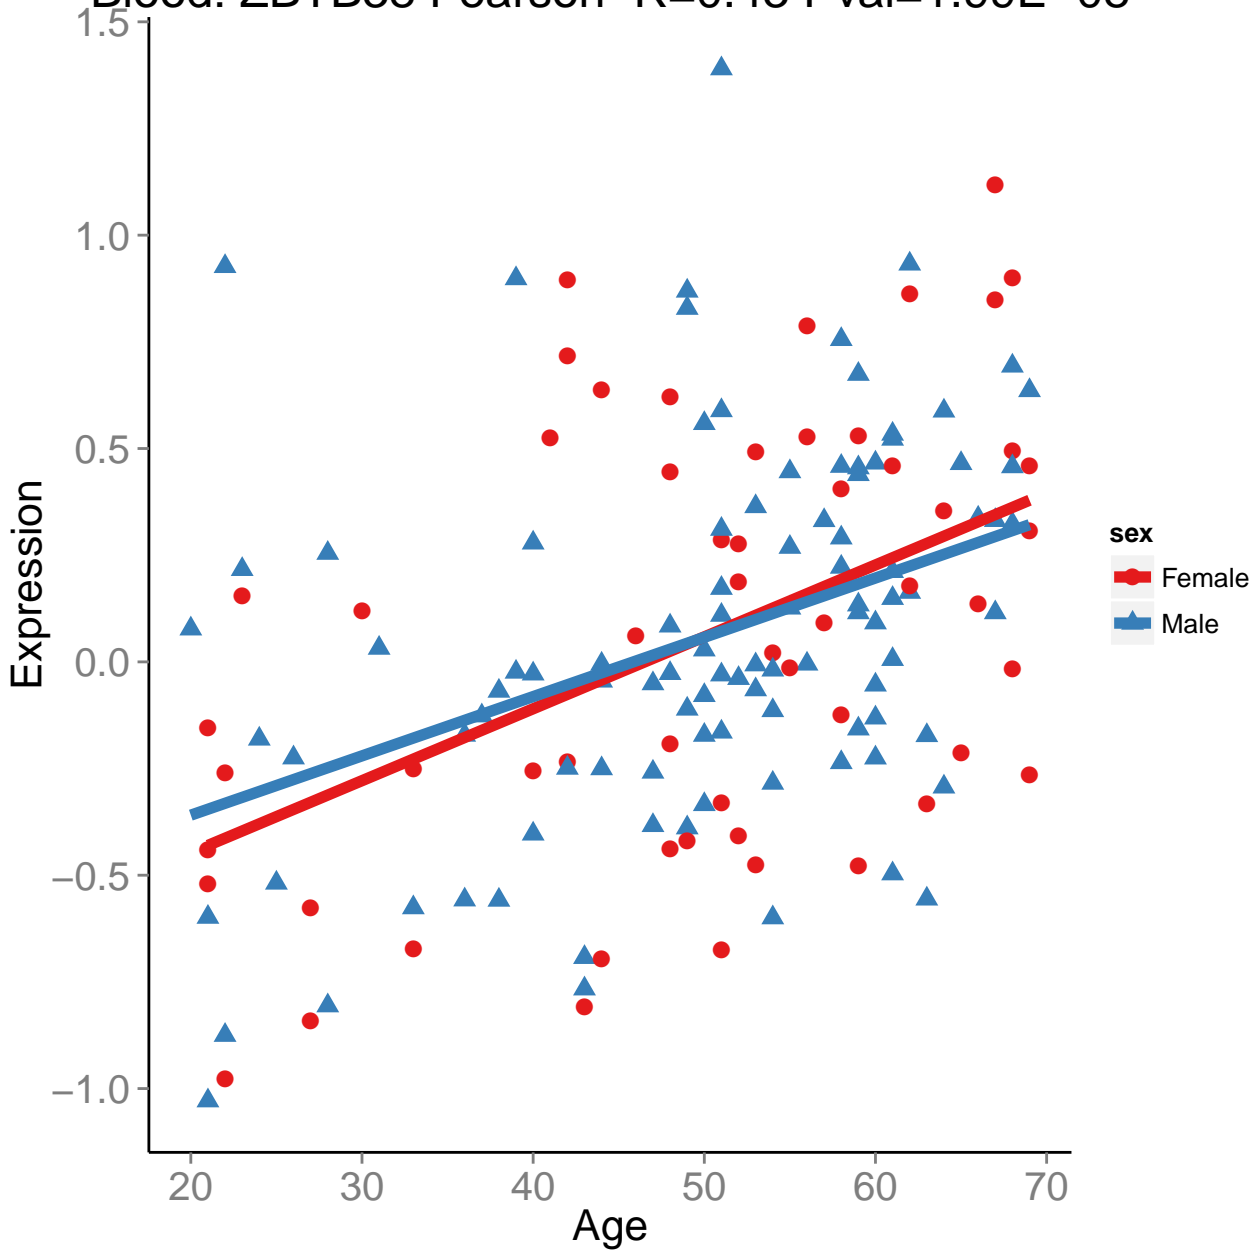



Blood: PSMC1 Pearson-R=-0.43 Pval=1.99E-08

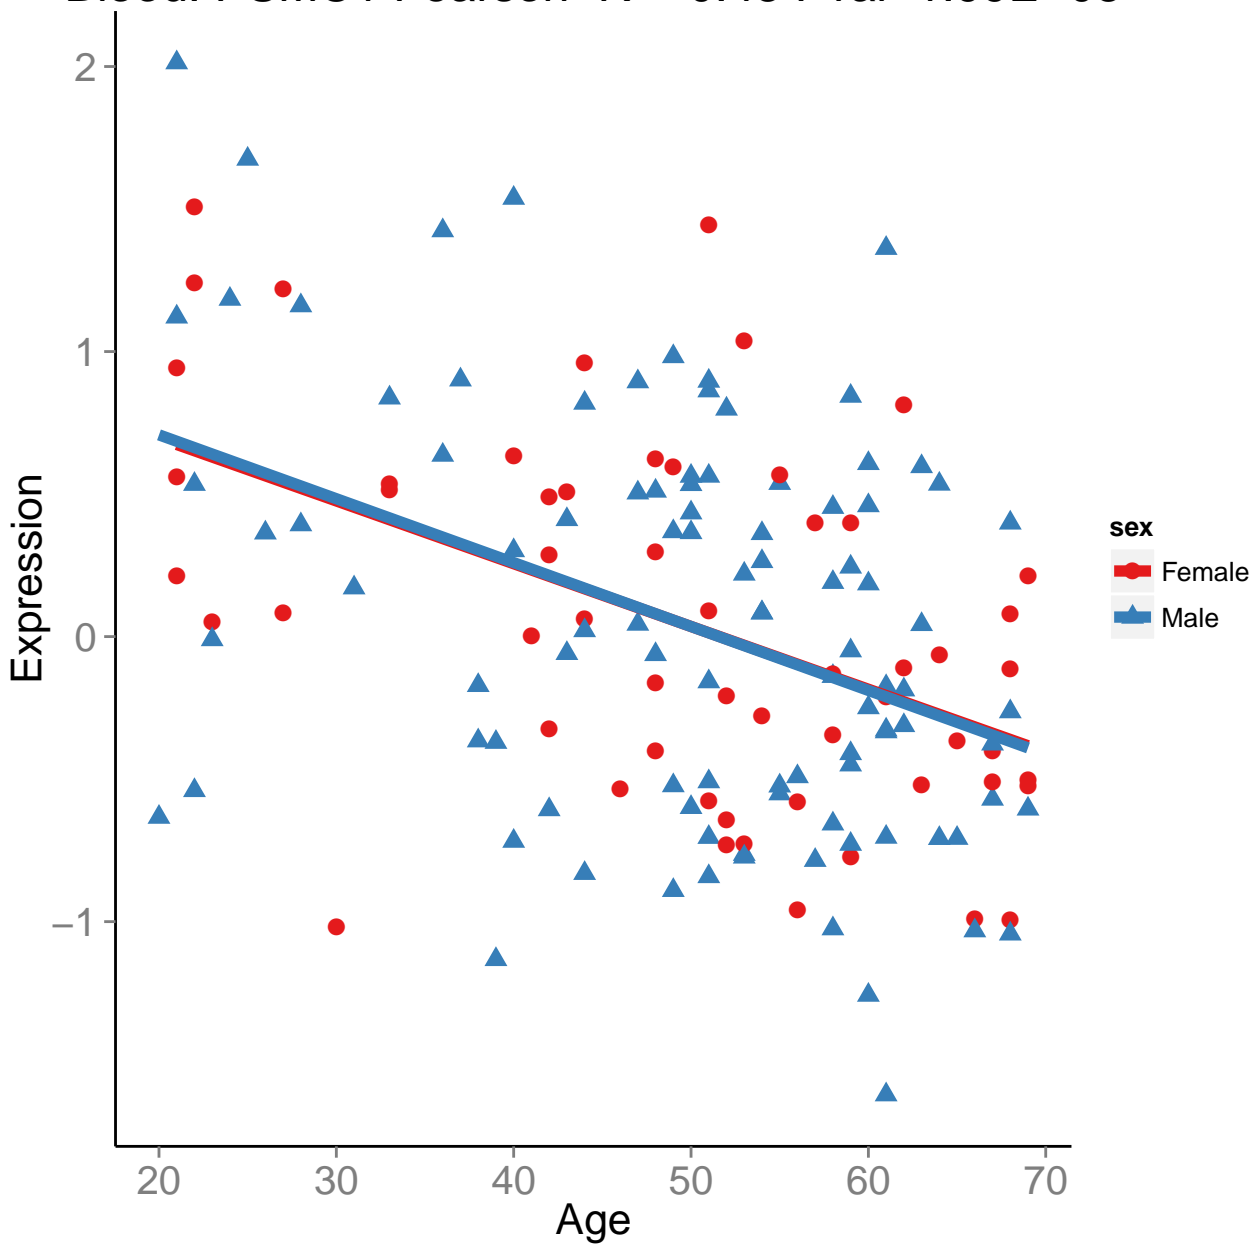

Blood: GATS Pearson-R=-0.43 Pval=1.97E-08

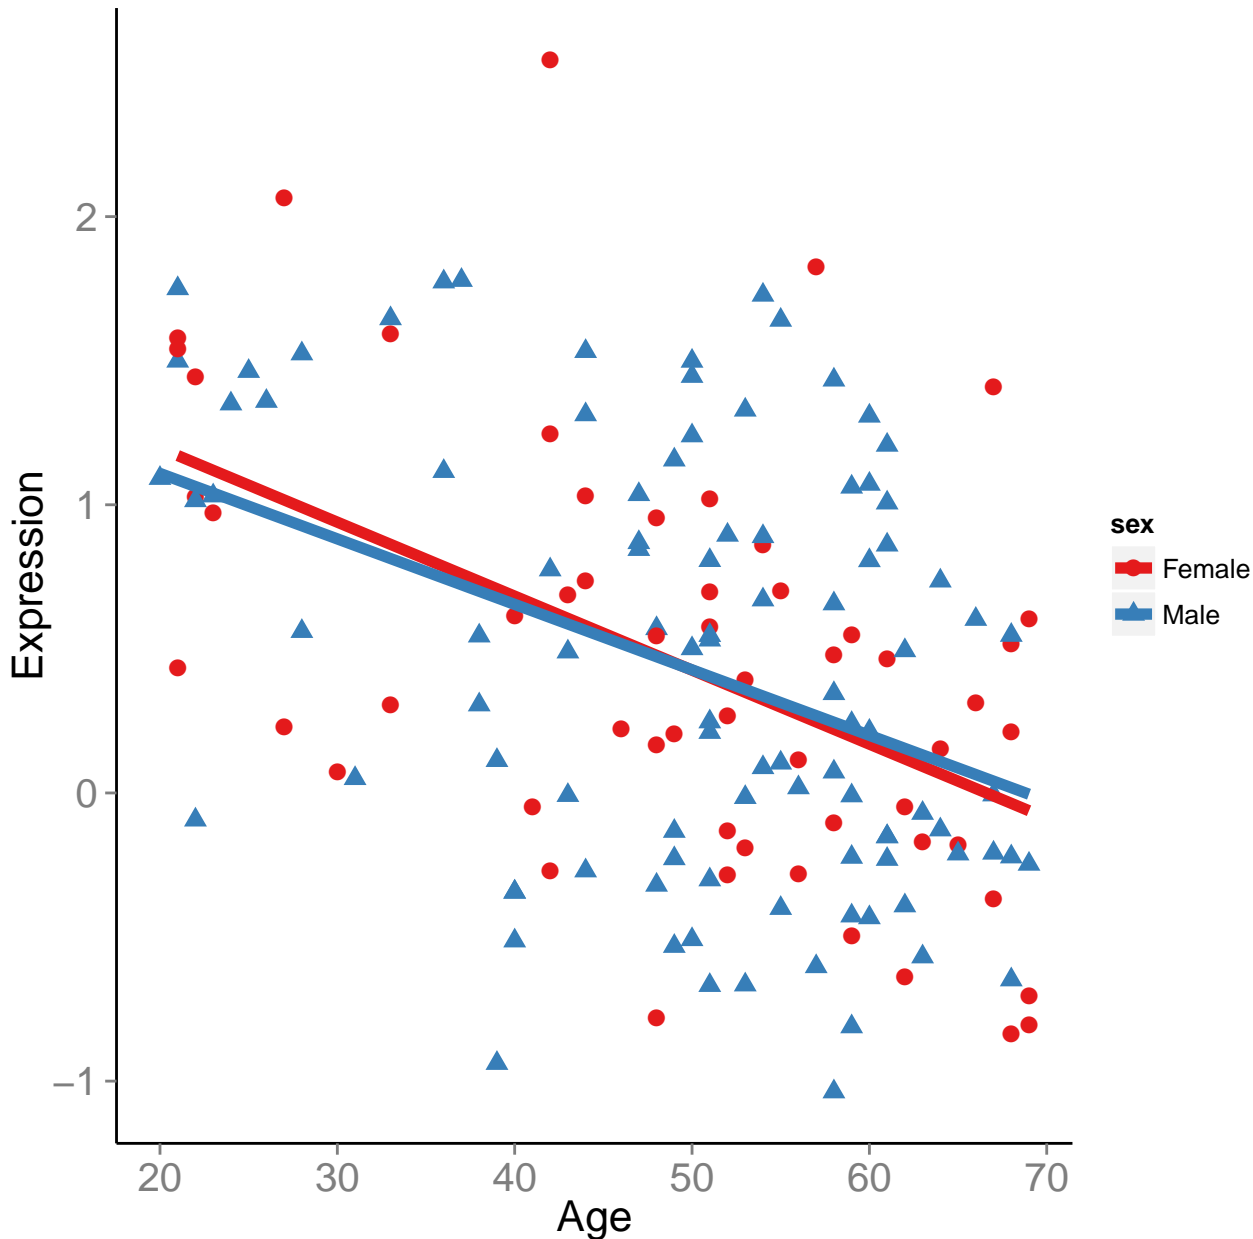

Blood: ANKRD13A Pearson-R=-0.43 Pval=1.66E-08

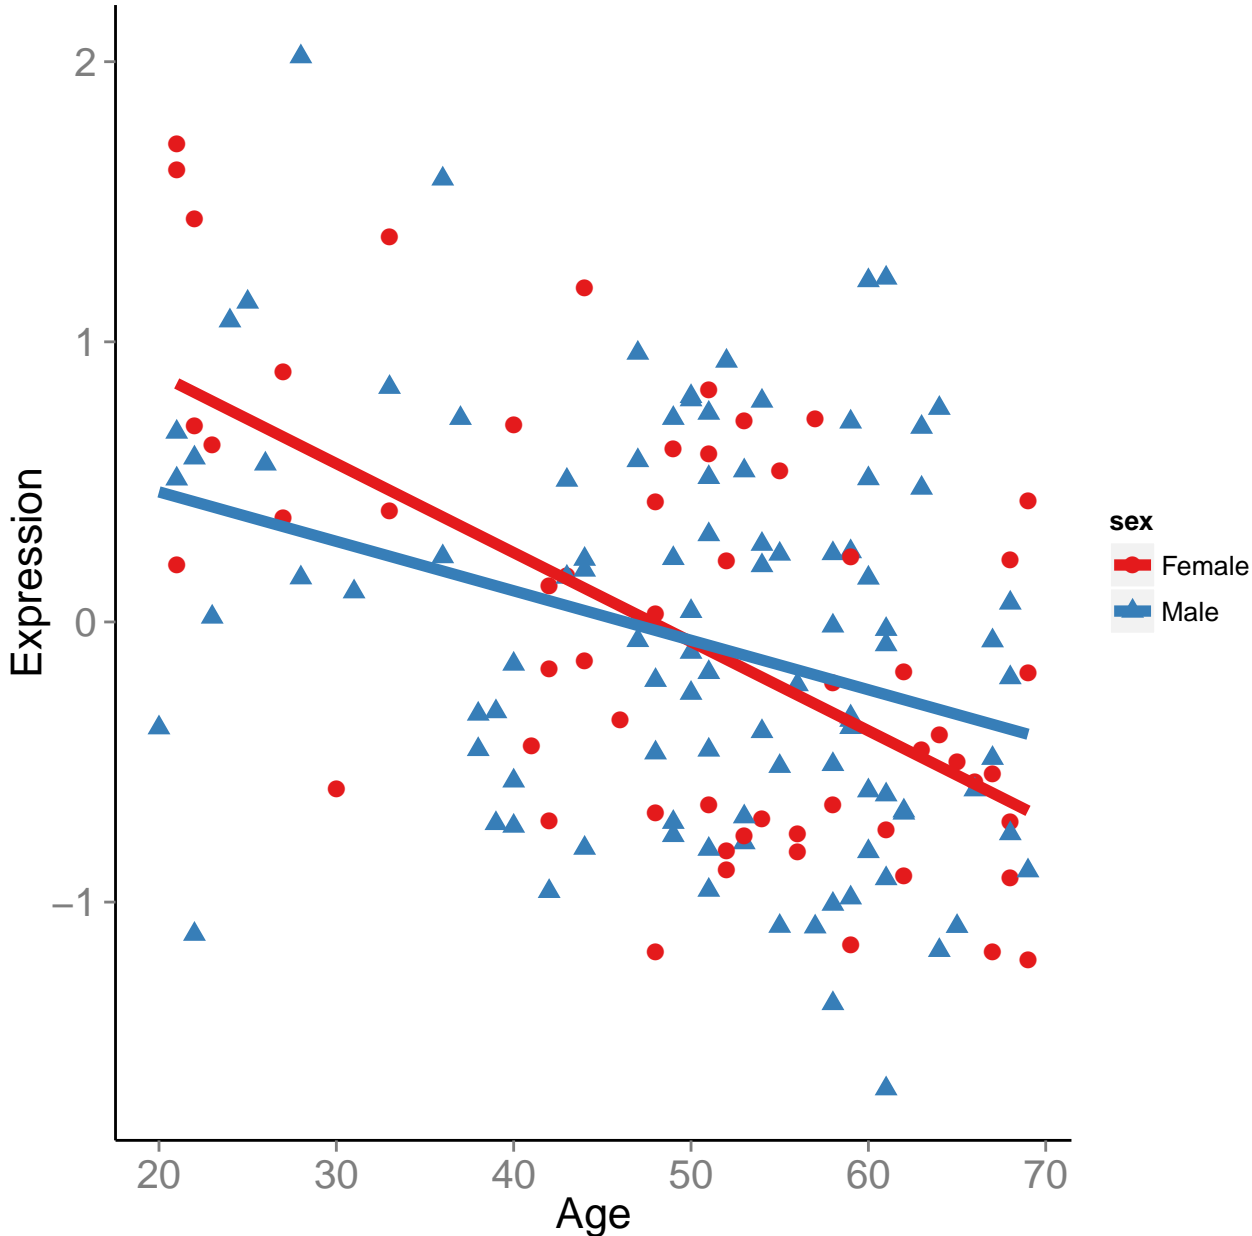

Blood: AUP1 Pearson-R=0.43 Pval=2.20E-08

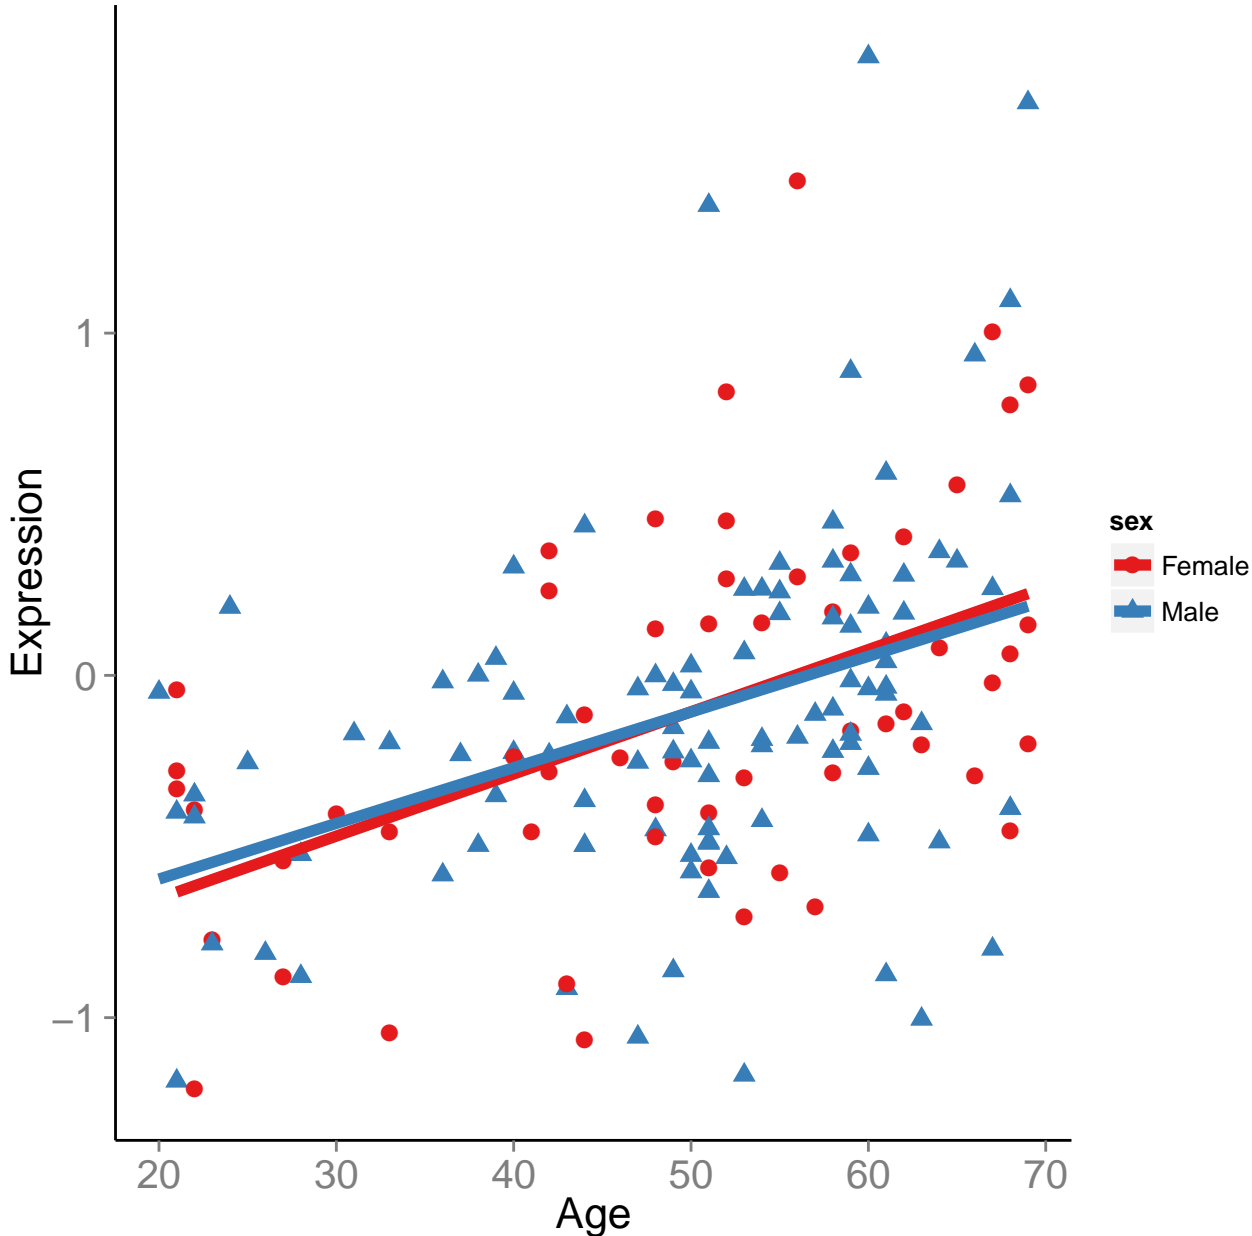

Blood: FAM101B Pearson-R=-0.43 Pval=2.52E-08

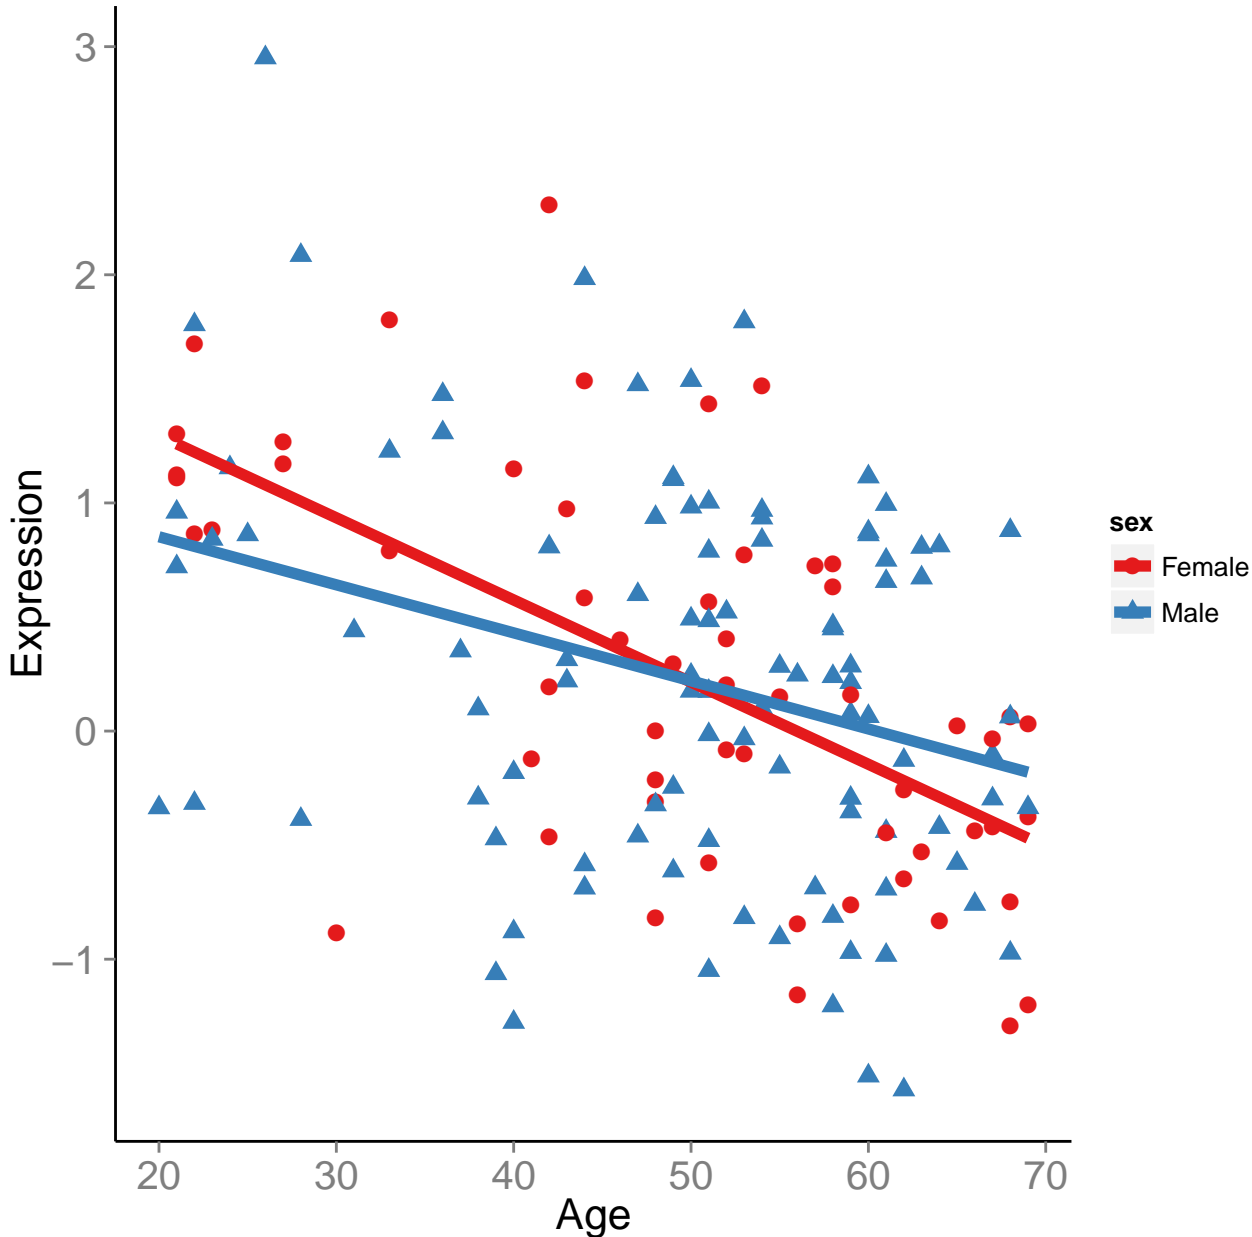

Blood: CCZ1 Pearson-R=-0.43 Pval=2.55E-08

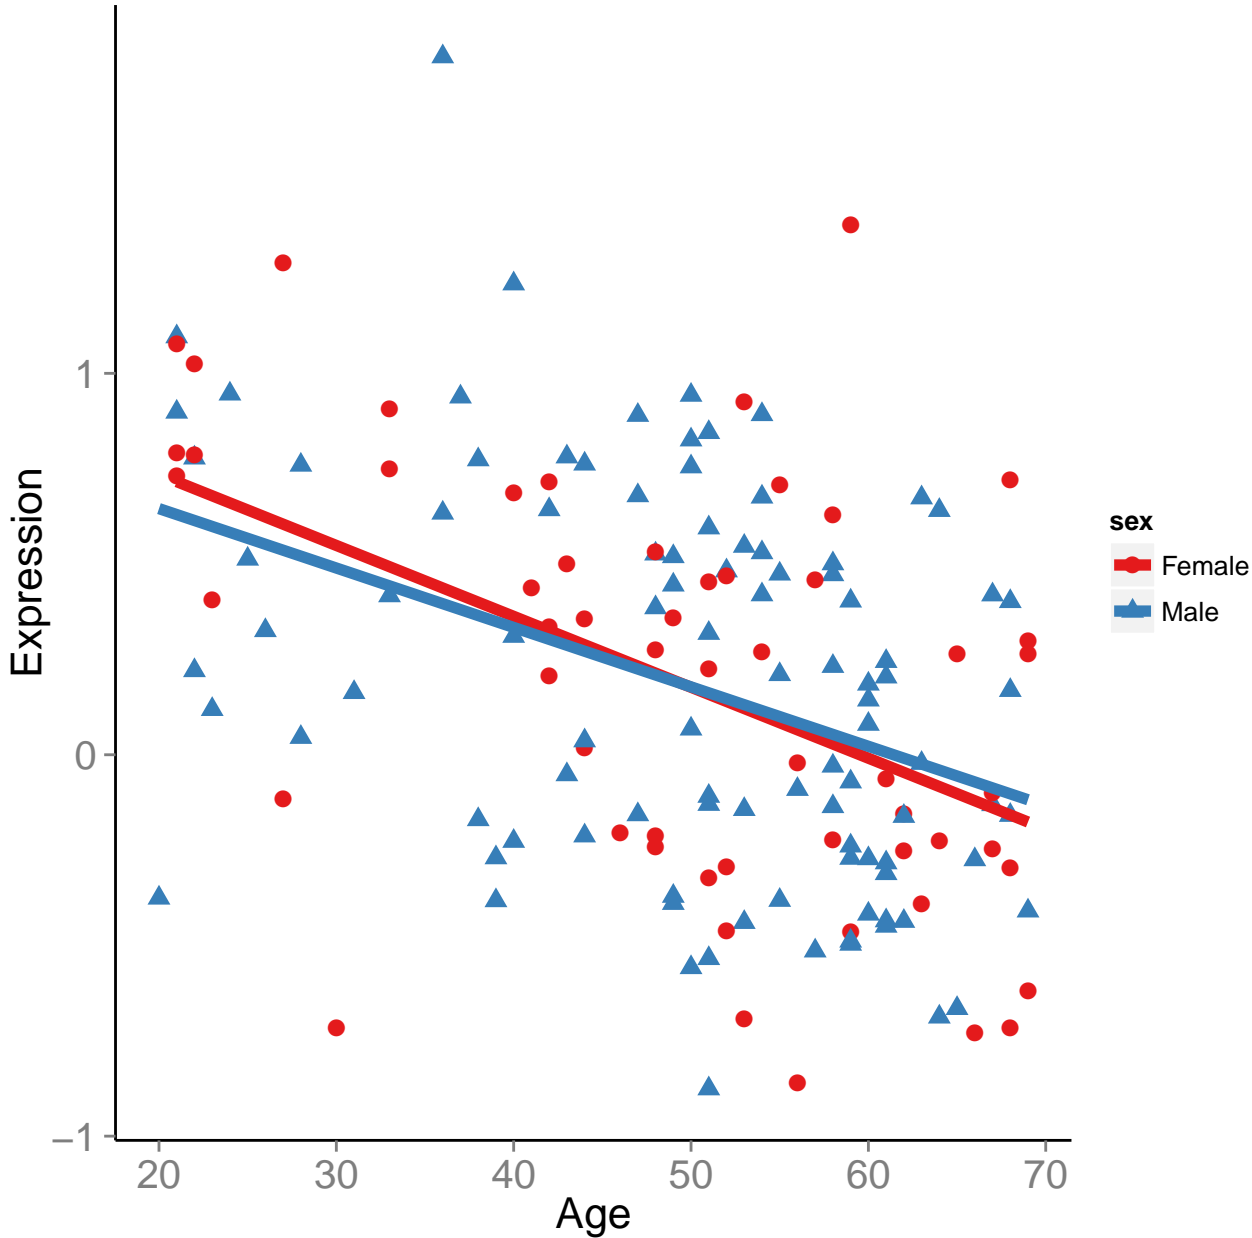

Blood: PSMC1P1 Pearson-R=-0.43 Pval=3.02E-08

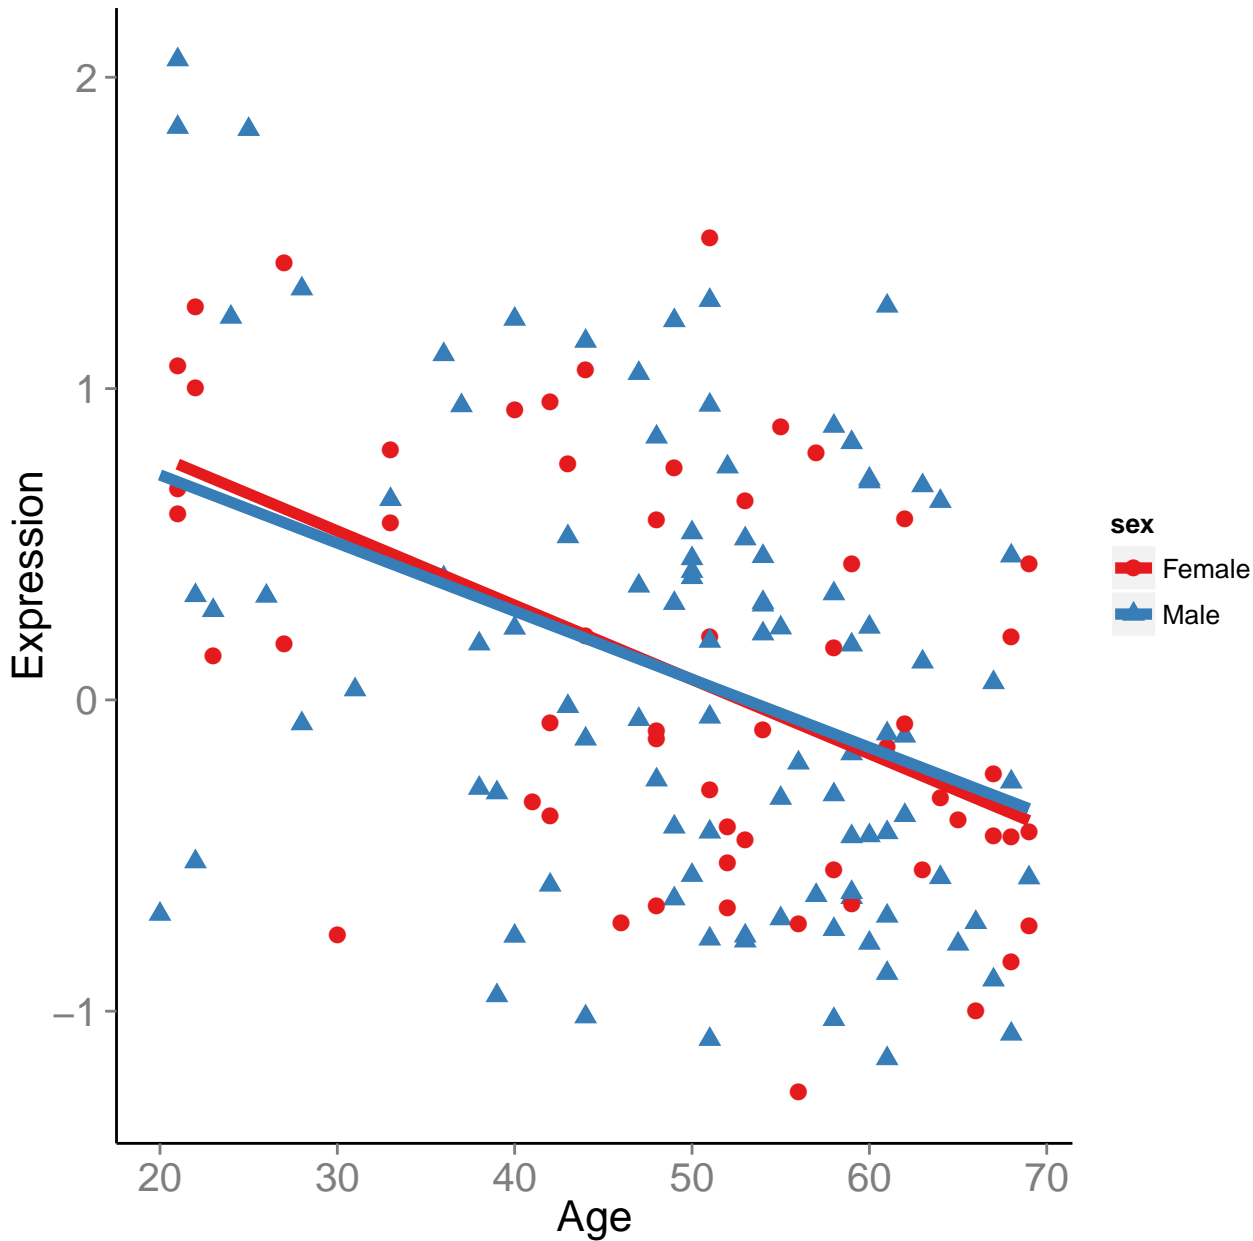

Blood: COMMD10 Pearson-R=0.42 Pval=3.52E-08

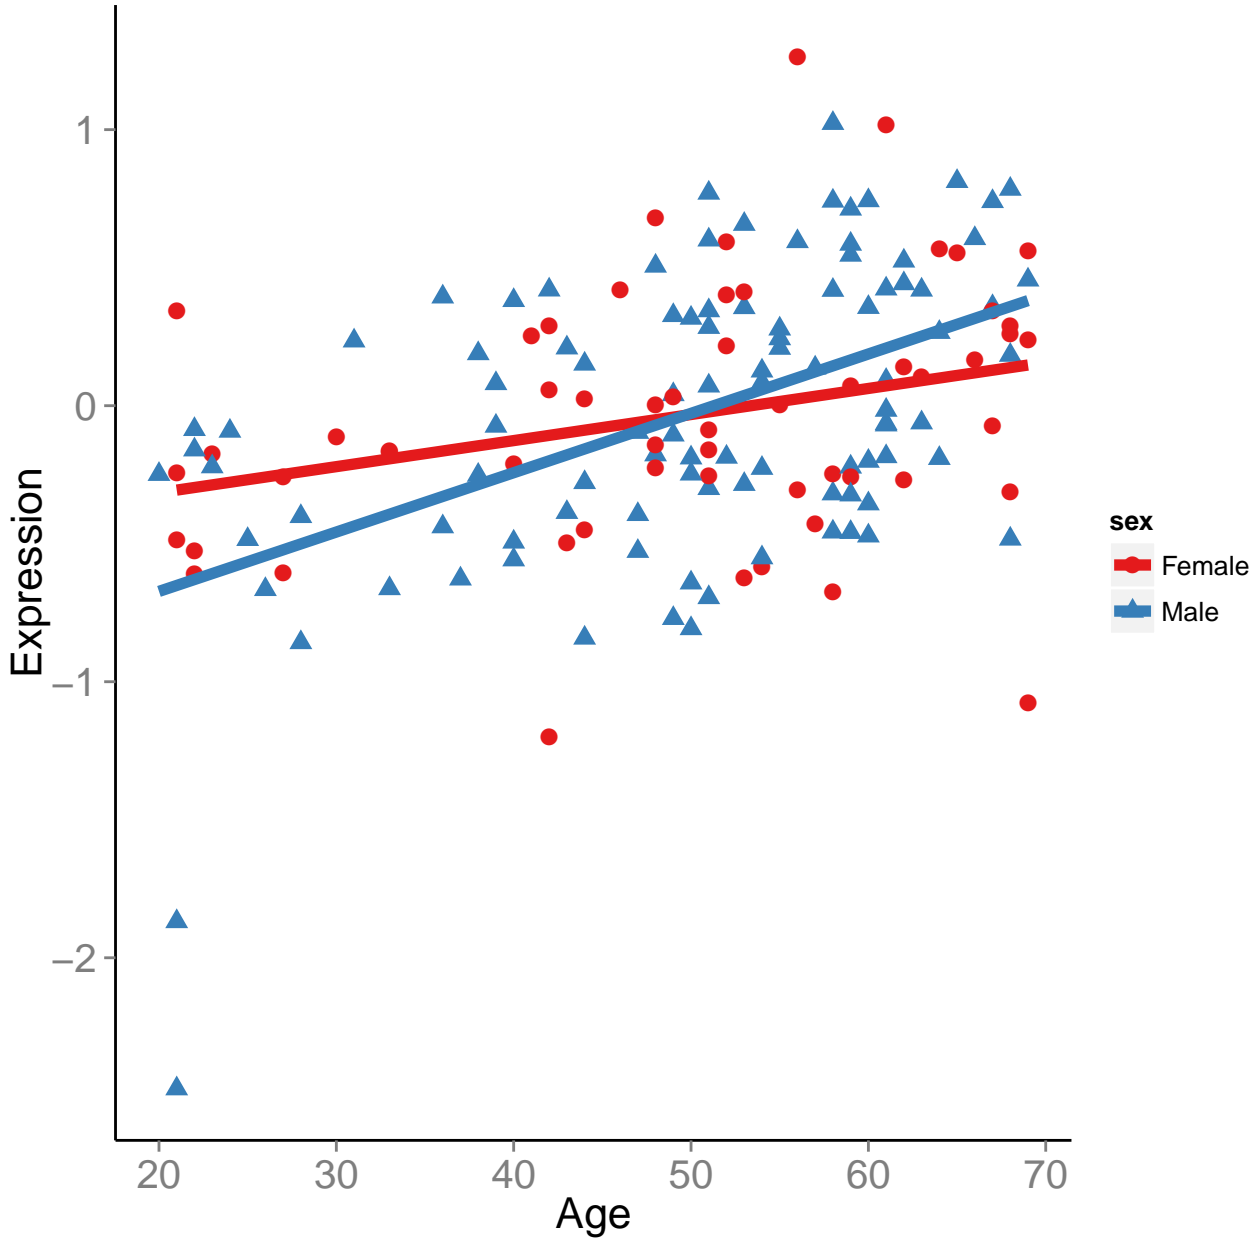



Blood: ERP27 Pearson-R=-0.42 Pval=4.21E-08

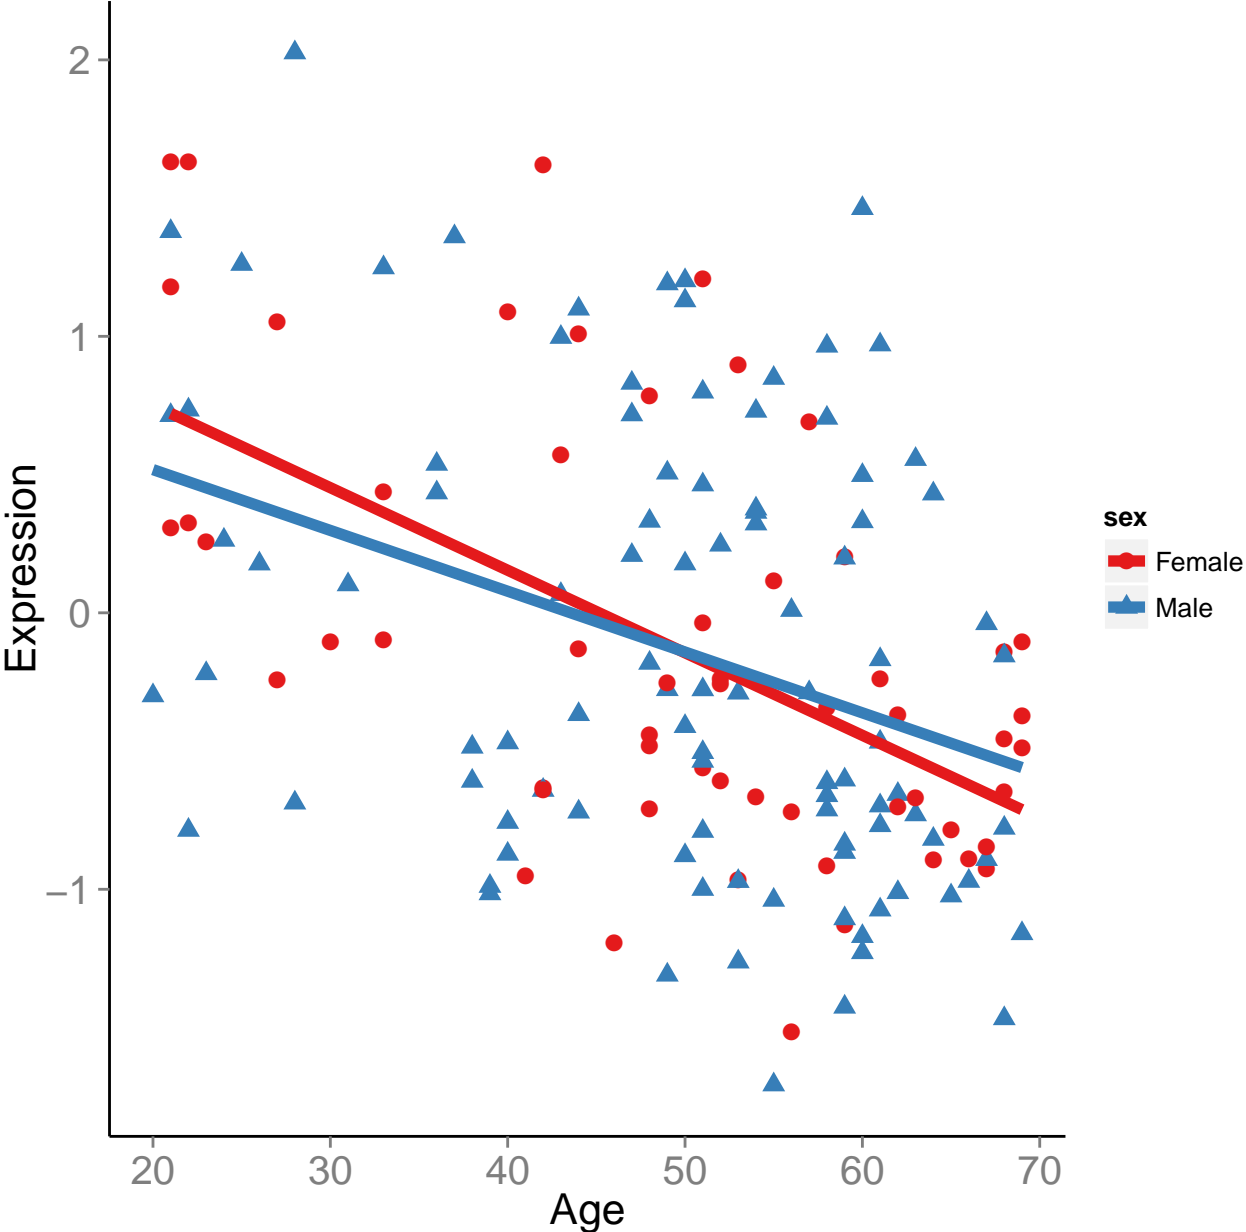

Blood: SLC1A7 Pearson-R=0.42 Pval=5.69E-08

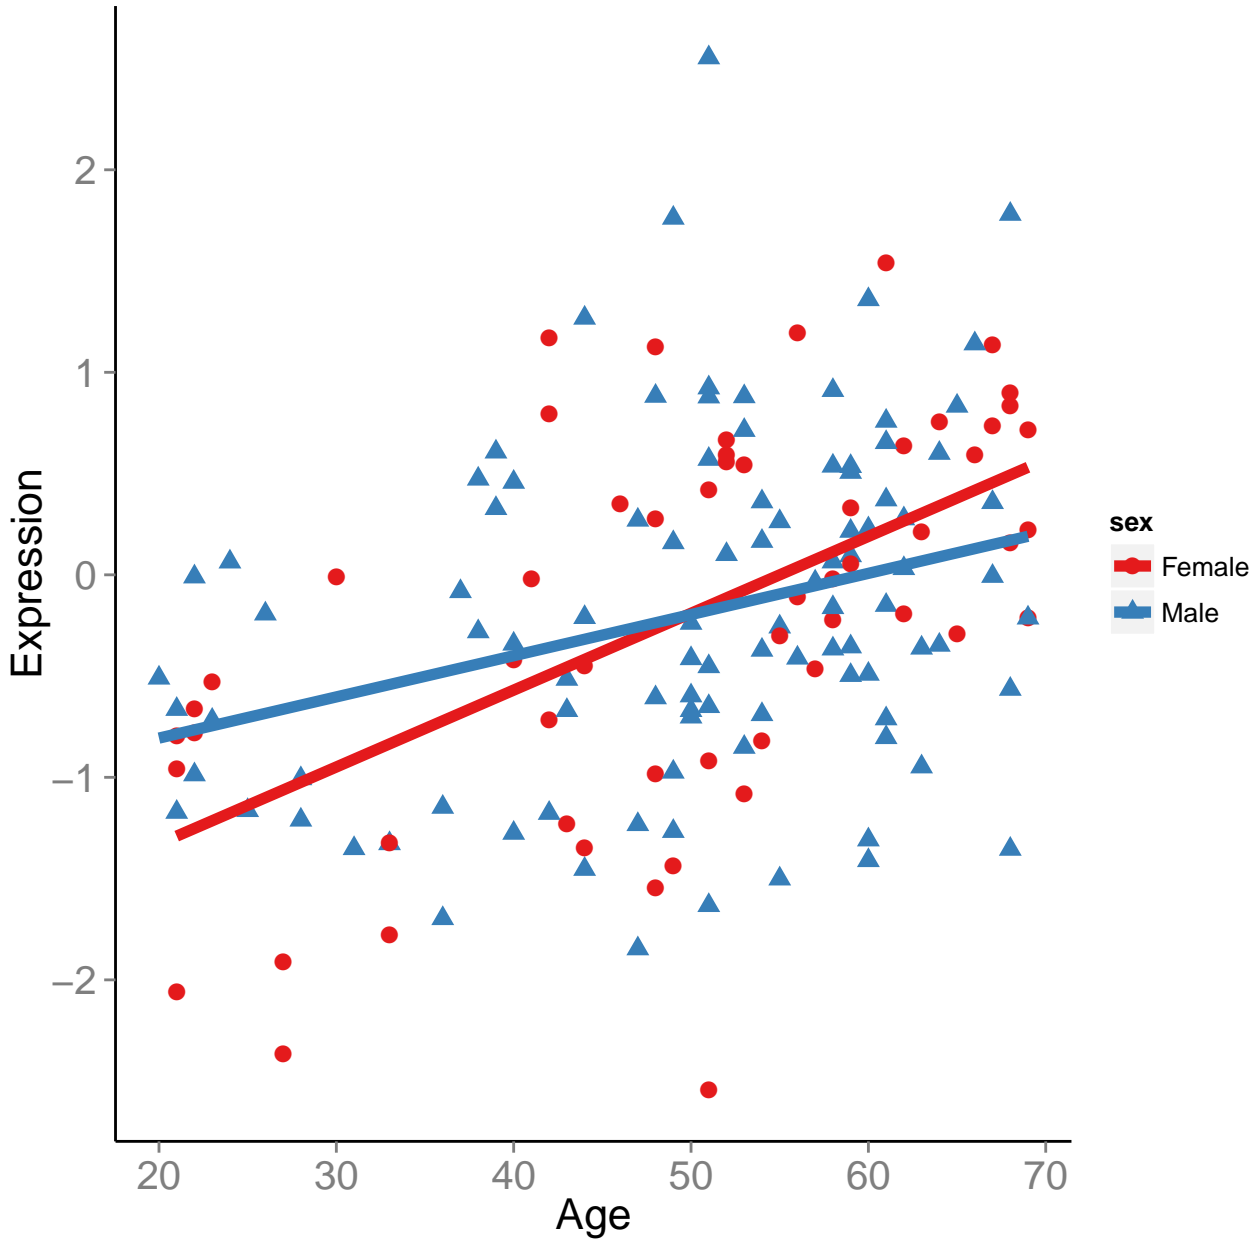

Blood: PIEZO1 Pearson-R=0.42 Pval=5.92E-08

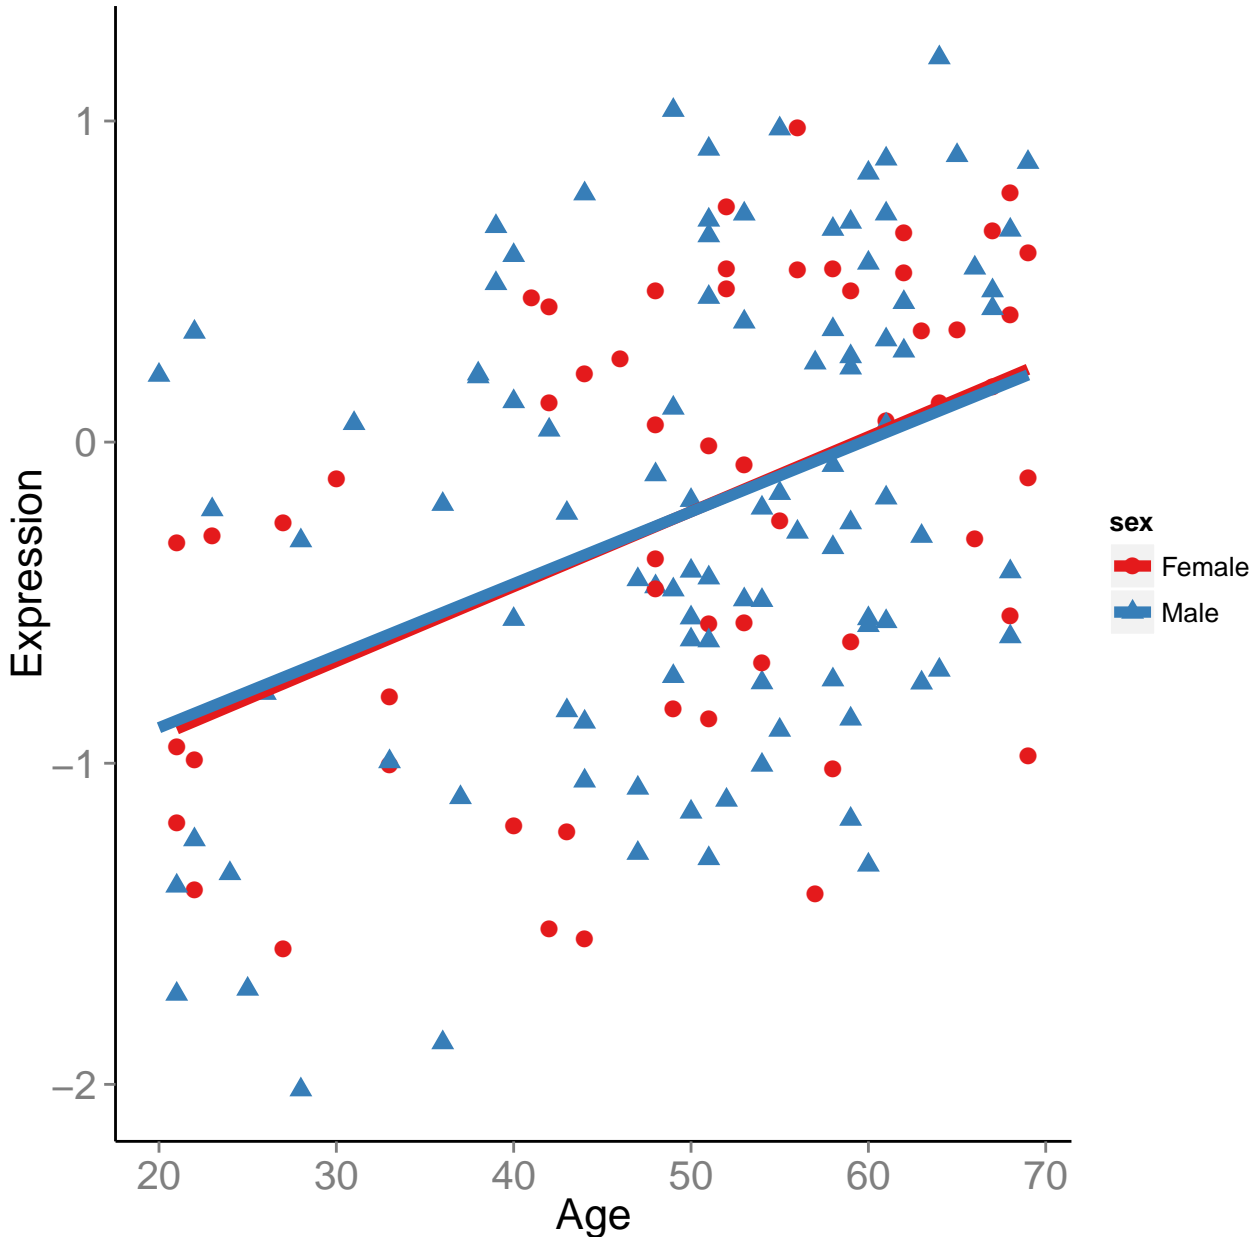

Blood: RP11-229P13.19 Pearson-R=0.42 Pval=5.98E-08

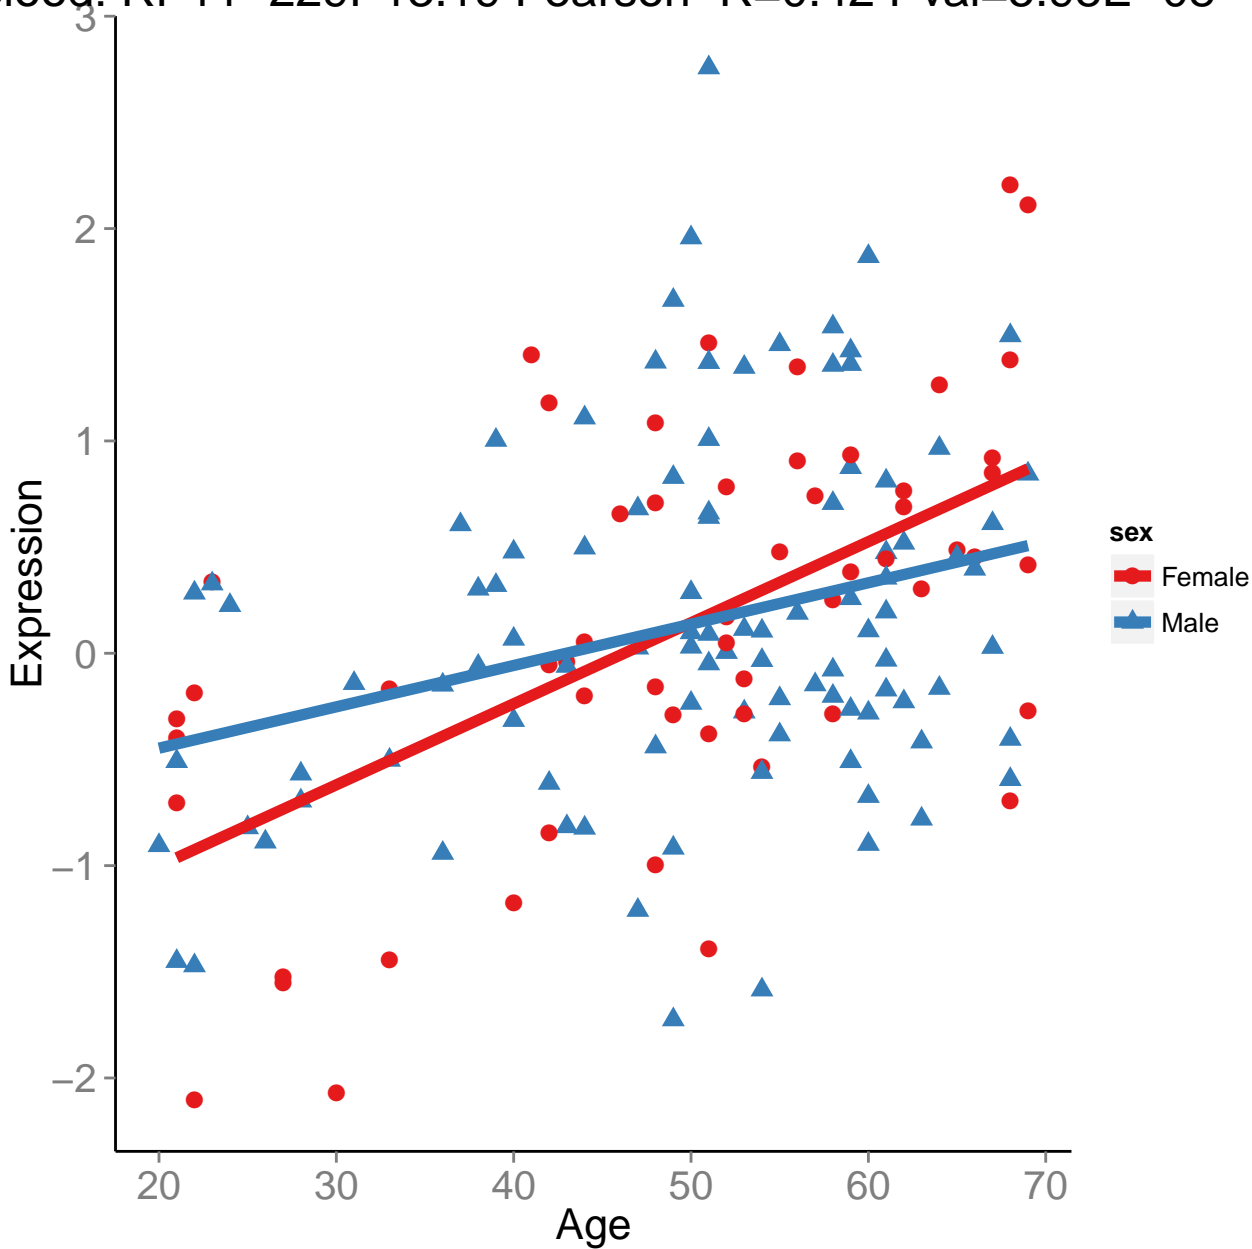

Blood: PHPT1 Pearson-R=0.42 Pval=5.75E-08

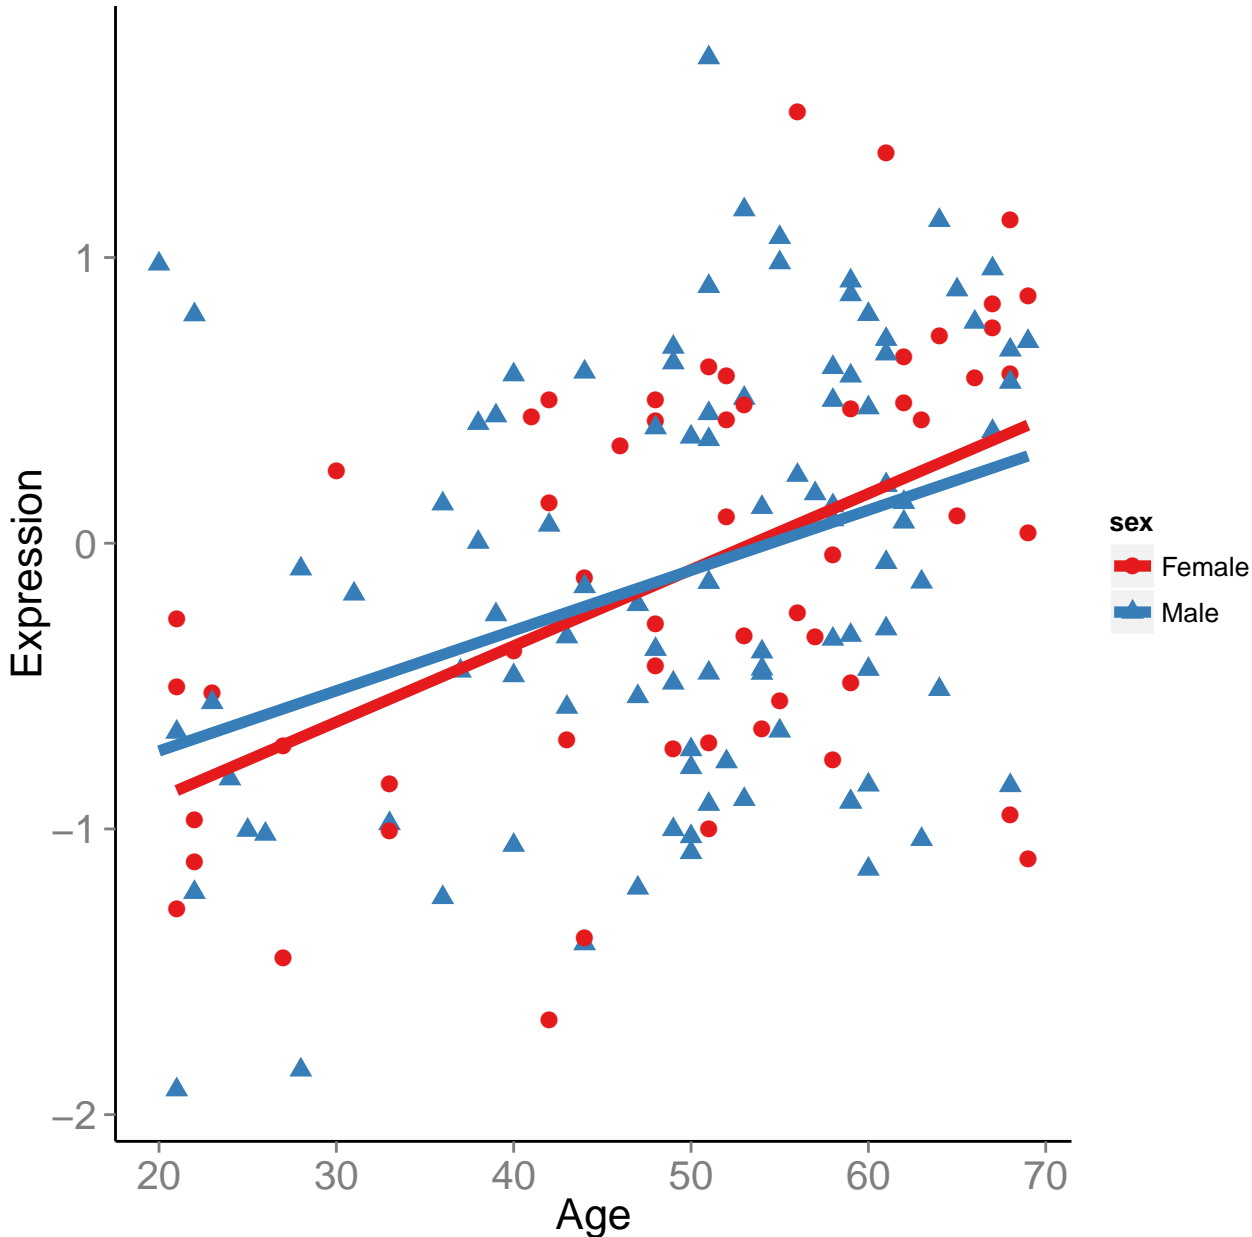

Blood: MYBL1 Pearson-R=0.42 Pval=5.42E-08

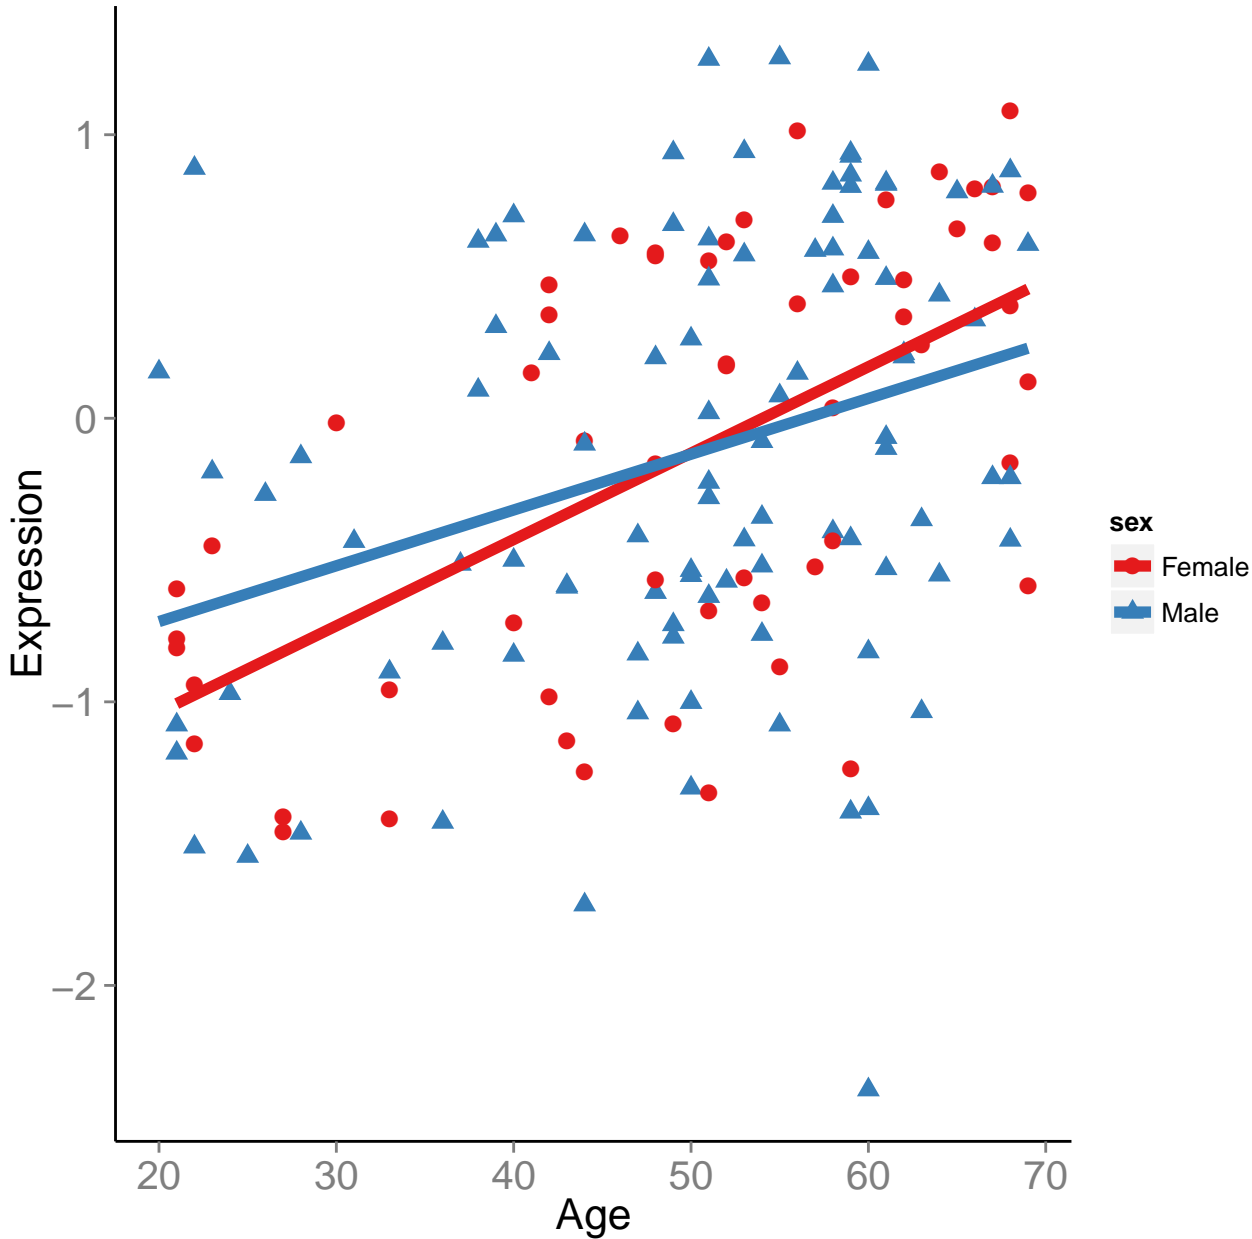

Blood: RGS9 Pearson-R=0.42 Pval=6.22E-08

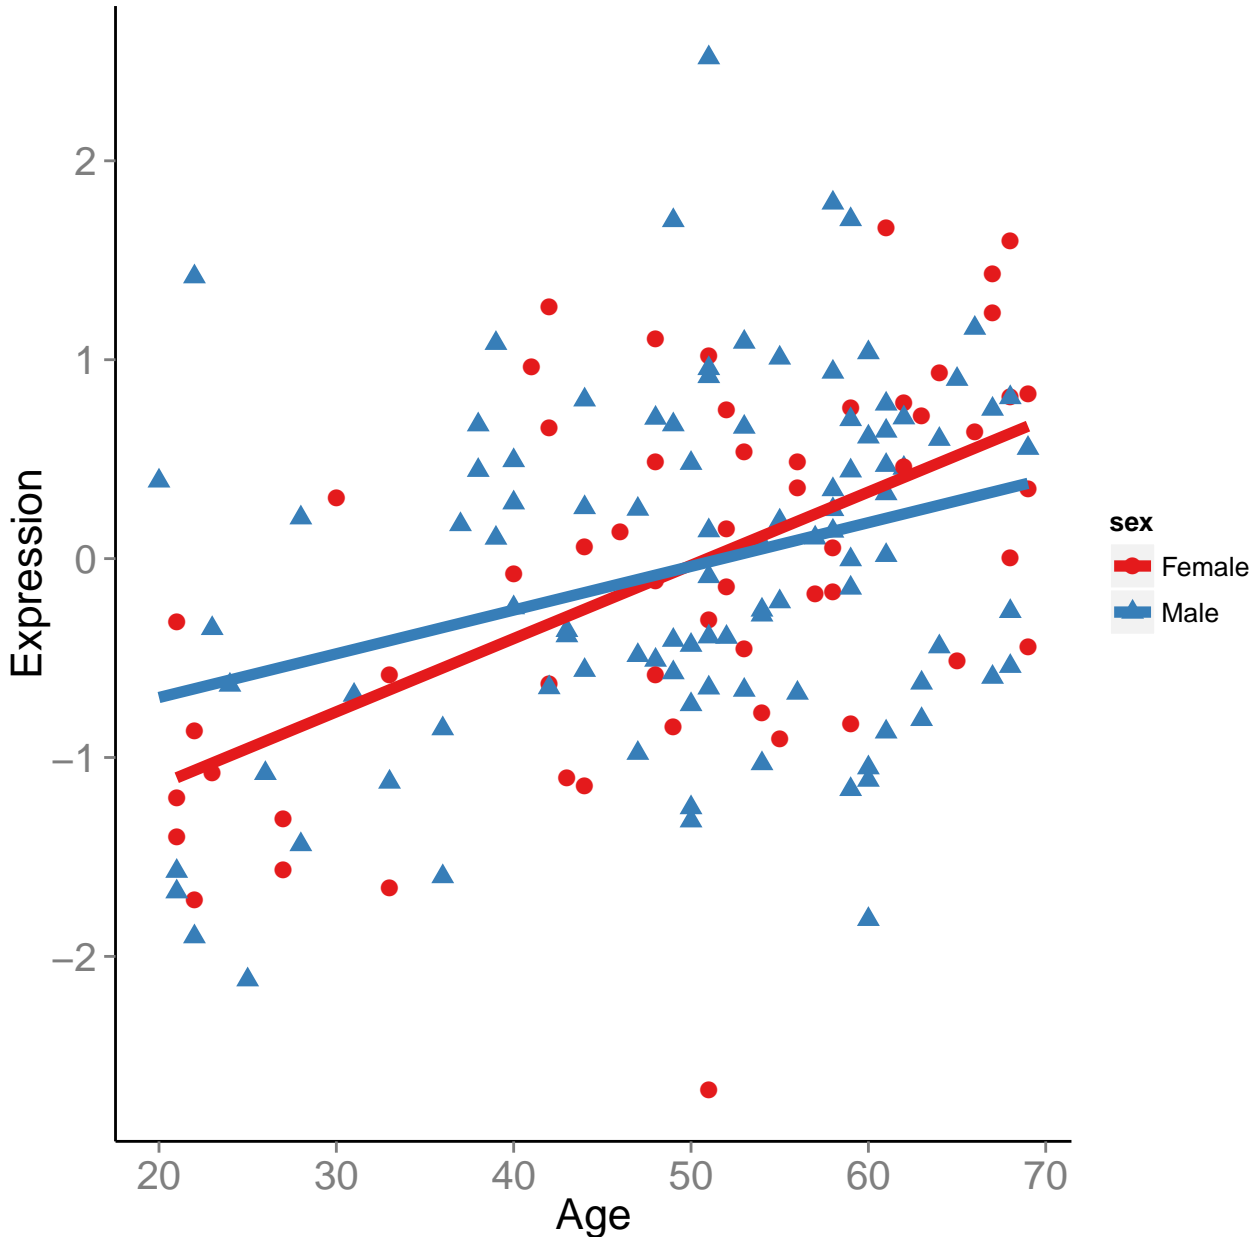

Blood: ARPC3 Pearson-R=-0.42 Pval=6.62E-08

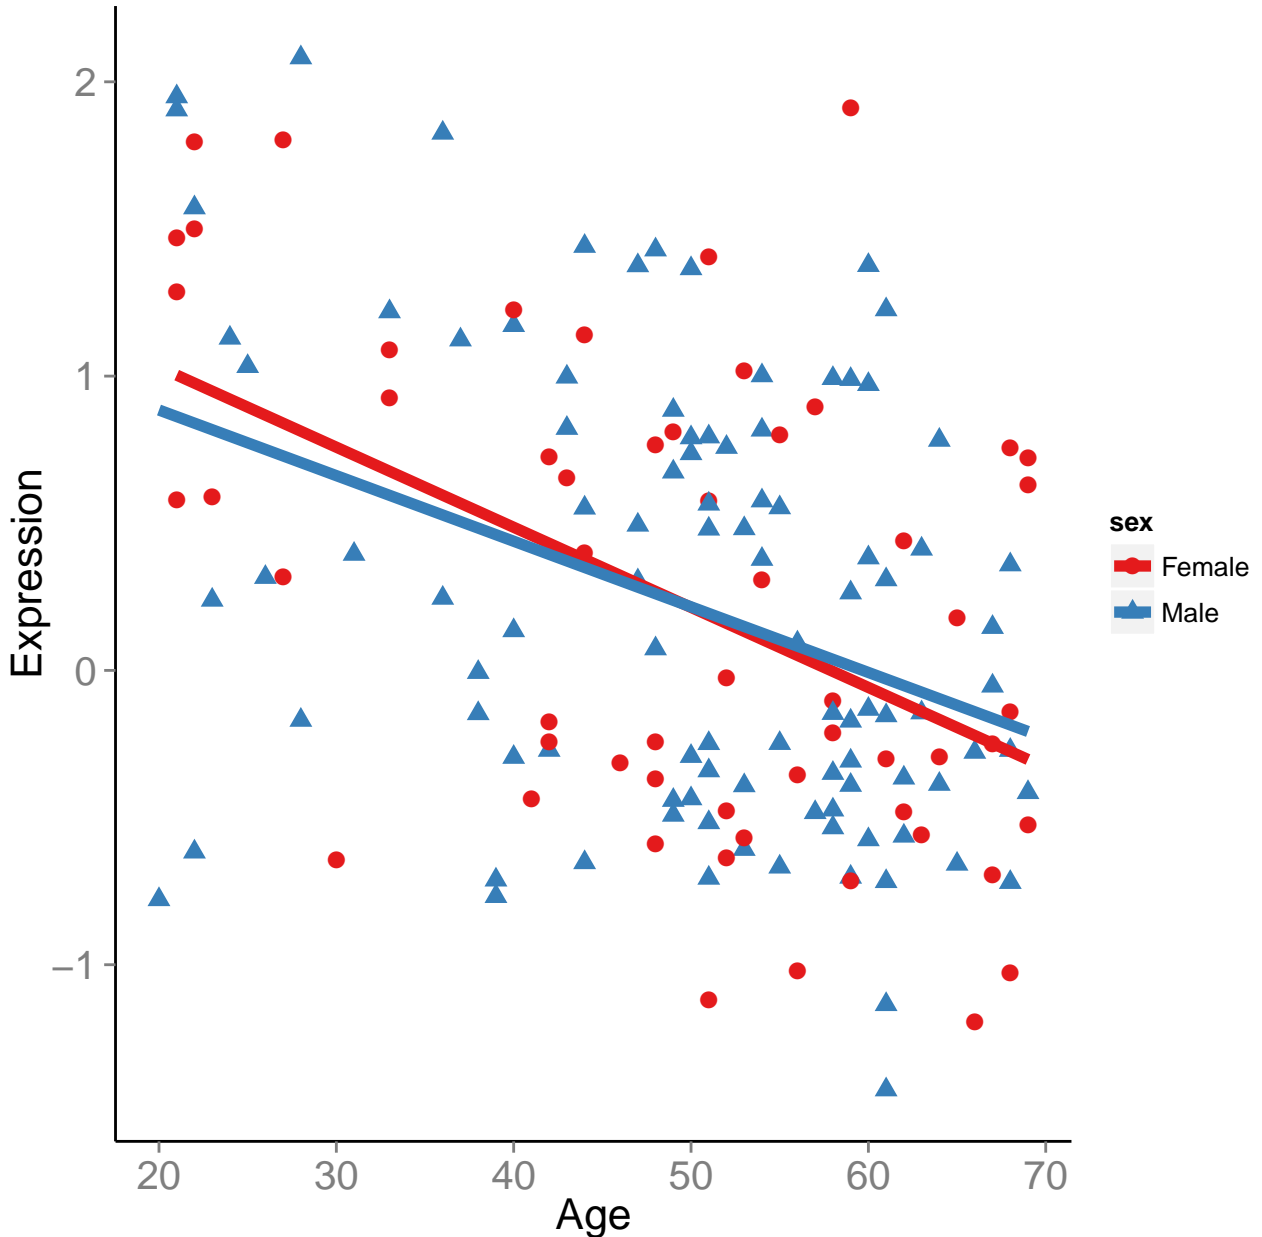



Blood: MFF Pearson-R=-0.42 Pval=6.55E-08

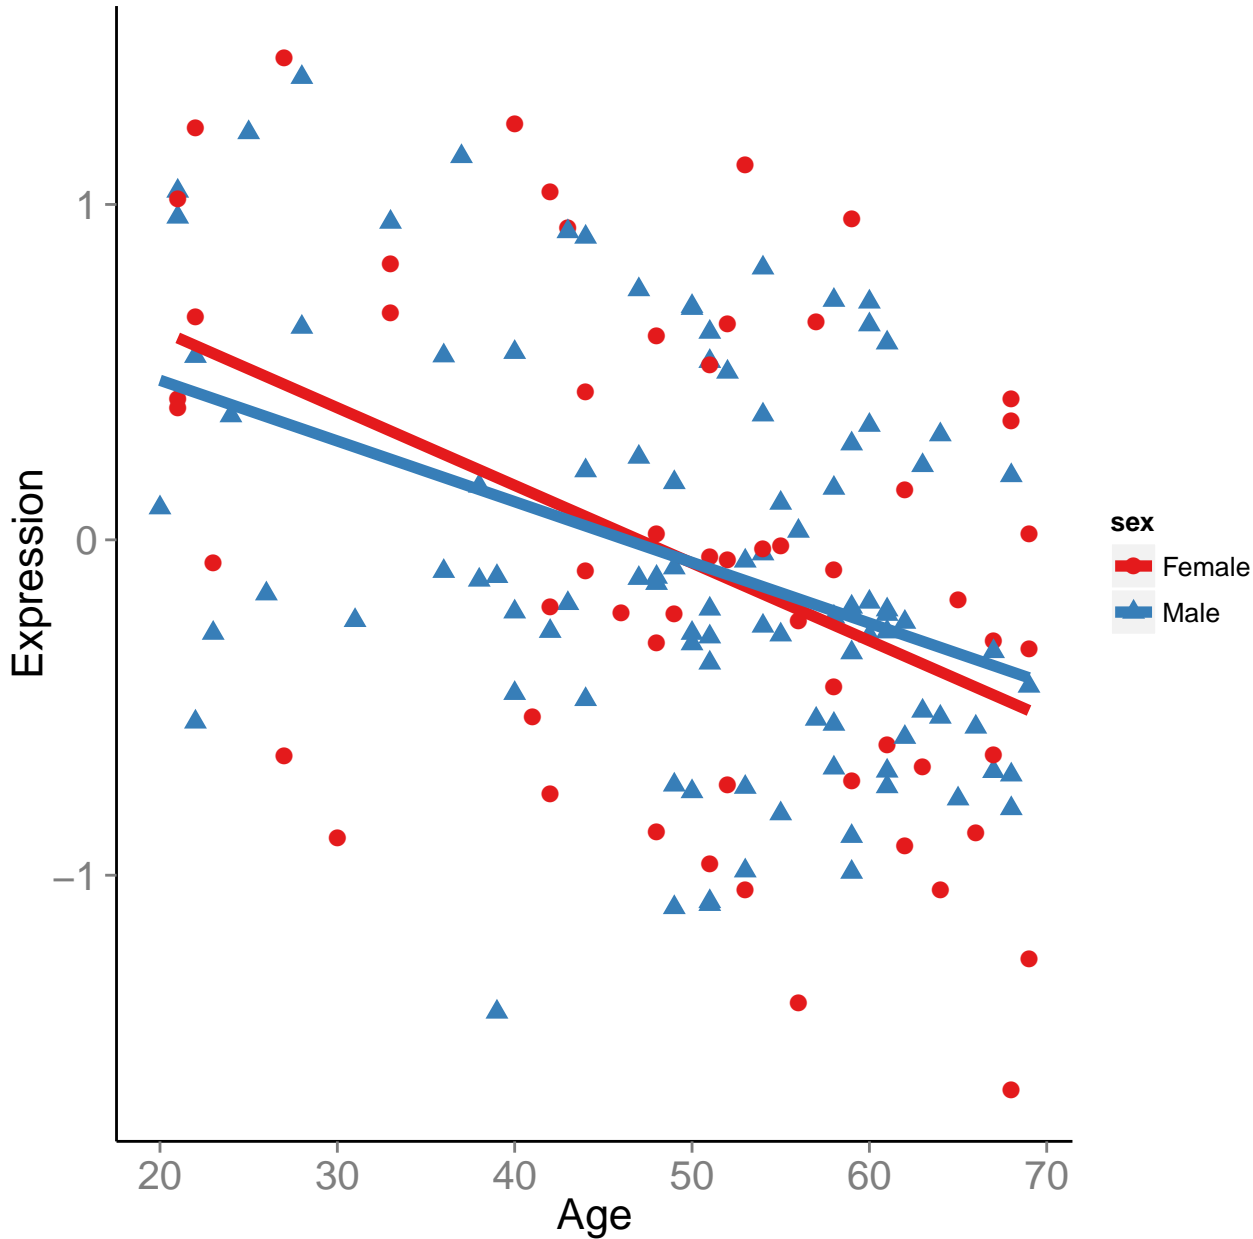

Blood: OSBPL5 Pearson-R=0.41 Pval=8.03E-08

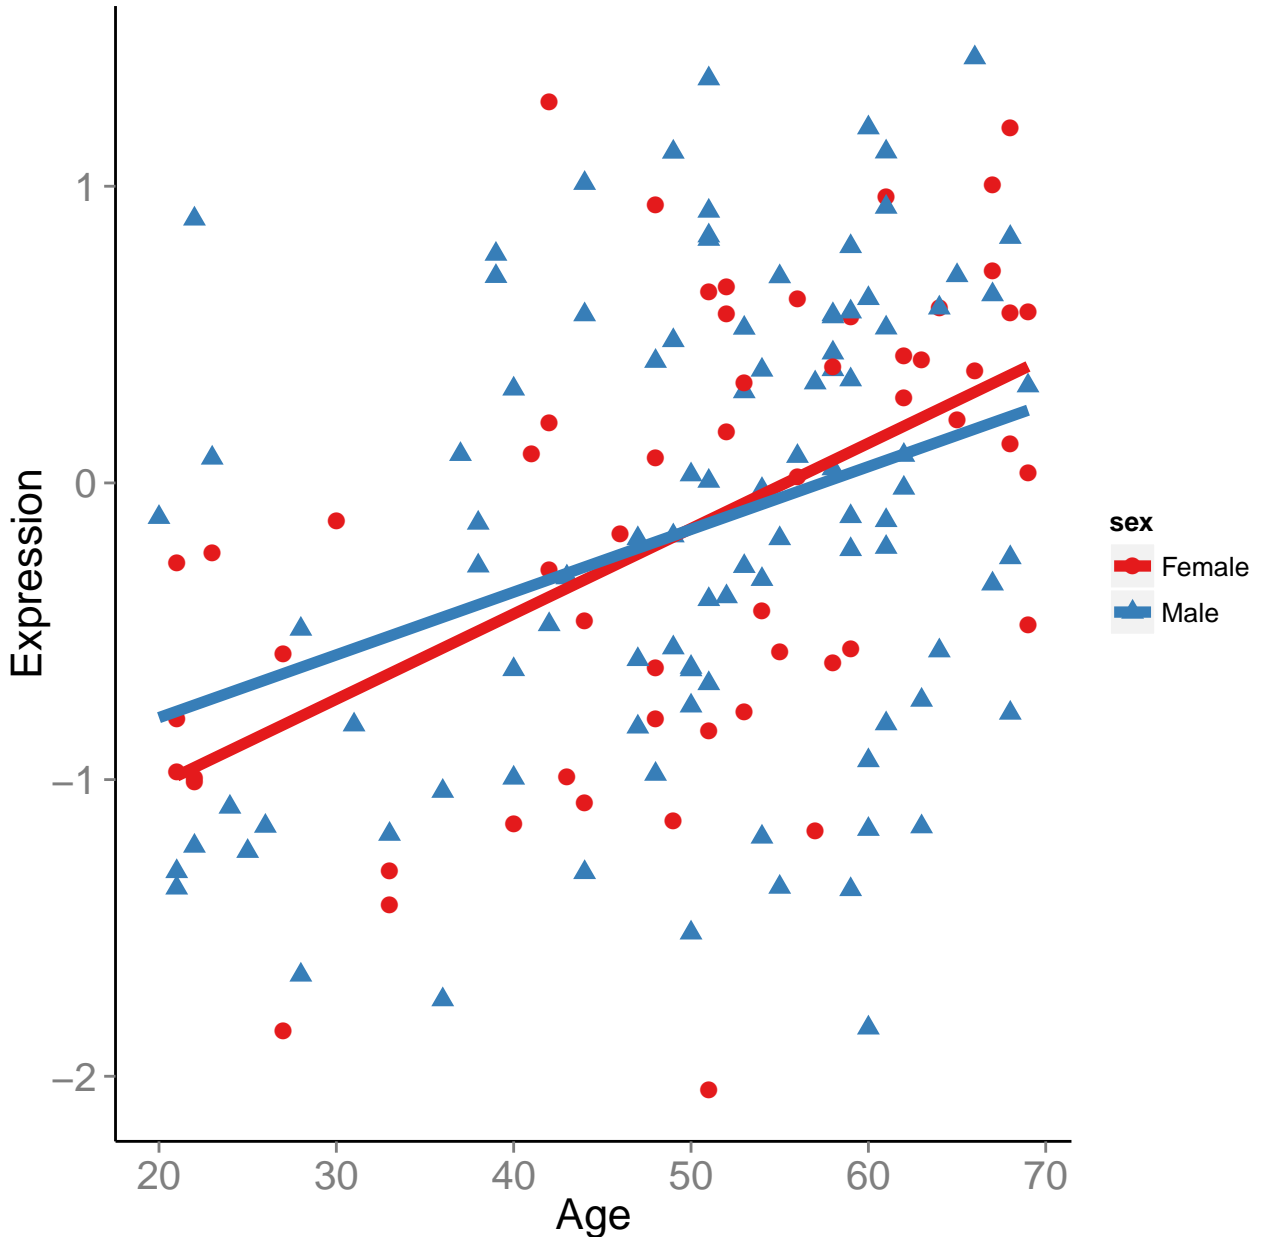

Blood: DUSP10 Pearson-R=0.41 Pval=7.58E-08

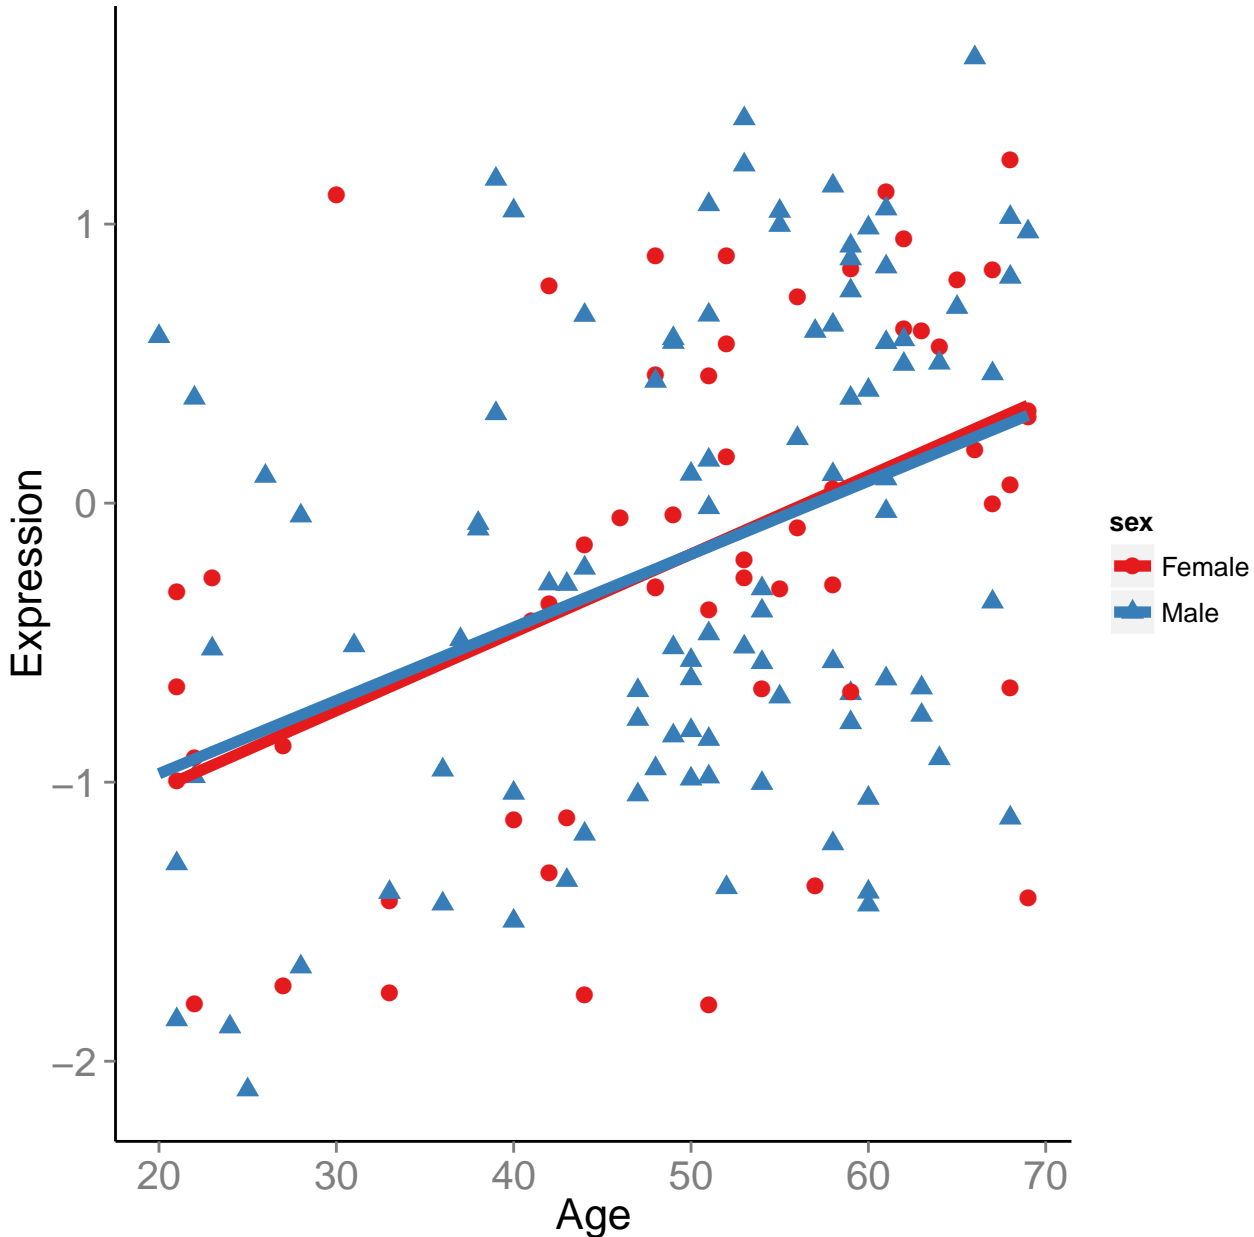

Blood: TMCO4 Pearson-R=0.41 Pval=7.89E-08

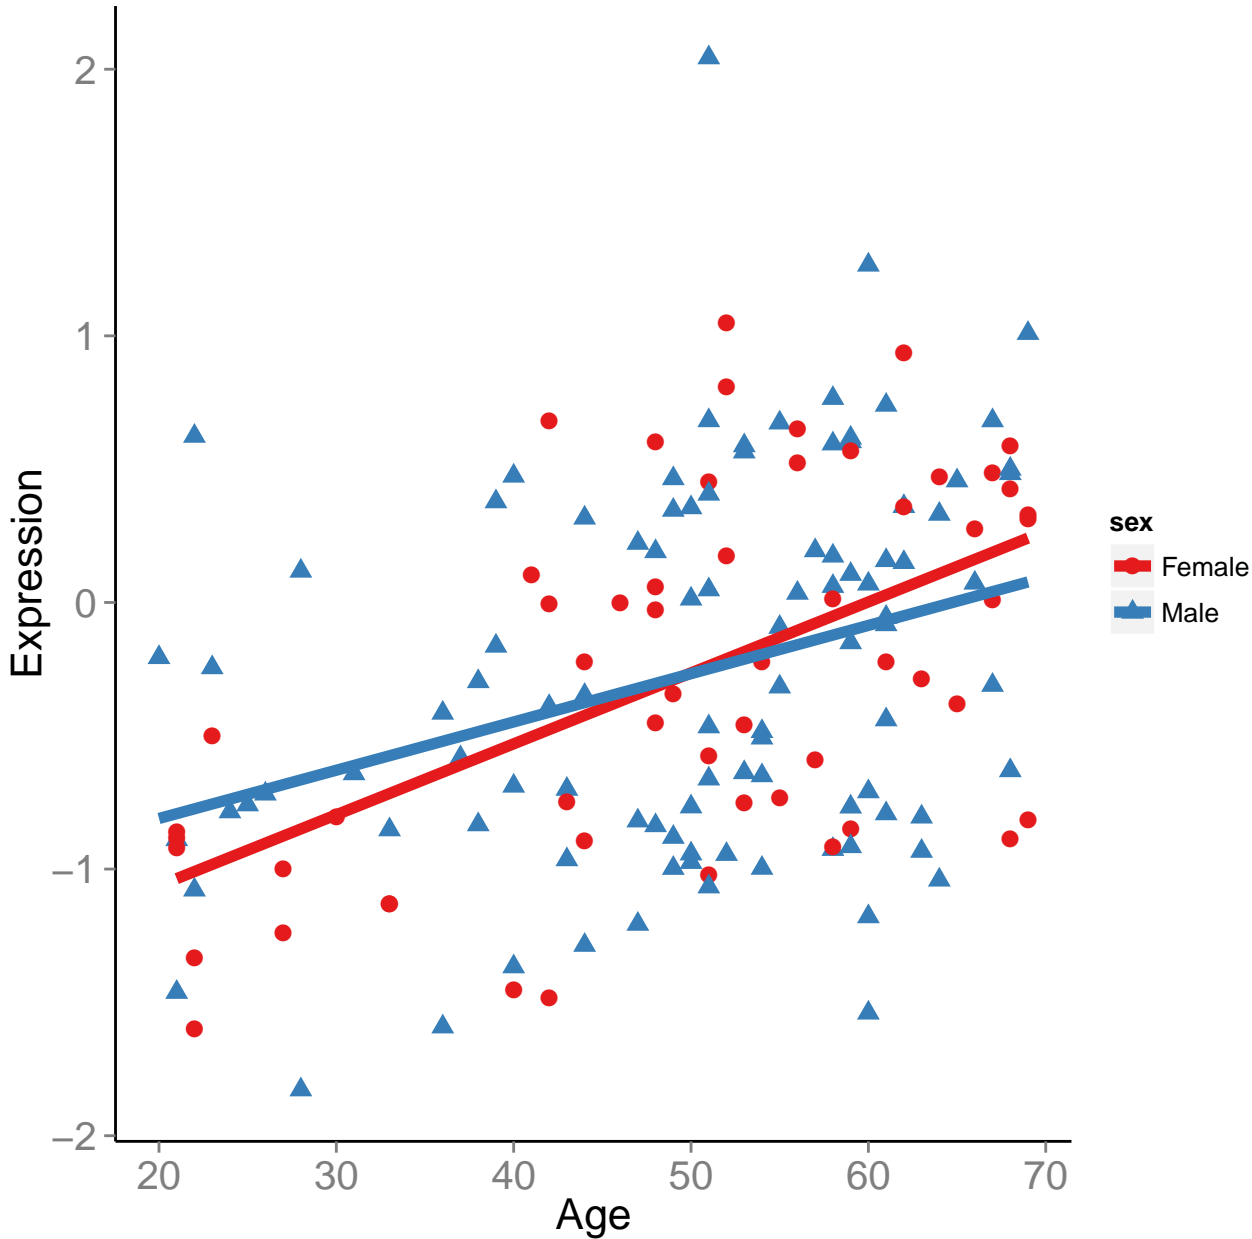

Blood: TUBA1A Pearson-R=-0.41 Pval=7.82E-08

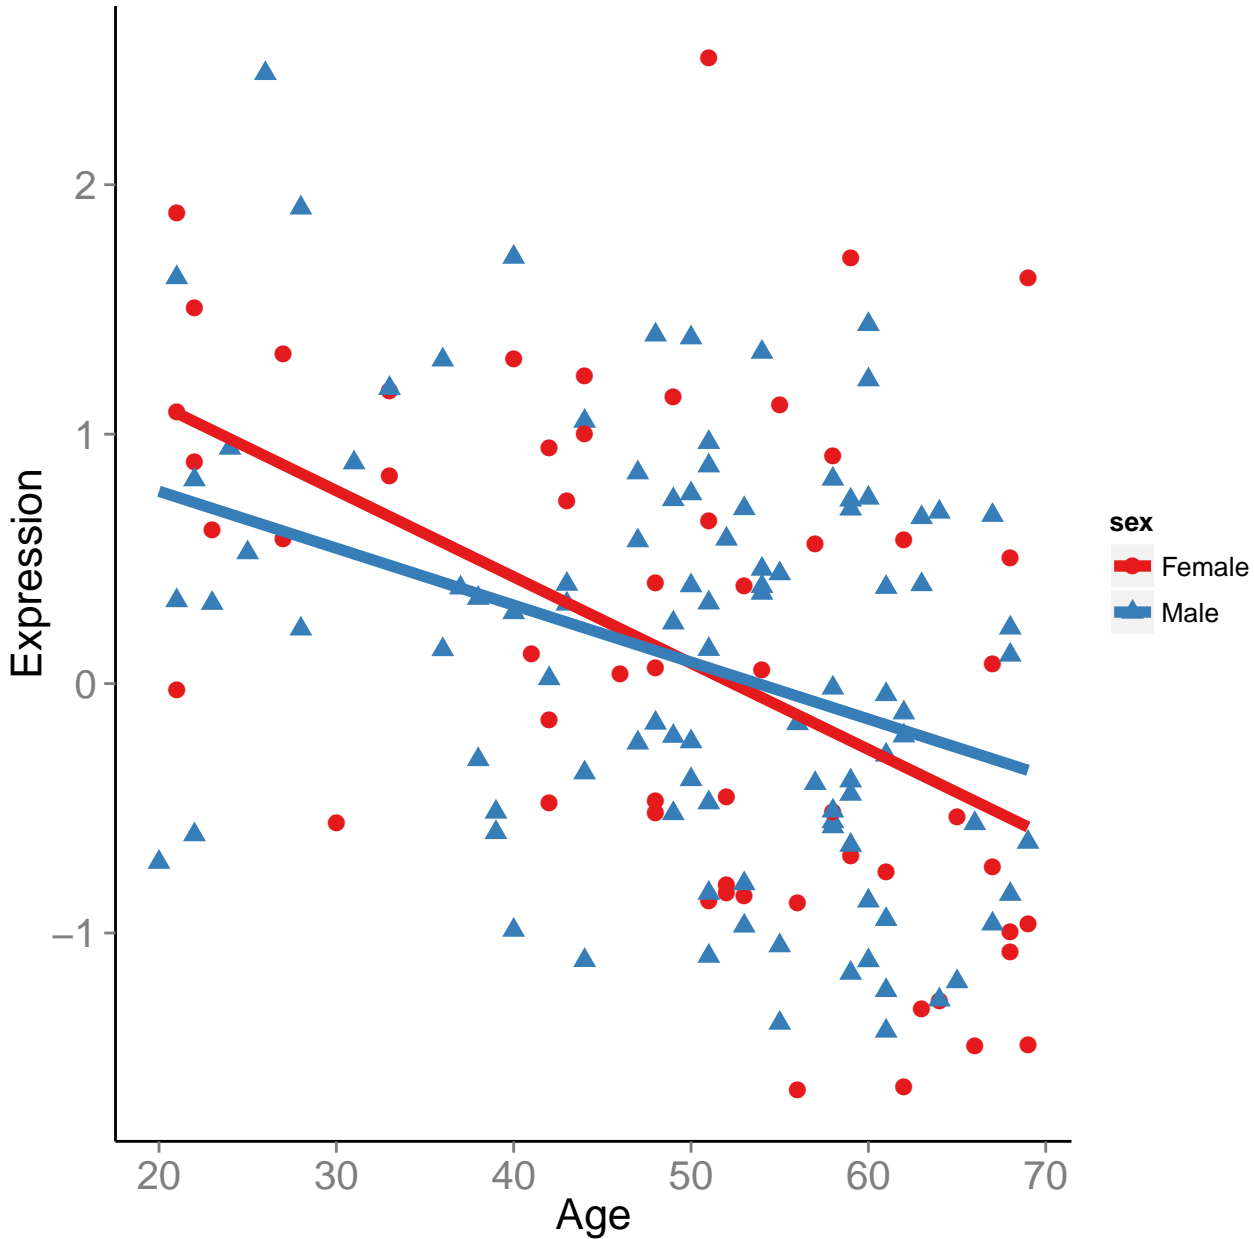

Blood: AKTIP Pearson-R=-0.41 Pval=8.27E-08

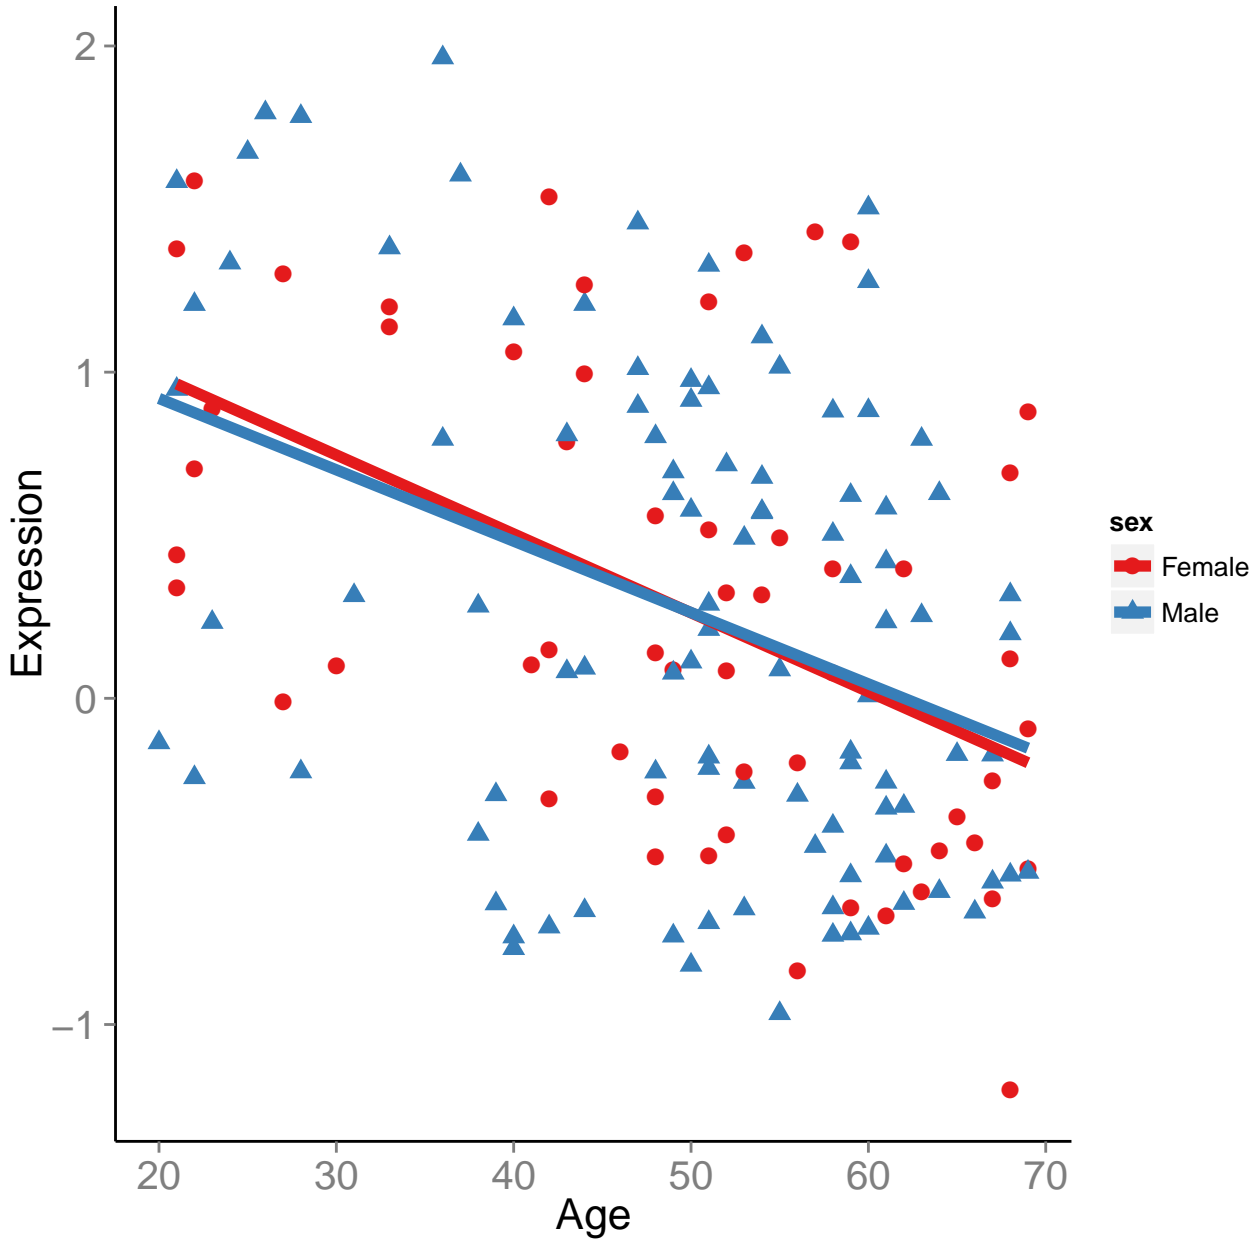

Blood: LYPLAL1 Pearson-R=-0.41 Pval=1.10E-07

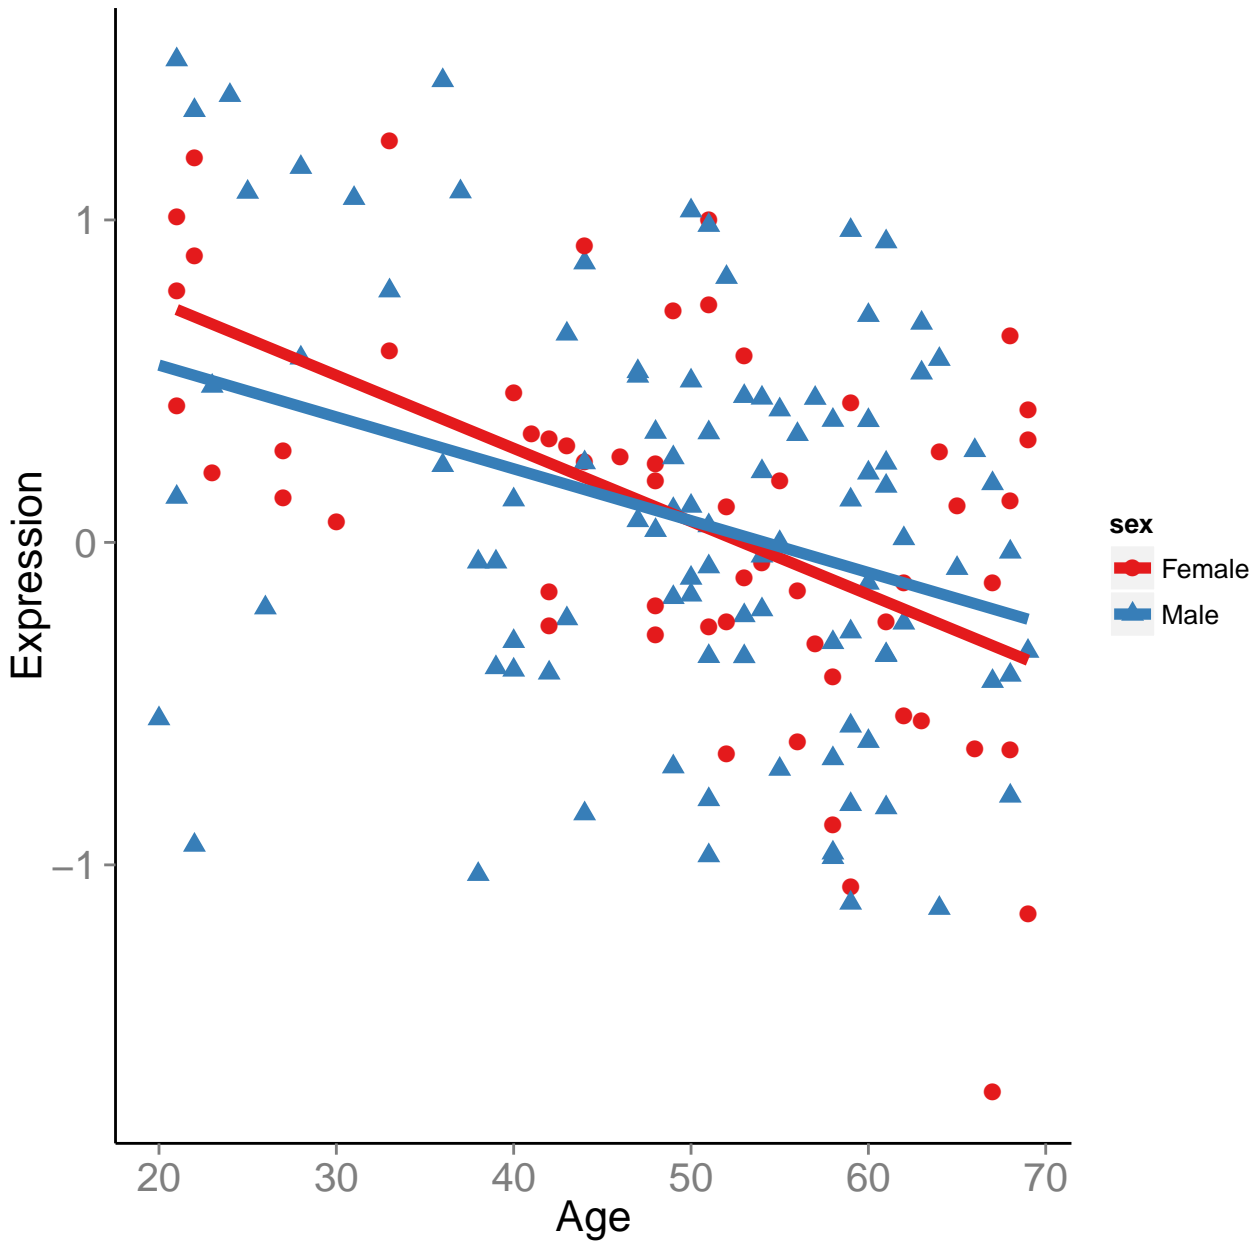

Blood: AC034102.1 Pearson-R=-0.41 Pval=1.00E-07

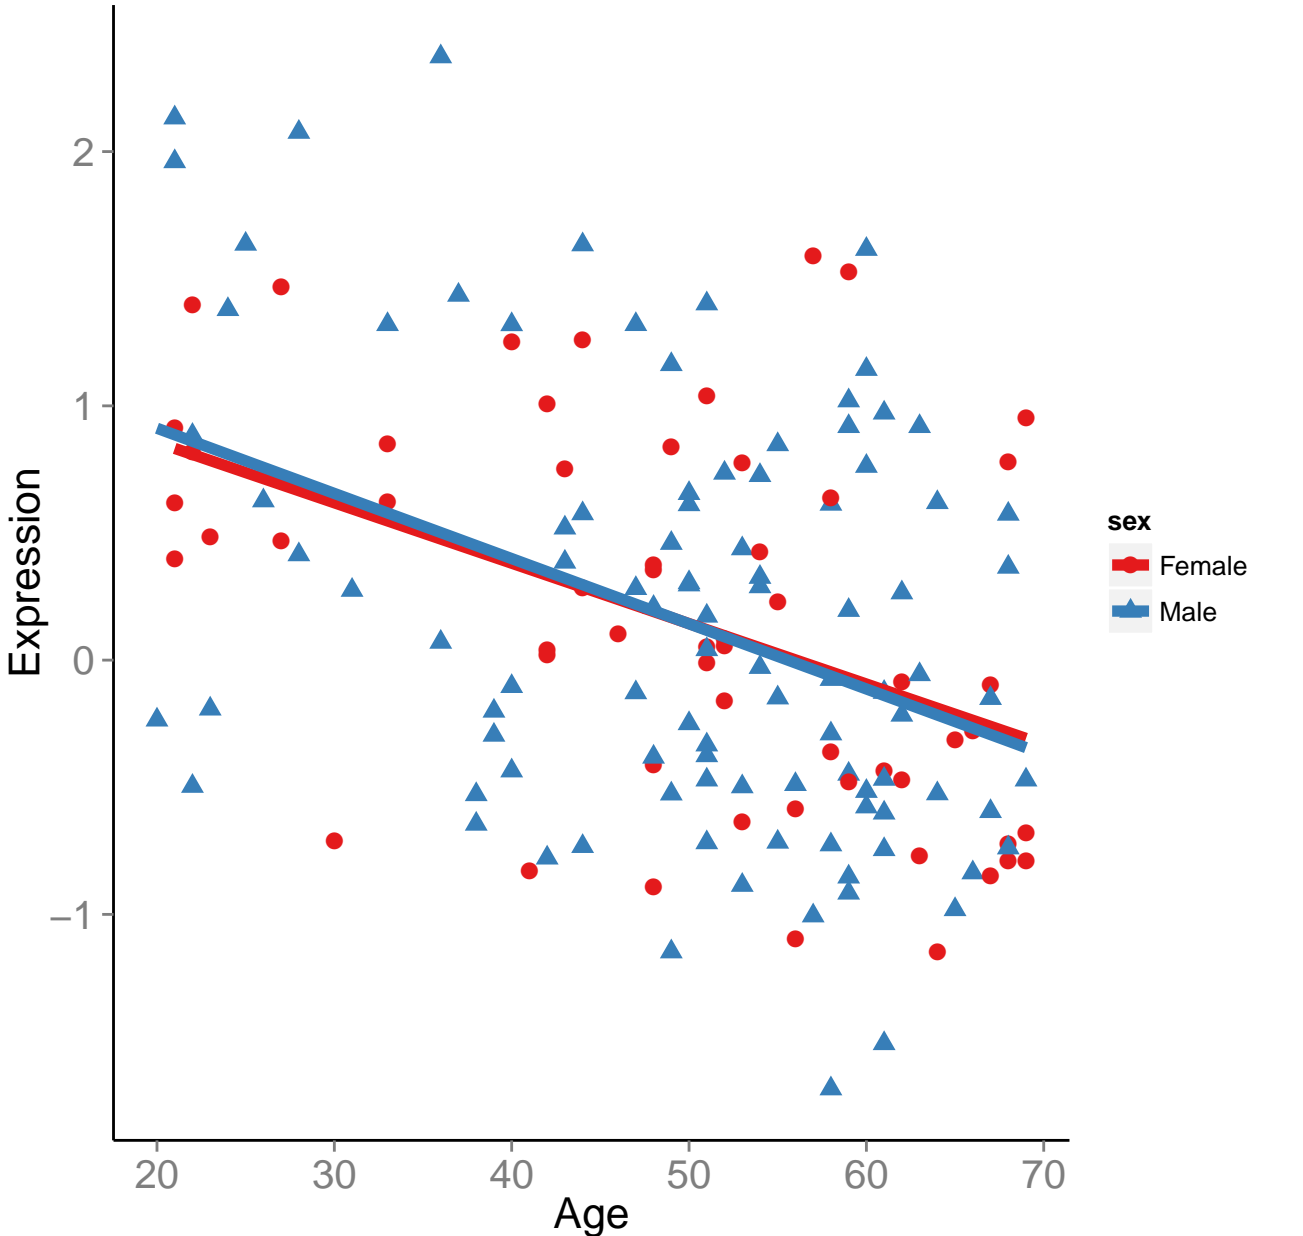



Blood: AGAP6 Pearson-R=0.41 Pval=1.06E-07

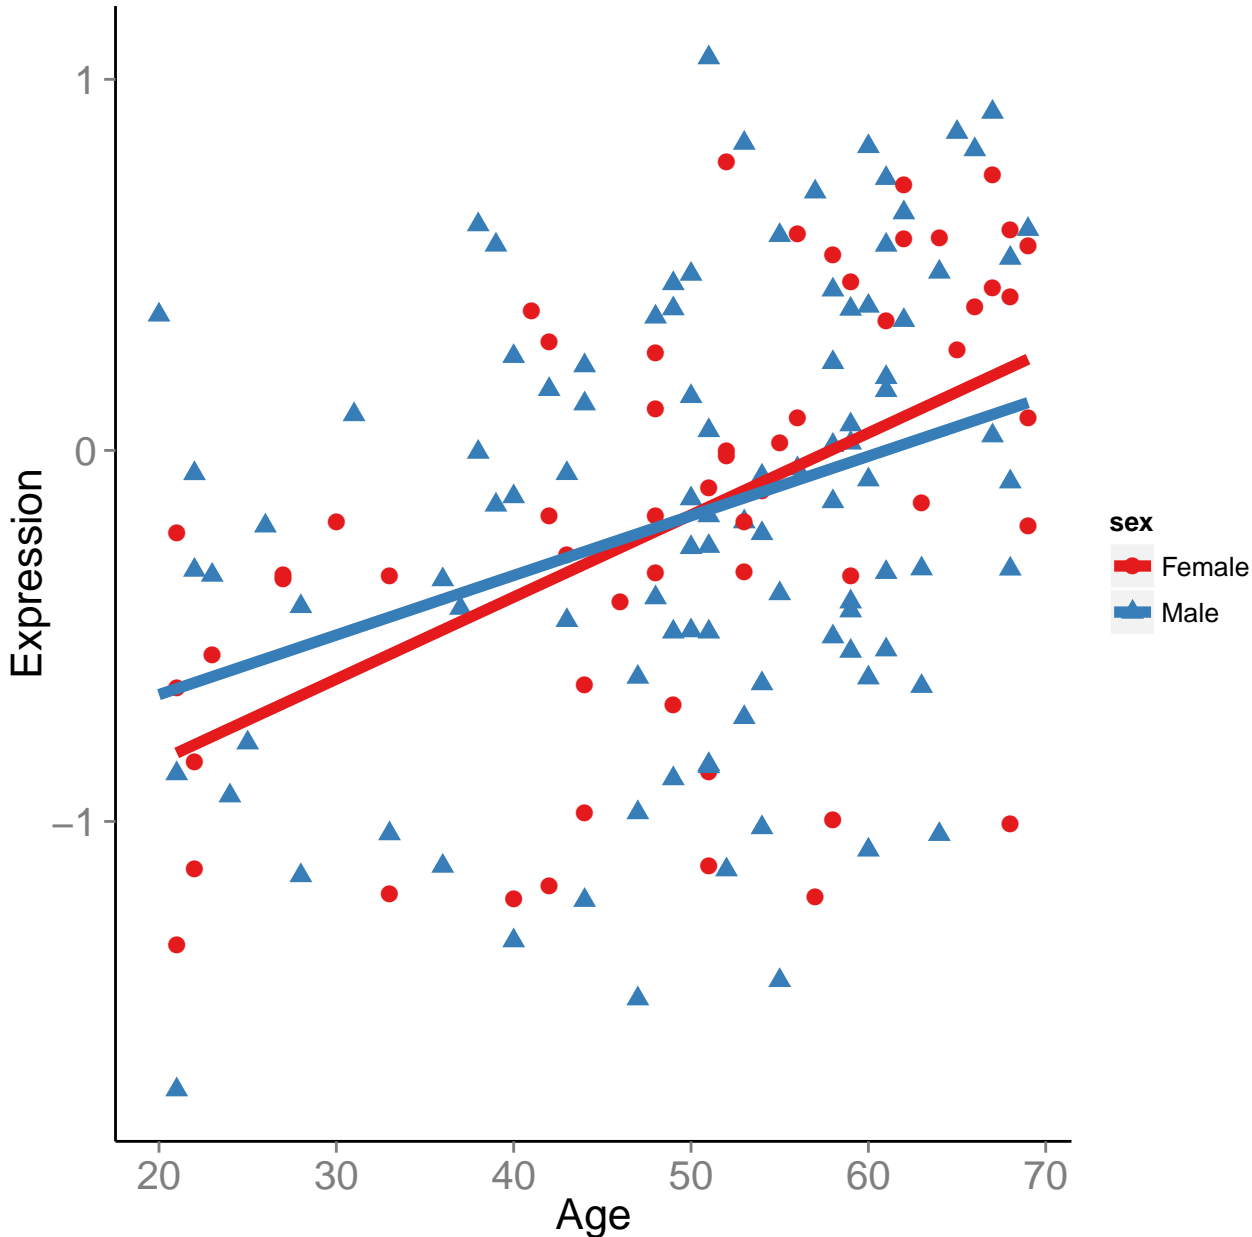

Blood: KIAA1143 Pearson-R=-0.41 Pval=1.08E-07

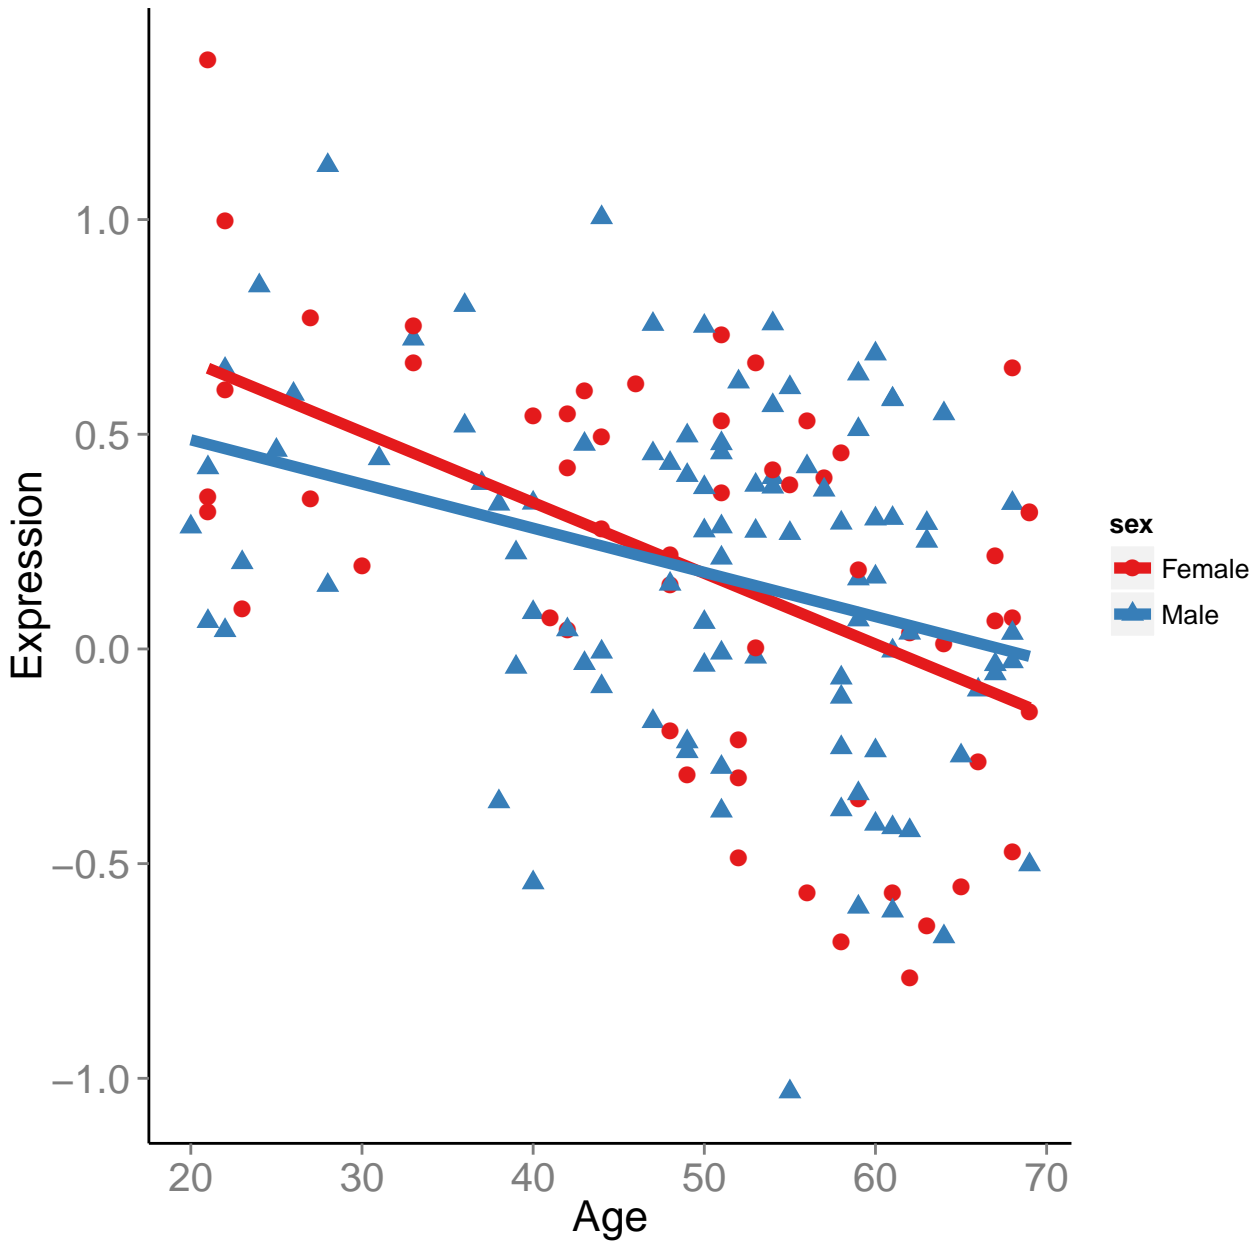

Blood: KLRF1 Pearson-R=0.41 Pval=1.05E-07

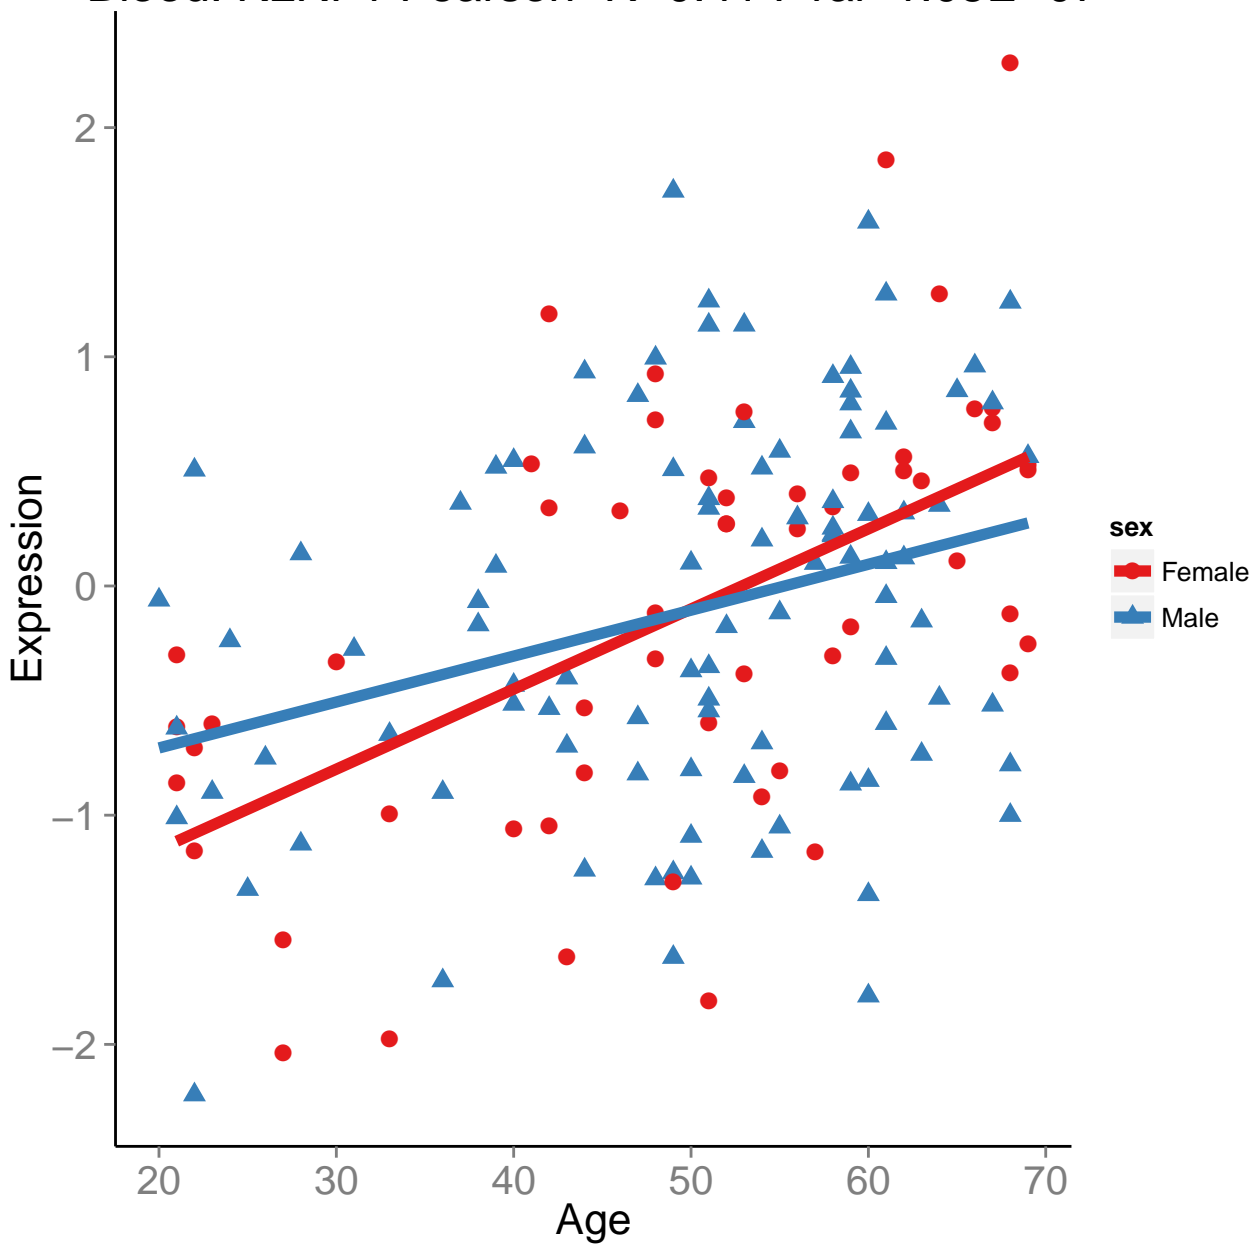

Blood: RP11-513I15.6 Pearson-R=-0.41 Pval=1.05E-07

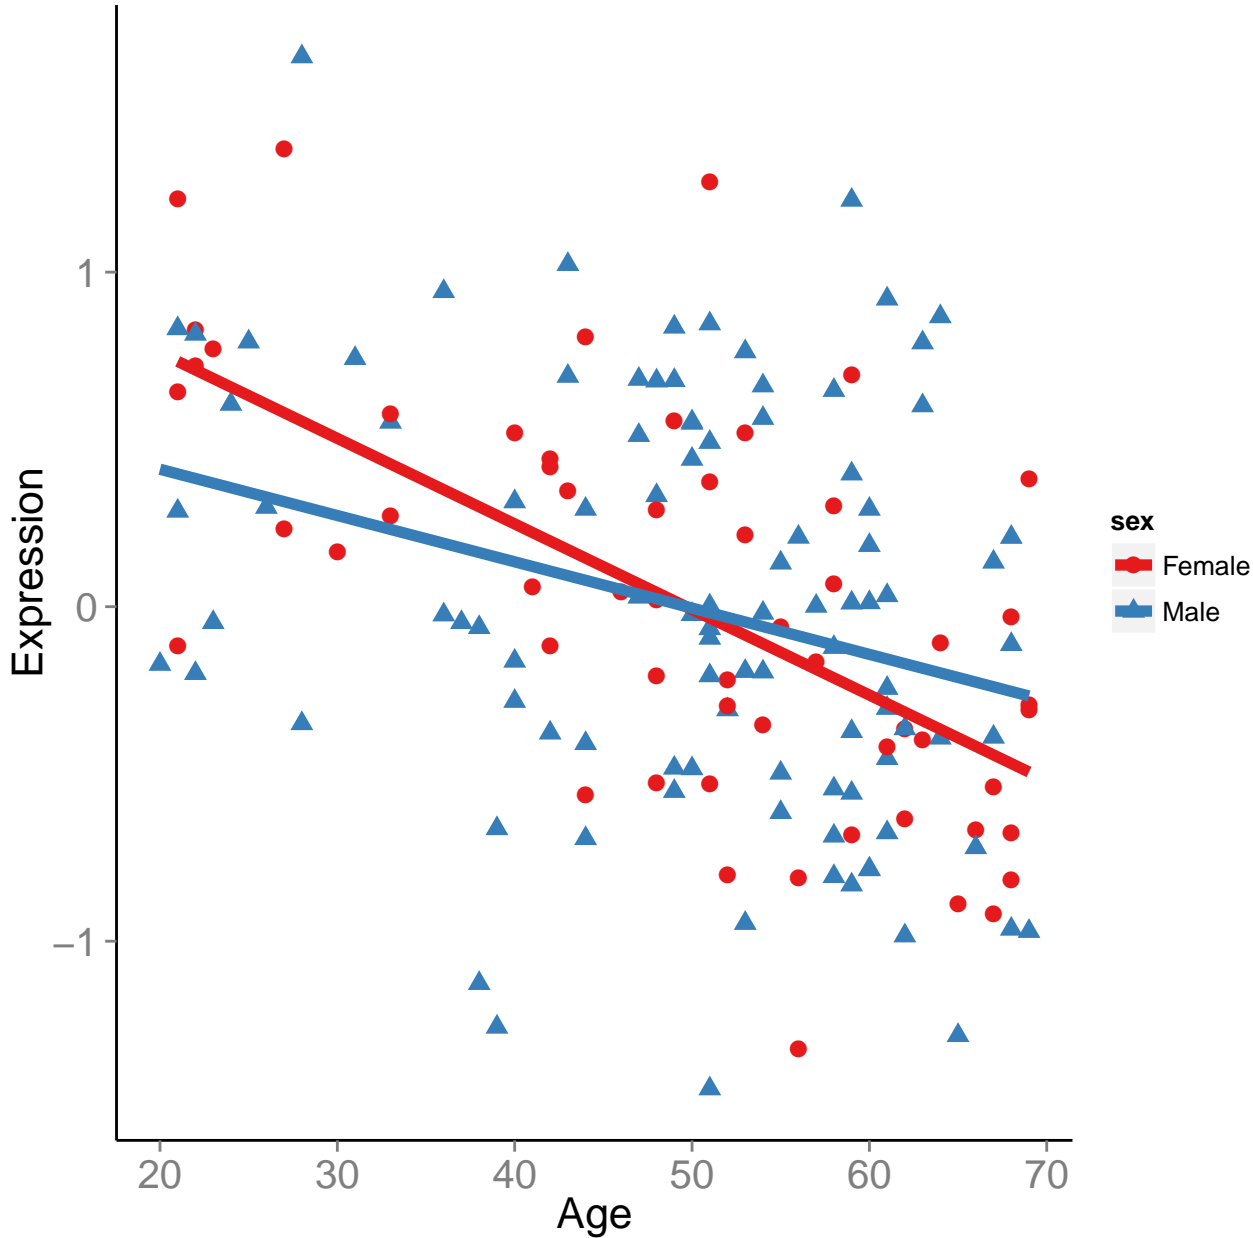

Blood: DTHD1 Pearson-R=0.41 Pval=1.13E-07

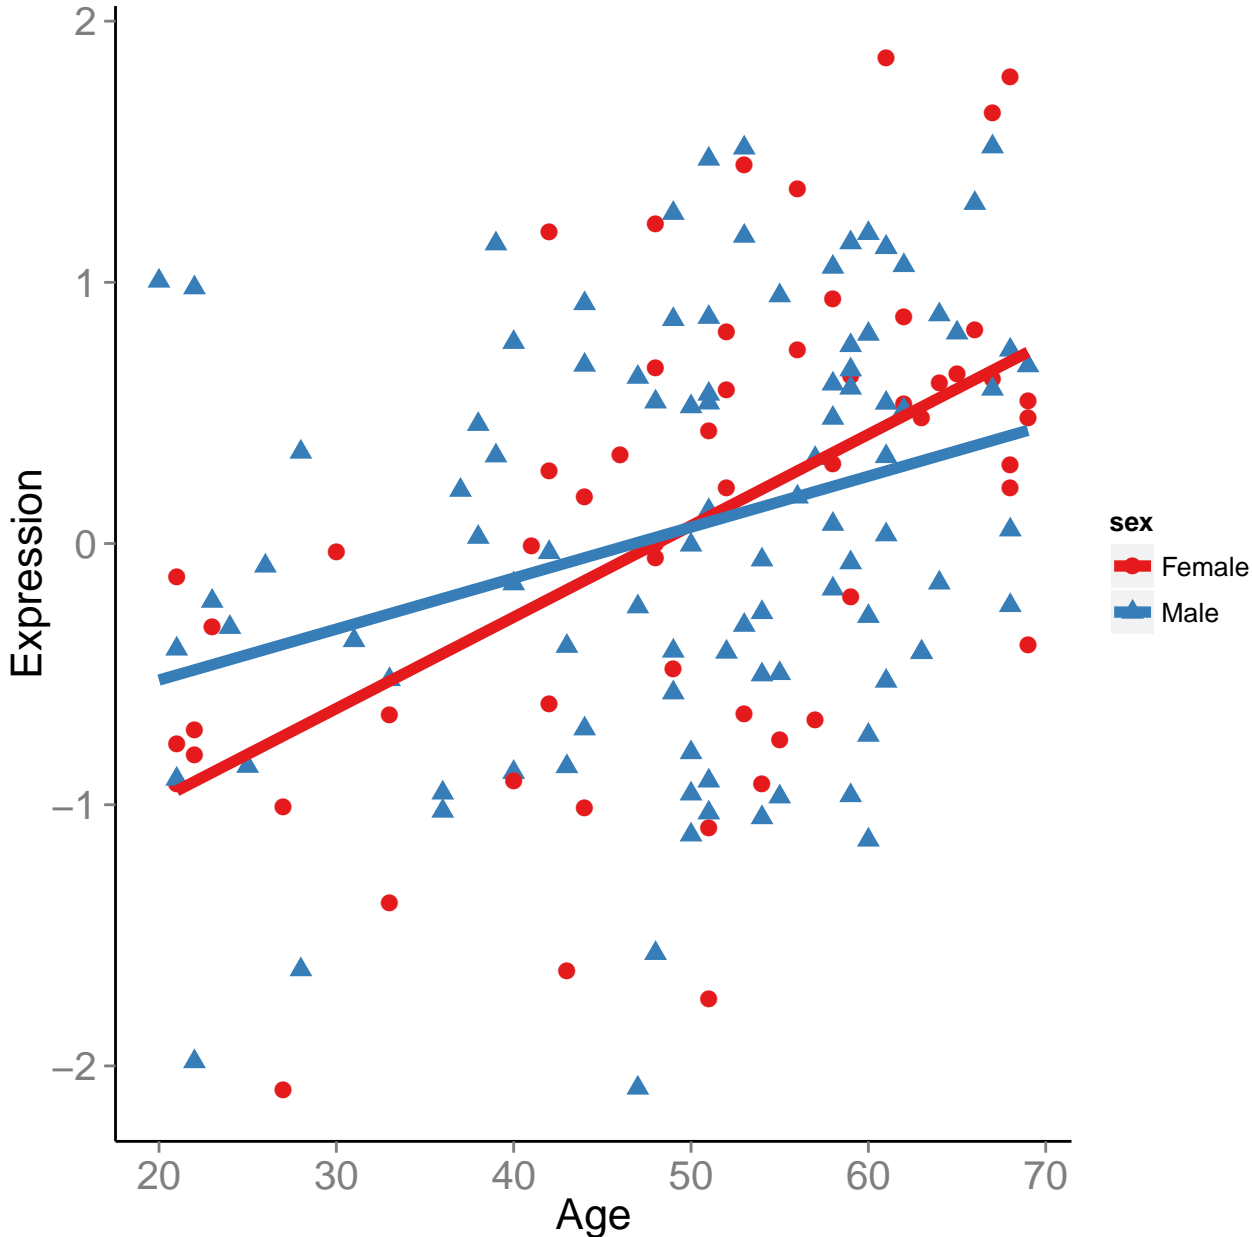

Blood: RP11-890B15.3 Pearson-R=-0.41 Pval=1.17E-07

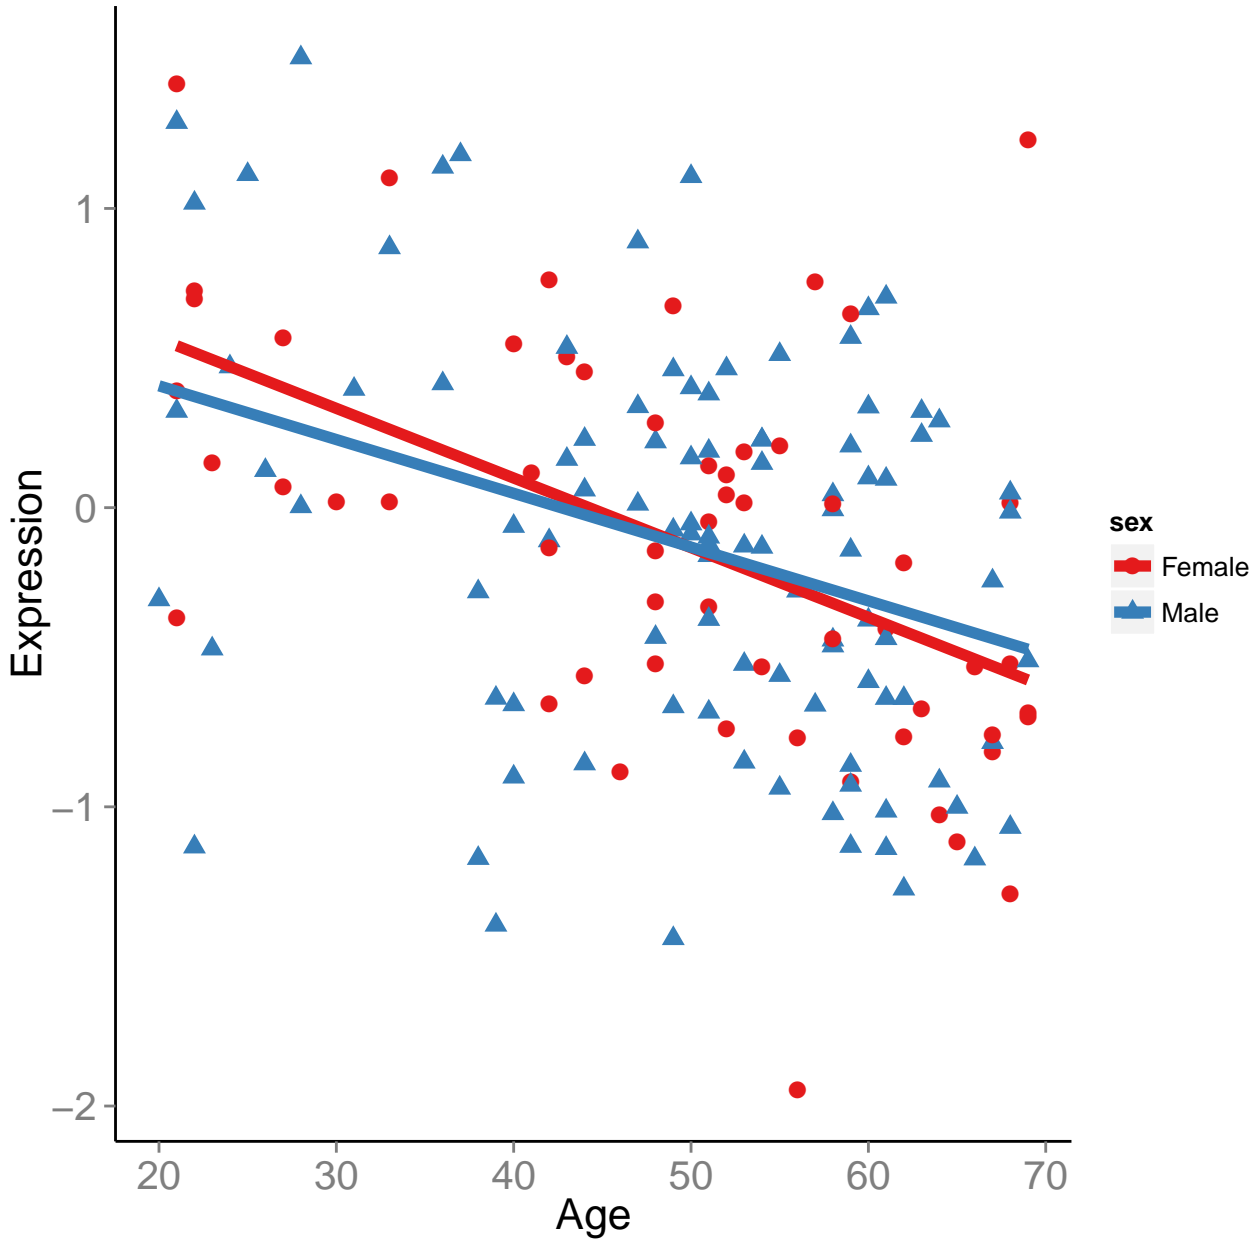

Blood: AC017116.11 Pearson-R=-0.41 Pval=1.17E-07

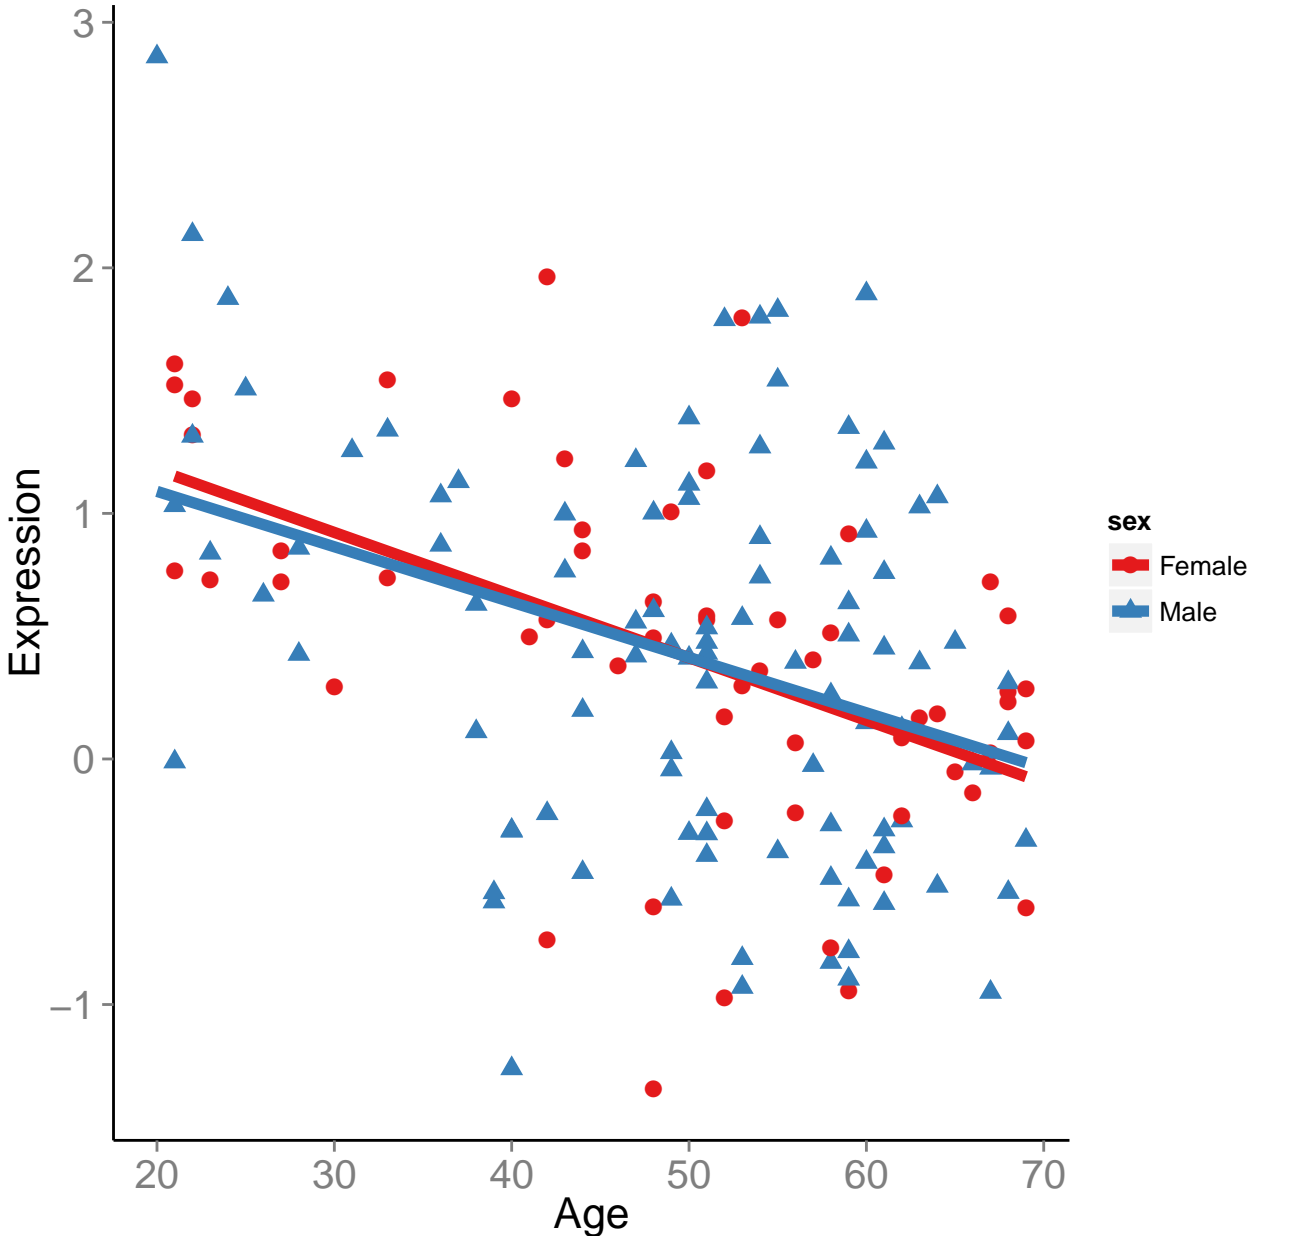

Blood: RP5-1142A6.9 Pearson-R=0.41 Pval=1.27E-07

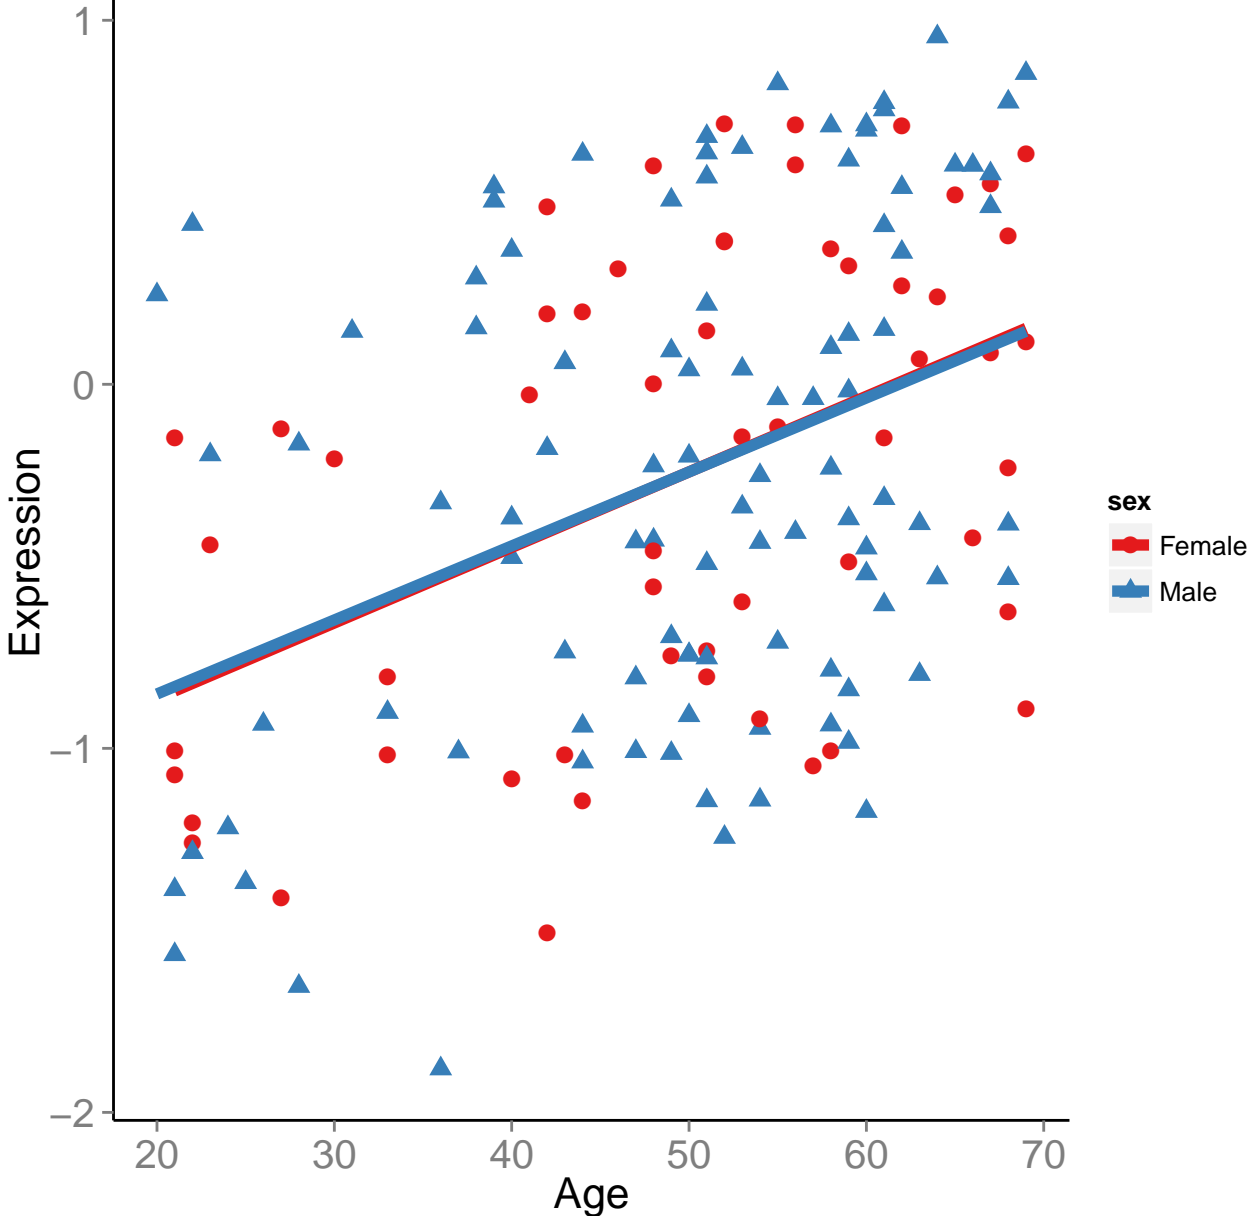



Blood: FCRL6 Pearson-R=0.41 Pval=1.34E-07

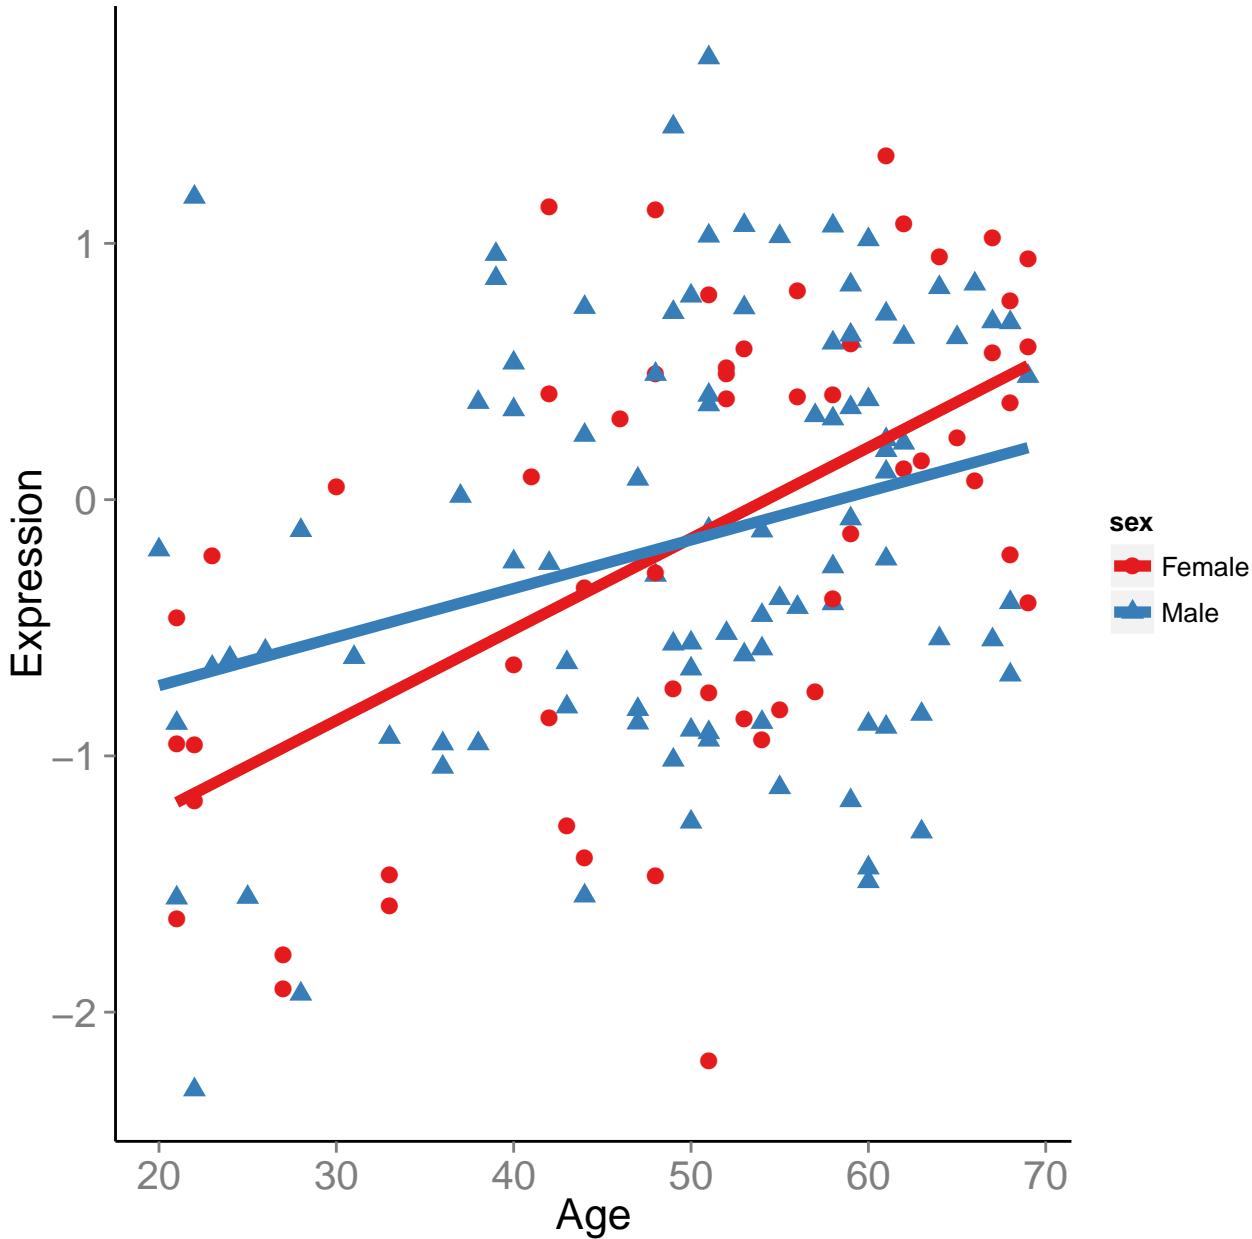

Blood: CCR7 Pearson-R=-0.40 Pval=1.64E-07

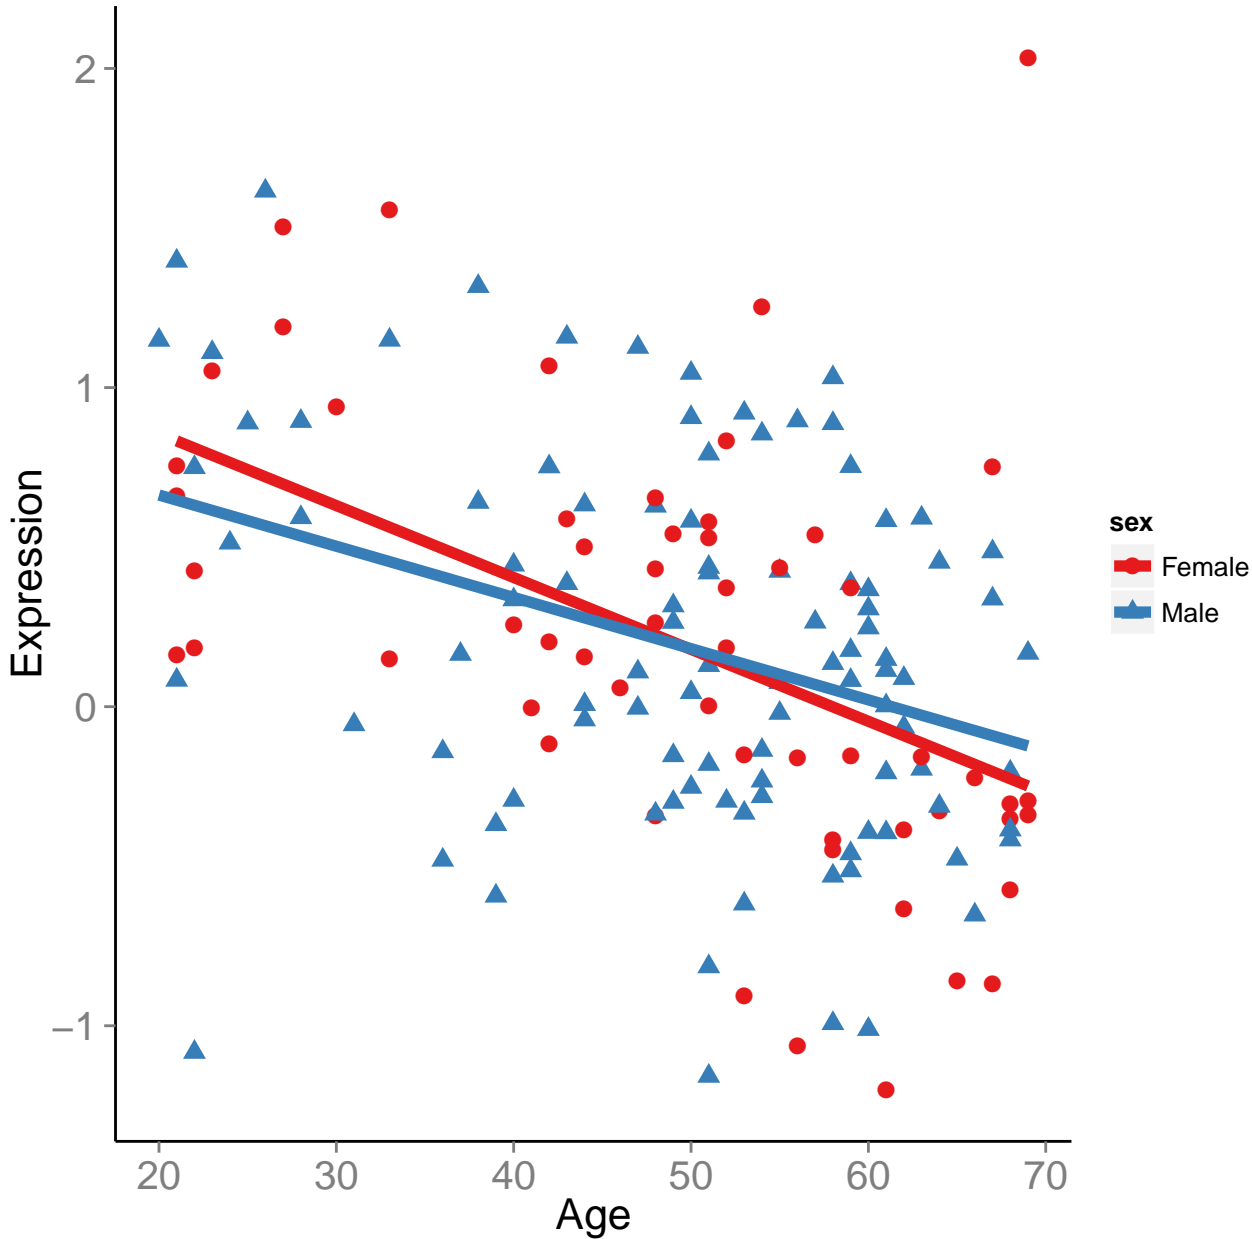

Blood: H3F3AP4 Pearson-R=-0.40 Pval=1.62E-07

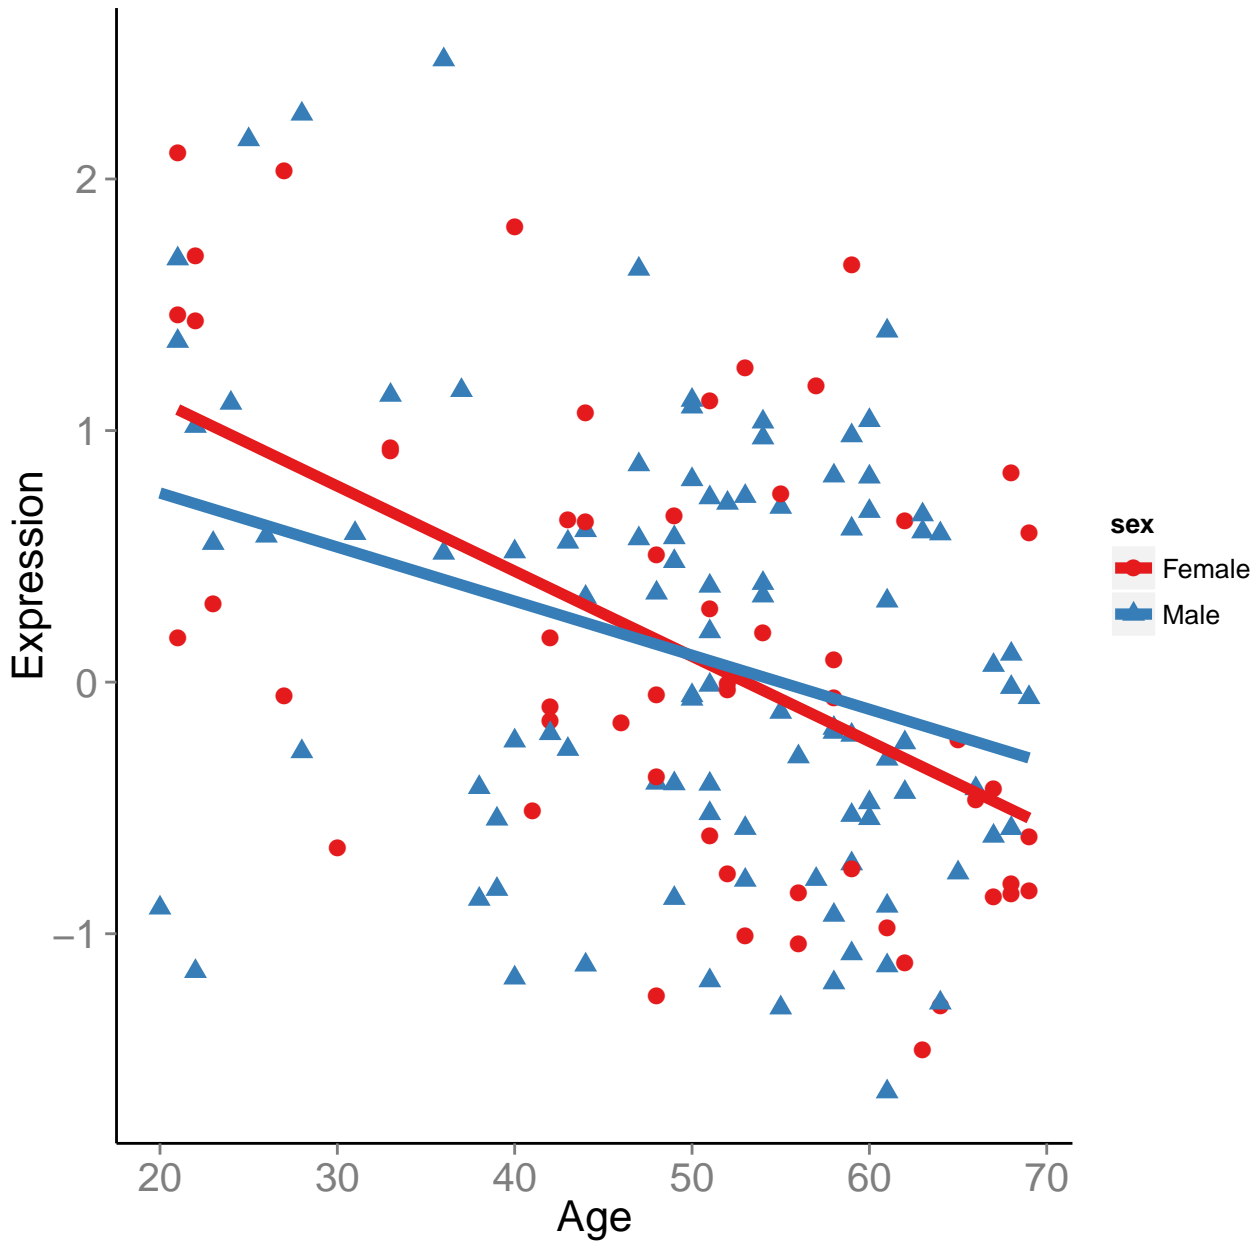

Blood: RAB11A Pearson-R=-0.40 Pval=1.67E-07

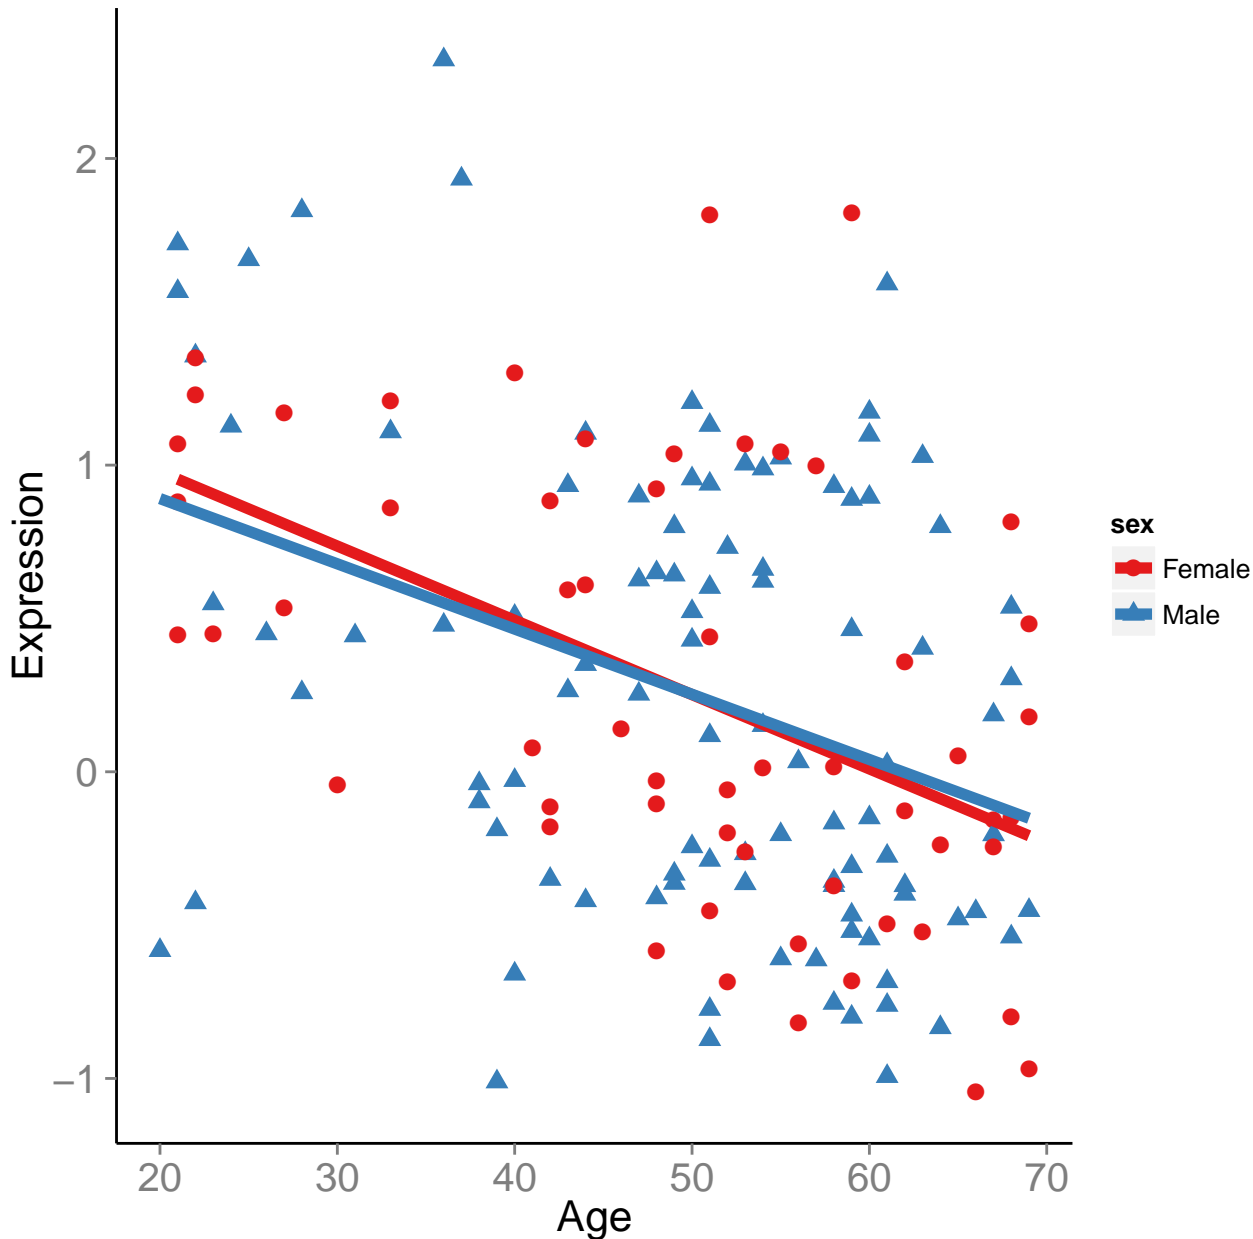

Blood: MZT1 Pearson-R=0.40 Pval=1.64E-07

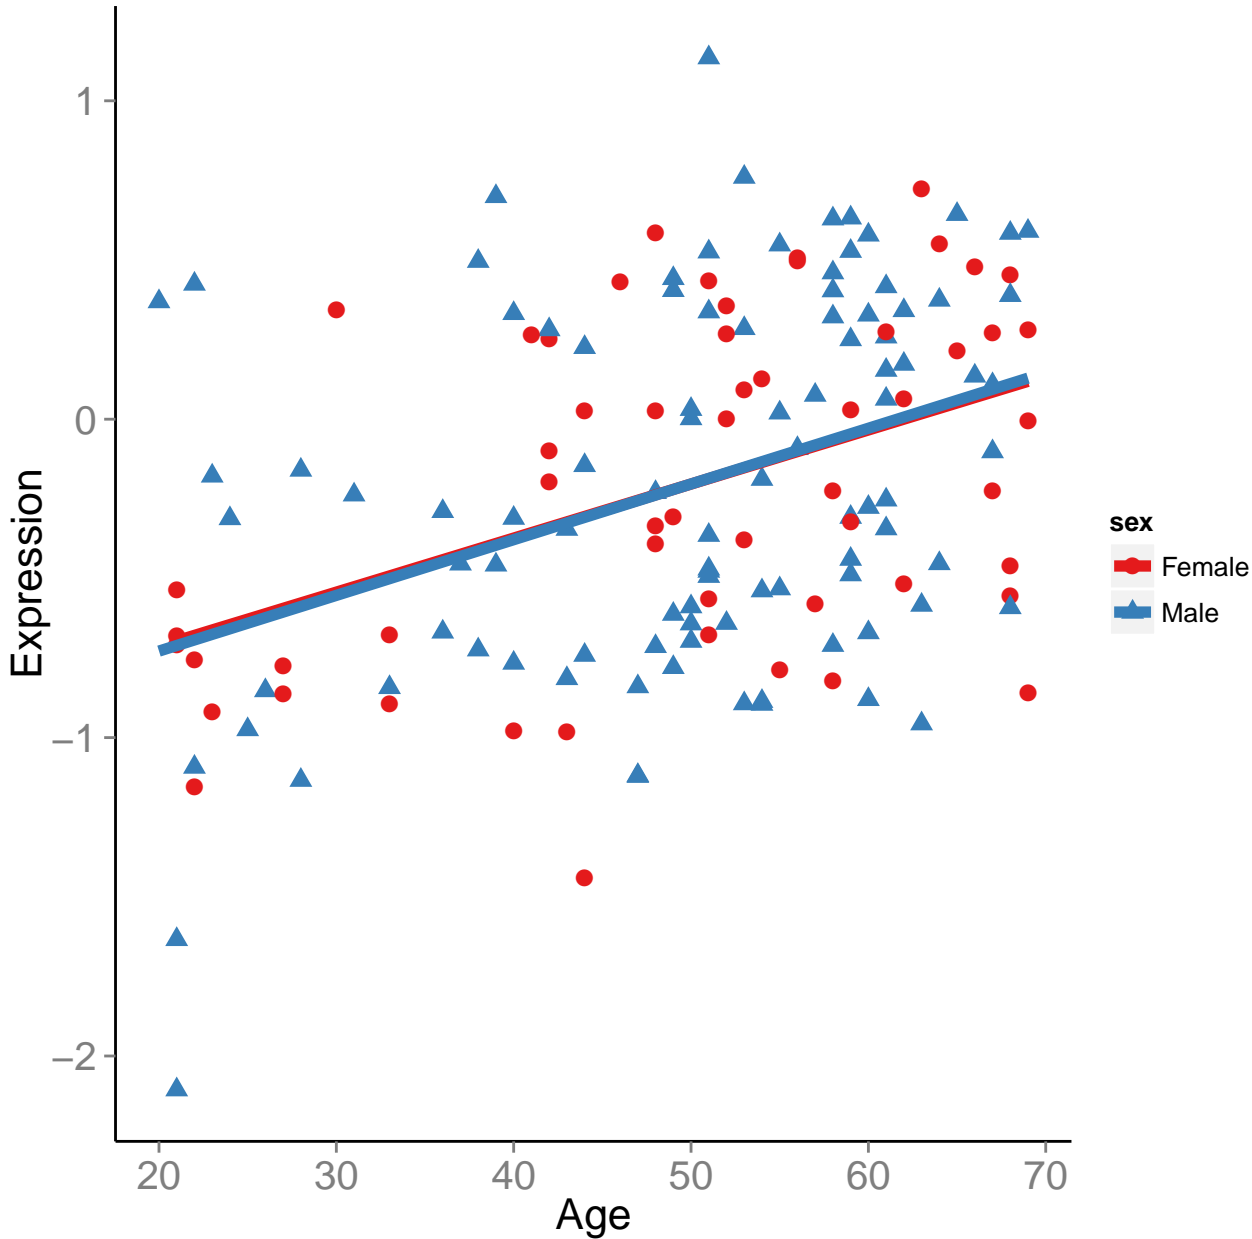

Blood: VTA1 Pearson-R=-0.40 Pval=1.78E-07

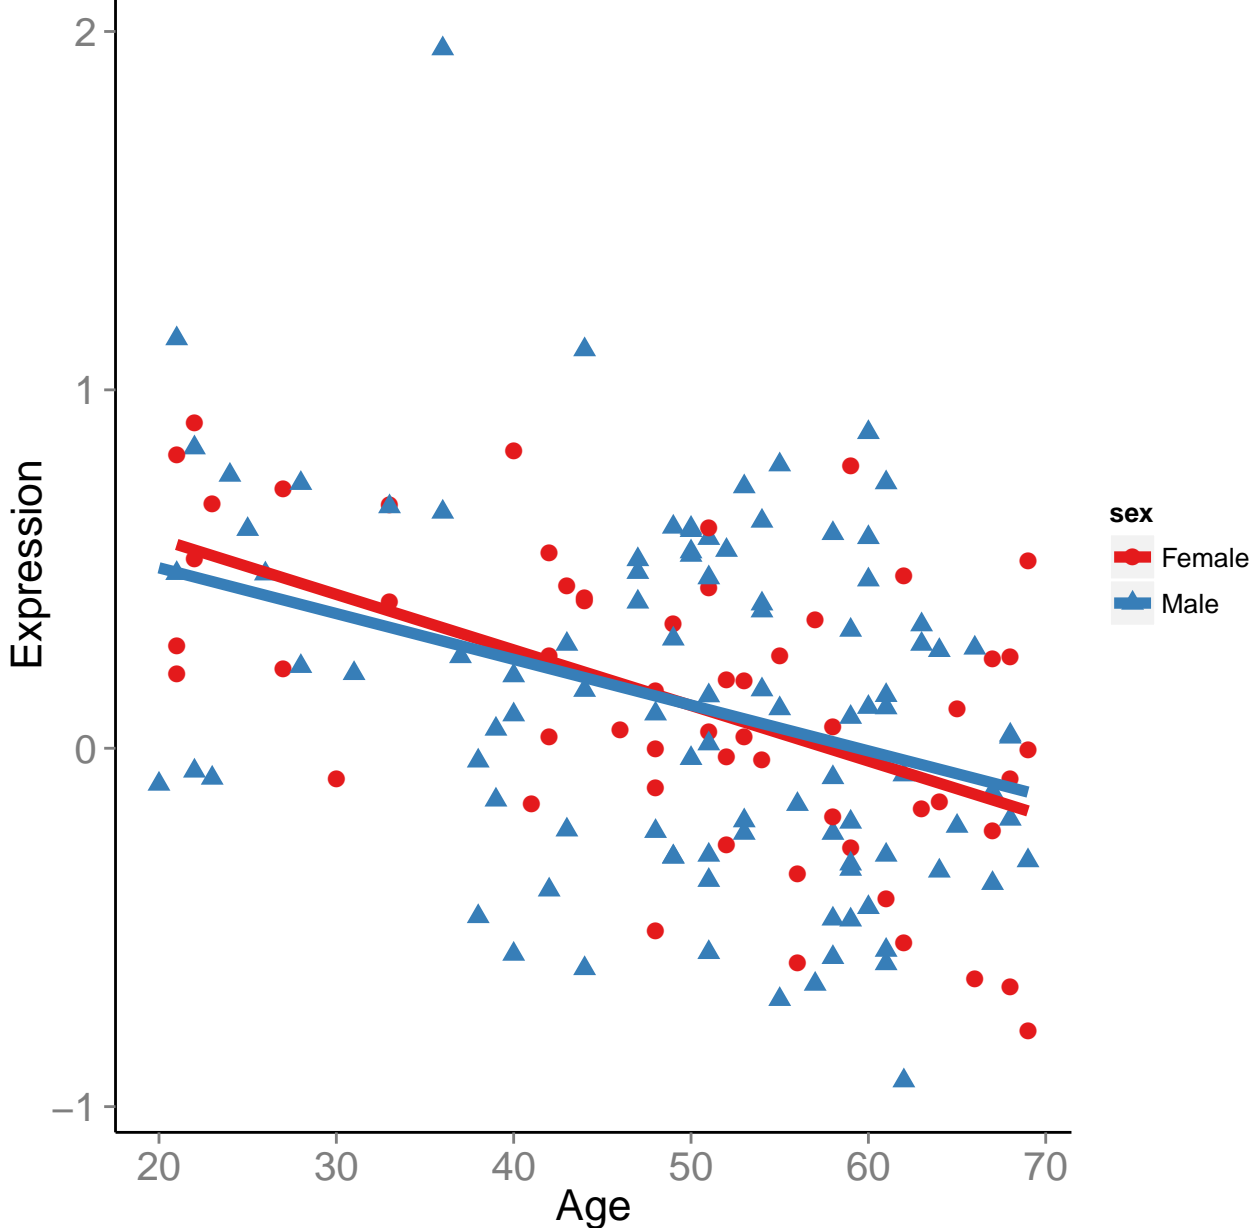

Blood: FNIP2 Pearson-R=0.40 Pval=2.41E-07

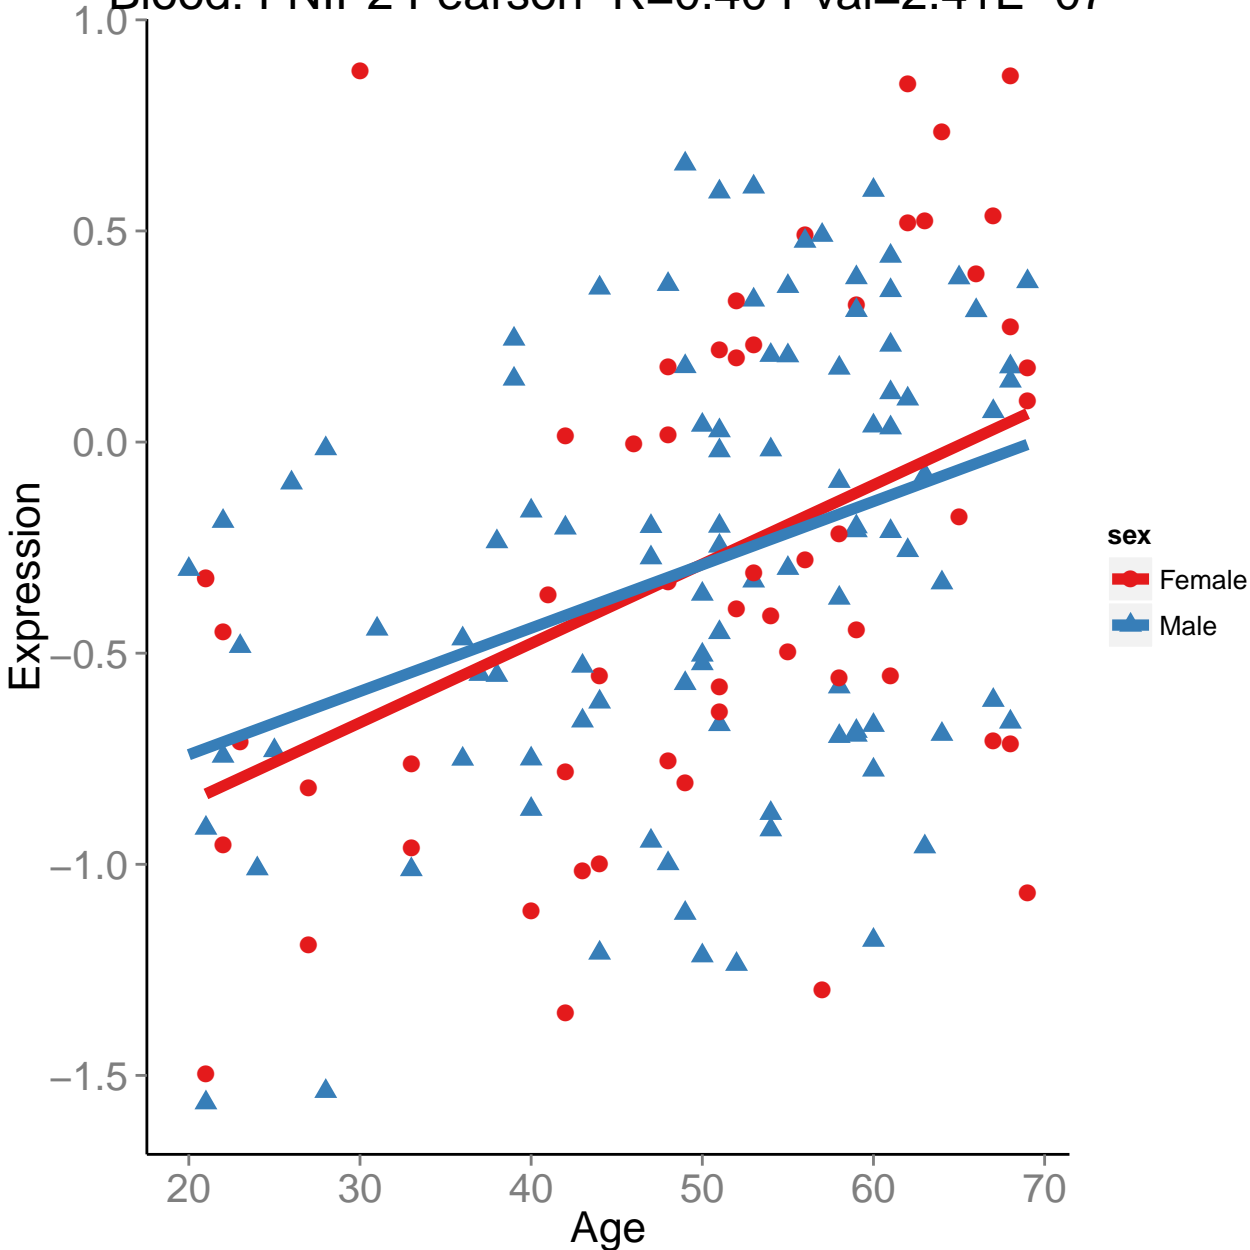

Blood: HSPA5 Pearson-R=0.40 Pval=1.92E-07

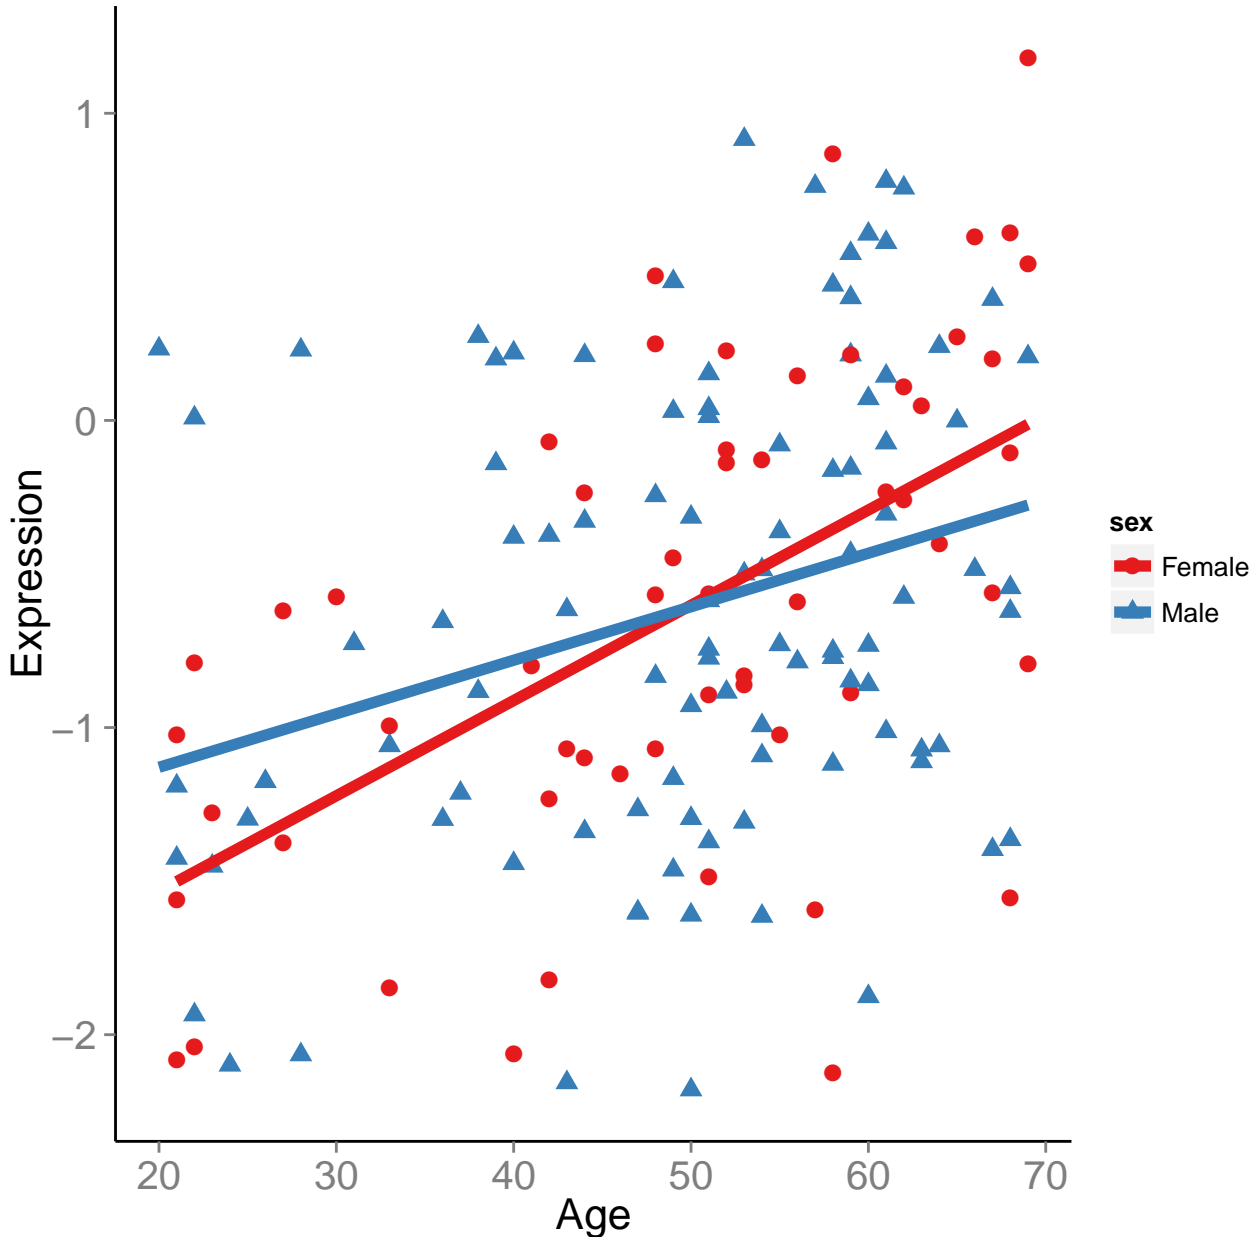



Blood: AC069363.1 Pearson-R=0.40 Pval=2.08E-07

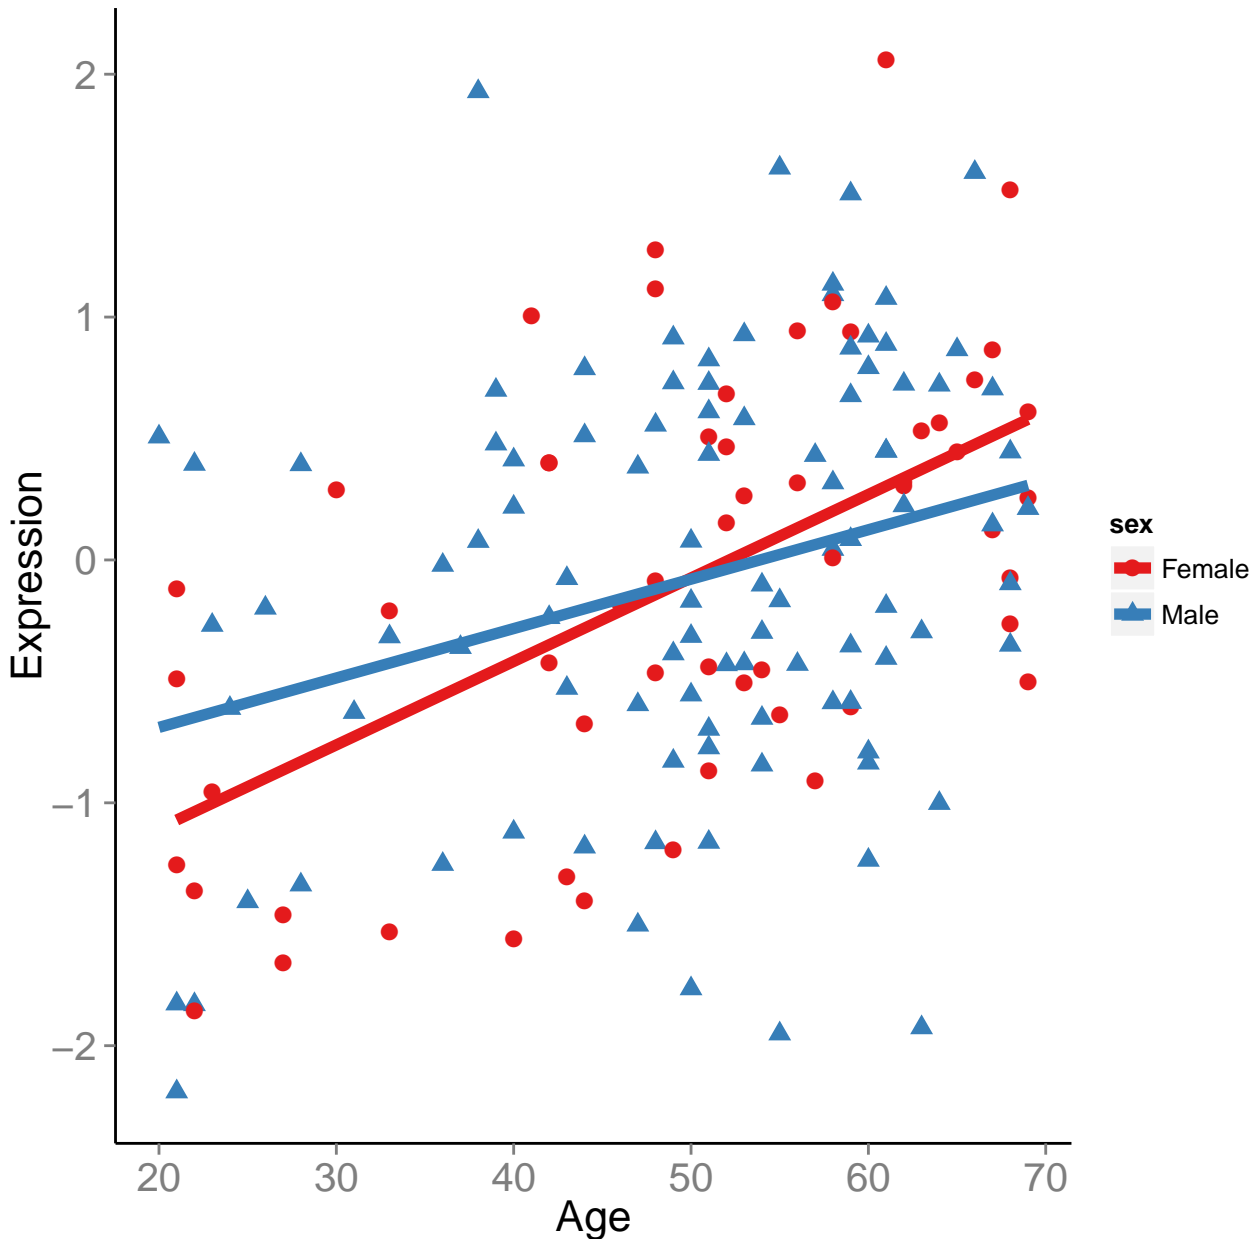

Blood: KAT6A Pearson-R=0.40 Pval=2.24E-07

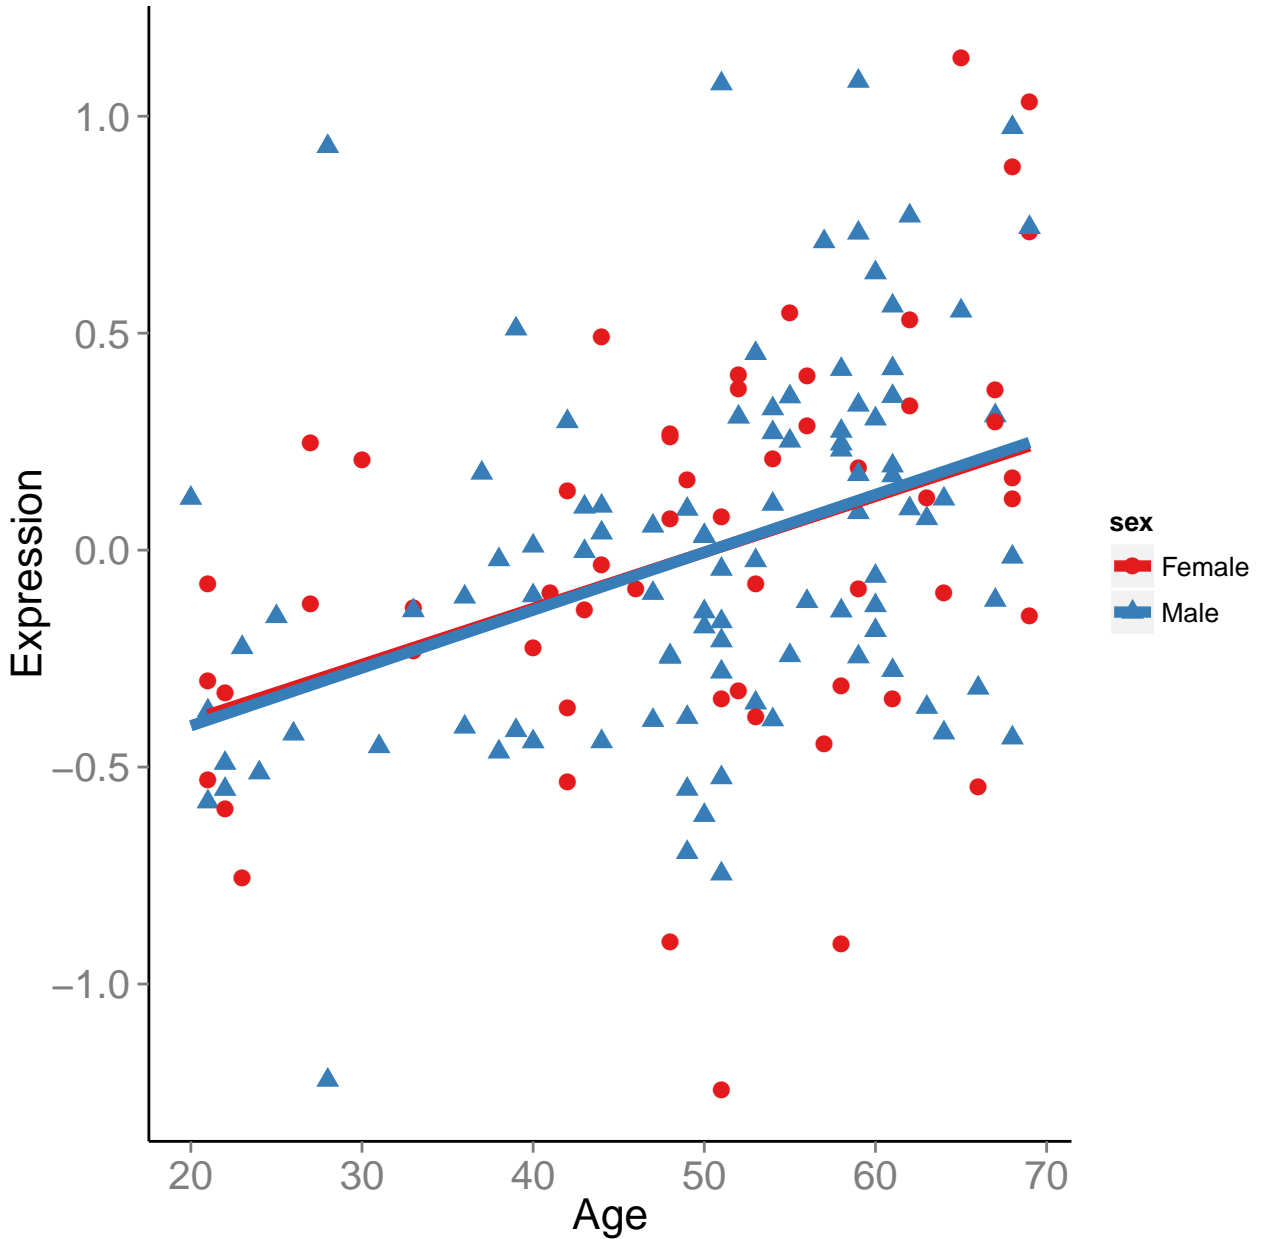

Blood: CCNYL1 Pearson-R=-0.40 Pval=2.11E-07

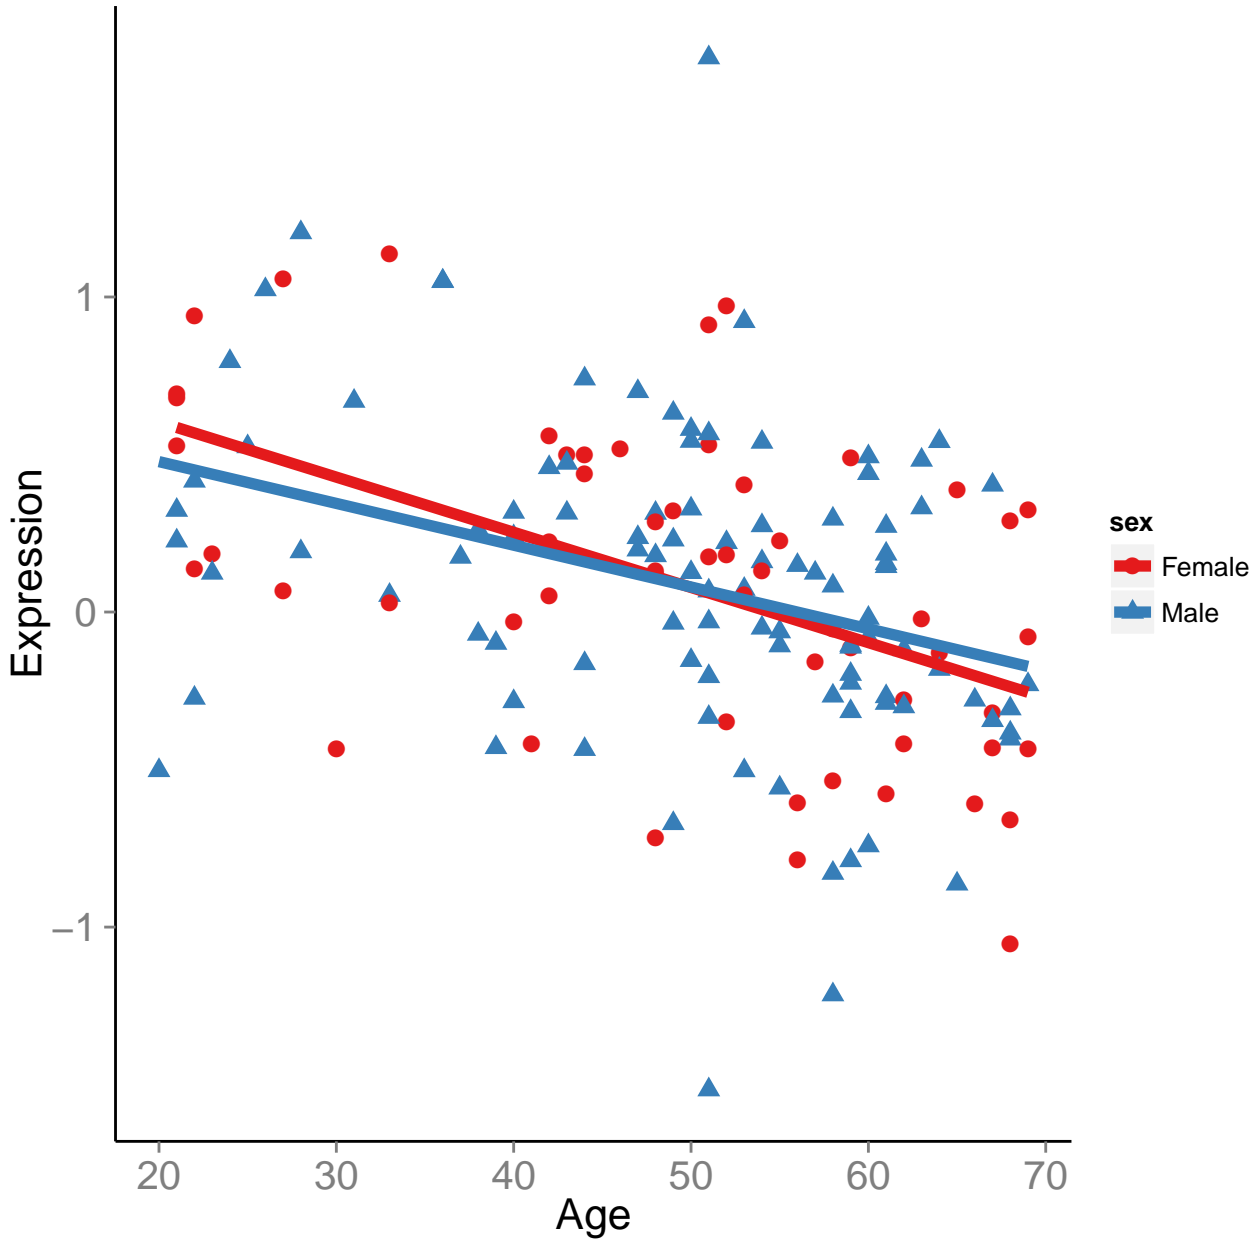

Blood: C9orf46 Pearson-R=-0.40 Pval=2.41E-07

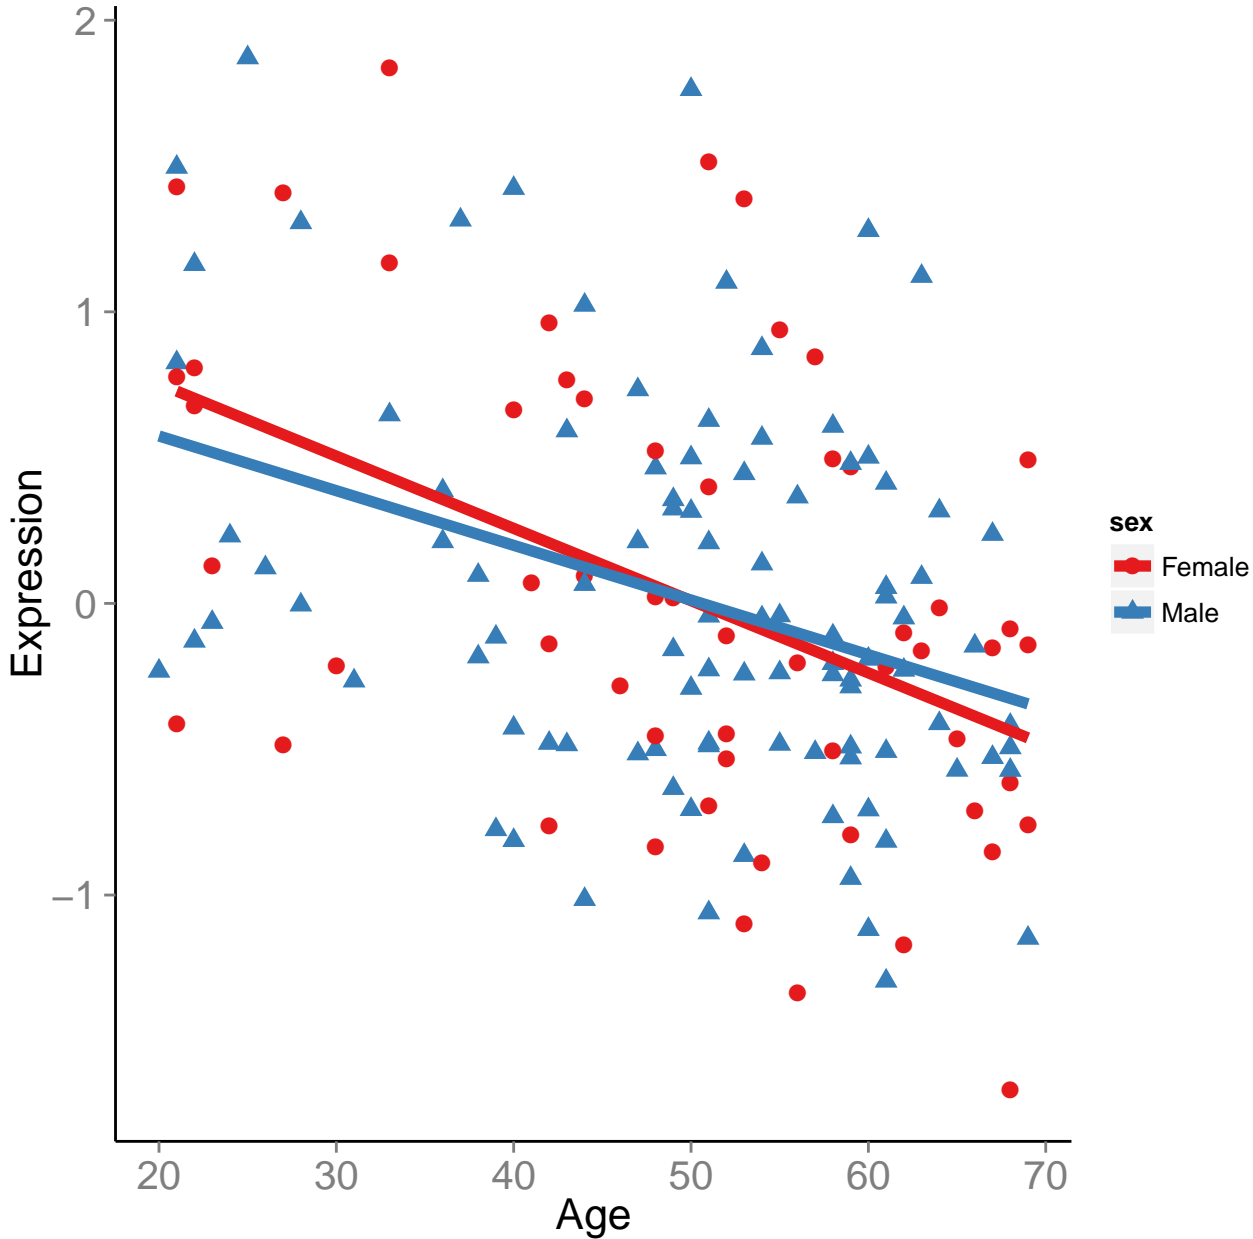

Blood: ILKAP Pearson-R=0.40 Pval=1.95E-07

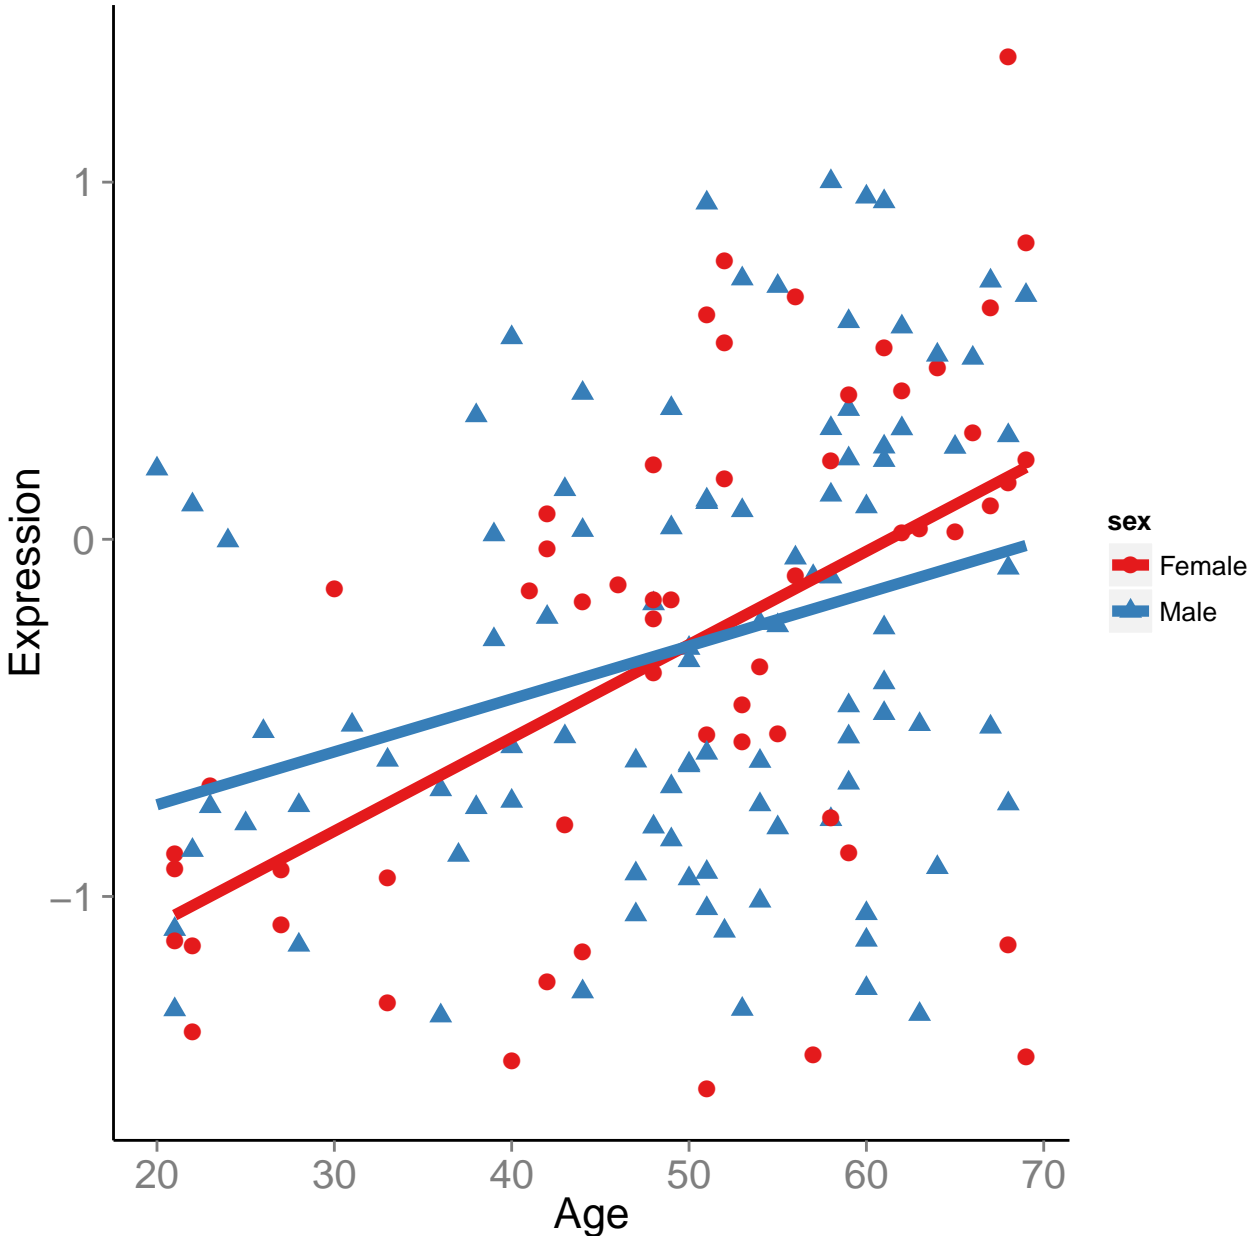

Blood: FAM210A Pearson-R=0.40 Pval=2.34E-07

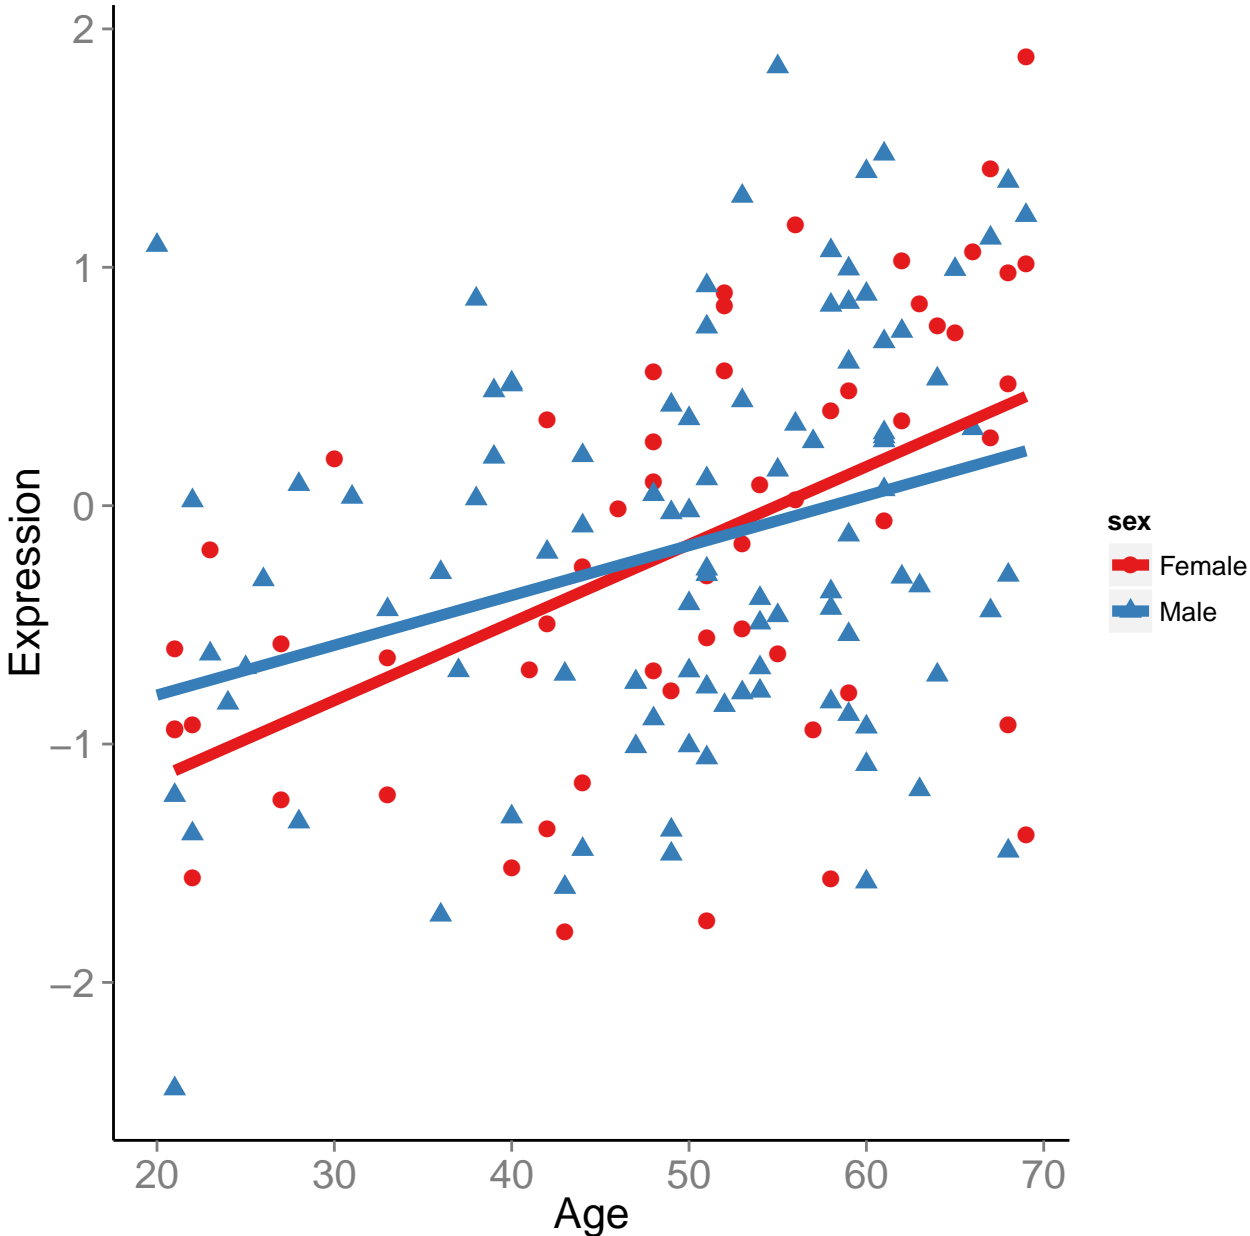

Blood: CTSW Pearson-R=0.40 Pval=1.97E-07

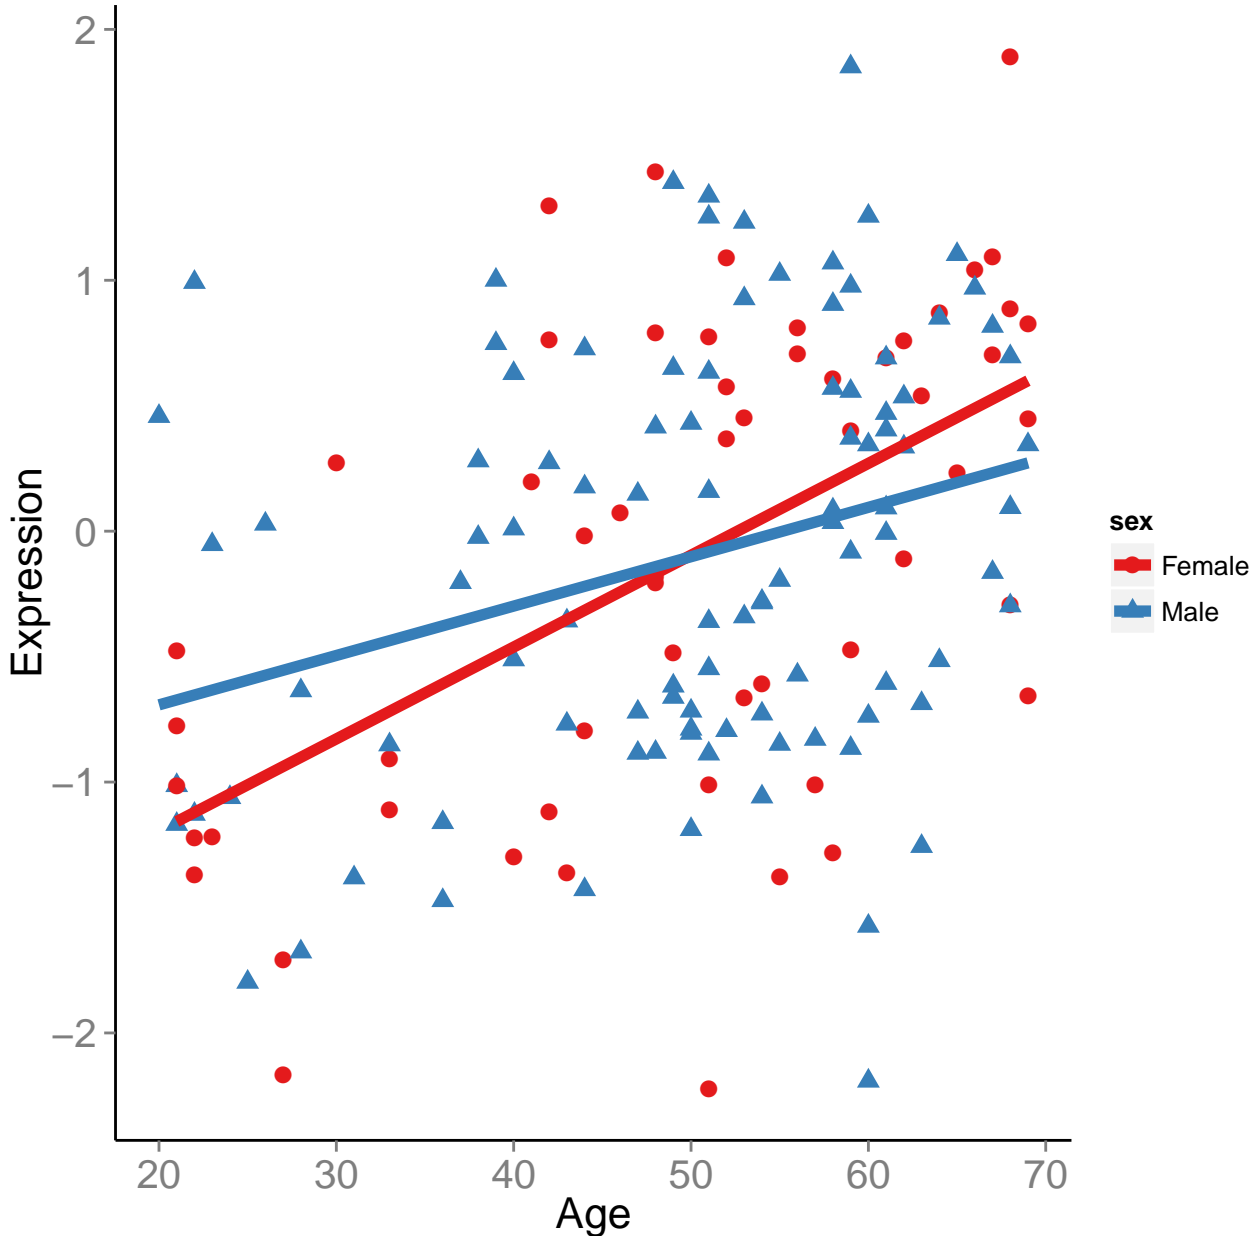

Blood: RAB5B Pearson-R=-0.40 Pval=2.23E-07

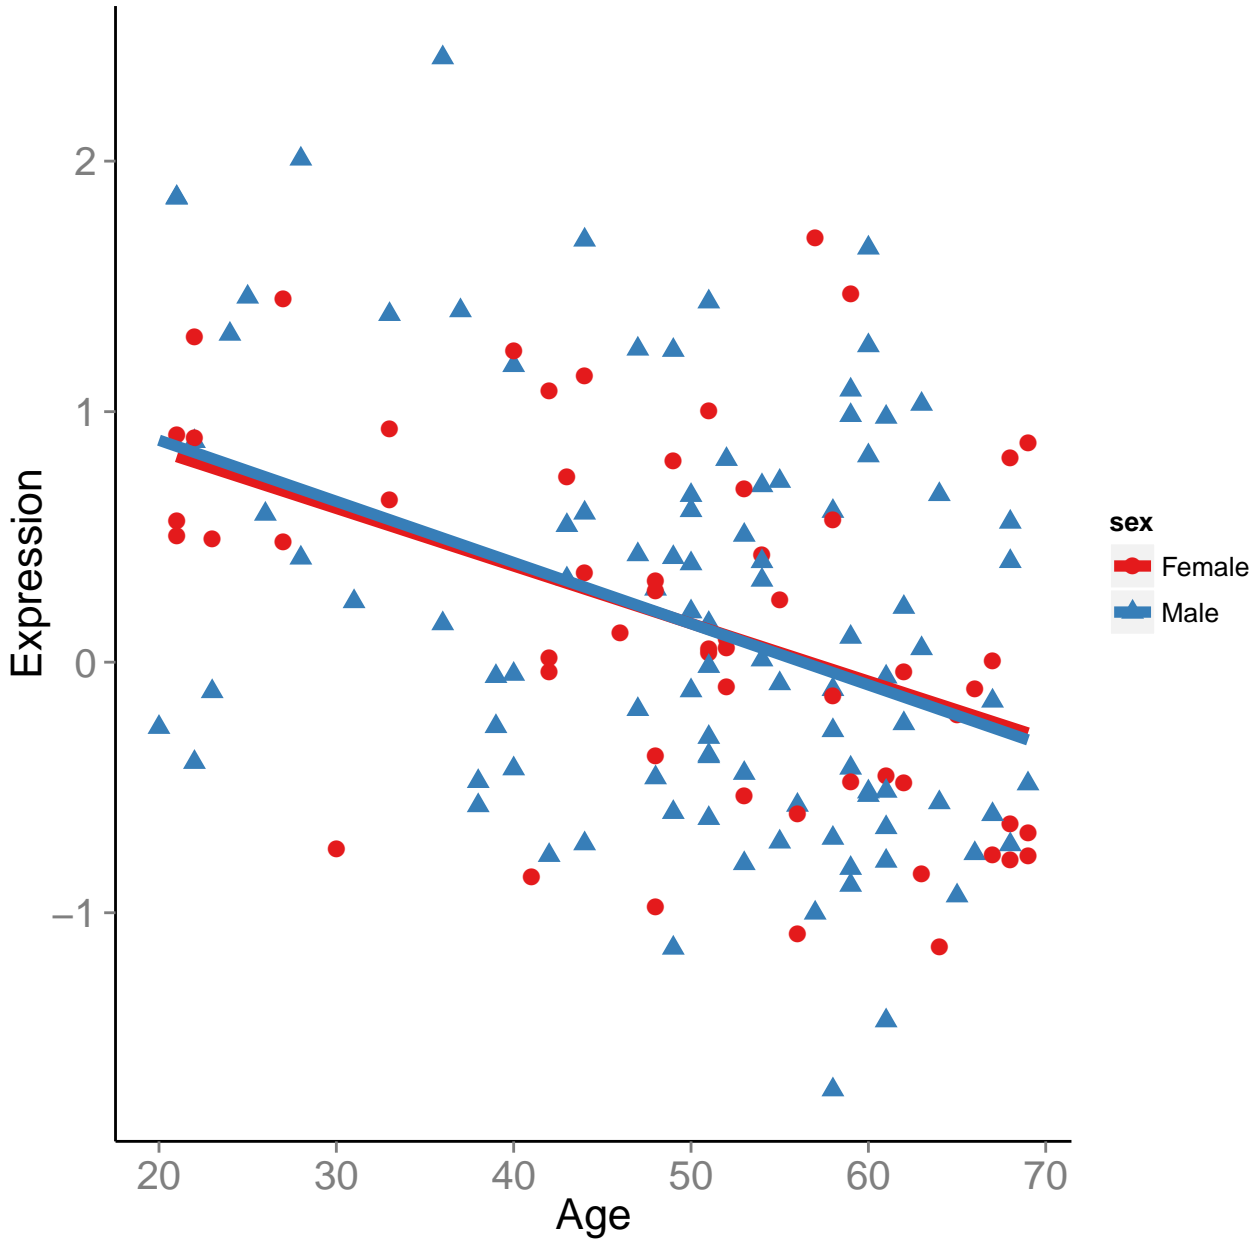



Blood: LGR6 Pearson-R=0.40 Pval=2.18E-07

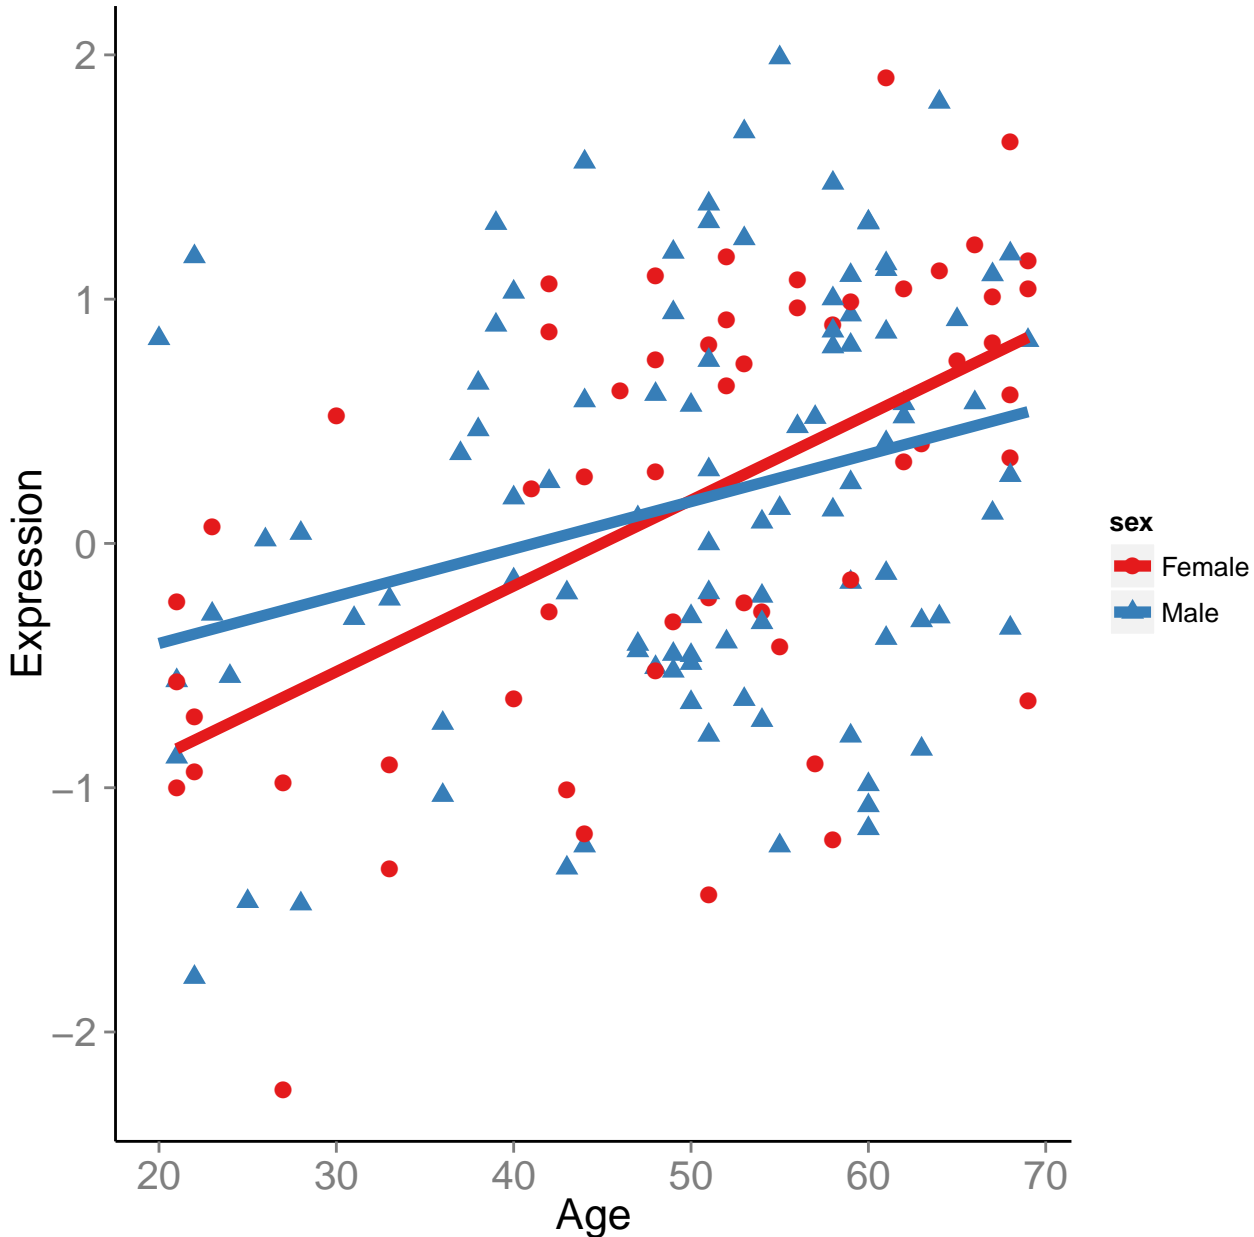

Blood: NR2C2 Pearson-R=0.40 Pval=2.16E-07

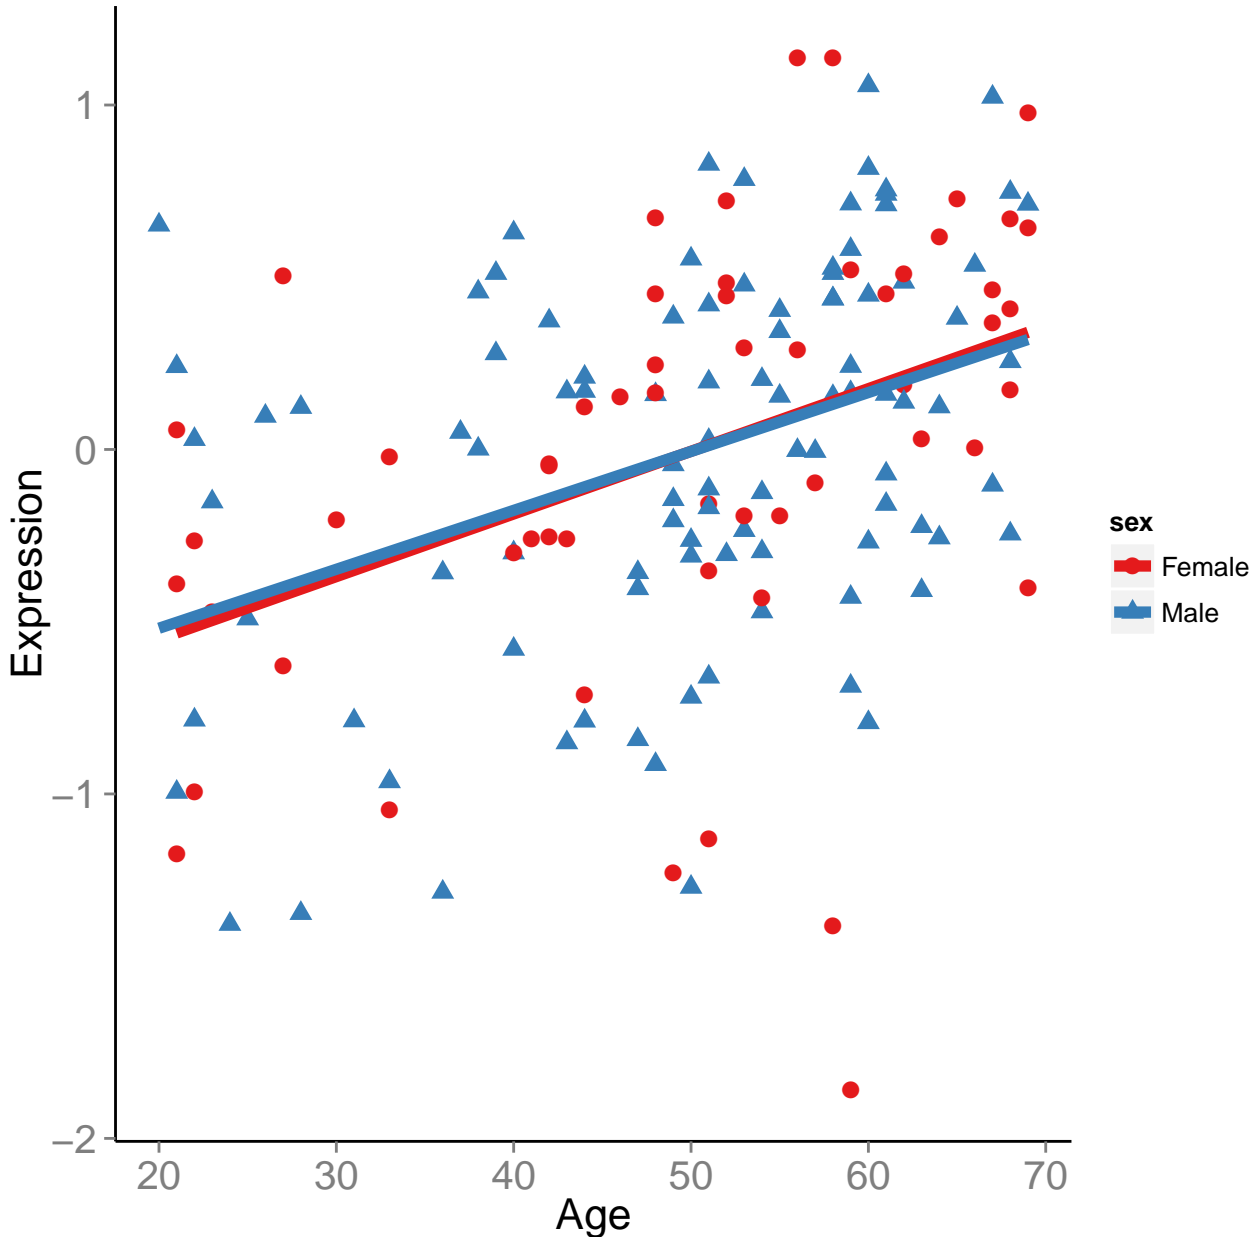

Blood: MAP4K5 Pearson-R=0.40 Pval=2.24E-07

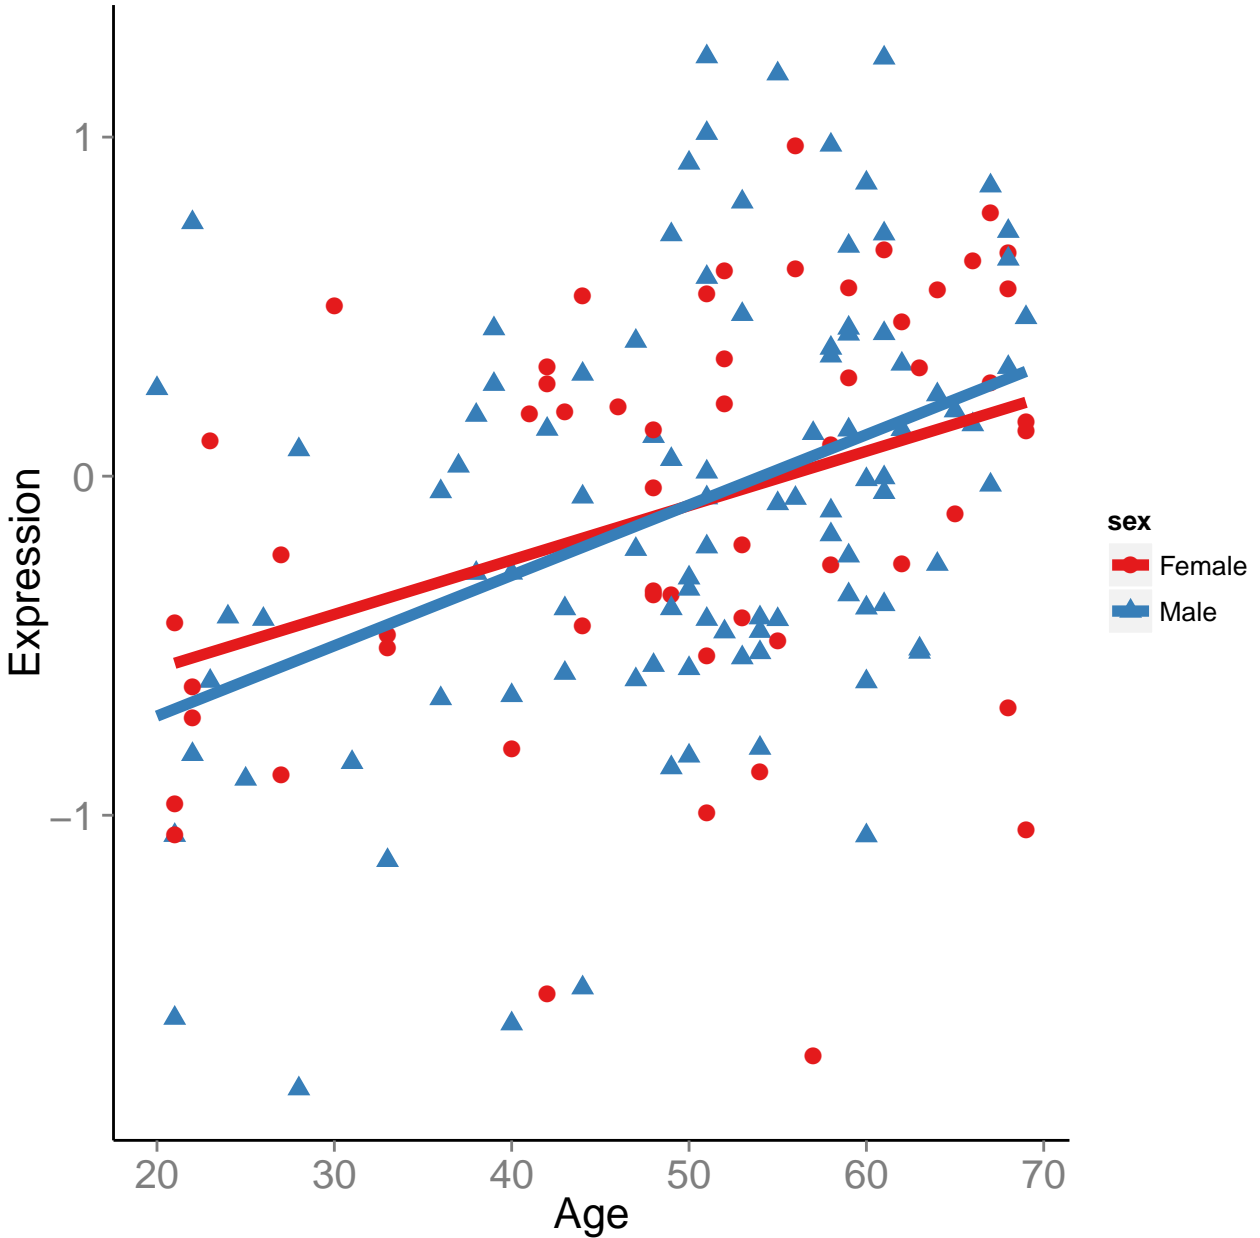

Blood: SPCS3 Pearson-R=-0.40 Pval=2.40E-07

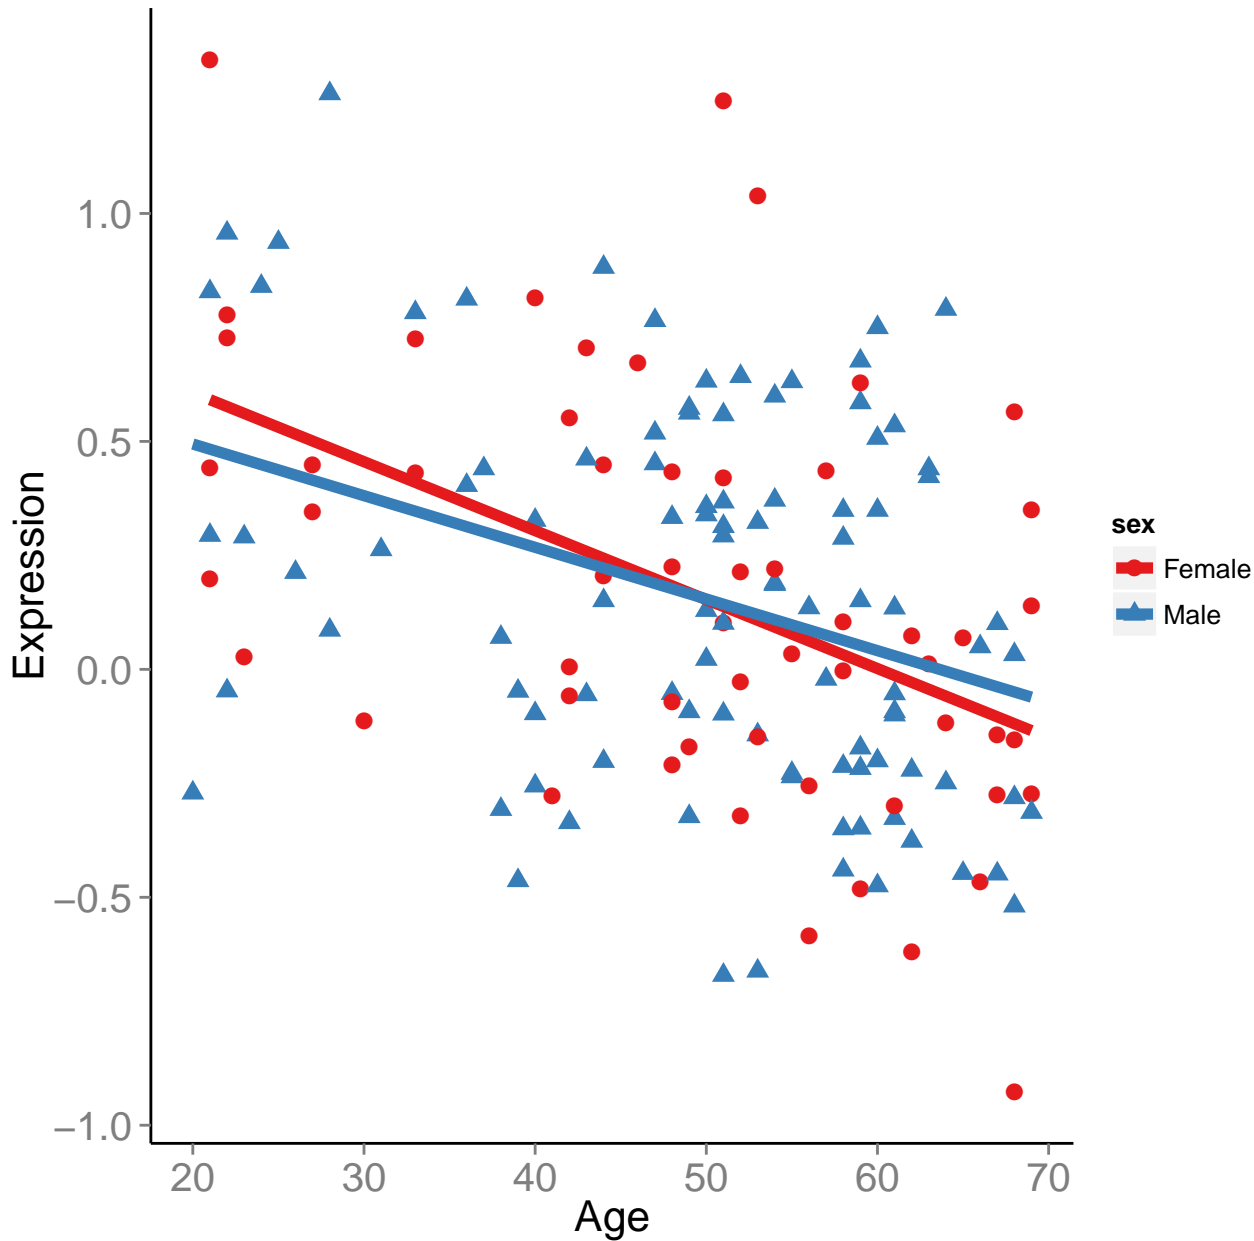

Blood: LLGL2 Pearson-R=0.40 Pval=1.90E-07

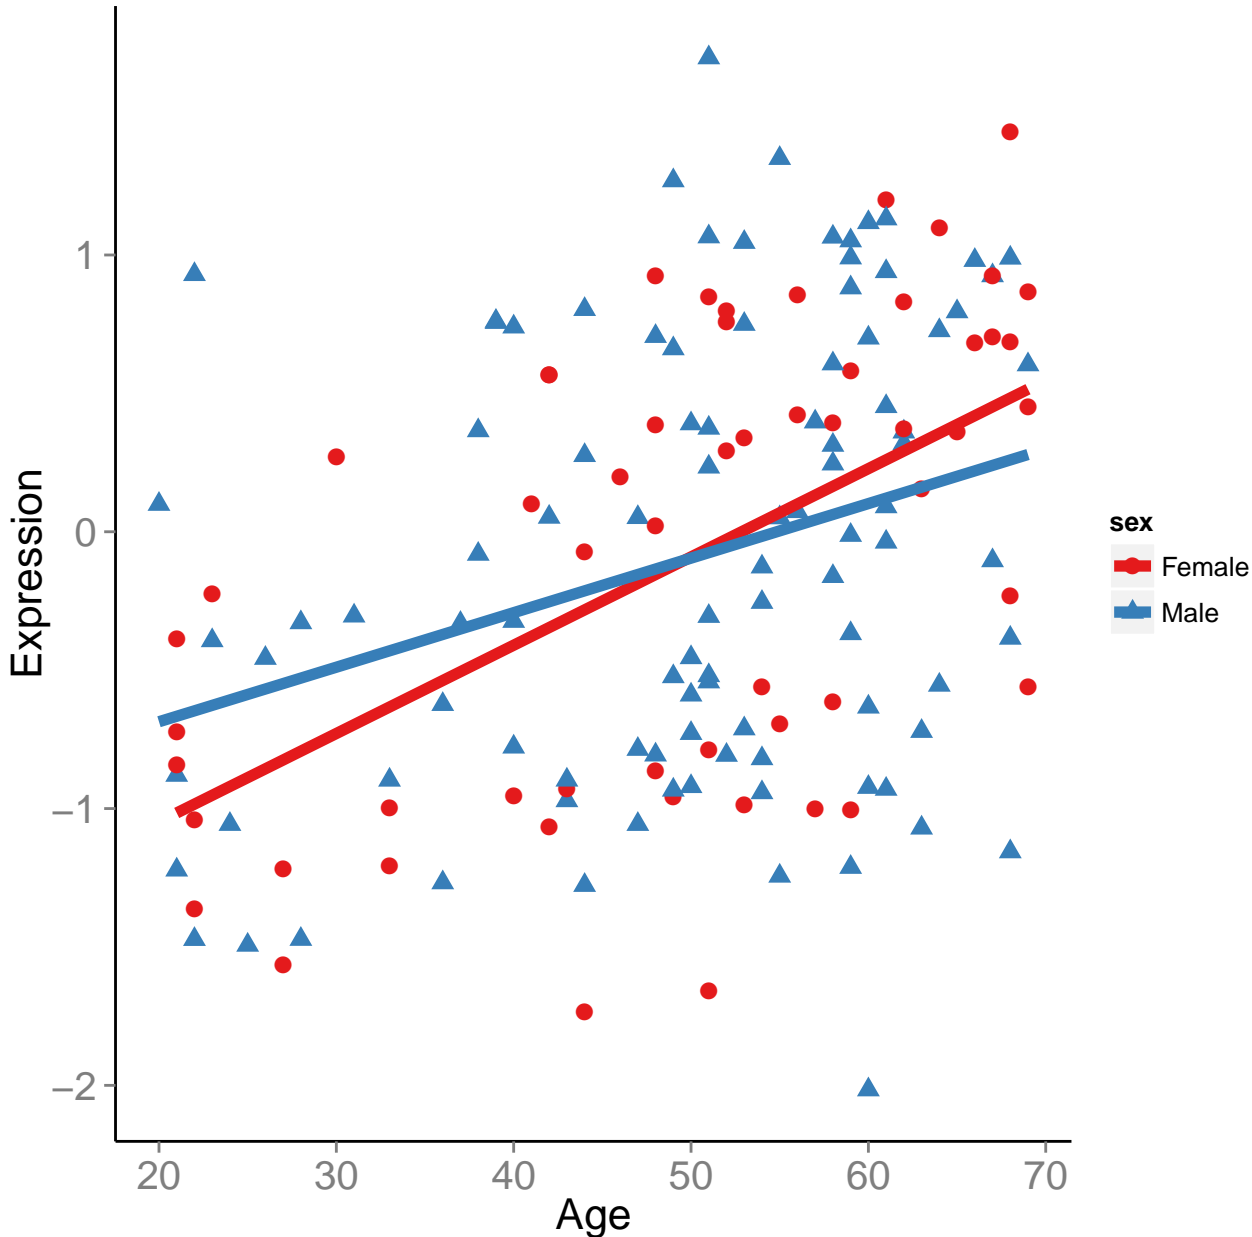

Blood: CDC42 Pearson-R=-0.40 Pval=2.01E-07

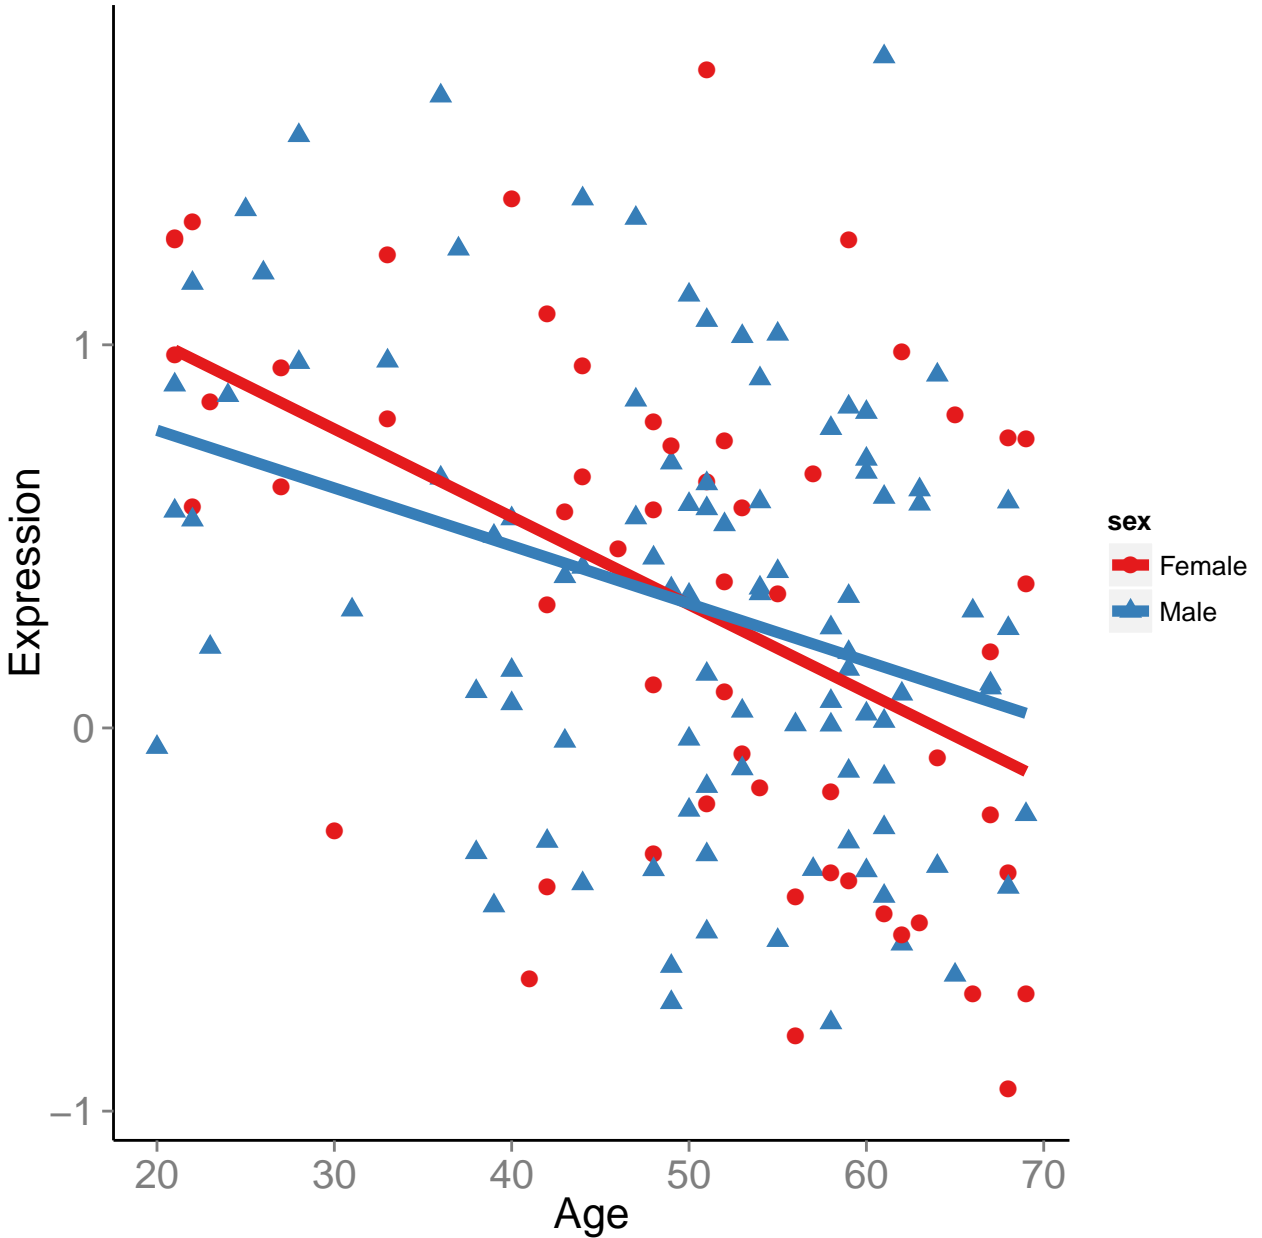

Blood: AHCYL1 Pearson-R=-0.40 Pval=2.30E-07

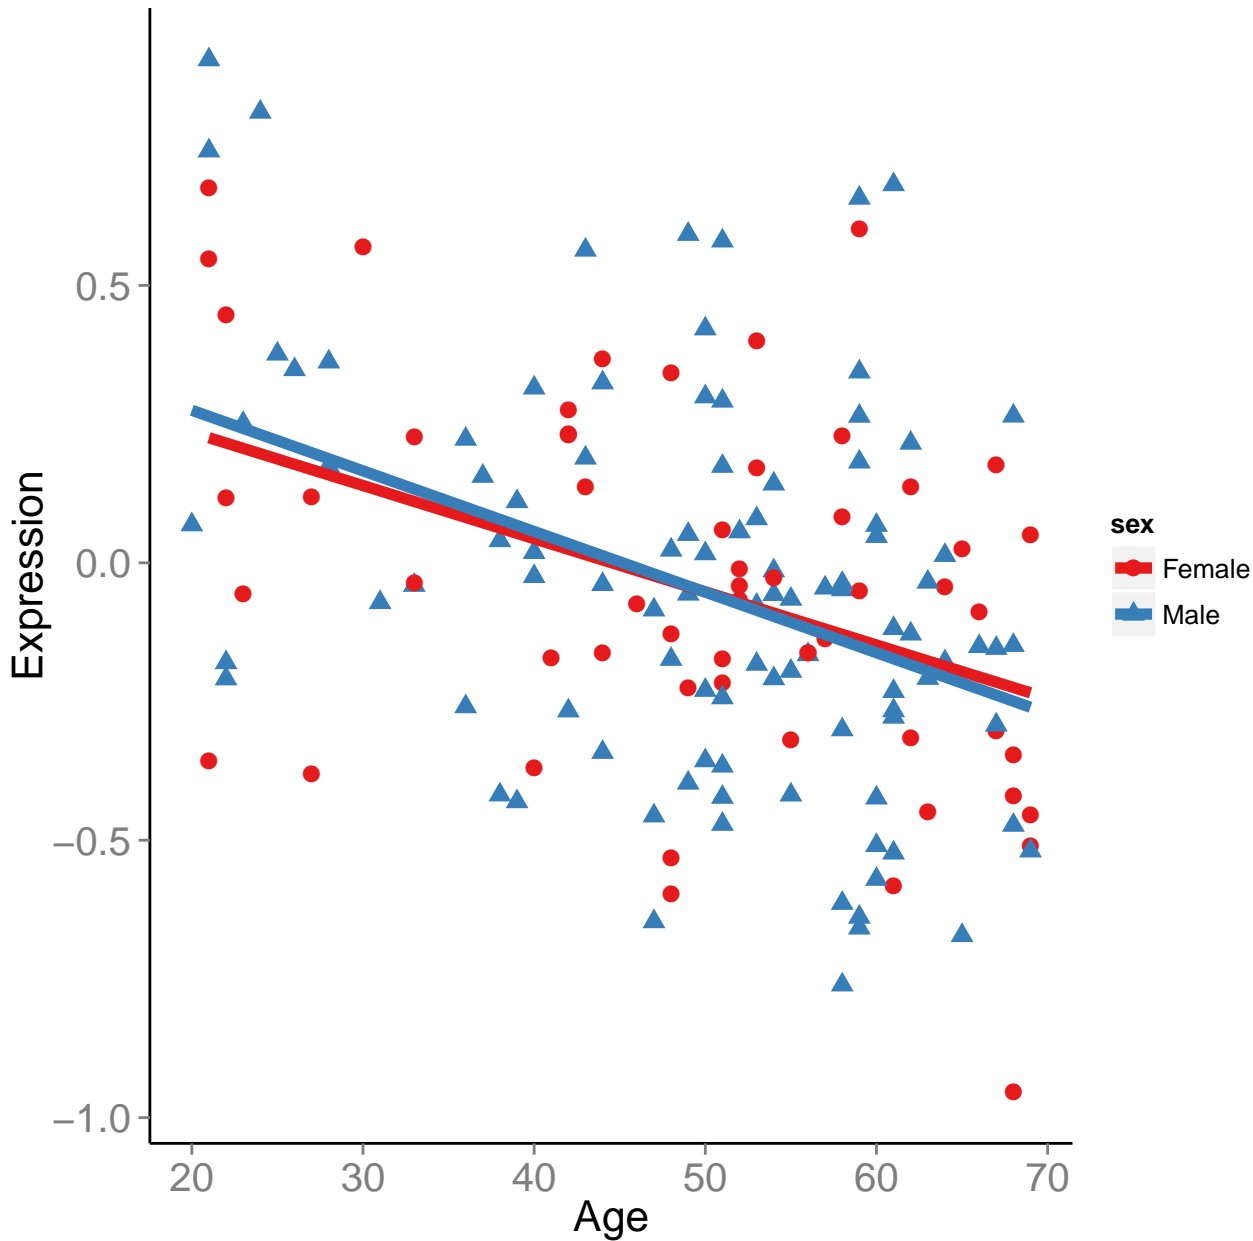

Blood: AGPAT4 Pearson-R=0.40 Pval=2.42E-07

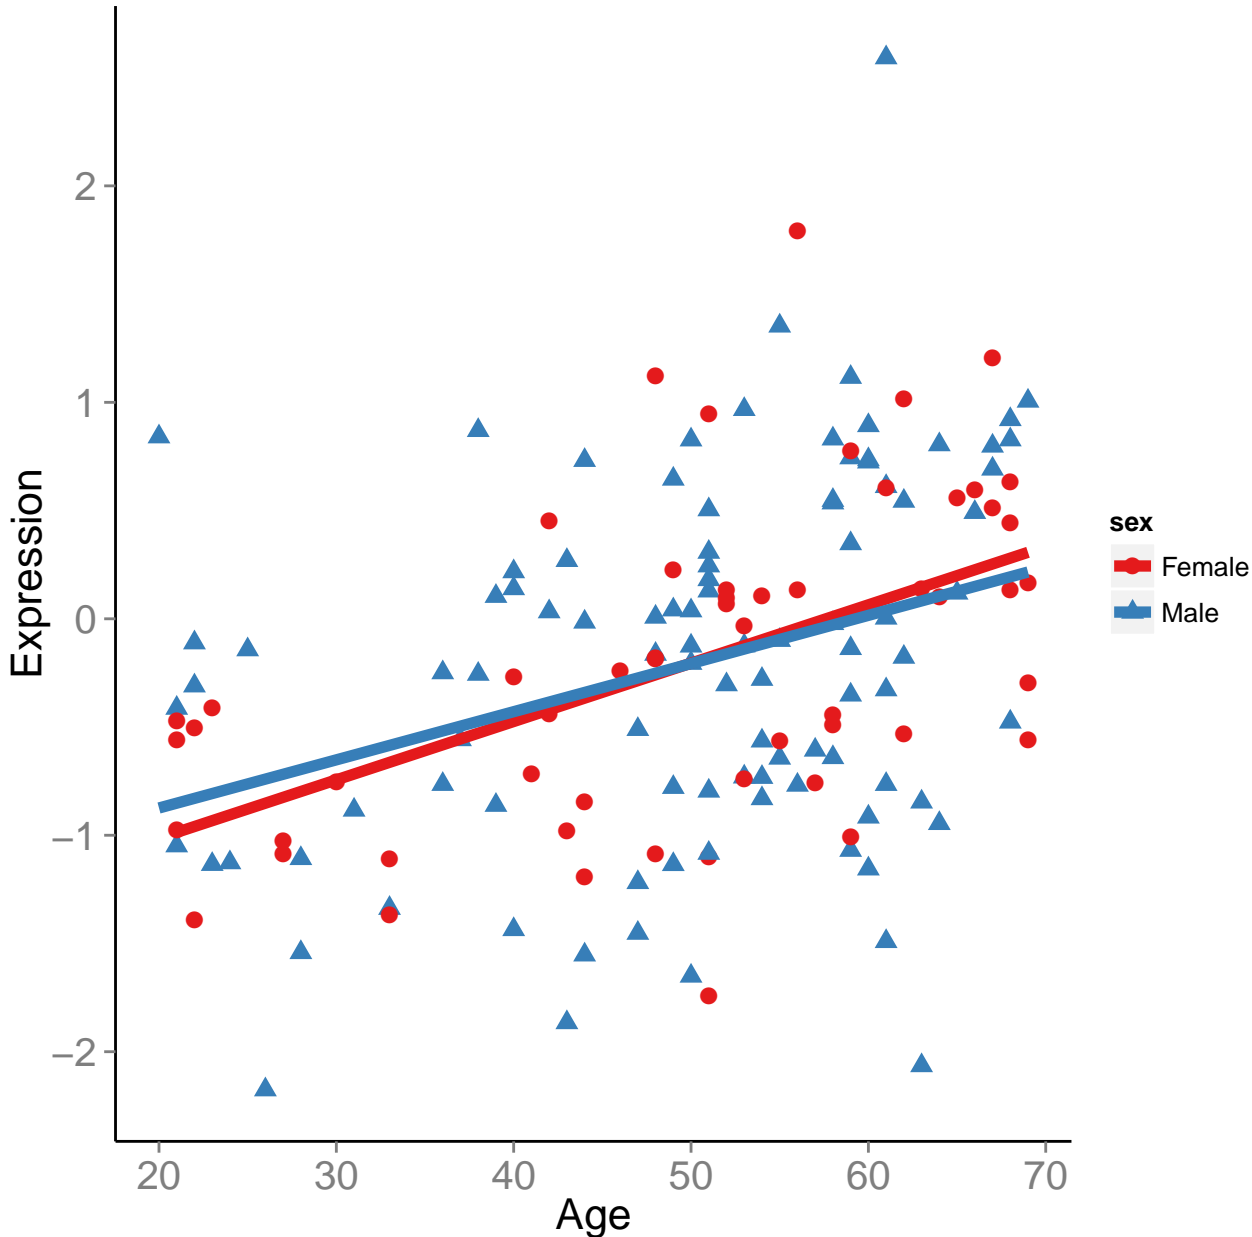



Blood: MAD1L1 Pearson-R=0.40 Pval=2.62E-07

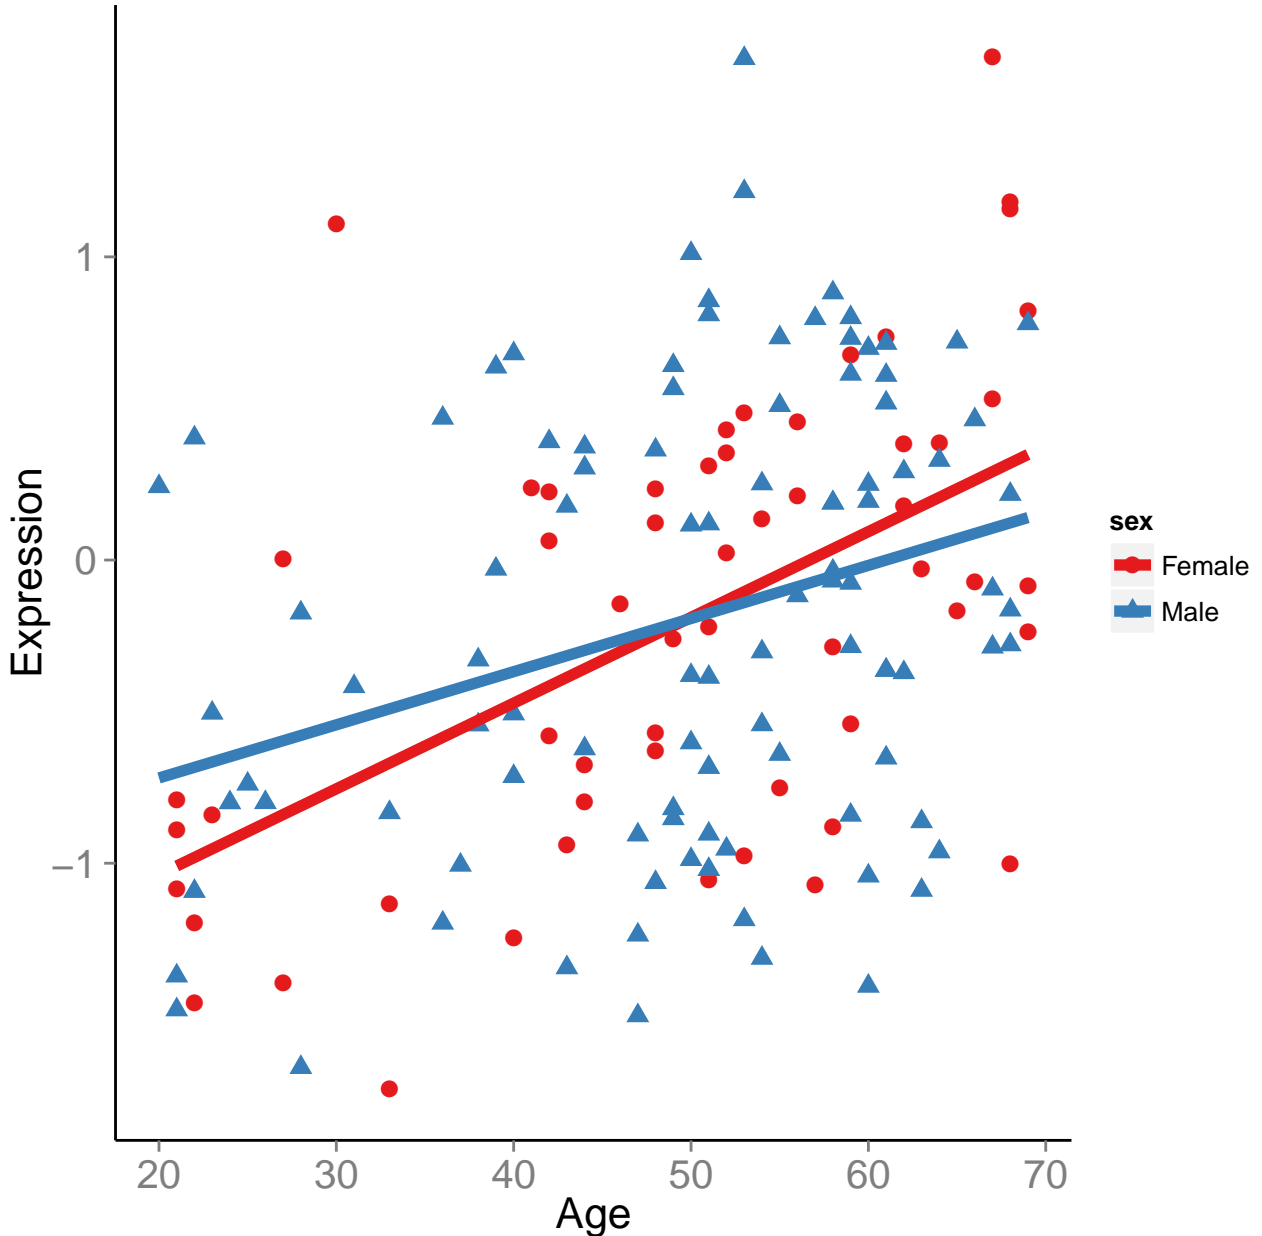

Blood: DPP7 Pearson-R=0.40 Pval=2.64E-07

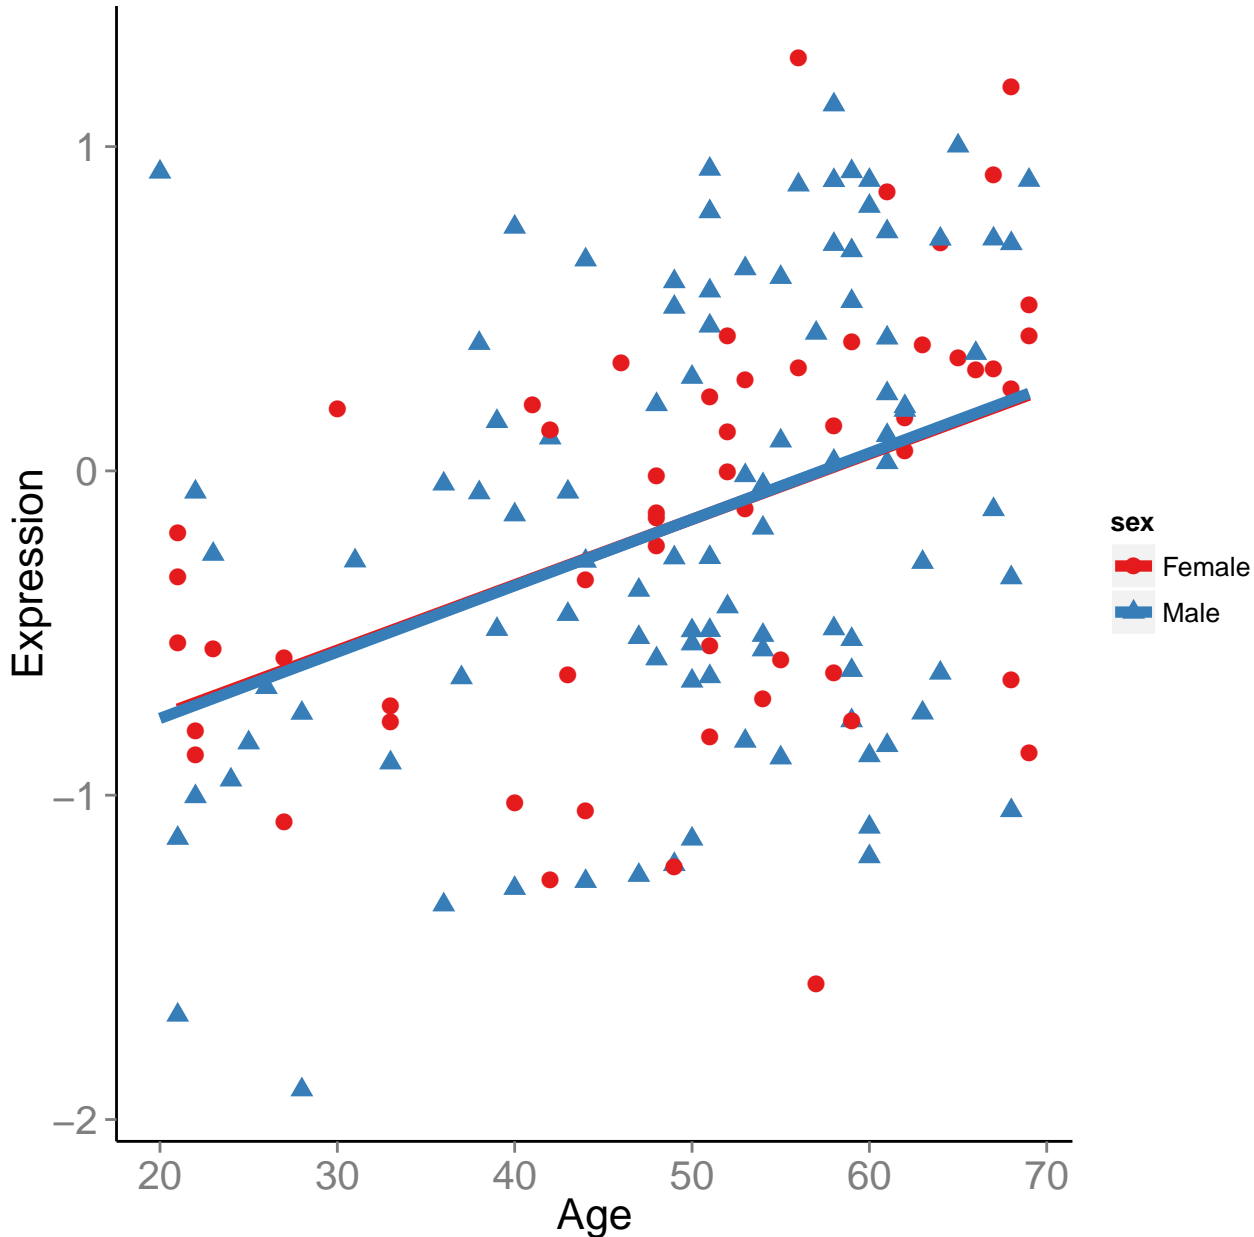

Blood: CMC1 Pearson-R=0.40 Pval=2.65E-07

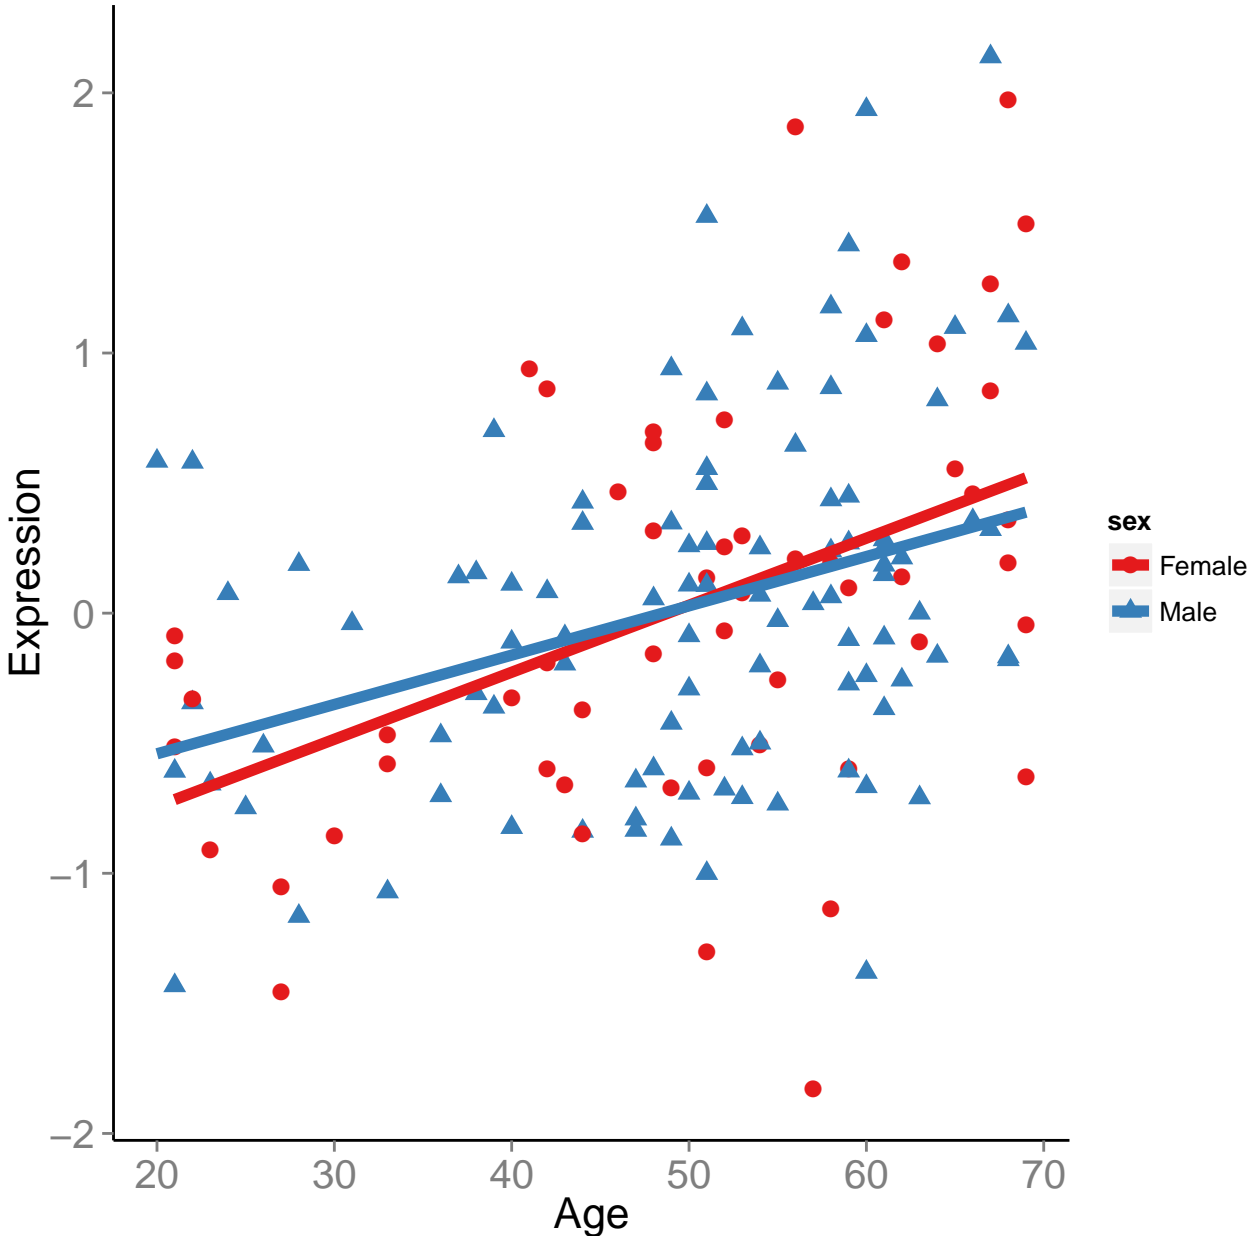

Blood: GALNT1 Pearson-R=-0.40 Pval=2.86E-07

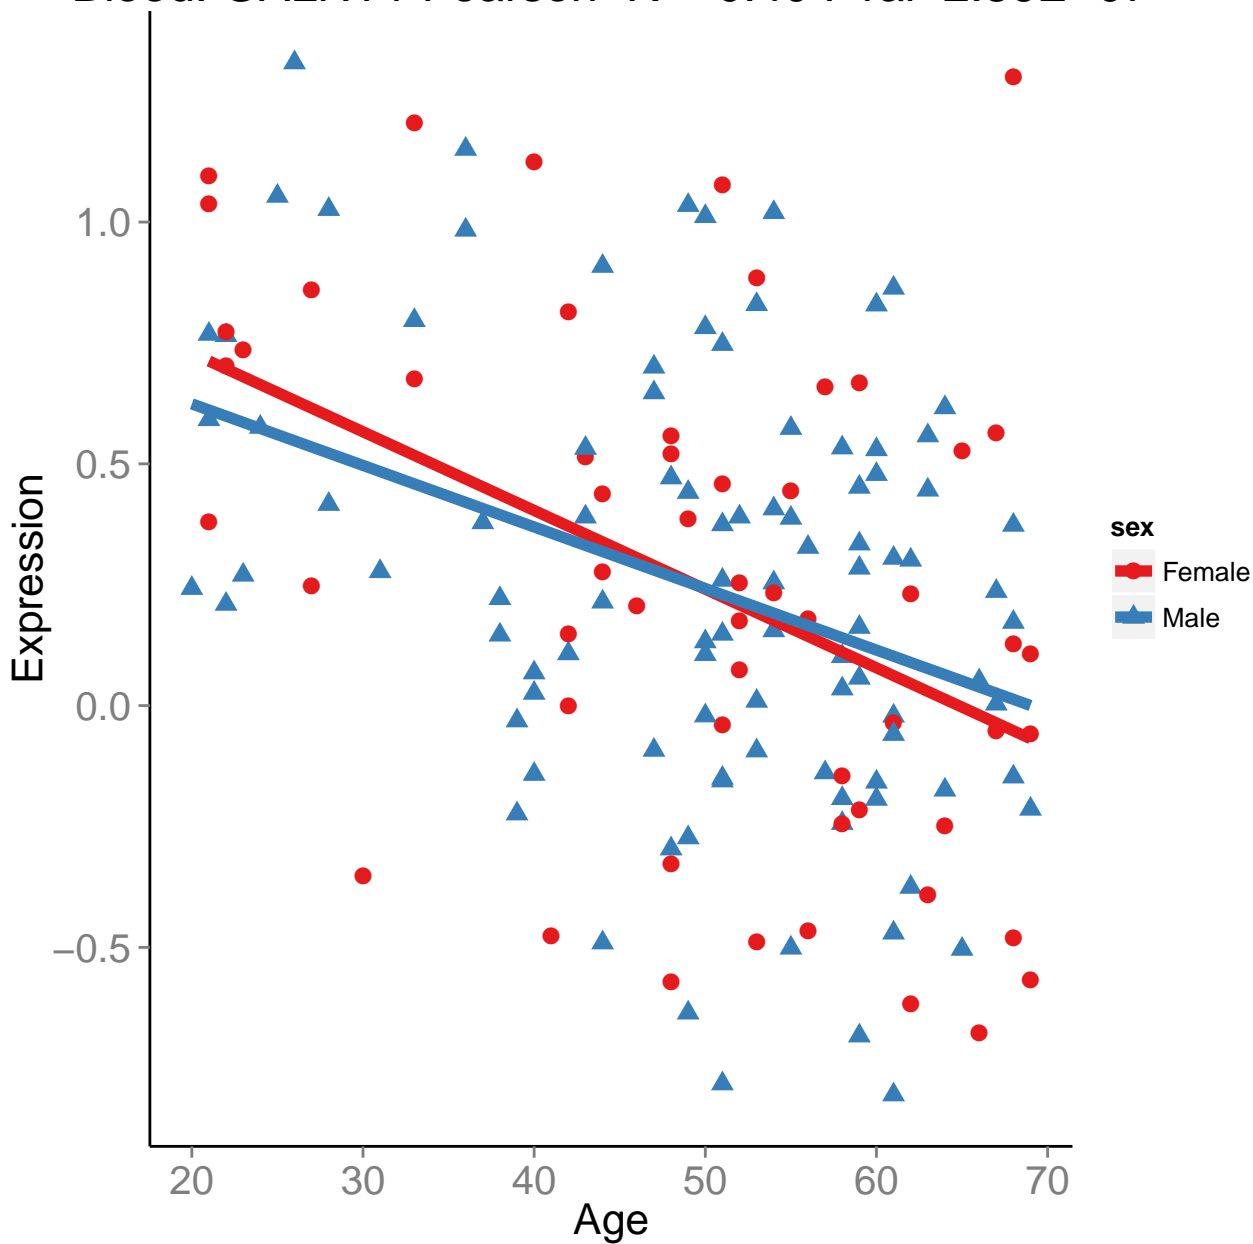

Blood: ENOPH1 Pearson-R=0.40 Pval=2.83E-07

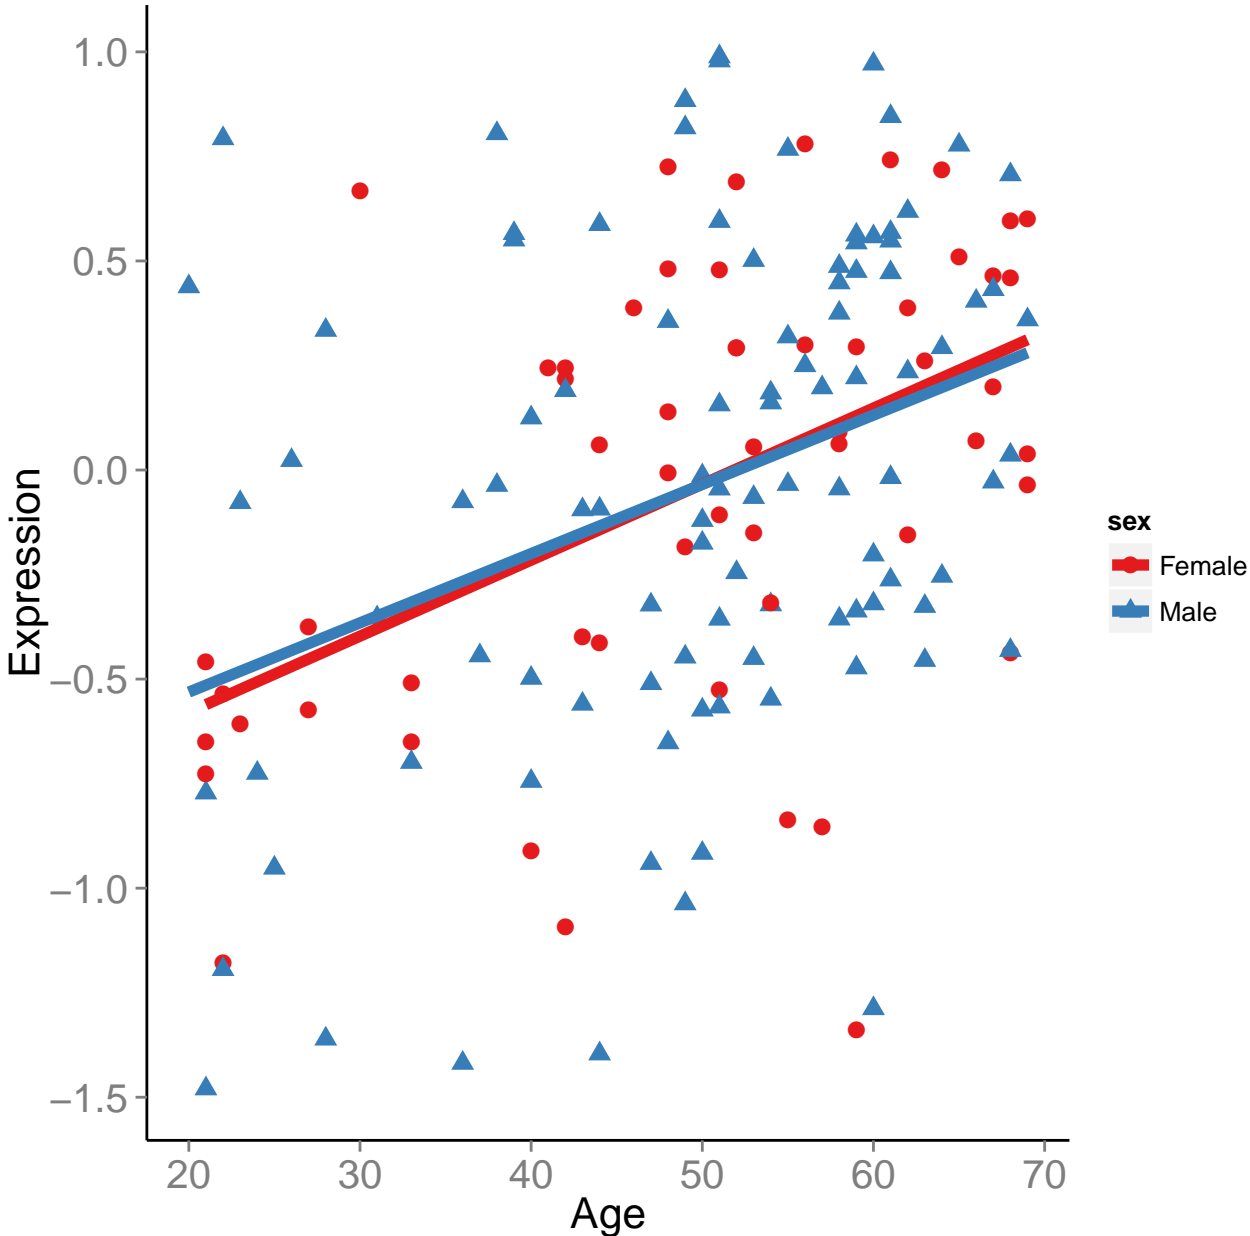

Blood: CLK1 Pearson-R=0.40 Pval=2.88E-07

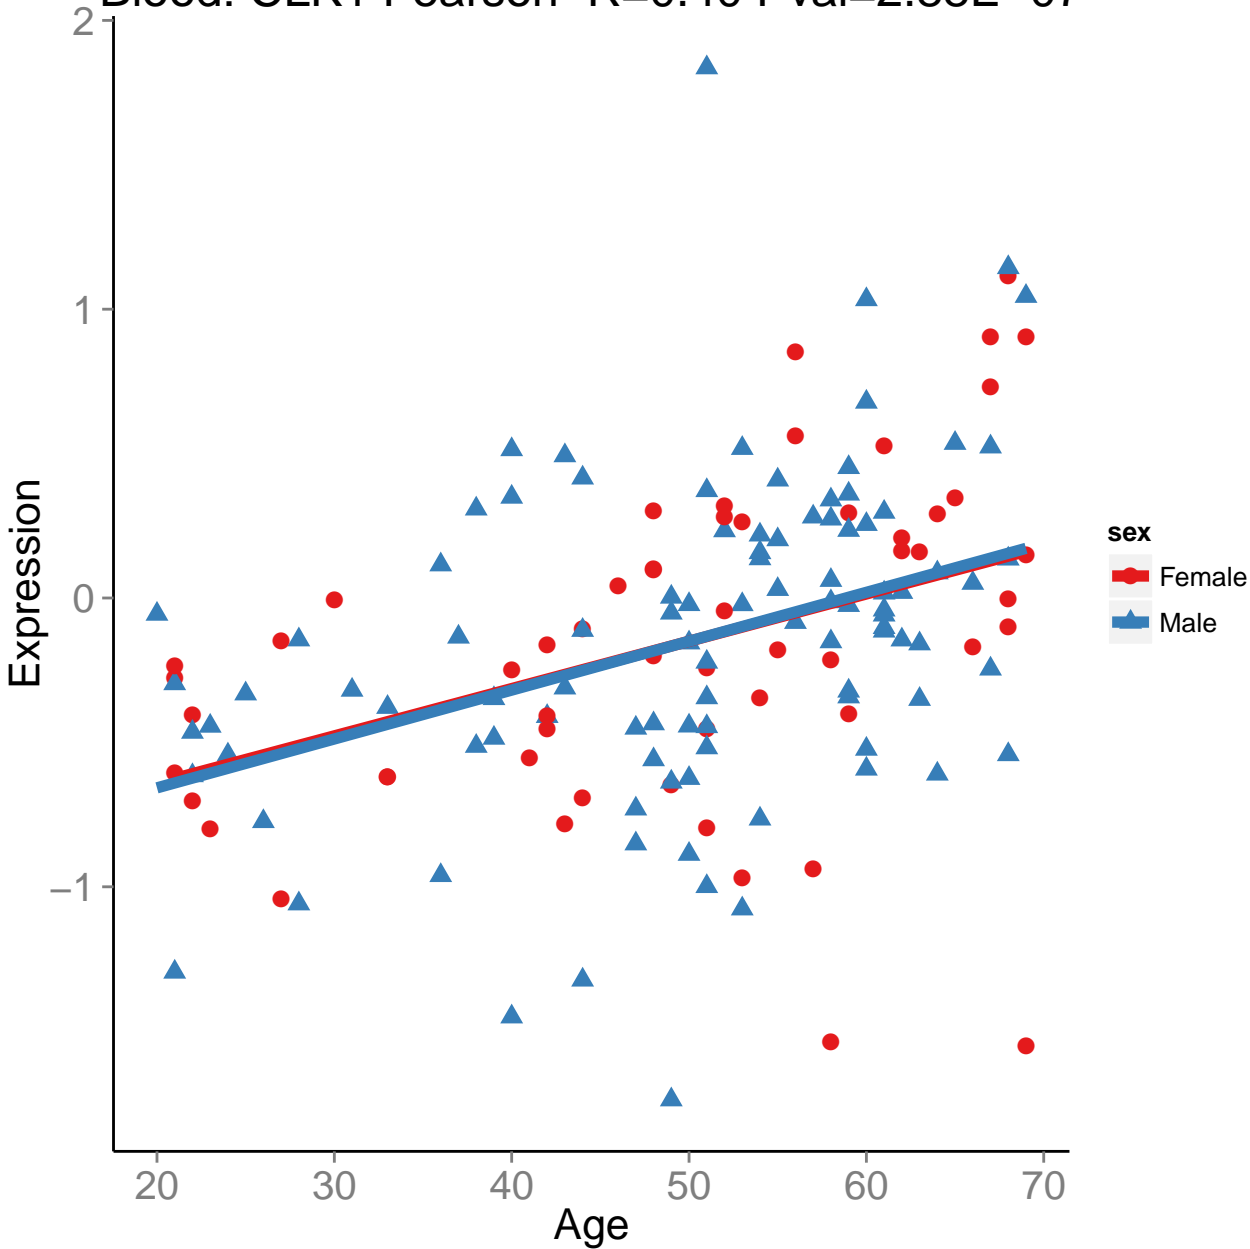

Blood: RNF8 Pearson-R=0.40 Pval=2.85E-07

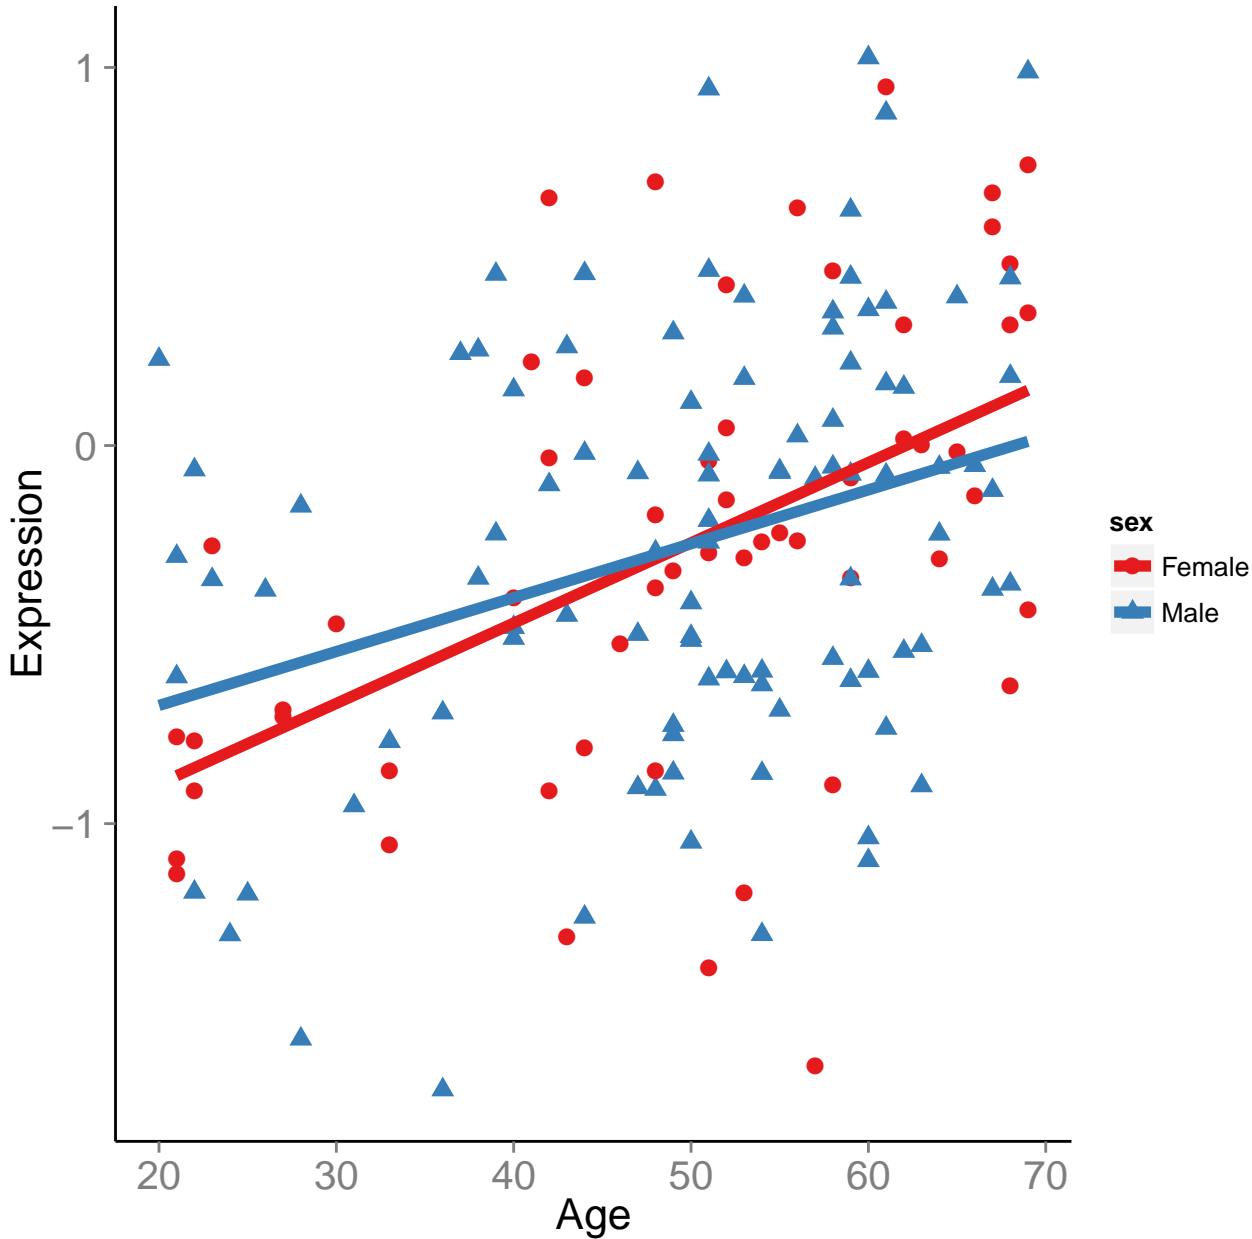

Blood: PVT1 Pearson-R=0.40 Pval=3.00E-07

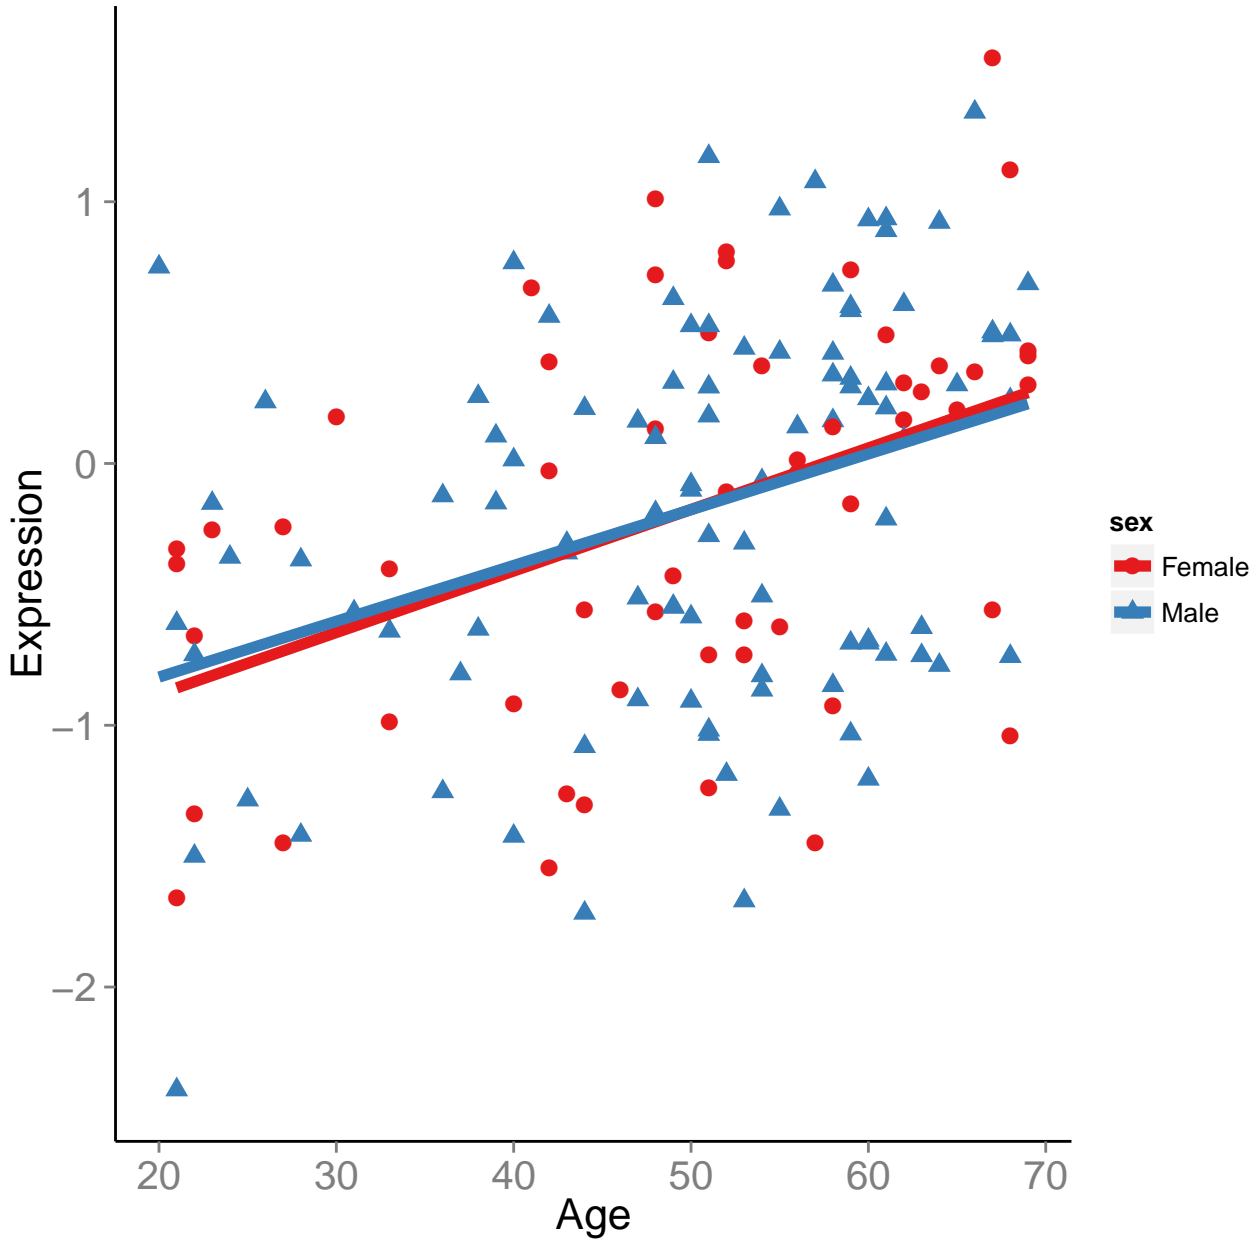



Blood: MDFIC Pearson-R=0.40 Pval=3.11E-07

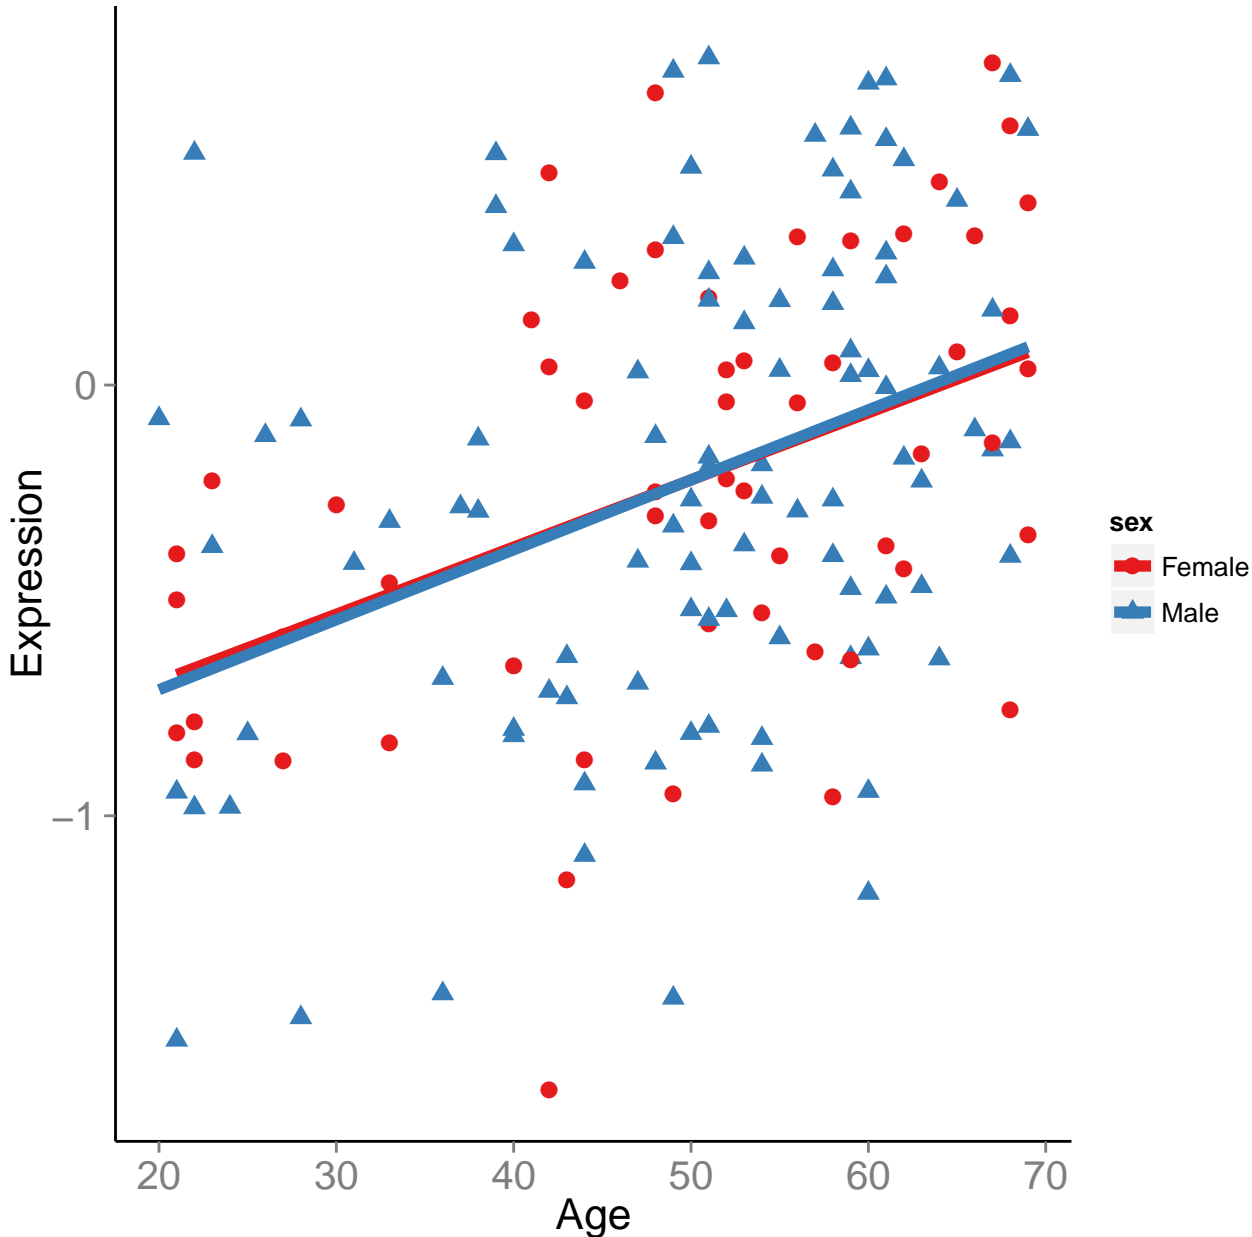

Blood: B3GAT1 Pearson-R=0.40 Pval=3.24E-07

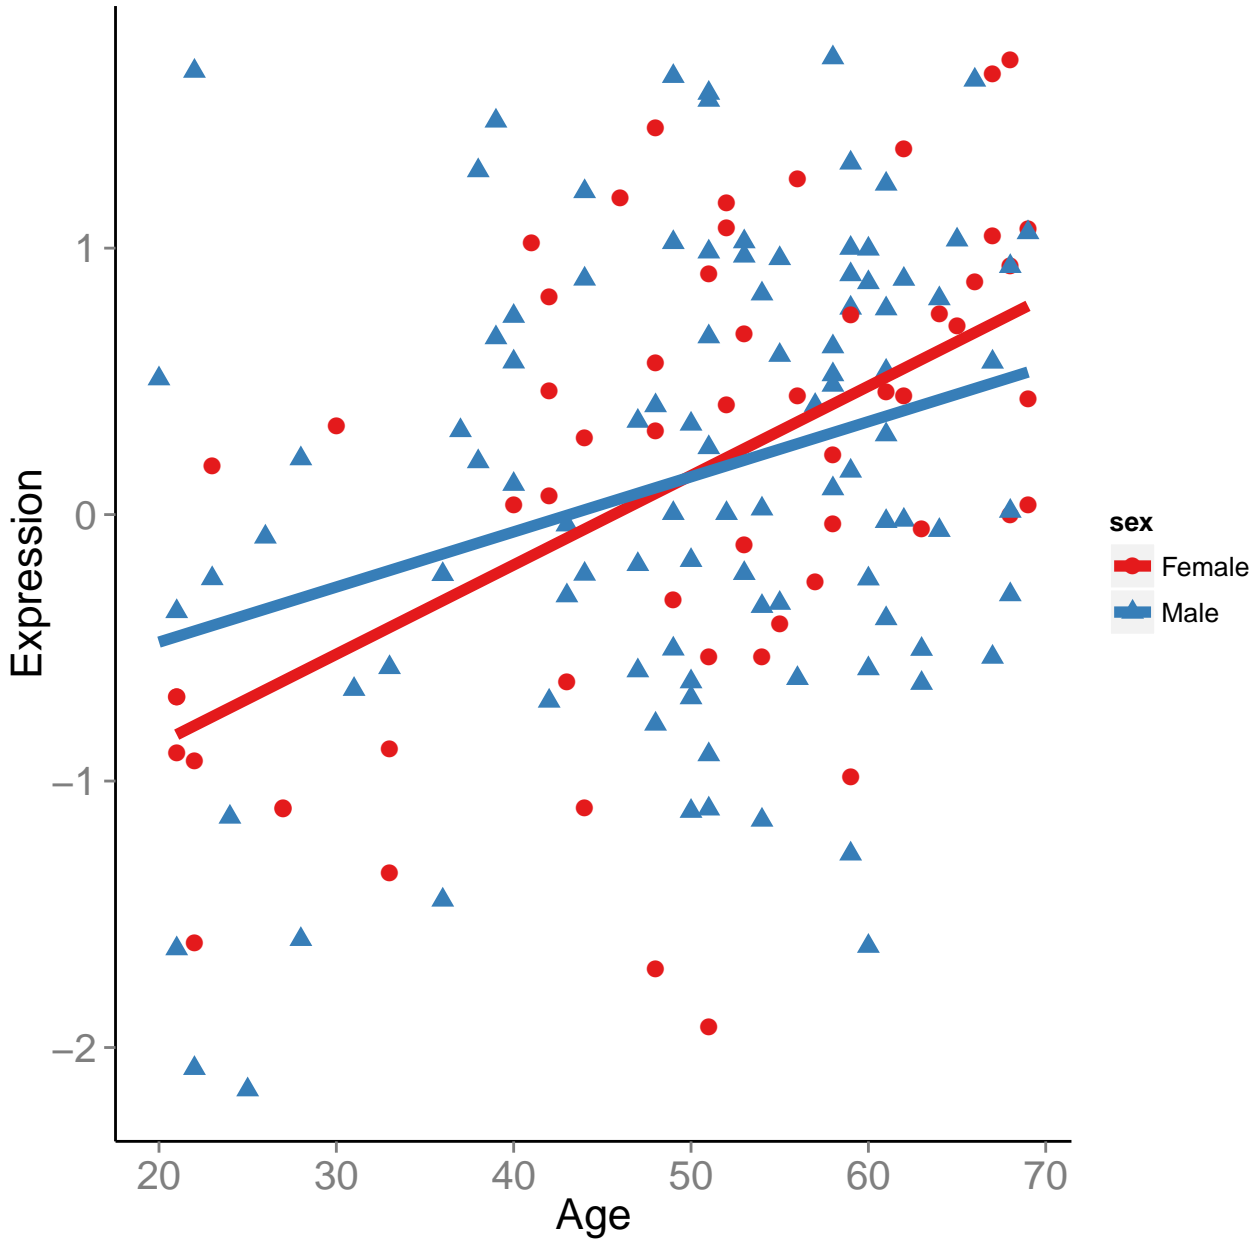

Blood: GLS Pearson-R=0.40 Pval=3.28E-07

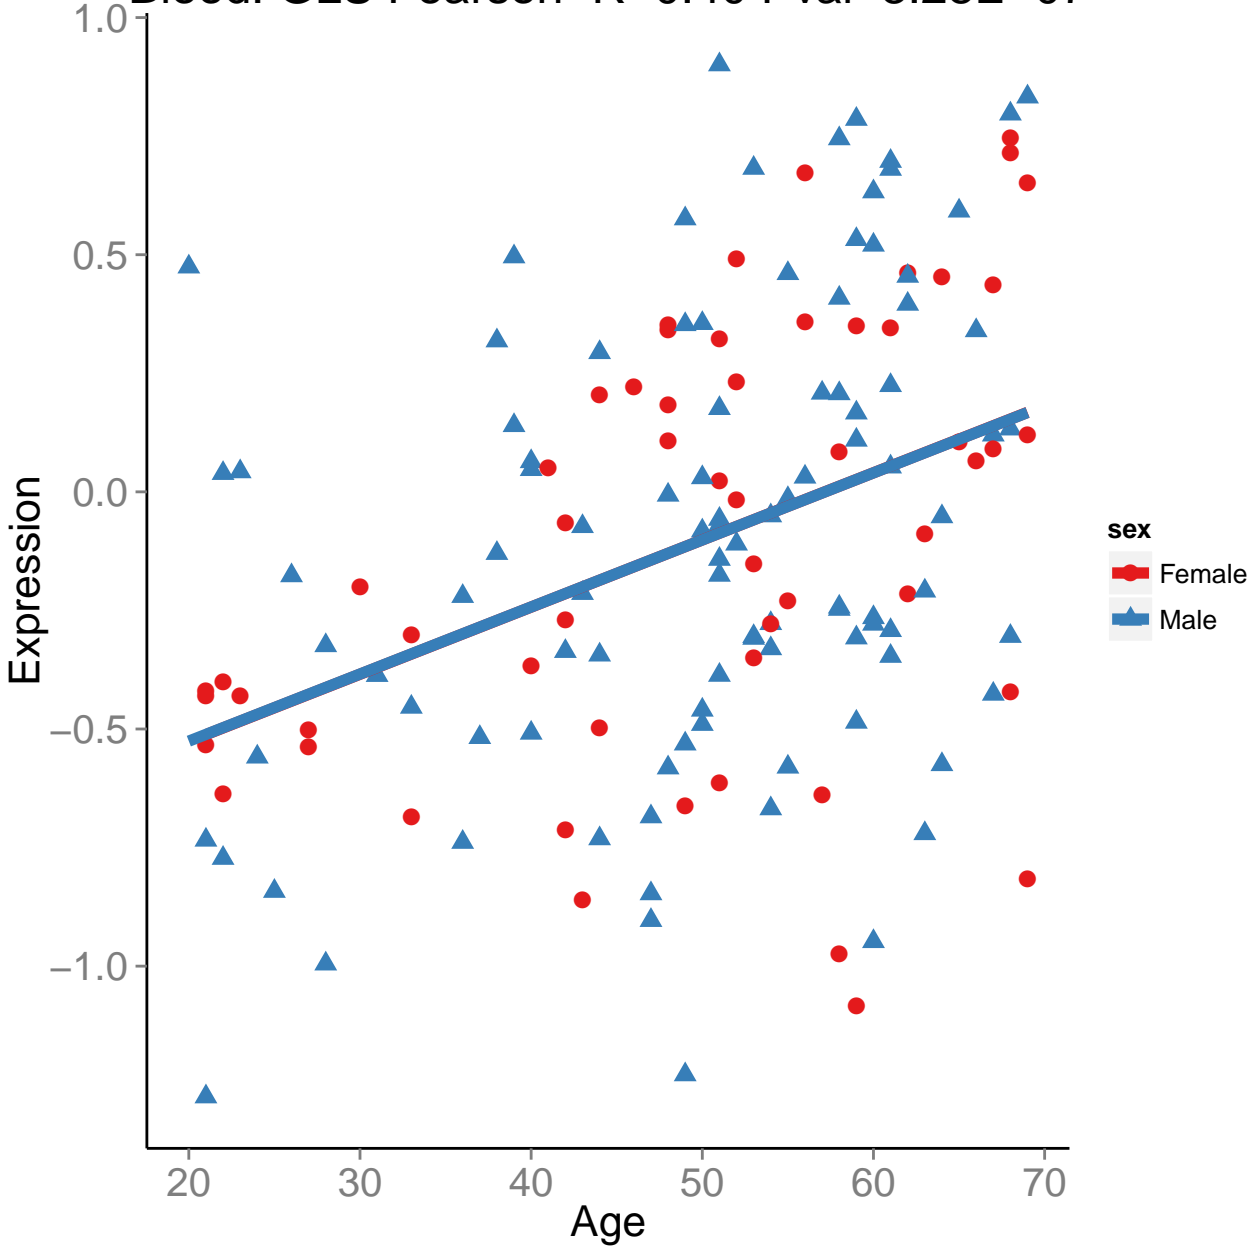

Blood: CCDC88C Pearson-R=0.39 Pval=3.38E-07

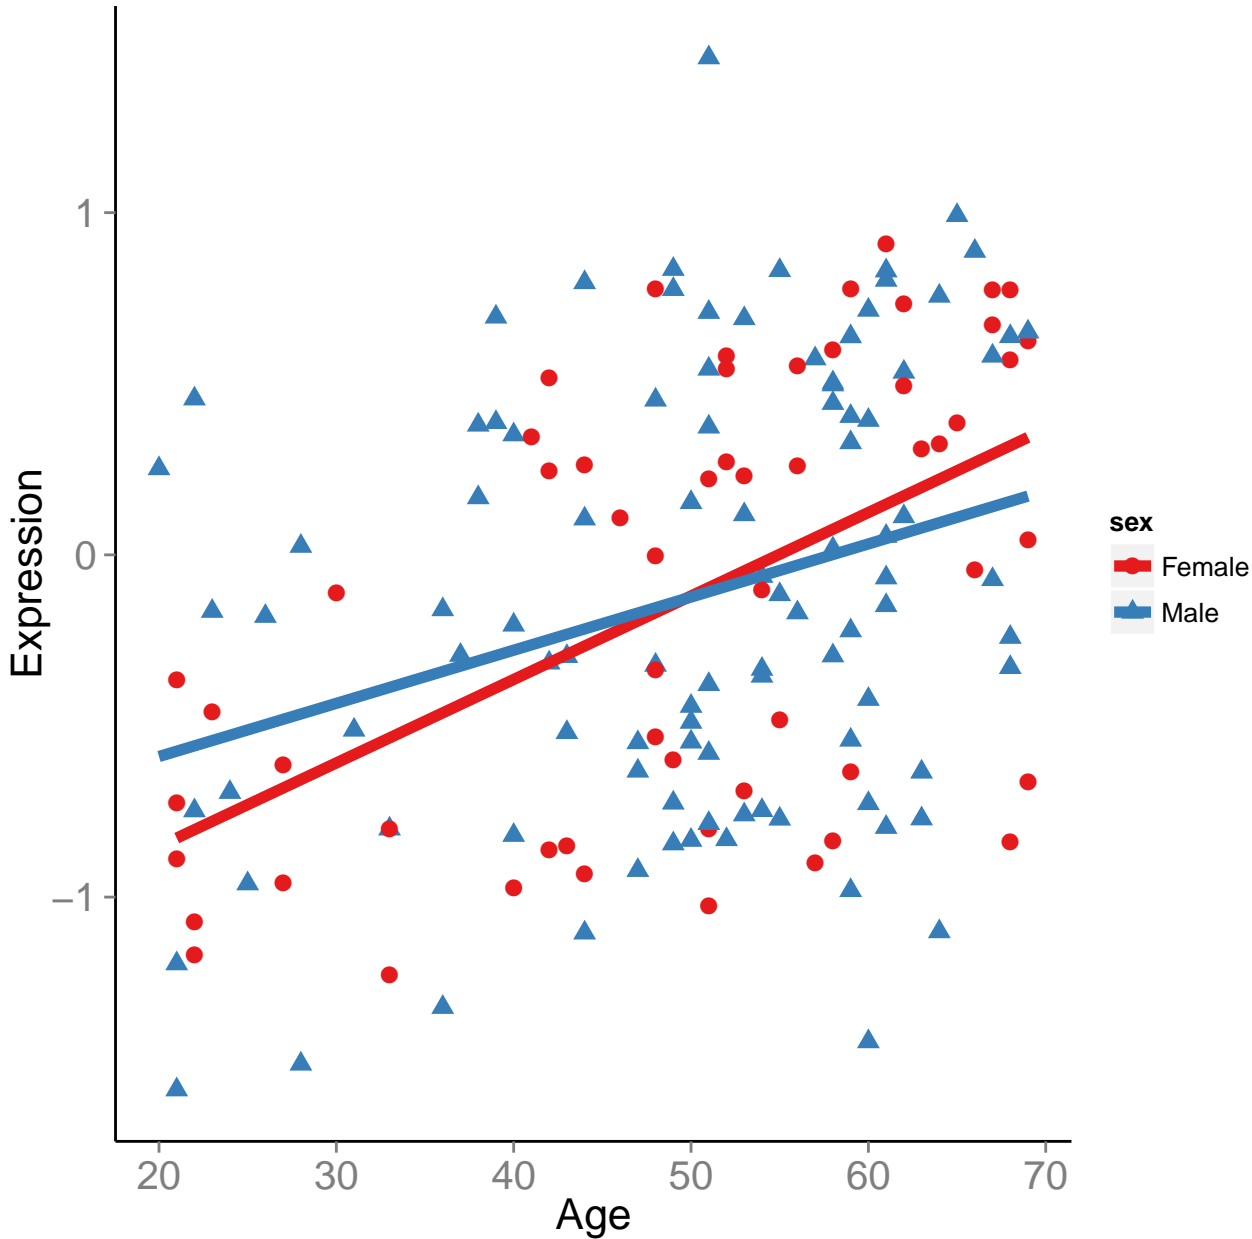

Blood: TPM3 Pearson-R=-0.39 Pval=3.40E-07

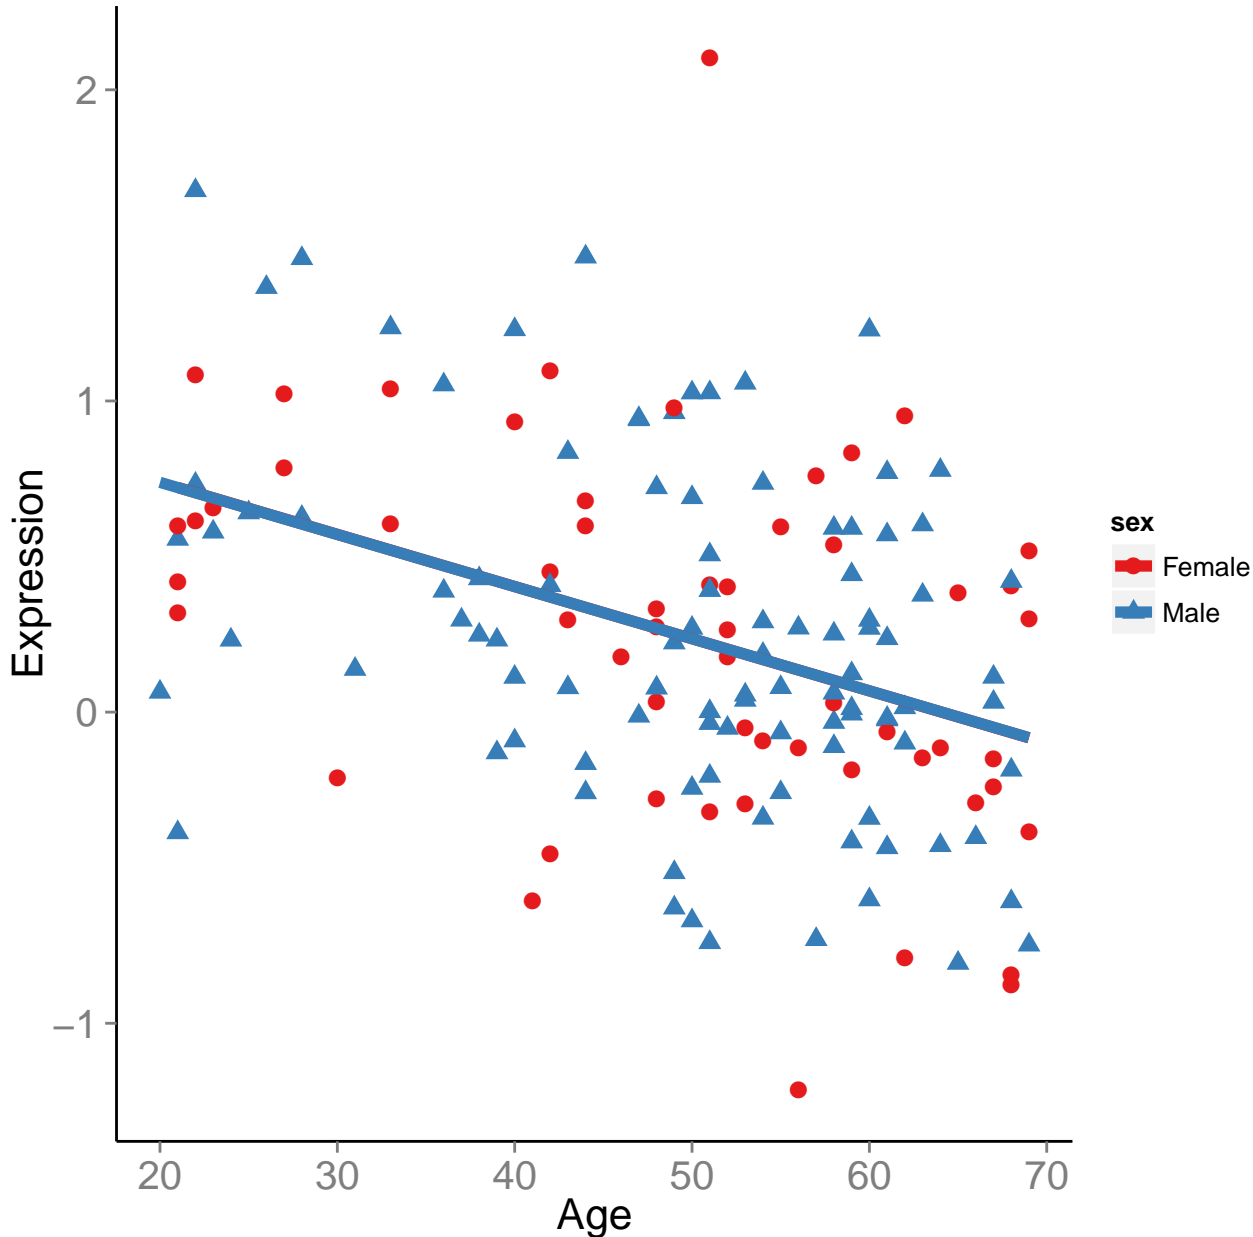

Blood: FBXL6 Pearson-R=0.39 Pval=3.48E-07

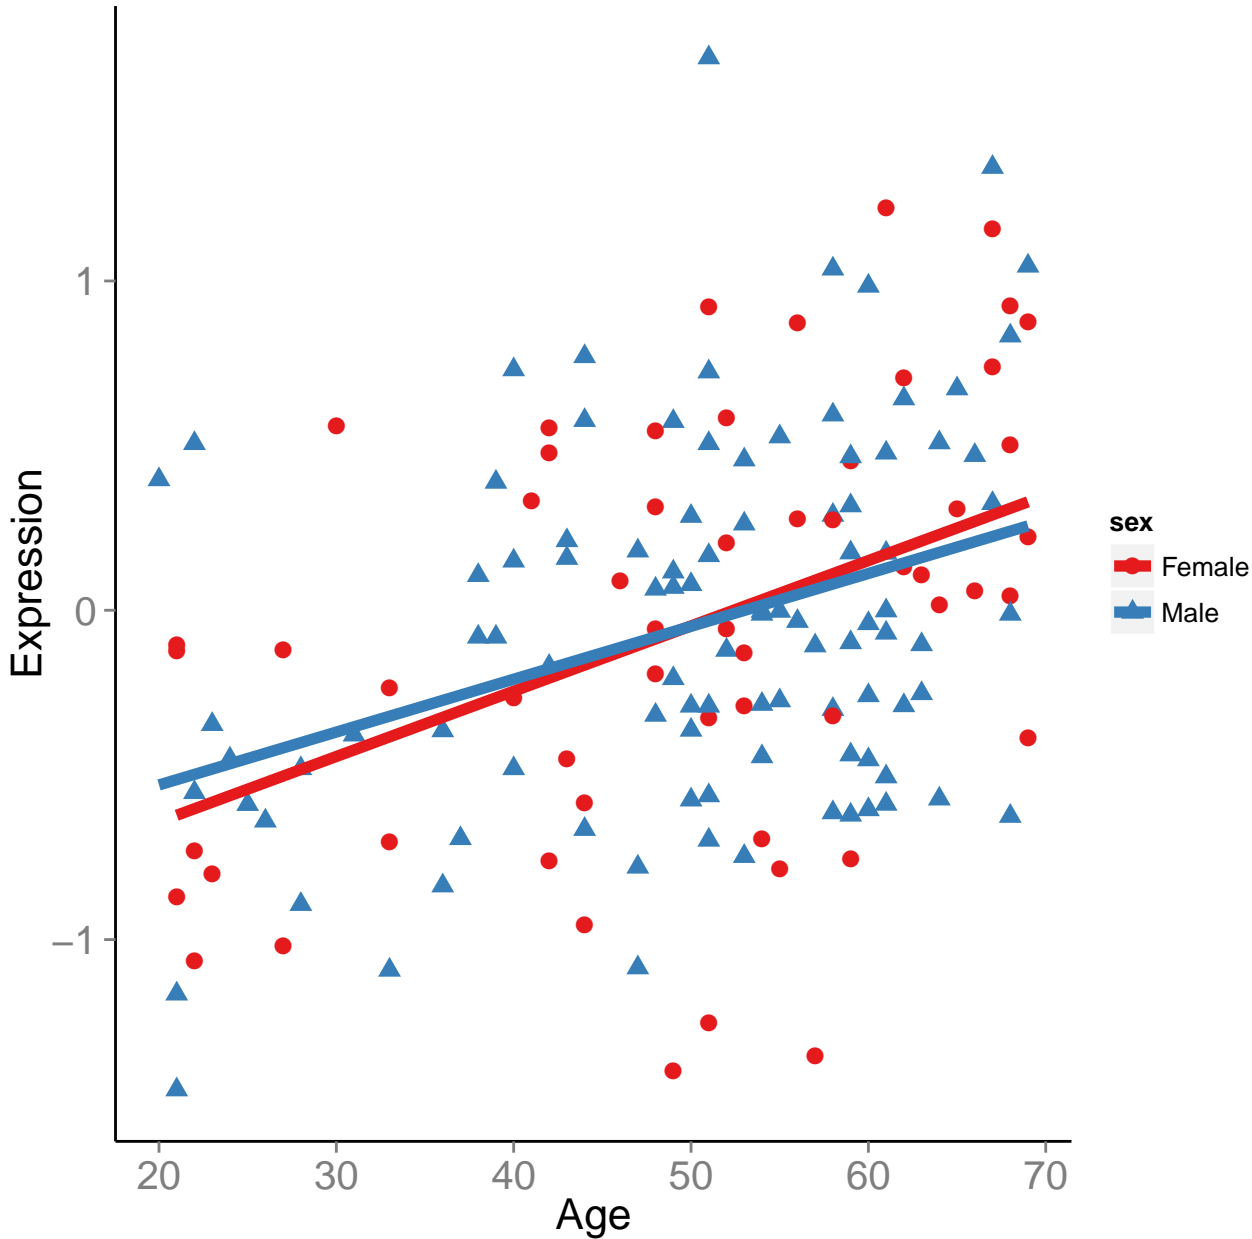

Blood: YBX1P1 Pearson-R=0.39 Pval=3.63E-07

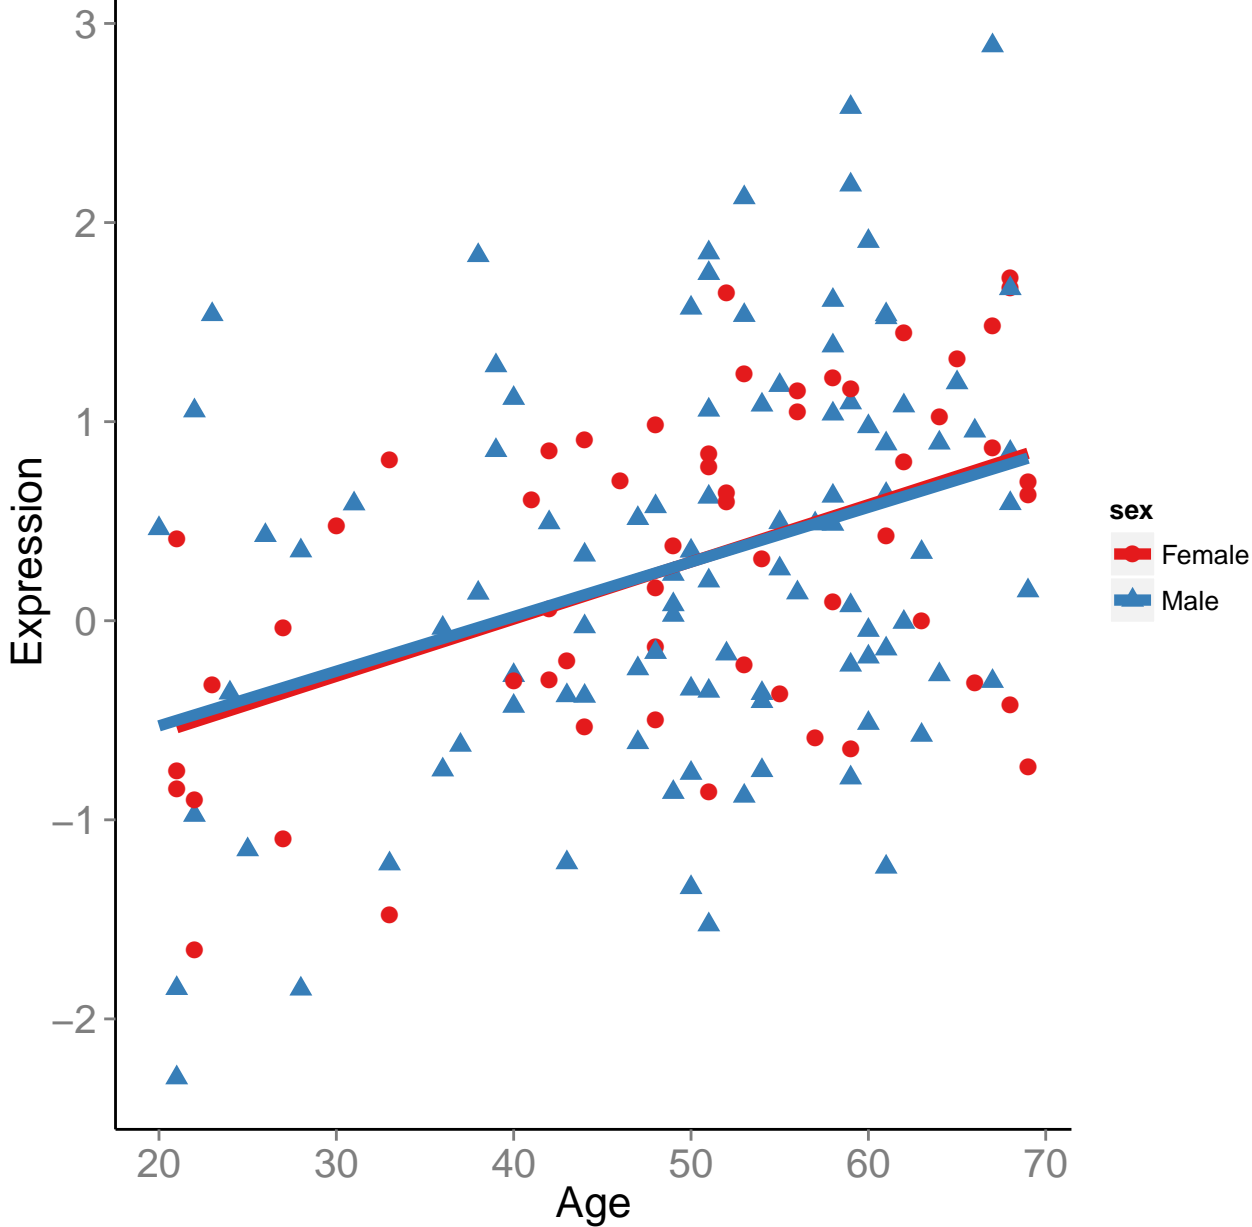

Blood: CCDC107 Pearson-R=0.39 Pval=3.71E-07

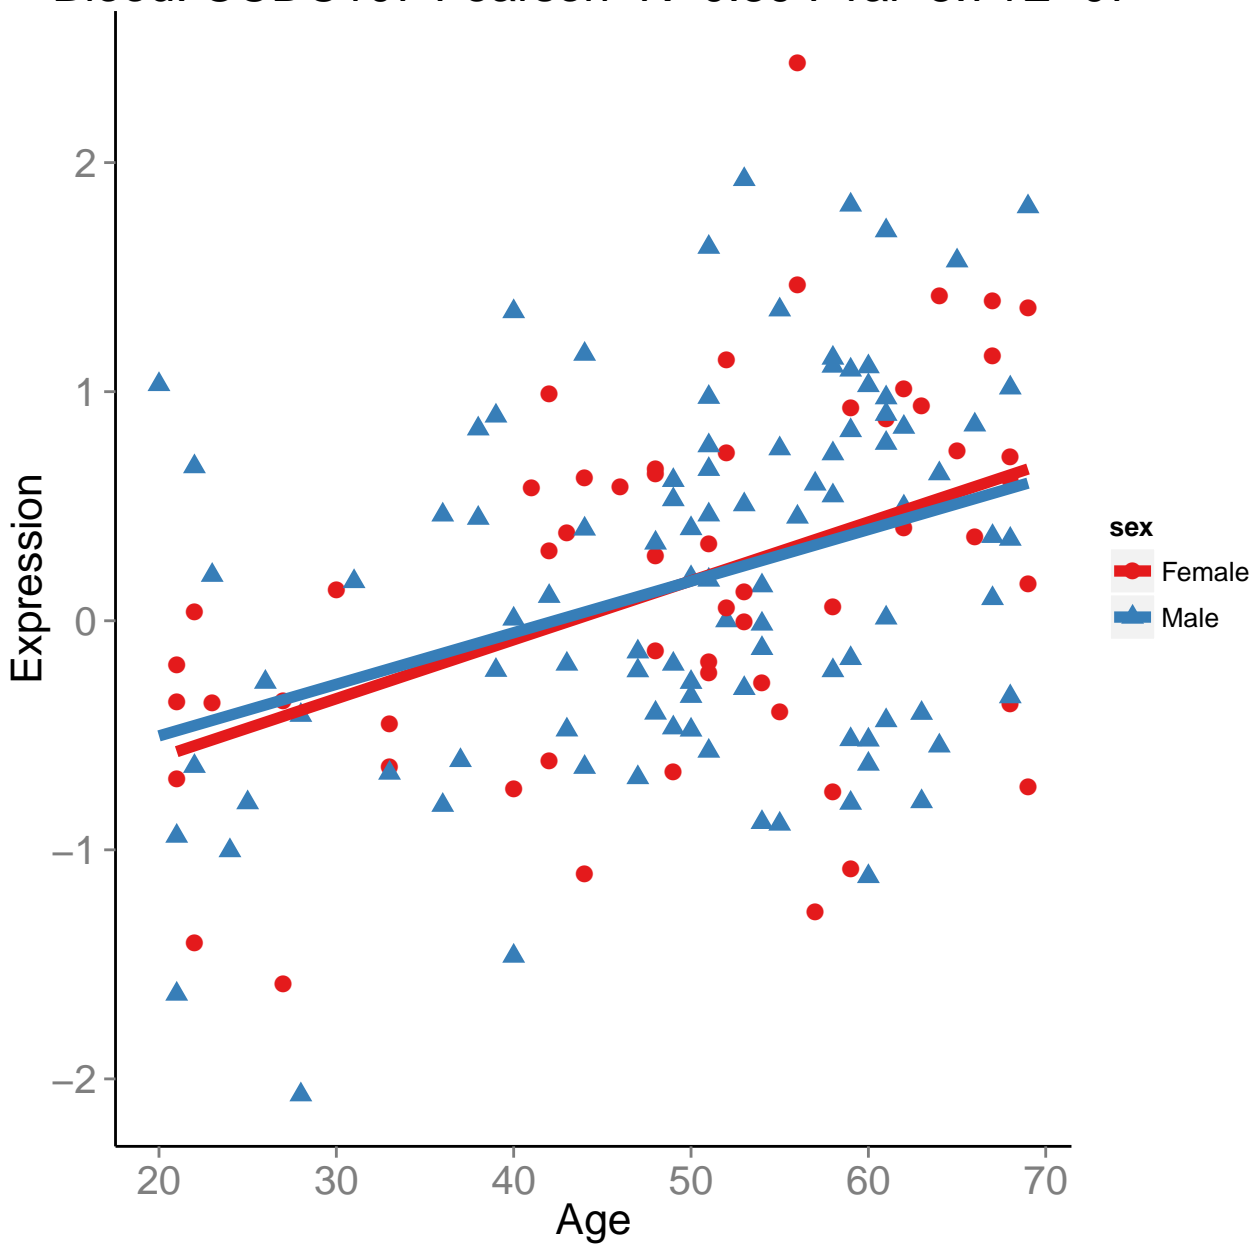



Blood: ARHGEF3 Pearson-R=0.39 Pval=3.87E-07

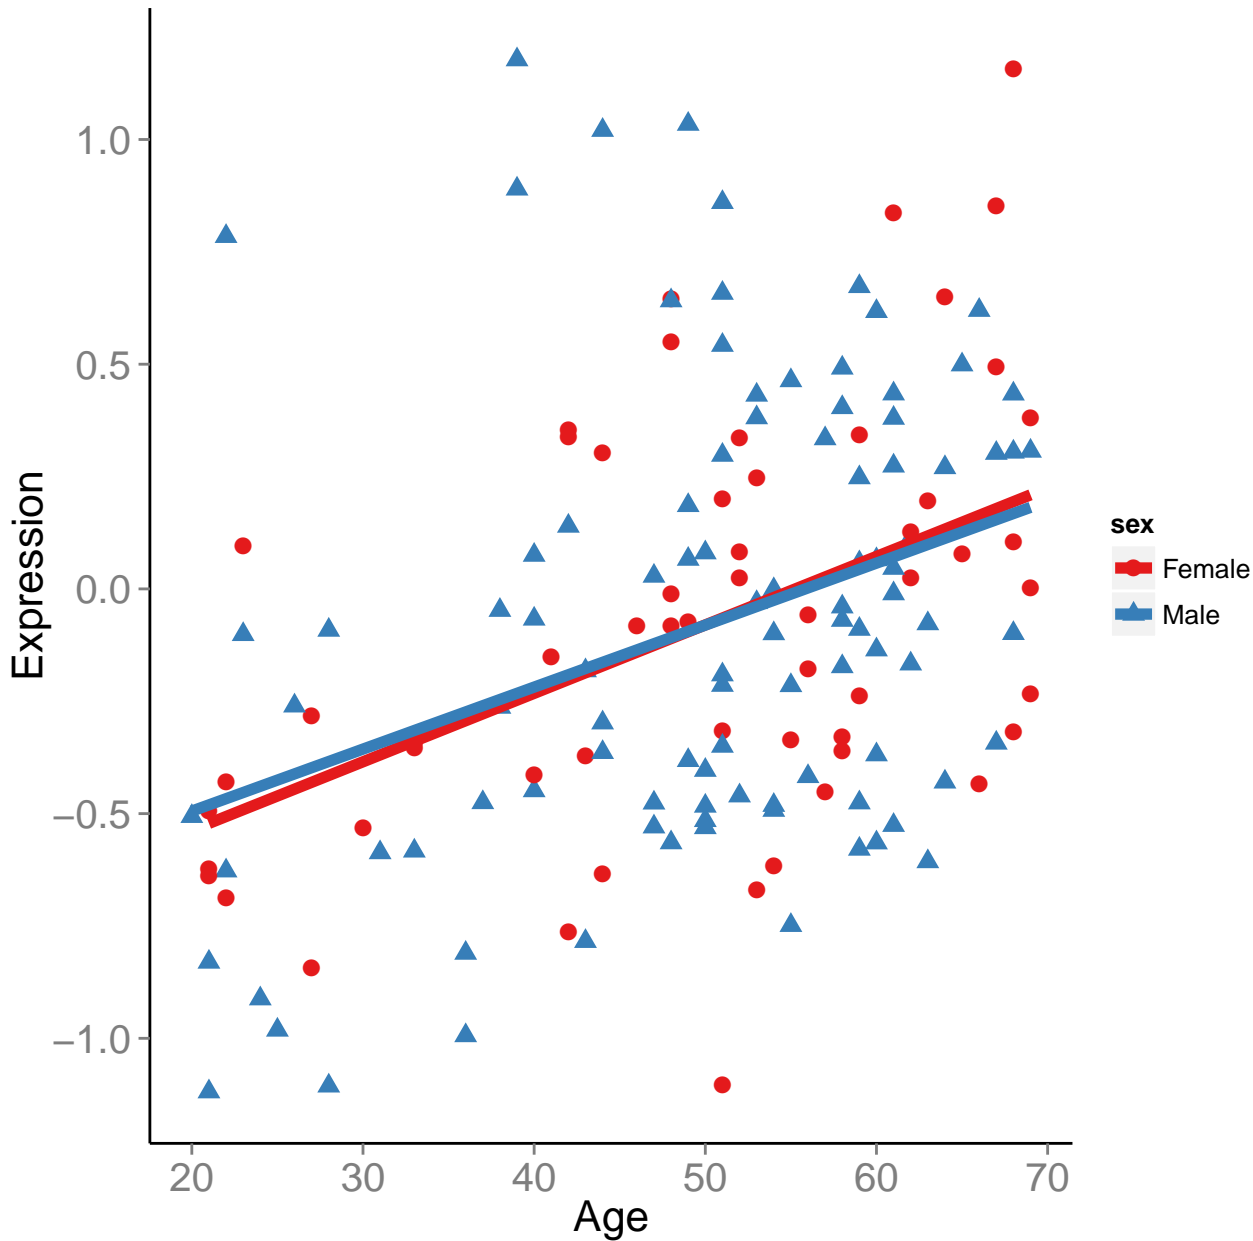

Blood: POP4 Pearson-R=-0.39 Pval=3.80E-07

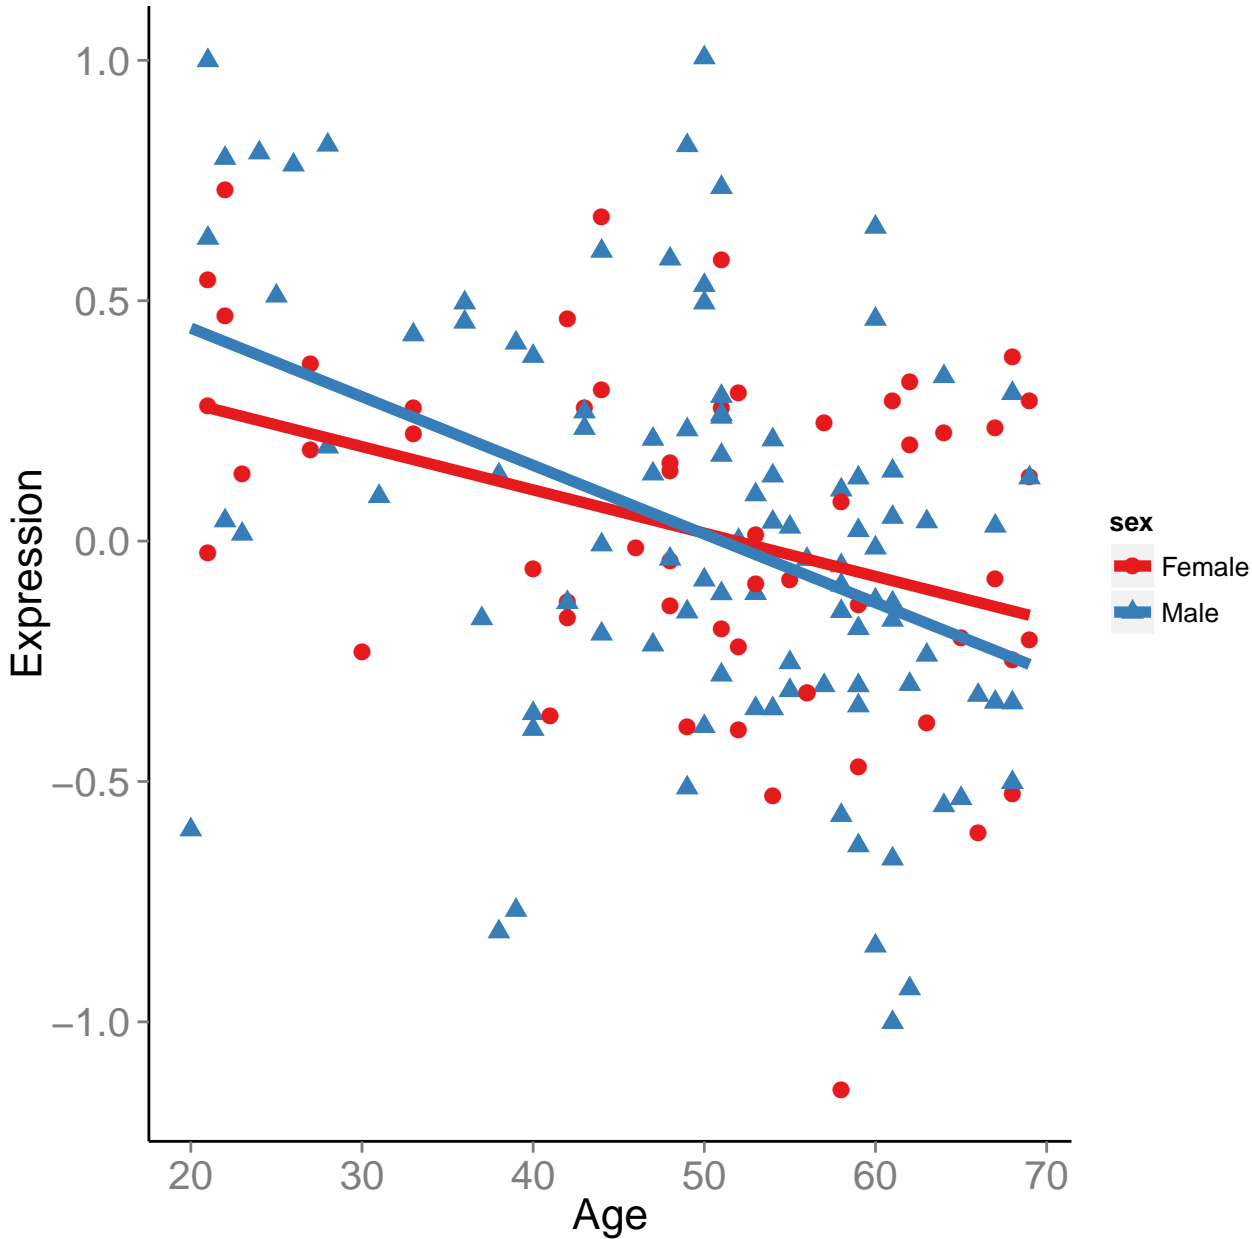

Blood: MYL12A Pearson-R=-0.39 Pval=3.88E-07

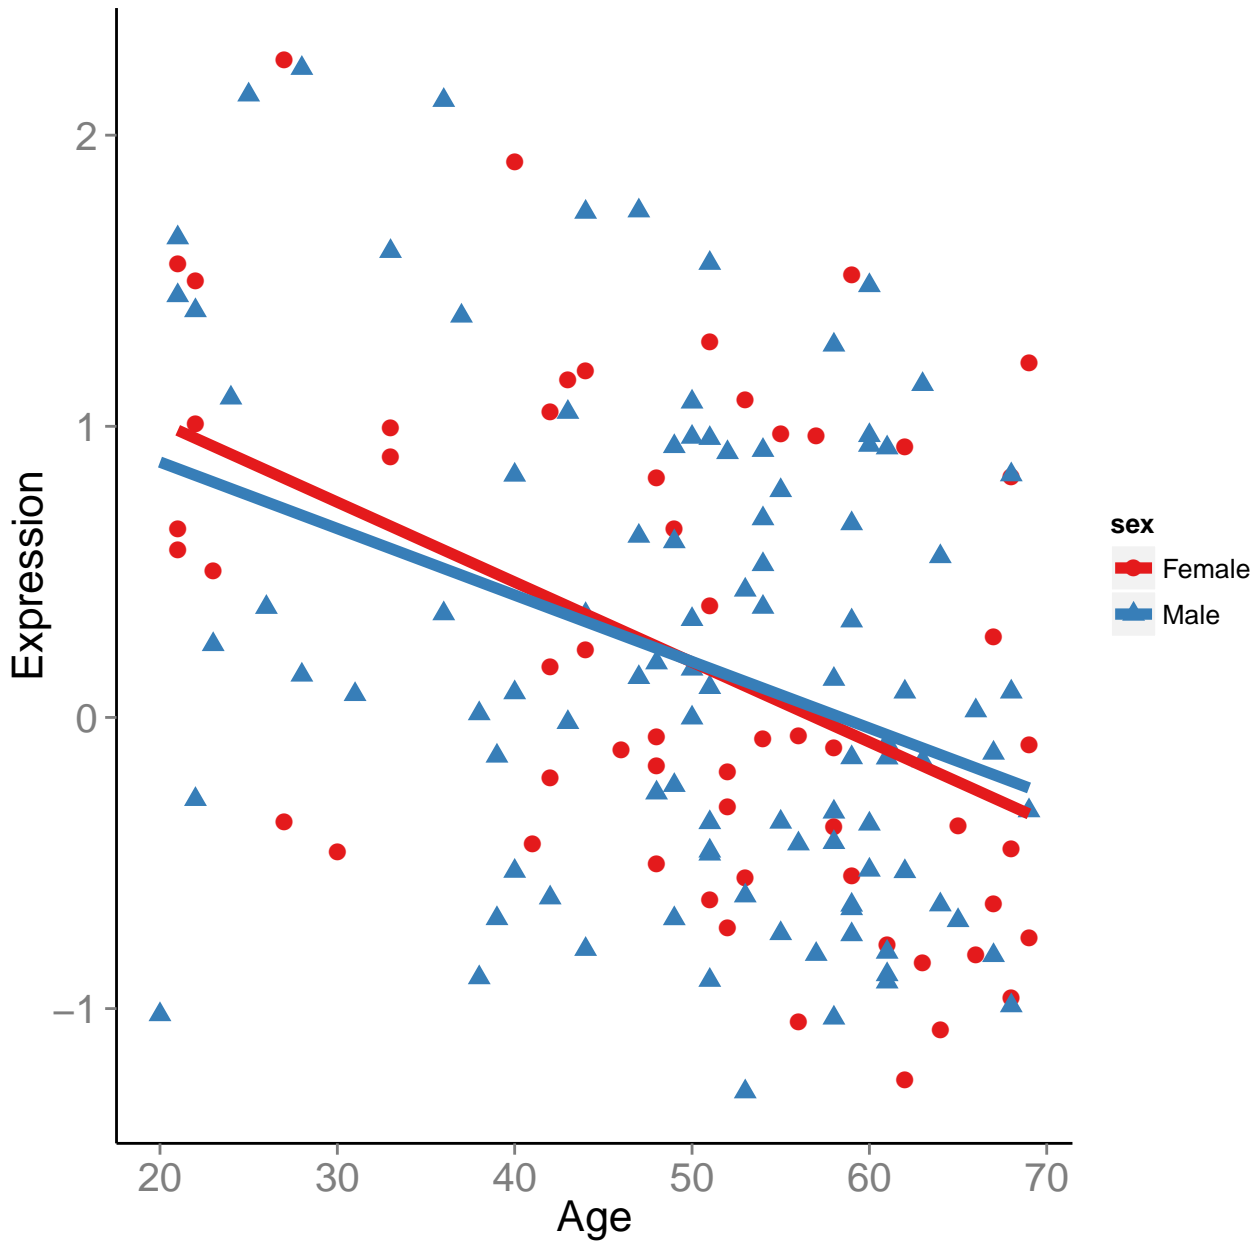

Blood: ADCK5 Pearson-R=0.39 Pval=3.79E-07

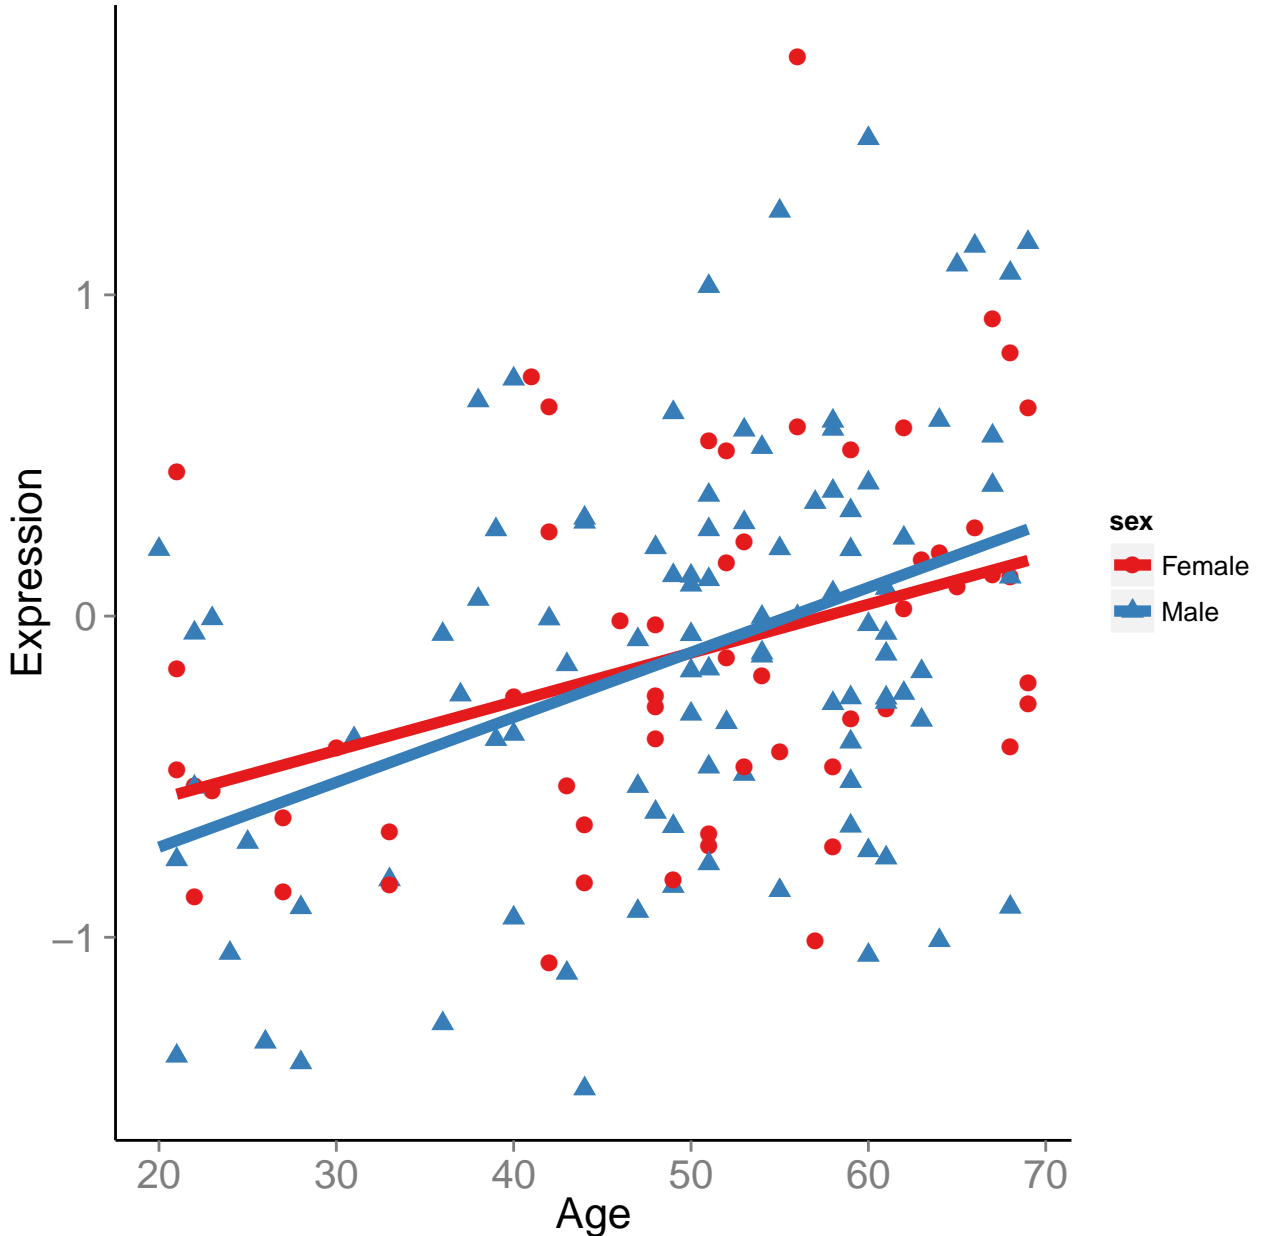

Blood: SPON2 Pearson-R=0.39 Pval=4.10E-07

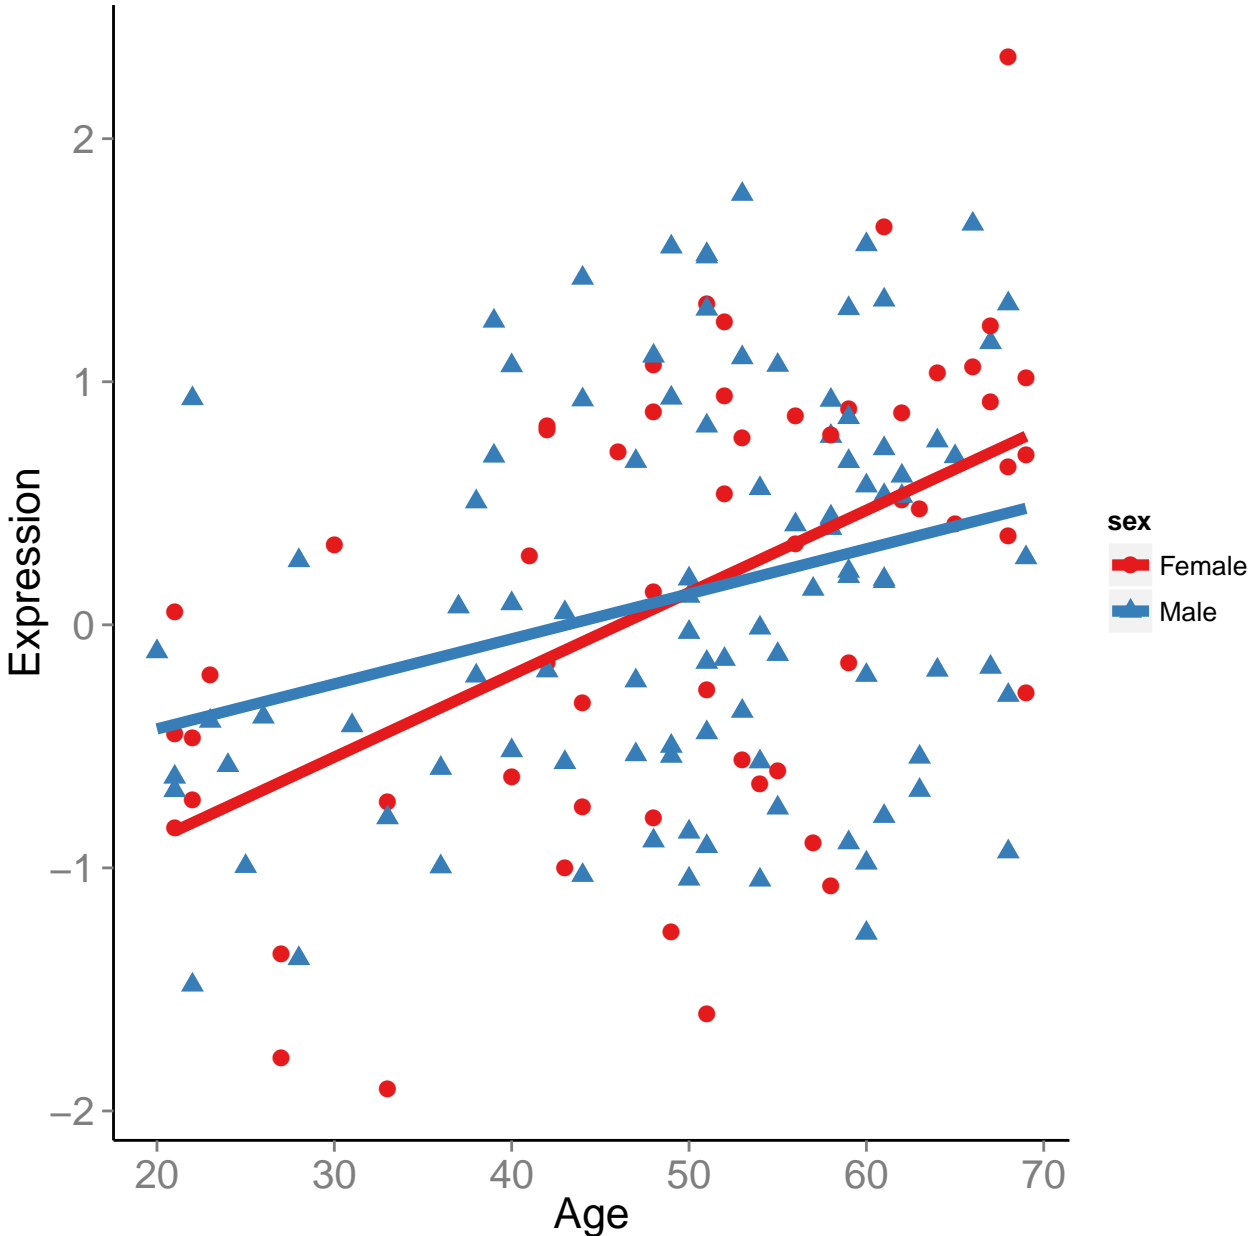

Blood: OSBPL3 Pearson-R=0.39 Pval=4.06E-07

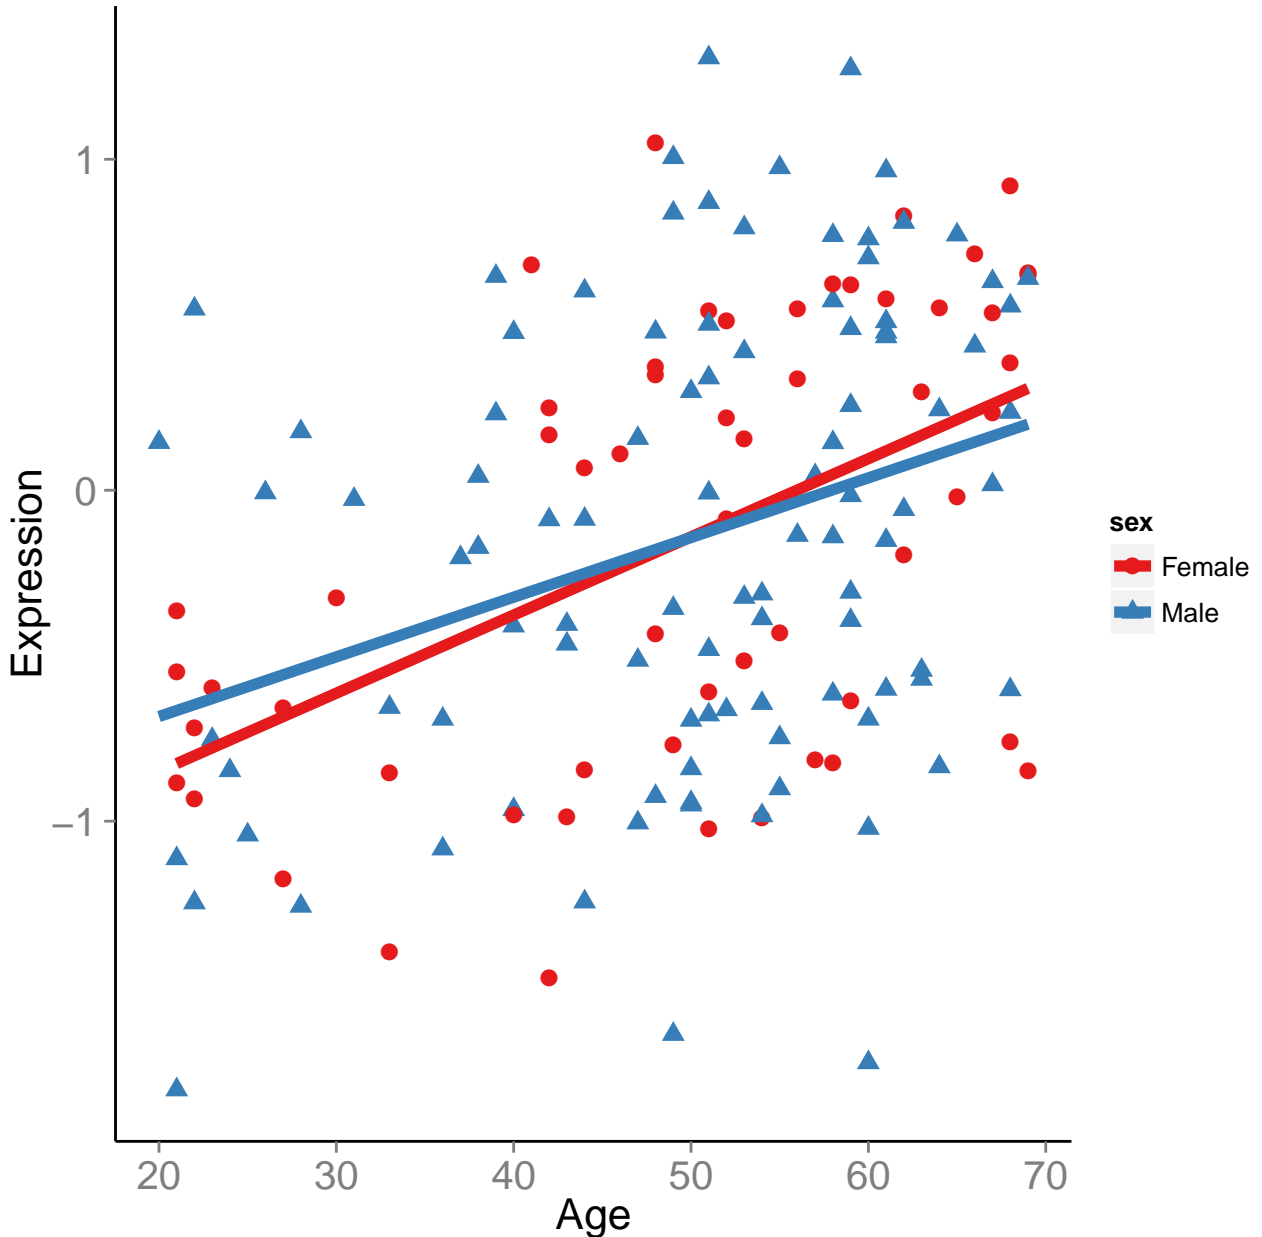

Blood: RP5-1160K1.3 Pearson-R=-0.39 Pval=4.11E-07

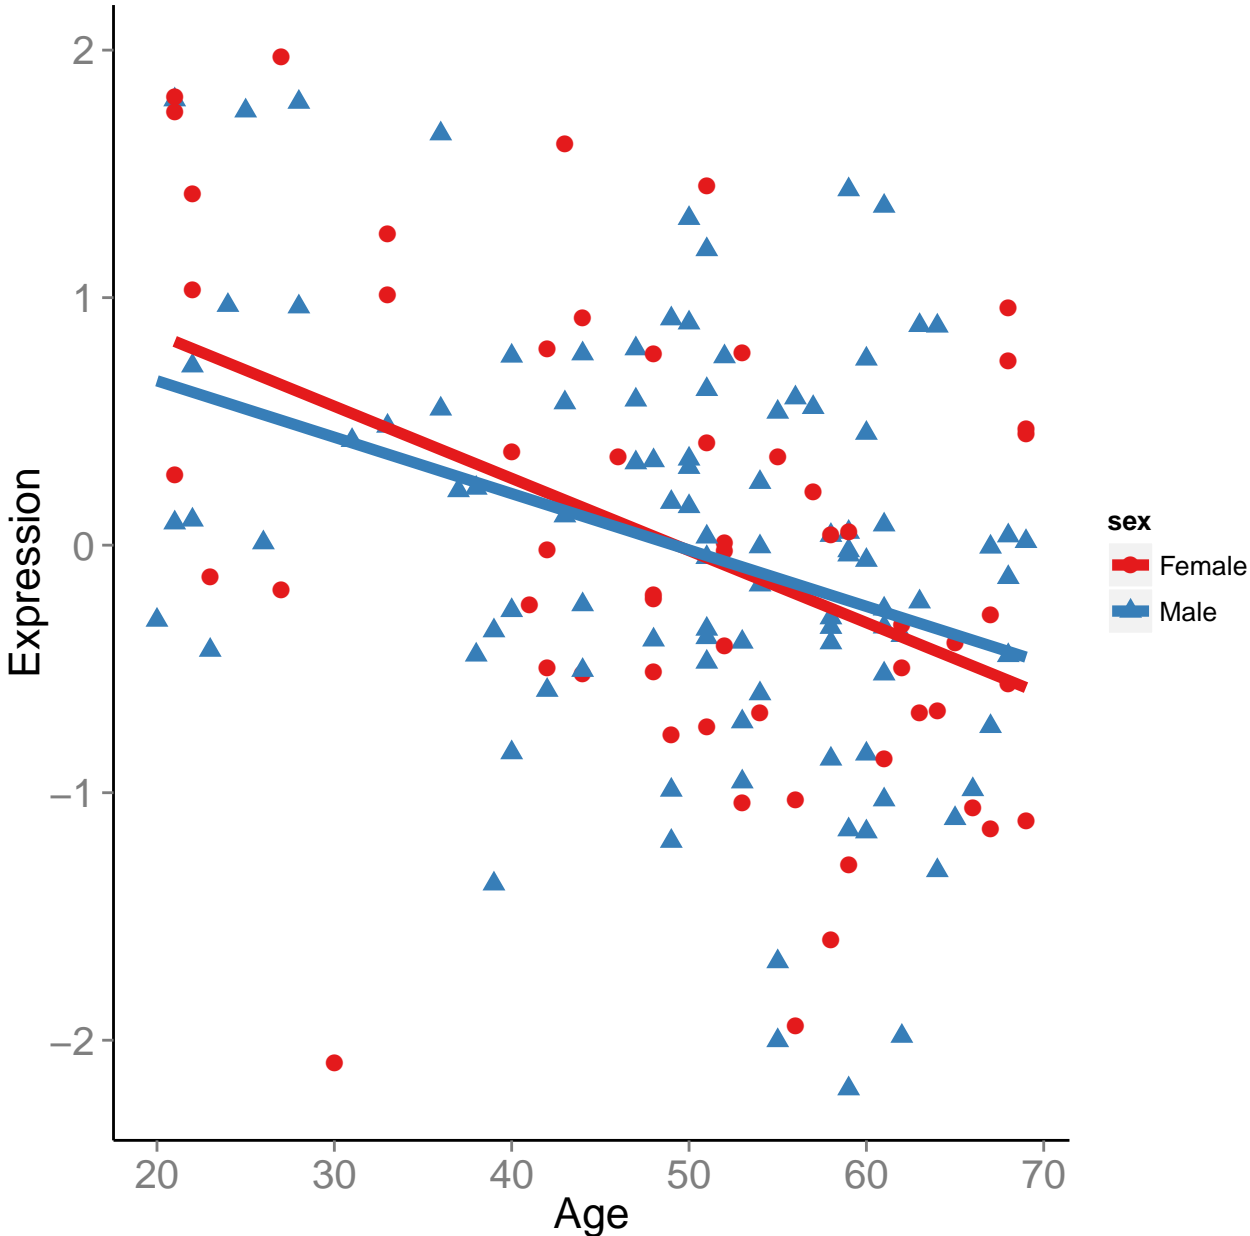

Blood: TMEM216 Pearson-R=-0.39 Pval=4.20E-07

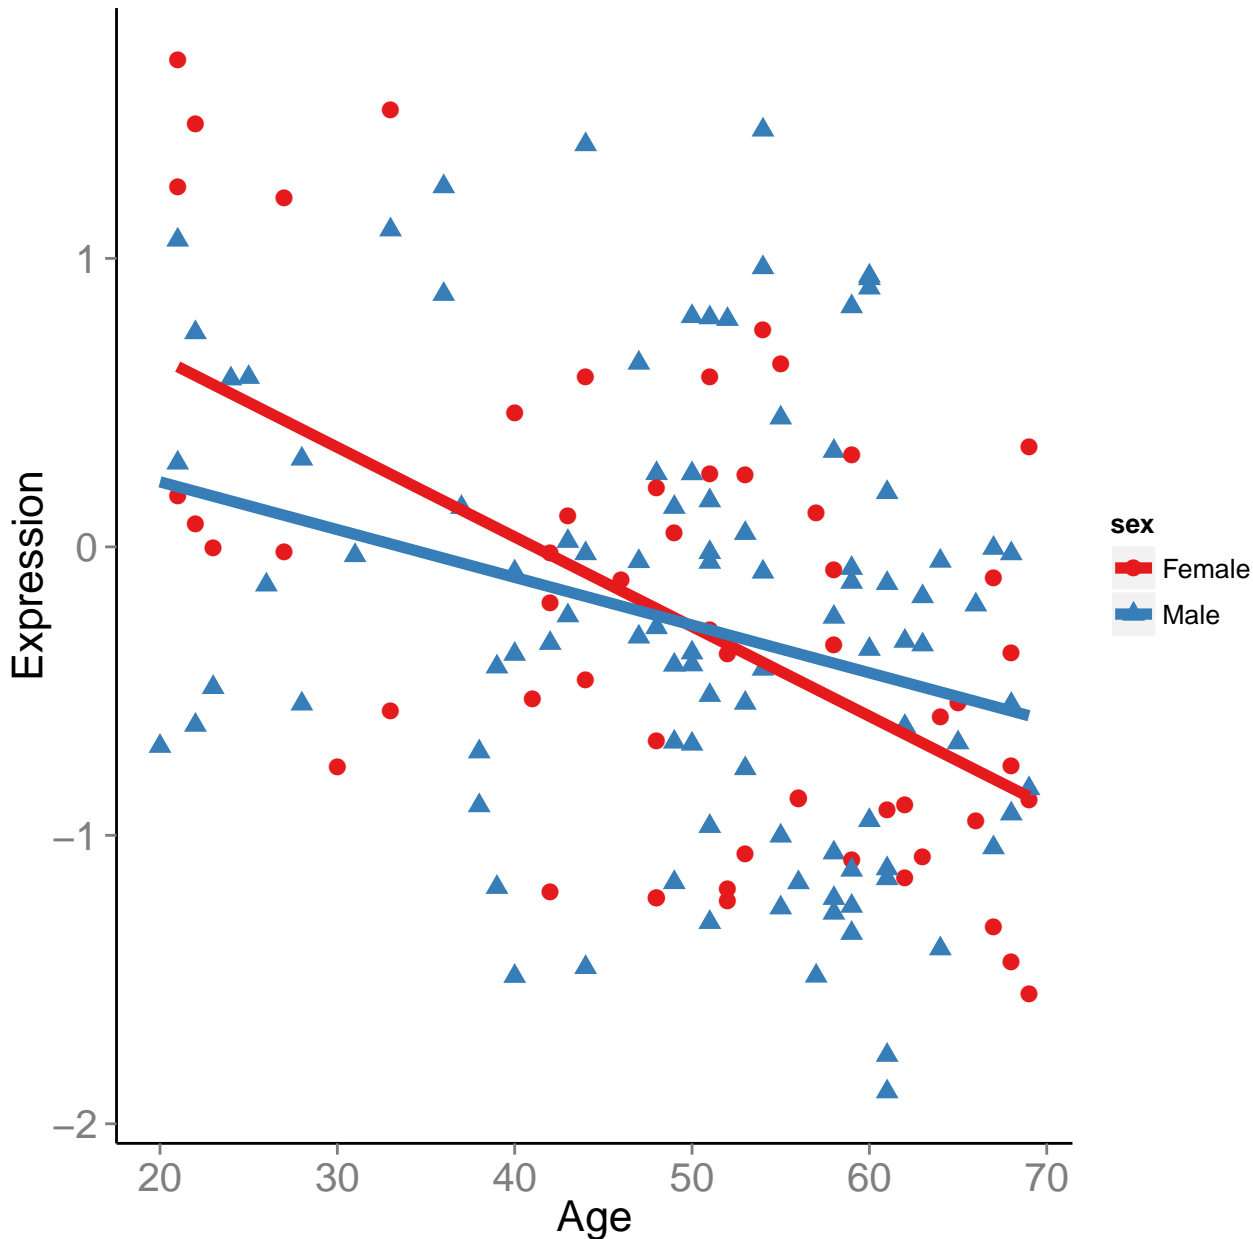



Blood: ZDHHC8 Pearson-R=0.39 Pval=4.20E-07

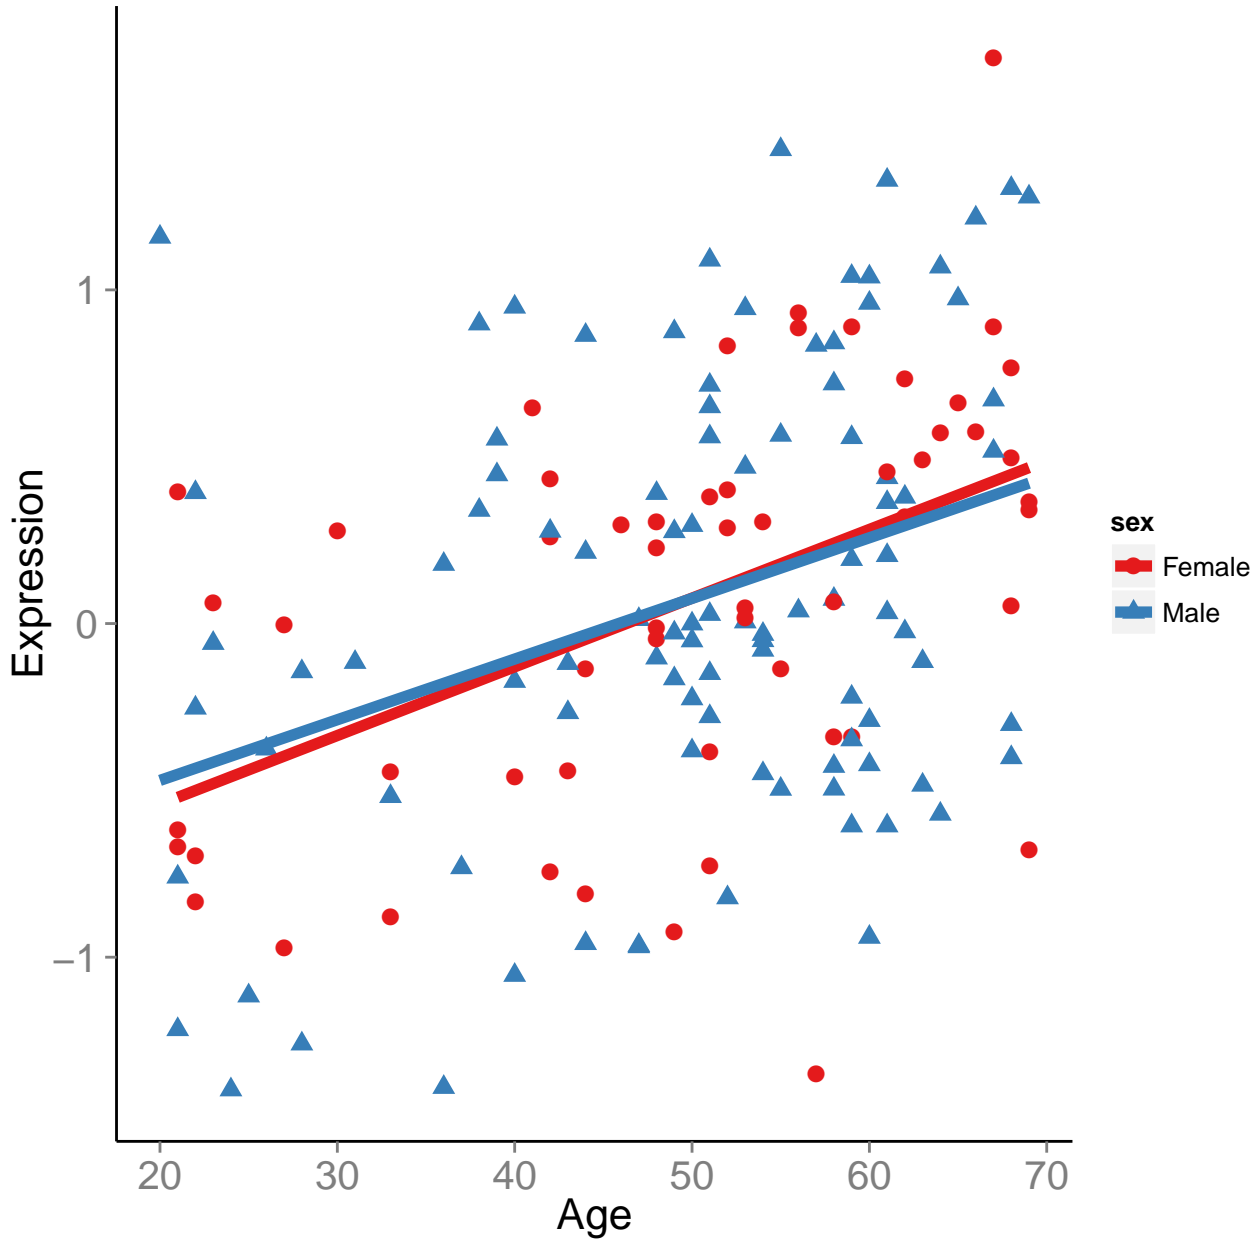

Blood: SYNE2 Pearson-R=0.39 Pval=4.48E-07

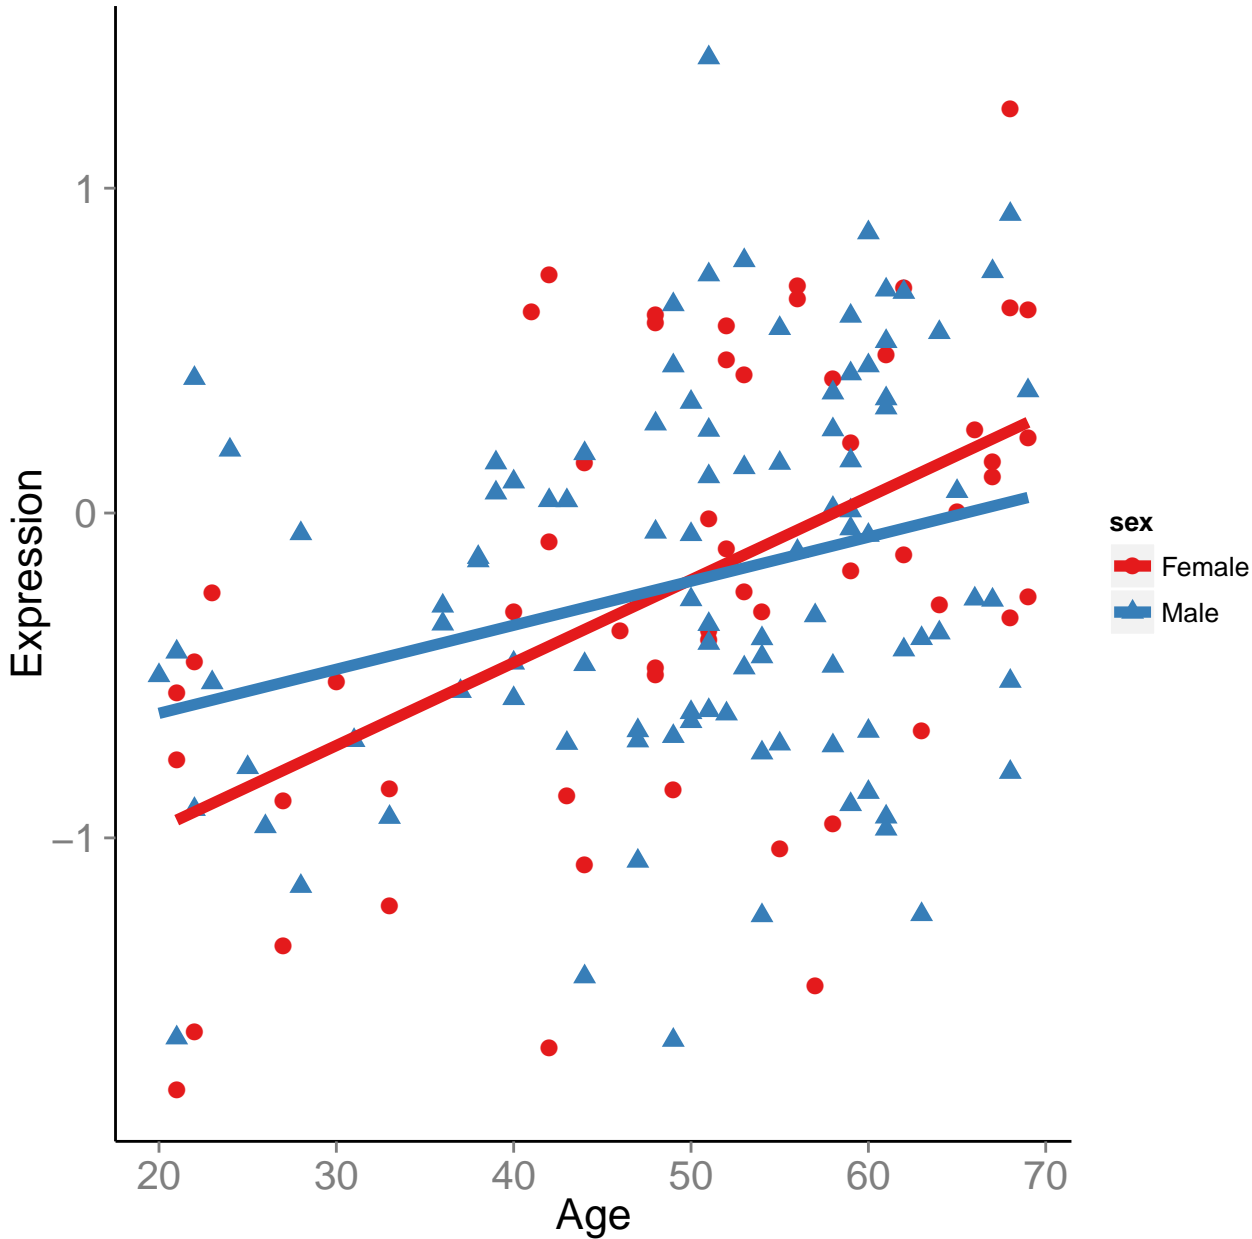

Blood: TTC8 Pearson-R=-0.39 Pval=4.46E-07

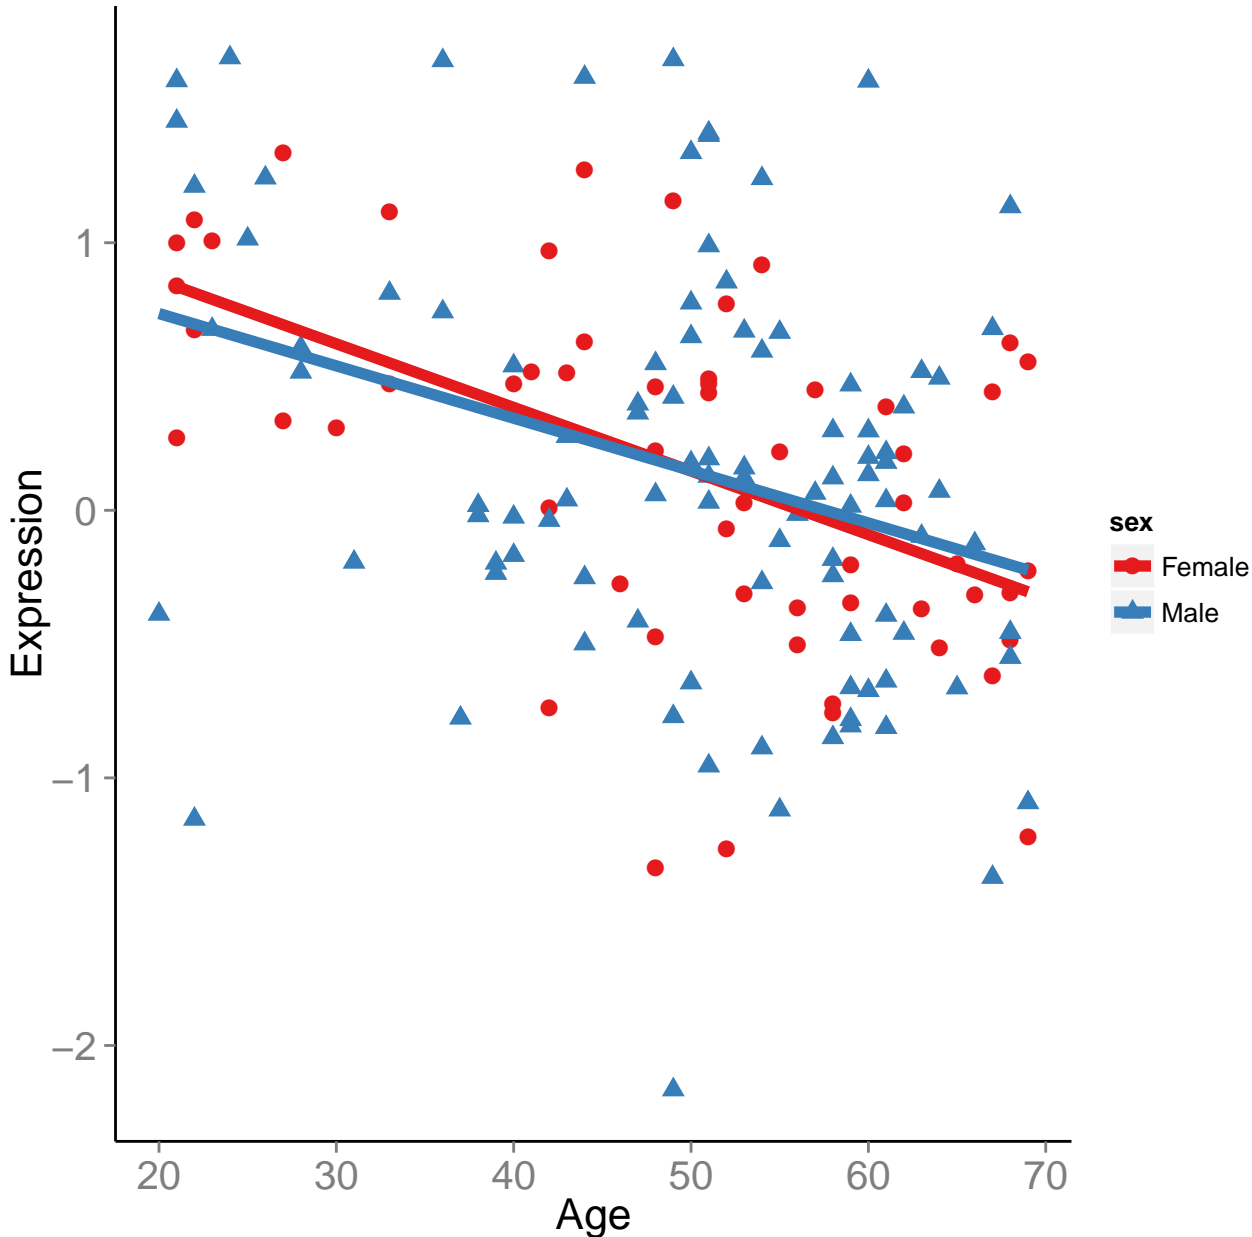

Blood: DDX39A Pearson-R=0.39 Pval=4.46E-07

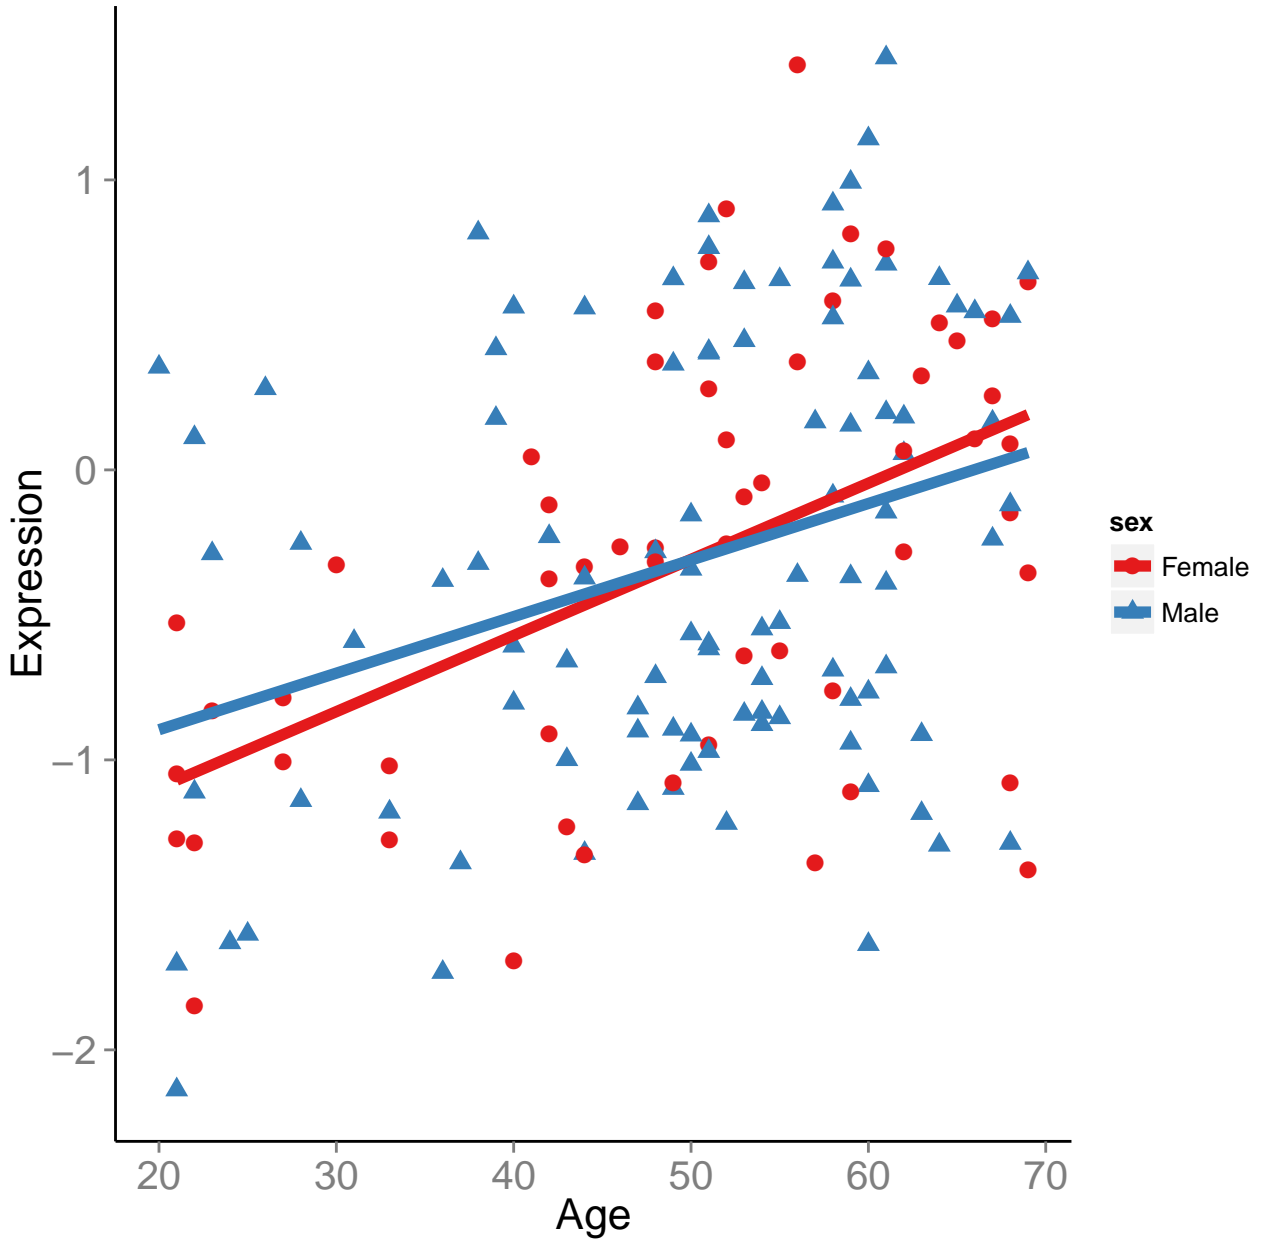

Blood: PRF1 Pearson-R=0.39 Pval=4.35E-07

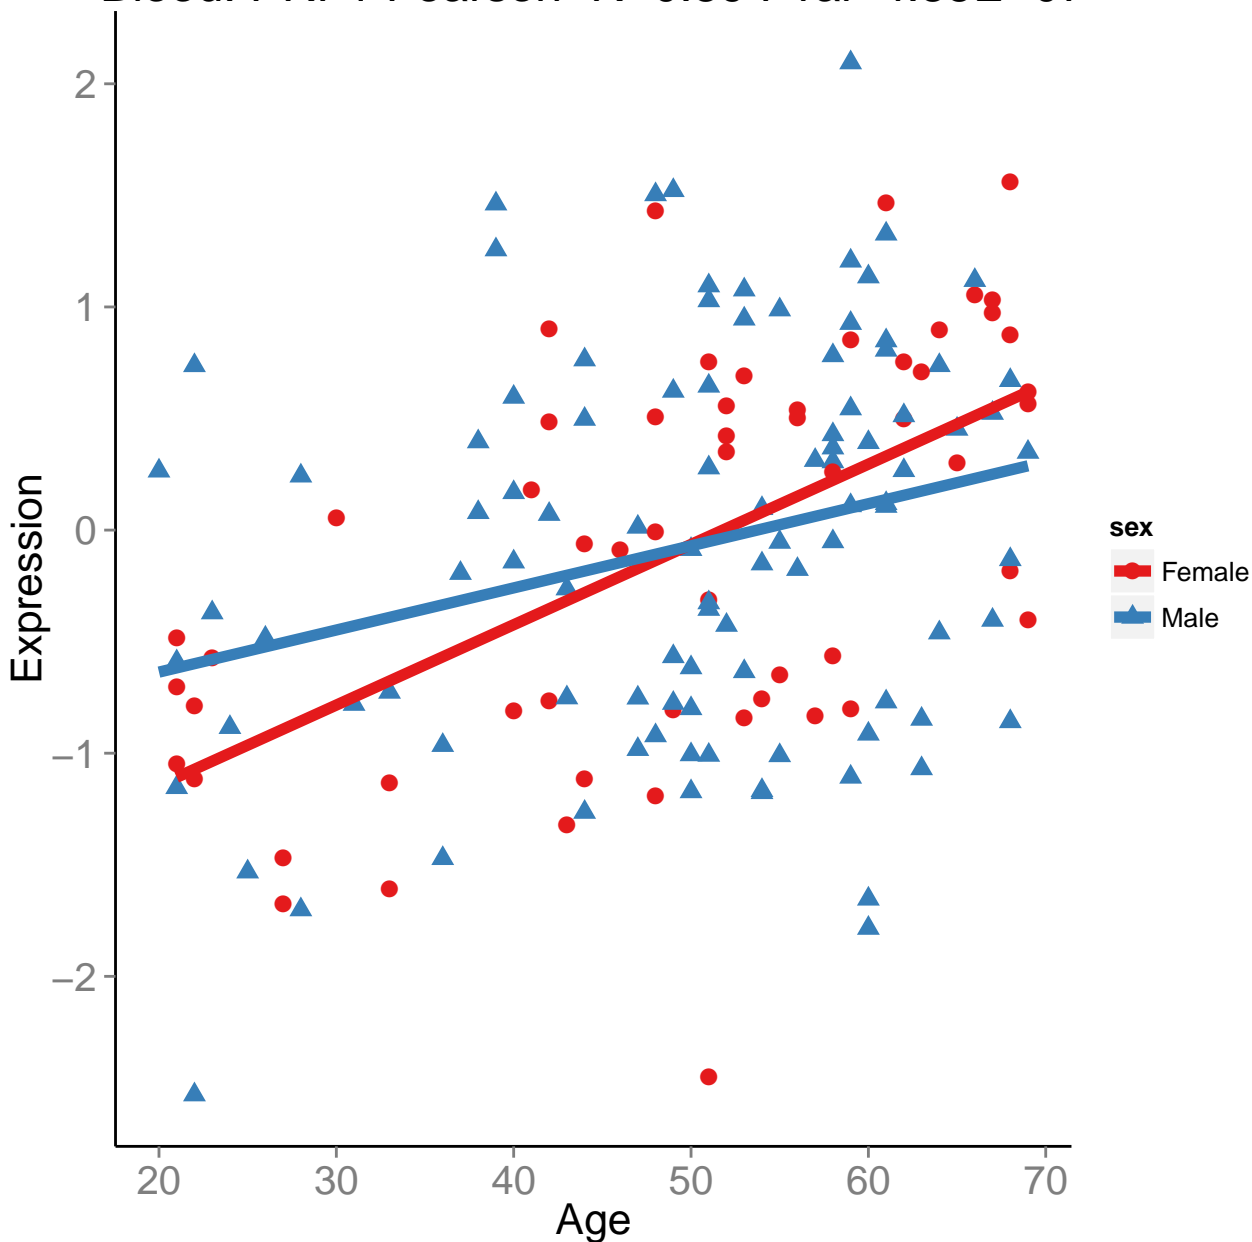

Supplement: srep15145-s3.pdf [file srep15145-s3.pdf]
